# Supplementary material for: Relative contributions of sex hormones, sex chromosomes, and gonads to sex differences in tissue gene regulation
Source: Genome Res. 2022 May;32(5):807–24. doi: 10.1101/gr.275965.121 (PMC9104702; doi:10.1101/gr.275965.121)
Supplement: Supplemental Material [file supp_gr.275965.121_Supplemental_Table_S2.xlsx]

## Sheet: Interaction DEG list
Supplemental Table S2: DEGs for the interaction terms from ANOVA analysis for inguinal adipose and liver
Inguinal Adipose
Analysis	Treatment/Genotype	Factor	DEGs at FDR<0.05	DEG List
3-way ANOVA	T+B	Gonad:Hormone	2	Pals1, Sephs1
		Chromosome:Hormone	1	Pals1
		Chromosome:Gonad	1	Pals1
		Chromosome:Gonad:Hormone	1	Pals1
	E+B	Gonad:Hormone	31	Dnai1, Ptn, Cited1, Ctns, Slc2a3, Tuft1, Lamb3, Tmem86a, Atp1b1, Mycl, Mfsd2a, Sytl2, Tmed3, Atg9b, Pxylp1, Adra2a, Trp63, Hsd11b1, Dnajc12, Gas6, Anxa8, Myl12a, Pals1, Lrrc26, Tapt1, Anln, Stc2, Tlcd3a, Acsl3, S100a14, Ier3
		Chromosome:Hormone	1	Dnai1
		Chromosome:Gonad	0	N/A
		Chromosome:Gonad:Hormone	0	N/A
2-way ANOVA	T	Gonad:Chromosome	0	N/A
	E	Gonad:Chromosome	1	Map7d3
	B	Gonad:Chromosome	2	Pals1, Sorbs3
Liver
Analysis	Treatment/Genotype	Factor	DEGs at FDR<0.05	DEG List
3-way ANOVA	T+B	Gonad:Hormone	10	Cyp3a41a, Sult3a1, Cyp2d9, Obp2a, Igfbp2, Cyp17a1, Nat8, Cyp4a12a, Susd4, Cxcl9
		Chromosome:Hormone	0	N/A
		Chromosome:Gonad	0	N/A
		Chromosome:Gonad:Hormone	0	N/A
	E+B	Gonad:Hormone	2	Slc11a1, Sult3a1
		Chromosome:Hormone	0	N/A
		Chromosome:Gonad	0	N/A
		Chromosome:Gonad:Hormone	0	N/A
2-way ANOVA	T	Gonad:Chromosome	0	N/A
	E	Gonad:Chromosome	2	Plekhg6, H2-DMb1
	B	Gonad:Chromosome	0	N/A
