# Supplementary material for: Relative contributions of sex hormones, sex chromosomes, and gonads to sex differences in tissue gene regulation
Source: Genome Res. 2022 May;32(5):807–24. doi: 10.1101/gr.275965.121 (PMC9104702; doi:10.1101/gr.275965.121)
Supplement: Supplemental Material [file supp_gr.275965.121_Supplemental_Table_S3.xlsx]

## Sheet: Description
Supplemental Table S3: Full DEG list from all ANOVAs for adipose tissue
Information on the given tabs are found below
Master	Summary of all DEGs either p-value or FDR
p-value	Summary of all DEGs by p-value
FDR	Summary of all DEGs by FDR

## Sheet: Master
GENE_ID	3WA_T_chr.p	3WA_T_sry.p	3WA_T_treatment.p	3WA_T_`chr:sry`.p	3WA_T_`chr:treatment`	3WA_T_`sry:treatment`.p	3WA_T_`chr:sry:treatment`.p	3WA_T_chr_FDR	3WA_T_sry_FDR	3WA_T_treatment_FDR	3WA_T_chr.sry_FDR	3WA_T_chr.treatment_FDR	3WA_T_sry.treatment_FDR	3WA_T_chr.sry.treatment_FDR	3WA_E_chr.p	3WA_E_sry.p	3WA_E_treatment.p	3WA_E_`chr:sry`.p	3WA_E_`chr:treatment`.p	3WA_E_`sry:treatment`.p	3WA_E_`chr:sry:treatment`,p	3WA_E_chr_FDR	3WA_E_sry_FDR	3WA_E_treatment_FDR	3WA_E_chr.sry_FDR	3WA_E_chr.treatment_FDR	3WA_E_sry.treatment_FDR	3WA_E_chr.sry.treatment_FDR	2WA_T_chr.p	2WA_T_sry.p	2WA_T_chr.sry.p	2WA_T_chr_FDR	2WA_T_sry_FDR	2WA_T_chr.sry_FDR	2WA_E_chr.p	2WA_E_sry.p	2WA_E_chr.sry.p	2WA_E_chr_FDR	2WA_E_sry_FDR	2WA_E_chr.sry_FDR	2WA_B_chr.p	2WA_B_sry.p	2WA_B_chr.sry.p	2WA_B_chr_FDR	2WA_B_sry_FDR	2WA_B_chr.sry_FDR	1WA_T_XYM_p	1WA_T_XYM_FDR	1WA_T_XYF_p
Xist	6.09e-15	0.147598	0.684685	0.796869	0.253916	0.209655	0.758736	2.86e-11	0.73293	0.874838	0.997582	0.953233	0.997331	0.959005	1.42385e-51	0.0673004	0.0114684	0.0261154	0.00356109	0.154854	0.127051	1.33842e-47	0.385746	0.0523061	0.998622	0.298877	0.946526	0.603919	2.32247e-06	0.183212	0.759368	0.00242518	0.807915	1	4.13953e-27	0.0322103	0.0243254	1.94475e-23	0.256699	0.999441	2.9787e-26	0.484879	0.447814	2.79878e-22	0.992988	0.808759	0.407084	0.772425	NA
Rps4x	0.713799	0.144395	0.177603	0.457217	0.702354	0.258226	0.593499	0.976953	0.73211	0.568039	0.997582	0.977609	0.997331	0.930233	0.399274	0.204064	0.198694	0.843258	0.861384	0.434203	0.969397	0.711906	0.632862	0.376862	0.998622	0.979177	0.955487	0.994579	0.950889	0.0948232	0.397395	0.999932	0.67962	1	0.469274	0.0882474	0.883845	0.825044	0.42631	0.999441	0.614307	0.827675	0.894016	0.840791	0.995606	0.969804	0.183978	0.764055	0.793331
Zfx	0.814461	0.230673	0.0264403	0.580072	0.251293	0.377572	0.956197	0.987845	0.812106	0.246909	0.997582	0.953233	0.997331	0.993642	0.993115	0.729865	0.000326897	0.528779	0.119249	0.742688	0.236317	0.997829	0.919792	0.0033761	0.998622	0.679974	0.981634	0.710159	0.580423	0.147144	0.668291	0.999932	0.753233	1	0.286691	0.404673	0.155939	0.744347	0.744235	0.999441	0.340093	0.810477	0.733406	0.724817	0.995606	0.918942	0.213904	0.772425	0.893409
Syap1	0.280512	0.202641	0.425123	0.8417	0.380135	0.0924434	0.311912	0.922239	0.796105	0.731093	0.997582	0.953233	0.997331	0.901424	0.0440379	0.0512643	0.746933	0.646642	0.630932	0.021931	0.75346	0.432387	0.333715	0.854434	0.998622	0.907984	0.664238	0.937462	0.869253	0.0179047	0.312755	0.999932	0.32389	1	0.0995862	0.00573933	0.90401	0.631727	0.0931377	0.999441	0.24282	0.72578	0.602508	0.676585	0.995606	0.877165	0.543885	0.852616	0.802119
Ddx3x	0.0193364	0.619437	0.548812	0.636768	0.209423	0.822886	0.596507	0.81875	0.938997	0.806367	0.997582	0.953233	0.997331	0.930484	0.00879757	0.416127	0.161835	0.49565	0.398793	0.979096	0.706518	0.292371	0.781811	0.329918	0.998622	0.83248	0.998721	0.924349	0.328411	0.863094	0.9791	0.999932	0.987566	1	0.145551	0.622216	0.825162	0.657456	0.86115	0.999441	0.0325629	0.695469	0.535421	0.432389	0.995606	0.847262	0.619335	0.901728	0.810598
Smc1a	0.313583	0.709558	0.0780132	0.782392	0.188907	0.304853	0.844831	0.922239	0.96307	0.407402	0.997582	0.953233	0.997331	0.978639	0.975407	0.268535	0.127642	0.758819	0.589719	0.675136	0.468987	0.992037	0.697837	0.284321	0.998622	0.8997	0.977826	0.832888	0.146543	0.415447	0.934999	0.999932	0.894881	1	0.784826	0.287375	0.53445	0.957383	0.676833	0.999441	0.745961	0.528037	0.692436	0.917288	0.995606	0.907472	0.864641	0.956884	0.5027
Sts	0.531728	0.608651	0.55584	0.355081	0.73378	0.694721	0.663303	0.947805	0.937056	0.809083	0.997582	0.979323	0.997331	0.940379	0.98553	0.752039	0.559926	0.564364	0.71778	0.242816	0.325756	0.994999	0.926277	0.714153	0.998622	0.940812	0.955487	0.774437	0.505619	0.893186	0.323382	0.999932	0.987566	1	0.849465	0.28903	0.263164	0.977124	0.676833	0.999441	0.836789	0.539082	0.75775	0.948631	0.995606	0.925854	0.80544	0.942998	0.580329
Prkx	0.834939	0.113804	0.27716	0.650978	0.0904782	0.606108	0.0516769	0.990768	0.675095	0.649431	0.997582	0.953233	0.997331	0.901424	0.196675	0.0725862	0.0328576	0.0252357	0.0261211	0.981638	0.0472963	0.591625	0.403187	0.112109	0.998622	0.488747	0.998721	0.449725	0.407083	0.281401	0.444787	0.999932	0.858964	1	0.569342	0.307936	0.717821	0.850753	0.686539	0.999441	0.00312806	0.131205	0.0006787	0.307558	0.990195	0.287704	0.670286	0.912379	0.0586817
Rbbp7	0.357404	0.901953	0.355241	0.898701	0.0470053	0.954337	0.363026	0.922239	0.991833	0.694667	0.997582	0.953233	0.997331	0.901424	0.261246	0.35605	0.629686	0.874146	0.0896062	0.559682	0.287162	0.641829	0.75024	0.76771	0.998622	0.639221	0.965957	0.759553	0.474168	0.967053	0.619682	0.999932	0.993156	1	0.672012	0.389335	0.471797	0.903256	0.735578	0.999441	0.0453214	0.966512	0.43658	0.442018	0.99683	0.808409	0.322947	0.772425	0.0419926
Hoxa13	0.313378	0.292209	0.297508	0.291466	0.290013	0.229791	0.259961	0.922239	0.849884	0.66334	0.997582	0.953233	0.997331	0.901424	0.174812	0.150545	0.921152	0.162336	0.88353	0.850689	0.871045	0.580788	0.564918	0.959348	0.998622	0.986266	0.990097	0.970243	0.340915	0.73452	0.707063	0.999932	0.982237	1	0.341166	0.344057	0.358265	0.754806	0.709122	0.999441	0.342487	0.271987	0.308469	0.72557	0.990195	0.759589	0.288574	0.772425	0.767908
Usp9x	0.197357	0.15325	0.879611	0.951168	0.288498	0.236087	0.141683	0.922239	0.743699	0.961242	0.997582	0.953233	0.997331	0.901424	0.164428	0.230673	0.168689	0.463102	0.163763	0.424918	0.285771	0.578414	0.667533	0.338904	0.998622	0.713995	0.955487	0.758357	0.880916	0.0882657	0.35654	0.999932	0.661694	1	0.99	0.153164	0.891755	0.997048	0.538598	0.999441	0.0974874	0.946424	0.256434	0.526208	0.996237	0.738286	0.691041	0.912379	0.330353
Slc25a42	0.557469	0.726577	0.943019	0.177577	0.838715	0.819582	0.857915	0.947805	0.967523	0.97819	0.997582	0.992434	0.997331	0.980869	0.879758	0.511829	0.658917	0.774165	0.512302	0.88047	0.618142	0.961426	0.833395	0.790936	0.998622	0.865992	0.994911	0.896272	0.683902	0.909315	0.12052	0.999932	0.987566	1	0.572898	0.611243	0.928584	0.85422	0.855412	0.999441	0.664811	0.749278	0.534269	0.872182	0.995606	0.846827	0.988411	0.995123	0.971927
Hif3a	0.127666	0.865182	0.768924	0.212023	0.950134	0.57885	0.654881	0.922239	0.989896	0.917733	0.997582	0.999856	0.997331	0.940065	0.297144	0.459852	0.350345	0.752566	0.426885	0.150762	0.0445362	0.661369	0.808574	0.532042	0.998622	0.842627	0.946526	0.442486	0.303997	0.808348	0.542755	0.999932	0.987566	1	0.761372	0.11526	0.093989	0.949464	0.47941	0.999441	0.265189	0.611313	0.241579	0.683811	0.995606	0.728867	0.870356	0.956884	0.991559
C3	0.554743	0.664525	0.678164	0.326386	0.0866982	0.159307	0.785704	0.947805	0.949109	0.872032	0.997582	0.953233	0.997331	0.962985	0.89949	0.295134	0.000922241	0.814064	0.097656	0.624094	0.512465	0.967305	0.714844	0.0076245	0.998622	0.650675	0.972637	0.851267	0.405074	0.332198	0.304656	0.999932	0.863455	1	0.287739	0.716942	0.700657	0.744347	0.914483	0.999441	0.129376	0.184668	0.725131	0.567068	0.990195	0.918115	0.709389	0.91794	0.0881641
Cobl	0.293454	0.00427751	0.290987	0.931677	0.550755	0.483495	0.782604	0.922239	0.115875	0.658972	0.997582	0.970444	0.997331	0.962759	0.457541	7.23437e-05	0.0355038	0.934227	0.369691	0.870568	0.684072	0.751247	0.00323824	0.118304	0.998622	0.82332	0.994128	0.916743	0.835641	0.129456	0.91092	0.999932	0.735723	1	0.654547	0.00565935	0.785482	0.893783	0.0924787	0.999441	0.156906	0.0108405	0.767808	0.597264	0.410717	0.927734	0.676757	0.912379	0.970143
Tle1	0.000980032	0.304246	3.96e-07	0.401004	0.771043	0.280795	0.224912	0.279959	0.856985	0.00014896	0.997582	0.981399	0.997331	0.901424	0.0270228	0.977583	0.00150154	0.65881	0.12996	0.788362	0.404554	0.362332	0.999044	0.0111754	0.998622	0.694188	0.984659	0.801277	0.00918348	0.11756	0.143066	0.999932	0.717894	1	0.4016	0.520753	0.298456	0.782188	0.812383	0.999441	0.0485809	0.963296	0.772934	0.4515	0.99683	0.929182	0.00358446	0.423452	0.00793554
Qdpr	0.848773	0.18323	0.624266	0.121443	0.791366	0.808864	0.725839	0.992312	0.777597	0.841546	0.997582	0.985642	0.997331	0.953068	0.273589	0.153887	0.117691	0.634629	0.707393	0.779452	0.0391308	0.648017	0.568833	0.269763	0.998622	0.936526	0.983492	0.422307	0.99719	0.341378	0.445092	0.999932	0.86485	1	0.246286	0.432814	0.265692	0.739637	0.761554	0.999441	0.71061	0.307488	0.0889321	0.903137	0.990195	0.580952	0.987552	0.994793	0.881068
Trappc2	0.470859	0.658592	0.638056	0.138465	0.629437	0.616431	0.613556	0.94577	0.946745	0.849296	0.997582	0.976856	0.997331	0.932594	0.34759	0.369443	0.309824	0.4295	0.297362	0.39937	0.382373	0.680539	0.75678	0.498178	0.998622	0.79552	0.955487	0.795736	0.884923	0.98053	0.208776	0.999932	0.996844	1	0.0257442	0.338928	0.243786	0.490263	0.707053	0.999441	0.313662	0.463851	0.446689	0.710847	0.990195	0.808759	0.809452	0.943738	0.369828
Skp2	0.375805	0.776059	0.30002	0.859987	0.974276	0.208114	0.280035	0.922239	0.978525	0.664793	0.997582	0.999856	0.997331	0.901424	0.87803	0.979389	0.0622153	0.609629	0.334698	0.25852	0.199317	0.96115	0.999044	0.174136	0.998622	0.809244	0.955487	0.681986	0.534714	0.308996	0.552128	0.999932	0.858964	1	0.378346	0.34703	0.366475	0.765291	0.711371	0.999441	0.535324	0.448505	0.353898	0.797128	0.990195	0.783128	0.0689803	0.741388	0.547384
Slc7a10	0.00390915	0.00530189	0.236973	0.570379	0.602062	0.872299	0.262367	0.675146	0.132547	0.614048	0.997582	0.976381	0.997331	0.901424	0.0568834	0.00111081	0.000206348	0.88233	0.37368	0.635273	0.136946	0.455445	0.027853	0.00233133	0.998622	0.824918	0.972637	0.619877	0.0110545	0.00314102	0.584507	0.999932	0.120487	1	0.560477	0.00769924	0.226235	0.847011	0.11011	0.999441	0.0690069	0.128727	0.352682	0.484699	0.990195	0.783128	0.290666	0.772425	0.861275
Psma3	0.360446	0.750476	0.756123	0.24845	0.779708	0.870397	0.471052	0.922239	0.973122	0.913332	0.997582	0.983105	0.997331	0.908066	0.691774	0.710089	0.607266	0.143716	0.784666	0.871164	0.716934	0.880479	0.912301	0.750006	0.998622	0.957672	0.994128	0.927636	0.383844	0.897367	0.712503	0.999932	0.987566	1	0.881738	0.911229	0.395648	0.97906	0.977026	0.999441	0.680667	0.732575	0.2225	0.883336	0.995606	0.707044	0.657408	0.912379	0.730516
Poln	0.700439	0.346683	0.0229695	0.626457	0.453549	0.635407	0.958672	0.972514	0.871791	0.22848	0.997582	0.961316	0.997331	0.9941	0.593804	0.157175	0.587926	0.100888	0.603242	0.826462	0.334345	0.821842	0.573894	0.735396	0.998622	0.902076	0.986791	0.77769	0.799662	0.759785	0.76833	0.999932	0.986918	1	0.874316	0.415822	0.08041	0.978544	0.749054	0.999441	0.352768	0.307933	0.687529	0.728326	0.990195	0.907085	0.354413	0.772425	0.563586
Actn2	0.55891	0.727078	0.834762	0.648038	0.327035	0.522182	0.12323	0.947805	0.967523	0.948478	0.997582	0.953233	0.997331	0.901424	0.0741487	0.240732	0.743744	0.612633	0.450212	0.105879	0.00811551	0.47917	0.678321	0.852377	0.998622	0.846435	0.904506	0.274874	0.83354	0.609306	0.566544	0.999932	0.944697	1	0.460711	0.0680436	0.149188	0.822486	0.376746	0.999441	0.0813392	0.660103	0.0282039	0.509549	0.995606	0.452174	0.916941	0.966181	0.35399
Dld	0.600395	0.651819	0.219455	0.454289	0.137709	0.982973	0.424643	0.948456	0.945347	0.603887	0.997582	0.953233	0.998939	0.901424	0.150362	0.316279	0.0452463	0.200079	0.566226	0.704452	0.68741	0.56431	0.726346	0.140517	0.998622	0.889059	0.981634	0.91837	0.479591	0.794103	0.992827	0.999932	0.987566	1	0.545915	0.342195	0.476022	0.845601	0.708308	0.999441	0.179933	0.816984	0.31886	0.620902	0.995606	0.766684	0.545618	0.853482	0.839164
Ak4	0.894899	0.116871	0.117481	0.472779	0.106005	0.295872	0.094593	0.993268	0.683929	0.479412	0.997582	0.953233	0.997331	0.901424	0.19482	0.10084	0.115597	0.729241	0.883533	0.444759	0.189766	0.591175	0.473974	0.266587	0.998622	0.986266	0.955487	0.675937	0.258032	0.739979	0.144608	0.999932	0.983155	1	0.52614	0.514168	0.316454	0.837751	0.80966	0.999441	0.186556	0.0516232	0.382222	0.627845	0.819079	0.790432	0.1198	0.741388	0.141115
Pdha1	0.41976	0.388901	0.000465605	0.33722	0.125889	0.439769	0.596329	0.930025	0.880248	0.0236578	0.997582	0.953233	0.997331	0.930484	0.763464	0.684112	0.0283917	0.950956	0.55997	0.66974	0.116522	0.917015	0.904579	0.10136	0.998895	0.885999	0.977763	0.587928	0.126082	0.199476	0.760141	0.999932	0.815208	1	0.860113	0.614427	0.232409	0.977124	0.856678	0.999441	0.721205	0.892686	0.269308	0.908716	0.995606	0.742088	0.148342	0.762531	0.450278
Ak1	0.285021	0.363534	0.89859	0.762929	0.969471	0.663929	0.153343	0.922239	0.873319	0.966952	0.997582	0.999856	0.997331	0.901424	0.447317	0.277846	0.643667	0.798774	0.0603614	0.842616	0.00463411	0.744472	0.705445	0.778496	0.998622	0.602671	0.989025	0.239344	0.594813	0.475595	0.374807	0.999932	0.925959	1	0.450856	0.655212	0.0730487	0.818757	0.881496	0.999441	0.0268048	0.375717	0.0201222	0.42584	0.990195	0.417368	0.419345	0.772425	0.51245
Igfbp3	0.559589	0.0833092	0.0489347	0.276514	0.0886374	0.922632	0.0853219	0.947805	0.604249	0.335511	0.997582	0.953233	0.997331	0.901424	0.305863	0.37524	0.0156423	0.344637	0.295584	0.67652	0.14504	0.667101	0.758704	0.0653209	0.998622	0.795217	0.978221	0.630831	0.236182	0.0814114	0.585215	0.999932	0.649151	1	0.9902	0.685071	0.772725	0.997048	0.89851	0.999441	0.189104	0.404371	0.124735	0.630396	0.990195	0.628948	0.258306	0.772425	0.051153
Phgdh	0.834957	0.0133923	0.0781944	0.250239	0.0319517	0.263091	0.770805	0.990768	0.247811	0.407895	0.997582	0.953233	0.997331	0.960183	0.419061	0.00177981	0.0561203	0.28133	0.00427943	0.416401	0.206067	0.724911	0.039458	0.162398	0.998622	0.318872	0.955487	0.68915	0.215734	0.0340589	0.602625	0.999932	0.457018	1	0.119721	0.000559049	0.927016	0.64761	0.0206804	0.999441	0.0702748	0.151557	0.16414	0.485184	0.990195	0.652669	0.506447	0.826094	0.436686
Kcnj8	0.579577	0.584355	0.0839831	0.864938	0.994191	0.348798	0.859824	0.948409	0.933063	0.420139	0.997582	0.999899	0.997331	0.981201	0.882016	0.0257929	3.95847e-05	0.570695	0.272533	0.141667	0.555716	0.96185	0.23562	0.000618101	0.998622	0.780087	0.946526	0.872183	0.69695	0.293484	0.795599	0.999932	0.858964	1	0.353511	0.00219534	0.243592	0.758563	0.050932	0.999441	0.704651	0.765509	0.995974	0.899212	0.995606	0.998048	0.321239	0.772425	0.710574
Cnksr2	0.193782	0.895998	0.0546671	0.691334	0.341613	0.798249	0.36559	0.922239	0.991762	0.350997	0.997582	0.953233	0.997331	0.901424	0.118039	0.934325	0.66886	0.856867	0.436101	0.828121	0.133591	0.5337	0.997997	0.799234	0.998622	0.84384	0.987624	0.613161	0.782567	0.778002	0.757274	0.999932	0.987566	1	0.548111	0.807345	0.263004	0.84645	0.955272	0.999441	0.0993061	0.94954	0.318147	0.526208	0.996237	0.766454	0.0675836	0.741388	0.242357
Pak1	0.742603	9.71e-05	0.767648	0.636919	0.584406	0.323276	0.789945	0.980265	0.00543787	0.917654	0.997582	0.974529	0.997331	0.962985	0.466577	9.48548e-05	0.645413	0.603801	0.991542	0.270365	0.516046	0.757351	0.00414714	0.780106	0.998622	0.99885	0.955487	0.853211	0.767172	0.0343022	0.638396	0.999932	0.457018	1	0.855866	0.0381651	0.470699	0.977124	0.278823	0.999441	0.335163	0.000574999	0.876241	0.722089	0.0568705	0.966792	0.687016	0.912379	0.348158
Abcc9	0.787974	0.309019	0.326664	0.577791	0.877058	0.586128	0.0294143	0.987567	0.858382	0.681036	0.997582	0.995579	0.997331	0.901424	0.750324	0.491997	0.044669	0.866601	0.867081	0.768798	0.00614088	0.910623	0.823499	0.139684	0.998622	0.979703	0.982957	0.253798	0.901646	0.299278	0.295408	0.999932	0.858964	1	0.855769	0.422342	0.0711005	0.977124	0.753575	0.999441	0.784732	0.738878	0.0443442	0.933024	0.995606	0.490404	0.693198	0.912379	0.269468
Actr10	0.752946	0.377271	0.660379	0.124941	0.669128	0.998014	0.144447	0.980903	0.876116	0.862281	0.997582	0.977609	0.999183	0.901424	0.87857	0.752058	0.392165	0.258666	0.742048	0.470906	0.0216558	0.961415	0.926277	0.567306	0.998622	0.94862	0.957632	0.35425	0.651176	0.5122	0.89398	0.999932	0.931796	1	0.762808	0.756335	0.370005	0.949595	0.934581	0.999441	0.966305	0.536841	0.0417229	0.984858	0.995606	0.485478	0.43865	0.78009	0.512578
Asah1	0.654664	0.837933	0.556495	0.192482	0.137837	0.799519	0.806072	0.963617	0.985535	0.809083	0.997582	0.953233	0.997331	0.967698	0.798384	0.682937	0.00411171	0.687716	0.120727	0.587643	0.635087	0.930425	0.904043	0.0242472	0.998622	0.683223	0.968564	0.902457	0.574396	0.744844	0.254342	0.999932	0.984454	1	0.442158	0.603127	0.905523	0.812381	0.851199	0.999441	0.142868	0.657876	0.52602	0.587251	0.995606	0.843856	0.254684	0.772425	0.461003
Acat1	0.805736	0.368429	0.805936	0.540131	0.470927	0.274399	0.350938	0.987845	0.873482	0.9352	0.997582	0.963871	0.997331	0.901424	0.986102	0.754989	0.520647	0.608516	0.386555	0.983634	0.371004	0.9951	0.927558	0.683531	0.998622	0.828642	0.998721	0.792424	0.781669	0.154207	0.843613	0.999932	0.763406	1	0.554606	0.85359	0.851005	0.846464	0.965921	0.999441	0.534564	0.872206	0.297494	0.797044	0.995606	0.756326	0.41322	0.772425	0.241206
Scin	0.233985	0.0077277	0.0894521	0.377628	0.772352	0.0849123	0.966808	0.922239	0.174898	0.431488	0.997582	0.981599	0.997331	0.996272	0.390533	0.0516002	0.0638168	0.315371	0.343013	0.8976	0.416572	0.706423	0.334742	0.177112	0.998622	0.810148	0.995417	0.80821	0.435279	0.0129243	0.611931	0.999932	0.285123	1	0.0702154	2.0245e-08	0.252328	0.600313	9.0582e-06	0.999441	0.319128	0.388859	0.407138	0.711567	0.990195	0.798814	0.202169	0.764055	0.102589
Slc41a2	0.923405	0.109195	0.763427	0.803889	0.126942	0.862693	0.107167	0.995216	0.666475	0.915718	0.997582	0.953233	0.997331	0.901424	0.288138	0.264726	0.131192	0.201908	0.136491	0.170943	0.14062	0.65698	0.693957	0.289484	0.998622	0.695259	0.955487	0.626756	0.370541	0.267713	0.370063	0.999932	0.858964	1	0.297581	0.433777	0.86152	0.744474	0.762539	0.999441	0.272449	0.204181	0.178282	0.688624	0.990195	0.668408	0.0754289	0.741388	0.372393
Prep	0.388095	0.678017	0.32953	0.420621	0.391808	0.372954	0.360789	0.923029	0.950255	0.682586	0.997582	0.953233	0.997331	0.901424	0.35065	0.512757	0.33448	0.449968	0.478609	0.451104	0.316422	0.681502	0.834	0.518488	0.998622	0.856086	0.955487	0.771441	0.884329	0.0142634	0.796641	0.999932	0.296564	1	0.289765	0.208517	0.142554	0.744347	0.606854	0.999441	0.403873	0.54853	0.412221	0.751634	0.995606	0.802001	0.537798	0.850103	0.69355
Ctps2	0.442208	0.395298	0.239734	0.570149	0.243129	0.420722	0.320006	0.939485	0.883019	0.614048	0.997582	0.953233	0.997331	0.901424	0.459743	0.853205	0.724262	0.248736	0.119084	0.71455	0.149737	0.752601	0.971078	0.838948	0.998622	0.679974	0.981634	0.63423	0.333316	0.376499	0.426211	0.999932	0.875307	1	0.593052	0.785334	0.948694	0.865277	0.945419	0.999441	0.152192	0.825614	0.0894277	0.592381	0.995606	0.58132	0.239061	0.772425	0.284292
Gsc	0.125534	0.221435	0.791707	0.272112	0.925181	0.862969	0.922146	0.922239	0.806437	0.930139	0.997582	0.999856	0.997331	0.987466	0.150644	0.185142	0.973338	0.239773	0.985543	0.80433	0.964687	0.56431	0.607659	0.986775	0.998622	0.998301	0.985168	0.993215	0.247206	0.305564	0.448495	0.999932	0.858964	1	0.305049	0.243967	0.385091	0.744474	0.646451	0.999441	0.322814	0.487701	0.433842	0.713265	0.993316	0.80714	0.0593705	0.741388	0.993908
Hcfc1	0.261226	0.973068	0.603514	0.94051	0.299836	0.862216	0.679826	0.922239	0.995984	0.829027	0.997582	0.953233	0.997331	0.942679	0.171796	0.517346	0.536044	0.864645	0.320986	0.714094	0.748109	0.580329	0.834361	0.695681	0.998622	0.803747	0.981634	0.934943	0.915488	0.887918	0.829652	0.999932	0.987566	1	0.758533	0.472235	0.965899	0.948822	0.787116	0.999441	0.138476	0.916211	0.718292	0.581896	0.995606	0.915376	0.947002	0.977672	0.612085
Suclg1	0.3021	0.492244	0.657719	0.449263	0.569492	0.543549	0.299948	0.922239	0.917345	0.859644	0.997582	0.972646	0.997331	0.901424	0.465116	0.40282	0.15011	0.608812	0.678531	0.0466231	0.16482	0.756813	0.771909	0.315597	0.998622	0.925375	0.80468	0.647061	0.336777	0.962306	0.896261	0.999932	0.992054	1	0.533983	0.103646	0.618204	0.839917	0.459197	0.999441	0.701538	0.22709	0.0935768	0.896945	0.990195	0.586948	0.804401	0.942998	0.310345
Ccnd2	0.170783	0.00280322	0.189506	0.799057	0.100353	0.656698	0.0973847	0.922239	0.0844561	0.580095	0.997582	0.953233	0.997331	0.901424	0.783134	0.000951414	0.151202	0.367672	0.356772	0.660826	0.21453	0.925621	0.0246372	0.316829	0.998622	0.817167	0.975865	0.693076	0.0398069	0.00944605	0.273835	0.999932	0.241891	1	0.504207	0.00142231	0.754744	0.834944	0.0380176	0.999441	0.906403	0.0814184	0.215401	0.961553	0.933133	0.697445	0.68782	0.912379	0.0146482
Mtmr4	0.34097	0.455257	0.334741	0.335688	0.278187	0.469793	0.39838	0.922239	0.90969	0.684609	0.997582	0.953233	0.997331	0.901424	0.151299	0.465692	0.0191404	0.721001	0.0637688	0.323363	0.347759	0.564937	0.810205	0.0757878	0.998622	0.608905	0.955487	0.780247	0.315077	0.427425	0.354915	0.999932	0.90259	1	0.749928	0.265296	0.741037	0.944769	0.663161	0.999441	0.0574907	0.689927	0.388	0.466947	0.995606	0.795077	0.471653	0.799345	0.515045
Hs3st3a1	0.505273	0.688735	0.60742	0.435207	0.570892	0.0816269	0.401459	0.947805	0.954461	0.830992	0.997582	0.972646	0.997331	0.901424	0.125763	0.142142	0.944804	0.109784	0.741241	0.686091	0.651914	0.538385	0.55235	0.972515	0.998622	0.948498	0.980287	0.906883	0.942068	0.211657	0.985239	0.999932	0.825717	1	0.28081	0.408087	0.374964	0.744347	0.745574	0.999441	0.285458	0.206945	0.162574	0.691408	0.990195	0.649465	0.407003	0.772425	0.552413
Gdap1	0.457333	0.193026	0.870382	0.313257	0.108921	0.884459	0.0314908	0.945534	0.78924	0.958032	0.997582	0.953233	0.997331	0.901424	0.28257	0.198417	0.0147606	0.477925	0.0460572	0.56519	0.0016906	0.653422	0.626145	0.0626694	0.998622	0.573598	0.968564	0.236007	0.590352	0.505971	0.51212	0.999932	0.931186	1	0.474912	0.628313	0.0948638	0.826149	0.865634	0.999441	0.0406964	0.242832	0.00949319	0.435212	0.990195	0.386631	0.645166	0.912379	0.065423
Txnrd2	0.707348	0.164245	0.445615	0.248268	0.695285	0.591192	0.45074	0.975081	0.759837	0.74693	0.997582	0.977609	0.997331	0.902959	0.678075	0.227569	0.00149824	0.491861	0.729009	0.91615	0.130414	0.87266	0.664125	0.0111596	0.998622	0.946243	0.996665	0.610201	0.542941	0.169985	0.719594	0.999932	0.793245	1	0.521269	0.280799	0.466685	0.837376	0.673387	0.999441	0.93764	0.59637	0.212109	0.971333	0.995606	0.694622	0.834835	0.952174	0.85686
Ephb2	0.0925391	0.233182	0.0870821	0.56361	0.652361	0.102227	0.207483	0.922239	0.81335	0.427007	0.997582	0.977609	0.997331	0.901424	0.16336	0.107223	0.0170251	0.710636	0.909005	0.0973556	0.640156	0.577069	0.486534	0.0695808	0.998622	0.9891	0.899663	0.904634	0.0991872	0.764506	0.183109	0.999932	0.986918	1	0.184007	0.946592	0.974344	0.692817	0.984523	0.999441	0.460775	0.078813	0.613029	0.788694	0.925659	0.880493	0.292352	0.772425	0.236675
Prdx2	0.569734	0.443872	0.64343	0.0729001	0.106417	0.560144	0.471486	0.948044	0.904148	0.852585	0.997582	0.953233	0.997331	0.908066	0.109307	0.615893	0.000288689	0.0686009	0.0866587	0.992381	0.0445781	0.522315	0.87506	0.00304381	0.998622	0.632924	0.999497	0.442486	0.468142	0.39639	0.426875	0.999932	0.884555	1	0.228082	0.525832	0.132569	0.729508	0.81388	0.999441	0.106037	0.995124	0.0839617	0.533839	0.998647	0.575003	0.185477	0.764055	0.992318
Mrpl12	0.409029	0.148992	0.464536	0.204772	0.692478	0.611316	0.425169	0.925294	0.735957	0.75975	0.997582	0.977609	0.997331	0.901424	0.35337	0.155087	0.000122893	0.533869	0.0327689	0.220442	0.127547	0.682665	0.570819	0.00155686	0.998622	0.508043	0.955487	0.604894	0.831951	0.602078	0.846251	0.999932	0.942061	1	0.0557479	0.829432	0.585045	0.580786	0.960187	0.999441	0.326274	0.152872	0.159311	0.71678	0.990195	0.646331	0.392821	0.772425	0.750276
Psmb1	0.675072	0.29037	0.162292	0.139014	0.840895	0.322827	0.837669	0.969716	0.849884	0.552934	0.997582	0.992473	0.997331	0.977551	0.762001	0.548524	0.0314001	0.261407	0.922864	0.654899	0.417052	0.916195	0.84707	0.108835	0.998622	0.990848	0.975314	0.80828	0.715478	0.177715	0.373894	0.999932	0.805072	1	0.829822	0.475297	0.765452	0.970291	0.789305	0.999441	0.826426	0.988916	0.227922	0.94551	0.997863	0.713376	0.902297	0.959983	0.257793
Plekha6	0.180509	9.04e-12	0.966583	0.91284	0.19841	0.910461	0.224354	0.922239	4.47e-09	0.985988	0.997582	0.953233	0.997331	0.901424	0.134749	9.80469e-08	0.00378251	0.0338894	0.166599	0.00289087	0.28046	0.545427	1.16663e-05	0.0227483	0.998622	0.714642	0.251612	0.754588	0.170129	6.21548e-07	0.355703	0.999932	0.000243388	1	0.0308744	0.0236045	0.0377181	0.50421	0.21808	0.999441	0.633082	4.06455e-06	0.431973	0.854855	0.00146887	0.806486	0.407084	0.772425	0.909402
Hibadh	0.174676	0.0264332	0.000932039	0.585981	0.526193	0.659573	0.274435	0.922239	0.355138	0.0366576	0.997582	0.968789	0.997331	0.901424	0.417482	0.0187441	2.49327e-06	0.0828071	0.414579	0.589991	0.929719	0.723528	0.195149	6.83287e-05	0.998622	0.838296	0.968564	0.981627	0.719199	0.253694	0.754825	0.999932	0.858964	1	0.799969	0.264625	0.237942	0.962791	0.662514	0.999441	0.110833	0.0679959	0.269972	0.53874	0.896057	0.742088	0.270356	0.772425	0.0503749
Senp2	0.886702	0.45299	0.0413178	0.675103	0.942118	0.730672	0.557623	0.993268	0.908678	0.306772	0.997582	0.999856	0.997331	0.925545	0.248675	0.0772317	0.00400836	0.215741	0.302544	0.737917	0.78685	0.634498	0.414476	0.0237727	0.998622	0.797288	0.981634	0.947745	0.991393	0.787074	0.939366	0.999932	0.987566	1	0.144819	0.0586013	0.378454	0.657456	0.348306	0.999441	0.805625	0.317458	0.345043	0.938066	0.990195	0.782136	0.316476	0.772425	0.236077
Hipk2	0.00917368	0.0243832	0.837989	0.784671	0.530344	0.750032	0.709165	0.695699	0.343117	0.949591	0.997582	0.968789	0.997331	0.951628	0.0799258	0.0101648	2.18005e-05	0.777222	0.0739785	0.455031	0.985219	0.490406	0.135917	0.000385196	0.998622	0.627513	0.9557	0.996701	0.0872822	0.0880112	0.543012	0.999932	0.661469	1	0.790626	0.0649405	0.812626	0.95918	0.366981	0.999441	0.05551	0.137685	0.937018	0.464032	0.990195	0.985143	0.832726	0.951397	0.795267
Ift172	0.109815	0.408429	0.257702	0.355201	0.0421825	0.828101	0.716329	0.922239	0.887756	0.631163	0.997582	0.953233	0.997331	0.951726	0.0504914	0.0197955	0.221366	0.902433	0.0310596	0.367105	0.725677	0.443576	0.201165	0.404597	0.998622	0.505416	0.955487	0.927636	0.777609	0.72621	0.3524	0.999932	0.978845	1	0.757804	0.0141892	0.975495	0.948491	0.160628	0.999441	0.0184322	0.531598	0.707684	0.42036	0.995606	0.911065	0.738368	0.928096	0.531102
Mccc1	0.0496879	0.126692	0.272014	0.502279	0.0296968	0.766016	0.667235	0.922239	0.698816	0.644755	0.997582	0.953233	0.997331	0.941372	0.0265988	0.0924622	0.00329571	0.306993	0.0754778	0.834867	0.849782	0.360212	0.456575	0.0204314	0.998622	0.627513	0.988474	0.966363	0.853517	0.139968	0.82591	0.999932	0.740249	1	0.739669	0.188494	0.522421	0.938545	0.582634	0.999441	0.0198805	0.541924	0.532975	0.424822	0.995606	0.846417	0.246952	0.772425	0.832355
Trim45	0.142804	0.819434	0.0741788	0.257518	0.0667811	0.722824	0.150231	0.922239	0.985454	0.400532	0.997582	0.953233	0.997331	0.901424	0.0509181	0.023656	0.330737	0.414653	0.138124	0.146565	0.0632502	0.445652	0.222145	0.515552	0.998622	0.695259	0.946526	0.493464	0.804566	0.832691	0.86033	0.999932	0.987566	1	0.662835	0.00151521	0.367972	0.897665	0.0397678	0.999441	0.0582334	0.772469	0.130848	0.469305	0.995606	0.63513	0.364216	0.772425	0.351467
F8	0.773374	0.395697	0.281544	0.713978	0.876168	0.218457	0.563744	0.985369	0.883019	0.652977	0.997582	0.995164	0.997331	0.925886	0.055593	0.251974	0.253793	0.816252	0.187069	0.199159	0.47312	0.452954	0.683961	0.44103	0.998622	0.726933	0.955487	0.833458	0.899381	0.832088	0.895803	0.999932	0.987566	1	0.0211638	0.90321	0.784685	0.483281	0.975288	0.999441	0.773775	0.130173	0.48927	0.928696	0.990195	0.825199	0.139807	0.749285	0.842227
Loxl1	0.122548	0.336021	0.00361562	0.948977	0.22811	0.136786	0.96503	0.922239	0.867508	0.0843346	0.997582	0.953233	0.997331	0.996157	0.0288585	0.604781	3.69123e-05	0.366962	0.746646	0.055141	0.44544	0.370988	0.869124	0.000586108	0.998622	0.949114	0.831648	0.822297	0.83395	0.772106	1	0.999932	0.987566	1	0.18344	0.280596	0.243739	0.692817	0.673387	0.999441	0.0773182	0.103055	0.924123	0.499858	0.990195	0.980622	0.0317971	0.684297	0.265142
Cab39l	0.206826	0.013222	0.393377	0.47252	0.0572038	0.97739	0.14967	0.922239	0.246112	0.710328	0.997582	0.953233	0.997331	0.901424	0.0292754	0.423179	1.43953e-05	0.317903	0.0746023	0.0551928	0.108279	0.373126	0.787537	0.000279579	0.998622	0.627513	0.831648	0.576864	0.862264	0.0562877	0.911458	0.999932	0.555664	1	0.517433	0.615726	0.727505	0.836633	0.857344	0.999441	0.0312165	0.0442065	0.0887745	0.432389	0.775936	0.580952	0.752412	0.934603	0.333339
Slc38a3	0.282548	0.946312	0.263006	0.482316	0.219097	0.291846	0.187665	0.922239	0.993072	0.636957	0.997582	0.953233	0.997331	0.901424	0.31385	0.0538035	0.116945	0.437113	0.0713986	0.731325	0.0841278	0.6724	0.342812	0.268641	0.998622	0.627513	0.981634	0.538916	0.957956	0.516251	0.729023	0.999932	0.932406	1	0.477025	0.100469	0.560785	0.826831	0.452619	0.999441	0.0661746	0.362459	0.0989547	0.480791	0.990195	0.59287	0.304453	0.772425	0.2643
Dhrsx	0.559088	0.698404	0.216808	0.731214	0.938551	0.230409	0.555046	0.947805	0.958954	0.60195	0.997582	0.999856	0.997331	0.925545	0.336355	0.246019	0.827592	0.674367	0.570047	0.00963383	0.921685	0.676195	0.681631	0.904893	0.998622	0.890551	0.462031	0.979544	0.586523	0.548097	0.481276	0.999932	0.933345	1	0.269602	0.00669312	0.681495	0.744347	0.101597	0.999441	0.764862	0.310099	0.851075	0.925646	0.990195	0.960888	0.728271	0.923689	0.406307
Mmp3	0.425266	0.815764	0.373502	0.170561	0.501574	0.0169055	0.432721	0.93134	0.985121	0.702144	0.997582	0.965552	0.997331	0.901424	0.0236898	0.00495189	0.0176634	0.523316	0.0761862	0.859314	0.0989557	0.347671	0.0837799	0.0715022	0.998622	0.628886	0.991497	0.564942	0.345555	0.0856606	0.663811	0.999932	0.657495	1	0.00355639	0.0666361	0.528609	0.355488	0.372464	0.999441	0.930143	0.0929159	0.124349	0.969179	0.964683	0.628948	0.0493986	0.741388	0.242628
Il3ra	0.685859	0.0859786	0.118339	0.806539	0.535486	0.970106	0.472279	0.971533	0.612272	0.481345	0.997582	0.970271	0.997331	0.908066	0.774724	0.188625	0.000356949	0.869779	0.621641	0.573629	0.652975	0.922555	0.612191	0.00360399	0.998622	0.905791	0.968564	0.906883	0.485095	0.285426	0.553666	0.999932	0.858964	1	0.504537	0.494017	0.839556	0.834944	0.801412	0.999441	0.768314	0.166822	0.671522	0.926601	0.990195	0.907056	0.291451	0.772425	0.322475
Clic6	0.741549	2.68e-06	0.0703583	0.485531	0.480268	0.102953	0.652371	0.980265	0.000252333	0.39297	0.997582	0.965358	0.997331	0.940065	0.146865	9.74749e-07	0.0151429	0.074266	0.980789	0.00202079	0.761562	0.559824	8.81023e-05	0.0636884	0.998622	0.998173	0.202078	0.941032	0.997781	0.0144292	0.874326	0.999932	0.29869	1	0.155528	0.0489561	0.138687	0.666412	0.325312	0.999441	0.557299	2.04199e-05	0.350212	0.805952	0.00467965	0.783128	0.0676521	0.741388	0.0138518
Kcnk2	0.750564	0.854053	0.0447822	0.754143	0.544497	0.299742	0.624301	0.980788	0.987825	0.321829	0.997582	0.970282	0.997331	0.934426	0.0802906	0.963916	0.0570418	0.410149	0.46789	0.339397	0.093267	0.491634	0.999044	0.164426	0.998622	0.849082	0.955487	0.558059	0.891923	0.484247	0.930369	0.999932	0.927229	1	0.156985	0.599669	0.14593	0.667907	0.849697	0.999441	0.298497	0.327401	0.362783	0.699769	0.990195	0.784875	0.163161	0.764055	0.96375
Dpep1	0.745185	0.264336	7.7e-05	0.317429	0.517595	0.334605	0.655664	0.980265	0.834934	0.00770238	0.997582	0.968789	0.997331	0.940065	0.548774	0.400613	0.00128591	0.69537	0.331667	0.094727	0.262955	0.799635	0.770646	0.00996502	0.998622	0.809244	0.899663	0.741133	0.500406	0.948801	0.630899	0.999932	0.98944	1	0.20023	0.368898	0.622616	0.704462	0.721253	0.999441	0.780913	0.165598	0.330848	0.932452	0.990195	0.773488	0.000581363	0.171147	0.357673
Ada	0.393179	0.772537	0.62829	0.679157	0.529621	0.972807	0.905592	0.923029	0.978525	0.843704	0.997582	0.968789	0.997331	0.986735	0.287033	0.473625	0.0816484	0.997824	0.278577	0.409652	0.676291	0.656314	0.814056	0.21033	0.999946	0.784139	0.955487	0.914228	0.306441	0.840213	0.833155	0.999932	0.987566	1	0.134655	0.308262	0.828987	0.653859	0.686539	0.999441	0.906673	0.887329	0.712719	0.961553	0.995606	0.91306	0.881417	0.956884	0.999692
Atp1a2	0.196608	0.359177	0.449138	0.665471	0.878619	0.658569	0.71431	0.922239	0.873319	0.749816	0.997582	0.995579	0.997331	0.951726	0.585423	0.21145	0.408191	0.694213	0.1999	0.912334	0.760709	0.816344	0.643309	0.581892	0.998622	0.74271	0.996665	0.941032	0.257878	0.672768	0.528403	0.999932	0.962063	1	0.201222	0.514388	0.68786	0.704462	0.80966	0.999441	0.469857	0.404166	0.985025	0.791909	0.990195	0.993827	0.57048	0.871489	0.676237
Adra1d	0.7313	0.586452	0.136868	0.940822	0.197119	0.188012	0.440859	0.979206	0.933399	0.513777	0.997582	0.953233	0.997331	0.901424	0.365886	0.293771	0.00744768	0.619026	0.38683	0.320834	0.696203	0.689936	0.714844	0.0377856	0.998622	0.82867	0.955487	0.921504	0.318797	0.39717	0.389114	0.999932	0.885763	1	0.371812	0.0684693	0.358041	0.760761	0.376905	0.999441	0.36052	0.326683	0.690489	0.729522	0.990195	0.907085	0.29639	0.772425	0.148386
Gtpbp6	0.281487	0.0677175	0.59288	0.193082	0.480036	0.743977	0.894276	0.922239	0.558863	0.823932	0.997582	0.965358	0.997331	0.985006	0.883557	0.0527708	0.00233364	0.611799	0.0568325	0.292961	0.276742	0.96228	0.338598	0.0156911	0.998622	0.599111	0.955487	0.75395	0.817245	0.284659	0.391855	0.999932	0.858964	1	0.0900943	0.578046	0.707228	0.621166	0.839592	0.999441	0.196392	0.150355	0.327513	0.636899	0.990195	0.772598	0.837831	0.952554	0.854817
Tlcd4	0.573026	0.000106605	0.0406961	0.671717	0.173468	0.147309	0.364577	0.948409	0.00575913	0.30579	0.997582	0.953233	0.997331	0.901424	0.50963	0.000144848	0.565309	0.409147	0.143068	0.118144	0.525964	0.783277	0.00577242	0.718386	0.998622	0.695259	0.921917	0.856856	0.329787	8.15004e-06	0.314318	0.999932	0.00212761	1	0.436898	1.27956e-06	0.803202	0.809219	0.000174243	0.999441	0.415528	0.0110553	0.515761	0.75841	0.417173	0.83828	0.168215	0.764055	0.023522
Galnt2	0.414669	0.256492	0.3021	0.621591	0.126734	0.918619	0.694864	0.928767	0.828335	0.666596	0.997582	0.953233	0.997331	0.947729	0.167967	0.463045	0.00696865	0.857581	0.0688853	0.497745	0.855136	0.580188	0.808574	0.036111	0.998622	0.621004	0.959946	0.968009	0.660534	0.377405	0.500095	0.999932	0.875587	1	0.432888	0.114264	0.107066	0.805834	0.477804	0.999441	0.144169	0.399337	0.953926	0.588075	0.990195	0.988378	0.600275	0.890259	0.984799
Prelp	0.0687618	0.928302	0.371026	0.499562	0.363949	0.115872	0.283921	0.922239	0.992776	0.700978	0.997582	0.953233	0.997331	0.901424	0.0186091	0.28082	0.205203	0.80734	0.772439	0.0168164	0.831658	0.330672	0.707547	0.384628	0.998622	0.955222	0.61449	0.96019	0.25969	0.0882916	0.0691492	0.999932	0.661694	1	0.0191527	0.000846206	0.903175	0.477345	0.0261544	0.999441	0.153742	0.386626	0.789423	0.593737	0.990195	0.935126	0.0361551	0.717659	0.673474
Ccn5	0.319962	0.333899	0.0375434	0.444149	0.390056	0.391312	0.218582	0.922239	0.86727	0.295359	0.997582	0.953233	0.997331	0.901424	0.276523	0.0198778	6.44089e-05	0.402613	0.599938	0.809346	0.227115	0.64918	0.201565	0.000931452	0.998622	0.900908	0.985259	0.70245	0.753323	0.779118	0.363475	0.999932	0.987566	1	0.51736	4.04641e-05	0.429575	0.836633	0.00279559	0.999441	0.350535	0.395305	0.328477	0.728074	0.990195	0.772598	0.185476	0.764055	0.0223409
Angptl7	0.725714	0.661943	0.392172	0.884402	0.527147	0.474966	0.381658	0.978725	0.948405	0.709745	0.997582	0.968789	0.997331	0.901424	0.108092	0.59132	0.775399	0.726244	0.544087	0.0827696	0.28469	0.521355	0.86271	0.872377	0.998622	0.879092	0.888297	0.757669	0.869223	0.885991	0.469042	0.999932	0.987566	1	0.10111	0.0896851	0.298377	0.631727	0.430379	0.999441	0.516688	0.420594	0.608143	0.795049	0.990195	0.878674	0.122563	0.741388	0.99614
Glipr2	0.545067	0.752463	0.417665	0.834122	0.943547	0.717403	0.497145	0.947805	0.973122	0.726595	0.997582	0.999856	0.997331	0.913567	0.557074	0.721298	5.97343e-05	0.292878	0.883855	0.46434	0.938968	0.80308	0.915925	0.000877348	0.998622	0.986361	0.957632	0.986289	0.757641	0.998881	0.782311	0.999932	1	1	0.745912	0.707221	0.394436	0.942268	0.909654	0.999441	0.583558	0.581094	0.470815	0.822426	0.995606	0.81362	0.657522	0.912379	0.722018
Edem2	0.98195	0.527679	0.226489	0.348938	0.743313	0.78664	0.567838	0.998481	0.924579	0.608382	0.997582	0.979323	0.997331	0.925886	0.512385	0.727073	0.502805	0.911389	0.839571	0.243639	0.125174	0.784561	0.919441	0.668304	0.998622	0.972209	0.955487	0.600502	0.788404	0.792252	0.767323	0.999932	0.987566	1	0.512714	0.29069	0.266158	0.834944	0.678253	0.999441	0.794249	0.54962	0.298893	0.9361	0.995606	0.756326	0.79084	0.942998	0.580306
Trim35	0.526307	0.979261	0.0532247	0.630642	0.0749118	0.962206	0.714694	0.947805	0.996541	0.347681	0.997582	0.953233	0.997331	0.951726	0.322291	0.531838	0.025581	0.584132	0.128957	0.628063	0.807576	0.67248	0.841205	0.0942245	0.998622	0.692732	0.972637	0.953092	0.45533	0.938634	0.908746	0.999932	0.988291	1	0.739986	0.586862	0.753232	0.938638	0.842885	0.999441	0.0862204	0.89289	0.531823	0.517338	0.995606	0.846115	0.792316	0.942998	0.993828
Adcy2	0.165157	0.865839	0.482926	0.970252	0.620459	0.318529	0.550851	0.922239	0.989896	0.771883	0.997582	0.976655	0.997331	0.924282	0.862584	0.0737031	0.307677	0.302928	0.0739931	0.871315	0.715261	0.954764	0.405669	0.496082	0.998622	0.627513	0.994128	0.927636	0.486061	0.546844	0.691546	0.999932	0.933345	1	0.137456	0.130309	0.174764	0.657331	0.508674	0.999441	0.217482	0.436814	0.664419	0.656224	0.990195	0.906973	0.255008	0.772425	0.418041
Bcl6	0.696477	0.203155	0.0569905	0.444318	0.768285	0.262134	0.342152	0.972514	0.796105	0.356635	0.997582	0.981399	0.997331	0.901424	0.71419	0.23133	0.871686	0.254774	0.572958	0.118182	0.413715	0.891183	0.667533	0.931611	0.998622	0.892102	0.921917	0.807455	0.907552	0.874436	0.279856	0.999932	0.987566	1	0.971634	0.865751	0.149008	0.991472	0.96855	0.999441	0.639787	0.0743355	0.833823	0.857707	0.913463	0.95451	0.272933	0.772425	0.337959
Cebpg	0.317054	0.605623	0.0720127	0.597668	0.338036	0.0293015	0.746688	0.922239	0.937056	0.39664	0.997582	0.953233	0.997331	0.9573	0.823287	0.190827	0.898814	0.861598	0.224526	0.280004	0.678867	0.940682	0.61557	0.946429	0.998622	0.754197	0.955487	0.91576	0.943681	0.146046	0.850225	0.999932	0.751201	1	0.463244	0.918198	0.922674	0.823032	0.978133	0.999441	0.248614	0.115729	0.626701	0.678669	0.990195	0.88765	0.0897175	0.741388	0.350785
Stim1	0.69335	0.479938	0.0511939	0.428376	0.591682	0.604581	0.615722	0.972514	0.914906	0.341314	0.997582	0.975595	0.997331	0.932778	0.897048	0.865942	0.816594	0.269363	0.242619	0.695147	0.638532	0.966162	0.975885	0.898196	0.998622	0.761836	0.980494	0.90389	0.933301	0.493694	0.83646	0.999932	0.930711	1	0.560849	0.660304	0.617518	0.847011	0.884412	0.999441	0.336459	0.906283	0.20701	0.722752	0.995606	0.692375	0.547706	0.853599	0.357903
Ppp1r1a	0.908794	0.64009	0.0335244	0.583958	0.72504	0.302728	0.59448	0.993361	0.944124	0.278436	0.997582	0.977668	0.997331	0.930484	0.718053	0.413726	0.000201488	0.752473	0.629089	0.421026	0.240532	0.893054	0.780887	0.00228743	0.998622	0.90737	0.955487	0.715279	0.836345	0.678351	0.952302	0.999932	0.962863	1	0.581251	0.866411	0.338393	0.858987	0.968722	0.999441	0.842524	0.335669	0.451305	0.948777	0.990195	0.808759	0.180897	0.764055	0.824078
Serinc2	0.206403	2.33e-06	0.00508606	0.371571	0.0295463	0.25287	0.629247	0.922239	0.000225503	0.101053	0.997582	0.953233	0.997331	0.935422	0.000360519	2.57133e-12	0.0691943	0.196532	0.553757	0.484273	0.0935866	0.101218	1.4218e-09	0.187659	0.998622	0.883812	0.959141	0.558549	0.494982	0.0156698	0.433038	0.999932	0.310031	1	0.171323	5.70826e-07	0.0678691	0.67749	8.38043e-05	0.999441	0.000404914	2.26039e-06	0.66243	0.165416	0.00132742	0.906853	0.607313	0.895815	0.13114
Chst3	0.791311	0.772368	0.173751	0.571778	0.743976	0.117224	0.282012	0.987567	0.978525	0.565637	0.997582	0.979323	0.997331	0.901424	0.108185	0.44248	0.919794	0.715254	0.166201	0.357558	0.856352	0.521355	0.799254	0.958969	0.998622	0.714642	0.955487	0.968009	0.666075	0.205328	0.246041	0.999932	0.82065	1	0.020416	0.825037	0.809821	0.483281	0.959055	0.999441	0.952951	0.350709	0.703901	0.979071	0.990195	0.910121	0.0364704	0.718032	0.681294
Ltbp4	0.597235	0.53408	0.762546	0.530441	0.408339	0.520956	0.0451925	0.948409	0.928595	0.915545	0.997582	0.955323	0.997331	0.901424	0.399002	0.796564	0.165739	0.10742	0.53876	0.890182	0.345686	0.711594	0.944724	0.335114	0.998622	0.877941	0.995068	0.779863	0.273961	0.275942	0.263217	0.999932	0.858964	1	0.294308	0.854682	0.517728	0.744474	0.966287	0.999441	0.854274	0.997006	0.115666	0.951598	0.999026	0.620623	0.405604	0.772425	0.337528
Nr2f2	0.16796	0.276036	0.871818	0.388668	0.471046	0.698773	0.127722	0.922239	0.844929	0.958603	0.997582	0.963871	0.997331	0.901424	0.0518794	0.464062	0.208025	0.386394	0.559438	0.851378	0.0405514	0.447541	0.808918	0.388395	0.998622	0.885754	0.990097	0.427349	0.653287	0.32355	0.677202	0.999932	0.861162	1	0.239732	0.705326	0.305818	0.736215	0.909559	0.999441	0.129496	0.662726	0.0947729	0.567068	0.995606	0.58778	0.151825	0.764055	0.481215
Lamb3	0.11513	0.0259524	0.159862	0.160354	0.224755	0.146482	0.106926	0.922239	0.354	0.548114	0.997582	0.953233	0.997331	0.901424	0.356616	2.88255e-14	1.41454e-08	0.32121	0.0144289	8.55142e-07	0.0570036	0.684753	3.87085e-11	9.02641e-07	0.998622	0.412254	0.00114833	0.477145	0.139866	0.0691785	0.125249	0.999932	0.603658	1	0.96878	1.27193e-09	0.632035	0.991251	7.4694e-07	0.999441	0.164739	8.96252e-05	0.024456	0.604766	0.0161946	0.439922	0.191748	0.764055	0.0967122
Gamt	0.999161	0.296504	0.00846046	0.598879	0.845007	0.0127577	0.550902	0.99979	0.85225	0.135946	0.997582	0.992504	0.997331	0.924282	0.221912	0.319471	0.342925	0.32447	0.387591	0.00148396	0.314822	0.614788	0.726638	0.526198	0.998622	0.828788	0.15743	0.771382	0.874073	0.0379451	0.477275	0.999932	0.473583	1	0.0888328	0.00107822	0.0986821	0.619904	0.0312536	0.999441	0.826709	0.159068	0.947431	0.945673	0.990195	0.987143	0.0643939	0.741388	0.96048
Ctf1	0.809913	0.371522	0.616209	0.661845	0.134128	0.848219	0.832639	0.987845	0.874038	0.836426	0.997582	0.953233	0.997331	0.976402	0.242651	0.728449	0.0241076	0.567371	0.506241	0.360433	0.856594	0.629567	0.919441	0.0899965	0.998622	0.863785	0.955487	0.968009	0.40362	0.393287	0.867026	0.999932	0.882402	1	0.686004	0.424665	0.779707	0.912858	0.755526	0.999441	0.242518	0.600141	0.668469	0.676585	0.995606	0.907056	0.686368	0.912379	0.621611
Glrx	0.0371814	0.827299	0.0223867	0.137105	0.507442	0.0477478	0.905515	0.891594	0.985535	0.224766	0.997582	0.966751	0.997331	0.986735	0.143387	0.00555698	0.000365317	0.110405	0.936232	0.931599	0.742351	0.554664	0.0905296	0.00366096	0.998622	0.994528	0.996665	0.931904	0.106288	0.218606	0.320554	0.999932	0.836166	1	0.472431	0.0719705	0.349352	0.826141	0.38857	0.999441	0.173823	0.0758048	0.192598	0.618419	0.913463	0.678814	0.105423	0.741388	0.426679
Fasn	0.900371	0.411834	0.0282098	0.24818	0.844156	0.431988	0.472672	0.993268	0.889531	0.255036	0.997582	0.992504	0.997331	0.908066	0.335922	0.330342	0.143102	0.406267	0.431612	0.492162	0.174911	0.67617	0.731667	0.306066	0.998622	0.84384	0.959946	0.657398	0.898233	0.401003	0.335881	0.999932	0.890154	1	0.327554	0.442136	0.278805	0.75184	0.769247	0.999441	0.914263	0.91014	0.0555857	0.963458	0.995606	0.52941	0.318083	0.772425	0.297005
Ppp1cb	0.21524	0.0669025	0.916671	0.458891	0.129452	0.786967	0.164844	0.922239	0.553588	0.972726	0.997582	0.953233	0.997331	0.901424	0.504367	0.0356249	0.946707	0.508815	0.00897646	0.957664	0.066235	0.780292	0.282274	0.972999	0.998622	0.35962	0.998116	0.5017	0.831959	0.173131	0.704489	0.999932	0.797572	1	0.0686461	0.119675	0.416079	0.598313	0.489539	0.999441	0.0450874	0.289591	0.118803	0.442018	0.990195	0.621502	0.854608	0.956884	0.228382
Runx1	0.510134	0.0536792	0.503852	0.631379	0.840225	0.123362	0.4986	0.947805	0.506507	0.783103	0.997582	0.992473	0.997331	0.913567	0.166674	0.242456	0.0437196	0.126521	0.671532	0.498997	0.892675	0.580188	0.679818	0.137538	0.998622	0.923863	0.959946	0.977886	0.786812	0.0141101	0.890672	0.999932	0.295895	1	0.0783379	0.0540539	0.0591956	0.611505	0.334055	0.999441	0.530288	0.859725	0.465616	0.795627	0.995606	0.812489	0.123022	0.741388	0.543953
Cidec	0.184063	0.0971259	0.0792314	0.952712	0.378491	0.778979	0.243728	0.922239	0.643039	0.409893	0.997582	0.953233	0.997331	0.901424	0.953738	0.0772513	0.739461	0.983057	0.701754	0.628271	0.187206	0.985613	0.414476	0.849133	0.999529	0.933856	0.972637	0.673541	0.114944	0.243802	0.407188	0.999932	0.858214	1	0.574448	0.247235	0.261412	0.854667	0.648141	0.999441	0.746431	0.217195	0.423585	0.917288	0.990195	0.805298	0.766993	0.942347	0.387651
Arhgef2	0.477093	0.926392	0.535261	0.869141	0.302463	0.940277	0.614234	0.946216	0.992776	0.800672	0.997582	0.953233	0.997331	0.932778	0.207014	0.680096	0.695583	0.31364	0.390825	0.732306	0.83634	0.602456	0.902698	0.818003	0.998622	0.830868	0.981634	0.961517	0.83998	0.942736	0.828301	0.999932	0.988519	1	0.639068	0.568581	0.235393	0.886038	0.837389	0.999441	0.241302	0.974335	0.636945	0.676585	0.997528	0.889659	0.569289	0.871094	0.390942
Hsd11b1	0.418944	0.0432171	5.77e-06	0.527232	0.686129	0.259513	0.153185	0.930025	0.466287	0.00139166	0.997582	0.977609	0.997331	0.901424	0.0717782	0.00079035	1.30969e-12	0.804144	0.310267	1.59558e-05	0.0154752	0.478774	0.0214101	4.55966e-10	0.998622	0.801054	0.00833248	0.328368	0.708592	0.0426583	0.601208	0.999932	0.496354	1	0.0907784	2.88895e-06	0.0524499	0.622467	0.000331031	0.999441	0.410699	0.546244	0.111297	0.755763	0.995606	0.609155	0.129819	0.741388	0.0067371
Fads1	0.254263	0.937105	0.0658934	0.0735741	0.0982457	0.632224	0.755542	0.922239	0.993072	0.38121	0.997582	0.953233	0.997331	0.958229	0.00237356	0.771957	7.80537e-06	0.256401	0.118219	0.725519	0.0331	0.199209	0.934185	0.000171828	0.998622	0.679279	0.981634	0.402633	0.790074	0.879947	0.315629	0.999932	0.987566	1	0.00582406	0.468159	0.208176	0.410348	0.784942	0.999441	0.0307261	0.585541	0.0932518	0.432389	0.995606	0.58693	0.950181	0.978898	0.692787
Slc26a1	0.571354	0.931922	0.692091	0.744112	0.696193	0.884188	0.428533	0.948409	0.992776	0.879023	0.997582	0.977609	0.997331	0.901424	0.344115	0.633638	0.00578306	0.523709	0.918891	0.574555	0.479067	0.678789	0.882269	0.0312239	0.998622	0.989408	0.968564	0.837664	0.885437	0.983827	0.762511	0.999932	0.997258	1	0.494088	0.473254	0.973876	0.834223	0.78795	0.999441	0.504818	0.85292	0.428977	0.794754	0.995606	0.806486	0.686401	0.912379	0.676172
Prps2	0.195849	0.191044	0.915857	0.574789	0.304571	0.834956	0.120449	0.922239	0.788343	0.972726	0.997582	0.953233	0.997331	0.901424	0.320656	0.166705	0.391629	0.227	0.377756	0.861013	0.290331	0.6724	0.584029	0.566617	0.998622	0.825866	0.991618	0.760637	0.120226	0.249907	0.506488	0.999932	0.858964	1	0.218844	0.211391	0.819093	0.724497	0.608598	0.999441	0.834403	0.448978	0.149001	0.947667	0.990195	0.638946	0.672472	0.912379	0.145511
Lmo4	0.0338779	0.00890346	0.029951	0.770021	0.785435	0.734918	0.986694	0.866626	0.188922	0.262268	0.997582	0.983577	0.997331	0.997555	0.0441343	0.00498257	0.0647369	0.868308	0.954921	0.498308	0.94095	0.432387	0.0840864	0.179035	0.998622	0.996192	0.959946	0.987167	0.0967698	0.0153339	0.822218	0.999932	0.305314	1	0.235038	0.0235706	0.809919	0.73562	0.217981	0.999441	0.123579	0.196473	0.943915	0.561687	0.990195	0.986159	0.197507	0.764055	0.315657
Cd44	0.977621	0.320329	0.959433	0.961968	0.452518	0.814245	0.353861	0.998467	0.864227	0.983902	0.997582	0.961316	0.997331	0.901424	0.311181	0.662539	0.10878	0.385591	0.976557	0.585166	0.567648	0.670919	0.896792	0.25605	0.998622	0.998095	0.968564	0.877993	0.677234	0.439119	0.611274	0.999932	0.909114	1	0.427496	0.995064	0.798685	0.803173	0.999048	0.999441	0.5248	0.475566	0.352269	0.795049	0.990195	0.783128	0.628117	0.906694	0.966616
Atp9a	0.593211	0.0553684	0.287478	0.151263	0.290732	0.39457	0.189189	0.948409	0.512772	0.65669	0.997582	0.953233	0.997331	0.901424	0.467006	0.0675163	0.333223	0.223995	0.29718	0.403112	0.149334	0.757568	0.386378	0.517563	0.998622	0.79552	0.955487	0.633783	0.229607	0.00024508	0.369208	0.999932	0.0221468	1	0.900423	0.00283155	0.886898	0.980711	0.0589916	0.999441	0.482235	0.18633	0.19051	0.794754	0.990195	0.678062	0.0878551	0.741388	0.669634
Rab11fip2	0.669762	0.146781	0.482828	0.417429	0.230595	0.410054	0.108767	0.96843	0.73211	0.771883	0.997582	0.953233	0.997331	0.901424	0.934728	0.0217164	0.728197	0.307534	0.295313	0.101476	0.118372	0.978785	0.212814	0.841729	0.998622	0.794823	0.904506	0.589041	0.295023	0.103847	0.607269	0.999932	0.693644	1	0.656366	0.00486754	0.749416	0.894526	0.0840725	0.999441	0.614079	0.66217	0.100522	0.840791	0.995606	0.595879	0.218134	0.772425	0.244516
Wwp2	0.313886	0.116639	0.630977	0.223891	0.0891293	0.329414	0.0161471	0.922239	0.683122	0.844522	0.997582	0.953233	0.997331	0.901424	0.492253	0.545957	0.632643	0.00964367	0.00404502	0.284421	0.0241515	0.773646	0.845747	0.770217	0.998622	0.31686	0.955487	0.368404	0.723822	0.0854214	0.447291	0.999932	0.657495	1	0.032815	0.194419	0.389752	0.51766	0.588141	0.999441	0.0611374	0.643321	0.0114029	0.472424	0.995606	0.38887	0.135032	0.741594	0.117339
Aldh1l2	0.806948	0.00640207	0.548985	0.56975	0.776677	0.564101	0.870736	0.987845	0.152986	0.806367	0.997582	0.983105	0.997331	0.982576	0.129359	0.0109468	0.984199	0.381719	0.153651	0.347384	0.592963	0.539718	0.141346	0.992207	0.998622	0.705192	0.955487	0.888526	0.607902	0.0872023	0.584455	0.999932	0.660025	1	0.0269389	0.223983	0.267878	0.495338	0.625867	0.999441	0.875312	0.0391274	0.803482	0.957349	0.732353	0.942746	0.78328	0.942998	0.70367
Mthfd2	0.77593	0.768959	0.738605	0.521159	0.559183	0.962075	0.340347	0.986574	0.978525	0.905909	0.997582	0.971366	0.997331	0.901424	0.205984	0.666037	0.223709	0.967564	0.415459	0.969936	0.0895504	0.601133	0.898027	0.407295	0.998895	0.838445	0.998526	0.548699	0.554772	0.841218	0.852501	0.999932	0.987566	1	0.0975472	0.762776	0.196466	0.63027	0.936501	0.999441	0.826466	0.791858	0.269054	0.94551	0.995606	0.742088	0.349613	0.772425	0.986255
Neo1	0.341756	0.0198684	0.7568	0.985661	0.37192	0.762559	0.71492	0.922239	0.311271	0.9134	0.997636	0.953233	0.997331	0.951726	0.0164685	0.265679	0.00330997	0.832112	0.652938	0.0466543	0.808761	0.328325	0.694104	0.020465	0.998622	0.914383	0.80468	0.953427	0.837492	0.0869023	0.802553	0.999932	0.659503	1	0.0100841	0.332317	0.985708	0.439299	0.70257	0.999441	0.295915	0.103898	0.796411	0.697105	0.990195	0.939432	0.609118	0.896961	0.634439
Col4a6	0.491866	7.21e-05	0.242208	0.225005	0.447188	0.283595	0.502859	0.947805	0.00429223	0.61729	0.997582	0.958596	0.997331	0.913951	0.818464	2.04189e-06	0.0479229	0.886259	0.0363412	0.0631294	0.0456269	0.939188	0.000171373	0.145409	0.998622	0.527172	0.853176	0.446642	0.8607	0.00108061	0.675586	0.999932	0.0577021	1	0.2094	1.51239e-05	0.138947	0.712096	0.00130371	0.999441	0.410194	0.0269831	0.184615	0.755573	0.619946	0.673126	NA	NA	0.235697
Nsmaf	0.131264	0.146431	0.793874	0.489744	0.343986	0.307644	0.89684	0.922239	0.73211	0.931289	0.997582	0.953233	0.997331	0.985006	0.0901301	0.504495	0.37909	0.894944	0.472224	0.838268	0.725929	0.505928	0.829769	0.555835	0.998622	0.853364	0.989025	0.927636	0.588733	0.0323867	0.416852	0.999932	0.446947	1	0.36379	0.51024	0.896671	0.759531	0.807556	0.999441	0.1618	0.859617	0.75222	0.600462	0.995606	0.923821	0.307344	0.772425	0.98867
Sh3glb1	0.312092	0.59063	0.590458	0.983831	0.0091426	0.349396	0.15775	0.922239	0.934256	0.823434	0.997582	0.953233	0.997331	0.901424	0.945682	0.649319	0.405394	0.217572	0.145154	0.461125	0.840067	0.982789	0.890077	0.579134	0.998622	0.697928	0.957632	0.962888	0.00960427	0.328742	0.27125	0.999932	0.863175	1	0.305413	0.506262	0.496438	0.744474	0.80577	0.999441	0.240809	0.690586	0.370227	0.676585	0.995606	0.78583	0.0142318	0.526095	0.970976
Moxd1	0.919375	0.0582925	0.148031	0.845582	0.705126	0.263585	0.585928	0.995022	0.522354	0.534365	0.997582	0.977609	0.997331	0.928578	0.19393	2.87703e-06	0.03687	0.652894	0.739363	0.280909	0.520289	0.591175	0.000223505	0.121544	0.998622	0.94784	0.955487	0.854151	0.82928	0.564588	0.853159	0.999932	0.933345	1	0.0889	9.18221e-05	0.881863	0.619904	0.00498705	0.999441	0.888517	0.0154765	0.495996	0.958009	0.494471	0.827792	0.193049	0.764055	0.581158
Col4a5	0.755577	0.011812	0.000267405	0.522845	0.375682	0.0718664	0.149033	0.981979	0.227526	0.0170994	0.997582	0.953233	0.997331	0.901424	0.593087	0.00227597	0.0142346	0.229867	0.873501	0.422941	0.516787	0.821305	0.0480767	0.0612	0.998622	0.981782	0.955487	0.853211	0.27803	0.295174	0.409035	0.999932	0.858964	1	0.600797	0.0641571	0.634765	0.868356	0.364984	0.999441	0.812414	0.025606	0.262626	0.941298	0.619946	0.742088	6.9e-14	3.22e-10	0.283377
Ptpn5	0.890289	0.2903	0.307309	0.182114	0.0645836	0.581375	0.788035	0.993268	0.849884	0.667558	0.997582	0.953233	0.997331	0.962985	0.424792	0.0470825	0.000528015	0.754917	0.225106	0.190558	0.518905	0.729724	0.318399	0.00488888	0.998622	0.754197	0.955487	0.853941	0.144668	0.124588	0.145896	0.999932	0.72774	1	0.890999	0.0213735	0.776768	0.980711	0.205522	0.999441	0.252559	0.732837	0.562193	0.679092	0.995606	0.860741	NA	NA	0.539666
Pkig	0.448069	0.514203	0.35999	0.386953	0.272614	0.446906	0.419962	0.943348	0.922022	0.695704	0.997582	0.953233	0.997331	0.901424	0.140724	0.494277	0.473025	0.300601	0.355659	0.580148	0.373047	0.551747	0.825108	0.642363	0.998622	0.816608	0.968564	0.792424	0.350547	0.450849	0.390747	0.999932	0.919455	1	0.194472	0.575984	0.341529	0.702779	0.839377	0.999441	0.165198	0.735219	0.986379	0.604766	0.995606	0.994209	0.347057	0.772425	0.344862
Atf4	0.327444	0.952043	0.00713213	0.628807	0.156604	0.870341	0.99215	0.922239	0.993142	0.124845	0.997582	0.953233	0.997331	0.99826	0.0875369	0.10679	0.0104309	0.945193	0.123877	0.310897	0.532983	0.502335	0.485645	0.0485877	0.998895	0.6881	0.955487	0.861026	0.814341	0.896963	0.749344	0.999932	0.987566	1	0.909803	0.0443773	0.615844	0.983067	0.306929	0.999441	0.0616234	0.910607	0.688338	0.472424	0.995606	0.907085	0.191522	0.764055	0.454089
Sntb1	0.396424	0.770397	0.635191	0.676019	0.55329	0.958441	0.897356	0.923029	0.978525	0.846991	0.997582	0.970444	0.997331	0.985006	0.635827	0.989534	0.609434	0.893879	0.517918	0.882883	0.733901	0.846929	0.999044	0.751401	0.998622	0.868794	0.994911	0.929615	0.319331	0.828103	0.836068	0.999932	0.987566	1	0.452182	0.942886	0.923564	0.819264	0.983281	0.999441	0.889027	0.89512	0.704638	0.958009	0.995606	0.910448	0.879656	0.956884	0.977318
Itgb5	0.638534	0.151227	0.334128	0.338866	0.271842	0.483014	0.305331	0.958668	0.738778	0.684609	0.997582	0.953233	0.997331	0.901424	0.116542	0.490932	0.0447331	0.951245	0.953984	0.140621	0.0632675	0.531504	0.823035	0.139837	0.998895	0.996192	0.946526	0.493464	0.517992	0.24343	0.974105	0.999932	0.858214	1	0.0685307	0.349632	0.0519641	0.598313	0.711841	0.999441	0.445752	0.268796	0.304878	0.778404	0.990195	0.757503	0.319338	0.772425	0.379618
Thbs2	0.221807	0.63532	0.416048	0.777694	0.389456	0.51886	0.910968	0.922239	0.94398	0.725306	0.997582	0.953233	0.997331	0.987385	0.0377029	0.497619	2.97771e-06	0.480533	0.928242	0.457919	0.436166	0.407152	0.827166	7.92932e-05	0.998622	0.99266	0.957393	0.815751	0.758885	0.874915	0.789155	0.999932	0.987566	1	0.158625	0.72678	0.32833	0.667951	0.919424	0.999441	0.167557	0.473073	0.936882	0.607499	0.990195	0.985143	0.758642	0.938335	0.844956
Fzd2	0.484355	0.157002	0.47927	0.478596	0.622184	0.910073	0.236862	0.947805	0.747826	0.769846	0.997582	0.976655	0.997331	0.901424	0.229779	0.598322	0.0166753	0.37899	0.738563	0.186012	0.0822358	0.61871	0.86576	0.0685509	0.998622	0.947661	0.955487	0.534414	0.828089	0.287505	0.778921	0.999932	0.858964	1	0.325755	0.349016	0.356088	0.751451	0.711811	0.999441	0.415497	0.336738	0.167643	0.75841	0.990195	0.658757	0.680147	0.912379	0.549336
Acadl	0.316379	0.200723	0.067426	0.184158	0.301757	0.66898	0.438169	0.922239	0.796105	0.386062	0.997582	0.953233	0.997331	0.901424	0.955546	0.658937	0.0452195	0.117281	0.94031	0.819031	0.251998	0.986289	0.89519	0.140517	0.998622	0.994971	0.98559	0.730604	0.260594	0.368588	0.262271	0.999932	0.873844	1	0.995464	0.945921	0.157847	0.998465	0.984151	0.999441	0.758477	0.260909	0.45054	0.923142	0.990195	0.808759	0.157939	0.764055	0.581748
Gpc1	0.814134	0.414531	0.194031	0.511082	0.424042	0.730935	0.206756	0.987845	0.891224	0.582155	0.997582	0.955323	0.997331	0.901424	0.838314	0.977773	0.780852	0.454017	0.0631889	0.0339882	0.00826649	0.94672	0.999044	0.875896	0.998622	0.608905	0.78214	0.274874	0.748666	0.801819	0.761667	0.999932	0.987566	1	0.23992	0.0889684	0.179343	0.736215	0.428473	0.999441	0.189538	0.189451	0.0281118	0.630754	0.990195	0.452174	0.349868	0.772425	0.702274
Mat2a	0.62553	0.551291	0.564435	0.0209634	0.152208	0.135596	0.504182	0.953539	0.929315	0.812009	0.997582	0.953233	0.997331	0.913951	0.434189	0.0617606	0.699979	0.0188524	0.225622	0.0910038	0.014914	0.737223	0.367797	0.821039	0.998622	0.754197	0.898407	0.325102	0.253328	0.648524	0.241	0.999932	0.955476	1	0.978017	0.31516	0.663499	0.99345	0.689983	0.999441	0.438416	0.0876634	0.0235453	0.773442	0.938138	0.439801	0.627423	0.906536	0.824049
Tgfbi	0.399826	0.992537	0.889629	0.910687	0.949231	0.853401	0.698339	0.923029	0.997825	0.96438	0.997582	0.999856	0.997331	0.949022	0.547204	0.612854	0.62935	0.866688	0.80312	0.861946	0.469545	0.799335	0.873382	0.7674	0.998622	0.962385	0.991631	0.83295	0.560335	0.916988	0.870099	0.999932	0.987566	1	0.822519	0.655092	0.546799	0.969764	0.881462	0.999441	0.53249	0.864789	0.674911	0.796713	0.995606	0.907085	0.746568	0.932212	0.881151
Tmsb4x	0.177066	0.500546	0.379739	0.883229	0.441306	0.546874	0.0371705	0.922239	0.919239	0.704278	0.997582	0.956353	0.997331	0.901424	0.0185148	0.844067	0.75206	0.155329	0.0801907	0.911015	0.260926	0.329646	0.967214	0.856997	0.998622	0.628886	0.996665	0.740774	0.206213	0.416867	0.245429	0.999932	0.895948	1	0.013598	0.947151	0.727762	0.439299	0.984889	0.999441	0.614532	0.949494	0.054267	0.840976	0.996237	0.526117	0.317715	0.772425	0.0790493
Pemt	0.980711	0.169837	0.529451	0.404074	0.425244	0.386349	0.204376	0.998481	0.765306	0.797786	0.997582	0.955323	0.997331	0.901424	0.229147	0.158527	0.42311	0.139386	0.59319	0.767867	0.80953	0.61863	0.57713	0.59593	0.998622	0.900826	0.982301	0.953456	0.63121	0.235044	0.254104	0.999932	0.854254	1	0.689198	0.178423	0.15617	0.914905	0.569802	0.999441	0.239153	0.577388	0.489556	0.676585	0.995606	0.825422	0.364605	0.772425	0.444539
Lypd2	0.968843	0.244283	0.56051	0.740184	0.662093	0.634044	0.599875	0.99773	0.823569	0.810086	0.997582	0.977609	0.997331	0.930876	0.708785	0.980186	0.363908	0.722882	0.471162	0.124131	0.541923	0.88787	0.999044	0.543491	0.998622	0.852481	0.928418	0.864722	0.783272	0.575016	0.542308	0.999932	0.933345	1	0.439378	0.307646	0.448217	0.810921	0.686539	0.999441	0.818941	0.267021	0.882678	0.943498	0.990195	0.967868	0.680693	0.912379	0.577833
Mettl7b	0.79671	0.775432	0.749265	0.742841	0.190164	0.37398	0.634195	0.987845	0.978525	0.91043	0.997582	0.953233	0.997331	0.936307	0.0936304	0.678274	0.205005	0.409966	0.7839	0.2423	0.851882	0.508543	0.901843	0.384409	0.998622	0.957672	0.955487	0.967284	0.294445	0.739429	0.949375	0.999932	0.983055	1	0.086956	0.490674	0.570612	0.619052	0.799718	0.999441	0.446033	0.37482	0.557454	0.778404	0.990195	0.858803	0.355827	0.772425	0.54895
Tmem223	0.264398	0.488513	0.304208	0.234783	0.741169	0.796351	0.706632	0.922239	0.917324	0.666596	0.997582	0.979323	0.997331	0.950943	0.0767541	0.260284	0.258205	0.534809	0.852722	0.86353	0.182695	0.484757	0.692216	0.446409	0.998622	0.976087	0.992078	0.668664	0.554883	0.73874	0.555238	0.999932	0.983055	1	0.106985	0.387768	0.56003	0.634218	0.734422	0.999441	0.313526	0.487672	0.256314	0.710847	0.993316	0.738286	0.598824	0.889807	0.554195
Nudt22	0.0805595	0.354127	0.948796	0.79566	0.0386188	0.227051	0.549363	0.922239	0.873319	0.980721	0.997582	0.953233	0.997331	0.924282	0.0469883	0.959379	0.0502545	0.867903	0.0501748	0.830118	0.911933	0.436774	0.999044	0.1503	0.998622	0.586175	0.987735	0.979139	0.811443	0.12391	0.523253	0.999932	0.727736	1	0.878442	0.931005	0.860573	0.978544	0.980826	0.999441	0.0242555	0.755042	0.797967	0.424825	0.995606	0.940033	0.199885	0.764055	0.413733
Atraid	0.538602	0.362996	0.42206	0.0383977	0.321527	0.488137	0.691929	0.947805	0.873319	0.729404	0.997582	0.953233	0.997331	0.946156	0.328016	0.000214337	0.0419707	0.00388425	0.0401711	0.0965298	0.66614	0.673632	0.00793215	0.132957	0.998622	0.550773	0.899663	0.909737	0.344454	0.819599	0.250552	0.999932	0.987566	1	0.0443825	4.9605e-05	0.016542	0.547612	0.00332921	0.999441	0.779412	0.193012	0.054824	0.931843	0.990195	0.527793	0.391692	0.772425	0.48719
Tmbim4	0.1779	0.889206	0.0810869	0.436987	0.0253627	0.979376	0.549514	0.922239	0.991762	0.41583	0.997582	0.953233	0.997819	0.924282	0.180907	0.585057	0.000209226	0.41937	0.00693146	0.29505	0.645312	0.584096	0.859713	0.00235254	0.998622	0.34696	0.955487	0.906212	0.592079	0.98487	0.407399	0.999932	0.997258	1	0.386323	0.166662	0.479371	0.769534	0.554124	0.999441	0.0057352	0.998354	0.927785	0.320762	0.99963	0.981476	0.931789	0.971511	0.61967
Hikeshi	0.382743	0.36089	0.664321	0.447968	0.155572	0.332722	0.106234	0.92284	0.873319	0.863944	0.997582	0.953233	0.997331	0.901424	0.255148	0.0563584	0.275586	0.301878	0.00624425	0.126934	0.00419324	0.639215	0.351073	0.464999	0.998622	0.34527	0.935093	0.239344	0.755387	0.956423	0.648866	0.999932	0.991241	1	0.148452	0.854246	0.170326	0.660131	0.966116	0.999441	0.0204013	0.065719	0.0178831	0.424822	0.896057	0.39912	0.330773	0.772425	0.218693
Ercc6l2	0.545994	0.48989	0.571679	0.699652	0.799886	0.7806	0.577676	0.947805	0.917324	0.814333	0.997582	0.986063	0.997331	0.928578	0.498915	0.323234	0.258019	0.983545	0.803865	0.636861	0.32205	0.777113	0.726783	0.44617	0.999529	0.962952	0.972637	0.773898	0.51624	0.490475	0.917679	0.999932	0.929463	1	0.438161	0.305859	0.45145	0.809947	0.685117	0.999441	0.849443	0.807727	0.521718	0.950065	0.995606	0.841556	0.794603	0.942998	0.587832
Erg28	0.872769	0.397546	0.980611	0.302561	0.579724	0.574048	0.953591	0.993268	0.883019	0.992329	0.997582	0.972725	0.997331	0.992972	0.0596692	0.233057	0.00318802	0.640777	0.690685	0.215104	0.172207	0.462019	0.66995	0.0200451	0.998622	0.931083	0.955487	0.655363	0.821272	0.457535	0.573903	0.999932	0.9232	1	0.126964	0.175335	0.572651	0.652685	0.566523	0.999441	0.289414	0.759757	0.145759	0.691408	0.995606	0.638946	0.726937	0.922949	0.99973
Tsr3	0.998171	0.170484	0.0017499	0.00969289	0.866801	0.507667	0.0648555	0.99934	0.765306	0.0558682	0.997582	0.993079	0.997331	0.901424	0.460506	0.358801	0.77909	0.0142338	0.301624	0.215269	0.0164813	0.752916	0.752338	0.874964	0.998622	0.797005	0.955487	0.329886	0.969114	0.600098	0.517853	0.999932	0.942061	1	0.318702	0.923474	0.819204	0.746499	0.979707	0.999441	0.975452	0.123735	0.00207595	0.989126	0.990195	0.372674	0.22357	0.772425	0.0350258
0610009B22Rik	0.517181	0.561304	0.322746	0.4282	0.437254	0.827895	0.769767	0.947805	0.929315	0.679436	0.997582	0.955323	0.997331	0.960183	0.184451	0.899796	0.686999	0.730156	0.973913	0.644819	0.487533	0.586351	0.987834	0.811893	0.998622	0.998095	0.973514	0.8415	0.966566	0.546938	0.704766	0.999932	0.933345	1	0.36443	0.703038	0.821895	0.759531	0.909559	0.999441	0.338188	0.783363	0.465288	0.724161	0.995606	0.812308	0.935315	0.97325	0.922077
Emc6	0.680704	0.0770643	0.0174937	0.726567	0.304751	0.411958	0.0905557	0.971442	0.587264	0.195765	0.997582	0.953233	0.997331	0.901424	0.723039	0.523805	0.0165415	0.699106	0.436113	0.149933	0.0512587	0.896054	0.838374	0.0681377	0.998622	0.84384	0.946526	0.460147	0.712684	0.390268	0.316038	0.999932	0.880093	1	0.843733	0.614119	0.14251	0.975582	0.856678	0.999441	0.394387	0.104149	0.18866	0.743511	0.990195	0.677941	0.0314824	0.681036	0.576667
Pcgf5	0.23313	0.914866	0.20412	0.619325	0.351181	0.506657	0.141222	0.922239	0.991833	0.592306	0.997582	0.953233	0.997331	0.901424	0.0397534	0.804111	1.23629e-05	0.436931	0.174221	0.0984065	0.0215814	0.416171	0.947118	0.000246211	0.998622	0.719938	0.899663	0.35404	0.840523	0.779661	0.58951	0.999932	0.987566	1	0.439097	0.076133	0.208569	0.81072	0.39955	0.999441	0.0635315	0.437218	0.0714461	0.473588	0.990195	0.555718	0.581447	0.880438	0.269543
Crls1	0.599957	0.035326	0.24972	0.443088	0.67999	0.548531	0.568062	0.948456	0.418217	0.624961	0.997582	0.977609	0.997331	0.925886	0.633902	0.0155904	0.608801	0.441656	0.385713	0.38172	0.394902	0.845083	0.17593	0.751212	0.998622	0.827963	0.955487	0.798059	0.863951	0.299196	0.872641	0.999932	0.858964	1	0.999714	0.18401	0.971171	0.999927	0.5778	0.999441	0.504809	0.0315545	0.25762	0.794754	0.667762	0.738916	0.345462	0.772425	0.52733
Rnf215	0.711669	0.934553	0.538302	0.0807315	0.67834	0.5796	0.157459	0.976867	0.993072	0.802162	0.997582	0.977609	0.997331	0.901424	0.408928	0.665288	0.145536	0.716873	0.482229	0.907434	0.520975	0.716732	0.897876	0.309511	0.998622	0.85804	0.996621	0.854288	0.650226	0.735462	0.0678144	0.999932	0.982711	1	0.342075	0.839718	0.523884	0.755273	0.963435	0.999441	0.96043	0.638295	0.813084	0.981531	0.995606	0.947914	0.243407	0.772425	0.392276
Mul1	0.602051	0.974182	0.919103	0.749485	0.082464	0.805303	0.322886	0.949173	0.995984	0.972726	0.997582	0.953233	0.997331	0.901424	0.069796	0.856242	0.0288146	0.875594	0.651843	0.866031	0.27468	0.477398	0.972433	0.10252	0.998622	0.913958	0.992516	0.752476	0.34509	0.794188	0.624195	0.999932	0.987566	1	0.255588	0.898676	0.50225	0.744347	0.973816	0.999441	0.163711	0.909899	0.4068	0.603937	0.995606	0.798814	0.843302	0.954974	0.14777
Spacdr	0.778871	0.819465	0.29894	0.690362	0.713846	0.264322	0.984021	0.986948	0.985454	0.664469	0.997582	0.977609	0.997331	0.997467	0.405394	0.294552	0.759354	0.793845	0.981861	0.6966	0.535238	0.71482	0.714844	0.861756	0.998622	0.998173	0.980494	0.861661	0.96674	0.571469	0.799306	0.999932	0.933345	1	0.48703	0.620924	0.55271	0.831878	0.860375	0.999441	0.64464	0.313975	0.778758	0.860356	0.990195	0.930233	0.216319	0.772425	0.885439
Mfsd10	0.297969	0.572779	0.367888	0.397825	0.311112	0.379655	0.264535	0.922239	0.932184	0.699746	0.997582	0.953233	0.997331	0.901424	0.359648	0.52628	0.180469	0.374505	0.248049	0.413179	0.30614	0.686711	0.839006	0.35406	0.998622	0.764241	0.955487	0.765498	0.876609	0.386683	0.60064	0.999932	0.879436	1	0.55384	0.537828	0.990818	0.846464	0.819985	0.999441	0.317806	0.495642	0.34185	0.711567	0.993316	0.780186	0.552239	0.858063	0.321054
Dele1	0.859284	0.921858	0.881098	0.920115	0.897388	0.279631	0.159258	0.993268	0.992776	0.961942	0.997582	0.998041	0.997331	0.901424	0.915947	0.574819	0.000595642	0.318041	0.707646	0.413396	0.420409	0.973277	0.8559	0.00535281	0.998622	0.936526	0.955487	0.809106	0.975251	0.50452	0.463145	0.999932	0.931186	1	0.922657	0.810712	0.852876	0.983967	0.95632	0.999441	0.761351	0.315854	0.134467	0.924733	0.990195	0.636857	0.920255	0.967986	0.917554
Ccdc88c	0.228763	0.965088	0.596979	0.703133	0.841259	0.291896	0.506242	0.922239	0.995277	0.825928	0.997582	0.992473	0.997331	0.913951	0.0982198	0.920671	0.107303	0.756258	0.605012	0.263328	0.499303	0.515199	0.994331	0.253748	0.998622	0.902901	0.955487	0.846277	0.29174	0.463525	0.450728	0.999932	0.923972	1	0.0550091	0.388854	0.370483	0.578943	0.735119	0.999441	0.51984	0.456978	0.825135	0.795049	0.990195	0.951561	0.90761	0.962585	0.560634
Sdhaf1	0.547152	0.504648	0.893909	0.768836	0.603319	0.163801	0.542037	0.947805	0.92107	0.965389	0.997582	0.976381	0.997331	0.922867	0.436278	0.0873386	0.218168	0.991706	0.338269	0.486896	0.28214	0.738389	0.44478	0.40117	0.999529	0.809278	0.959141	0.755565	0.440966	0.634954	0.842315	0.999932	0.951115	1	0.239577	0.366481	0.390436	0.736215	0.720026	0.999441	0.992555	0.138386	0.504865	0.99654	0.990195	0.832801	0.399237	0.772425	0.232057
Brox	0.0995315	0.756554	0.0101786	0.3158	0.246243	0.937055	0.505513	0.922239	0.973616	0.150596	0.997582	0.953233	0.997331	0.913951	0.0120707	0.117622	0.000471047	0.418364	0.652362	0.0432077	0.56043	0.310861	0.507095	0.00445457	0.998622	0.913958	0.793735	0.875188	0.775159	0.703418	0.737131	0.999932	0.971165	1	0.0798544	0.0197834	0.866528	0.611505	0.195206	0.999441	0.102365	0.800021	0.166228	0.52899	0.995606	0.65561	0.586726	0.883589	0.19086
0610010K14Rik	0.571036	0.0558579	0.452741	0.290656	0.615776	0.459114	0.0854344	0.948409	0.514265	0.751106	0.997582	0.976655	0.997331	0.901424	0.320588	0.0617351	0.273124	0.038705	0.0974403	0.373287	0.477781	0.6724	0.367797	0.462922	0.998622	0.650445	0.955487	0.83665	0.982193	0.396534	0.69698	0.999932	0.884555	1	0.0692173	0.589911	0.371868	0.598313	0.843781	0.999441	0.365207	0.0628267	0.0449163	0.730614	0.893282	0.490758	0.597297	0.889255	0.659206
Coro7	0.769085	0.742813	0.0254193	0.809282	0.89001	0.407548	0.461393	0.984618	0.971497	0.241615	0.997582	0.998041	0.997331	0.906302	0.35358	0.485419	0.894183	0.167699	0.375386	0.537731	0.808166	0.682665	0.819411	0.943993	0.998622	0.824918	0.965098	0.953409	0.790584	0.771307	0.768274	0.999932	0.987566	1	0.236818	0.865417	0.207692	0.735912	0.96855	0.999441	0.901701	0.3689	0.443614	0.960587	0.990195	0.808759	0.356627	0.772425	0.239754
Ccdc127	0.724108	0.392745	0.587344	0.669782	0.868942	0.260448	0.291214	0.978383	0.883019	0.822317	0.997582	0.993198	0.997331	0.901424	0.525986	0.516244	0.130644	0.409891	0.467846	0.080922	0.971127	0.790704	0.834114	0.288682	0.998622	0.849082	0.888297	0.994622	0.727483	0.880877	0.297142	0.999932	0.987566	1	0.209326	0.288126	0.491132	0.712096	0.676833	0.999441	0.879714	0.191331	0.636492	0.957349	0.990195	0.889159	0.605672	0.894667	0.830877
Dynlt2b	0.8148	0.252217	0.664944	0.365278	0.375246	0.730659	0.751338	0.987845	0.826942	0.863944	0.997582	0.953233	0.997331	0.9573	0.166991	0.974687	0.60403	0.991425	0.590111	0.277449	0.146456	0.580188	0.999044	0.747188	0.999529	0.899727	0.955487	0.630949	0.526918	0.343414	0.700136	0.999932	0.86485	1	0.16993	0.422854	0.323579	0.675118	0.753919	0.999441	0.582573	0.469519	0.298526	0.8219	0.990195	0.756326	0.880207	0.956884	0.791293
0610012G03Rik	0.234188	0.790646	0.711964	0.54586	0.404194	0.776609	0.0797901	0.922239	0.978686	0.890784	0.997582	0.955323	0.997331	0.901424	0.561426	0.305708	0.971283	0.33722	0.200857	0.277022	0.196351	0.804679	0.722299	0.986322	0.998622	0.743348	0.955487	0.679059	0.703176	0.601884	0.33586	0.999932	0.942061	1	0.651661	0.100016	0.794789	0.891712	0.451805	0.999441	0.246976	0.989579	0.166767	0.678136	0.997863	0.656724	0.356992	0.772425	0.664467
Limd2	0.767535	0.723462	0.0277397	0.839058	0.872915	0.880895	0.206543	0.984016	0.966468	0.252507	0.997582	0.994278	0.997331	0.901424	0.102798	0.556437	0.57712	0.559548	0.0364642	0.798151	0.351695	0.520853	0.849877	0.727592	0.998622	0.528086	0.985168	0.781863	0.900911	0.86722	0.485375	0.999932	0.987566	1	0.0122107	0.38861	0.913892	0.439299	0.734981	0.999441	0.757751	0.716204	0.28648	0.922749	0.995606	0.751147	0.123963	0.741388	0.582056
Neurl4	0.836804	0.574443	0.389871	0.0305899	0.138492	0.891541	0.781375	0.990768	0.932234	0.708371	0.997582	0.953233	0.997331	0.962759	0.566638	0.296676	2.40072e-06	0.506602	0.247184	0.953901	0.0869833	0.80703	0.716022	6.61782e-05	0.998622	0.763818	0.998116	0.541486	0.405724	0.749608	0.166462	0.999932	0.985302	1	0.651223	0.684613	0.506745	0.891706	0.89816	0.999441	0.195664	0.629552	0.0720693	0.635838	0.995606	0.557938	0.999932	0.999995	0.770499
Tmem42	0.181234	0.497641	0.919779	0.27741	0.219841	0.372879	0.183211	0.922239	0.917585	0.972726	0.997582	0.953233	0.997331	0.901424	0.399573	0.324714	0.968279	0.082312	0.0108976	0.446898	0.232625	0.71217	0.727781	0.9843	0.998622	0.381202	0.955487	0.705589	0.922251	0.378427	0.933058	0.999932	0.876191	1	0.309324	0.161429	0.550008	0.744474	0.545642	0.999441	0.0314391	0.764411	0.0402426	0.432389	0.995606	0.485478	0.813617	0.945156	0.348982
Zfp414	0.507069	0.647659	0.0830364	0.0817923	0.424453	0.661423	0.131959	0.947805	0.945347	0.41839	0.997582	0.955323	0.997331	0.901424	0.24126	0.270064	0.459328	0.484892	0.0441889	0.24789	0.0177606	0.628383	0.698763	0.629948	0.998622	0.565907	0.955487	0.333233	0.47292	0.617785	0.101727	0.999932	0.947074	1	0.566618	0.201067	0.321443	0.849058	0.597479	0.999441	0.0239078	0.763286	0.0220424	0.424825	0.995606	0.427996	0.305962	0.772425	0.378734
Glmp	0.663186	0.444572	0.686088	0.325669	0.844738	0.682689	0.126677	0.966744	0.904148	0.875492	0.997582	0.992504	0.997331	0.901424	0.529328	0.0900004	0.0119302	0.460129	0.147668	0.270748	0.00350132	0.791802	0.450451	0.0538379	0.998622	0.698686	0.955487	0.239344	0.898614	0.511148	0.790219	0.999932	0.931796	1	0.127811	0.0601856	0.142528	0.652814	0.352931	0.999441	0.468212	0.72735	0.0123698	0.791814	0.995606	0.391607	0.462425	0.794506	0.79326
Aurkaip1	0.0702314	0.315119	0.246803	0.683769	0.0127508	0.85734	0.954204	0.922239	0.863319	0.622637	0.997582	0.953233	0.997331	0.992972	0.155129	0.202016	0.018257	0.940412	0.0236576	0.97739	0.861153	0.56755	0.629673	0.0733088	0.998622	0.471127	0.998638	0.968805	0.564771	0.565269	0.741464	0.999932	0.933345	1	0.524008	0.545166	0.953841	0.837584	0.823318	0.999441	0.0143201	0.546536	0.772302	0.386644	0.995606	0.92866	0.602666	0.891919	0.429598
Tsen54	0.234257	0.575286	0.0778344	0.256086	0.752309	0.441788	0.239225	0.922239	0.932234	0.407147	0.997582	0.980091	0.997331	0.901424	0.335574	0.0639848	0.162235	0.741512	0.0115494	0.786214	0.0193107	0.67617	0.374273	0.330447	0.998622	0.382031	0.984601	0.339926	0.581361	0.901043	0.982802	0.999932	0.987566	1	0.0162093	0.368277	0.205937	0.451514	0.720925	0.999441	0.184585	0.242061	0.0510857	0.626042	0.990195	0.517801	0.115318	0.741388	0.914007
Ccdc163	0.303886	0.340792	0.327474	0.418928	0.312457	0.461724	0.334511	0.922239	0.869309	0.681129	0.997582	0.953233	0.997331	0.901424	0.299666	0.33631	0.330572	0.387808	0.362324	0.408276	0.335378	0.663921	0.736457	0.515405	0.998622	0.819287	0.955487	0.77769	0.86327	0.0142292	0.236033	0.999932	0.296564	1	0.673578	0.72089	0.227797	0.904536	0.915574	0.999441	0.319286	0.446642	0.399887	0.711567	0.990195	0.797397	0.0625503	0.741388	0.333703
Gtpbp8	0.440922	0.929172	0.432994	0.106968	0.417008	0.0717979	0.0911338	0.939485	0.992776	0.736346	0.997582	0.955323	0.997331	0.901424	0.602816	0.101075	0.552775	0.519243	0.645052	0.545288	0.693388	0.825714	0.473974	0.708782	0.998622	0.912323	0.965098	0.921298	0.28136	0.202961	0.0318906	0.999932	0.818398	1	0.330517	0.363554	0.351056	0.753353	0.718651	0.999441	0.944937	0.218001	0.889725	0.973553	0.990195	0.968901	0.301409	0.772425	0.0409595
Czib	0.894536	0.680129	0.362579	0.592796	0.541542	0.686889	0.124515	0.993268	0.951371	0.697263	0.997582	0.970282	0.997331	0.901424	0.226294	0.515644	0.295914	0.073833	0.058923	0.0976805	0.547221	0.617043	0.834114	0.484955	0.998622	0.599433	0.899663	0.868751	0.743386	0.999739	0.520723	0.999932	1	1	0.0362381	0.079612	0.399227	0.523835	0.406469	0.999441	0.563051	0.575364	0.13302	0.808686	0.995606	0.63513	0.725473	0.92233	0.245504
Sdhaf2	0.737326	0.536307	0.302209	0.246436	0.0412517	0.757742	0.755837	0.979216	0.928595	0.666596	0.997582	0.953233	0.997331	0.958229	0.217129	0.084243	0.944766	0.76401	0.732912	0.302732	0.419721	0.610391	0.436059	0.972515	0.998622	0.947114	0.955487	0.808889	0.208118	0.888573	0.261796	0.999932	0.987566	1	0.660645	0.110811	0.530453	0.896763	0.472618	0.999441	0.114044	0.600557	0.589177	0.544927	0.995606	0.873998	0.706864	0.916451	0.648551
Cuta	0.325647	0.478749	0.344388	0.921945	0.651269	0.450878	0.729238	0.922239	0.914906	0.689017	0.997582	0.977609	0.997331	0.953079	0.459167	0.646124	0.635353	0.721611	0.445611	0.322201	0.991692	0.752457	0.888573	0.772016	0.998622	0.846424	0.955487	0.997647	0.675786	0.982943	0.761192	0.999932	0.997256	1	0.966339	0.791881	0.825905	0.990632	0.948078	0.999441	0.321091	0.284454	0.854392	0.712371	0.990195	0.962574	0.162971	0.764055	0.864843
Setd6	0.134826	0.807284	0.119889	0.58082	0.844877	0.976795	0.358312	0.922239	0.982719	0.484404	0.997582	0.992504	0.997331	0.901424	0.389028	0.139805	0.581127	0.590018	0.486253	0.105587	0.338563	0.705005	0.548027	0.729805	0.998622	0.85824	0.904506	0.778654	0.173274	0.814	0.796684	0.999932	0.987566	1	0.718862	0.0139713	0.770201	0.928603	0.159507	0.999441	0.431671	0.887089	0.364567	0.769928	0.995606	0.785152	0.673793	0.912379	0.287643
Retsat	0.726604	0.0144861	0.606164	0.569421	0.791778	0.847949	0.836599	0.978876	0.258876	0.829878	0.997582	0.985642	0.997331	0.977551	0.65896	0.037027	0.829762	0.191253	0.744873	0.648132	0.679026	0.860231	0.289082	0.905719	0.998622	0.948883	0.974689	0.91576	0.772039	0.0786822	0.800352	0.999932	0.640776	1	0.454789	0.241137	0.243953	0.821353	0.64422	0.999441	0.84912	0.0875766	0.549678	0.950065	0.938138	0.854698	0.783332	0.942998	0.97622
Hvcn1	0.733747	0.629943	0.0375465	0.897554	0.623128	0.338265	0.418517	0.979206	0.942009	0.295359	0.997582	0.976655	0.997331	0.901424	0.145589	0.304817	0.398292	0.778067	0.701861	0.408689	0.597208	0.558125	0.721732	0.572819	0.998622	0.933856	0.955487	0.890361	0.94493	0.787797	0.537337	0.999932	0.987566	1	0.135512	0.897563	0.874689	0.656086	0.973202	0.999441	0.551016	0.274958	0.599272	0.801611	0.990195	0.877165	0.0470633	0.741388	0.618221
Txndc12	0.576538	0.832706	0.096722	0.420927	0.353091	0.691773	0.874664	0.948409	0.985535	0.448368	0.997582	0.953233	0.997331	0.982995	0.229241	0.505943	0.898317	0.508924	0.986087	0.875282	0.880251	0.61863	0.830602	0.946339	0.998622	0.998301	0.994278	0.974027	0.77206	0.853347	0.572725	0.999932	0.987566	1	0.434421	0.568355	0.711354	0.806685	0.837329	0.999441	0.361575	0.743963	0.572649	0.729522	0.995606	0.866025	0.582255	0.880833	0.805841
Sharpin	0.345561	0.543992	0.984072	0.502438	0.263193	0.8605	0.524257	0.922239	0.929315	0.993585	0.997582	0.953233	0.997331	0.916218	0.492019	0.727097	0.489776	0.945407	0.100579	0.495895	0.96584	0.773646	0.919441	0.658076	0.998895	0.651955	0.959946	0.993387	0.92414	0.810621	0.406172	0.999932	0.987566	1	0.512255	0.70425	0.952924	0.834944	0.909559	0.999441	0.103801	0.567903	0.997845	0.531622	0.995606	0.998802	0.562783	0.866247	0.733332
Tmem167	0.782352	0.210317	0.852374	0.191578	0.965569	0.134347	0.940605	0.987567	0.803938	0.951149	0.997582	0.999856	0.997331	0.992578	0.114633	0.204711	0.366597	0.466829	0.0546193	0.0728755	0.61561	0.529281	0.633389	0.546119	0.998622	0.593935	0.881503	0.895224	0.834873	0.0951994	0.379491	0.999932	0.680886	1	0.0363537	0.0347612	0.792705	0.523894	0.267938	0.999441	0.857421	0.753723	0.331789	0.952735	0.995606	0.774493	0.440981	0.780828	0.428525
Acta2	0.13634	7.6e-07	0.572948	0.439008	0.504875	0.97422	0.415336	0.922239	8.31e-05	0.8154	0.997582	0.966195	0.997331	0.901424	0.151582	1.83891e-06	0.62901	0.253483	0.244406	0.345573	0.277148	0.564937	0.000157143	0.767185	0.998622	0.762157	0.955487	0.75395	0.372349	0.00022988	0.256372	0.999932	0.0211805	1	0.451902	0.000305763	0.059324	0.819072	0.0133625	0.999441	0.223862	0.00113656	0.972607	0.661656	0.0945055	0.991671	0.705146	0.915475	0.692939
Dusp28	0.17537	0.539049	0.815153	0.419081	0.556313	0.951279	0.0435294	0.922239	0.928595	0.938692	0.997582	0.970733	0.997331	0.901424	0.428994	0.144525	0.0464076	0.0638153	0.0435244	0.574828	0.0243727	0.732301	0.556429	0.142653	0.998622	0.565339	0.968564	0.369457	0.637419	0.70838	0.501479	0.999932	0.972728	1	0.375309	0.183052	0.92377	0.763576	0.576341	0.999441	0.0591223	0.606015	0.00844991	0.469305	0.995606	0.386631	0.486389	0.811114	0.35993
Ilkap	0.313478	0.204121	0.506374	0.818839	0.282088	0.0698601	0.798179	0.922239	0.796815	0.784816	0.997582	0.953233	0.997331	0.966119	0.947953	0.354899	0.818691	0.86383	0.894093	0.133798	0.540108	0.983311	0.749505	0.899871	0.998622	0.988132	0.946526	0.864235	0.13085	0.0401996	0.983358	0.999932	0.482498	1	0.828643	0.109841	0.608854	0.970291	0.469763	0.999441	0.88944	0.610894	0.724322	0.958009	0.995606	0.917738	0.081279	0.741388	0.948972
Naxd	0.451501	0.0993967	0.815564	0.829194	0.0414284	0.671336	0.691508	0.943461	0.647714	0.938692	0.997582	0.953233	0.997331	0.946156	0.168122	0.116973	0.353993	0.791947	0.174434	0.609646	0.467682	0.580188	0.506053	0.534716	0.998622	0.719938	0.969727	0.832047	0.367265	0.0882143	0.913101	0.999932	0.661694	1	0.837673	0.105921	0.530524	0.973337	0.461611	0.999441	0.094395	0.413035	0.687612	0.524699	0.990195	0.907085	0.503876	0.824781	0.146237
Cyrib	0.26091	0.345929	0.400542	0.956277	0.059134	0.829378	0.878659	0.922239	0.871791	0.714033	0.997582	0.953233	0.997331	0.982995	0.00847202	0.77644	0.612655	0.154314	0.614942	0.657546	0.223418	0.290542	0.936111	0.753977	0.998622	0.905743	0.975567	0.69912	0.595356	0.47168	0.875449	0.999932	0.925959	1	0.115955	0.872686	0.0700623	0.640139	0.970064	0.999441	0.0361709	0.677076	0.953113	0.432389	0.995606	0.988378	0.132442	0.741388	0.230744
Lamtor4	0.452076	0.791756	0.336232	0.81428	0.691719	0.448479	0.620838	0.943461	0.978686	0.685344	0.997582	0.977609	0.997331	0.934015	0.53871	0.90669	0.757301	0.593095	0.767803	0.367653	0.827252	0.794615	0.9904	0.860361	0.998622	0.953666	0.955487	0.958719	0.367721	0.706715	0.852808	0.999932	0.972573	1	0.478446	0.539848	0.779146	0.827006	0.819985	0.999441	0.840866	0.517441	0.6414	0.948777	0.995453	0.893226	0.987998	0.994835	0.244639
Aste1	0.526688	0.36439	0.97183	0.423003	0.747261	0.909364	0.0547702	0.947805	0.873319	0.988124	0.997582	0.979323	0.997331	0.901424	0.342817	0.117921	0.15119	0.245962	0.722319	0.712288	0.010603	0.678789	0.507303	0.316829	0.998622	0.943289	0.981634	0.289189	0.846205	0.501973	0.481534	0.999932	0.931186	1	0.551524	0.0574354	0.151386	0.846464	0.344899	0.999441	0.455264	0.571235	0.0473888	0.785325	0.995606	0.50013	0.512422	0.830762	0.383829
Ankrd13a	0.907529	0.85196	0.0902424	0.448596	0.613516	0.60031	0.273675	0.993268	0.987719	0.432354	0.997582	0.976655	0.997331	0.901424	0.443041	0.545565	0.863017	0.628815	0.156594	0.706795	0.115561	0.742114	0.845345	0.926174	0.998622	0.707344	0.981634	0.586936	0.813101	0.816528	0.858459	0.999932	0.987566	1	0.119983	0.947488	0.491623	0.648232	0.985018	0.999441	0.613024	0.581844	0.152153	0.840013	0.995606	0.640965	0.171881	0.764055	0.939843
Wfdc21	0.000769648	0.000446327	0.000179959	0.00371836	0.000632461	0.00126954	0.00277146	0.26465	0.0195405	0.0134764	0.997582	0.953233	0.780152	0.901424	0.000584141	0.000531248	0.000120231	0.00802121	0.000880927	0.00110887	0.00209735	0.130233	0.0157337	0.00153347	0.998622	0.213207	0.143715	0.239344	0.712984	0.0868823	0.58572	0.999932	0.659503	1	0.521802	0.0719988	0.559891	0.837376	0.38857	0.999441	0.00225258	0.00345654	0.00811964	0.305832	0.20819	0.386631	0.142835	0.754603	0.0039333
Rpl34	0.642255	0.615366	0.479516	0.613064	0.68382	0.212983	0.241881	0.960186	0.93807	0.769846	0.997582	0.977609	0.997331	0.901424	0.131641	0.720585	0.112168	0.147494	0.621595	0.199866	0.508337	0.541782	0.915924	0.261021	0.998622	0.905791	0.955487	0.850435	0.977868	0.287888	0.688451	0.999932	0.858964	1	0.16308	0.244649	0.502594	0.668817	0.647998	0.999441	0.460416	0.487536	0.178679	0.788565	0.993316	0.669035	0.127431	0.741388	0.611573
Pdlim5	0.0863735	0.497053	0.552136	0.333705	0.823538	0.627866	0.345343	0.922239	0.917585	0.80704	0.997582	0.989556	0.997331	0.901424	0.0806351	0.650929	0.676355	0.969679	0.46666	0.075392	0.0183213	0.491819	0.891294	0.804776	0.998895	0.849082	0.883963	0.335074	0.340459	0.87668	0.9519	0.999932	0.987566	1	0.462163	0.164259	0.12476	0.822947	0.550028	0.999441	0.0814217	0.266187	0.0750685	0.509549	0.990195	0.561349	0.266048	0.772425	0.928246
Ska2	0.820884	0.200359	0.802286	0.953642	0.227781	0.85122	0.815896	0.988275	0.795682	0.93444	0.997582	0.953233	0.997331	0.970481	0.51014	0.500954	0.0725911	0.775575	0.413768	0.421661	0.83378	0.783405	0.828768	0.194293	0.998622	0.837463	0.955487	0.960777	0.359289	0.276198	0.902749	0.999932	0.858964	1	0.187041	0.000369006	0.429928	0.695977	0.0150094	0.999441	0.50475	0.428831	0.839406	0.794754	0.990195	0.956265	0.394614	0.772425	0.549728
Kti12	0.225545	0.503495	0.35436	0.275478	0.133228	0.648546	0.864358	0.922239	0.92107	0.694531	0.997582	0.953233	0.997331	0.981302	0.523103	0.980842	0.0765878	0.67554	0.0212925	0.92984	0.669274	0.789298	0.999044	0.201716	0.998622	0.459151	0.996665	0.911286	0.897788	0.365437	0.338094	0.999932	0.873844	1	0.159823	0.90661	0.8607	0.667951	0.976092	0.999441	0.0900681	0.869523	0.554911	0.5224	0.995606	0.857726	0.396254	0.772425	0.24554
Tmem126b	0.176199	0.189738	0.459159	0.992901	0.926754	0.970163	0.392328	0.922239	0.786047	0.755986	0.999173	0.999856	0.997331	0.901424	0.198167	0.146471	0.178774	0.49578	0.86907	0.920052	0.83652	0.592515	0.56002	0.352152	0.998622	0.980001	0.996665	0.961517	0.205986	0.208624	0.448686	0.999932	0.822765	1	0.25012	0.171082	0.639577	0.740575	0.561601	0.999441	0.448283	0.476867	0.612061	0.779579	0.990674	0.880423	0.97629	0.989734	0.419683
Bpnt2	0.812633	0.571663	0.078521	0.496229	0.945526	0.49909	0.458395	0.987845	0.931777	0.408815	0.997582	0.999856	0.997331	0.905427	0.242248	0.78893	0.999417	0.44611	0.183506	0.577017	0.444855	0.629132	0.941468	0.999523	0.998622	0.724903	0.968564	0.821674	0.828087	0.452678	0.990364	0.999932	0.921236	1	0.131019	0.528754	0.926325	0.653427	0.815524	0.999441	0.913848	0.882967	0.216939	0.963433	0.995606	0.698788	0.0613276	0.741388	0.806674
Tmem38a	0.404947	0.442765	0.203056	0.541266	0.103532	0.778746	0.12589	0.924836	0.903613	0.590936	0.997582	0.953233	0.997331	0.901424	0.919917	0.104773	0.184675	0.546194	0.1264	0.428891	0.386759	0.975514	0.480945	0.358667	0.998622	0.689355	0.955487	0.797041	0.65382	0.817947	0.628529	0.999932	0.987566	1	0.405078	0.215712	0.961948	0.785901	0.61482	0.999441	0.0119272	0.306563	0.0252625	0.369861	0.990195	0.439922	0.49556	0.817971	0.361937
Fmc1	0.599574	0.721628	0.553773	0.251549	0.906955	0.784697	0.371336	0.948449	0.966018	0.807834	0.997582	0.999354	0.997331	0.901424	0.966554	0.516313	0.40413	0.486894	0.509405	0.975356	0.193198	0.989725	0.834114	0.57807	0.998622	0.86449	0.998638	0.676173	0.764393	0.944867	0.821653	0.999932	0.988519	1	0.657527	0.625753	0.687954	0.89564	0.863329	0.999441	0.65432	0.640045	0.156704	0.866126	0.995606	0.645784	0.777946	0.942998	0.405094
Nudt16l1	0.0841074	0.370309	0.653533	0.290034	0.361048	0.515747	0.0137463	0.922239	0.874038	0.85799	0.997582	0.953233	0.997331	0.901424	0.000912891	0.0819394	0.125682	0.138804	0.551609	0.853364	0.0105252	0.158911	0.428144	0.281287	0.998622	0.882066	0.990118	0.289189	0.479552	0.854435	0.271853	0.999932	0.987566	1	0.000438329	0.0364305	0.263312	0.142018	0.273185	0.999441	0.109181	0.359076	0.0344321	0.538498	0.990195	0.471545	0.266657	0.772425	0.205702
Sptssa	0.224699	0.900974	0.199696	0.348651	0.370238	0.805048	0.410276	0.922239	0.991833	0.588628	0.997582	0.953233	0.997331	0.901424	0.139696	0.23176	0.852015	0.356745	0.66168	0.45419	0.392656	0.551507	0.668134	0.919828	0.998622	0.919284	0.9557	0.797656	0.771979	0.90049	0.89361	0.999932	0.987566	1	0.483228	0.159406	0.94612	0.831273	0.542823	0.999441	0.186416	0.846731	0.272605	0.627845	0.995606	0.742088	0.938213	0.974181	0.582108
Tomm6	0.268546	0.457972	0.778452	0.448964	0.681554	0.988603	0.121296	0.922239	0.910369	0.924037	0.997582	0.977609	0.999056	0.901424	0.59446	0.262849	0.0137047	0.20691	0.941432	0.924352	0.167341	0.822117	0.693844	0.0595032	0.998622	0.995166	0.996665	0.649991	0.257789	0.527624	0.572641	0.999932	0.932406	1	0.784875	0.301693	0.971942	0.957383	0.683743	0.999441	0.647022	0.648894	0.146686	0.861854	0.995606	0.638946	0.204587	0.767331	0.537077
Tefm	0.835773	0.664099	0.671145	0.60488	0.679389	0.992003	0.650983	0.990768	0.949109	0.8679	0.997582	0.977609	0.999056	0.940065	0.64591	0.370261	0.00615488	0.745132	0.954575	0.715138	0.297543	0.853309	0.757078	0.0327775	0.998622	0.996192	0.981634	0.761193	0.722592	0.77526	0.954297	0.999932	0.987566	1	0.623192	0.274983	0.606586	0.879675	0.670276	0.999441	0.8524	0.683481	0.376331	0.950528	0.995606	0.787721	0.508157	0.827582	0.865499
Zfp579	0.232647	0.00837334	0.445891	0.532853	0.937347	0.745759	0.838502	0.922239	0.182435	0.747259	0.997582	0.999856	0.997331	0.977551	0.27744	0.0175988	0.818514	0.427722	0.807222	0.767201	0.844685	0.649494	0.188201	0.899864	0.998622	0.964093	0.982079	0.96465	0.351898	0.0557532	0.771633	0.999932	0.553764	1	0.432902	0.117786	0.667111	0.805834	0.484021	0.999441	0.460682	0.0719865	0.511579	0.788694	0.905205	0.835819	0.690996	0.912379	0.688711
Smim14	0.270076	0.447838	0.0547032	0.46634	0.431411	0.376756	0.385045	0.922239	0.904849	0.350997	0.997582	0.955323	0.997331	0.901424	0.53285	0.0486943	0.521161	0.897381	0.292238	0.835357	0.812239	0.793091	0.324169	0.68392	0.998622	0.792669	0.988474	0.953549	0.804452	0.928325	0.240827	0.999932	0.988291	1	0.647356	0.128087	0.834384	0.89038	0.505716	0.999441	0.21379	0.307734	0.896491	0.653184	0.990195	0.971225	0.255294	0.772425	0.789644
Tmem107	0.829064	0.0721368	0.601024	0.763764	0.908244	0.1208	0.329732	0.989406	0.573064	0.828771	0.997582	0.999354	0.997331	0.901424	0.324883	0.125398	0.259523	0.38396	0.617715	0.0597459	0.92656	0.672813	0.520645	0.447372	0.998622	0.905791	0.844115	0.980459	0.892809	0.811362	0.449549	0.999932	0.987566	1	0.297669	0.810351	0.54873	0.744474	0.95632	0.999441	0.856869	0.0102616	0.52388	0.952574	0.397567	0.842616	0.389343	0.772425	0.995566
1110004F10Rik	0.952816	0.451177	0.455097	0.0544852	0.113194	0.789464	0.11623	0.995715	0.907374	0.752385	0.997582	0.953233	0.997331	0.901424	0.532596	0.753494	0.464054	0.0320554	0.412789	0.519225	0.17984	0.793091	0.927195	0.633383	0.998622	0.836958	0.964338	0.665455	0.299085	0.782457	0.757807	0.999932	0.987566	1	0.831385	0.828483	0.562027	0.970514	0.960187	0.999441	0.171435	0.459647	0.00875887	0.614359	0.990195	0.386631	0.0675884	0.741388	0.581819
Fam98c	0.127439	0.595715	0.313745	0.847851	0.53983	0.379127	0.314178	0.922239	0.934256	0.673066	0.997582	0.970282	0.997331	0.901424	0.543708	0.791885	0.29302	0.362538	0.534998	0.837011	0.889491	0.796953	0.942677	0.48238	0.998622	0.877438	0.988543	0.976549	0.120023	0.28965	0.386177	0.999932	0.858964	1	0.900262	0.916729	0.331815	0.980711	0.978133	0.999441	0.548858	0.806767	0.570382	0.801036	0.995606	0.864405	0.153512	0.764055	0.500011
Tmem109	0.857684	0.373509	0.231322	0.509212	0.857293	0.716766	0.774434	0.993268	0.874038	0.610674	0.997582	0.992504	0.997331	0.96114	0.844079	0.691715	0.685741	0.765267	0.811059	0.320542	0.471643	0.947804	0.907752	0.810915	0.998622	0.965008	0.955487	0.83295	0.98099	0.693892	0.771128	0.999932	0.968472	1	0.968097	0.619487	0.755144	0.991188	0.859415	0.999441	0.777939	0.404857	0.526146	0.9312	0.990195	0.843856	0.307936	0.772425	0.823948
Mcmbp	0.934633	0.940484	0.985504	0.91474	0.778764	0.279024	0.461012	0.995432	0.993072	0.994092	0.997582	0.983105	0.997331	0.906302	0.251252	0.951786	0.916782	0.80139	0.367773	0.275796	0.721658	0.636007	0.999044	0.957421	0.998622	0.82187	0.955487	0.927636	0.783634	0.401785	0.523322	0.999932	0.890679	1	0.123645	0.388807	0.980299	0.652383	0.735119	0.999441	0.891259	0.492025	0.677394	0.958009	0.993316	0.907085	0.278086	0.772425	0.520526
Arsb	0.377083	0.73881	0.0218926	0.889573	0.236523	0.478093	0.78163	0.922239	0.970889	0.222668	0.997582	0.953233	0.997331	0.962759	0.0698462	0.020296	0.904728	0.494925	0.910506	0.2325	0.439693	0.477398	0.203632	0.949899	0.998622	0.9891	0.955487	0.818202	0.85756	0.770146	0.78111	0.999932	0.987566	1	0.28847	0.0164176	0.306111	0.744347	0.173728	0.999441	0.142665	0.485947	0.909392	0.587251	0.992988	0.97679	0.219887	0.772425	0.852459
Josd2	0.581774	0.554289	0.585205	0.915018	0.811647	0.606247	0.544363	0.948409	0.929315	0.821301	0.997582	0.987287	0.997331	0.923149	0.464709	0.457393	0.360209	0.710915	0.123133	0.778282	0.592214	0.756802	0.807845	0.540458	0.998622	0.6881	0.983221	0.888024	0.80018	0.930615	0.739932	0.999932	0.988291	1	0.111002	0.577928	0.848241	0.635184	0.839592	0.999441	0.595154	0.426359	0.60447	0.830669	0.990195	0.877564	0.253544	0.772425	0.911542
Maco1	0.0233275	0.627297	0.00181704	0.612791	0.425579	0.00460501	0.481043	0.836942	0.940145	0.0564714	0.997582	0.955323	0.997331	0.908628	0.00211943	0.00830731	0.000211968	0.103998	0.550046	0.896736	0.193088	0.187648	0.119219	0.00237485	0.998622	0.880674	0.995417	0.676173	0.293025	0.0392763	0.328445	0.999932	0.480624	1	0.0094658	0.0740463	0.0333189	0.43824	0.395315	0.999441	0.0546498	0.0934045	0.824221	0.461844	0.966492	0.951561	0.00833997	0.486037	0.852931
Tmem140	0.217465	0.385521	0.0979507	0.11027	0.166183	0.538507	0.310023	0.922239	0.879182	0.451563	0.997582	0.953233	0.997331	0.901424	0.198556	0.331656	0.0585698	0.937694	0.25772	0.538918	0.739149	0.593029	0.732511	0.167444	0.998622	0.769558	0.965098	0.930918	0.923131	0.872922	0.047486	0.999932	0.987566	1	0.911356	0.907878	0.903652	0.983067	0.976092	0.999441	0.108623	0.379188	0.744497	0.538498	0.990195	0.922684	0.0904859	0.741388	0.243274
Get4	0.651668	0.480878	0.230444	0.599426	0.85143	0.729792	0.975429	0.961872	0.915137	0.610181	0.997582	0.992504	0.997331	0.99669	0.244188	0.603426	0.495353	0.954648	0.330564	0.352548	0.635555	0.629904	0.868533	0.662824	0.998895	0.809244	0.955487	0.902481	0.643838	0.484484	0.707007	0.999932	0.927229	1	0.164645	0.282685	0.753702	0.668817	0.673841	0.999441	0.880964	0.816248	0.724615	0.957349	0.995606	0.917738	0.370091	0.772425	0.495077
Ndufaf4	0.199164	0.901338	0.597033	0.235146	0.781423	0.85166	0.266572	0.922239	0.991833	0.825928	0.997582	0.983577	0.997331	0.901424	0.184851	0.271256	0.0212675	0.27715	0.516444	0.316511	0.0641647	0.586598	0.70032	0.081865	0.998622	0.867818	0.955487	0.496018	0.524251	0.840836	0.923257	0.999932	0.987566	1	0.64812	0.159264	0.666993	0.89038	0.542823	0.999441	0.148069	0.942876	0.0363346	0.589267	0.996237	0.472169	0.255382	0.772425	0.765452
Rab5if	0.430745	0.3344	0.432063	0.690435	0.962237	0.950501	0.990816	0.932489	0.867373	0.735892	0.997582	0.999856	0.997331	0.99826	0.970236	0.877355	0.996155	0.311427	0.457814	0.365891	0.515692	0.990375	0.981686	0.997854	0.998622	0.847548	0.955487	0.853211	0.47528	0.35973	0.713503	0.999932	0.869267	1	0.594987	0.428293	0.150458	0.866476	0.758971	0.999441	0.659135	0.610018	0.826104	0.868737	0.995606	0.952051	0.681341	0.912379	0.692137
Rita1	0.440128	0.1012	0.189792	0.694436	0.252864	0.687859	0.59819	0.939485	0.649335	0.580095	0.997582	0.953233	0.997331	0.930599	0.111128	0.126066	0.601579	0.464578	0.341428	0.962252	0.350126	0.525191	0.52203	0.745529	0.998622	0.810029	0.998116	0.781628	0.897357	0.194091	0.577551	0.999932	0.810523	1	0.501968	0.263547	0.23976	0.834944	0.661771	0.999441	0.116943	0.265684	0.885106	0.550342	0.990195	0.968337	0.927877	0.970591	0.824253
Bbln	0.957084	0.103617	0.205348	0.99751	0.687393	0.0260529	0.667353	0.996603	0.653425	0.592635	0.99988	0.977609	0.997331	0.941372	0.882575	0.743016	0.0843607	0.59924	0.898544	0.565491	0.340272	0.96185	0.924088	0.21535	0.998622	0.988132	0.968564	0.778654	0.822758	0.0170943	0.796567	0.999932	0.319387	1	0.975816	0.818146	0.324963	0.992506	0.957919	0.999441	0.845336	0.557348	0.723019	0.948998	0.995606	0.917738	0.171506	0.764055	0.561993
Hhatl	0.236863	0.984922	0.270193	0.0540486	0.279374	0.836697	0.0304866	0.922239	0.997352	0.643368	0.997582	0.953233	0.997331	0.901424	0.262262	0.834212	0.217036	0.432296	0.285163	0.706853	0.00359689	0.641829	0.963459	0.399948	0.998622	0.787003	0.981634	0.239344	0.902481	0.940282	0.952352	0.999932	0.988291	1	0.929558	0.752473	0.202455	0.984959	0.932751	0.999441	0.0764319	0.843701	0.00305564	0.497388	0.995606	0.372674	0.379316	0.772425	0.325096
Elof1	0.107329	0.103586	0.431045	0.13435	0.156081	0.536397	0.126974	0.922239	0.653425	0.735092	0.997582	0.953233	0.997331	0.901424	0.780262	0.116984	0.114867	0.63946	0.0499648	0.61228	0.0830878	0.924566	0.506053	0.265622	0.998622	0.586175	0.970623	0.53605	0.851269	0.0651941	0.924549	0.999932	0.593696	1	0.239295	0.242394	0.476457	0.736215	0.645409	0.999441	0.0808239	0.603087	0.0865972	0.508963	0.995606	0.579859	0.880177	0.956884	0.563074
Tmem198b	0.937467	0.0158689	0.099506	0.372446	0.113788	0.340805	0.638109	0.995432	0.270721	0.454719	0.997582	0.953233	0.997331	0.937222	0.103241	0.773875	0.787822	0.909986	0.939792	0.0461181	0.150025	0.521355	0.935214	0.880981	0.998622	0.994971	0.80468	0.63423	0.401629	0.0486269	0.781887	0.999932	0.521089	1	0.328617	0.178722	0.443622	0.752704	0.569825	0.999441	0.148624	0.116963	0.163472	0.589986	0.990195	0.651155	0.366706	0.772425	0.519502
Atp13a2	0.383361	0.942676	0.553367	0.12527	0.533882	0.371731	0.329512	0.923029	0.993072	0.80768	0.997582	0.969881	0.997331	0.901424	0.649274	0.567364	0.011421	0.425271	0.844565	0.786372	0.108163	0.855176	0.852114	0.0521153	0.998622	0.97386	0.984659	0.576864	0.213318	0.468419	0.568091	0.999932	0.924745	1	0.565107	0.705433	0.537054	0.848409	0.909559	0.999441	0.893485	0.560876	0.149465	0.958777	0.995606	0.638946	0.416641	0.772425	0.427502
Mtcl1	0.277434	0.205811	0.116301	0.0127283	0.0283212	0.458945	0.0950009	0.922239	0.797248	0.478228	0.997582	0.953233	0.997331	0.901424	0.00966051	0.120127	5.55725e-05	0.00130809	0.013137	0.0781524	0.00116057	0.292371	0.510952	0.000827863	0.998622	0.392229	0.887468	0.228914	0.495519	0.638608	0.497592	0.999932	0.952188	1	0.00248028	0.171947	0.821391	0.320098	0.562735	0.999441	0.0204122	0.11127	0.00510999	0.424822	0.990195	0.386631	0.00963768	0.486037	0.313697
Eola1	0.191752	0.681448	0.128464	0.589332	0.647764	0.681333	0.547761	0.922239	0.951729	0.499817	0.997582	0.977609	0.997331	0.924097	0.661316	0.922811	0.361206	0.708398	0.0634192	0.23043	0.920102	0.861467	0.994331	0.541286	0.998622	0.608905	0.955487	0.979139	0.58682	0.993471	0.494328	0.999932	0.999594	1	0.307838	0.328845	0.793194	0.744474	0.700323	0.999441	0.123319	0.474855	0.92513	0.561491	0.990195	0.980765	0.5992	0.889807	0.457465
Mvb12a	0.25692	0.270862	0.609107	0.0396118	0.285627	0.563973	0.308879	0.922239	0.84066	0.832398	0.997582	0.953233	0.997331	0.901424	0.965219	0.106687	0.000114511	0.145199	0.901694	0.476269	0.0425595	0.989461	0.485577	0.00147858	0.998622	0.988132	0.957632	0.433904	0.200154	0.275966	0.451573	0.999932	0.858964	1	0.907554	0.164556	0.741614	0.982367	0.550485	0.999441	0.927048	0.665223	0.0168498	0.968648	0.995606	0.39805	0.918367	0.966665	0.23009
Fam189b	0.0920787	0.0236732	0.271839	0.382171	0.90106	0.207353	0.837076	0.922239	0.339344	0.644755	0.997582	0.998565	0.997331	0.977551	0.369843	0.164402	0.422736	0.232634	0.555309	0.81128	0.636867	0.692121	0.582151	0.595492	0.998622	0.883831	0.985259	0.902948	0.19259	0.0108431	0.404308	0.999932	0.260642	1	0.923665	0.22973	0.205308	0.983967	0.631258	0.999441	0.284861	0.544083	0.693104	0.691408	0.995606	0.907472	0.350905	0.772425	0.994335
Nsmce2	0.936663	0.422422	0.0498461	0.721556	0.670031	0.442196	0.686003	0.995432	0.894844	0.336846	0.997582	0.977609	0.997331	0.945722	0.913384	0.61845	0.827218	0.312244	0.359739	0.0724883	0.926562	0.972721	0.875252	0.904799	0.998622	0.818786	0.881503	0.980459	0.829795	0.97143	0.988519	0.999932	0.995483	1	0.535462	0.381514	0.526287	0.840926	0.731221	0.999441	0.50768	0.0784966	0.370944	0.794754	0.923097	0.78583	0.420578	0.772425	0.0962969
Tmed4	0.602284	0.753446	0.160536	0.118391	0.0876331	0.996451	0.370043	0.949173	0.973122	0.549678	0.997582	0.953233	0.999056	0.901424	0.232565	0.95748	0.149826	0.182936	0.0866615	0.58346	0.115909	0.620526	0.999044	0.315141	0.998622	0.632924	0.968564	0.586936	0.459631	0.906729	0.606443	0.999932	0.987566	1	0.795207	0.497605	0.98252	0.961246	0.802828	0.999441	0.0845367	0.862408	0.0653231	0.515197	0.995606	0.541961	0.752059	0.934603	0.66459
Ints1	0.0552152	0.753225	0.245126	0.0343848	0.340487	0.498467	0.120458	0.922239	0.973122	0.621408	0.997582	0.953233	0.997331	0.901424	0.0851908	0.0532685	0.0308959	0.163689	0.115538	0.649596	0.00616648	0.498937	0.341089	0.107564	0.998622	0.672528	0.974887	0.253798	0.462979	0.779005	0.616765	0.999932	0.987566	1	0.900615	0.102987	0.334907	0.980711	0.458984	0.999441	0.0440577	0.468306	0.0127182	0.44039	0.990195	0.391607	0.321927	0.772425	0.406166
Tma7	0.732987	0.844441	0.918076	0.554464	0.532323	0.742228	0.492461	0.979206	0.986183	0.972726	0.997582	0.969108	0.997331	0.911916	0.80518	0.880154	0.66889	0.585267	0.447367	0.524346	0.364406	0.934103	0.982478	0.799234	0.998622	0.846424	0.964338	0.790868	0.860984	0.954973	0.965794	0.999932	0.991237	1	0.681303	0.614036	0.769368	0.909743	0.856678	0.999441	0.497824	0.685391	0.37568	0.794754	0.995606	0.787251	0.335741	0.772425	0.93674
Arel1	0.536694	0.607765	0.00572693	0.135191	0.128629	0.718552	0.711776	0.947805	0.937056	0.109195	0.997582	0.953233	0.997331	0.951726	0.884777	0.208542	1.15184e-06	0.0606628	0.00184928	0.545875	0.498325	0.962748	0.639366	3.50396e-05	0.998622	0.245362	0.965424	0.846277	0.522384	0.770712	0.509221	0.999932	0.987566	1	0.0132864	0.863787	0.18531	0.439299	0.968492	0.999441	0.0437743	0.528957	0.0413504	0.438552	0.995606	0.485478	0.392682	0.772425	0.565497
Prxl2c	0.440629	0.348883	0.334785	0.294069	0.301079	0.399651	0.524493	0.939485	0.872291	0.684609	0.997582	0.953233	0.997331	0.916218	0.33819	0.485842	0.656681	0.283868	0.110519	0.543971	0.135882	0.676499	0.819618	0.788958	0.998622	0.667115	0.965098	0.618177	0.344148	0.38152	0.375838	0.999932	0.877912	1	0.5975	0.319496	0.844154	0.86739	0.692409	0.999441	0.146306	0.954688	0.129255	0.588535	0.996237	0.63513	0.412544	0.772425	0.203854
Cldnd1	0.625786	0.833946	0.511081	0.871543	0.615149	0.710081	0.704594	0.953539	0.985535	0.788213	0.997582	0.976655	0.997331	0.950607	0.25489	0.951256	0.663556	0.574808	0.0335709	0.665348	0.944856	0.639215	0.999044	0.794913	0.998622	0.509801	0.976925	0.988057	0.984709	0.654579	0.884283	0.999932	0.95784	1	0.0116557	0.532137	0.491341	0.439299	0.816925	0.999441	0.521459	0.916832	0.716011	0.795049	0.995606	0.91433	0.858848	0.956884	0.273012
Nfic	0.878253	0.228654	0.461281	0.917994	0.94512	0.667724	0.123681	0.993268	0.811371	0.757358	0.997582	0.999856	0.997331	0.901424	0.654461	0.570904	0.0490037	0.15274	0.493177	0.637872	0.271569	0.857532	0.853574	0.147781	0.998622	0.85953	0.972637	0.749683	0.929981	0.34476	0.426509	0.999932	0.86485	1	0.451882	0.914992	0.743227	0.819072	0.97793	0.999441	0.865127	0.436471	0.0795879	0.955241	0.990195	0.569143	0.43126	0.774178	0.928637
Ciao2b	0.431265	0.396651	0.835629	0.817002	0.166315	0.328093	0.63237	0.932489	0.883019	0.948741	0.997582	0.953233	0.997331	0.935979	0.189136	0.741564	0.238645	0.646925	0.143095	0.513834	0.859194	0.589092	0.9236	0.423336	0.998622	0.695259	0.964094	0.968717	0.742481	0.219817	0.648589	0.999932	0.837775	1	0.990643	0.31677	0.537536	0.997048	0.690864	0.999441	0.114509	0.932099	0.831836	0.545815	0.995606	0.954269	0.834193	0.951879	0.170884
Tmem70	0.951471	0.457993	0.81898	0.831847	0.696684	0.537371	0.530496	0.995622	0.910369	0.940749	0.997582	0.977609	0.997331	0.917467	0.852576	0.387459	0.143554	0.857441	0.790095	0.521228	0.485093	0.951017	0.765865	0.306845	0.998622	0.958114	0.964338	0.8415	0.794116	0.336907	0.785771	0.999932	0.863455	1	0.913633	0.283482	0.717902	0.983067	0.674187	0.999441	0.734637	0.970115	0.562187	0.912523	0.997347	0.860741	0.944956	0.976531	0.968203
Prr13	0.963626	0.622706	0.53499	0.920108	0.700566	0.909442	0.251986	0.996844	0.939317	0.800672	0.997582	0.977609	0.997331	0.901424	0.971229	0.712451	0.00446142	0.177412	0.797137	0.536452	0.674688	0.990882	0.913362	0.0258006	0.998622	0.960612	0.965098	0.914228	0.811874	0.693702	0.536825	0.999932	0.968472	1	0.812947	0.565289	0.466096	0.966993	0.835529	0.999441	0.778419	0.737484	0.268413	0.931486	0.995606	0.742088	0.783798	0.942998	0.490648
Ints12	0.827056	0.0615148	0.26962	0.951448	0.991938	0.832548	0.533468	0.98937	0.532051	0.643093	0.997582	0.999856	0.997331	0.919021	0.613401	0.0289528	0.141538	0.682626	0.611258	0.981839	0.712849	0.832271	0.251859	0.303827	0.998622	0.904342	0.998721	0.926589	0.917793	0.113494	0.623255	0.999932	0.710129	1	0.189247	0.0245198	0.974954	0.698882	0.222813	0.999441	0.852305	0.244855	0.684878	0.950528	0.990195	0.907085	0.325778	0.772425	0.731124
Uqcr10	0.867346	0.913388	0.00753349	0.805601	0.428983	0.803835	0.952795	0.993268	0.991833	0.12946	0.997582	0.955323	0.997331	0.992892	0.429576	0.649877	0.00582693	0.799819	0.740677	0.474983	0.6804	0.73283	0.890373	0.0314246	0.998622	0.948375	0.957632	0.916185	0.701229	0.782706	0.833208	0.999932	0.987566	1	0.692885	0.34131	0.649908	0.91708	0.70778	0.999441	0.465972	0.940787	0.891098	0.790659	0.996237	0.969056	0.308632	0.772425	0.426879
Ufc1	0.389965	0.38624	0.287712	0.17786	0.15698	0.759541	0.75817	0.923029	0.879182	0.65675	0.997582	0.953233	0.997331	0.958676	0.940242	0.47779	5.64552e-05	0.409914	0.00596139	0.392269	0.273445	0.98135	0.816205	0.000837033	0.998622	0.342642	0.955487	0.750648	0.795172	0.454242	0.427883	0.999932	0.921703	1	0.0105863	0.289108	0.692282	0.439299	0.676833	0.999441	0.0844347	0.644024	0.331738	0.515197	0.995606	0.774493	0.760241	0.938899	0.710859
Nmral1	0.999696	0.0719377	0.588979	0.483226	0.654449	0.785914	0.726056	0.99979	0.572954	0.822889	0.997582	0.977609	0.997331	0.953068	0.644648	0.00248042	0.0738746	0.385496	0.406704	0.621186	0.661916	0.852755	0.0511342	0.196672	0.998622	0.833136	0.972637	0.908243	0.727312	0.30418	0.798877	0.999932	0.858964	1	0.185774	0.0046962	0.643872	0.694249	0.0818655	0.999441	0.656328	0.127603	0.421614	0.866606	0.990195	0.804483	0.774879	0.942998	0.736654
Mrap	0.0827264	0.04782	0.300272	0.628544	0.780317	0.121977	0.267895	0.922239	0.487008	0.664793	0.997582	0.983105	0.997331	0.901424	0.136034	0.15877	0.079825	0.52717	0.819942	0.367967	0.0541552	0.546739	0.577278	0.207641	0.998622	0.966415	0.955487	0.469713	0.310508	0.0184682	0.692691	0.999932	0.329106	1	0.451438	0.158031	0.108731	0.819064	0.541347	0.999441	0.159633	0.821211	0.271434	0.59932	0.995606	0.742088	0.346201	0.772425	0.713028
Tm2d3	0.410255	0.260848	0.282618	0.527671	0.343058	0.36855	0.323138	0.925294	0.831813	0.654177	0.997582	0.953233	0.997331	0.901424	0.434998	0.100918	0.784612	0.032903	0.679673	0.91798	0.298804	0.737247	0.473974	0.878625	0.998622	0.925798	0.996665	0.761798	0.380683	0.287693	0.409016	0.999932	0.858964	1	0.490862	0.137019	0.233441	0.831915	0.51881	0.999441	0.639833	0.339366	0.0797708	0.857707	0.990195	0.569143	0.86452	0.956884	0.309657
Fitm1	0.452408	0.527107	0.437861	0.675017	0.322724	0.873962	0.0413542	0.943461	0.924579	0.740269	0.997582	0.953233	0.997331	0.901424	0.384145	0.276184	0.466709	0.995371	0.304007	0.879265	0.00880076	0.701645	0.703909	0.635438	0.999946	0.797449	0.994911	0.27822	0.886233	0.782683	0.31358	0.999932	0.987566	1	0.870959	0.407559	0.082044	0.977774	0.745574	0.999441	0.170082	0.571305	0.0547656	0.612209	0.995606	0.527772	0.336721	0.772425	0.297703
Slc44a2	0.231946	0.928855	0.176529	0.037664	0.047144	0.181076	0.116877	0.922239	0.992776	0.567192	0.997582	0.953233	0.997331	0.901424	0.0419186	0.581097	0.372754	0.527332	0.511983	0.127822	0.0216924	0.43111	0.858946	0.551348	0.998622	0.865992	0.938695	0.35425	0.40168	0.162789	0.395394	0.999932	0.783353	1	0.245089	0.146542	0.2252	0.739317	0.532655	0.999441	0.0999299	0.455966	0.0612888	0.526208	0.990195	0.537481	0.907544	0.962585	0.365438
Nat9	0.631405	0.104963	0.335348	0.283347	0.0936657	0.668414	0.5647	0.95575	0.655798	0.684978	0.997582	0.953233	0.997331	0.925886	0.664187	0.066937	0.510585	0.801564	0.176796	0.519922	0.126224	0.863176	0.384367	0.675605	0.998622	0.721615	0.964338	0.602456	0.390762	0.180892	0.683476	0.999932	0.806478	1	0.486131	0.147671	0.300488	0.831878	0.532841	0.999441	0.113916	0.45337	0.246676	0.544927	0.990195	0.731238	0.86391	0.956884	0.642439
Med11	0.747606	0.470791	0.626909	0.777254	0.417156	0.811346	0.495931	0.980265	0.9143	0.842365	0.997582	0.955323	0.997331	0.913567	0.407414	0.839762	0.0302253	0.760639	0.659714	0.854204	0.826159	0.716732	0.965418	0.106116	0.998622	0.918445	0.990199	0.958161	0.785809	0.501201	0.532408	0.999932	0.930887	1	0.74103	0.876976	0.960313	0.939038	0.971815	0.999441	0.406281	0.705969	0.742487	0.752828	0.995606	0.922008	0.334963	0.772425	0.726186
Snap47	0.578692	0.532148	0.842395	0.447691	0.458028	0.411248	0.112391	0.948409	0.927701	0.950159	0.997582	0.961316	0.997331	0.901424	0.762264	0.770983	0.45792	0.336751	0.0961942	0.865142	0.118165	0.916394	0.933747	0.628478	0.998622	0.6468	0.992353	0.589041	0.936547	0.258521	0.553159	0.999932	0.858964	1	0.0921779	0.911058	0.701917	0.622467	0.977026	0.999441	0.426316	0.889226	0.138579	0.765653	0.995606	0.637743	0.218675	0.772425	0.296719
Ogfod3	0.393794	0.452808	0.480107	0.92122	0.111871	0.196574	0.803084	0.923029	0.908678	0.770386	0.997582	0.953233	0.997331	0.967048	0.270983	0.541251	0.000493988	0.474607	0.194377	0.368147	0.657026	0.646466	0.844021	0.00463885	0.998622	0.735528	0.955487	0.908243	0.552736	0.132508	0.75909	0.999932	0.737962	1	0.868756	0.376316	0.400879	0.977471	0.727418	0.999441	0.13243	0.653676	0.936625	0.571854	0.995606	0.985143	0.218392	0.772425	0.770661
1110032A03Rik	0.887637	0.881612	0.583752	0.927548	0.321327	0.265181	0.379863	0.993268	0.991669	0.820396	0.997582	0.953233	0.997331	0.901424	0.917093	0.712921	0.911755	0.0296983	0.201001	0.3453	0.18847	0.973977	0.913503	0.95493	0.998622	0.743348	0.955487	0.675106	0.55349	0.529239	0.506828	0.999932	0.93252	1	0.471222	0.779034	0.0103565	0.825583	0.943396	0.999441	0.443088	0.364787	0.568311	0.776475	0.990195	0.862936	0.402872	0.772425	0.543211
Rbfa	0.692889	0.0488702	0.559612	0.77236	0.819891	0.342203	0.918731	0.972514	0.490713	0.809991	0.997582	0.989556	0.997331	0.987385	0.0615255	0.00545376	0.701882	0.965021	0.148592	0.853443	0.610397	0.463785	0.0893124	0.822347	0.998895	0.700766	0.990118	0.894118	0.584574	0.399234	0.877919	0.999932	0.888863	1	0.0155886	0.0656119	0.646328	0.451514	0.368757	0.999441	0.990767	0.0643336	0.790699	0.995862	0.893282	0.93593	0.959496	0.982534	0.153892
Tmed2	0.510826	0.0547484	0.51989	0.316087	0.716471	0.479868	0.795358	0.947805	0.510109	0.791972	0.997582	0.977609	0.997331	0.964568	0.974599	0.161115	0.111348	0.698695	0.741666	0.104261	0.661038	0.991797	0.579373	0.259688	0.998622	0.948513	0.904506	0.908243	0.309894	0.239488	0.258408	0.999932	0.857137	1	0.282483	0.948359	0.741411	0.744347	0.985394	0.999441	0.939307	0.14338	0.678872	0.971851	0.990195	0.907085	0.646305	0.912379	0.382257
Gask1b	0.227309	0.240681	0.379695	0.504247	0.734383	0.870071	0.421871	0.922239	0.821498	0.704278	0.997582	0.979323	0.997331	0.901424	0.0384264	0.0603047	0.179684	0.559858	0.444747	0.00368955	0.737733	0.409298	0.364472	0.353279	0.998622	0.846108	0.284277	0.930638	0.44958	0.410081	0.268166	0.999932	0.893697	1	0.0401068	0.00102243	0.472549	0.53758	0.0305284	0.999441	0.35702	0.398753	0.89986	0.728356	0.990195	0.972672	0.725948	0.922655	0.419741
Dus1l	0.305183	0.213285	0.975357	0.580396	0.0979613	0.858808	0.518108	0.922239	0.804497	0.989676	0.997582	0.953233	0.997331	0.916112	0.417509	0.245532	0.301915	0.897996	0.0525176	0.602997	0.895586	0.723528	0.681631	0.49024	0.998622	0.590017	0.968564	0.977886	0.700963	0.55155	0.476592	0.999932	0.933345	1	0.464579	0.810938	0.935627	0.823619	0.956391	0.999441	0.0155474	0.220932	0.906312	0.399135	0.990195	0.975471	0.272756	0.772425	0.588301
Ppp1r27	0.420291	0.751559	0.443604	0.0204109	0.36125	0.624622	0.0130554	0.930025	0.973122	0.744754	0.997582	0.953233	0.997331	0.901424	0.552402	0.252541	0.853313	0.080718	0.215914	0.0688028	0.000920925	0.800694	0.684287	0.920595	0.998622	0.75034	0.876736	0.228914	0.995307	0.974544	0.995104	0.999932	0.995483	1	0.710591	0.0963247	0.345072	0.926061	0.44366	0.999441	0.120484	0.424317	0.000236294	0.556026	0.990195	0.203692	0.427511	0.773307	0.298803
Rps4l	0.99349	0.588931	0.934869	0.0694393	0.897904	0.0934428	0.32844	0.998928	0.934256	0.975444	0.997582	0.998173	0.997331	0.901424	0.59728	0.477205	0.375154	0.0745872	0.627427	0.050822	0.169444	0.822871	0.815796	0.552692	0.998622	0.907077	0.813844	0.651783	0.892909	0.122839	0.49106	0.999932	0.7257	1	0.312594	0.0375939	0.684249	0.744572	0.276178	0.999441	0.902376	0.386096	0.0742572	0.960587	0.990195	0.56025	0.0539996	0.741388	0.370773
Dnaaf2	0.371288	0.682722	0.84526	0.254729	0.958918	0.145998	0.678355	0.922239	0.951882	0.950159	0.997582	0.999856	0.997331	0.942277	0.805419	0.149834	0.566587	0.120144	0.504249	0.0181248	0.97521	0.934103	0.564343	0.71884	0.998622	0.863505	0.631011	0.995172	0.537685	0.200575	0.561168	0.999932	0.816687	1	0.730726	0.00984792	0.213072	0.93298	0.129792	0.999441	0.524052	0.447029	0.297933	0.795049	0.990195	0.756326	0.68316	0.912379	0.346593
C1qtnf12	0.142538	0.0819155	0.0695473	0.901644	0.824835	0.995605	0.466319	0.922239	0.599492	0.390762	0.997582	0.989556	0.999056	0.908066	0.88772	0.167572	0.510005	0.527671	0.298085	0.877135	0.317515	0.962889	0.584048	0.675027	0.998622	0.79552	0.994911	0.772143	0.272174	0.106805	0.449166	0.999932	0.698246	1	0.474008	0.448603	0.301177	0.826149	0.773977	0.999441	0.310362	0.339337	0.713097	0.708837	0.990195	0.913119	0.213785	0.772425	0.628906
P3h4	0.293761	0.243978	0.150185	0.700692	0.745534	0.422104	0.686802	0.922239	0.823569	0.536347	0.997582	0.979323	0.997331	0.945722	0.614113	0.311059	0.00205606	0.278562	0.330755	0.208033	0.929402	0.832756	0.725117	0.01431	0.998622	0.809244	0.955487	0.981627	0.54218	0.741414	0.997116	0.999932	0.983285	1	0.718767	0.821829	0.334639	0.928603	0.958053	0.999441	0.395877	0.197861	0.606074	0.744975	0.990195	0.878391	0.110169	0.741388	0.788017
Rreb1	0.586236	0.728034	0.0712504	0.386977	0.274502	0.227593	0.508569	0.948409	0.967523	0.394902	0.997582	0.953233	0.997331	0.913951	0.24168	0.127879	0.622453	0.832827	0.408525	0.560232	0.0453206	0.628541	0.525428	0.761559	0.998622	0.833136	0.965957	0.446555	0.747659	0.57253	0.87116	0.999932	0.933345	1	0.864499	0.462325	0.109389	0.977124	0.782845	0.999441	0.175416	0.211942	0.216579	0.618697	0.990195	0.698105	0.0768349	0.741388	0.698479
Gucd1	0.135053	0.89367	0.375539	0.146439	0.581328	0.66972	0.925068	0.922239	0.991762	0.702361	0.997582	0.972725	0.997331	0.988133	0.334291	0.220203	0.304361	0.372783	0.943825	0.101635	0.0234801	0.67617	0.65545	0.492595	0.998622	0.995166	0.904506	0.365989	0.0745388	0.766334	0.205896	0.999932	0.987523	1	0.334149	0.012449	0.00557539	0.753353	0.14977	0.999441	0.59495	0.747776	0.383757	0.830602	0.995606	0.792011	0.679368	0.912379	0.988868
1110038F14Rik	0.0408434	0.402129	0.408672	0.118234	0.310413	0.561256	0.0525758	0.912565	0.88657	0.719925	0.997582	0.953233	0.997331	0.901424	0.851014	0.164371	0.412367	0.0963894	0.472997	0.973711	0.122437	0.95028	0.582151	0.585411	0.998622	0.853443	0.998638	0.596942	0.0424694	0.802757	0.836333	0.999932	0.987566	1	0.717089	0.374679	0.847362	0.928406	0.726323	0.999441	0.462549	0.297981	0.022093	0.789133	0.990195	0.427996	0.223337	0.772425	0.327575
Tmem214	0.207747	0.333475	0.430854	0.389936	0.0447088	0.639843	0.118349	0.922239	0.867029	0.735007	0.997582	0.953233	0.997331	0.901424	0.180287	0.436445	0.153625	0.357156	0.03832	0.311628	0.123782	0.584096	0.794366	0.319769	0.998622	0.541666	0.955487	0.598692	0.653003	0.26325	0.658897	0.999932	0.858964	1	0.602016	0.282591	0.769687	0.868441	0.673841	0.999441	0.0369173	0.695426	0.101792	0.432389	0.995606	0.596076	0.715695	0.919073	0.177739
Lmbr1	0.39851	0.10012	0.814685	0.741776	0.451451	0.910523	0.896517	0.923029	0.647714	0.938393	0.997582	0.961316	0.997331	0.985006	0.0203952	0.729659	0.282507	0.566659	0.514989	0.124111	0.758979	0.33501	0.919657	0.472184	0.998622	0.866612	0.928418	0.940333	0.857229	0.227423	0.726363	0.999932	0.847899	1	0.017595	0.346189	0.486307	0.456692	0.710993	0.999441	0.330084	0.248355	0.89785	0.718597	0.990195	0.971425	0.65061	0.912379	0.713132
Pithd1	0.140736	0.824411	0.783195	0.971253	0.93524	0.432397	0.744167	0.922239	0.985535	0.926158	0.997582	0.999856	0.997331	0.957176	0.844095	0.531376	0.145188	0.712489	0.162192	0.322863	0.878192	0.947804	0.840642	0.309051	0.998622	0.712736	0.955487	0.972894	0.313333	0.490271	0.838416	0.999932	0.929463	1	0.326672	0.291721	0.926453	0.751548	0.678804	0.999441	0.289926	0.673139	0.801649	0.691408	0.995606	0.941772	0.636831	0.912379	0.504283
Lage3	0.527942	0.322824	0.867747	0.896125	0.423947	0.557266	0.470193	0.947805	0.864227	0.956721	0.997582	0.955323	0.997331	0.908066	0.403541	0.0387176	0.414388	0.776518	0.661981	0.0986847	0.582468	0.713978	0.294455	0.586898	0.998622	0.919358	0.899663	0.883953	0.868237	0.185815	0.630761	0.999932	0.808609	1	0.853784	0.00355852	0.871507	0.977124	0.0686568	0.999441	0.385449	0.85911	0.602554	0.737644	0.995606	0.877165	0.71303	0.919073	0.81466
Ankrd46	0.216499	0.820982	0.0564749	0.450417	0.187795	0.711458	0.946834	0.922239	0.985535	0.356046	0.997582	0.953233	0.997331	0.992642	0.0571572	0.510442	0.29224	0.510352	0.825357	0.399458	0.958905	0.455835	0.832451	0.481686	0.998622	0.968047	0.955487	0.991845	0.983358	0.678134	0.498202	0.999932	0.962863	1	0.252761	0.29443	0.624432	0.743796	0.681365	0.999441	0.127377	0.87234	0.696214	0.565609	0.995606	0.90818	0.870125	0.956884	0.680012
Cd302	0.913806	0.0287097	0.909949	0.15478	0.112765	0.757588	0.37787	0.993361	0.375865	0.970998	0.997582	0.953233	0.997331	0.901424	0.360237	0.205721	0.646473	0.229629	0.650447	0.310573	0.342943	0.686828	0.635276	0.780985	0.998622	0.913795	0.955487	0.778888	0.235352	0.204579	0.677898	0.999932	0.820637	1	0.86135	0.846362	0.84094	0.977124	0.965511	0.999441	0.205759	0.086329	0.0986592	0.643927	0.938138	0.592075	0.349299	0.772425	0.556131
Mypn	0.816348	0.285538	0.650457	0.173812	0.545132	0.955839	0.0128618	0.988014	0.8491	0.856096	0.997582	0.970282	0.997331	0.901424	0.603635	0.435841	0.287757	0.261752	0.990503	0.80457	0.00192725	0.826055	0.794366	0.477395	0.998622	0.99885	0.985168	0.239344	0.592242	0.498641	0.504196	0.999932	0.930711	1	0.732076	0.683671	0.182855	0.933955	0.897927	0.999441	0.69552	0.409177	0.00320049	0.892975	0.990195	0.372674	0.193304	0.764055	0.285142
Ldah	0.0912226	0.2073	0.17244	0.57065	0.43724	0.886019	0.20416	0.922239	0.798289	0.565637	0.997582	0.955323	0.997331	0.901424	0.123013	0.00471366	0.0514978	0.279874	0.635555	0.206469	0.0355917	0.536824	0.0808548	0.152642	0.998622	0.91001	0.955487	0.411648	0.161578	0.37957	0.288669	0.999932	0.877452	1	0.213844	0.00261229	0.020761	0.718112	0.0566861	0.999441	0.349625	0.287206	0.452122	0.728074	0.990195	0.808759	0.240208	0.772425	0.560584
Sdhaf4	0.117378	0.0405529	0.0537914	0.850236	0.150828	0.603411	0.0951432	0.922239	0.450072	0.349038	0.997582	0.953233	0.997331	0.901424	0.073291	0.0162905	0.173192	0.996253	0.294801	0.918886	0.0764579	0.478774	0.180579	0.344842	0.999946	0.794823	0.996665	0.521196	0.938867	0.255327	0.300679	0.999932	0.858964	1	0.67757	0.0900144	0.232125	0.908454	0.431206	0.999441	0.0478039	0.112147	0.202483	0.449568	0.990195	0.690002	0.220642	0.772425	0.516802
1110059E24Rik	0.677938	0.79537	0.083954	0.259648	0.69677	0.101267	0.0593674	0.970113	0.979841	0.420139	0.997582	0.977609	0.997331	0.901424	0.976653	0.264456	0.458918	0.229512	0.989764	0.333666	0.0501506	0.992705	0.693957	0.629572	0.998622	0.99885	0.955487	0.45625	0.550588	0.305219	0.595761	0.999932	0.858964	1	0.964176	0.890831	0.57392	0.989559	0.973202	0.999441	0.997737	0.209617	0.0587141	0.999332	0.990195	0.535541	0.0374875	0.723455	0.289957
Rab3gap2	0.0306671	0.0213394	0.0901523	0.838457	0.0292589	0.587823	0.824222	0.862875	0.323533	0.432354	0.997582	0.953233	0.997331	0.97381	0.00255373	0.00450111	6.09521e-05	0.834246	0.0610631	0.455178	0.697902	0.203433	0.0782079	0.000891057	0.998622	0.605187	0.9557	0.92201	0.982302	0.242284	0.988184	0.999932	0.857137	1	0.37182	0.160593	0.825996	0.760761	0.544544	0.999441	0.00293794	0.0525638	0.755834	0.305832	0.828674	0.925374	0.975558	0.989421	0.592365
1110059G10Rik	0.303911	0.247774	0.894905	0.646238	0.102629	0.0894729	0.872237	0.922239	0.823737	0.965728	0.997582	0.953233	0.997331	0.982576	0.721177	0.644406	0.562112	0.799449	0.670504	0.0183869	0.964367	0.895163	0.887878	0.716038	0.998622	0.923343	0.63543	0.993213	0.0618982	0.673872	0.652415	0.999932	0.962547	1	0.948708	0.15248	0.867843	0.987488	0.538403	0.999441	0.599507	0.0710085	0.852858	0.833525	0.899185	0.962	0.30922	0.772425	0.142529
Vta1	0.758505	0.718409	0.344188	0.206187	0.52112	0.47274	0.137614	0.982492	0.965002	0.689017	0.997582	0.968789	0.997331	0.901424	0.907247	0.70789	0.00480096	0.00670177	0.658196	0.943744	0.537274	0.969931	0.912301	0.0272518	0.998622	0.917959	0.996665	0.863663	0.517331	0.490549	0.92115	0.999932	0.929463	1	0.580846	0.581974	0.0652973	0.858723	0.840246	0.999441	0.765327	0.733496	0.0546678	0.925646	0.995606	0.52762	0.357955	0.772425	0.248436
Rnf208	0.588224	1.56e-10	0.0759469	0.578886	0.485635	0.13001	0.524439	0.948409	5.87e-08	0.403119	0.997582	0.965358	0.997331	0.916218	0.269553	1.46728e-10	0.0512286	0.69358	0.696038	0.0965389	0.780885	0.646276	4.92587e-08	0.152196	0.998622	0.932699	0.899663	0.9447	0.718805	0.000494033	0.547267	0.999932	0.0341391	1	0.836167	0.00061074	0.708753	0.972279	0.0214925	0.999441	4.03987e-15	4.85199e-25	0.0109902	1.26529e-11	4.55893e-21	0.38887	0.407084	0.772425	0.0355898
Mtmr14	0.564381	0.12856	0.331498	0.309026	0.0833032	0.817942	0.0320446	0.947805	0.703287	0.683445	0.997582	0.953233	0.997331	0.901424	0.0897068	0.438421	1.42564e-05	0.0350739	0.0775285	0.170364	0.0203117	0.505907	0.795897	0.000278176	0.998622	0.628886	0.955487	0.344401	0.468686	0.288752	0.450408	0.999932	0.858964	1	0.00444115	0.880645	0.480818	0.379355	0.971815	0.999441	0.135608	0.223968	0.0369343	0.576028	0.990195	0.4728	0.539352	0.850938	0.361943
Bsdc1	0.132387	0.414769	0.777639	0.00386217	0.13691	0.493786	0.0399207	0.922239	0.891229	0.923663	0.997582	0.953233	0.997331	0.901424	0.157846	0.599868	0.000807946	0.0746972	0.20418	0.86895	0.0156868	0.571328	0.866435	0.00685442	0.998622	0.743375	0.993829	0.329142	0.908161	0.229483	0.275658	0.999932	0.850587	1	0.829288	0.819705	0.732645	0.970291	0.958053	0.999441	0.0891586	0.96863	0.0073739	0.520009	0.997245	0.386631	0.954538	0.979858	0.260322
Tmcc2	0.288664	0.609929	0.840042	0.390019	0.565428	0.979529	0.0908259	0.922239	0.937056	0.949885	0.997582	0.972625	0.997819	0.901424	0.785745	0.987366	0.727061	0.32131	0.475409	0.704415	0.148055	0.926151	0.999044	0.840946	0.998622	0.854503	0.981634	0.632311	0.256276	0.746075	0.595371	0.999932	0.984519	1	0.551047	0.856958	0.826911	0.846464	0.96727	0.999441	0.768834	0.733786	0.0747259	0.926862	0.995606	0.56066	0.349635	0.772425	0.600591
Ahsa2	0.814455	0.976033	0.810564	0.55307	0.608301	0.748768	0.18324	0.987845	0.996061	0.936473	0.997582	0.976381	0.997331	0.901424	0.627024	0.829122	0.00145679	0.0445775	0.579433	0.599921	0.270908	0.840351	0.959837	0.0109114	0.998622	0.895082	0.968564	0.749421	0.879806	0.884408	0.688881	0.999932	0.987566	1	0.901158	0.730568	0.449631	0.980711	0.920939	0.999441	0.430767	0.676001	0.0554798	0.769421	0.995606	0.52941	0.231718	0.772425	0.6632
Lgalsl	0.823512	0.113817	0.784497	0.298403	0.366949	0.315643	0.891209	0.98937	0.675095	0.926882	0.997582	0.953233	0.997331	0.984739	0.798108	0.0429562	0.707876	0.235345	0.608673	0.649148	0.983532	0.930219	0.30683	0.826485	0.998622	0.903605	0.974887	0.99649	0.492822	0.618687	0.532388	0.999932	0.947074	1	0.963629	0.247003	0.427038	0.989536	0.648141	0.999441	0.648673	0.0664949	0.412424	0.863182	0.896057	0.802001	0.38669	0.772425	0.586689
Lrrn4cl	0.562905	0.434827	0.0448838	0.673041	0.987366	0.676327	0.665902	0.947805	0.901452	0.322256	0.997582	0.999856	0.997331	0.941358	0.218915	0.398162	0.0982276	0.960665	0.607715	0.476117	0.325686	0.612971	0.769949	0.239331	0.998895	0.903594	0.957632	0.774437	0.681149	0.802033	0.991989	0.999932	0.987566	1	0.194771	0.987303	0.48668	0.702779	0.99663	0.999441	0.689434	0.346312	0.496191	0.889213	0.990195	0.827792	0.179206	0.764055	0.620793
Ak8	0.954339	0.955296	0.539019	0.111816	0.691036	0.665171	0.0315115	0.995979	0.993257	0.802183	0.997582	0.977609	0.997331	0.901424	0.921456	0.716348	0.0385961	0.0408156	0.647435	0.847627	0.0397399	0.976056	0.91446	0.125407	0.998622	0.913757	0.989284	0.424761	0.785411	0.78519	0.767385	0.999932	0.987566	1	0.906718	0.930657	0.906774	0.982024	0.980826	0.999441	0.785078	0.748908	0.00688872	0.933024	0.995606	0.386631	0.358324	0.772425	0.539816
Prrc1	0.150665	0.795133	0.295802	0.65242	0.47491	0.150318	0.615105	0.922239	0.979841	0.661404	0.997582	0.965358	0.997331	0.932778	0.974028	0.369454	0.768488	0.389226	0.499272	0.566237	0.915344	0.991648	0.75678	0.867804	0.998622	0.861541	0.968564	0.979139	0.140714	0.268709	0.97467	0.999932	0.858964	1	0.60171	0.84607	0.549736	0.868441	0.965469	0.999441	0.633408	0.354409	0.508212	0.854855	0.990195	0.834666	0.152482	0.764055	0.965523
Rgcc	0.000642917	0.335743	0.00629646	0.979365	0.377777	0.0414814	0.36979	0.244163	0.867476	0.116509	0.997582	0.953233	0.997331	0.901424	0.00658549	0.171084	0.990722	0.998194	0.135695	0.0251239	0.419765	0.260663	0.587504	0.995457	0.999946	0.695259	0.695584	0.808889	0.0156462	0.0148386	0.448514	0.999932	0.301423	1	0.222024	0.0203067	0.55146	0.726828	0.198338	0.999441	0.0129972	0.460143	0.595378	0.376942	0.990195	0.876091	0.0146195	0.526095	0.386723
Klhdc9	0.518721	0.00961695	0.508346	0.288406	0.445953	0.385628	0.354511	0.947805	0.201107	0.785671	0.997582	0.958138	0.997331	0.901424	0.457742	0.69604	0.00217123	0.737307	0.825175	0.0024225	0.235822	0.751314	0.909224	0.0148864	0.998622	0.968047	0.227715	0.709808	0.939894	0.151513	0.867088	0.999932	0.7591	1	0.756409	0.0317581	0.64312	0.947768	0.254601	0.999441	0.409434	0.0269372	0.18412	0.754673	0.619946	0.672885	NA	NA	0.996343
Imp3	0.497508	0.686285	0.0758203	0.378812	0.248071	0.136028	0.519714	0.947805	0.954444	0.403119	0.997582	0.953233	0.997331	0.916141	0.129276	0.137243	0.443292	0.144656	0.602539	0.011286	0.812665	0.539718	0.544397	0.615411	0.998622	0.901719	0.518379	0.953549	0.725085	0.167382	0.79292	0.999932	0.788631	1	0.314794	0.00096221	0.181095	0.744868	0.0293536	0.999441	0.252911	0.4413	0.341003	0.679092	0.990195	0.779437	0.920623	0.967986	0.397445
Dipk2a	0.60746	0.340044	0.00679507	0.26243	0.60655	0.469744	0.901512	0.949732	0.868591	0.121332	0.997582	0.976381	0.997331	0.985834	0.322015	0.242793	0.299093	0.38747	0.310161	0.254742	0.395429	0.6724	0.680256	0.488019	0.998622	0.801054	0.955487	0.798059	0.547958	0.289336	0.514724	0.999932	0.858964	1	0.324843	0.231294	0.398337	0.750784	0.633413	0.999441	0.963603	0.880489	0.317507	0.983724	0.995606	0.766125	0.376296	0.772425	0.0232228
Urah	0.276801	0.000691909	0.916521	0.257868	0.104208	0.736073	0.0923761	0.922239	0.0275591	0.972726	0.997582	0.953233	0.997331	0.901424	0.389256	0.000435046	0.913701	0.342786	0.182782	0.879493	0.102074	0.705282	0.0138156	0.956009	0.998622	0.724266	0.994911	0.569916	0.04095	0.00727233	0.0459489	0.999932	0.209323	1	0.0453109	0.0039122	0.0372272	0.548841	0.0735181	0.999441	0.56946	0.0507852	0.661835	0.813629	0.816	0.906588	0.317306	0.772425	0.0464197
Gkn3	0.115898	0.883619	0.731815	0.461439	0.455717	0.863875	0.283006	0.922239	0.991669	0.902645	0.997582	0.961316	0.997331	0.901424	0.0759341	0.0430342	0.76979	0.78701	0.514131	0.0603432	0.0923002	0.481958	0.307154	0.868156	0.998622	0.865992	0.844115	0.557239	0.54185	0.864379	0.859524	0.999932	0.987566	1	0.447722	0.00936442	0.336047	0.816099	0.126057	0.999441	0.0962349	0.956361	0.179331	0.526208	0.996237	0.669979	0.794666	0.942998	0.550714
Trmt1l	0.317787	0.753884	0.0843936	0.133887	0.458475	0.554574	0.0404742	0.922239	0.973122	0.421519	0.997582	0.961316	0.997331	0.901424	0.778221	0.0361216	0.0125542	0.0618974	0.0163966	0.645538	0.00602797	0.924073	0.284136	0.0561147	0.998622	0.430262	0.973758	0.253576	0.832994	0.83153	0.757449	0.999932	0.987566	1	0.00786498	0.0294352	0.488632	0.430793	0.244972	0.999441	0.203313	0.509737	0.0145971	0.64062	0.993877	0.391607	0.0705369	0.741388	0.539224
1190005I06Rik	0.224626	0.0756276	0.0369744	0.376972	0.208042	0.182429	0.977546	0.922239	0.584258	0.293306	0.997582	0.953233	0.997331	0.99669	0.466297	0.00513056	7.34642e-06	0.800497	0.139403	0.520787	0.325444	0.757162	0.0855345	0.000163641	0.998622	0.695259	0.964338	0.774437	0.943457	0.60972	0.365436	0.999932	0.94479	1	0.32103	0.0619641	0.284612	0.7483	0.358507	0.999441	0.158219	0.104595	0.627194	0.598445	0.990195	0.88765	0.301353	0.772425	0.876233
Llph	0.957933	0.33404	0.498304	0.7926	0.780202	0.808218	0.423743	0.996603	0.867373	0.77924	0.997582	0.983105	0.997331	0.901424	0.271862	0.721202	0.146046	0.799661	0.173392	0.776038	0.46473	0.647291	0.915925	0.309965	0.998622	0.719529	0.983221	0.830348	0.892251	0.285169	0.664691	0.999932	0.858964	1	0.0438597	0.874147	0.762648	0.5467	0.970619	0.999441	0.873115	0.680794	0.52313	0.957172	0.995606	0.842171	0.953488	0.979676	0.320004
Smim1	0.0537766	0.0904684	0.00041088	0.701689	0.564126	0.138819	0.582839	0.922239	0.626732	0.0215769	0.997582	0.972625	0.997331	0.928578	0.0869675	0.0145198	0.15158	0.916131	0.463882	0.0388101	0.955	0.501193	0.167262	0.317339	0.998622	0.848501	0.793735	0.990914	0.190538	0.00409732	0.368798	0.999932	0.147893	1	0.364779	8.32875e-05	0.850654	0.759531	0.00484138	0.999441	0.171994	0.93963	0.924226	0.614938	0.996237	0.980622	0.0122425	0.495002	0.118422
Smim11	0.264686	0.951931	0.80673	0.287916	0.561023	0.719521	0.762195	0.922239	0.993142	0.9352	0.997582	0.971438	0.997331	0.959703	0.78547	0.451547	0.113516	0.848978	0.0712108	0.460451	0.314723	0.926151	0.805722	0.26334	0.998622	0.627513	0.957632	0.771382	0.680767	0.805543	0.570123	0.999932	0.987566	1	0.155845	0.424132	0.662398	0.666466	0.755192	0.999441	0.238871	0.810877	0.337724	0.676585	0.995606	0.778544	0.750237	0.933549	0.719294
Ubiad1	0.735291	0.831222	0.407754	0.756014	0.589819	0.674741	0.257036	0.979216	0.985535	0.719598	0.997582	0.975595	0.997331	0.901424	0.697763	0.708288	0.0586028	0.164188	0.975519	0.565627	0.665531	0.882733	0.912301	0.167461	0.998622	0.998095	0.968564	0.909312	0.524094	0.669898	0.578383	0.999932	0.960848	1	0.620897	0.418957	0.306893	0.879016	0.751012	0.999441	0.874929	0.863234	0.321203	0.957349	0.995606	0.767359	0.817019	0.945713	0.382959
Dram1	0.0752921	0.0120693	0.7947	0.397467	0.217332	0.300821	0.269573	0.922239	0.231533	0.931873	0.997582	0.953233	0.997331	0.901424	0.00129195	6.74266e-05	4.45364e-07	0.389547	0.851732	0.0221757	0.163673	0.17738	0.00304716	1.58223e-05	0.998622	0.975984	0.664238	0.646439	0.727965	0.0161843	0.982182	0.999932	0.311043	1	0.00573281	3.70093e-05	0.564803	0.410348	0.00261458	0.999441	0.0592246	0.302763	0.157003	0.469305	0.990195	0.645796	0.56573	0.868209	0.509058
Jkamp	0.136429	0.404636	0.184251	0.0869358	0.506406	0.631462	0.666092	0.922239	0.88657	0.574192	0.997582	0.966195	0.997331	0.941358	0.0303833	0.0884459	0.745599	0.0898841	0.128096	0.731221	0.577658	0.375746	0.446744	0.85367	0.998622	0.692732	0.981634	0.881965	0.129163	0.733863	0.304337	0.999932	0.982237	1	0.0100678	0.0717914	0.267462	0.439299	0.38857	0.999441	0.565162	0.389039	0.168156	0.810497	0.990195	0.659062	0.469032	0.797573	0.362358
Zfp869	0.957052	0.370544	0.441731	0.39311	0.787647	0.22802	0.290889	0.996603	0.874038	0.743861	0.997582	0.984166	0.997331	0.901424	0.94465	0.242658	0.283085	0.146889	0.852656	0.117406	0.301283	0.982144	0.68008	0.472829	0.998622	0.976087	0.921557	0.762588	0.860524	0.877047	0.919852	0.999932	0.987566	1	0.945911	0.761693	0.693595	0.987068	0.936296	0.999441	0.890179	0.104033	0.144875	0.958009	0.990195	0.638946	0.147478	0.760681	0.631289
Mfsd1	0.577122	0.979245	0.176454	0.63528	0.414839	0.456152	0.0589503	0.948409	0.996541	0.567192	0.997582	0.955323	0.997331	0.901424	0.0504729	0.96174	0.000157348	0.0306212	0.975116	0.522456	0.304178	0.443576	0.999044	0.00188657	0.998622	0.998095	0.964338	0.764308	0.894209	0.654427	0.41102	0.999932	0.95784	1	0.138028	0.821159	0.365565	0.657331	0.958053	0.999441	0.21724	0.48576	0.0362734	0.656224	0.992988	0.472169	0.654773	0.912379	0.107754
Slc46a3	0.495281	0.892512	0.13041	0.582221	0.24395	0.263266	0.85754	0.947805	0.991762	0.502892	0.997582	0.953233	0.997331	0.980869	0.0187964	0.51022	0.286602	0.600557	0.912247	0.48472	0.94388	0.330851	0.832451	0.476319	0.998622	0.9891	0.959141	0.987769	0.763596	0.442583	0.604348	0.999932	0.911783	1	0.0462714	0.955626	0.635805	0.551034	0.986894	0.999441	0.18241	0.423382	0.78389	0.624295	0.990195	0.931861	0.0931391	0.741388	0.408752
Pnpla8	0.719143	0.404354	0.70483	0.531381	0.730105	0.688111	0.761724	0.978202	0.88657	0.886492	0.997582	0.978088	0.997331	0.959614	0.241596	0.34403	0.037754	0.569873	0.230626	0.647256	0.70396	0.628541	0.743119	0.123654	0.998622	0.756037	0.974689	0.923332	0.668799	0.401303	0.813286	0.999932	0.890332	1	0.118846	0.306052	0.826163	0.645476	0.685171	0.999441	0.964901	0.761851	0.492281	0.984246	0.995606	0.826804	0.972053	0.988241	0.57968
Ergic1	0.997674	0.359259	0.243422	0.936401	0.461545	0.0995764	0.523098	0.999306	0.873319	0.61926	0.997582	0.961316	0.997331	0.916218	0.308109	0.756608	0.979848	0.415317	0.935442	0.48044	0.97619	0.66909	0.927607	0.990106	0.998622	0.994206	0.95873	0.995248	0.581577	0.0853929	0.686139	0.999932	0.657495	1	0.349504	0.748836	0.491425	0.758563	0.931189	0.999441	0.57708	0.53741	0.627913	0.819019	0.995606	0.888267	0.341929	0.772425	0.149522
Ergic2	0.192958	0.837996	0.682358	0.407693	0.892276	0.677585	0.838714	0.922239	0.985535	0.874221	0.997582	0.998041	0.997331	0.977551	0.985867	0.908446	0.652178	0.263976	0.167845	0.980968	0.988716	0.995058	0.991247	0.78445	0.998622	0.7159	0.998721	0.997346	0.388104	0.718813	0.693812	0.999932	0.976779	1	0.431301	0.878994	0.430822	0.804477	0.971815	0.999441	0.273853	0.835554	0.330073	0.688624	0.995606	0.773303	0.796828	0.942998	0.996329
Eif3k	0.476432	0.540435	0.901104	0.388309	0.308547	0.424133	0.201963	0.945821	0.928595	0.967694	0.997582	0.953233	0.997331	0.901424	0.38938	0.188581	0.054992	0.932338	0.292062	0.737813	0.0262925	0.705372	0.612191	0.160237	0.998622	0.792547	0.981634	0.372843	0.855315	0.890566	0.827183	0.999932	0.987566	1	0.833294	0.473039	0.158495	0.971428	0.787784	0.999441	0.160607	0.271648	0.0914589	0.600103	0.990195	0.583464	0.379991	0.772425	0.110613
Exoc3l4	0.273829	0.0591636	0.354755	0.695741	0.222605	0.467315	0.391328	0.922239	0.523913	0.694531	0.997582	0.953233	0.997331	0.901424	0.845104	0.470393	0.0228324	0.303756	0.996248	0.577476	0.646719	0.948309	0.812095	0.0861254	0.998622	0.998959	0.968564	0.906212	0.052736	0.0391616	0.295545	0.999932	0.48047	1	0.942154	0.94313	0.15131	0.98647	0.983317	0.999441	0.849303	0.532601	0.767185	0.950065	0.995606	0.927734	0.405655	0.772425	0.541692
Tril	0.206487	0.0206417	0.0272232	0.697406	0.0547516	0.88799	0.639807	0.922239	0.314987	0.248939	0.997582	0.953233	0.997331	0.938255	0.0111743	0.841307	0.176314	0.594047	0.734959	0.0250691	0.669785	0.307765	0.966346	0.348477	0.998622	0.947114	0.695584	0.911493	0.734874	0.0534532	0.539405	0.999932	0.543085	1	0.103069	0.095453	0.479542	0.631727	0.44221	0.999441	0.0543931	0.140894	0.931025	0.461844	0.990195	0.983059	0.590995	0.88616	0.952222
Lrwd1	0.814278	0.462414	0.16462	0.543258	0.575578	0.387032	0.1136	0.987845	0.911813	0.557432	0.997582	0.972725	0.997331	0.901424	0.650737	0.622211	0.866702	0.243482	0.95822	0.181184	0.135678	0.855556	0.877173	0.928645	0.998622	0.997109	0.955487	0.618177	0.560001	0.928446	0.508003	0.999932	0.988291	1	0.684052	0.450828	0.809696	0.911294	0.775838	0.999441	0.788696	0.289479	0.138704	0.934935	0.990195	0.637743	0.0524899	0.741388	0.56421
Sash3	0.596968	0.802472	0.352961	0.694056	0.684337	0.470169	0.366694	0.948409	0.982045	0.69442	0.997582	0.977609	0.997331	0.901424	0.207022	0.901546	0.735124	0.376632	0.798106	0.329688	0.558338	0.602456	0.988388	0.847041	0.998622	0.960779	0.955487	0.873628	0.907079	0.754811	0.721479	0.999932	0.986696	1	0.19715	0.468873	0.753359	0.702779	0.78544	0.999441	0.546196	0.504017	0.393708	0.799612	0.993877	0.796653	0.177333	0.764055	0.93702
Nuak2	0.621138	0.513081	0.357219	0.811686	0.972609	0.681307	0.538552	0.952504	0.922022	0.695608	0.997582	0.999856	0.997331	0.921144	0.204706	0.601111	0.940143	0.674236	0.492235	0.486273	0.632967	0.599621	0.867057	0.970227	0.998622	0.85953	0.959141	0.901209	0.686833	0.825843	0.779683	0.999932	0.987566	1	0.0798494	0.835443	0.988786	0.611505	0.961483	0.999441	0.766917	0.510791	0.591101	0.926334	0.994186	0.874135	0.386092	0.772425	0.984437
Rsrc1	0.260141	0.691401	0.851539	0.975622	0.0890347	0.46191	0.947484	0.922239	0.955734	0.951149	0.997582	0.953233	0.997331	0.992642	0.0243558	0.117711	0.281002	0.591585	0.854889	0.260649	0.655527	0.348503	0.507095	0.470925	0.998622	0.976779	0.955487	0.908059	0.590909	0.191712	0.908471	0.999932	0.809446	1	0.0752164	0.0250069	0.383511	0.608536	0.225062	0.999441	0.137119	0.880907	0.98758	0.578618	0.995606	0.994673	0.747191	0.932319	0.367301
Naa60	0.368773	0.700372	0.529572	0.489743	0.2898	0.806826	0.351132	0.922239	0.959744	0.797786	0.997582	0.953233	0.997331	0.901424	0.161068	0.819607	0.508444	0.136898	0.594949	0.718145	0.97027	0.574407	0.955039	0.673531	0.998622	0.900908	0.981634	0.994622	0.93034	0.951528	0.901055	0.999932	0.990512	1	0.495619	0.882354	0.30827	0.834652	0.971854	0.999441	0.179112	0.690401	0.260409	0.620902	0.995606	0.741902	0.850589	0.956884	0.229416
Ncbp3	0.225755	0.659398	0.103434	0.576751	0.439111	0.792243	0.570284	0.922239	0.947142	0.460144	0.997582	0.956353	0.997331	0.925886	0.731835	0.239702	0.0142684	0.171032	0.0244677	0.898972	0.955178	0.899955	0.677247	0.0612714	0.998622	0.474332	0.995417	0.990914	0.762752	0.932089	0.981808	0.999932	0.988291	1	0.14629	0.610589	0.236285	0.658783	0.855412	0.999441	0.097318	0.572994	0.33357	0.526208	0.995606	0.775915	0.407094	0.772425	0.856837
Klc4	0.947307	0.0995293	0.930933	0.0209236	0.059761	0.403142	0.21073	0.995432	0.647714	0.975444	0.997582	0.953233	0.997331	0.901424	0.0570251	0.624548	0.0294355	0.144498	0.512048	0.635837	0.00235445	0.455813	0.878593	0.104177	0.998622	0.865992	0.972637	0.239344	0.24423	0.091726	0.400682	0.999932	0.670849	1	0.162331	0.808599	0.154267	0.668817	0.956106	0.999441	0.182518	0.522198	0.0129912	0.624295	0.995606	0.391607	0.851697	0.956884	0.0589592
Tprgl	0.0849761	0.129	0.1781	0.180802	0.00942507	0.443881	0.483577	0.922239	0.70418	0.56847	0.997582	0.953233	0.997331	0.908825	0.116646	0.53561	0.767396	0.694348	0.00269593	0.722998	0.127209	0.531504	0.842104	0.867322	0.998622	0.286635	0.981634	0.603919	0.466017	0.109049	0.549091	0.999932	0.700308	1	0.203093	0.916196	0.467178	0.704935	0.978133	0.999441	0.010303	0.726897	0.201819	0.368494	0.995606	0.689972	0.0869377	0.741388	0.0339508
Rmdn3	0.727721	0.272491	0.0564127	0.551788	0.923546	0.20799	0.782392	0.978876	0.841251	0.356046	0.997582	0.999856	0.997331	0.962759	0.989051	0.290781	0.000208479	0.461818	0.620866	0.311176	0.0899264	0.996471	0.714413	0.00234695	0.998622	0.905791	0.955487	0.549615	0.894812	0.153325	0.816339	0.999932	0.763406	1	0.632017	0.183116	0.0804506	0.881853	0.576341	0.999441	0.675062	0.830388	0.471025	0.879628	0.995606	0.81362	0.783314	0.942998	0.111386
Fam13c	0.324169	0.516372	0.326118	0.64268	0.447595	0.396714	0.262478	0.922239	0.922022	0.680796	0.997582	0.95884	0.997331	0.901424	0.716655	0.657331	0.1581	0.456293	0.553898	0.610806	0.999436	0.892578	0.895092	0.325266	0.998622	0.883812	0.970126	0.999477	0.112072	0.150003	0.144248	0.999932	0.756848	1	0.304934	0.381912	0.361574	0.744474	0.731332	0.999441	0.895218	0.901504	0.682497	0.959556	0.995606	0.907085	0.293671	0.772425	0.362769
Swt1	0.684039	0.641	0.000249277	0.935097	0.941305	0.654443	0.449379	0.971533	0.944124	0.0163358	0.997582	0.999856	0.997331	0.902959	0.882856	0.370405	0.00488707	0.687075	0.857793	0.772345	0.601399	0.96185	0.757078	0.0275741	0.998622	0.977776	0.983221	0.891551	0.778611	0.981499	0.699731	0.999932	0.996844	1	0.967121	0.784482	0.961941	0.990632	0.945319	0.999441	0.727715	0.388928	0.412607	0.911074	0.990195	0.802001	0.0044305	0.46882	0.0946341
Scyl3	0.465427	0.864098	0.601221	0.920082	0.107231	0.896084	0.166742	0.94577	0.98985	0.828771	0.997582	0.953233	0.997331	0.901424	0.83584	0.425703	0.0159074	0.203906	0.315391	0.775453	0.540949	0.945822	0.789064	0.0660759	0.998622	0.802582	0.983221	0.864603	0.0909294	0.964225	0.360245	0.999932	0.992532	1	0.374937	0.326744	0.328086	0.763291	0.698222	0.999441	0.521788	0.896271	0.315351	0.795049	0.995606	0.765192	0.826036	0.948531	0.247005
Cluh	0.247549	0.0512858	0.192779	0.148624	0.27092	0.825325	0.250064	0.922239	0.496997	0.580562	0.997582	0.953233	0.997331	0.901424	0.887741	0.0736922	0.293489	0.293695	0.0810451	0.73383	0.258298	0.962889	0.405669	0.482644	0.998622	0.628886	0.981634	0.737771	0.991313	0.122209	0.709701	0.999932	0.724028	1	0.214707	0.348727	0.927852	0.719794	0.711811	0.999441	0.181347	0.230369	0.143489	0.62324	0.990195	0.638946	0.552792	0.858148	0.142226
Errfi1	0.227522	0.52712	0.000278502	0.701886	0.0679787	0.215996	0.263563	0.922239	0.924579	0.0175699	0.997582	0.953233	0.997331	0.901424	0.0634867	0.0192061	0.19317	0.137483	0.0234271	0.920009	0.492454	0.466251	0.197709	0.369816	0.998622	0.470323	0.996665	0.843505	0.663206	0.785167	0.641281	0.999932	0.987566	1	0.9197	0.0104213	0.323044	0.983883	0.132547	0.999441	0.0466413	0.153613	0.29387	0.445939	0.990195	0.75516	0.00394502	0.433488	0.113134
R3hdm2	0.850694	0.937005	0.196041	0.229774	0.331678	0.54587	0.488801	0.992312	0.993072	0.582947	0.997582	0.953233	0.997331	0.911678	0.241721	0.678685	0.143797	0.363036	0.942361	0.820548	0.24271	0.628541	0.901843	0.307133	0.998622	0.995166	0.986337	0.718123	0.566347	0.586876	0.657098	0.999932	0.937009	1	0.352367	0.917213	0.861582	0.758563	0.978133	0.999441	0.442312	0.761013	0.234315	0.775801	0.995606	0.72489	0.892834	0.957929	0.881297
Josd1	0.00062819	0.812996	0.377795	0.091918	0.0322408	0.0460151	0.116573	0.244163	0.984434	0.703716	0.997582	0.953233	0.997331	0.901424	0.000519492	0.146618	0.0603565	0.768871	0.00876272	0.318812	0.00316065	0.125211	0.56002	0.170683	0.998622	0.35813	0.955487	0.239344	0.145023	0.0655635	0.769823	0.999932	0.593767	1	0.382182	0.880038	0.01989	0.768311	0.971815	0.999441	0.00205217	0.234523	0.0534034	0.305832	0.990195	0.524145	0.19495	0.764055	0.0394631
Stt3b	0.230558	0.00380515	0.153346	0.838701	0.651477	0.983563	0.0566	0.922239	0.106138	0.540644	0.997582	0.977609	0.998939	0.901424	0.935275	0.0484722	0.000135674	0.854972	0.284094	0.525373	0.269947	0.978928	0.323148	0.00168249	0.998622	0.786027	0.964338	0.748297	0.459993	0.0231642	0.137295	0.999932	0.367777	1	0.518188	0.510489	0.634218	0.836633	0.807636	0.999441	0.213138	0.0941247	0.139473	0.6531	0.96761	0.637743	0.226822	0.772425	0.656461
Raver1	0.0807997	0.397497	0.0360272	0.130382	0.774977	0.870726	0.134405	0.922239	0.883019	0.290159	0.997582	0.982277	0.997331	0.901424	0.101689	0.615151	0.13312	0.0253236	0.537841	0.813077	0.390736	0.519752	0.874893	0.291548	0.998622	0.877941	0.985259	0.797521	0.246311	0.442442	0.924933	0.999932	0.911783	1	0.320346	0.82845	0.226065	0.747926	0.960187	0.999441	0.202284	0.668487	0.0552814	0.639307	0.995606	0.52941	0.80055	0.942998	0.104138
Tmem183a	0.170195	0.675503	0.916352	0.705498	0.16695	0.331674	0.915986	0.922239	0.95018	0.972726	0.997582	0.953233	0.997331	0.987385	0.016739	0.353504	0.329026	0.918543	0.470625	0.442654	0.6867	0.328325	0.748363	0.513935	0.998622	0.851892	0.955487	0.91837	0.977487	0.723922	0.863881	0.999932	0.978189	1	0.275462	0.965757	0.882043	0.744347	0.989771	0.999441	0.0128115	0.19476	0.633978	0.376942	0.990195	0.888549	0.928588	0.970591	0.0577277
Shroom1	0.529169	0.00316778	0.917735	0.330278	0.909086	0.361364	0.360435	0.947805	0.0931134	0.972726	0.997582	0.999354	0.997331	0.901424	0.786045	0.000148617	0.405439	0.354957	0.844092	0.0904687	0.232678	0.926151	0.00585867	0.579134	0.998622	0.973554	0.89763	0.705589	0.807376	0.00668535	0.931909	0.999932	0.201357	1	0.681339	7.46909e-05	0.836265	0.909743	0.00461708	0.999441	0.531011	0.177082	0.222889	0.795627	0.990195	0.707044	0.417254	0.772425	0.331642
Tspan33	0.509786	0.449767	0.56608	0.883848	0.711277	0.683966	0.551942	0.947805	0.906208	0.812696	0.997582	0.977609	0.997331	0.924282	0.0257993	0.885099	0.350355	0.803853	0.2539	0.233052	0.605884	0.35334	0.983926	0.532042	0.998622	0.768353	0.955487	0.892962	0.797689	0.771401	0.760061	0.999932	0.987566	1	0.0118225	0.382601	0.889965	0.439299	0.731332	0.999441	0.502322	0.420183	0.604395	0.794754	0.990195	0.877564	0.346031	0.772425	0.992067
Yipf2	0.947623	0.910871	0.206121	0.194483	0.910713	0.938444	0.20356	0.995432	0.991833	0.592915	0.997582	0.999515	0.997331	0.901424	0.287878	0.194723	0.447917	0.349211	0.0583128	0.874526	0.38992	0.65681	0.619758	0.619101	0.998622	0.599111	0.994278	0.797521	0.932812	0.933392	0.19292	0.999932	0.988291	1	0.0090432	0.239972	0.996758	0.43824	0.642203	0.999441	0.501524	0.60841	0.346064	0.794754	0.995606	0.782378	0.146653	0.760681	0.34821
Ero1b	0.538599	0.452578	0.203945	0.775399	0.65304	0.363651	0.820596	0.947805	0.908678	0.592263	0.997582	0.977609	0.997331	0.972302	0.142223	0.336686	0.679117	0.746926	0.749355	0.405849	0.85943	0.551747	0.736457	0.806633	0.998622	0.949573	0.955487	0.968717	0.851046	0.948505	0.962148	0.999932	0.989276	1	0.126375	0.918889	0.885091	0.652383	0.978133	0.999441	0.530882	0.299231	0.758623	0.795627	0.990195	0.926206	0.136987	0.744302	0.763064
Slc47a1	0.184426	0.688621	0.000204129	0.132846	0.967593	0.840184	0.00629215	0.922239	0.954461	0.0144127	0.997582	0.999856	0.997331	0.901424	0.94174	0.723081	0.186124	0.181875	0.31262	0.858458	0.0496339	0.981564	0.917392	0.360216	0.998622	0.801808	0.991497	0.455179	0.185207	0.568265	0.226978	0.999932	0.933345	1	0.553846	0.74053	0.742237	0.846464	0.92716	0.999441	0.45253	0.919951	0.0242972	0.783485	0.995606	0.439922	0.00770167	0.486037	0.28489
Pxdc1	0.919316	0.0549371	0.273622	0.41895	0.32052	0.985936	0.881743	0.995022	0.51079	0.646135	0.997582	0.953233	0.999056	0.983028	0.261855	0.14112	0.311688	0.985356	0.87461	0.618108	0.366738	0.641829	0.550656	0.499807	0.999529	0.982344	0.972637	0.792357	0.526321	0.16472	0.634486	0.999932	0.785242	1	0.337961	0.521644	0.55612	0.753353	0.812405	0.999441	0.562313	0.167925	0.487506	0.808389	0.990195	0.824033	0.506056	0.826063	0.165887
Inhca	0.728489	0.348697	0.733511	0.356849	0.558428	0.506372	0.377964	0.978876	0.872291	0.903449	0.997582	0.971366	0.997331	0.901424	0.570882	0.0764438	0.524029	0.183847	0.852117	0.97826	0.520315	0.809191	0.41321	0.686246	0.998622	0.976065	0.998721	0.854151	0.558833	0.80905	0.951598	0.999932	0.987566	1	0.523567	0.191981	0.570301	0.837494	0.586233	0.999441	0.87309	0.233909	0.19634	0.957172	0.990195	0.681219	0.345619	0.772425	0.579428
Tha1	0.196829	0.751979	0.979006	0.00841406	0.0161059	0.22546	0.253626	0.922239	0.973122	0.991345	0.997582	0.953233	0.997331	0.901424	0.0209283	0.845328	0.664464	0.285955	0.173171	0.267513	0.0158898	0.337319	0.967714	0.795462	0.998622	0.719312	0.955487	0.329886	0.41093	0.194573	0.170719	0.999932	0.811372	1	0.35677	0.281359	0.360372	0.759303	0.673745	0.999441	0.028365	0.591422	0.0253765	0.429185	0.995606	0.439922	0.904825	0.961441	0.0636767
Cmtr1	0.125141	0.265076	0.0387622	0.574348	0.756417	0.341115	0.911114	0.922239	0.835072	0.29885	0.997582	0.980881	0.997331	0.987385	0.0303911	0.214028	0.202755	0.398693	0.456207	0.315463	0.768755	0.375746	0.647045	0.381637	0.998622	0.846763	0.955487	0.942918	0.165066	0.874614	0.613177	0.999932	0.987566	1	0.0181642	0.809203	0.376777	0.465001	0.956106	0.999441	0.455035	0.182948	0.769213	0.785325	0.990195	0.927882	0.235058	0.772425	0.651255
Selenoo	0.95879	0.809291	0.527982	0.977851	0.952269	0.783273	0.0751447	0.996603	0.982719	0.797018	0.997582	0.999856	0.997331	0.901424	0.0858249	0.528306	0.0189073	0.0324273	0.139582	0.732935	0.278778	0.499437	0.839006	0.0750896	0.998622	0.695259	0.981634	0.75395	0.942752	0.767789	0.304445	0.999932	0.987566	1	0.00887771	0.575418	0.340423	0.43824	0.839329	0.999441	0.977182	0.953214	0.0757524	0.989917	0.996237	0.561686	0.646553	0.912379	0.140374
Dhdh	0.532681	0.111914	0.40703	0.328022	0.0365878	0.165596	0.441663	0.947805	0.669838	0.71897	0.997582	0.953233	0.997331	0.901424	0.513371	0.680634	0.634804	0.0422252	0.0179209	0.688803	0.792532	0.785282	0.903156	0.771549	0.998622	0.434014	0.980287	0.948903	0.403695	0.061941	0.860022	0.999932	0.582305	1	0.327132	0.457577	0.104228	0.751663	0.780079	0.999441	0.0354969	0.852731	0.15361	0.432389	0.995606	0.642139	0.781181	0.942998	0.0489699
Eif4e3	0.148293	0.250058	0.00217191	0.934498	0.934893	0.395421	0.751913	0.922239	0.825192	0.0616014	0.997582	0.999856	0.997331	0.9573	0.766973	0.629837	8.76702e-06	0.664741	0.220033	0.96222	0.971853	0.919091	0.881011	0.000186593	0.998622	0.753091	0.998116	0.99471	0.283774	0.213566	0.98856	0.999932	0.82847	1	0.395567	0.618019	0.76381	0.776927	0.858755	0.999441	0.325327	0.661899	0.716429	0.715928	0.995606	0.914575	0.351785	0.772425	0.0938259
Ngdn	0.560366	0.696897	0.157053	0.242328	0.692694	0.0741893	0.183127	0.947805	0.958114	0.545163	0.997582	0.977609	0.997331	0.901424	0.966871	0.459051	0.0341927	0.189676	0.301932	0.232894	0.133526	0.989827	0.808522	0.114954	0.998622	0.797151	0.955487	0.613161	0.858167	0.139059	0.946586	0.999932	0.739776	1	0.451036	0.591647	0.975156	0.818924	0.844601	0.999441	0.508305	0.292036	0.0904881	0.794754	0.990195	0.583312	0.0732654	0.741388	0.416177
Tamm41	0.781811	0.15952	0.000299728	0.264768	0.0938081	0.489813	0.367963	0.987567	0.751666	0.0177198	0.997582	0.953233	0.997331	0.901424	0.0635826	0.770443	0.652655	0.513115	0.645283	0.280983	0.0980441	0.466251	0.933747	0.784923	0.998622	0.912323	0.955487	0.562769	0.373263	0.100123	0.847512	0.999932	0.68683	1	0.119578	0.254006	0.37103	0.647581	0.653458	0.999441	0.221598	0.599635	0.177843	0.660116	0.995606	0.668086	0.0594436	0.741388	0.618305
Wdr53	0.903224	0.389696	0.90864	0.397767	0.939587	0.362787	0.371346	0.993268	0.880564	0.970351	0.997582	0.999856	0.997331	0.901424	0.944839	0.970611	0.159793	0.236553	0.994381	0.971593	0.209549	0.982144	0.999044	0.327531	0.998622	0.99885	0.998638	0.692114	0.921241	0.206585	0.998333	0.999932	0.82065	1	0.995746	0.143986	0.829189	0.998465	0.5281	0.999441	0.942498	0.93342	0.2513	0.973023	0.995606	0.733337	0.412419	0.772425	0.333671
C1galt1c1	0.0944597	0.0442644	0.112155	0.0367009	0.105176	0.0724146	0.065187	0.922239	0.468037	0.472295	0.997582	0.953233	0.997331	0.901424	0.0888664	0.591917	0.842937	0.474743	0.730285	0.381986	0.82192	0.504958	0.86304	0.913891	0.998622	0.946448	0.955487	0.956249	0.0856181	0.0622759	0.0518122	0.999932	0.583213	1	0.382951	0.384826	0.750594	0.768674	0.73252	0.999441	0.111862	0.72169	0.496382	0.540946	0.995606	0.827833	0.143568	0.754603	0.979567
Med28	0.275224	0.536377	0.344435	0.868485	0.764101	0.601082	0.952752	0.922239	0.928595	0.689017	0.997582	0.981399	0.997331	0.992892	0.244417	0.178749	0.993159	0.988978	0.83217	0.235781	0.914526	0.629974	0.599009	0.996551	0.999529	0.969951	0.955487	0.979139	0.541149	0.389845	0.866858	0.999932	0.880093	1	0.469435	0.0427283	0.917368	0.825044	0.299825	0.999441	0.371148	0.980977	0.954943	0.730665	0.997528	0.988378	0.450094	0.786337	0.672442
Chp1	0.792788	0.164395	0.805298	0.162728	0.145805	0.274631	0.600719	0.987567	0.759837	0.9352	0.997582	0.953233	0.997331	0.930876	0.434969	0.271271	0.0319265	0.252109	0.192013	0.3471	0.352921	0.737247	0.70032	0.11001	0.998622	0.732518	0.955487	0.782889	0.441768	0.068952	0.483135	0.999932	0.602683	1	0.836091	0.0576096	0.744019	0.972279	0.345657	0.999441	0.274165	0.846319	0.212981	0.688624	0.995606	0.695031	0.801677	0.942998	0.225395
Pik3ip1	0.135369	0.0274051	0.831535	0.200782	0.41236	0.196298	0.111026	0.922239	0.363854	0.946938	0.997582	0.955323	0.997331	0.901424	0.0298508	0.0118083	0.0154447	0.053421	0.470935	0.131747	0.0930176	0.37513	0.147998	0.0646683	0.998622	0.852289	0.945357	0.557631	0.672153	0.0288738	0.895185	0.999932	0.423038	1	0.222153	0.001825	0.678045	0.726828	0.0449717	0.999441	0.0818806	0.535295	0.0406302	0.509549	0.995606	0.485478	0.778359	0.942998	0.556639
Emc9	0.644612	0.217788	0.950113	0.663903	0.567528	0.888365	0.243994	0.960583	0.805989	0.98109	0.997582	0.972625	0.997331	0.901424	0.165621	0.0118606	0.137268	0.441792	0.613986	0.116821	0.364519	0.57961	0.14806	0.297369	0.998622	0.905223	0.921557	0.790868	0.907276	0.300196	0.607543	0.999932	0.858964	1	0.2066	0.00321147	0.940222	0.708562	0.0643147	0.999441	0.477498	0.510716	0.298008	0.794754	0.994186	0.756326	0.777676	0.942998	0.515323
Ctc1	0.356445	0.161144	0.0613377	0.196962	0.0583459	0.287275	0.192511	0.922239	0.754813	0.371547	0.997582	0.953233	0.997331	0.901424	0.0116321	0.387447	0.165452	0.363927	0.58733	0.279882	0.0535129	0.308457	0.765865	0.334895	0.998622	0.89942	0.955487	0.46827	0.544813	0.0668314	0.947051	0.999932	0.595902	1	0.0698393	0.132656	0.425477	0.598704	0.512304	0.999441	0.0773514	0.806445	0.094441	0.499858	0.995606	0.58778	0.362985	0.772425	0.257695
Eif1b	0.570547	0.547839	0.159387	0.63286	0.762035	0.524937	0.29193	0.948409	0.929315	0.548114	0.997582	0.981399	0.997331	0.901424	0.635826	0.841602	0.0193751	0.524131	0.696434	0.958599	0.275769	0.846929	0.966531	0.0765426	0.998622	0.932946	0.998116	0.753812	0.811225	0.364941	0.702149	0.999932	0.873844	1	0.954687	0.97905	0.723216	0.988676	0.994826	0.999441	0.578472	0.973085	0.303555	0.81947	0.997528	0.756552	0.655225	0.912379	0.353962
Fam216a	0.235981	0.710339	0.664735	0.417335	0.819581	0.774994	0.0549135	0.922239	0.963519	0.863944	0.997582	0.989556	0.997331	0.901424	0.277475	0.122688	0.440575	0.508849	0.680915	0.193183	0.017614	0.649494	0.515582	0.612634	0.998622	0.927085	0.955487	0.332413	0.515353	0.678826	0.490688	0.999932	0.96296	1	0.659118	0.0548588	0.231319	0.896248	0.336678	0.999441	0.287826	0.96447	0.0440639	0.691408	0.99683	0.49026	0.435611	0.778092	0.547105
Ssu72	0.143172	0.338881	0.0163985	0.717143	0.378554	0.995823	0.746133	0.922239	0.868154	0.190447	0.997582	0.953233	0.999056	0.9573	0.414464	0.0221866	0.0339955	0.418435	0.642353	0.198089	0.183512	0.721074	0.213902	0.114537	0.998622	0.911542	0.955487	0.668867	0.258927	0.560864	0.750088	0.999932	0.933345	1	0.463722	0.0272554	0.225258	0.823032	0.234901	0.999441	0.58752	0.839715	0.380996	0.825162	0.995606	0.790002	0.199529	0.764055	0.489998
Zfas1	0.486399	0.242943	0.450784	0.505118	0.498853	0.261242	0.222573	0.947805	0.823226	0.750003	0.997582	0.965552	0.997331	0.901424	0.134744	0.102938	0.00606711	0.250827	0.99683	0.149827	0.250839	0.545427	0.477364	0.0323671	0.998622	0.998991	0.946526	0.728868	0.988064	0.139893	0.72701	0.999932	0.740249	1	0.287889	0.0260271	0.959815	0.744347	0.229291	0.999441	0.291395	0.948957	0.174714	0.692184	0.996237	0.665649	0.0271654	0.650575	0.765924
Ecrg4	0.961314	1.07e-07	0.304396	0.320151	0.992934	0.300217	0.889746	0.996603	1.62e-05	0.666596	0.997582	0.999856	0.997331	0.984739	0.681382	0.000263735	0.477493	0.0913515	0.718159	0.0237536	0.368901	0.87427	0.00931994	0.646455	0.998622	0.940812	0.682826	0.792357	0.822435	0.00191926	0.495447	0.999932	0.0871363	1	0.817397	0.260405	0.155869	0.96747	0.659987	0.999441	0.638077	3.7342e-06	0.444769	0.856727	0.00146759	0.808759	NA	NA	0.329476
Rpl7l1	0.867154	0.550153	0.890165	0.0710068	0.476381	0.876135	0.255143	0.993268	0.929315	0.96438	0.997582	0.965358	0.997331	0.901424	0.844112	0.994642	0.275781	0.4103	0.484769	0.714859	0.0688219	0.947804	0.999044	0.465161	0.998622	0.858114	0.981634	0.507666	0.719857	0.640582	0.581531	0.999932	0.95281	1	0.785412	0.805547	0.565643	0.957383	0.954403	0.999441	0.500616	0.767559	0.0408439	0.794754	0.995606	0.485478	0.823641	0.947306	0.35374
Hspbp1	0.315562	0.278893	0.169664	0.975099	0.193927	0.776759	0.369886	0.922239	0.845698	0.563947	0.997582	0.953233	0.997331	0.901424	0.0434328	0.982657	0.627107	0.833421	0.388717	0.102111	0.388175	0.432224	0.999044	0.765759	0.998622	0.828788	0.904506	0.797197	0.91627	0.553704	0.580815	0.999932	0.933345	1	0.317173	0.262897	0.685467	0.746158	0.66165	0.999441	0.078118	0.249509	0.45056	0.5026	0.990195	0.808759	0.542124	0.851583	0.861429
Rnaseh2c	0.031852	0.654837	0.2378	0.0278413	0.0739909	0.7437	0.0670932	0.862875	0.946344	0.614048	0.997582	0.953233	0.997331	0.901424	0.192473	0.869097	0.504458	0.192688	0.0125454	0.515953	0.0162107	0.591175	0.977227	0.669855	0.998622	0.389727	0.964094	0.329886	0.644093	0.812527	0.63042	0.999932	0.987566	1	0.38862	0.735185	0.494778	0.770842	0.923638	0.999441	0.0267437	0.607349	0.0213399	0.42584	0.995606	0.422285	0.642507	0.912379	0.123354
Zcchc18	0.297218	0.0571488	0.201545	0.622033	0.845625	0.0725573	0.526178	0.922239	0.518219	0.58947	0.997582	0.992504	0.997331	0.916421	0.321256	0.946876	0.609945	0.944415	0.053318	0.844566	0.325768	0.6724	0.999044	0.751932	0.998895	0.590859	0.989025	0.774437	0.462491	0.0127117	0.928671	0.999932	0.281756	1	0.0487216	0.7785	0.532146	0.554895	0.943062	0.999441	0.464837	0.993037	0.456832	0.790448	0.998318	0.809111	0.121473	0.741388	0.590258
Cep19	0.200051	0.000586881	0.302496	0.251751	0.37073	0.893691	0.475288	0.922239	0.0240903	0.666596	0.997582	0.953233	0.997331	0.908066	0.465415	0.000224646	0.0197743	0.492148	0.0904599	0.395682	0.158642	0.756813	0.00821662	0.0776433	0.998622	0.640786	0.955487	0.64084	0.889817	0.033037	0.742207	0.999932	0.451308	1	0.363673	0.0490996	0.711921	0.759531	0.325539	0.999441	0.0471413	0.00436457	0.110786	0.447413	0.23434	0.609155	0.661336	0.912379	0.805584
Ndufv3	0.648914	0.5199	0.191606	0.678652	0.552517	0.866321	0.477944	0.96139	0.922022	0.580095	0.997582	0.970444	0.997331	0.908066	0.348639	0.24619	0.90518	0.356154	0.183539	0.530821	0.15653	0.68098	0.681631	0.950033	0.998622	0.724903	0.965098	0.638878	0.935879	0.792516	0.884446	0.999932	0.987566	1	0.2107	0.176722	0.288396	0.714868	0.568158	0.999441	0.264231	0.431889	0.245049	0.683197	0.990195	0.731238	0.40616	0.772425	0.999065
Smdt1	0.324439	0.110469	0.45464	0.125517	0.682907	0.966833	0.161907	0.922239	0.667886	0.752385	0.997582	0.977609	0.997331	0.901424	0.532694	0.0957892	0.465027	0.0686226	0.422055	0.719971	0.10192	0.793091	0.462227	0.63425	0.998622	0.841481	0.981634	0.569916	0.737518	0.290888	0.871732	0.999932	0.858964	1	0.734494	0.344501	0.838398	0.93474	0.709122	0.999441	0.261016	0.24522	0.037584	0.681539	0.990195	0.478192	0.423293	0.772935	0.454002
Wdr83	0.170157	0.184995	0.994665	0.233945	0.958262	0.953014	0.982151	0.922239	0.7791	0.998132	0.997582	0.999856	0.997331	0.996979	0.312633	0.320236	0.336245	0.528043	0.317799	0.325029	0.365777	0.671909	0.726783	0.520281	0.998622	0.802582	0.955487	0.791917	0.347378	0.346522	0.363418	0.999932	0.86556	1	0.960869	0.983235	0.0444019	0.988971	0.995633	0.999441	0.326522	0.362996	0.447969	0.716878	0.990195	0.808759	0.412215	0.772425	0.996364
Fam174c	0.191645	0.734081	0.299131	0.529846	0.773594	0.510611	0.848141	0.922239	0.969712	0.66449	0.997582	0.982	0.997331	0.979689	0.856149	0.644751	0.142063	0.897957	0.155626	0.763592	0.466021	0.952798	0.887878	0.304521	0.998622	0.707344	0.981682	0.831075	0.465212	0.495802	0.749754	0.999932	0.930711	1	0.430142	0.479032	0.640198	0.804461	0.791877	0.999441	0.270395	0.790652	0.579941	0.685898	0.995606	0.868982	0.18934	0.764055	0.793714
1600012H06Rik	0.0545057	0.45577	0.0272244	0.269809	0.000288272	0.0915307	0.332379	0.922239	0.90969	0.248939	0.997582	0.953233	0.997331	0.901424	0.00024983	0.0606221	0.685157	0.173149	0.327821	0.913563	0.720155	0.0905439	0.365042	0.810349	0.998622	0.808162	0.996665	0.927636	0.10617	0.315737	0.836489	0.999932	0.858964	1	0.0397431	0.228019	0.426911	0.536531	0.630026	0.999441	0.00246862	0.192147	0.223877	0.305832	0.990195	0.708492	0.609102	0.896961	0.0663098
Ttc23	0.522364	0.24619	0.542776	0.698671	0.391674	0.73312	0.203838	0.947805	0.82358	0.803987	0.997582	0.953233	0.997331	0.901424	0.782213	0.496827	0.744722	0.108729	0.187496	0.127158	0.790807	0.925346	0.827061	0.853169	0.998622	0.727087	0.935279	0.948791	0.860725	0.311747	0.557462	0.999932	0.858964	1	0.459756	0.101825	0.333694	0.822232	0.456571	0.999441	0.268915	0.608765	0.23916	0.685446	0.995606	0.728867	0.13106	0.741388	0.994239
Mettl6	0.891874	0.480243	0.455273	0.883463	0.120488	0.18725	0.279257	0.993268	0.914906	0.752385	0.997582	0.953233	0.997331	0.901424	0.158264	0.0216586	0.0211991	0.879715	0.901721	0.675606	0.283286	0.571526	0.212739	0.0816686	0.998622	0.988132	0.977826	0.756629	0.329513	0.650868	0.539072	0.999932	0.957106	1	0.46498	0.0526167	0.54949	0.823864	0.331718	0.999441	0.209715	0.171251	0.367558	0.647361	0.990195	0.7853	0.900276	0.959519	0.0554108
1600014C10Rik	0.0857608	0.113335	4.58e-05	0.494018	0.00740657	0.649946	0.321175	0.922239	0.674269	0.00520679	0.997582	0.953233	0.997331	0.901424	0.018274	0.0191547	3.54611e-10	0.906554	0.105741	0.419894	0.198529	0.329389	0.197644	4.27352e-08	0.998622	0.659313	0.955487	0.68169	0.501671	0.232087	0.904524	0.999932	0.852679	1	0.63072	0.125542	0.56597	0.881853	0.500887	0.999441	0.00265788	0.483443	0.19317	0.305832	0.992988	0.678814	0.148617	0.763104	0.453607
Lmntd2	0.92755	0.584191	0.249299	0.802862	0.673539	0.860517	0.471226	0.995432	0.933063	0.624961	0.997582	0.977609	0.997331	0.908066	0.731683	0.218628	0.716819	0.813987	0.44584	0.372831	0.258873	0.899955	0.653199	0.833203	0.998622	0.846424	0.955487	0.738964	0.729589	0.565886	0.744556	0.999932	0.933345	1	0.473126	0.10395	0.335331	0.826149	0.459364	0.999441	0.839594	0.807752	0.518981	0.948777	0.995606	0.839735	0.410915	0.772425	0.99003
Tmem33	0.396693	0.367726	0.0988198	0.177414	0.106654	0.356931	0.887201	0.923029	0.873319	0.453125	0.997582	0.953233	0.997331	0.984522	0.151085	0.543019	0.333809	0.122242	0.0484239	0.759911	0.992305	0.564937	0.844769	0.518016	0.998622	0.584235	0.981634	0.997647	0.695416	0.257189	0.359717	0.999932	0.858964	1	0.76036	0.657691	0.20624	0.948972	0.88281	0.999441	0.0344456	0.990243	0.274652	0.432389	0.99789	0.743729	0.31757	0.772425	0.0845154
Hacl1	0.540807	0.169492	0.0547917	0.0873042	0.777947	0.724549	0.978138	0.947805	0.764871	0.351325	0.997582	0.983105	0.997331	0.99669	0.885653	0.722953	0.225907	0.48166	0.862828	0.57962	0.361414	0.962748	0.917354	0.409489	0.998622	0.979223	0.968564	0.788417	0.534735	0.172968	0.166801	0.999932	0.797572	1	0.928247	0.928205	0.903447	0.984932	0.98001	0.999441	0.787856	0.541901	0.300604	0.934566	0.995606	0.756326	0.43125	0.774178	0.239917
Zfp654	0.84712	0.830166	0.825043	0.779556	0.52245	0.455168	0.197921	0.992157	0.985535	0.943305	0.997582	0.968789	0.997331	0.901424	0.662348	0.502567	0.677898	0.925184	0.909065	0.925895	0.115198	0.861978	0.828902	0.805861	0.998622	0.9891	0.996665	0.586477	0.558422	0.526484	0.504062	0.999932	0.932406	1	0.776013	0.575665	0.26879	0.956176	0.839377	0.999441	0.739594	0.676515	0.267654	0.914853	0.995606	0.742088	0.876184	0.956884	0.5336
Wfdc2	0.52704	5.56e-07	0.301774	0.310966	0.261703	0.422215	0.0177665	0.947805	6.45e-05	0.666596	0.997582	0.953233	0.997331	0.901424	0.919993	6.63335e-08	0.0762354	0.323378	0.827798	0.317906	0.00792802	0.975514	8.54157e-06	0.201126	0.998622	0.968779	0.955487	0.274105	0.174459	0.00021308	0.375536	0.999932	0.0198504	1	0.41492	3.48343e-05	0.242511	0.793543	0.00247957	0.999441	0.45325	0.00122395	0.0154132	0.784009	0.10088	0.394611	0.124176	0.741388	0.139738
Cnpy3	0.595355	0.979073	0.906434	0.445041	0.714111	0.28756	0.504252	0.948409	0.996541	0.969858	0.997582	0.977609	0.997331	0.913951	0.850336	0.96125	0.338041	0.784629	0.404865	0.309576	0.20989	0.950096	0.999044	0.522028	0.998622	0.833087	0.955487	0.692404	0.892847	0.486871	0.908907	0.999932	0.927727	1	0.656151	0.550255	0.50692	0.894526	0.827496	0.999441	0.523058	0.430762	0.301841	0.795049	0.990195	0.756326	0.683743	0.912379	0.99401
Coa5	0.858562	0.779169	0.000726665	0.658976	0.361856	0.894954	0.794358	0.993268	0.978525	0.0314777	0.997582	0.953233	0.997331	0.963882	0.471584	0.468453	0.0106284	0.839793	0.999667	0.319364	0.374445	0.760398	0.811099	0.0493125	0.998622	0.99988	0.955487	0.792979	0.50366	0.875841	0.886928	0.999932	0.987566	1	0.653624	0.304262	0.4824	0.893042	0.684688	0.999441	0.557497	0.715186	0.582744	0.805952	0.995606	0.869494	0.0281189	0.661944	0.35346
Cklf	0.55294	0.493145	0.516008	0.360093	0.705249	0.672232	0.572371	0.947805	0.917345	0.790221	0.997582	0.977609	0.997331	0.927053	0.91115	0.735625	0.227597	0.988114	0.293137	0.192966	0.794087	0.972721	0.922304	0.411505	0.999529	0.793462	0.955487	0.948903	0.835548	0.813052	0.29569	0.999932	0.987566	1	0.363274	0.27066	0.892202	0.75936	0.666381	0.999441	0.530173	0.446094	0.828952	0.795627	0.990195	0.953346	0.347005	0.772425	0.980409
Ccdc28a	0.390265	0.817758	0.887782	0.0373776	0.795624	0.309367	0.345074	0.923029	0.985454	0.96438	0.997582	0.986063	0.997331	0.901424	0.120662	0.0855135	0.461436	0.119491	0.291976	0.395899	0.108503	0.53551	0.440694	0.631276	0.998622	0.792542	0.955487	0.576864	0.43926	0.41773	0.39124	0.999932	0.896346	1	0.0958981	0.0796413	0.997499	0.625877	0.406469	0.999441	0.687765	0.507897	0.0352955	0.888158	0.993877	0.471545	0.19301	0.764055	0.576727
Cfap126	0.216792	0.669047	0.763771	0.239244	0.583324	0.228451	0.674949	0.922239	0.949323	0.915718	0.997582	0.973903	0.997331	0.942277	0.139755	0.136108	0.0861794	0.235517	0.136231	0.161921	0.157707	0.551511	0.541707	0.21836	0.998622	0.695259	0.946526	0.639538	0.642445	0.623324	0.608085	0.999932	0.947074	1	0.628518	0.0624496	0.305808	0.881821	0.359894	0.999441	0.1537	0.185379	0.207134	0.593737	0.990195	0.692375	0.427774	0.773307	0.539216
Ascc2	0.0036157	0.0755892	0.296299	0.0205367	0.265799	0.376469	0.107988	0.653608	0.584258	0.662043	0.997582	0.953233	0.997331	0.901424	0.0303616	0.0399979	0.707639	0.138843	0.0279921	0.360275	0.0104276	0.375746	0.298246	0.826464	0.998622	0.494461	0.955487	0.28892	0.186373	0.0945136	0.527178	0.999932	0.678563	1	0.981744	0.0609802	0.535923	0.994698	0.355673	0.999441	0.00566239	0.545085	0.00793872	0.320762	0.995606	0.386631	0.65182	0.912379	0.106766
Osgin1	0.663721	0.448178	0.0413819	0.404707	0.591877	0.606938	0.291496	0.966744	0.905216	0.306772	0.997582	0.975595	0.997331	0.901424	0.928978	0.955516	0.253671	0.804095	0.34661	0.261852	0.161446	0.977729	0.999044	0.441003	0.998622	0.810791	0.955487	0.643877	0.5415	0.231597	0.483528	0.999932	0.852274	1	0.30244	0.230858	0.242026	0.744474	0.633141	0.999441	0.623498	0.55765	0.366656	0.848058	0.995606	0.785152	0.21321	0.772425	0.318772
Pgp	0.690326	0.277471	0.174063	0.30229	0.867479	0.924191	0.434813	0.971896	0.845698	0.565637	0.997582	0.993118	0.997331	0.901424	0.698519	0.10395	0.163639	0.216325	0.27766	0.740379	0.274822	0.883131	0.479455	0.332227	0.998622	0.783599	0.981634	0.752476	0.85476	0.528455	0.845046	0.999932	0.932406	1	0.353286	0.129148	0.912446	0.758563	0.507285	0.999441	0.665591	0.314374	0.13021	0.872961	0.990195	0.63513	0.340475	0.772425	0.683806
Rbmxl2	0.269494	0.327227	0.3236	0.447029	0.291276	0.370925	0.441335	0.922239	0.864227	0.679436	0.997582	0.953233	0.997331	0.901424	0.166458	0.461943	0.00591698	0.964365	0.58958	0.904987	0.556267	0.580188	0.808574	0.0318368	0.998895	0.8997	0.996121	0.872638	0.70934	0.622971	0.765417	0.999932	0.947074	1	0.292847	0.76265	0.752692	0.744347	0.936469	0.999441	0.296501	0.387577	0.466499	0.697105	0.990195	0.812742	0.332135	0.772425	0.345726
Fam110b	0.610161	0.903532	0.648802	0.50912	0.171243	0.491645	0.632817	0.949851	0.991833	0.854884	0.997582	0.953233	0.997331	0.935979	0.0192251	0.987817	0.00220441	0.639887	0.780193	0.540285	0.456404	0.332781	0.999044	0.01507	0.998622	0.95711	0.965098	0.827425	0.500632	0.617211	0.860277	0.999932	0.947074	1	0.0141743	0.705498	0.835994	0.439299	0.909559	0.999441	0.243743	0.649044	0.490107	0.676585	0.995606	0.825869	0.271683	0.772425	0.429263
C8g	0.798186	0.393909	0.676064	0.482665	0.412407	0.604291	0.156092	0.987845	0.883019	0.870787	0.997582	0.955323	0.997331	0.901424	0.347868	0.160646	0.045427	0.13128	0.507399	0.686122	0.384715	0.680539	0.578129	0.140836	0.998622	0.864205	0.980287	0.797041	0.553105	0.478981	0.260162	0.999932	0.926738	1	0.930332	0.0957582	0.468636	0.984965	0.44254	0.999441	0.315778	0.692087	0.215918	0.711567	0.995606	0.697926	0.415663	0.772425	0.350118
Dnajb13	0.786883	0.190081	0.602389	0.972704	0.626138	0.601772	0.368052	0.987567	0.786973	0.828946	0.997582	0.976713	0.997331	0.901424	0.696868	0.162325	0.102365	0.315384	0.513349	0.515406	0.883686	0.882223	0.580796	0.245811	0.998622	0.865992	0.964094	0.9742	0.615971	0.498606	0.490715	0.999932	0.930711	1	0.3308	0.292022	0.369901	0.753353	0.679183	0.999441	0.920685	0.240532	0.562873	0.965163	0.990195	0.860778	0.407491	0.772425	0.555068
Mfsd2a	0.549333	0.94512	0.54501	0.289196	0.144895	0.566106	0.847747	0.947805	0.993072	0.805443	0.997582	0.953233	0.997331	0.979689	0.32714	5.99381e-06	0.00135244	0.378477	0.243043	3.48561e-06	0.301768	0.673097	0.000385903	0.0103538	0.998622	0.761836	0.00297861	0.762942	0.186167	0.625833	0.536344	0.999932	0.947453	1	6.82754e-06	9.17628e-25	0.347113	0.00427677	8.62203e-22	0.999441	0.494698	0.733441	0.362019	0.794754	0.995606	0.784383	0.654932	0.912379	0.141113
1700019D03Rik	0.653494	0.0351647	0.410888	0.571269	0.427872	0.728287	0.734821	0.962979	0.417288	0.722204	0.997582	0.955323	0.997331	0.95505	0.177335	0.968743	0.00797775	0.708407	0.831602	0.0526033	0.578328	0.582089	0.999044	0.03991	0.998622	0.969951	0.820317	0.881965	0.908694	0.11866	0.87444	0.999932	0.717968	1	0.337281	0.188491	0.919605	0.753353	0.582634	0.999441	0.342849	0.135939	0.445301	0.72557	0.990195	0.808759	0.0955939	0.741388	0.611633
Ift43	0.553264	0.000432043	0.080746	0.845055	0.271158	0.26307	0.0889573	0.947805	0.0190667	0.414687	0.997582	0.953233	0.997331	0.901424	0.123116	0.000494061	0.000128604	0.54888	0.572374	0.0617559	0.263518	0.536851	0.014933	0.00161184	0.998622	0.892019	0.847453	0.741732	0.874303	0.0276187	0.161146	0.999932	0.413313	1	0.191367	0.0610275	0.770338	0.702	0.355716	0.999441	0.362441	0.00674168	0.305809	0.729552	0.308999	0.757942	0.174681	0.764055	0.261845
Nat8f4	0.584704	0.584304	0.27128	0.948314	0.950612	0.180458	0.169113	0.948409	0.933063	0.644109	0.997582	0.999856	0.997331	0.901424	0.721895	0.532231	0.313113	0.41515	0.903771	0.132854	0.459263	0.895699	0.841206	0.500817	0.998622	0.988762	0.946526	0.828237	0.645771	0.201707	0.38411	0.999932	0.818329	1	0.844027	0.131634	0.918864	0.975582	0.51179	0.999441	0.759023	0.53937	0.293295	0.923208	0.995606	0.75516	0.598943	0.889807	0.578123
Slc17a9	0.307365	0.872109	0.371399	0.887876	0.975721	0.204899	0.389668	0.922239	0.990553	0.700978	0.997582	0.999856	0.997331	0.901424	0.0584819	0.789459	0.550828	0.949363	0.405184	0.146818	0.447165	0.458873	0.941698	0.707863	0.998895	0.833087	0.946526	0.823056	0.454726	0.306041	0.463675	0.999932	0.858964	1	0.0449951	0.186782	0.560973	0.548841	0.580376	0.999441	0.496184	0.443317	0.624044	0.794754	0.990195	0.885875	0.124388	0.741388	0.609649
Mtfp1	0.298013	0.0518254	0.519612	0.733787	0.0701751	0.644371	0.0627974	0.922239	0.499489	0.791844	0.997582	0.953233	0.997331	0.901424	0.326257	0.486922	0.17521	0.444183	0.141341	0.0608399	0.537053	0.673097	0.820159	0.34745	0.998622	0.695259	0.844115	0.863548	0.698087	0.108898	0.178545	0.999932	0.700308	1	0.777996	0.148738	0.839842	0.956176	0.535459	0.999441	0.0372269	0.215953	0.189177	0.432389	0.990195	0.677941	0.613735	0.898196	0.0407935
1700020L24Rik	0.323175	0.65832	0.0167294	0.885206	0.343757	0.627157	0.201608	0.922239	0.946643	0.19201	0.997582	0.953233	0.997331	0.901424	0.313826	0.0585354	0.667759	0.62457	0.642478	0.303643	0.159796	0.6724	0.358081	0.798287	0.998622	0.911542	0.955487	0.643072	0.941235	0.939322	0.203897	0.999932	0.988291	1	0.80052	0.0376615	0.179758	0.962942	0.276418	0.999441	0.26969	0.625	0.495258	0.685898	0.995606	0.827573	0.0892449	0.741388	0.999777
Tsacc	0.1704	0.877693	0.00540803	0.334394	0.825623	0.00838936	0.50423	0.922239	0.990553	0.104645	0.997582	0.989556	0.997331	0.913951	0.164679	0.0769976	0.706632	0.845409	0.747483	0.671629	0.994688	0.578414	0.41434	0.825957	0.998622	0.94918	0.977763	0.997992	0.256838	0.0144033	0.125788	0.999932	0.29869	1	0.29139	0.312722	0.875941	0.744347	0.689272	0.999441	0.37347	0.138606	0.875666	0.730665	0.990195	0.966692	0.0322034	0.687686	0.787985
Mtres1	0.804964	0.854823	0.352746	0.575177	0.725787	0.79055	0.693582	0.987845	0.987825	0.694412	0.997582	0.977668	0.997331	0.946938	0.439672	0.784127	0.104146	0.508266	0.585788	0.717337	0.649567	0.739663	0.938548	0.248722	0.998622	0.89942	0.981634	0.906499	0.690495	0.746098	0.889085	0.999932	0.984519	1	0.282562	0.610324	0.875387	0.744347	0.855412	0.999441	0.94348	0.949297	0.499925	0.973023	0.996237	0.829966	0.806775	0.943227	0.419061
Rubcn	0.648784	0.830043	0.451018	0.643836	0.884262	0.0644784	0.615326	0.96139	0.985535	0.750003	0.997582	0.996967	0.997331	0.932778	0.441347	0.133108	0.824077	0.677997	0.366644	0.468924	0.52178	0.740631	0.537001	0.903362	0.998622	0.821201	0.957632	0.854496	0.663204	0.167663	0.98199	0.999932	0.788631	1	0.137933	0.529514	0.910387	0.657331	0.816294	0.999441	0.844096	0.219553	0.506743	0.948777	0.990195	0.833974	0.159362	0.764055	0.53669
Polr1has	0.622863	0.904059	0.799378	0.743874	0.474709	0.353122	0.616821	0.952766	0.991833	0.93353	0.997582	0.965358	0.997331	0.93283	0.663436	0.933477	0.846046	0.975983	0.41466	0.305417	0.896086	0.862797	0.997927	0.915754	0.999421	0.838296	0.955487	0.97798	0.890336	0.573276	0.571303	0.999932	0.933345	1	0.803684	0.481791	0.972676	0.964297	0.793372	0.999441	0.387322	0.46402	0.88594	0.738859	0.990195	0.968337	0.467056	0.796955	0.439233
Rnf185	0.402363	0.491291	0.734632	0.246237	0.0336369	0.89069	0.520449	0.923029	0.917345	0.903449	0.997582	0.953233	0.997331	0.916141	0.42836	0.516817	0.496862	0.796092	0.0238147	0.208031	0.180442	0.732301	0.834148	0.663895	0.998622	0.472274	0.955487	0.66564	0.290965	0.573467	0.610935	0.999932	0.933345	1	0.281005	0.0872166	0.477759	0.744347	0.424385	0.999441	0.0738723	0.803895	0.276106	0.493483	0.995606	0.744691	0.358386	0.772425	0.156359
Cir1	0.857754	0.645196	0.377848	0.33801	0.974236	0.4827	0.802984	0.993268	0.945347	0.703716	0.997582	0.999856	0.997331	0.967048	0.835152	0.715918	0.208521	0.454918	0.716391	0.602524	0.999477	0.945822	0.914352	0.389137	0.998622	0.940812	0.968564	0.999477	0.927267	0.37124	0.344345	0.999932	0.873912	1	0.594985	0.530633	0.541557	0.866476	0.816629	0.999441	0.873749	0.847209	0.675749	0.957349	0.995606	0.907085	0.884638	0.956928	0.529573
Ikbip	0.205616	0.405084	0.141404	0.67497	0.630127	0.905322	0.398589	0.922239	0.88657	0.523483	0.997582	0.976856	0.997331	0.901424	0.00207159	0.737943	0.0301966	0.571281	0.120527	0.137208	0.430317	0.187648	0.923289	0.106072	0.998622	0.682505	0.946526	0.812679	0.528587	0.58459	0.79183	0.999932	0.935463	1	0.00312176	0.152516	0.849111	0.340264	0.538403	0.999441	0.253206	0.511908	0.374767	0.679092	0.994186	0.786802	0.488445	0.811912	0.309199
Psenen	0.304211	0.658025	0.180925	0.876186	0.0881378	0.860067	0.5433	0.922239	0.946641	0.57069	0.997582	0.953233	0.997331	0.923149	0.151549	0.269995	0.00348369	0.689858	0.158714	0.853913	0.836812	0.564937	0.698763	0.0213198	0.998622	0.710435	0.990118	0.961618	0.59246	0.89046	0.530178	0.999932	0.987566	1	0.996802	0.371824	0.920384	0.998502	0.723891	0.999441	0.101536	0.760414	0.777311	0.528767	0.995606	0.930189	0.612183	0.897261	0.963957
Sgf29	0.53168	0.973696	0.0925157	0.116639	0.717749	0.822538	0.400373	0.947805	0.995984	0.438551	0.997582	0.977609	0.997331	0.901424	0.496861	0.784386	0.760454	0.162226	0.677907	0.994928	0.170595	0.775701	0.938548	0.862484	0.998622	0.925093	0.999497	0.653728	0.8513	0.909969	0.581373	0.999932	0.987566	1	0.859603	0.801556	0.942542	0.977124	0.952822	0.999441	0.451957	0.811798	0.0844871	0.783058	0.995606	0.575497	0.931706	0.971511	0.184692
Clip4	0.152324	2.3e-07	0.00017052	0.784147	0.4358	0.971891	0.731916	0.922239	3.04e-05	0.0132002	0.997582	0.955323	0.997331	0.954056	0.212304	9.49207e-06	0.0108106	0.376852	0.0860538	0.00645361	0.153908	0.605489	0.000579386	0.0500588	0.998622	0.632924	0.368012	0.635732	0.297848	0.0010421	0.98899	0.999932	0.0569398	1	0.0433161	0.179153	0.19454	0.545573	0.569936	0.999441	0.229926	3.45964e-06	0.485123	0.668435	0.00146759	0.822485	0.101501	0.741388	0.0139538
Dnajc17	0.573222	0.32352	0.79317	0.872365	0.0553082	0.54677	0.889972	0.948409	0.864227	0.93106	0.997582	0.953233	0.997331	0.984739	0.0275073	0.342476	0.265432	0.375625	0.275887	0.679144	0.687119	0.364383	0.740574	0.454307	0.998622	0.782948	0.978364	0.91837	0.358232	0.332234	0.999188	0.999932	0.863455	1	0.278014	0.263829	0.249061	0.744347	0.661771	0.999441	0.0631047	0.873508	0.839819	0.473588	0.995606	0.956265	0.189658	0.764055	0.347104
1700025G04Rik	0.0302671	0.0243234	0.101549	0.424737	0.679724	0.82203	0.710533	0.862875	0.342789	0.456945	0.997582	0.977609	0.997331	0.951628	0.515834	0.0158432	3.7455e-06	0.52667	0.00153465	0.0399474	0.325132	0.786997	0.177293	9.61958e-05	0.998622	0.243801	0.793735	0.774437	0.325855	0.236608	0.791453	0.999932	0.8556	1	0.0763402	0.894993	0.962135	0.609699	0.973202	0.999441	0.00403063	0.00805267	0.168276	0.31886	0.348677	0.659062	0.439399	0.780565	0.719861
Fam229b	0.35664	0.347926	0.31997	0.380132	0.382131	0.372613	0.362628	0.922239	0.872291	0.678332	0.997582	0.953233	0.997331	0.901424	0.300707	0.272413	0.20036	0.412611	0.459561	0.478319	0.355329	0.664155	0.700367	0.378743	0.998622	0.847548	0.958268	0.784796	0.741887	0.753651	0.840746	0.999932	0.986696	1	0.112425	0.0183633	0.997802	0.636586	0.186733	0.999441	0.382692	0.395502	0.396184	0.735608	0.990195	0.796653	0.713662	0.919073	0.353244
Dennd6b	0.341712	0.740522	0.970374	0.568049	0.682992	0.716551	0.661177	0.922239	0.971497	0.987177	0.997582	0.977609	0.997331	0.940065	0.059304	0.892255	0.232445	0.864794	0.70102	0.305683	0.941237	0.461281	0.98604	0.416585	0.998622	0.933646	0.955487	0.987167	0.633073	0.992354	0.428497	0.999932	0.999594	1	0.0226751	0.192798	0.78005	0.486044	0.586799	0.999441	0.410384	0.650772	0.956414	0.755677	0.995606	0.988543	0.823669	0.947306	0.84502
Rsph9	0.498429	0.345838	0.000916777	0.930863	0.235491	0.245701	0.577902	0.947805	0.871791	0.0363616	0.997582	0.953233	0.997331	0.928578	0.0194955	0.201446	0.549681	0.683117	0.225765	0.094725	0.211156	0.333803	0.6291	0.706631	0.998622	0.754197	0.899663	0.692404	0.753162	0.257797	0.730731	0.999932	0.858964	1	0.271739	0.0099843	0.111721	0.744347	0.129936	0.999441	0.0507704	0.684394	0.595631	0.457204	0.995606	0.876091	0.0982507	0.741388	0.0270751
Capsl	0.485751	2.73e-05	0.110463	0.81061	0.835993	0.0919462	0.994373	0.947805	0.00184156	0.469843	0.997582	0.99178	0.997331	0.999369	0.539353	0.000123822	0.202975	0.598453	0.733146	0.188802	0.803216	0.794817	0.00503865	0.381745	0.998622	0.947114	0.955487	0.952441	0.636206	9.80239e-05	0.842657	0.999932	0.0107657	1	0.718745	0.000791447	0.580525	0.928603	0.02553	0.999441	0.610688	0.0699546	0.867283	0.838887	0.896057	0.964793	NA	NA	0.231146
Sh3d21	0.113791	0.61555	0.429371	0.771708	0.279993	0.550099	0.683242	0.922239	0.93807	0.734788	0.997582	0.953233	0.997331	0.944481	0.238441	0.880143	0.000321058	0.373625	0.103958	0.950244	0.554232	0.625236	0.982478	0.00333107	0.998622	0.656021	0.997642	0.871632	0.619089	0.385132	0.540019	0.999932	0.87909	1	0.674076	0.730792	0.176388	0.904802	0.920939	0.999441	0.123329	0.905195	0.941247	0.561491	0.995606	0.985526	0.406544	0.772425	0.647278
1700029I15Rik	0.747114	0.140126	0.727443	0.0735893	0.0331138	0.273978	0.619133	0.980265	0.725743	0.899676	0.997582	0.953233	0.997331	0.93377	0.571096	0.0268193	0.0517803	0.884838	0.147321	0.816512	0.0547196	0.809191	0.240196	0.153399	0.998622	0.698686	0.985518	0.471894	0.254304	0.843499	0.381465	0.999932	0.987566	1	0.523979	0.285405	0.260861	0.837584	0.675705	0.999441	0.0352985	0.0477321	0.0638754	0.432389	0.80231	0.538382	0.553351	0.858545	0.245159
1700029J07Rik	0.168017	0.0293291	0.159886	0.502578	0.501532	0.17519	0.382486	0.922239	0.380392	0.548114	0.997582	0.965552	0.997331	0.901424	0.210398	0.955308	0.110433	0.721435	0.46302	0.452871	0.255745	0.604815	0.999044	0.258419	0.998622	0.847924	0.955487	0.734934	0.473753	0.0104148	0.901819	0.999932	0.254229	1	0.62648	0.592882	0.591431	0.880454	0.845174	0.999441	0.236213	0.61091	0.330724	0.676094	0.995606	0.773488	0.0892248	0.741388	0.582322
Ndufb11b	0.458824	0.965246	0.9736	0.738735	0.738212	0.82744	0.436972	0.94577	0.995277	0.98896	0.997582	0.979323	0.997331	0.901424	0.549478	0.646653	0.0657178	0.420935	0.996521	0.574024	0.531158	0.799635	0.888678	0.181105	0.998622	0.998966	0.968564	0.860009	0.499422	0.882885	0.797344	0.999932	0.987566	1	0.605202	0.510266	0.870534	0.870024	0.807556	0.999441	0.752111	0.859663	0.349045	0.919653	0.995606	0.783128	0.318818	0.772425	0.834833
1700030K09Rik	0.0488465	0.0802212	0.00517883	0.171124	0.930129	0.332353	0.171775	0.922239	0.597242	0.101843	0.997582	0.999856	0.997331	0.901424	0.98506	0.000676212	0.00795125	0.715652	0.0623206	0.965163	0.0100307	0.994999	0.0190883	0.039841	0.998622	0.608905	0.998116	0.285636	0.247003	0.615176	0.959908	0.999932	0.946688	1	0.202432	0.0557462	0.221467	0.704462	0.339647	0.999441	0.0357305	0.00661907	0.00647762	0.432389	0.307739	0.386631	0.0234715	0.620676	0.560099
Timm21	0.984787	0.540082	0.112993	0.754224	0.336826	0.414246	0.652106	0.998679	0.928595	0.472927	0.997582	0.953233	0.997331	0.940065	0.121255	0.468212	0.0841273	0.35373	0.510854	0.66355	0.91654	0.535739	0.811099	0.214949	0.998622	0.865698	0.976925	0.979139	0.525174	0.307757	0.938476	0.999932	0.858964	1	0.125479	0.395174	0.411991	0.652383	0.737769	0.999441	0.508858	0.893149	0.589048	0.794754	0.995606	0.873945	0.619046	0.901589	0.883659
1700037H04Rik	0.722804	0.00505206	4.2e-07	0.610355	0.620061	0.960926	0.484556	0.978202	0.127667	0.000151694	0.997582	0.976655	0.997331	0.910055	0.876822	0.00228949	9.91038e-13	0.371622	0.432356	0.898557	0.289486	0.960996	0.0482537	3.88157e-10	0.998622	0.84384	0.995417	0.760637	0.963691	0.0783941	0.454304	0.999932	0.639659	1	0.879382	0.109415	0.286791	0.978544	0.468365	0.999441	0.555064	0.034835	0.81598	0.803974	0.69127	0.948997	0.00303436	0.388232	0.00858908
Pradc1	0.551305	0.769698	0.325926	0.89374	0.26736	0.779838	0.436975	0.947805	0.978525	0.680796	0.997582	0.953233	0.997331	0.901424	0.199045	0.484414	0.000418626	0.109442	0.175694	0.218868	0.763996	0.593035	0.819411	0.00406938	0.998622	0.720114	0.955487	0.941381	0.76837	0.978135	0.714499	0.999932	0.996076	1	0.895295	0.15882	0.122011	0.980711	0.542448	0.999441	0.133298	0.653661	0.402158	0.572428	0.995606	0.798369	0.693651	0.912379	0.565758
Rpgrip1l	0.932788	0.45608	0.586736	0.243456	0.353341	0.686082	0.985075	0.995432	0.90969	0.822165	0.997582	0.953233	0.997331	0.997467	0.359432	0.958125	0.364981	0.306918	0.944802	0.822506	0.929847	0.686711	0.999044	0.544662	0.998622	0.995166	0.986443	0.981627	0.44393	0.417228	0.387857	0.999932	0.896252	1	0.51029	0.885116	0.489943	0.834944	0.972468	0.999441	0.534144	0.88003	0.452584	0.797044	0.995606	0.808759	0.683621	0.912379	0.994942
Fam177a	0.669591	0.312417	0.000443827	0.102367	0.246343	0.763461	0.460452	0.96843	0.860015	0.0226738	0.997582	0.953233	0.997331	0.90625	0.876435	0.572095	0.0784611	0.0703402	0.492348	0.858186	0.681193	0.960757	0.853874	0.205413	0.998622	0.85953	0.991497	0.916446	0.246066	0.272316	0.423552	0.999932	0.858964	1	0.808338	0.769869	0.253099	0.965114	0.93905	0.999441	0.664342	0.659104	0.149109	0.871924	0.995606	0.638946	0.0472202	0.741388	0.0396268
Phospho2	0.252067	0.403116	0.621498	0.180666	0.68029	0.26158	0.981136	0.922239	0.88657	0.839708	0.997582	0.977609	0.997331	0.99672	0.554689	0.796434	0.417153	0.620522	0.325571	0.515073	0.426807	0.801426	0.944724	0.58966	0.998622	0.806545	0.964094	0.812003	0.629242	0.266283	0.440358	0.999932	0.858964	1	0.868764	0.581628	0.912386	0.977471	0.840246	0.999441	0.112541	0.6839	0.150959	0.542318	0.995606	0.640322	0.787664	0.942998	0.538913
Rffl	0.463188	0.430452	0.655772	0.0471994	0.518252	0.451735	0.778739	0.94577	0.899367	0.85889	0.997582	0.968789	0.997331	0.962291	0.12222	0.936208	0.93926	0.888729	0.901471	0.0800281	0.0638865	0.536114	0.99837	0.969905	0.998622	0.988132	0.888151	0.495865	0.903365	0.924615	0.152969	0.999932	0.988291	1	0.292707	0.260691	0.252255	0.744347	0.660058	0.999441	0.264516	0.188165	0.151191	0.683197	0.990195	0.640483	0.430493	0.774178	0.532661
Armt1	0.111714	0.932859	0.22568	0.494382	0.838523	0.302741	0.944133	0.922239	0.992776	0.60785	0.997582	0.992434	0.997331	0.992578	0.100988	0.510414	0.695738	0.948923	0.808258	0.104778	0.482302	0.519588	0.832451	0.818003	0.998895	0.964533	0.904506	0.839097	0.148598	0.384336	0.601439	0.999932	0.87909	1	0.104227	0.0493711	0.584779	0.631727	0.325643	0.999441	0.402607	0.549862	0.645362	0.751022	0.995606	0.895551	0.157187	0.764055	0.979489
Msl3l2	0.206854	0.861369	0.985842	0.657457	0.299339	0.917783	0.258916	0.922239	0.989474	0.994172	0.997582	0.953233	0.997331	0.901424	0.0648481	0.92206	0.110759	0.268905	0.522512	0.976775	0.850593	0.468957	0.994331	0.258925	0.998622	0.87039	0.998638	0.966489	0.829079	0.808865	0.29114	0.999932	0.987566	1	0.343001	0.967594	0.331925	0.755376	0.990454	0.999441	0.114554	0.93207	0.593492	0.545815	0.995606	0.87509	0.354088	0.772425	0.98658
Hectd3	0.0978315	0.286909	0.00604522	0.655729	0.202905	0.689964	0.697567	0.922239	0.849884	0.112972	0.997582	0.953233	0.997331	0.948877	0.07963	0.0125775	0.00521384	0.439776	0.39493	0.373015	0.901011	0.48923	0.153023	0.029	0.998622	0.830883	0.955487	0.978032	0.748075	0.635504	0.95363	0.999932	0.951155	1	0.610322	0.0270934	0.658617	0.872477	0.234901	0.999441	0.0615471	0.381298	0.590809	0.472424	0.990195	0.874073	0.338479	0.772425	0.381453
Zfp763	0.771805	0.770731	0.290254	0.926058	0.216543	0.903516	0.673204	0.9852	0.978525	0.658553	0.997582	0.953233	0.997331	0.942277	0.0318335	0.374514	0.119555	0.980497	0.64958	0.532158	0.78388	0.38434	0.758704	0.272506	0.999529	0.913757	0.965098	0.94601	0.582154	0.755386	0.749997	0.999932	0.986696	1	0.0884237	0.335991	0.901509	0.619904	0.705152	0.999441	0.199259	0.842007	0.774103	0.638458	0.995606	0.929431	0.858267	0.956884	0.943353
1700071K01Rik	0.195523	0.471858	0.0262281	0.451795	0.805215	0.657445	0.625166	0.922239	0.9143	0.24629	0.997582	0.986063	0.997331	0.93465	0.468056	0.0466329	0.00117486	0.024975	0.505775	0.485086	0.458203	0.758159	0.317415	0.00928823	0.998622	0.863691	0.959141	0.828142	0.547349	0.854017	0.85616	0.999932	0.987566	1	0.84504	0.0932826	0.0782347	0.975582	0.438102	0.999441	0.11419	0.244307	0.207133	0.544927	0.990195	0.692375	0.193015	0.764055	0.141114
Efcab2	0.732298	0.758421	0.73806	0.504945	0.0468759	0.110846	0.145	0.979206	0.974195	0.90547	0.997582	0.953233	0.997331	0.901424	0.168707	0.239985	0.0324172	0.59515	0.151477	0.805414	0.0670518	0.580188	0.677435	0.111172	0.998622	0.703503	0.985168	0.50423	0.276902	0.252438	0.604369	0.999932	0.858964	1	0.912163	0.360825	0.329275	0.983067	0.717997	0.999441	0.0801022	0.262379	0.124583	0.507862	0.990195	0.628948	0.00963134	0.486037	0.582856
1700088E04Rik	0.344091	9.72e-05	0.132616	0.474064	0.504662	0.451831	0.988016	0.922239	0.00543787	0.505054	0.997582	0.966195	0.997331	0.997912	0.32763	0.000583526	2.3226e-05	0.534339	0.172159	0.000440066	0.612918	0.673457	0.0169819	0.000406564	0.998622	0.719312	0.098491	0.894727	0.682418	0.0137771	0.608065	0.999932	0.292463	1	0.438299	0.665542	0.925976	0.809963	0.887642	0.999441	0.35535	0.00255503	0.641558	0.728356	0.177085	0.893313	0.193023	0.764055	0.346624
Rab31	0.132978	0.950061	0.277617	0.540247	0.258918	0.916727	0.738893	0.922239	0.993072	0.649431	0.997582	0.953233	0.997331	0.95528	0.0698035	0.710139	0.000743418	0.74259	0.217733	0.802595	0.5221	0.477398	0.912301	0.00641113	0.998622	0.751907	0.985168	0.854496	0.779287	0.889498	0.56775	0.999932	0.987566	1	0.630241	0.716525	0.501237	0.881853	0.914483	0.999441	0.0308817	0.981475	0.834231	0.432389	0.997528	0.95451	0.432362	0.775246	0.346687
Stambpl1	0.832934	0.603013	0.0569886	0.994909	0.518719	0.900342	0.535544	0.990768	0.937056	0.356635	0.999747	0.968789	0.997331	0.920482	0.531486	0.282354	0.414044	0.865507	0.69606	0.861711	0.50615	0.792914	0.708597	0.586588	0.998622	0.932699	0.991631	0.849974	0.769931	0.803446	0.697706	0.999932	0.987566	1	0.906669	0.330512	0.678813	0.982024	0.701805	0.999441	0.49036	0.643842	0.618817	0.794754	0.995606	0.882426	0.0732006	0.741388	0.325307
Ptges3l	0.919377	0.230363	0.693845	0.344002	0.226491	0.864239	0.764248	0.995022	0.811658	0.880181	0.997582	0.953233	0.997331	0.960183	0.335719	0.0812987	0.505368	0.954779	0.0916346	0.519799	0.00827336	0.67617	0.4267	0.670874	0.998895	0.64159	0.964338	0.274874	0.474006	0.482803	0.703437	0.999932	0.927229	1	0.556273	0.488792	0.0910193	0.846464	0.798173	0.999441	0.0448877	0.116304	0.0422431	0.442018	0.990195	0.485478	0.862868	0.956884	0.594444
Wdr38	0.244448	0.503629	0.601181	0.59088	0.692894	0.82572	0.918343	0.922239	0.92107	0.828771	0.997582	0.977609	0.997331	0.987385	0.346976	0.145591	0.111982	0.616784	0.454768	0.81637	0.76452	0.680487	0.55807	0.260809	0.998622	0.846763	0.985518	0.941381	0.57517	0.740885	0.742081	0.999932	0.983285	1	0.953897	0.164047	0.874777	0.988676	0.549711	0.999441	0.286989	0.570011	0.672666	0.691408	0.995606	0.907056	0.897809	0.959325	0.998494
1700123O20Rik	0.318861	0.307279	0.0198541	0.164611	0.860705	0.182446	0.0526339	0.922239	0.857028	0.210167	0.997582	0.992504	0.997331	0.901424	0.562693	0.327768	0.87309	0.48417	0.330404	0.577577	0.0038914	0.805531	0.729478	0.9324	0.998622	0.809244	0.968564	0.239344	0.572495	0.123249	0.759006	0.999932	0.726204	1	0.882622	0.193581	0.0937755	0.979266	0.587116	0.999441	0.391454	0.769696	0.0253596	0.741961	0.995606	0.439922	0.304625	0.772425	0.27898
Hcfc2	0.867915	0.852796	0.186458	0.778554	0.958291	0.95685	0.141221	0.993268	0.987825	0.575795	0.997582	0.999856	0.997331	0.901424	0.505512	0.712617	0.00307514	0.0469386	0.454839	0.513977	0.494732	0.780948	0.913362	0.0194394	0.998622	0.846763	0.964094	0.844242	0.887419	0.883857	0.297619	0.999932	0.987566	1	0.464548	0.429371	0.0955427	0.823619	0.759871	0.999441	0.937735	0.9224	0.270941	0.971333	0.995606	0.742088	0.193014	0.764055	0.999476
Pno1	0.193225	0.698144	0.0216869	0.883206	0.620069	0.469812	0.425372	0.922239	0.958737	0.221824	0.997582	0.976655	0.997331	0.901424	0.556261	0.444921	0.032378	0.378842	0.124317	0.357514	0.641279	0.802956	0.801082	0.111078	0.998622	0.6881	0.955487	0.905016	0.60168	0.836518	0.707454	0.999932	0.987566	1	0.469662	0.765055	0.797577	0.825044	0.938125	0.999441	0.124657	0.347442	0.396692	0.562304	0.990195	0.796653	0.281339	0.772425	0.232523
Paxbp1	0.0675274	0.36196	0.558009	0.339613	0.676822	0.46603	0.455137	0.922239	0.873319	0.809083	0.997582	0.977609	0.997331	0.904834	0.254749	0.246905	0.30505	0.177943	0.136359	0.131122	0.114793	0.639215	0.681631	0.493285	0.998622	0.695259	0.943698	0.585804	0.153401	0.890213	0.863855	0.999932	0.987566	1	0.588973	0.674477	0.932588	0.863202	0.893002	0.999441	0.259864	0.180056	0.154298	0.680944	0.990195	0.642988	0.0646703	0.741388	0.0564051
Oscp1	0.182667	0.625937	4.3e-05	0.994419	0.536708	0.89762	0.806892	0.922239	0.939925	0.00518486	0.999737	0.970282	0.997331	0.967851	0.98337	0.962078	0.00341135	0.496638	0.444557	0.548218	0.349405	0.994653	0.999044	0.0209861	0.998622	0.846089	0.965536	0.780886	0.114001	0.709791	0.848473	0.999932	0.973528	1	0.512422	0.618643	0.142872	0.834944	0.859017	0.999441	0.679277	0.695893	0.881071	0.882413	0.995606	0.967868	0.198199	0.764055	0.0297039
Pigyl	0.945489	0.65823	0.379221	0.0649098	0.492194	0.671814	0.148025	0.995432	0.946643	0.704278	0.997582	0.965358	0.997331	0.901424	0.44934	0.244336	0.889234	0.194282	0.96665	0.790794	0.0716982	0.745614	0.681631	0.941539	0.998622	0.998069	0.984659	0.515384	0.635313	0.952103	0.66479	0.999932	0.990784	1	0.553573	0.274517	0.74838	0.846464	0.669964	0.999441	0.635654	0.565134	0.0548916	0.856042	0.995606	0.527903	0.435947	0.778214	0.35605
Fam207a	0.0421671	0.627903	0.775679	0.423394	0.078008	0.676711	0.18417	0.91496	0.940793	0.922259	0.997582	0.953233	0.997331	0.901424	0.151207	0.291716	0.315511	0.1184	0.00076743	0.525373	0.279286	0.564937	0.71462	0.502935	0.998622	0.213207	0.964338	0.75395	0.81735	0.644936	0.794452	0.999932	0.954805	1	0.159268	0.416911	0.544379	0.667951	0.74975	0.999441	0.00225614	0.953223	0.0539575	0.305832	0.996237	0.526117	0.666139	0.912379	0.20678
Chac1	0.122681	0.470467	0.652344	0.434098	0.220355	0.96396	0.0533234	0.922239	0.9143	0.856788	0.997582	0.953233	0.997331	0.901424	0.224424	0.275306	0.085073	0.416673	0.0453887	0.904949	0.0236049	0.616299	0.703349	0.216541	0.998622	0.571843	0.996121	0.365989	0.810352	0.700575	0.494203	0.999932	0.970225	1	0.564788	0.445847	0.370077	0.848409	0.771914	0.999441	0.0320172	0.576536	0.0322368	0.432389	0.995606	0.468604	0.556454	0.860761	0.294739
Tmem160	0.716147	0.530129	0.0781369	0.0777754	0.942164	0.871325	0.370925	0.97731	0.925446	0.407822	0.997582	0.999856	0.997331	0.901424	0.837949	0.352255	0.0210546	0.0507534	0.847311	0.556037	0.457542	0.946494	0.74745	0.0811453	0.998622	0.974367	0.965957	0.828107	0.826146	0.595309	0.500903	0.999932	0.939657	1	0.990861	0.265228	0.363763	0.997048	0.663161	0.999441	0.759001	0.725154	0.0632719	0.923208	0.995606	0.538382	0.546482	0.853599	0.180237
1810009A15Rik	0.632787	0.0615255	0.453856	0.866867	0.435262	0.556339	0.79373	0.956764	0.532051	0.752314	0.997582	0.955323	0.997331	0.963686	0.0322122	0.00404099	0.00797268	0.0702754	0.864541	0.18524	0.0743385	0.384893	0.073198	0.0399058	0.998622	0.979697	0.955487	0.518024	0.927542	0.131878	0.798094	0.999932	0.73661	1	0.0547769	0.00539744	0.0212809	0.578943	0.089919	0.999441	0.302469	0.24672	0.920425	0.702393	0.990195	0.980127	0.500895	0.822785	0.424283
Calcoco1	0.00653399	0.93988	0.0726348	0.880075	0.0567461	0.525447	0.978806	0.691958	0.993072	0.397103	0.997582	0.953233	0.997331	0.99669	0.0110393	0.211539	3.35727e-05	0.586952	0.0303097	0.965801	0.586995	0.30591	0.643309	0.00054884	0.998622	0.505416	0.998116	0.885682	0.42319	0.615679	0.915082	0.999932	0.946688	1	0.717812	0.528208	0.46956	0.928406	0.814981	0.999441	0.00640946	0.688485	0.913138	0.33339	0.995606	0.978024	0.745289	0.931362	0.72355
Cgrrf1	0.42665	0.57921	0.916708	0.782445	0.422164	0.721115	0.334296	0.931763	0.93261	0.972726	0.997582	0.955323	0.997331	0.901424	0.83281	0.74236	0.133052	0.20875	0.0723365	0.410029	0.805657	0.945411	0.923969	0.291469	0.998622	0.627513	0.955487	0.95284	0.996383	0.915391	0.694313	0.999932	0.987566	1	0.298178	0.675779	0.409165	0.744474	0.89314	0.999441	0.163001	0.451032	0.268755	0.602265	0.990195	0.742088	0.794359	0.942998	0.38911
Ece2	0.169631	0.0238628	0.0510046	0.409274	0.369262	0.00753898	0.617754	0.922239	0.340503	0.341314	0.997582	0.953233	0.997331	0.933149	0.0435034	0.471526	0.00026214	0.370358	0.508542	0.682642	0.359954	0.432224	0.81238	0.00282582	0.998622	0.864465	0.979422	0.787915	0.702124	0.0105085	0.824463	0.999932	0.254796	1	0.420706	0.985364	0.999688	0.797795	0.9965	1	0.0096814	0.41069	0.0806355	0.359551	0.990195	0.570141	0.257284	0.772425	0.314049
Tmem176b	0.907555	0.834408	0.0807383	0.85534	0.919172	0.820942	0.583577	0.993268	0.985535	0.414687	0.997582	0.999856	0.997331	0.928578	0.388826	0.113293	0.00144583	0.931746	0.433123	0.157358	0.797052	0.704775	0.499744	0.0108466	0.998622	0.84384	0.946526	0.949954	0.991033	0.772813	0.619685	0.999932	0.987566	1	0.31657	0.0587945	0.93429	0.745113	0.348586	0.999441	0.867763	0.975689	0.781066	0.955996	0.997528	0.931034	0.740567	0.928817	0.111431
1810009N02Rik	0.147524	0.989248	0.764714	0.199262	0.309109	0.49847	0.735141	0.922239	0.997825	0.916292	0.997582	0.953233	0.997331	0.955125	0.700161	0.178294	0.527012	0.630778	0.411944	0.397369	0.373491	0.883738	0.598987	0.688904	0.998622	0.836706	0.955487	0.792424	0.0487586	0.544749	0.392451	0.999932	0.933345	1	0.470255	0.120073	0.776113	0.825044	0.490335	0.999441	0.811679	0.686509	0.342444	0.941083	0.995606	0.780592	0.940884	0.97449	0.254697
Ccnq	0.532453	0.198038	0.79247	0.484468	0.174086	0.129761	0.891745	0.947805	0.791447	0.930686	0.997582	0.953233	0.997331	0.984739	0.140617	0.953953	0.111779	0.826036	0.0874141	0.770142	0.604506	0.551747	0.999044	0.260532	0.998622	0.632924	0.983221	0.892471	0.603979	0.0783622	0.546717	0.999932	0.639659	1	0.36057	0.45762	0.239634	0.759303	0.780079	0.999441	0.141081	0.761053	0.6779	0.58474	0.995606	0.907085	0.199617	0.764055	0.513589
Ccdc28b	0.399681	0.415215	0.750993	0.722586	0.654494	0.343929	0.244776	0.923029	0.891509	0.911749	0.997582	0.977609	0.997331	0.901424	0.308562	0.41635	0.00302604	0.901963	0.671838	0.681446	0.112608	0.66909	0.781811	0.0191935	0.998622	0.923954	0.979322	0.58128	0.79092	0.236355	0.587039	0.999932	0.8556	1	0.619222	0.448405	0.24449	0.878078	0.773777	0.999441	0.352465	0.871145	0.286195	0.728302	0.995606	0.751147	0.181995	0.764055	0.526993
Tcim	0.238971	0.642233	0.141941	0.515383	0.513461	0.255022	0.119092	0.922239	0.944854	0.524122	0.997582	0.968789	0.997331	0.901424	0.255235	0.893074	0.0477931	0.969082	0.499947	0.121747	0.0331999	0.639215	0.986066	0.145202	0.998895	0.861541	0.92666	0.402633	0.560322	0.595639	0.442173	0.999932	0.94002	1	0.612048	0.175724	0.0583933	0.873584	0.567193	0.999441	0.313527	0.346498	0.202641	0.710847	0.990195	0.690002	0.423109	0.772935	0.783209
Slc25a35	0.244125	0.800435	0.00137759	0.462523	0.423751	0.66302	0.395585	0.922239	0.981491	0.0480741	0.997582	0.955323	0.997331	0.901424	0.283294	0.718048	0.000682668	0.928336	0.274247	0.409301	0.121092	0.653969	0.914758	0.00596937	0.998622	0.781014	0.955487	0.593608	0.732252	0.951837	0.973026	0.999932	0.990627	1	0.968637	0.50507	0.261994	0.991251	0.80577	0.999441	0.176744	0.578463	0.281379	0.619646	0.995606	0.747939	0.285012	0.772425	0.140531
Atg2a	0.432358	0.820169	0.331569	0.942932	0.890596	0.262259	0.0144634	0.933004	0.985454	0.683445	0.997582	0.998041	0.997331	0.901424	0.264524	0.823663	0.375702	0.150865	0.989452	0.412776	0.155015	0.643178	0.957569	0.552899	0.998622	0.99885	0.955487	0.636584	0.653815	0.391314	0.110199	0.999932	0.880561	1	0.385071	0.664551	0.941195	0.769189	0.887227	0.999441	0.487284	0.466224	0.0591442	0.794754	0.990195	0.535541	0.0814532	0.741388	0.285172
Fuom	0.432851	0.847153	0.0819042	0.306318	0.0233615	0.31075	0.72809	0.933609	0.986756	0.417572	0.997582	0.953233	0.997331	0.953079	0.211069	0.487122	0.00121622	0.726927	0.0494507	0.596774	0.390815	0.605205	0.820159	0.00951914	0.998622	0.586175	0.968564	0.797521	0.271038	0.306106	0.285865	0.999932	0.858964	1	0.543581	0.834114	0.381883	0.845601	0.961461	0.999441	0.0574077	0.636986	0.678712	0.466947	0.995606	0.907085	0.85173	0.956884	0.680913
Tmem97	0.545005	0.230143	0.342553	0.212894	0.0738345	0.0976362	0.735665	0.947805	0.811526	0.687971	0.997582	0.953233	0.997331	0.95528	0.0322321	0.771837	0.453525	0.873004	0.0315597	0.227869	0.131312	0.384893	0.934185	0.623828	0.998622	0.505416	0.955487	0.611623	0.489794	0.131109	0.347106	0.999932	0.735723	1	0.946232	0.331327	0.254669	0.987068	0.702479	0.999441	0.0131132	0.456891	0.323239	0.377579	0.990195	0.768901	0.199014	0.764055	0.376873
Ydjc	0.982848	0.518797	0.524183	0.868243	0.403667	0.724759	0.216807	0.998679	0.922022	0.793765	0.997582	0.955323	0.997331	0.901424	0.326022	0.41979	0.0140544	0.231089	0.978088	0.752876	0.748526	0.673097	0.784442	0.0606851	0.998622	0.998173	0.981634	0.934943	0.536675	0.501855	0.331198	0.999932	0.931186	1	0.291752	0.2184	0.241594	0.744347	0.618284	0.999441	0.546266	0.883505	0.442587	0.799612	0.995606	0.808759	0.12651	0.741388	0.992176
Retreg1	0.062906	0.973673	0.351871	0.828832	0.747295	0.758365	0.0841922	0.922239	0.995984	0.693834	0.997582	0.979323	0.997331	0.901424	0.0169053	0.0689246	0.368314	0.814755	0.695995	0.0313557	0.0618138	0.328325	0.391239	0.547548	0.998622	0.932699	0.761789	0.489592	0.337547	0.887804	0.269382	0.999932	0.987566	1	0.179221	0.0115077	0.291156	0.687625	0.141157	0.999441	0.0448441	0.710416	0.122358	0.442018	0.995606	0.624486	0.332524	0.772425	0.777563
Triap1	0.177674	0.745629	0.172391	0.777379	0.888163	0.100194	0.813669	0.922239	0.971615	0.565637	0.997582	0.998041	0.997331	0.969636	0.687262	0.903304	0.831961	0.825079	0.557089	0.13749	0.794216	0.878064	0.989439	0.906702	0.998622	0.885014	0.946526	0.948903	0.193762	0.2715	0.969159	0.999932	0.858964	1	0.91273	0.3757	0.951502	0.983067	0.727287	0.999441	0.492192	0.236609	0.767879	0.794754	0.990195	0.927734	0.0800534	0.741388	0.828071
Trappc2l	0.292654	0.659773	0.150303	0.697182	0.298673	0.436508	0.510116	0.922239	0.947284	0.536387	0.997582	0.953233	0.997331	0.913951	0.120499	0.16849	0.00322463	0.999448	0.450743	0.806807	0.227458	0.53551	0.585945	0.0201673	0.999946	0.846435	0.985168	0.70245	0.973847	0.803119	0.873221	0.999932	0.987566	1	0.549402	0.474115	0.344709	0.846464	0.788179	0.999441	0.134577	0.404066	0.445525	0.573541	0.990195	0.808759	0.715678	0.919073	0.875054
Alkbh3	0.370785	0.816762	0.297631	0.317973	0.288484	0.335381	0.165641	0.922239	0.985454	0.66334	0.997582	0.953233	0.997331	0.901424	0.541489	0.8922	0.00379545	0.121461	0.643219	0.45497	0.305717	0.795826	0.98604	0.0227824	0.998622	0.911749	0.9557	0.765498	0.219582	0.431121	0.839768	0.999932	0.905234	1	0.509281	0.636262	0.644809	0.834944	0.869067	0.999441	0.859461	0.581449	0.0711724	0.953783	0.995606	0.554797	0.879228	0.956884	0.872165
Aamdc	0.809612	0.453017	0.229399	0.499459	0.531778	0.198968	0.949524	0.987845	0.908678	0.61004	0.997582	0.969108	0.997331	0.992642	0.554082	0.842415	0.416776	0.47961	0.336045	0.0612432	0.986185	0.801334	0.966949	0.589393	0.998622	0.809244	0.844115	0.996792	0.588373	0.757418	0.643549	0.999932	0.986918	1	0.329815	0.300359	0.667914	0.753353	0.683562	0.999441	0.66715	0.0802775	0.585379	0.874045	0.932042	0.871362	0.426779	0.773307	0.714844
Tmem218	0.851628	0.415145	0.196156	0.271135	0.904291	0.131579	0.449482	0.992312	0.891509	0.582947	0.997582	0.998933	0.997331	0.902959	0.659987	0.212155	0.106083	0.647241	0.760147	0.680671	0.916918	0.860813	0.644304	0.251941	0.998622	0.951437	0.979233	0.979139	0.93672	0.131039	0.21157	0.999932	0.735723	1	0.669016	0.171043	0.649095	0.902265	0.561601	0.999441	0.843221	0.569888	0.824402	0.948777	0.995606	0.951561	0.0750546	0.741388	0.58184
Eci3	0.351734	0.0750546	5.88e-05	0.576363	0.569525	0.223257	0.320501	0.922239	0.583563	0.00607266	0.997582	0.972646	0.997331	0.901424	0.530023	0.00345437	1.32618e-07	0.920453	0.458917	0.538539	0.102868	0.792211	0.065998	5.85261e-06	0.998622	0.847548	0.965098	0.57126	0.795678	0.605572	0.753229	0.999932	0.94287	1	0.739775	0.0670998	0.15417	0.938553	0.374166	0.999441	0.312003	0.0805468	0.343544	0.710369	0.932042	0.781389	0.022457	0.608964	0.343585
Timm29	0.864537	0.860387	0.0342335	0.832064	0.689454	0.838677	0.874413	0.993268	0.989254	0.281311	0.997582	0.977609	0.997331	0.982995	0.882667	0.630751	0.435348	0.690798	0.522791	0.99507	0.771941	0.96185	0.881011	0.608155	0.998622	0.870429	0.999497	0.943184	0.88446	0.975514	0.80562	0.999932	0.995483	1	0.577281	0.808177	0.669956	0.856584	0.956	0.999441	0.656441	0.796072	0.97691	0.866606	0.995606	0.991794	0.272612	0.772425	0.520776
Tmem256	0.0816112	0.403547	0.996883	0.752577	0.0938525	0.403002	0.453649	0.922239	0.88657	0.999257	0.997582	0.953233	0.997331	0.903789	0.0846911	0.181011	0.00120604	0.364254	0.101549	0.293107	0.926442	0.49756	0.601877	0.00944735	0.998622	0.651955	0.955487	0.980459	0.896598	0.11178	0.852904	0.999932	0.70622	1	0.711329	0.0493189	0.333334	0.926226	0.325643	0.999441	0.0988198	0.985703	0.529045	0.526208	0.997528	0.845568	0.343999	0.772425	0.369766
Tma16	0.315995	0.83758	0.691886	0.425485	0.0505082	0.753908	0.564165	0.922239	0.985535	0.878882	0.997582	0.953233	0.997331	0.925886	0.199397	0.468439	0.28492	0.229365	0.0328776	0.98584	0.0137127	0.593518	0.811099	0.47464	0.998622	0.508043	0.999209	0.319849	0.556268	0.881493	0.851634	0.999932	0.987566	1	0.472381	0.698873	0.0160174	0.826141	0.908146	0.999441	0.0263538	0.743179	0.276778	0.424825	0.995606	0.744691	0.806158	0.942998	0.256447
Sec11c	0.972873	0.815307	0.790037	0.980463	0.707955	0.162571	0.789591	0.99773	0.985075	0.929223	0.997582	0.977609	0.997331	0.962985	0.672233	0.246884	0.83125	0.605534	0.464787	0.363733	0.810422	0.867993	0.681631	0.906362	0.998622	0.848501	0.955487	0.953456	0.786384	0.451992	0.845059	0.999932	0.920638	1	0.341334	0.851624	0.532835	0.754806	0.965921	0.999441	0.779525	0.216352	0.855271	0.93186	0.990195	0.963049	0.493542	0.815885	0.166928
Smim8	0.795802	0.684736	0.0170093	0.912343	0.785621	0.910508	0.484875	0.987845	0.953556	0.193607	0.997582	0.983577	0.997331	0.910108	0.0315714	0.669538	0.0647032	0.327013	0.112455	0.276967	0.993046	0.3824	0.898756	0.179035	0.998622	0.668236	0.955487	0.997716	0.982479	0.829156	0.717329	0.999932	0.987566	1	0.00950234	0.228845	0.385363	0.43824	0.630623	0.999441	0.683557	0.671359	0.512491	0.884669	0.995606	0.836437	0.566791	0.869124	0.232096
Smap2	0.560744	0.852304	0.236711	0.897549	0.71015	0.461077	0.533764	0.947805	0.987754	0.614048	0.997582	0.977609	0.997331	0.919021	0.196299	0.891156	0.864446	0.710483	0.786329	0.375283	0.856782	0.59147	0.98604	0.927284	0.998622	0.957672	0.955487	0.968009	0.845995	0.695281	0.558719	0.999932	0.968482	1	0.166031	0.508348	0.845501	0.670117	0.807512	0.999441	0.55964	0.547013	0.748599	0.807089	0.995606	0.922769	0.171831	0.764055	0.885255
Dtwd1	0.682389	0.438072	0.0145856	0.984263	0.758448	0.439856	0.592546	0.971442	0.902344	0.178191	0.997582	0.980881	0.997331	0.929406	0.216534	0.223187	0.553391	0.652614	0.225373	0.212702	0.875323	0.610391	0.658905	0.709379	0.998622	0.754197	0.955487	0.971726	0.640491	0.272871	0.722687	0.999932	0.858964	1	0.0620074	0.0377425	0.738884	0.586514	0.276621	0.999441	0.930363	0.985272	0.694185	0.969179	0.997528	0.907549	0.0275978	0.655887	0.559764
Erp27	0.466548	0.857101	0.232451	0.861226	0.759139	0.322606	0.538931	0.94577	0.987927	0.610834	0.997582	0.980881	0.997331	0.921144	0.320394	0.491635	0.393915	0.75414	0.942855	0.585572	0.641289	0.6724	0.823186	0.56904	0.998622	0.995166	0.968564	0.905016	0.733885	0.573834	0.750342	0.999932	0.933345	1	0.468323	0.919285	0.920239	0.825044	0.978133	0.999441	0.507116	0.424924	0.603086	0.794754	0.990195	0.877165	0.124952	0.741388	0.993885
Slirp	0.956692	0.932639	0.663471	0.384402	0.925032	0.995378	0.792351	0.996603	0.992776	0.863944	0.997582	0.999856	0.999056	0.963197	0.400191	0.358401	0.0334147	0.810861	0.278461	0.248511	0.294097	0.71258	0.751834	0.113393	0.998622	0.784139	0.955487	0.761193	0.969838	0.947977	0.615228	0.999932	0.989253	1	0.0921183	0.0349961	0.418881	0.622467	0.268659	0.999441	0.91563	0.965519	0.48153	0.963734	0.99683	0.821243	0.984049	0.993718	0.765488
Fcmr	0.939478	0.47395	0.00450748	0.0576389	0.753	0.157154	0.0349056	0.995432	0.9143	0.0956946	0.997582	0.980091	0.997331	0.901424	0.0304817	0.37883	0.249028	0.863137	0.0898538	0.75629	0.647005	0.375746	0.761386	0.435104	0.998622	0.639221	0.981634	0.906212	0.815819	0.250121	0.0311758	0.999932	0.858964	1	0.0287489	0.848312	0.773645	0.50421	0.965921	0.999441	0.753794	0.361389	0.664945	0.920781	0.990195	0.906973	0.0189263	0.566575	0.940993
Fam3a	0.153802	0.427382	0.773265	0.185053	0.569922	0.423596	0.16886	0.922239	0.897942	0.921137	0.997582	0.972646	0.997331	0.901424	0.498923	0.59072	0.707769	0.353877	0.645888	0.752615	0.00507057	0.777113	0.862271	0.826464	0.998622	0.912323	0.981634	0.245687	0.231917	0.365879	0.986499	0.999932	0.873844	1	0.856453	0.560758	0.187789	0.977124	0.833025	0.999441	0.44466	0.903318	0.0140628	0.777596	0.995606	0.391607	0.23334	0.772425	0.535536
Bola1	0.857818	0.748215	0.366044	0.64206	0.461166	0.462145	0.340367	0.993268	0.972806	0.698747	0.997582	0.961316	0.997331	0.901424	0.737225	0.915257	0.0912964	0.668652	0.770413	0.221019	0.807156	0.903274	0.993983	0.227214	0.998622	0.954417	0.955487	0.953092	0.575751	0.83316	0.368653	0.999932	0.987566	1	0.977317	0.401096	0.902068	0.993221	0.741982	0.999441	0.656763	0.381397	0.672117	0.866606	0.990195	0.907056	0.18569	0.764055	0.989055
Ap4b1	0.456307	0.985293	0.00479378	0.341523	0.878368	0.792489	0.966612	0.944999	0.997352	0.0972258	0.997582	0.995579	0.997331	0.996272	0.76704	0.887677	0.018048	0.291379	0.358263	0.678649	0.974508	0.919091	0.984675	0.072718	0.998622	0.81839	0.978339	0.995152	0.527452	0.844779	0.510927	0.999932	0.987566	1	0.384421	0.666653	0.367718	0.769142	0.888275	0.999441	0.696328	0.875101	0.496235	0.893388	0.995606	0.827792	0.0529698	0.741388	0.178868
Psmg3	0.19163	0.0336905	0.706799	0.679144	0.403854	0.904907	0.794382	0.922239	0.407581	0.887631	0.997582	0.955323	0.997331	0.963882	0.907078	0.184052	0.153824	0.869922	0.0275091	0.296487	0.515983	0.969931	0.605308	0.320041	0.998622	0.492544	0.955487	0.853211	0.757076	0.0887525	0.899336	0.999932	0.662232	1	0.0588363	0.998084	0.621597	0.586514	0.999672	0.999441	0.154124	0.221155	0.671627	0.593749	0.990195	0.907056	0.236476	0.772425	0.67655
Cfap410	0.394419	0.274566	0.369266	0.338365	0.38246	0.381837	0.449683	0.923029	0.843437	0.700807	0.997582	0.953233	0.997331	0.902959	0.117233	0.00424492	0.88711	0.841352	0.292694	0.933372	0.0543631	0.532103	0.0760043	0.940116	0.998622	0.792888	0.996665	0.470113	0.393561	0.304788	0.379236	0.999932	0.858964	1	0.046145	0.051969	0.163245	0.55077	0.329933	0.999441	0.951881	0.0598595	0.191491	0.978542	0.877442	0.678705	0.469407	0.797573	0.372532
Tsc22d2	0.752396	0.258527	0.787869	0.697763	0.645529	0.797251	0.743236	0.980889	0.830368	0.928416	0.997582	0.977609	0.997331	0.957029	0.0123524	0.101025	0.0318667	0.821995	0.0373942	0.580969	0.289276	0.31326	0.473974	0.109885	0.998622	0.535832	0.968564	0.760637	0.660775	0.55157	0.961128	0.999932	0.933345	1	0.000253725	0.334988	0.310177	0.0953601	0.704622	0.999441	0.935005	0.253071	0.556929	0.970859	0.990195	0.858675	0.663156	0.912379	0.900499
Ippk	0.235214	0.183791	0.857	0.964806	0.2107	0.461413	0.967565	0.922239	0.777597	0.952334	0.997582	0.953233	0.997331	0.996397	0.0125592	0.0794876	0.00119528	0.392391	0.790549	0.372694	0.373386	0.314507	0.420711	0.00937867	0.998622	0.958488	0.955487	0.792424	0.959601	0.195361	0.983432	0.999932	0.812201	1	0.093253	0.0646081	0.186762	0.622467	0.366359	0.999441	0.0684473	0.728329	0.934509	0.484699	0.995606	0.984563	0.416075	0.772425	0.845247
Trappc9	0.880399	0.781883	0.852387	0.321981	0.994695	0.923888	0.180824	0.993268	0.978525	0.951149	0.997582	0.999899	0.997331	0.901424	0.911316	0.600118	0.364068	0.559037	0.784921	0.765898	0.0730145	0.972721	0.86653	0.543644	0.998622	0.957672	0.982079	0.516924	0.899724	0.763765	0.822098	0.999932	0.986918	1	0.749127	0.484696	0.306996	0.944769	0.795473	0.999441	0.928763	0.911724	0.163482	0.969179	0.995606	0.651155	0.563473	0.866739	0.572082
Cyb5b	0.0291141	0.596924	0.00178411	0.14292	0.0626684	0.953436	0.114016	0.862875	0.935025	0.0562771	0.997582	0.953233	0.997331	0.901424	0.0373679	0.267971	1.61005e-05	0.454763	0.0360876	0.84094	0.0271562	0.406026	0.696992	0.000303295	0.998622	0.526744	0.989025	0.374206	0.785402	0.803975	0.9328	0.999932	0.987566	1	0.956212	0.331567	0.220963	0.988845	0.702514	0.999441	0.0227783	0.878153	0.0734302	0.424825	0.995606	0.559477	0.230765	0.772425	0.85367
Zfp335	0.58442	0.322833	0.901861	0.832116	0.628709	0.621503	0.790836	0.948409	0.864227	0.967909	0.997582	0.976856	0.997331	0.963197	0.698615	0.174784	0.0463934	0.692562	0.201569	0.668322	0.82953	0.883134	0.59313	0.142653	0.998622	0.743348	0.97747	0.959467	0.979357	0.699467	0.724462	0.999932	0.969789	1	0.172998	0.574797	0.683006	0.678453	0.838762	0.999441	0.476848	0.349565	0.962443	0.794754	0.990195	0.989527	0.862479	0.956884	0.640458
Klhl21	0.408379	0.239733	0.0370182	0.632429	0.830746	0.770586	0.729917	0.925294	0.820046	0.293399	0.997582	0.989604	0.997331	0.953079	0.865761	0.0710069	0.173126	0.371305	0.291931	0.872442	0.515468	0.955743	0.399441	0.344784	0.998622	0.792542	0.994128	0.853211	0.724462	0.570246	0.612606	0.999932	0.933345	1	0.3505	0.21085	0.352784	0.758563	0.608598	0.999441	0.337333	0.227127	0.926898	0.723291	0.990195	0.981476	0.310026	0.772425	0.528809
Clec4b1	0.238825	0.779803	0.810399	0.49699	0.895046	0.301298	0.832721	0.922239	0.978525	0.936473	0.997582	0.998041	0.997331	0.976402	0.769341	0.585062	5.5748e-06	0.714474	0.622735	0.485448	0.3904	0.91996	0.859713	0.000131998	0.998622	0.905866	0.959141	0.797521	0.397464	0.563596	0.695551	0.999932	0.933345	1	0.916732	0.757294	0.470493	0.983067	0.935025	0.999441	0.406711	0.41193	0.57848	0.753143	0.990195	0.868982	0.425107	0.773307	0.73298
Mien1	0.250487	0.577345	0.0499087	0.86205	0.633073	0.154885	0.216516	0.922239	0.932482	0.337027	0.997582	0.977247	0.997331	0.901424	0.794111	0.313694	0.0348734	0.913639	0.182818	0.0992469	0.344097	0.928901	0.725964	0.116617	0.998622	0.724266	0.899663	0.779399	0.535576	0.100601	0.237751	0.999932	0.687601	1	0.279959	0.0312548	0.504735	0.744347	0.253577	0.999441	0.33944	0.561588	0.503824	0.724817	0.995606	0.832669	0.395305	0.772425	0.328893
Ufsp2	0.240758	0.354293	0.496304	0.263514	0.326193	0.17617	0.118882	0.922239	0.873319	0.77924	0.997582	0.953233	0.997331	0.901424	0.995461	0.0383156	0.695655	0.337701	0.0153086	0.296832	0.0299292	0.998242	0.292343	0.818003	0.998622	0.42144	0.955487	0.390742	0.881192	0.762409	0.799494	0.999932	0.986918	1	0.0246734	0.432645	0.355456	0.490263	0.761476	0.999441	0.127373	0.118811	0.0660216	0.565609	0.990195	0.545114	0.154076	0.764055	0.273033
Pcnx4	0.187334	0.145604	0.923996	0.188858	0.863963	0.849086	0.926723	0.922239	0.73211	0.973973	0.997582	0.992504	0.997331	0.988665	0.161945	0.9671	0.910405	0.970049	0.982181	0.124318	0.193276	0.575873	0.999044	0.953895	0.998895	0.998173	0.928418	0.676173	0.365053	0.344351	0.363808	0.999932	0.86485	1	0.308921	0.298496	0.373594	0.744474	0.683148	0.999441	0.346525	0.26856	0.353512	0.726862	0.990195	0.783128	0.87724	0.956884	0.634808
Rab43	0.135517	0.787506	0.197067	0.973484	0.187882	0.895478	0.841889	0.922239	0.978686	0.584547	0.997582	0.953233	0.997331	0.978032	0.494627	0.55726	0.317661	0.384153	0.716769	0.824774	0.172946	0.774388	0.850364	0.504288	0.998622	0.940812	0.986598	0.656028	0.153209	0.871771	0.914381	0.999932	0.987566	1	0.762778	0.460828	0.713518	0.949595	0.781776	0.999441	0.531527	0.783446	0.180483	0.796146	0.995606	0.671088	0.651998	0.912379	0.958421
Oxld1	0.965493	0.415861	0.336645	0.67353	0.636207	0.494604	0.22467	0.996921	0.891997	0.685344	0.997582	0.977609	0.997331	0.901424	0.651112	0.0414735	0.195673	0.0727252	0.638302	0.888818	0.595764	0.855648	0.302915	0.37324	0.998622	0.910471	0.995068	0.889334	0.778318	0.892734	0.649157	0.999932	0.987566	1	0.759364	0.10637	0.24329	0.948972	0.462493	0.999441	0.746897	0.214947	0.168906	0.917288	0.990195	0.659891	0.74522	0.931362	0.346429
Crispld2	0.20579	0.575407	0.539084	0.776357	0.133735	0.250333	0.729713	0.922239	0.932234	0.802183	0.997582	0.953233	0.997331	0.953079	0.304857	0.905988	0.261572	0.410488	0.0341018	0.364714	0.841648	0.66709	0.990242	0.449914	0.998622	0.513283	0.955487	0.963559	0.921158	0.18206	0.977991	0.999932	0.807075	1	0.33822	0.25037	0.255117	0.753353	0.650933	0.999441	0.0913117	0.710713	0.683704	0.522856	0.995606	0.907085	0.86673	0.956884	0.128975
Tmem86a	0.899285	0.306636	0.00607536	0.402818	0.99319	0.926825	0.12421	0.993268	0.857028	0.11331	0.997582	0.999856	0.997331	0.901424	0.00962371	4.6215e-06	8.81443e-09	0.859095	0.0029946	1.00266e-06	0.0152624	0.292371	0.000326632	5.96084e-07	0.998622	0.293221	0.00117813	0.327634	0.920807	0.502745	0.705534	0.999932	0.931186	1	0.00548742	1.63729e-06	0.230876	0.405982	0.000210739	0.999441	0.880102	0.356228	0.0472362	0.957349	0.990195	0.50013	0.0106254	0.486037	0.402645
Dennd10	0.0768471	0.0989912	0.768943	0.151962	0.193515	0.5415	0.33121	0.922239	0.647714	0.917733	0.997582	0.953233	0.997331	0.901424	0.6792	0.515294	0.831882	0.756637	0.965419	0.7873	0.975174	0.87351	0.834114	0.906702	0.998622	0.997904	0.984659	0.995172	0.0191171	0.0519266	0.0499702	0.999932	0.53658	1	0.795005	0.778632	0.836106	0.961179	0.943062	0.999441	0.746318	0.53277	0.812442	0.917288	0.995606	0.947532	0.431296	0.774178	0.564492
1810055G02Rik	0.897064	0.636471	0.187992	0.202223	0.710698	0.0103435	0.520903	0.993268	0.94398	0.578627	0.997582	0.977609	0.997331	0.916141	0.160666	0.252744	0.000221665	0.26218	0.411253	0.0167588	0.429032	0.574407	0.684287	0.00245135	0.998622	0.836319	0.61449	0.812261	0.919249	0.126166	0.58877	0.999932	0.730309	1	0.102006	0.21745	0.732539	0.631727	0.617082	0.999441	0.765748	0.0453717	0.22632	0.925646	0.781321	0.71049	0.000223743	0.104488	0.602636
Tmem100	0.777592	0.0694237	0.29363	0.277532	0.392293	0.469145	0.516951	0.986948	0.564422	0.660374	0.997582	0.953233	0.997331	0.916009	0.15451	0.645163	0.000327195	0.582119	0.347016	0.0404356	0.35862	0.56755	0.888097	0.0033761	0.998622	0.81084	0.793735	0.787622	0.445591	0.348199	0.704255	0.999932	0.86556	1	0.128832	0.233667	0.863032	0.653123	0.635833	0.999441	0.717039	0.0990973	0.271751	0.90593	0.980996	0.742088	0.00773988	0.486037	0.813985
Sil1	0.53105	0.0968307	0.887704	0.216495	0.675539	0.0531903	0.70998	0.947805	0.642163	0.96438	0.997582	0.977609	0.997331	0.951628	0.915557	0.496018	0.448241	0.671192	0.384259	0.373761	0.332742	0.973006	0.826778	0.619445	0.998622	0.827963	0.955487	0.77769	0.911863	0.0147595	0.474462	0.999932	0.300903	1	0.595628	0.339493	0.770495	0.866855	0.707095	0.999441	0.458617	0.772264	0.295107	0.787254	0.995606	0.756042	0.368165	0.772425	0.466562
Mxra7	0.0437865	0.56401	0.166587	0.523399	0.145341	0.618025	0.922812	0.92073	0.929315	0.559656	0.997582	0.953233	0.997331	0.987466	0.00049762	0.986555	0.00809057	0.733093	0.751926	0.998616	0.370406	0.125211	0.999044	0.0403028	0.998622	0.95116	0.999701	0.792424	0.515829	0.310322	0.514786	0.999932	0.858964	1	4.37045e-05	0.785067	0.0791718	0.0205324	0.945384	0.999441	0.05449	0.933123	0.766676	0.461844	0.995606	0.927734	0.675503	0.912379	0.783053
Mterf4	0.0681737	0.506836	0.296991	0.839373	0.752801	0.114754	0.477837	0.922239	0.921149	0.663116	0.997582	0.980091	0.997331	0.908066	0.292688	0.584836	0.0136254	0.705685	0.242458	0.043361	0.504027	0.659356	0.859713	0.0592958	0.998622	0.761836	0.793735	0.849453	0.143155	0.400541	0.661548	0.999932	0.890154	1	0.900679	0.0619273	0.722825	0.980711	0.358507	0.999441	0.227613	0.210831	0.593359	0.665693	0.990195	0.87509	0.397735	0.772425	0.923779
Tmem179b	0.320609	0.488486	0.312113	0.343317	0.354242	0.514208	0.733333	0.922239	0.917324	0.672288	0.997582	0.953233	0.997331	0.954786	0.229169	0.295025	0.00662962	0.429067	0.262706	0.766096	0.865099	0.61863	0.714844	0.0346615	0.998622	0.772813	0.982079	0.968894	0.899229	0.909758	0.337979	0.999932	0.987566	1	0.749777	0.339913	0.35489	0.944769	0.707156	0.999441	0.221348	0.358816	0.694596	0.660116	0.990195	0.907549	0.264812	0.772425	0.555918
Polr2f	0.541379	0.856566	0.476011	0.391592	0.825543	0.304841	0.0697897	0.947805	0.987927	0.76855	0.997582	0.989556	0.997331	0.901424	0.0198066	0.932206	0.0578409	0.060161	0.178173	0.237391	0.333164	0.33501	0.997604	0.16627	0.998622	0.723343	0.955487	0.77769	0.759268	0.539419	0.502574	0.999932	0.933345	1	0.00887689	0.383875	0.486249	0.43824	0.732363	0.999441	0.585192	0.414595	0.0843006	0.823987	0.990195	0.575497	0.0144856	0.526095	0.381789
Ccdc91	0.732856	0.558204	0.0375523	0.613137	0.399649	0.814316	0.323228	0.979206	0.929315	0.295359	0.997582	0.953235	0.997331	0.901424	0.96743	0.565975	0.74344	0.899654	0.0739939	0.42662	0.0508752	0.990058	0.851772	0.852193	0.998622	0.627513	0.955487	0.458246	0.779855	0.860061	0.808483	0.999932	0.987566	1	0.22089	0.775102	0.264861	0.725738	0.94179	0.999441	0.178259	0.400522	0.103126	0.620902	0.990195	0.596658	0.118263	0.741388	0.915506
Coa6	0.188205	0.856586	0.967144	0.780088	0.684192	0.570448	0.490684	0.922239	0.987927	0.986239	0.997582	0.977609	0.997331	0.911678	0.31985	0.483879	0.583883	0.858168	0.0399952	0.996237	0.141415	0.6724	0.819411	0.731959	0.998622	0.550773	0.999656	0.62755	0.24469	0.793282	0.799172	0.999932	0.987566	1	0.018311	0.380437	0.134612	0.465001	0.730467	0.999441	0.520518	0.583989	0.470137	0.795049	0.995606	0.813463	0.670732	0.912379	0.378933
1810064F22Rik	0.103313	0.368401	0.528143	0.992534	0.127178	0.931102	0.256082	0.922239	0.873482	0.797133	0.999149	0.953233	0.997331	0.901424	0.0807814	0.178795	0.973302	0.90315	0.205567	0.767484	0.244195	0.492122	0.599009	0.986775	0.998622	0.743375	0.982079	0.719822	0.899295	0.533392	0.37246	0.999932	0.933345	1	0.717368	0.224036	0.349891	0.928406	0.625867	0.999441	0.0646958	0.60346	0.467853	0.475892	0.995606	0.813463	0.846395	0.95683	0.322277
Trappc6a	0.484944	0.526117	0.00440019	0.586418	0.38042	0.955312	0.65666	0.947805	0.924579	0.094924	0.997582	0.953233	0.997331	0.940065	0.497205	0.503997	0.218815	0.25309	0.0420169	0.780684	0.992553	0.776058	0.829716	0.401715	0.998622	0.559431	0.983492	0.997647	0.905627	0.706824	0.929838	0.999932	0.972573	1	0.0590141	0.94801	0.473864	0.586514	0.985394	0.999441	0.258495	0.673845	0.494571	0.67996	0.995606	0.82723	0.190428	0.764055	0.263175
Fam114a2	0.635704	0.867901	0.00833438	0.594851	0.769808	0.565709	0.600321	0.957836	0.990553	0.135777	0.997582	0.981399	0.997331	0.930876	0.486488	0.390869	0.00093672	0.636934	0.885672	0.785496	0.585381	0.770228	0.766407	0.00772383	0.998622	0.986779	0.984601	0.885374	0.882652	0.806884	0.980964	0.999932	0.987566	1	0.652217	0.368088	0.976132	0.892065	0.720925	0.999441	0.579213	0.566604	0.450219	0.819628	0.995606	0.808759	0.531736	0.845922	0.154696
Slc38a10	0.307534	0.18427	0.318966	0.265581	0.320846	0.257958	0.253974	0.922239	0.777597	0.677272	0.997582	0.953233	0.997331	0.901424	0.0446558	0.490358	0.751916	0.543314	0.617631	0.767335	0.298105	0.432387	0.822824	0.856936	0.998622	0.905791	0.982079	0.76167	0.284297	0.220748	0.257148	0.999932	0.839573	1	0.0229464	0.326154	0.690586	0.486044	0.698213	0.999441	0.388037	0.818207	0.362055	0.739104	0.995606	0.784383	0.692186	0.912379	0.70439
Ufl1	0.0838508	0.0879479	0.996934	0.319445	0.670657	0.335055	0.0846542	0.922239	0.621587	0.999257	0.997582	0.977609	0.997331	0.901424	0.614677	0.0576464	0.331321	0.545591	0.0996175	0.368326	0.0347812	0.832862	0.355737	0.516034	0.998622	0.651638	0.955487	0.408177	0.418049	0.10748	0.687882	0.999932	0.699488	1	0.417727	0.108483	0.391432	0.795978	0.466214	0.999441	0.0728741	0.574469	0.0303466	0.4919	0.995606	0.460894	0.877203	0.956884	0.621247
Odf3b	0.517096	0.233475	0.99455	0.289056	0.683831	0.146029	0.52064	0.947805	0.81335	0.998132	0.997582	0.977609	0.997331	0.916141	0.930754	0.737175	0.0665486	0.439032	0.837533	0.909744	0.329716	0.978042	0.922941	0.182784	0.998622	0.971593	0.996621	0.777438	0.476663	0.0610097	0.728883	0.999932	0.577815	1	0.913976	0.909196	0.902758	0.983067	0.976417	0.999441	0.839243	0.808811	0.272185	0.94874	0.995606	0.742088	0.392042	0.772425	0.24043
Mzb1	0.332137	0.247343	0.140905	0.924927	0.955488	0.160461	0.862962	0.922239	0.823737	0.522282	0.997582	0.999856	0.997331	0.981201	0.265266	0.58306	0.908495	0.696006	0.0493431	0.915709	0.758106	0.643825	0.859324	0.952577	0.998622	0.586175	0.996665	0.939832	0.511763	0.110013	0.855808	0.999932	0.701902	1	0.0352517	0.882883	0.695454	0.521514	0.972061	0.999441	0.463476	0.786952	0.955324	0.789775	0.995606	0.988378	0.257681	0.772425	0.972983
Oma1	0.173491	0.483998	0.00315085	0.362804	0.134559	0.833455	0.880017	0.922239	0.916846	0.0777376	0.997582	0.953233	0.997331	0.983025	0.284367	0.805904	0.244147	0.257166	0.0991127	0.444151	0.767756	0.654581	0.947842	0.429293	0.998622	0.65151	0.955487	0.942669	0.940161	0.752932	0.426113	0.999932	0.986696	1	0.661014	0.585897	0.336643	0.896763	0.842283	0.999441	0.0672483	0.610458	0.640736	0.481972	0.995606	0.893226	0.406746	0.772425	0.354737
Eif1ad	0.781794	0.879423	0.129422	0.315756	0.917243	0.240282	0.412531	0.987567	0.9906	0.501675	0.997582	0.999856	0.997331	0.901424	0.171261	0.667143	0.00016357	0.293753	0.299267	0.115619	0.196099	0.580188	0.898417	0.00193892	0.998622	0.79552	0.920667	0.679059	0.78868	0.510683	0.857018	0.999932	0.931796	1	0.0403477	0.206765	0.844716	0.537762	0.604621	0.999441	0.919051	0.324747	0.186066	0.964526	0.990195	0.675068	0.312079	0.772425	0.698413
Gatc	0.772235	0.928446	0.395825	0.436087	0.531266	0.801825	0.208723	0.985341	0.992776	0.71061	0.997582	0.968789	0.997331	0.901424	0.891346	0.886358	0.590426	0.270404	0.681197	0.610212	0.148369	0.963839	0.98422	0.736857	0.998622	0.927332	0.970027	0.632791	0.545679	0.891313	0.780698	0.999932	0.987566	1	0.880856	0.557	0.827985	0.978544	0.830287	0.999441	0.790619	0.81629	0.143454	0.935487	0.995606	0.638946	0.382635	0.772425	0.649005
Il34	0.18697	0.0222721	0.338641	0.050979	0.101994	0.128148	0.352363	0.922239	0.330739	0.686632	0.997582	0.953233	0.997331	0.901424	0.693166	0.0780342	0.00156566	0.255138	0.362059	0.451741	0.0600955	0.880995	0.415828	0.011578	0.998622	0.819287	0.955487	0.486934	0.0196563	0.00195378	0.283826	0.999932	0.0876287	1	0.248239	0.0114019	0.45909	0.740462	0.140409	0.999441	0.908182	0.647969	0.109567	0.962046	0.995606	0.608088	0.0896649	0.741388	0.251191
Alkbh4	0.564351	0.696858	0.796121	0.957303	0.813091	0.630286	0.818239	0.947805	0.958114	0.932673	0.997582	0.987287	0.997331	0.971716	0.331635	0.214304	0.0188143	0.47302	0.223265	0.717738	0.750979	0.674742	0.64711	0.0748747	0.998622	0.753793	0.981634	0.935732	0.623306	0.976351	0.86922	0.999932	0.995483	1	0.0567391	0.577243	0.412695	0.580786	0.839377	0.999441	0.766231	0.447514	0.866023	0.925981	0.990195	0.964793	0.588031	0.884767	0.910272
Pcdh1	0.914147	0.604107	0.844753	0.582552	0.1197	0.615116	0.491918	0.993361	0.937056	0.950159	0.997582	0.953233	0.997331	0.911678	0.0609602	0.635439	0.796787	0.800694	0.84641	0.741745	0.278386	0.46202	0.883361	0.885632	0.998622	0.974367	0.981634	0.75395	0.253954	0.419084	0.952941	0.999932	0.897573	1	0.0912624	0.546249	0.523288	0.622467	0.82411	0.999441	0.322745	0.964161	0.400415	0.713265	0.99683	0.797486	0.842683	0.954974	0.132831
Urgcp	0.69981	0.343767	0.889756	0.375909	0.459646	0.662965	0.932664	0.972514	0.871791	0.96438	0.997582	0.961316	0.997331	0.990251	0.723292	0.143914	0.0456996	0.721964	0.554306	0.960418	0.315626	0.896249	0.555895	0.141401	0.998622	0.883812	0.998116	0.771382	0.80569	0.738136	0.50754	0.999932	0.983055	1	0.804981	0.408697	0.405208	0.964537	0.745932	0.999441	0.376975	0.322233	0.56173	0.732211	0.990195	0.860741	0.951967	0.979676	0.715327
Sft2d2	0.874623	0.369484	0.215447	0.283384	0.460792	0.959428	0.389883	0.993268	0.874038	0.600237	0.997582	0.961316	0.997331	0.901424	0.560504	0.120964	0.517999	0.796044	0.204276	0.763627	0.0271302	0.804476	0.511499	0.681864	0.998622	0.743375	0.981682	0.374206	0.565181	0.566257	0.851166	0.999932	0.933345	1	0.0940375	0.131239	0.118821	0.622467	0.51082	0.999441	0.590076	0.520926	0.124649	0.827516	0.995453	0.628948	0.354473	0.772425	0.966634
Ppp1r35	0.838325	0.524281	0.480523	0.52066	0.600389	0.330651	0.969562	0.990768	0.924169	0.77065	0.997582	0.976381	0.997331	0.99669	0.661836	0.352008	0.992504	0.5732	0.999225	0.329242	0.907682	0.861551	0.74745	0.996209	0.998622	0.999756	0.955487	0.979139	0.635759	0.856943	0.637955	0.999932	0.987566	1	0.676076	0.992171	0.712137	0.906758	0.998291	0.999441	0.827871	0.245774	0.688277	0.946195	0.990195	0.907085	0.198422	0.764055	0.877714
Fam210b	0.748103	0.0035977	0.497347	0.15736	0.00292143	0.524205	0.129425	0.980265	0.10217	0.77924	0.997582	0.953233	0.997331	0.901424	0.0589767	0.347446	2.28476e-07	0.613435	0.00945195	0.0868822	0.00315873	0.460067	0.745149	9.3785e-06	0.998622	0.370078	0.89699	0.239344	0.113249	0.0167336	0.997923	0.999932	0.317061	1	0.705073	0.977514	0.0574345	0.923706	0.994125	0.999441	0.0163093	0.0618743	0.032392	0.402894	0.888947	0.46896	0.970886	0.988131	0.105228
Chmp4b	0.391627	0.240461	0.962275	0.755237	0.558689	0.153262	0.934507	0.923029	0.821498	0.985149	0.997582	0.971366	0.997331	0.990467	0.270951	0.888631	0.557372	0.822261	0.394115	0.642952	0.695616	0.646466	0.984923	0.712625	0.998622	0.830883	0.972637	0.921504	0.293073	0.084053	0.763389	0.999932	0.656402	1	0.149624	0.69899	0.688362	0.663004	0.908146	0.999441	0.909321	0.784051	0.867058	0.962485	0.995606	0.964793	0.427614	0.773307	0.635526
Thap3	0.862078	0.809359	0.167932	0.466379	0.666712	0.0441373	0.137528	0.993268	0.982719	0.560835	0.997582	0.977609	0.997331	0.901424	0.843717	0.404326	0.0717371	0.0491804	0.93217	0.286105	0.686824	0.947804	0.772806	0.19261	0.998622	0.993726	0.955487	0.91837	0.618162	0.0837374	0.552426	0.999932	0.655257	1	0.932824	0.951552	0.147278	0.985364	0.986026	0.999441	0.85302	0.238825	0.183304	0.950768	0.990195	0.672418	0.194147	0.764055	0.0365109
Romo1	0.921874	0.447134	0.849733	0.349628	0.984004	0.365405	0.320232	0.995022	0.904844	0.950468	0.997582	0.999856	0.997331	0.901424	0.812036	0.161671	0.879341	0.202053	0.643218	0.241244	0.594493	0.935892	0.580151	0.935542	0.998622	0.911749	0.955487	0.888855	0.985933	0.245496	0.998893	0.999932	0.858962	1	0.682327	0.0939659	0.594586	0.910416	0.439673	0.999441	0.902654	0.877132	0.195445	0.960587	0.995606	0.680443	0.405435	0.772425	0.320811
Sppl2a	0.731066	0.117176	0.309033	0.183673	0.891125	0.412388	0.0548467	0.979206	0.684292	0.669025	0.997582	0.998041	0.997331	0.901424	0.980871	0.341593	0.953138	0.185076	0.962545	0.21307	0.0925049	0.994054	0.740052	0.976405	0.998622	0.997109	0.955487	0.557481	0.809162	0.563905	0.744086	0.999932	0.933345	1	0.889485	0.885631	0.872308	0.980521	0.972602	0.999441	0.810951	0.083043	0.0200027	0.940471	0.933133	0.416469	0.382398	0.772425	0.99664
Atp5mpl	0.343197	0.662051	0.45981	0.155151	0.616648	0.684187	0.862943	0.922239	0.948405	0.756426	0.997582	0.976655	0.997331	0.981201	0.0906732	0.781932	0.410314	0.529565	0.88354	0.73694	0.35805	0.505928	0.938043	0.583856	0.998622	0.986266	0.981634	0.787131	0.766559	0.591116	0.289168	0.999932	0.93919	1	0.19845	0.589103	0.828742	0.704061	0.843267	0.999441	0.262062	0.967057	0.360588	0.682745	0.99683	0.784165	0.959957	0.98279	0.85793
Slc23a4	0.701573	0.799707	0.0885997	0.238905	0.149762	0.337931	0.167032	0.973257	0.981491	0.429298	0.997582	0.953233	0.997331	0.901424	0.300263	0.951595	0.0936105	0.156864	0.44933	0.572546	0.249701	0.663921	0.999044	0.231563	0.998622	0.846435	0.968564	0.72781	0.510336	0.489291	0.925039	0.999932	0.929343	1	0.867093	0.853021	0.849284	0.9772	0.965921	0.999441	0.132878	0.48044	0.0501397	0.572229	0.992638	0.512636	0.356027	0.772425	0.241918
Cmc1	0.434889	0.113422	0.545712	0.74814	0.396855	0.170759	0.548271	0.93532	0.674365	0.805443	0.997582	0.953233	0.997331	0.924097	0.224249	0.0171521	0.448447	0.543199	0.998125	0.79746	0.180954	0.616299	0.185281	0.619547	0.998622	0.999122	0.985168	0.66585	0.933763	0.844109	0.851249	0.999932	0.987566	1	0.533214	0.143882	0.21002	0.83935	0.528092	0.999441	0.257446	0.0657943	0.539682	0.679263	0.896057	0.849351	0.377137	0.772425	0.349372
Higd2a	0.560353	0.0406022	0.499665	0.937419	0.612361	0.629771	0.675578	0.947805	0.450072	0.780467	0.997582	0.976655	0.997331	0.942277	0.269511	0.175559	0.0993462	0.780564	0.747833	0.537966	0.38202	0.646276	0.594902	0.241119	0.998622	0.94918	0.965098	0.795523	0.884693	0.118879	0.845879	0.999932	0.718013	1	0.484034	0.5012	0.437184	0.831607	0.804269	0.999441	0.392393	0.166036	0.643831	0.741961	0.990195	0.894755	0.687407	0.912379	0.723323
Aopep	0.112553	0.868391	0.107404	0.745874	0.110798	0.695908	0.639515	0.922239	0.990553	0.464612	0.997582	0.953233	0.997331	0.938255	0.116705	0.962171	0.13224	0.788764	0.102369	0.667869	0.668211	0.531504	0.999044	0.290663	0.998622	0.653272	0.97747	0.910713	0.182922	0.250816	0.244099	0.999932	0.858964	1	0.157362	0.0016448	0.860459	0.667907	0.0423412	0.999441	0.138816	0.751825	0.695962	0.582655	0.995606	0.907978	0.0951174	0.741388	0.32171
Tmem167b	0.759885	0.832598	0.530164	0.244158	0.210843	0.728045	0.761114	0.983126	0.985535	0.797786	0.997582	0.953233	0.997331	0.959502	0.280285	0.576047	0.0967425	0.436799	0.923566	0.188443	0.339767	0.651826	0.856707	0.236826	0.998622	0.991155	0.955487	0.778654	0.285548	0.986941	0.500723	0.999932	0.997393	1	0.349878	0.080496	0.928911	0.758563	0.408878	0.999441	0.508263	0.671666	0.32419	0.794754	0.995606	0.769408	0.412593	0.772425	0.421811
Golph3l	0.914291	0.913679	0.913692	0.855398	0.983367	0.957174	0.0706142	0.993361	0.991833	0.972563	0.997582	0.999856	0.997331	0.901424	0.959197	0.966359	0.144072	0.231489	0.969993	0.943366	0.213282	0.987793	0.999044	0.307442	0.998622	0.998069	0.996665	0.693076	0.942224	0.962725	0.162036	0.999932	0.99225	1	0.419054	0.306852	0.571002	0.797007	0.685517	0.999441	0.937296	0.915009	0.251402	0.971253	0.995606	0.733337	0.396676	0.772425	0.336787
Tmem68	0.186683	0.430125	0.0847007	0.437616	0.570224	0.181343	0.396174	0.922239	0.899082	0.422221	0.997582	0.972646	0.997331	0.901424	0.308975	0.307077	0.135466	0.246249	0.328888	0.173445	0.608145	0.669221	0.723803	0.29497	0.998622	0.808555	0.955487	0.893974	0.639662	0.748147	0.987876	0.999932	0.985022	1	0.959368	0.768079	0.642757	0.988971	0.938125	0.999441	0.082305	0.057601	0.137686	0.509781	0.871528	0.637287	0.145645	0.759111	0.484458
Aplf	0.374603	0.0431283	0.661686	0.981214	0.289893	0.726804	0.909188	0.922239	0.466287	0.862909	0.997582	0.953233	0.997331	0.987385	0.0903238	0.115657	0.0253183	0.999587	0.184582	0.147872	0.937081	0.505928	0.504869	0.0935505	0.999946	0.725276	0.946526	0.985164	0.247003	0.230183	0.946895	0.999932	0.850674	1	0.0189653	0.876152	0.998373	0.475195	0.971307	0.999441	0.943213	0.0729328	0.922287	0.973023	0.905253	0.980291	0.435746	0.778178	0.663268
Coa7	0.639335	0.604791	0.110819	0.763593	0.517407	0.91382	0.497813	0.959105	0.937056	0.470072	0.997582	0.968789	0.997331	0.913567	0.194709	0.806069	0.0148727	0.991704	0.695006	0.656538	0.165194	0.591175	0.947842	0.0630029	0.999529	0.932361	0.975314	0.647281	0.913673	0.726942	0.838905	0.999932	0.978845	1	0.506063	0.796966	0.350968	0.834944	0.949833	0.999441	0.237838	0.714507	0.309921	0.676585	0.995606	0.761448	0.043015	0.741388	0.547897
Tlcd2	0.286598	0.715472	0.00793902	0.677877	0.296789	0.822911	0.644579	0.922239	0.964698	0.132212	0.997582	0.953233	0.997331	0.938695	0.52287	0.719805	0.97564	0.72865	0.105107	0.0507419	0.0857377	0.789298	0.915924	0.988012	0.998622	0.657791	0.813844	0.54039	0.277808	0.78588	0.6481	0.999932	0.987566	1	0.116118	0.0738418	0.122075	0.640282	0.395315	0.999441	0.516626	0.313413	0.364269	0.795049	0.990195	0.785152	0.0895323	0.741388	0.130602
Dennd2d	0.549843	0.584276	0.982307	0.38178	0.768094	0.367964	0.937732	0.947805	0.933063	0.992976	0.997582	0.981399	0.997331	0.991217	0.360838	0.580578	0.730465	0.397127	0.562272	0.329514	0.877402	0.687339	0.858897	0.843638	0.998622	0.886527	0.955487	0.972371	0.528919	0.304459	0.544477	0.999932	0.858964	1	0.282563	0.25085	0.608651	0.744347	0.651282	0.999441	0.835883	0.796445	0.527876	0.948316	0.995606	0.844961	0.786676	0.942998	0.538999
Mmadhc	0.626544	0.901783	0.630794	0.317454	0.113737	0.788891	0.391218	0.953551	0.991833	0.844522	0.997582	0.953233	0.997331	0.901424	0.787908	0.2493	0.366655	0.805537	0.012232	0.686299	0.0328798	0.927067	0.682883	0.546119	0.998622	0.38714	0.980287	0.402633	0.537383	0.884037	0.893542	0.999932	0.987566	1	0.102783	0.358102	0.241378	0.631727	0.717636	0.999441	0.0488609	0.756246	0.0774604	0.451615	0.995606	0.567897	0.938129	0.974181	0.369117
Use1	0.18484	0.55483	0.298469	0.632276	0.378057	0.140484	0.667658	0.922239	0.929315	0.664088	0.997582	0.953233	0.997331	0.941372	0.0660758	0.814133	0.206417	0.657965	0.648058	0.265135	0.681693	0.470784	0.953033	0.386196	0.998622	0.913757	0.955487	0.916676	0.717956	0.153026	0.489734	0.999932	0.762531	1	0.258529	0.371082	0.497269	0.744347	0.722778	0.999441	0.152648	0.499207	0.976321	0.592924	0.993877	0.991794	0.0692407	0.741388	0.981231
Prorsd1	0.887166	0.567335	0.528286	0.355762	0.75893	0.955174	0.579875	0.993268	0.930081	0.797221	0.997582	0.980881	0.997331	0.928578	0.188679	0.362663	0.0125825	0.458528	0.236377	0.798112	0.496444	0.58844	0.754824	0.0562147	0.998622	0.761681	0.985168	0.845528	0.686602	0.662479	0.723689	0.999932	0.959206	1	0.0526641	0.314187	0.865295	0.570722	0.689983	0.999441	0.890614	0.727315	0.380454	0.958009	0.995606	0.789824	0.93629	0.973612	0.732151
Pigx	0.196863	0.0640508	0.0364477	0.702972	0.676995	0.376665	0.771347	0.922239	0.542244	0.29154	0.997582	0.977609	0.997331	0.960183	0.444049	0.0684435	0.145644	0.984503	0.3339	0.380648	0.889662	0.742715	0.390394	0.309614	0.999529	0.809244	0.955487	0.976562	0.438811	0.0487879	0.616574	0.999932	0.52222	1	0.969294	0.062246	0.880578	0.991373	0.359032	0.999441	0.301221	0.528696	0.961338	0.702047	0.995606	0.989527	0.11281	0.741388	0.754041
Ints14	0.747815	0.142481	0.0335308	0.642403	0.310992	0.511665	0.295431	0.980265	0.73053	0.278436	0.997582	0.953233	0.997331	0.901424	0.070086	0.133805	0.892365	0.62922	0.937514	0.152374	0.199045	0.477398	0.538199	0.9432	0.998622	0.994766	0.946526	0.68186	0.726998	0.548573	0.368585	0.999932	0.933345	1	0.134235	0.887674	0.188056	0.653859	0.972858	0.999441	0.282619	0.0759094	0.568646	0.691408	0.913463	0.863026	0.404054	0.772425	0.706507
Fam25c	0.957637	8.88e-07	0.000194287	0.86921	0.157718	0.000740822	0.198269	0.996603	9.48e-05	0.0141573	0.997582	0.953233	0.780152	0.901424	0.125814	1.76532e-06	0.0282379	0.0855166	0.988727	0.00123686	0.775116	0.538385	0.000153648	0.10108	0.998622	0.99885	0.150993	0.943184	0.402465	0.0359666	0.363208	0.999932	0.466976	1	0.134615	0.0782787	0.149341	0.653859	0.404125	0.999441	0.529921	2.49717e-05	0.368082	0.795627	0.00558653	0.785552	7.52e-10	1.17e-06	0.0594372
Mib2	0.142757	0.0551571	0.128236	0.582801	0.156211	0.160288	0.66396	0.922239	0.511823	0.499553	0.997582	0.953233	0.997331	0.940698	0.0866229	0.435262	0.0912344	0.815091	0.191054	0.298456	0.461657	0.500657	0.794366	0.227214	0.998622	0.731929	0.955487	0.828904	0.843917	0.0184974	0.912596	0.999932	0.329106	1	0.685963	0.196147	0.758817	0.912858	0.591084	0.999441	0.0793504	0.732935	0.51771	0.506231	0.995606	0.838836	0.267496	0.772425	0.469795
Pdxdc1	0.136903	0.959128	0.697357	0.0165032	0.147071	0.32133	0.140863	0.922239	0.9936	0.883003	0.997582	0.953233	0.997331	0.901424	0.266673	0.871362	0.0050839	0.0192948	0.0309068	0.244555	0.0843917	0.64501	0.978564	0.0284287	0.998622	0.505416	0.955487	0.538916	0.91297	0.435884	0.423825	0.999932	0.908192	1	0.537542	0.297564	0.468721	0.841709	0.683148	0.999441	0.0498346	0.508089	0.0119714	0.455253	0.993877	0.390496	0.355341	0.772425	0.241176
Tceanc2	0.144868	0.0296011	0.497816	0.254157	0.0401423	0.664339	0.966947	0.922239	0.382675	0.77924	0.997582	0.953233	0.997331	0.996284	0.294187	0.0601549	0.115168	0.743563	0.00723932	0.720498	0.17068	0.660059	0.364211	0.265859	0.998622	0.34696	0.981634	0.653787	0.611656	0.0597064	0.369342	0.999932	0.571989	1	0.0954499	0.278466	0.188325	0.625877	0.671893	0.999441	0.0284323	0.308163	0.452851	0.429502	0.990195	0.808759	0.507533	0.826999	0.613133
Spns1	0.354689	0.734505	0.118019	0.425081	0.425673	0.627569	0.317496	0.922239	0.969712	0.480668	0.997582	0.955323	0.997331	0.901424	0.562996	0.767381	0.230193	0.195916	0.31859	0.520884	0.58771	0.805692	0.932564	0.414127	0.998622	0.802698	0.964338	0.886148	0.907241	0.901885	0.915342	0.999932	0.987566	1	0.727962	0.716563	0.582587	0.932182	0.914483	0.999441	0.255366	0.614619	0.242641	0.679092	0.995606	0.730134	0.879639	0.956884	0.547189
2210016L21Rik	0.266225	0.68092	0.10929	0.73127	0.0276084	0.695256	0.568171	0.922239	0.951729	0.468029	0.997582	0.953233	0.997331	0.925886	0.018877	0.581268	0.0992873	0.366825	0.339009	0.567657	0.96198	0.330851	0.858946	0.241038	0.998622	0.809781	0.968564	0.992846	0.443616	0.648291	0.8729	0.999932	0.955476	1	0.275773	0.369368	0.572566	0.744347	0.721684	0.999441	0.0273051	0.911472	0.535457	0.426166	0.995606	0.847262	0.173271	0.764055	0.894206
Zfp787	0.899299	0.212698	0.990679	0.511207	0.460809	0.0610842	0.650377	0.993268	0.804497	0.996625	0.997582	0.961316	0.997331	0.940065	0.888774	0.397536	0.0760884	0.22257	0.300023	0.0378415	0.521899	0.963172	0.769372	0.200933	0.998622	0.79552	0.792398	0.854496	0.637433	0.0660858	0.873198	0.999932	0.593767	1	0.267827	0.00516342	0.540191	0.744347	0.0878904	0.999441	0.616613	0.517056	0.325797	0.842597	0.995453	0.771469	0.768125	0.942572	0.26524
Med8	0.28896	0.0293387	0.230788	0.679241	0.476254	0.261754	0.10316	0.922239	0.380392	0.610413	0.997582	0.965358	0.997331	0.901424	0.474034	0.326394	0.386752	0.920748	0.136905	0.709053	0.0236154	0.76169	0.729113	0.562243	0.998622	0.695259	0.981634	0.365989	0.859446	0.037674	0.45031	0.999932	0.473583	1	0.500561	0.674462	0.107312	0.834944	0.893002	0.999441	0.162322	0.460811	0.119876	0.600462	0.990195	0.621502	0.521496	0.836758	0.274632
Cdpf1	0.279998	0.343476	0.585932	0.631338	0.394908	0.376626	0.785851	0.922239	0.871672	0.821501	0.997582	0.953233	0.997331	0.962985	0.223673	0.497852	0.434476	0.388592	0.200902	0.698752	0.595854	0.616299	0.827269	0.607213	0.998622	0.743348	0.98123	0.889334	0.150091	0.147393	0.552187	0.999932	0.753233	1	0.035718	0.459528	0.271921	0.521514	0.781489	0.999441	0.874519	0.979688	0.910153	0.957349	0.997528	0.97679	0.68317	0.912379	0.344875
Ces2g	0.885209	0.394347	0.368178	0.336975	0.954303	0.517231	0.624239	0.993268	0.883019	0.700065	0.997582	0.999856	0.997331	0.934426	0.95271	0.900695	0.00605812	0.773569	0.835174	0.956849	0.683311	0.985365	0.988273	0.0323375	0.998622	0.970175	0.998116	0.916743	0.923211	0.343802	0.361485	0.999932	0.86485	1	0.690397	0.0667126	0.674484	0.915463	0.372671	0.999441	0.915133	0.90921	0.733085	0.96373	0.995606	0.918942	0.726995	0.922949	0.654461
Lysmd2	0.637627	0.21365	0.595352	0.818333	0.422603	0.788809	0.940578	0.958171	0.804497	0.825316	0.997582	0.955323	0.997331	0.992578	0.712844	0.142695	0.14806	0.786038	0.143436	0.539753	0.460285	0.89061	0.553158	0.313107	0.998622	0.696275	0.965098	0.828237	0.883582	0.471419	0.919208	0.999932	0.925959	1	0.348028	0.271119	0.240359	0.758563	0.66642	0.999441	0.36984	0.256412	0.82928	0.730665	0.990195	0.953402	0.800576	0.942998	0.966519
Faf2	0.872931	0.721741	0.550627	0.257009	0.463999	0.742996	0.188724	0.993268	0.966018	0.806717	0.997582	0.961316	0.997331	0.901424	0.604763	0.643917	0.0110502	0.321232	0.880232	0.54661	0.0727803	0.826933	0.887878	0.0508926	0.998622	0.98467	0.965536	0.516924	0.527557	0.577758	0.943741	0.999932	0.933817	1	0.714444	0.258066	0.484351	0.927761	0.657113	0.999441	0.715027	0.984564	0.121421	0.905078	0.997528	0.6235	0.823433	0.947306	0.28109
Kalrn	0.0860764	0.0598542	0.758062	0.82524	0.114667	0.312664	0.293493	0.922239	0.524962	0.914099	0.997582	0.953233	0.997331	0.901424	0.000609602	0.559178	0.132972	0.376554	0.944217	0.704592	0.551982	0.130233	0.850711	0.291445	0.998622	0.995166	0.981634	0.870398	0.800944	0.0469517	0.590049	0.999932	0.514209	1	0.00651594	0.795278	0.783192	0.428741	0.949725	0.999441	0.034031	0.517939	0.353219	0.432389	0.995453	0.783128	0.873309	0.956884	0.0676103
Asnsd1	0.532493	0.854225	0.93297	0.295555	0.433953	0.745597	0.636359	0.947805	0.987825	0.975444	0.997582	0.955323	0.997331	0.937141	0.575901	0.741703	0.501996	0.899219	0.783761	0.988657	0.694123	0.811614	0.9236	0.667528	0.998622	0.957672	0.99947	0.921298	0.350433	0.758629	0.316749	0.999932	0.986918	1	0.550324	0.845957	0.873938	0.846464	0.965457	0.999441	0.866962	0.867476	0.699258	0.955996	0.995606	0.908723	0.773163	0.942998	0.588643
Abhd17c	0.347354	0.292993	0.341934	0.574874	0.202278	0.973983	0.691518	0.922239	0.850284	0.687971	0.997582	0.953233	0.997331	0.946156	0.436587	0.942032	0.93381	0.86206	0.0838531	0.338908	0.305936	0.738513	0.999044	0.967361	0.998622	0.630688	0.955487	0.765498	0.891804	0.457867	0.908796	0.999932	0.9232	1	0.537492	0.662581	0.516272	0.841709	0.886082	0.999441	0.0796127	0.366195	0.429066	0.507146	0.990195	0.806486	0.794411	0.942998	0.992388
Chmp5	0.0860873	0.101755	0.102132	0.0682089	0.0538976	0.045098	0.0532669	0.922239	0.650157	0.458371	0.997582	0.953233	0.997331	0.901424	0.0766572	0.0940585	0.130042	0.0518078	0.0628922	0.0514029	0.0549837	0.484585	0.458514	0.287757	0.998622	0.608905	0.818962	0.473736	0.715419	0.192564	0.808875	0.999932	0.809773	1	0.598429	0.742989	0.996728	0.867571	0.928499	0.999441	0.0973056	0.0794604	0.0845238	0.526208	0.927656	0.575497	0.0868999	0.741388	0.662968
Vsig2	0.081116	0.702707	0.347425	0.211297	0.0508337	0.991625	0.255541	0.922239	0.960475	0.690589	0.997582	0.953233	0.999056	0.901424	0.0300166	0.228597	0.00131648	0.687503	0.0789554	0.21029	0.0458652	0.375746	0.665266	0.0101517	0.998622	0.628886	0.955487	0.446868	0.952887	0.68436	0.861244	0.999932	0.96533	1	0.654863	0.0872753	0.221783	0.893954	0.424451	0.999441	0.0273219	0.754375	0.133345	0.426166	0.995606	0.63513	0.913598	0.964755	0.324904
Slc45a3	0.834024	0.012754	0.872265	0.813033	0.87482	0.307915	0.340208	0.990768	0.239775	0.958694	0.997582	0.994474	0.997331	0.901424	0.298412	0.0687475	0.317774	0.115091	0.241254	0.901772	0.838857	0.662199	0.390926	0.504318	0.998622	0.761768	0.995731	0.96232	0.690278	0.0126499	0.602706	0.999932	0.281714	1	0.0746418	0.0483885	0.0692901	0.608536	0.323292	0.999441	0.932008	0.3483	0.434703	0.969667	0.990195	0.807276	0.363808	0.772425	0.308753
Vps36	0.543579	0.657348	0.741472	0.23008	0.528725	0.831776	0.874401	0.947805	0.946641	0.906667	0.997582	0.968789	0.997331	0.982995	0.177782	0.784608	0.071225	0.503642	0.845885	0.825114	0.582162	0.582089	0.938693	0.191509	0.998622	0.974301	0.986702	0.883953	0.99922	0.697223	0.478332	0.999932	0.969151	1	0.340644	0.706067	0.926821	0.754702	0.909559	0.999441	0.325662	0.880846	0.293419	0.715939	0.995606	0.75516	0.548796	0.85472	0.74354
Rep15	0.130955	0.474004	0.180228	0.626604	0.0568592	0.728127	0.951224	0.922239	0.9143	0.57069	0.997582	0.953233	0.997331	0.992892	0.0190242	0.15045	0.0138155	0.639844	0.234982	0.387682	0.962101	0.330851	0.564789	0.0599286	0.998622	0.761681	0.955487	0.992846	0.733138	0.384927	0.621399	0.999932	0.87909	1	0.188372	0.0331919	0.703409	0.697995	0.260762	0.999441	0.057055	0.908039	0.827734	0.466947	0.995606	0.952795	0.603133	0.892327	0.863986
2210418O10Rik	0.852755	0.94781	0.963394	0.520535	0.454822	0.745709	0.649161	0.992312	0.993072	0.985301	0.997582	0.961316	0.997331	0.940065	0.472623	0.86263	0.0010229	0.370904	0.0785898	0.84348	0.436924	0.760858	0.974606	0.00828902	0.998622	0.628886	0.989025	0.816194	0.703423	0.824528	0.397862	0.999932	0.987566	1	0.0291366	0.52102	0.120751	0.50421	0.812383	0.999441	0.521312	0.747181	0.934491	0.795049	0.995606	0.984563	0.496247	0.81816	0.949502
Apol7c	0.99979	0.583501	0.0645109	0.906155	0.767368	0.838531	0.126468	0.99979	0.932967	0.378392	0.997582	0.981399	0.997331	0.901424	0.182981	0.868819	0.855223	0.812015	0.112534	0.97719	0.215768	0.585825	0.977227	0.921175	0.998622	0.668236	0.998638	0.693076	0.865079	0.590601	0.275456	0.999932	0.938981	1	0.043868	0.793827	0.534188	0.5467	0.949078	0.999441	0.843058	0.804592	0.289409	0.948777	0.995606	0.754163	0.112362	0.741388	0.982775
Trnp1	0.291303	0.187583	0.148281	0.277786	0.276885	0.27659	0.300639	0.922239	0.783754	0.534533	0.997582	0.953233	0.997331	0.901424	0.157883	0.131417	0.930526	0.165814	0.890213	0.823128	0.89984	0.571328	0.533845	0.965553	0.998622	0.987602	0.986443	0.97798	0.703519	0.142061	0.680988	0.999932	0.744514	1	0.319775	0.337374	0.354314	0.747787	0.706123	0.999441	0.325452	0.241728	0.319322	0.715928	0.990195	0.766695	0.262825	0.772425	0.188974
Jsrp1	0.739645	0.913501	0.67841	0.603089	0.162644	0.282559	0.0857059	0.979885	0.991833	0.872032	0.997582	0.953233	0.997331	0.901424	0.172157	0.286311	0.160938	0.850597	0.754487	0.921911	0.0190076	0.580652	0.710673	0.328588	0.998622	0.95141	0.996665	0.337754	0.50049	0.408623	0.446431	0.999932	0.893645	1	0.511961	0.405308	0.100093	0.834944	0.744235	0.999441	0.198089	0.484106	0.0969767	0.638458	0.992988	0.591981	0.362353	0.772425	0.06799
Asprv1	0.534659	0.908356	0.969693	0.804175	0.753106	0.340321	0.636918	0.947805	0.991833	0.986697	0.997582	0.980091	0.997331	0.937222	0.107356	0.562632	0.769795	0.721569	0.542835	0.0794945	0.287021	0.521355	0.851704	0.868156	0.998622	0.879092	0.887468	0.759553	0.814474	0.586438	0.881661	0.999932	0.936827	1	0.100552	0.0817677	0.297295	0.631727	0.412615	0.999441	0.514595	0.427987	0.613669	0.795049	0.990195	0.880493	0.39299	0.772425	0.584682
2300008B03Rik	0.207192	0.0396781	0.419159	0.29491	0.118312	0.772481	0.658546	0.922239	0.445077	0.727171	0.997582	0.953233	0.997331	0.940065	0.0635089	0.000144925	0.00236194	0.982792	0.392397	0.173297	0.151317	0.466251	0.00577242	0.0158248	0.999529	0.830868	0.955487	0.63452	0.799764	0.201135	0.620628	0.999932	0.817589	1	0.593158	0.000460837	0.30796	0.865277	0.0176736	0.999441	0.0590834	0.142256	0.324043	0.469305	0.990195	0.769263	0.93361	0.97288	0.594358
Apmap	0.114019	0.00116493	9.54e-05	0.836412	0.0858498	0.260752	0.109817	0.922239	0.0417952	0.00874831	0.997582	0.953233	0.997331	0.901424	0.255559	0.00182167	3.82436e-07	0.958075	0.0937839	0.209961	0.254187	0.639215	0.0401482	1.39337e-05	0.998895	0.642995	0.955487	0.733097	0.68702	0.0521168	0.114038	0.999932	0.537371	1	0.545553	0.259332	0.415749	0.845601	0.65874	0.999441	0.0522009	0.0245194	0.356654	0.457204	0.619946	0.783404	0.00379479	0.423452	0.910303
Gpatch11	0.882736	0.888868	0.895764	0.97777	0.722798	0.359165	0.914896	0.993268	0.991762	0.965728	0.997582	0.977609	0.997331	0.987385	0.196276	0.22526	0.537674	0.488346	0.111195	0.945569	0.53432	0.59147	0.660975	0.696799	0.998622	0.667852	0.996665	0.861661	0.89728	0.462084	0.921804	0.999932	0.923312	1	0.0162487	0.326998	0.313503	0.451514	0.698289	0.999441	0.727361	0.578077	0.957428	0.911074	0.995606	0.988583	0.677467	0.912379	0.534725
2310002L09Rik	0.1499	0.907898	0.146928	0.287784	0.0560858	0.483329	0.0938077	0.922239	0.991833	0.532718	0.997582	0.953233	0.997331	0.901424	0.262043	0.376612	0.789261	0.599915	0.0379742	0.908492	0.00436344	0.641829	0.759852	0.881696	0.998622	0.540027	0.996621	0.239344	0.800582	0.654731	0.736928	0.999932	0.95784	1	0.50691	0.724796	0.0471659	0.834944	0.918557	0.999441	0.0137939	0.557193	0.0364693	0.379273	0.995606	0.472169	0.365413	0.772425	0.178641
Gid8	0.0641172	0.0680544	0.602985	0.100079	0.738875	0.621944	0.192891	0.922239	0.559677	0.828946	0.997582	0.979323	0.997331	0.901424	0.00181546	0.128863	0.060687	0.239381	0.665644	0.742854	0.014584	0.187648	0.527198	0.171103	0.998622	0.921103	0.981634	0.323611	0.276432	0.137929	0.769176	0.999932	0.739776	1	0.00649853	0.411343	0.346671	0.428741	0.747644	0.999441	0.103539	0.290229	0.0245223	0.531622	0.990195	0.439922	0.17933	0.764055	0.58773
Hypk	0.638239	0.844719	0.219296	0.0236233	0.127244	0.467769	0.0614821	0.958587	0.986183	0.603887	0.997582	0.953233	0.997331	0.901424	0.0117702	0.131678	0.304836	0.0648152	0.586142	0.0348162	0.0174463	0.308457	0.534153	0.493071	0.998622	0.89942	0.783411	0.332413	0.516773	0.618519	0.685963	0.999932	0.947074	1	0.0483817	0.0221075	0.765677	0.554895	0.209225	0.999441	0.127278	0.623219	0.00442322	0.565609	0.995606	0.386631	0.631186	0.908432	0.557867
Faap100	0.401041	0.734895	0.185075	0.698292	0.431558	0.576296	0.723633	0.923029	0.969818	0.575351	0.997582	0.955323	0.997331	0.953068	0.119557	0.414242	0.355863	0.86032	0.170123	0.859649	0.95269	0.53551	0.781119	0.536137	0.998622	0.717565	0.991497	0.990191	0.949596	0.60456	0.680144	0.999932	0.942719	1	0.88032	0.545044	0.917546	0.978544	0.823318	0.999441	0.0664777	0.802808	0.994815	0.480791	0.995606	0.997584	0.557429	0.861778	0.170743
Ndufaf5	0.987926	0.884857	0.651917	0.447345	0.85661	0.559997	0.222215	0.998679	0.991669	0.856608	0.997582	0.992504	0.997331	0.901424	0.690774	0.485337	0.947355	0.508266	0.482687	0.942116	0.154067	0.880087	0.819411	0.973313	0.998622	0.858083	0.996665	0.635746	0.927816	0.801354	0.80188	0.999932	0.987566	1	0.517655	0.620752	0.65661	0.836633	0.860375	0.999441	0.88483	0.557403	0.125856	0.957627	0.995606	0.630353	0.661604	0.912379	0.920757
Tmem127	0.107349	0.974459	0.0716598	0.177377	0.265743	0.961633	0.883145	0.922239	0.995984	0.395771	0.997582	0.953233	0.997331	0.983393	0.133263	0.0924808	0.968749	0.106662	0.199137	0.1408	0.865028	0.543714	0.456575	0.984671	0.998622	0.741048	0.946526	0.968894	0.659864	0.915451	0.355283	0.999932	0.987566	1	0.993213	0.0140992	0.215945	0.997672	0.160383	0.999441	0.0839291	0.960674	0.342544	0.513744	0.996317	0.780632	0.714211	0.919073	0.728371
Adprm	0.473622	0.05052	0.354905	0.108796	0.00796792	0.376675	0.628005	0.94577	0.495183	0.694531	0.997582	0.953233	0.997331	0.93465	0.0406482	0.0252366	0.0254947	0.815714	0.0814225	0.28562	0.391996	0.421737	0.23214	0.094053	0.998622	0.628886	0.955487	0.797656	0.176355	0.500274	0.161324	0.999932	0.930887	1	0.866742	0.469591	0.733435	0.9772	0.786075	0.999441	0.0132663	0.0563066	0.4128	0.377727	0.859293	0.802001	0.67184	0.912379	0.261341
Dmac2	0.112037	0.507308	0.855984	0.343627	0.797827	0.284451	0.270869	0.922239	0.921149	0.951919	0.997582	0.986063	0.997331	0.901424	0.101793	0.93265	0.222848	0.177927	0.755604	0.652853	0.376458	0.519752	0.997734	0.4062	0.998622	0.95141	0.975085	0.793254	0.222533	0.130048	0.926635	0.999932	0.735723	1	0.150474	0.666075	0.555487	0.663279	0.887975	0.999441	0.285019	0.770309	0.248283	0.691408	0.995606	0.731238	0.147124	0.760681	0.424897
Akr1b10	0.31035	0.211163	0.342405	0.148268	0.197624	0.460151	0.213748	0.922239	0.803942	0.687971	0.997582	0.953233	0.997331	0.901424	0.262786	0.249212	1.15494e-05	0.141943	0.0122808	0.635057	0.0111079	0.642056	0.682883	0.000232593	0.998622	0.387382	0.972637	0.294043	0.863285	0.24735	0.835958	0.999932	0.858964	1	0.122777	0.0906751	0.361382	0.651025	0.433359	0.999441	0.0535941	0.730932	0.0302038	0.460723	0.995606	0.460894	0.509807	0.829114	0.264227
Meaf6	0.5542	0.0194712	0.690737	0.2242	0.118637	0.029874	0.205398	0.947805	0.307735	0.878611	0.997582	0.953233	0.997331	0.901424	0.37595	0.430321	0.0689353	0.169097	0.0864432	0.588853	0.18161	0.695792	0.790034	0.187173	0.998622	0.632924	0.968564	0.66633	0.440847	0.00396715	0.949198	0.999932	0.143951	1	0.52642	0.401157	0.817047	0.837751	0.741982	0.999441	0.128905	0.965801	0.101494	0.567039	0.99683	0.596076	0.404114	0.772425	0.994735
Cox20	0.839361	0.899669	0.564835	0.256507	0.968893	0.201137	0.945501	0.990768	0.991833	0.812009	0.997582	0.999856	0.997331	0.992642	0.291543	0.920184	0.821473	0.410119	0.373668	0.154398	0.690719	0.658964	0.994331	0.901664	0.998622	0.824918	0.946526	0.920152	0.873317	0.336214	0.44302	0.999932	0.863455	1	0.16671	0.237435	0.695763	0.670464	0.639641	0.999441	0.899443	0.392675	0.421857	0.960541	0.990195	0.804483	0.723898	0.921397	0.407158
Coq9	0.856693	0.899985	0.54927	0.524661	0.685532	0.700683	0.287056	0.993268	0.991833	0.806367	0.997582	0.977609	0.997331	0.901424	0.435882	0.907112	0.000518052	0.283274	0.886211	0.471215	0.164817	0.738047	0.9904	0.0048167	0.998622	0.986779	0.957632	0.647061	0.90381	0.787644	0.83408	0.999932	0.987566	1	0.640614	0.49294	0.880893	0.886481	0.800495	0.999441	0.534526	0.75824	0.0829027	0.797044	0.995606	0.573354	0.899537	0.959519	0.50779
Eepd1	0.999365	0.874614	0.0756523	0.929748	0.316581	0.0461498	0.755425	0.99979	0.990553	0.403119	0.997582	0.953233	0.997331	0.958229	0.401986	0.077561	0.339858	0.667071	0.061368	0.00119142	0.606492	0.713299	0.414954	0.523545	0.998622	0.605945	0.149325	0.893078	0.48215	0.117243	0.765388	0.999932	0.717894	1	0.0938412	0.00160473	0.561578	0.622467	0.0415374	0.999441	0.494997	0.214015	0.881508	0.794754	0.990195	0.967868	0.129259	0.741388	0.53464
2310006J04Rik	0.710188	0.844593	0.379481	0.575285	0.552993	0.193537	0.809479	0.976132	0.986183	0.704278	0.997582	0.970444	0.997331	0.968586	0.303094	0.179007	0.406022	0.359386	0.926458	0.962967	0.92454	0.665518	0.59914	0.579679	0.998622	0.991951	0.998116	0.980027	0.87512	0.301427	0.813295	0.999932	0.858964	1	0.433632	0.304759	0.444519	0.806221	0.684688	0.999441	0.509512	0.418301	0.607262	0.794849	0.990195	0.878436	0.125112	0.741388	0.994576
Riiad1	0.133668	0.232993	0.783036	0.231487	0.975894	0.984452	0.958001	0.922239	0.81335	0.926158	0.997582	0.999856	0.998939	0.993733	0.900429	0.161918	0.929813	0.970625	0.196871	0.937347	0.259905	0.96775	0.580262	0.96492	0.998895	0.737826	0.996665	0.739368	0.304024	0.365527	0.355571	0.999932	0.873844	1	0.352559	0.32378	0.406247	0.758563	0.696006	0.999441	0.282683	0.449061	0.453139	0.691408	0.990195	0.808759	0.554014	0.858836	0.532039
Aagab	0.0526831	0.957533	0.209355	0.251095	0.378987	0.914732	0.110925	0.922239	0.993257	0.596344	0.997582	0.953233	0.997331	0.901424	0.245879	0.177057	0.232066	0.138145	0.0803178	0.217712	0.181267	0.632059	0.59723	0.416381	0.998622	0.628886	0.955487	0.66585	0.459335	0.986484	0.827767	0.999932	0.997393	1	0.72269	0.15932	0.800181	0.930574	0.542823	0.999441	0.0242408	0.858129	0.0252582	0.424825	0.995606	0.439922	0.386199	0.772425	0.740911
Spidr	0.607199	0.55858	0.830815	0.973217	0.665172	0.644034	0.832913	0.949732	0.929315	0.946396	0.997582	0.977609	0.997331	0.976402	0.735469	0.636058	0.594265	0.531029	0.160408	0.126216	0.328063	0.902011	0.883361	0.739782	0.998622	0.712494	0.932725	0.776578	0.922877	0.899936	0.903685	0.999932	0.987566	1	0.144934	0.13352	0.145755	0.657456	0.51324	0.999441	0.507058	0.43569	0.859343	0.794754	0.990195	0.964716	0.413648	0.772425	0.999527
Knop1	0.257486	0.184357	0.366956	0.123734	0.195327	0.203087	0.0784336	0.922239	0.777597	0.699598	0.997582	0.953233	0.997331	0.901424	0.285693	0.323362	0.237579	0.138284	0.13594	0.143466	0.0821946	0.655483	0.726783	0.422106	0.998622	0.695259	0.946526	0.534414	0.978336	0.18472	0.663784	0.999932	0.808609	1	0.40978	0.319579	0.861079	0.789804	0.692409	0.999441	0.270118	0.210915	0.118736	0.685898	0.990195	0.621502	0.463766	0.795369	0.0966885
Ostc	0.700624	0.724558	0.885695	0.0858613	0.428318	0.47766	0.143439	0.972514	0.966676	0.96374	0.997582	0.955323	0.997331	0.901424	0.880455	0.159965	0.0207912	0.438136	0.429618	0.432092	0.0417562	0.961426	0.578129	0.0803608	0.998622	0.843298	0.955487	0.430382	0.782119	0.35963	0.74738	0.999932	0.869267	1	0.604884	0.152173	0.392023	0.870024	0.538403	0.999441	0.488814	0.819572	0.0652575	0.794754	0.995606	0.541961	0.472285	0.799554	0.287167
Zfand1	0.849245	0.583145	0.0203242	0.918318	0.616079	0.846115	0.648604	0.992312	0.932739	0.214419	0.997582	0.976655	0.997331	0.940065	0.14692	0.118576	0.0297658	0.960744	0.434515	0.488932	0.481566	0.559824	0.508494	0.104794	0.998895	0.84384	0.959141	0.839097	0.860353	0.850571	0.854252	0.999932	0.987566	1	0.240717	0.208173	0.658286	0.73654	0.606323	0.999441	0.368215	0.399104	0.482582	0.730665	0.990195	0.821678	0.205233	0.768178	0.536347
Fggy	0.0637603	0.145143	0.240316	0.267727	0.518823	0.995481	0.61668	0.922239	0.73211	0.614536	0.997582	0.968789	0.999056	0.93283	0.633194	0.0492882	0.304606	0.819941	0.605136	0.666491	0.725131	0.844738	0.326044	0.492822	0.998622	0.902901	0.976925	0.927636	0.103516	0.286476	0.269177	0.999932	0.858964	1	0.870604	0.129153	0.92214	0.977742	0.507285	0.999441	0.353016	0.307175	0.683147	0.728356	0.990195	0.907085	0.361697	0.772425	0.575253
Mapk1ip1	0.705245	0.131872	0.00144196	0.519712	0.0723769	0.537246	0.790827	0.973467	0.708463	0.0494688	0.997582	0.953233	0.997331	0.963197	0.103562	0.175285	4.47894e-05	0.217651	0.619654	0.0574971	0.859168	0.521355	0.594188	0.000691331	0.998622	0.905791	0.839243	0.968717	0.385511	0.130236	0.797714	0.999932	0.735723	1	0.463477	0.0478314	0.349215	0.823032	0.322168	0.999441	0.116274	0.457961	0.529245	0.549241	0.990195	0.845568	0.390923	0.772425	0.513792
Slc66a2	0.947793	0.638839	0.522323	0.175428	0.181168	0.700825	0.591295	0.995432	0.944124	0.79306	0.997582	0.953233	0.997331	0.928766	0.0843498	0.958374	0.3045	0.12421	0.886025	0.861806	0.305947	0.49756	0.999044	0.492735	0.998622	0.986779	0.991631	0.765498	0.420181	0.562899	0.578929	0.999932	0.933345	1	0.192963	0.910322	0.632486	0.702779	0.976972	0.999441	0.26307	0.918151	0.107483	0.683197	0.995606	0.603066	0.747122	0.932319	0.167435
Fastkd3	0.280244	0.4513	0.889833	0.811514	0.325848	0.269108	0.961556	0.922239	0.907426	0.96438	0.997582	0.953233	0.997331	0.995296	0.593927	0.0889782	0.549744	0.554691	0.654291	0.537265	0.689858	0.821862	0.448229	0.706631	0.998622	0.915228	0.965098	0.919815	0.153583	0.865479	0.846787	0.999932	0.987566	1	0.326651	0.339705	0.375598	0.751548	0.707156	0.999441	0.951303	0.202717	0.916643	0.978055	0.990195	0.978999	0.290247	0.772425	0.0878646
Mfsd3	0.704556	0.339182	0.122118	0.7102	0.827149	0.716445	0.957823	0.973323	0.868154	0.4884	0.997582	0.989604	0.997331	0.993733	0.271082	0.98302	0.0593186	0.945218	0.641613	0.555489	0.675052	0.646466	0.999044	0.168812	0.998895	0.911542	0.965957	0.914228	0.881762	0.413819	0.79371	0.999932	0.894861	1	0.311747	0.730611	0.747882	0.744572	0.920939	0.999441	0.631191	0.610115	0.78456	0.853709	0.995606	0.932222	0.39437	0.772425	0.655074
2310011J03Rik	0.389907	0.145102	0.370012	0.810761	0.277234	0.820589	0.187241	0.923029	0.73211	0.700978	0.997582	0.953233	0.997331	0.901424	0.881125	0.0289745	0.808033	0.91407	0.528644	0.935513	0.193446	0.961848	0.251859	0.893342	0.998622	0.872871	0.996665	0.676173	0.254783	0.392306	0.339125	0.999932	0.881609	1	0.708981	0.0844914	0.383741	0.925735	0.420488	0.999441	0.877588	0.164882	0.347307	0.957349	0.990195	0.782378	0.150473	0.764055	0.791298
Stimate	0.193455	0.495633	0.350459	0.162129	0.342108	0.243273	0.0346156	0.922239	0.917454	0.69367	0.997582	0.953233	0.997331	0.901424	0.144384	0.00584102	0.015678	0.139933	0.338522	0.646839	0.0130724	0.556443	0.0940165	0.0653828	0.998622	0.809278	0.974689	0.314252	0.780255	0.723575	0.655152	0.999932	0.978189	1	0.751933	0.0182266	0.469973	0.945804	0.185745	0.999441	0.117993	0.202649	0.0196761	0.551701	0.990195	0.415227	0.168474	0.764055	0.229721
Ccdc90b	0.516468	0.744787	0.232118	0.288127	0.375985	0.840936	0.364052	0.947805	0.971497	0.610834	0.997582	0.953233	0.997331	0.901424	0.085309	0.298018	0.511221	0.338131	0.664486	0.575323	0.398031	0.499318	0.717932	0.67603	0.998622	0.920822	0.968564	0.799635	0.854944	0.939095	0.855066	0.999932	0.988291	1	0.140883	0.234051	0.879984	0.657456	0.636154	0.999441	0.34126	0.784288	0.240362	0.724817	0.995606	0.728867	0.851401	0.956884	0.643346
Rftn1	0.50032	0.310705	0.157525	0.956356	0.694289	0.447037	0.839769	0.947805	0.859502	0.546019	0.997582	0.977609	0.997331	0.977551	0.187344	0.678775	0.369108	0.93603	0.819293	0.777485	0.958035	0.588195	0.901843	0.548314	0.998622	0.966095	0.983221	0.991799	0.83945	0.159856	0.827103	0.999932	0.776797	1	0.216194	0.522465	0.970154	0.72313	0.812886	0.999441	0.496452	0.914677	0.93038	0.794754	0.995606	0.982782	0.159969	0.764055	0.55787
Cmbl	0.445522	0.328244	0.273111	0.27194	0.371741	0.975657	0.166569	0.941571	0.864227	0.646009	0.997582	0.953233	0.997331	0.901424	0.119492	0.116247	0.00112159	0.15084	0.894987	0.737839	0.171155	0.53551	0.505507	0.0089651	0.998622	0.988132	0.981634	0.653988	0.907783	0.454269	0.870008	0.999932	0.921703	1	0.260233	0.123995	0.885564	0.744347	0.498518	0.999441	0.268209	0.586163	0.119622	0.684985	0.995606	0.621502	0.537298	0.850069	0.541062
Hilpda	0.644246	0.854492	0.0280003	0.457657	0.874294	0.0235354	0.831232	0.960583	0.987825	0.254303	0.997582	0.994278	0.997331	0.975992	0.170252	0.000273885	0.0895214	0.910989	0.812909	0.375972	0.40473	0.580188	0.00954949	0.224102	0.998622	0.965083	0.955487	0.801277	0.742497	0.183735	0.605501	0.999932	0.807915	1	0.133456	0.027674	0.612978	0.653859	0.236495	0.999441	0.677909	0.00692274	0.519395	0.881733	0.314232	0.840116	0.134548	0.741594	0.91847
Gpx8	0.764783	0.0910668	2.11e-08	0.821191	0.715568	0.0685447	0.566474	0.984016	0.627616	1.81e-05	0.997582	0.977609	0.997331	0.925886	0.92958	0.00759029	2.61862e-07	0.539503	0.979142	0.0991274	0.32536	0.978014	0.112007	1.04745e-05	0.998622	0.998173	0.899663	0.774437	0.529984	0.971935	0.505037	0.999932	0.995483	1	0.683016	0.448191	0.171345	0.910947	0.773702	0.999441	0.896334	0.0361113	0.831274	0.960138	0.706201	0.954037	0.000221	0.104	0.0281203
Ost4	0.833113	0.897221	0.219397	0.989013	0.254611	0.95762	0.951463	0.990768	0.991762	0.603887	0.998466	0.953233	0.997331	0.992892	0.877986	0.719155	0.000278664	0.625772	0.220753	0.728465	0.563898	0.96115	0.915624	0.00295982	0.998622	0.75344	0.981634	0.876612	0.549085	0.907773	0.902209	0.999932	0.987566	1	0.374984	0.349038	0.32147	0.763291	0.711811	0.999441	0.5147	0.673877	0.910711	0.795049	0.995606	0.977054	0.309599	0.772425	0.18917
Apol9b	0.490514	0.946278	0.507084	0.465845	0.651743	0.233738	0.904159	0.947805	0.993072	0.785485	0.997582	0.977609	0.997331	0.986409	0.477312	0.326282	0.0026034	0.595625	0.292649	0.314992	0.538708	0.764219	0.729102	0.0169604	0.998622	0.792888	0.955487	0.86414	0.841373	0.458693	0.639573	0.999932	0.92328	1	0.0622274	0.843378	0.586596	0.586514	0.964533	0.999441	0.442085	0.365105	0.558158	0.775801	0.990195	0.858992	0.326635	0.772425	0.997572
Dus2	0.971967	0.873731	0.177404	0.169276	0.957892	0.955359	0.144942	0.99773	0.990553	0.567982	0.997582	0.999856	0.997331	0.901424	0.590169	0.0988047	0.294416	0.010454	0.396673	0.739393	0.0135732	0.819463	0.46931	0.483658	0.998622	0.831727	0.981634	0.319028	0.9558	0.907517	0.153541	0.999932	0.987566	1	0.855846	0.398425	0.807313	0.977124	0.739245	0.999441	0.327345	0.196948	0.00178658	0.717369	0.990195	0.372674	0.385528	0.772425	0.432364
Cox14	0.502386	0.972736	0.272098	0.386173	0.356187	0.672942	0.517571	0.947805	0.995984	0.644755	0.997582	0.953233	0.997331	0.916112	0.717535	0.287592	0.000326332	0.384653	0.177764	0.81557	0.315912	0.892881	0.711564	0.0033761	0.998622	0.722556	0.985267	0.771382	0.886098	0.739018	0.854799	0.999932	0.983055	1	0.389885	0.462112	0.889483	0.772219	0.782626	0.999441	0.243496	0.805843	0.275724	0.676585	0.995606	0.744691	0.992757	0.996706	0.891987
Yipf7	0.256162	0.96099	0.261638	0.0501096	0.27496	0.873823	0.0272172	0.922239	0.994431	0.635494	0.997582	0.953233	0.997331	0.901424	0.264367	0.750412	0.226722	0.370501	0.304198	0.682148	0.00396783	0.642962	0.926277	0.410255	0.998622	0.797449	0.979422	0.239344	0.933674	0.948539	0.946703	0.999932	0.989276	1	0.915033	0.6876	0.238111	0.983067	0.899868	0.999441	0.0765992	0.89296	0.00238257	0.497599	0.995606	0.372674	0.351046	0.772425	0.305666
Rnf113a2	0.600454	0.549954	0.610426	0.185962	0.640827	0.0845383	0.716632	0.948456	0.929315	0.833141	0.997582	0.977609	0.997331	0.951726	0.498029	0.626621	0.519929	0.285261	0.0869378	0.0652126	0.546868	0.776492	0.879797	0.683065	0.998622	0.632924	0.860952	0.868631	0.916503	0.425803	0.414413	0.999932	0.901487	1	0.0705369	0.339127	0.563652	0.60051	0.707086	0.999441	0.55325	0.138862	0.288495	0.802218	0.990195	0.753189	0.280025	0.772425	0.799984
Iscu	0.0625291	0.131455	8.45e-05	0.113921	0.285133	0.0430594	0.700761	0.922239	0.708463	0.00833184	0.997582	0.953233	0.997331	0.950607	0.0346752	0.0103877	1.28296e-05	0.180531	0.536988	0.180234	0.481217	0.393127	0.137334	0.000253891	0.998622	0.87762	0.955487	0.839072	0.421742	0.840806	0.442817	0.999932	0.987566	1	0.24906	0.541395	0.737907	0.740575	0.820358	0.999441	0.0521087	0.0345349	0.373414	0.457204	0.689383	0.78583	0.00302597	0.388232	0.392277
Mtfmt	0.405323	0.838957	0.754217	0.679051	0.865973	0.857803	0.131684	0.925063	0.985535	0.912437	0.997582	0.993079	0.997331	0.901424	0.584027	0.433267	0.563194	0.397041	0.718681	0.406993	0.088022	0.815911	0.792356	0.716861	0.998622	0.941022	0.955487	0.54538	0.540538	0.806884	0.521963	0.999932	0.987566	1	0.85174	0.22662	0.548352	0.977124	0.628066	0.999441	0.567033	0.989147	0.0985096	0.811799	0.997863	0.592075	0.383783	0.772425	0.490747
Zswim8	0.535476	0.749421	0.430777	0.172913	0.857033	0.5144	0.297406	0.947805	0.973122	0.735007	0.997582	0.992504	0.997331	0.901424	0.987479	0.243473	0.895066	0.422377	0.476676	0.947672	0.127103	0.995529	0.681313	0.944289	0.998622	0.854536	0.9971	0.603919	0.748476	0.819172	0.770808	0.999932	0.987566	1	0.580503	0.404875	0.665235	0.858691	0.744235	0.999441	0.582396	0.49021	0.108416	0.8219	0.993316	0.606049	0.699717	0.912764	0.316274
2310022A10Rik	0.56434	0.936231	0.9536	0.575839	0.757053	0.769816	0.619401	0.947805	0.993072	0.981693	0.997582	0.980881	0.997331	0.93397	0.812986	0.523712	0.649597	0.604849	0.599097	0.835471	0.674976	0.936184	0.838374	0.783145	0.998622	0.900908	0.988474	0.914228	0.844248	0.882231	0.464623	0.999932	0.987566	1	0.794726	0.572973	0.537269	0.961159	0.838513	0.999441	0.532113	0.802902	0.985993	0.796607	0.995606	0.994155	0.82452	0.947569	0.567019
2310022B05Rik	0.0780838	0.607083	0.244841	0.474325	0.138056	0.785754	0.971198	0.922239	0.937056	0.621298	0.997582	0.953233	0.997331	0.99669	0.0151557	0.284128	0.0164923	0.821876	0.521938	0.177111	0.380543	0.324498	0.708726	0.0680542	0.998622	0.870183	0.955487	0.79549	0.737521	0.459524	0.543007	0.999932	0.923312	1	0.145029	0.0542679	0.309928	0.657456	0.334849	0.999441	0.0615554	0.805187	0.740379	0.472424	0.995606	0.921038	0.987377	0.994793	0.733395
Gpcpd1	0.252425	0.401789	0.976111	0.404666	0.369436	0.126948	0.243979	0.922239	0.88657	0.99012	0.997582	0.953233	0.997331	0.901424	0.0665242	0.552626	0.829134	0.837331	0.330998	0.120932	0.0189194	0.47208	0.847973	0.905468	0.998622	0.809244	0.924832	0.337009	0.871918	0.183847	0.888573	0.999932	0.807915	1	0.503158	0.161011	0.153085	0.834944	0.545059	0.999441	0.0639136	0.429618	0.068336	0.474161	0.990195	0.552061	0.623307	0.904166	0.681115
Ripor3	0.720358	0.020064	0.107273	0.487021	0.661029	0.128075	0.819648	0.978202	0.312123	0.464612	0.997582	0.977609	0.997331	0.972201	0.526127	0.0523944	2.76459e-07	0.459102	0.571669	0.136423	0.819357	0.79079	0.336642	1.10115e-05	0.998622	0.891455	0.946526	0.955535	0.360909	0.334898	0.362439	0.999932	0.863455	1	0.351747	0.309254	0.365677	0.758563	0.687229	0.999441	0.886596	0.0437396	0.814843	0.957849	0.773968	0.948514	0.40715	0.772425	NA
2310033P09Rik	0.705597	0.591446	0.390227	0.627872	0.194902	0.838264	0.240766	0.973666	0.934256	0.708371	0.997582	0.953233	0.997331	0.901424	0.549618	0.0140644	0.644409	0.56393	0.788443	0.0423462	0.213145	0.799635	0.164026	0.779192	0.998622	0.957672	0.793735	0.693076	0.217991	0.623757	0.642505	0.999932	0.947074	1	0.926457	0.000906683	0.619588	0.984932	0.0279318	0.999441	0.510073	0.879755	0.272441	0.795049	0.995606	0.742088	0.794298	0.942998	0.543826
Yipf4	0.254905	0.317569	0.291846	0.532179	0.560519	0.572908	0.89391	0.922239	0.864227	0.660094	0.997582	0.971438	0.997331	0.985006	0.230358	0.963043	0.0282936	0.251779	0.515878	0.13474	0.609506	0.619114	0.999044	0.101196	0.998622	0.867447	0.946526	0.894118	0.691249	0.754676	0.654058	0.999932	0.986696	1	0.723929	0.453594	0.320953	0.930766	0.777663	0.999441	0.123076	0.136021	0.661481	0.561409	0.990195	0.906545	0.999995	0.999995	0.558087
Relch	0.251968	0.24061	0.29909	0.149451	0.180853	0.155614	0.10988	0.922239	0.821498	0.66449	0.997582	0.953233	0.997331	0.901424	0.264035	0.30081	0.252405	0.177927	0.132918	0.154901	0.108402	0.64296	0.71828	0.439371	0.998622	0.695135	0.946526	0.576864	0.656996	0.472908	0.810078	0.999932	0.925959	1	0.382438	0.534525	0.728795	0.768311	0.818411	0.999441	0.258234	0.210948	0.150255	0.679549	0.990195	0.639398	0.611411	0.896961	0.0874244
Ap5s1	0.310525	0.619337	0.806496	0.177622	0.183021	0.849371	0.8158	0.922239	0.938997	0.9352	0.997582	0.953233	0.997331	0.970481	0.0980837	0.264916	0.00551726	0.349402	0.337551	0.891875	0.447079	0.515199	0.693957	0.030191	0.998622	0.809244	0.995068	0.823056	0.812206	0.844681	0.306922	0.999932	0.987566	1	0.366565	0.251529	0.714171	0.759531	0.651469	0.999441	0.170108	0.715938	0.357878	0.612209	0.995606	0.783987	0.6998	0.912764	0.241669
Tmem106b	0.651854	0.682983	0.310569	0.953194	0.258948	0.994552	0.776948	0.961872	0.952104	0.670826	0.997582	0.953233	0.999056	0.961635	0.314598	0.77677	0.882589	0.335341	0.798474	0.542211	0.550204	0.6724	0.936111	0.93691	0.998622	0.960785	0.965098	0.870398	0.538934	0.621462	0.820529	0.999932	0.947074	1	0.601267	0.51926	0.25229	0.868441	0.811532	0.999441	0.385675	0.792979	0.851608	0.737644	0.995606	0.960888	0.816885	0.945713	0.940182
Trir	0.409815	0.440949	0.304289	0.744976	0.2399	0.879244	0.191518	0.925294	0.903613	0.666596	0.997582	0.953233	0.997331	0.901424	0.832902	0.411377	0.537559	0.86169	0.0512377	0.728319	0.0642225	0.945411	0.778997	0.696799	0.998622	0.589358	0.981634	0.496049	0.835208	0.729748	0.574117	0.999932	0.980439	1	0.242504	0.844623	0.233546	0.737641	0.965384	0.999441	0.082891	0.464858	0.148089	0.511152	0.990195	0.638946	0.536169	0.848927	0.503325
Kansl2	0.188102	0.394695	0.361177	0.876401	0.222082	0.118773	0.511997	0.922239	0.883019	0.696452	0.997582	0.953233	0.997331	0.914964	0.602728	0.0148755	0.324695	0.648331	0.500114	0.799486	0.648553	0.825714	0.169902	0.509964	0.998622	0.861541	0.985168	0.906499	0.0838827	0.678451	0.714432	0.999932	0.962863	1	0.465838	0.0718375	0.986941	0.824196	0.38857	0.999441	0.953357	0.100865	0.589654	0.979136	0.986591	0.874073	0.0482295	0.741388	0.999632
Tmem158	0.985398	6.36e-06	0.965492	0.925838	0.00859779	0.696968	0.839632	0.998679	0.000515202	0.985786	0.997582	0.953233	0.997331	0.977551	0.0741542	0.000117415	0.000940673	0.993366	0.193478	0.031363	0.774905	0.47917	0.00483203	0.00773607	0.999946	0.735124	0.761789	0.943184	0.0648354	0.00429985	0.963863	0.999932	0.151579	1	0.916639	0.171132	0.888263	0.983067	0.561601	0.999441	0.0221898	0.000696814	0.798435	0.424825	0.0648244	0.940216	0.292352	0.772425	0.155372
Cavin4	0.48805	0.593253	0.421264	0.332949	0.0699037	0.520209	0.0309585	0.947805	0.934256	0.729261	0.997582	0.953233	0.997331	0.901424	0.300158	0.900466	0.342598	0.86341	0.14927	0.968107	0.00709701	0.663921	0.988137	0.525874	0.998622	0.702621	0.998526	0.266298	0.508474	0.410581	0.47168	0.999932	0.893697	1	0.82478	0.981729	0.131314	0.969795	0.995314	0.999441	0.0551175	0.96703	0.0176471	0.462397	0.99683	0.39912	0.381652	0.772425	0.0804433
2310039H08Rik	0.0778541	0.164776	0.678448	0.904169	0.353267	0.630811	0.445307	0.922239	0.759837	0.872032	0.997582	0.953233	0.997331	0.902322	0.23035	0.174384	0.582705	0.461405	0.215819	0.722799	0.824225	0.619114	0.592616	0.730999	0.998622	0.75034	0.981634	0.957217	0.435509	0.105456	0.568424	0.999932	0.695983	1	0.892972	0.204027	0.707655	0.980711	0.600199	0.999441	0.121103	0.642981	0.606927	0.558332	0.995606	0.878391	0.215469	0.772425	0.92314
Fam83g	0.252099	0.0693529	0.220907	0.394867	0.949862	0.300115	0.94948	0.922239	0.564422	0.605074	0.997582	0.999856	0.997331	0.992642	0.535729	0.0202173	0.606953	0.646379	0.803182	0.776593	0.800582	0.79388	0.203339	0.749719	0.998622	0.962385	0.983221	0.951628	0.349145	0.389715	0.372462	0.999932	0.880093	1	0.94251	0.107423	0.866438	0.98647	0.464462	0.999441	0.455743	0.120539	0.661841	0.785678	0.990195	0.906588	0.30758	0.772425	0.347139
Nudt16	0.393557	0.929562	0.00598737	0.57324	0.938128	0.0458331	0.941654	0.923029	0.992776	0.112468	0.997582	0.999856	0.997331	0.992578	0.887741	0.137103	0.681204	0.990015	0.2693	0.29296	0.509834	0.962889	0.544397	0.808232	0.999529	0.776465	0.955487	0.850584	0.745215	0.205398	0.695702	0.999932	0.82065	1	0.591218	0.570403	0.672764	0.864667	0.837947	0.999441	0.518327	0.164823	0.697042	0.795049	0.990195	0.908723	0.00588126	0.486037	0.639542
Perm1	0.306611	0.559896	0.213519	0.264084	0.375174	0.613059	0.21906	0.922239	0.929315	0.59895	0.997582	0.953233	0.997331	0.901424	0.343763	0.435486	0.658358	0.478641	0.393059	0.771927	0.149344	0.678789	0.794366	0.790567	0.998622	0.830868	0.983221	0.633783	0.90675	0.979014	0.985961	0.999932	0.996407	1	0.944374	0.775634	0.689539	0.986558	0.94212	0.999441	0.161967	0.440429	0.0928209	0.600462	0.990195	0.585725	0.3338	0.772425	0.456851
Prelid3b	0.647567	0.764025	0.0167233	0.717378	0.33372	0.500046	0.280244	0.96139	0.97752	0.19201	0.997582	0.953233	0.997331	0.901424	0.292313	0.906177	0.00116678	0.795613	0.51637	0.444012	0.0659035	0.659356	0.990242	0.00923989	0.998622	0.867818	0.955487	0.5017	0.77073	0.497476	0.659077	0.999932	0.930711	1	0.706318	0.388499	0.132224	0.923933	0.734953	0.999441	0.286529	0.789894	0.269696	0.691408	0.995606	0.742088	0.131915	0.741388	0.99578
Ccdc134	0.125725	0.254591	0.160597	0.989478	0.768416	0.79933	0.498334	0.922239	0.828335	0.549678	0.998621	0.981399	0.997331	0.913567	0.789574	0.409876	0.106205	0.215752	0.018007	0.257025	0.631512	0.927834	0.777721	0.252039	0.998622	0.434014	0.955487	0.90106	0.376253	0.506156	0.645894	0.999932	0.931186	1	0.0205292	0.530917	0.0807526	0.483281	0.816629	0.999441	0.211651	0.362542	0.626975	0.651279	0.990195	0.88765	0.741203	0.92899	0.214182
Tmem79	0.895663	0.144993	0.169252	0.806304	0.836919	0.246686	0.80129	0.993268	0.73211	0.563374	0.997582	0.992186	0.997331	0.966361	0.978919	0.0968965	0.32677	0.244125	0.82504	0.778963	0.00671732	0.993606	0.464441	0.511683	0.998622	0.968047	0.983492	0.263095	0.90293	0.178908	0.999286	0.999932	0.80603	1	0.961938	0.110681	0.11251	0.989134	0.472279	0.999441	0.958308	0.294224	0.0382419	0.98061	0.990195	0.478192	0.367505	0.772425	0.519713
Dusp26	0.0718123	0.327156	0.797746	0.79058	0.717996	0.985949	0.714926	0.922239	0.864227	0.932804	0.997582	0.977609	0.999056	0.951726	0.258526	0.816605	0.144827	0.987592	0.210878	0.987298	0.991159	0.640398	0.953423	0.308493	0.999529	0.748465	0.999209	0.997647	0.140522	0.480229	0.95479	0.999932	0.927117	1	0.220709	0.924801	0.950594	0.725738	0.98001	0.999441	0.301701	0.48656	0.657136	0.702047	0.992988	0.9032	0.648093	0.912379	0.919512
Ccdc82	0.742835	0.348288	0.104363	0.88397	0.151638	0.312017	0.442147	0.980265	0.872291	0.462087	0.997582	0.953233	0.997331	0.901424	0.780043	0.509439	0.336305	0.666821	0.205772	0.704352	0.276466	0.924566	0.831954	0.520288	0.998622	0.743375	0.981634	0.75395	0.221727	0.14031	0.507803	0.999932	0.740803	1	0.274361	0.554646	0.261481	0.744347	0.828983	0.999441	0.463922	0.971216	0.665815	0.790248	0.997528	0.906973	0.790763	0.942998	0.999026
Cipc	0.825001	0.624021	0.507695	0.507082	0.777648	0.293384	0.149656	0.98937	0.939754	0.785485	0.997582	0.983105	0.997331	0.901424	0.0850266	0.10936	0.0398581	0.207803	0.087354	0.279524	0.133463	0.498908	0.492093	0.128442	0.998622	0.632924	0.955487	0.613161	0.764904	0.320129	0.6348	0.999932	0.860248	1	0.0144139	0.0242494	0.829117	0.440137	0.221641	0.999441	0.976862	0.632336	0.110583	0.989712	0.995606	0.609155	0.198228	0.764055	0.382401
Emc10	0.201431	0.227361	0.614105	0.260551	0.955649	0.217421	0.192421	0.922239	0.810156	0.834941	0.997582	0.999856	0.997331	0.901424	0.318032	0.888038	0.573755	0.452476	0.527523	0.755708	0.0301275	0.6724	0.984847	0.725101	0.998622	0.872252	0.981634	0.39156	0.363058	0.108518	0.939633	0.999932	0.699488	1	0.660859	0.657325	0.231609	0.896763	0.882571	0.999441	0.374862	0.924886	0.089035	0.730899	0.995606	0.580952	0.09276	0.741388	0.40177
Sel1l3	0.057515	0.7754	0.0740294	0.401969	0.0759573	0.266655	0.0324879	0.922239	0.978525	0.400496	0.997582	0.953233	0.997331	0.901424	0.108894	0.00879887	0.312331	0.554465	0.0644734	0.104496	0.0228169	0.522065	0.123816	0.500118	0.998622	0.608961	0.904506	0.362743	0.850145	0.314106	0.396719	0.999932	0.858964	1	0.763606	0.0089805	0.30325	0.949681	0.122646	0.999441	0.0149358	0.569037	0.0363097	0.395315	0.995606	0.472169	0.0810203	0.741388	0.150448
Alkbh7	0.588605	0.649462	0.823394	0.850197	0.367314	0.880194	0.429796	0.948409	0.945347	0.942741	0.997582	0.953233	0.997331	0.901424	0.741172	0.312576	0.0387883	0.722249	0.226424	0.664344	0.650124	0.905277	0.725127	0.125988	0.998622	0.754887	0.976925	0.90661	0.804507	0.694603	0.492348	0.999932	0.968482	1	0.420128	0.319772	0.888111	0.797319	0.692459	0.999441	0.315475	0.874575	0.666008	0.711567	0.995606	0.906973	0.435004	0.777858	0.916516
Prss23	0.945971	0.614219	0.499159	0.896847	0.746257	0.810657	0.870385	0.995432	0.93783	0.780196	0.997582	0.979323	0.997331	0.982576	0.283546	0.758824	0.166759	0.913271	0.598384	0.650404	0.99526	0.654199	0.928288	0.336454	0.998622	0.900908	0.974887	0.997992	0.852804	0.855799	0.844115	0.999932	0.987566	1	0.164488	0.983406	0.946786	0.668817	0.995699	0.999441	0.751035	0.604739	0.973834	0.919354	0.995606	0.991671	0.701872	0.913202	0.996518
Slc52a3	0.0758519	0.0263523	0.365994	0.70911	0.435528	0.774117	0.96	0.922239	0.355138	0.698747	0.997582	0.955323	0.997331	0.994599	0.0977006	0.000749968	0.00244609	0.535629	0.223451	0.391143	0.83232	0.515063	0.0207161	0.0161243	0.998622	0.753793	0.955487	0.96033	0.414544	0.167716	0.782203	0.999932	0.788631	1	0.544422	0.00654612	0.609477	0.845601	0.100338	0.999441	0.0793612	0.0642116	0.821046	0.506231	0.893282	0.951236	0.958382	0.982039	0.860515
Epsti1	0.683021	0.714063	0.764475	0.921381	0.889688	0.920622	0.757697	0.971442	0.964652	0.916202	0.997582	0.998041	0.997331	0.958676	0.236073	0.847021	0.297948	0.603729	0.504906	0.513104	0.769869	0.623036	0.968377	0.486835	0.998622	0.863691	0.964094	0.942918	0.807692	0.817627	0.75072	0.999932	0.987566	1	0.131014	0.467191	0.464552	0.653427	0.784776	0.999441	0.747677	0.77234	0.889298	0.917529	0.995606	0.968901	0.745023	0.931362	0.974298
Fam219b	0.322027	0.283186	0.321169	0.342209	0.366445	0.362	0.489614	0.922239	0.846457	0.679436	0.997582	0.953233	0.997331	0.911678	0.400561	0.115597	0.299184	0.299127	0.86713	0.78937	0.227013	0.71258	0.504869	0.488032	0.998622	0.979703	0.984659	0.70245	0.346363	0.300144	0.398061	0.999932	0.858964	1	0.594359	0.258202	0.938753	0.865976	0.657113	0.999441	0.51953	0.311465	0.195607	0.795049	0.990195	0.680443	0.103093	0.741388	0.35881
Dzip3	0.204541	0.90073	0.190355	0.342524	0.343174	0.826298	0.242622	0.922239	0.991833	0.580095	0.997582	0.953233	0.997331	0.901424	0.354331	0.96054	0.358866	0.750498	0.556843	0.78893	0.050236	0.683157	0.999044	0.53913	0.998622	0.885014	0.984659	0.45625	0.13033	0.923252	0.913296	0.999932	0.988291	1	0.238638	0.861837	0.211039	0.735912	0.968492	0.999441	0.860904	0.847826	0.14705	0.953783	0.995606	0.638946	0.800439	0.942998	0.533442
Ahnak	0.199558	0.62679	0.691611	0.619128	0.401984	0.120979	0.766872	0.922239	0.939925	0.878882	0.997582	0.955323	0.997331	0.960183	0.12552	0.514696	0.18455	0.986933	0.740742	0.0211987	0.846887	0.538385	0.834114	0.358498	0.999529	0.948375	0.659564	0.965431	0.611229	0.365188	0.472832	0.999932	0.873844	1	0.331461	0.0324612	0.834867	0.753353	0.258202	0.999441	0.243846	0.23093	0.934996	0.676585	0.990195	0.98467	0.178888	0.764055	0.992572
Tlcd3a	0.0102233	0.194329	0.014436	0.467195	0.355603	0.465032	0.208964	0.733582	0.790636	0.178191	0.997582	0.953233	0.997331	0.901424	0.000165257	2.95681e-08	0.00125464	0.256153	0.533392	7.55976e-05	0.701054	0.0821519	4.34282e-06	0.0097731	0.998622	0.8764	0.0253792	0.922753	0.176236	0.617165	0.193034	0.999932	0.947074	1	0.00259303	1.58092e-07	0.258994	0.324855	4.95143e-05	0.999441	0.0222069	0.154597	0.675953	0.424825	0.990195	0.907085	0.113205	0.741388	0.409869
Txndc15	0.594446	0.56619	0.159719	0.0646927	0.575594	0.789805	0.0245586	0.948409	0.929315	0.548114	0.997582	0.972725	0.997331	0.901424	0.299953	0.387216	0.00659917	0.0147254	0.512506	0.815737	0.00108364	0.663921	0.765865	0.0345776	0.998622	0.865992	0.985312	0.228914	0.9927	0.86007	0.85626	0.999932	0.987566	1	0.65481	0.499839	0.485627	0.893954	0.80378	0.999441	0.359159	0.489289	0.00277807	0.728971	0.993316	0.372674	0.672468	0.912379	0.0636871
Sfi1	0.163597	0.66564	0.178979	0.703653	0.253448	0.0263448	0.469903	0.922239	0.949109	0.569727	0.997582	0.953233	0.997331	0.908066	0.552972	0.104375	0.230298	0.506468	0.318908	0.866812	0.311145	0.800694	0.480942	0.414238	0.998622	0.802698	0.992936	0.768462	0.048537	0.0344684	0.364462	0.999932	0.457018	1	0.31045	0.233942	0.195462	0.744474	0.636154	0.999441	0.897321	0.257965	0.82264	0.960449	0.990195	0.951483	0.138982	0.748611	0.219397
Borcs6	0.634504	0.673198	0.241179	0.65691	0.303884	0.457703	0.640138	0.957357	0.949632	0.615554	0.997582	0.953233	0.997331	0.938443	0.922712	0.8855	0.332681	0.263185	0.413688	0.730585	0.25077	0.976537	0.983926	0.517235	0.998622	0.837463	0.981634	0.728868	0.257908	0.342704	0.475642	0.999932	0.86485	1	0.33271	0.679212	0.0119643	0.753353	0.895014	0.999441	0.72246	0.843757	0.972591	0.909259	0.995606	0.991671	0.267763	0.772425	0.155597
Tsfm	0.166543	0.0796332	0.193933	0.672878	0.243638	0.480567	0.473636	0.922239	0.595636	0.582046	0.997582	0.953233	0.997331	0.908066	0.564159	0.025152	0.00755126	0.673995	0.0721999	0.357949	0.543999	0.806309	0.231793	0.0381828	0.998622	0.627513	0.955487	0.866123	0.87586	0.0710476	0.857091	0.999932	0.610892	1	0.28677	0.0367392	0.998365	0.744347	0.27432	0.999441	0.104683	0.556782	0.460389	0.531622	0.995606	0.810135	0.928424	0.970591	0.852194
Rpusd1	0.354375	0.655293	0.745656	0.85993	0.614051	0.970719	0.808684	0.922239	0.946344	0.908164	0.997582	0.976655	0.997331	0.968497	0.802742	0.535796	0.820419	0.305246	0.452258	0.857384	0.278725	0.933097	0.842104	0.901138	0.998622	0.846479	0.991497	0.75395	0.298015	0.776429	0.768923	0.999932	0.987566	1	0.526728	0.502871	0.11551	0.837751	0.804936	0.999441	0.806565	0.765861	0.953069	0.938066	0.995606	0.988378	0.800678	0.942998	0.585835
Fam162a	0.926785	0.474041	0.840444	0.890509	0.834077	0.844301	0.644346	0.995432	0.9143	0.949909	0.997582	0.991191	0.997331	0.938695	0.381238	0.817982	0.0360121	0.799885	0.483169	0.541944	0.567598	0.699247	0.954211	0.119447	0.998622	0.858083	0.965098	0.877993	0.868247	0.534273	0.841668	0.999932	0.933345	1	0.165018	0.615553	0.766064	0.668817	0.857291	0.999441	0.952691	0.704898	0.64374	0.979053	0.995606	0.894755	0.672446	0.912379	0.749004
Enoph1	0.327741	0.812718	0.072456	0.13357	0.314623	0.931141	0.675325	0.922239	0.984355	0.396953	0.997582	0.953233	0.997331	0.942277	0.133082	0.87811	0.46733	0.576449	0.670844	0.9996	0.204771	0.543714	0.98211	0.636007	0.998622	0.923541	0.999849	0.688168	0.997012	0.843223	0.403174	0.999932	0.987566	1	0.436128	0.963575	0.627468	0.808576	0.989025	0.999441	0.18323	0.97326	0.213533	0.624685	0.997528	0.695927	0.890148	0.957929	0.553435
Hddc2	0.490538	0.702884	0.671097	0.487129	0.581021	0.683581	0.0957658	0.947805	0.960475	0.8679	0.997582	0.972725	0.997331	0.901424	0.301292	0.404905	0.284032	0.316105	0.353984	0.506903	0.363172	0.664535	0.772892	0.473891	0.998622	0.815552	0.961632	0.790053	0.920289	0.978909	0.147584	0.999932	0.996407	1	0.89958	0.764819	0.492471	0.980711	0.938125	0.999441	0.316722	0.53542	0.379692	0.711567	0.995606	0.789125	0.384227	0.772425	0.0212221
Tubb6	0.508104	0.774134	0.225999	0.860744	0.56116	0.0849337	0.837287	0.947805	0.978525	0.608186	0.997582	0.971438	0.997331	0.977551	0.26182	0.757649	0.00044544	0.847535	0.777794	0.125028	0.90085	0.641829	0.927892	0.00427122	0.998622	0.95687	0.928418	0.978032	0.944326	0.173636	0.769857	0.999932	0.797572	1	0.487652	0.279336	0.825635	0.831915	0.672168	0.999441	0.395418	0.287926	0.991618	0.744823	0.990195	0.99639	0.0921331	0.741388	0.962012
Wwtr1	0.37221	0.160543	0.533674	0.230228	0.406052	0.241877	0.293996	0.922239	0.753796	0.799862	0.997582	0.955323	0.997331	0.901424	0.34784	0.237577	0.432469	0.276913	0.440159	0.381572	0.366019	0.680539	0.674457	0.605303	0.998622	0.844903	0.955487	0.792031	0.351395	0.196618	0.255366	0.999932	0.81343	1	0.328767	0.324812	0.323981	0.752704	0.696708	0.999441	0.656779	0.705184	0.814726	0.866606	0.995606	0.948514	0.0798485	0.741388	0.86896
Golt1b	0.646125	0.118251	0.631071	0.223681	0.949422	0.522584	0.106802	0.961009	0.687827	0.844522	0.997582	0.999856	0.997331	0.901424	0.393436	0.311875	0.925173	0.0477768	0.557953	0.905816	0.375539	0.708455	0.725117	0.961825	0.998622	0.885014	0.996603	0.792983	0.779142	0.145259	0.832032	0.999932	0.75044	1	0.430805	0.414508	0.390694	0.804477	0.748983	0.999441	0.70534	0.519708	0.0439363	0.899725	0.995453	0.490115	0.412106	0.772425	0.236695
Ctu2	0.65316	0.133969	0.828516	0.707131	0.155023	0.782758	0.27257	0.962835	0.713126	0.945012	0.997582	0.953233	0.997331	0.901424	0.0182778	0.461632	0.474533	0.973362	0.774835	0.175737	0.124112	0.329389	0.808574	0.643967	0.998895	0.955583	0.955487	0.599515	0.535668	0.312544	0.610359	0.999932	0.858964	1	0.0248889	0.588278	0.224516	0.490263	0.843267	0.999441	0.233962	0.228815	0.327273	0.673295	0.990195	0.772598	0.143387	0.754603	0.979281
Lypd3	0.394819	5.13e-05	0.327723	0.519764	0.00112703	0.116564	0.338375	0.923029	0.00319586	0.681247	0.997582	0.953233	0.997331	0.901424	0.0367098	3.14225e-07	0.0221563	0.224589	0.00171909	0.00585991	0.652762	0.403593	3.31878e-05	0.0839795	0.998622	0.245362	0.350848	0.906883	0.0879524	9.52933e-05	0.853647	0.999932	0.0107657	1	0.806706	8.09948e-08	0.323938	0.964864	2.71795e-05	0.999441	0.0173734	0.06608	0.307278	0.411514	0.896057	0.758838	0.407084	0.772425	0.00368517
Ccdc115	0.185679	0.222337	0.23974	0.102108	0.139953	0.184582	0.103339	0.922239	0.806437	0.614048	0.997582	0.953233	0.997331	0.901424	0.0994744	0.982481	0.876705	0.892885	0.814534	0.0910832	0.0476105	0.515762	0.999044	0.934357	0.998622	0.965198	0.898407	0.449725	0.835547	0.308372	0.105247	0.999932	0.858964	1	0.297513	0.257281	0.220522	0.744474	0.656852	0.999441	0.203002	0.218545	0.124428	0.64007	0.990195	0.628948	0.690878	0.912379	0.202594
Ifi27l2a	0.0766746	0.000155117	2.8e-05	0.824476	0.243604	0.482006	0.785536	0.922239	0.00810055	0.00392193	0.997582	0.953233	0.997331	0.962985	0.855426	5.3797e-05	0.242646	0.987566	0.0222742	0.574537	0.758202	0.952359	0.00251588	0.42753	0.999529	0.46381	0.968564	0.939832	0.668519	0.00084568	0.830629	0.999932	0.0493646	1	0.0123132	0.000592776	1	0.439299	0.0210974	1	0.0974567	0.0247903	0.865971	0.526208	0.619946	0.964793	0.0326851	0.690676	0.00125036
Psme3ip1	0.614237	0.806422	0.361909	0.0265439	0.993023	0.801167	0.0795625	0.950947	0.982719	0.696976	0.997582	0.999856	0.997331	0.901424	0.655809	0.977293	0.735832	0.0300932	0.960302	0.96232	0.00697128	0.858341	0.999044	0.847382	0.998622	0.997109	0.998116	0.266298	0.734191	0.749569	0.651393	0.999932	0.985302	1	0.819125	0.96234	0.69296	0.967991	0.98858	0.999441	0.707353	0.9933	0.00901792	0.900825	0.998318	0.386631	0.689411	0.912379	0.26098
Ripor1	0.110023	0.298609	0.313263	0.884878	0.498602	0.288469	0.228967	0.922239	0.852818	0.672957	0.997582	0.965552	0.997331	0.901424	0.557088	0.0113384	0.0260039	0.935017	0.132131	0.924107	0.174453	0.80308	0.144917	0.0951856	0.998622	0.695109	0.996665	0.657398	0.560379	0.999595	0.53369	0.999932	1	1	0.474402	0.132362	0.42558	0.826149	0.512304	0.999441	0.0521501	0.0819819	0.227401	0.457204	0.933133	0.712157	0.107848	0.741388	0.509982
Rpf1	0.737632	0.839764	0.7622	0.256497	0.613667	0.308164	0.161044	0.979216	0.985535	0.915508	0.997582	0.976655	0.997331	0.901424	0.97301	0.828854	0.640416	0.22758	0.899335	0.496357	0.118002	0.991468	0.959747	0.775562	0.998622	0.988132	0.959946	0.589041	0.571775	0.410998	0.90389	0.999932	0.893697	1	0.842647	0.756864	0.838671	0.975469	0.934754	0.999441	0.887852	0.553442	0.0775011	0.958009	0.995606	0.567897	0.820465	0.946323	0.983594
Tmem94	0.97455	0.951537	0.813949	0.544009	0.450412	0.203463	0.172261	0.998014	0.993072	0.937983	0.997582	0.960664	0.997331	0.901424	0.326179	0.496189	0.0322419	0.298483	0.92753	0.22274	0.108471	0.673097	0.826835	0.110773	0.998622	0.9923	0.955487	0.576864	0.644622	0.470349	0.678766	0.999932	0.925959	1	0.497861	0.674019	0.740435	0.834652	0.892989	0.999441	0.478033	0.219863	0.0722561	0.794754	0.990195	0.557938	0.827044	0.948531	0.806084
Endod1	0.00400431	0.364904	0.166473	0.338413	0.0449151	0.823325	0.300907	0.675146	0.873319	0.559656	0.997582	0.953233	0.997331	0.901424	0.000596909	0.116575	0.0178837	0.422092	0.281477	0.561785	0.297756	0.130233	0.505829	0.0721486	0.998622	0.784465	0.966705	0.761193	0.487132	0.593192	0.934554	0.999932	0.939605	1	0.0608057	0.116459	0.993697	0.586514	0.481091	0.999441	0.00470732	0.456225	0.228737	0.320484	0.990195	0.714736	0.391072	0.772425	0.0582834
Slc25a23	0.250025	0.290976	0.0583341	0.78637	0.538932	0.505263	0.248945	0.922239	0.849884	0.361493	0.997582	0.970282	0.997331	0.901424	0.344338	0.192432	0.000639861	0.172583	0.460984	0.538114	0.776033	0.678789	0.617269	0.0056796	0.998622	0.84767	0.965098	0.9432	0.666863	0.190421	0.268604	0.999932	0.808609	1	0.961008	0.170025	0.171139	0.988971	0.559564	0.999441	0.263737	0.854342	0.56293	0.683197	0.995606	0.860778	0.820643	0.946323	0.0606583
Arhgap27	0.942551	0.938925	0.032126	0.816885	0.954396	0.336735	0.690894	0.995432	0.993072	0.27199	0.997582	0.999856	0.997331	0.946156	0.456814	0.633637	0.013525	0.889899	0.493796	0.458469	0.62357	0.750829	0.882269	0.0590775	0.998622	0.85953	0.957485	0.898323	0.912074	0.439884	0.90426	0.999932	0.909978	1	0.216786	0.686305	0.799872	0.723595	0.899627	0.999441	0.994903	0.553328	0.689625	0.99777	0.995606	0.907085	0.105706	0.741388	0.633936
Dus4l	0.990021	0.789692	0.672652	0.816446	0.390295	0.664245	0.940249	0.998679	0.978686	0.868418	0.997582	0.953233	0.997331	0.992578	0.778286	0.960176	0.434081	0.875252	0.159768	0.949388	0.555877	0.924073	0.999044	0.606835	0.998622	0.712494	0.997587	0.872183	0.602594	0.691927	0.925036	0.999932	0.967957	1	0.244808	0.878241	0.546702	0.739317	0.971815	0.999441	0.437335	0.832434	0.806544	0.772551	0.995606	0.944453	0.397131	0.772425	0.619533
Nr2c2ap	0.187378	0.217769	0.899966	0.228643	0.991364	0.938499	0.880308	0.922239	0.805989	0.967174	0.997582	0.999856	0.997331	0.983025	0.372714	0.429325	0.235554	0.393915	0.308539	0.392215	0.334907	0.694432	0.790034	0.420018	0.998622	0.799387	0.955487	0.77769	0.354274	0.337455	0.424297	0.999932	0.863455	1	0.415085	0.577158	0.916872	0.79368	0.839377	0.999441	0.357544	0.444631	0.373635	0.728356	0.990195	0.78583	0.967558	0.987002	0.973766
Vps26b	0.686282	0.640833	0.682266	0.11511	0.558793	0.514126	0.0717054	0.971533	0.944124	0.874221	0.997582	0.971366	0.997331	0.901424	0.33278	0.513657	0.648016	0.0615054	0.376982	0.33617	0.116177	0.675415	0.834114	0.782246	0.998622	0.82518	0.955487	0.586936	0.511877	0.486426	0.932068	0.999932	0.927727	1	0.291771	0.264156	0.745216	0.744347	0.662045	0.999441	0.837912	0.820245	0.0145752	0.948706	0.995606	0.391607	0.0675956	0.741388	0.583115
Plin5	0.141214	0.436346	0.0708904	0.907151	0.813492	0.53291	0.842656	0.922239	0.901866	0.393835	0.997582	0.987287	0.997331	0.978032	0.187457	0.699149	0.239382	0.389394	0.976237	0.278139	0.373838	0.588195	0.91088	0.423945	0.998622	0.998095	0.955487	0.792424	0.196362	0.870351	0.817379	0.999932	0.987566	1	0.280452	0.558154	0.175391	0.744347	0.831259	0.999441	0.421378	0.373517	0.946962	0.762918	0.990195	0.986764	0.200979	0.764055	0.586375
Ntpcr	0.424346	0.113884	0.0830962	0.589946	0.291506	0.77716	0.952647	0.93067	0.675095	0.41839	0.997582	0.953233	0.997331	0.992892	0.946535	0.57959	6.68891e-05	0.907221	0.0185911	0.0346636	0.632937	0.982816	0.858539	0.000962876	0.998622	0.43731	0.783411	0.901209	0.861985	0.500245	0.831799	0.999932	0.930887	1	0.201227	0.178013	0.872751	0.704462	0.569657	0.999441	0.032403	0.0817301	0.586479	0.432389	0.933133	0.871743	0.470466	0.798502	0.0270483
Lamtor1	0.591723	0.567349	0.999383	0.718931	0.27502	0.382131	0.277925	0.948409	0.930081	0.999667	0.997582	0.953233	0.997331	0.901424	0.82846	0.798525	0.170709	0.579051	0.141284	0.157128	0.281905	0.942344	0.945481	0.341345	0.998622	0.695259	0.946526	0.755216	0.674934	0.807037	0.606633	0.999932	0.987566	1	0.30349	0.263976	0.644666	0.744474	0.661771	0.999441	0.281706	0.373655	0.344266	0.691408	0.990195	0.78182	0.453224	0.788583	0.603545
Tmed9	0.36741	0.375777	0.643179	0.837685	0.934655	0.385108	0.479019	0.922239	0.874983	0.852374	0.997582	0.999856	0.997331	0.908066	0.561732	0.809327	4.97498e-05	0.825906	0.507745	0.993812	0.422193	0.804798	0.949891	0.00075549	0.998622	0.864241	0.999497	0.809731	0.676662	0.160282	0.439119	0.999932	0.777825	1	0.689688	0.926697	0.283878	0.915114	0.98001	0.999441	0.484302	0.896879	0.674546	0.794754	0.995606	0.907085	0.768554	0.942572	0.838689
Ist1	0.312636	0.743129	0.760756	0.995	0.0496967	0.398336	0.800905	0.922239	0.971497	0.915428	0.999747	0.953233	0.997331	0.966241	0.0558511	0.854611	0.993517	0.193641	0.28292	0.679637	0.363435	0.452954	0.971854	0.996804	0.998622	0.785287	0.978644	0.790441	0.545384	0.390136	0.859855	0.999932	0.880093	1	0.54875	0.815977	0.149245	0.84645	0.957494	0.999441	0.039093	0.746155	0.857739	0.435212	0.995606	0.964318	0.666369	0.912379	0.250913
Suds3	0.799077	0.0756082	0.903981	0.646719	0.85874	0.228612	0.773719	0.987845	0.584258	0.968842	0.997582	0.992504	0.997331	0.96114	0.913611	0.218871	0.0257852	0.432048	0.963919	0.582536	0.764836	0.972721	0.653479	0.0947022	0.998622	0.99745	0.968564	0.941399	0.851953	0.0857272	0.913893	0.999932	0.657495	1	0.962805	0.168025	0.703041	0.989429	0.556623	0.999441	0.852809	0.623798	0.478911	0.95066	0.995606	0.819746	0.546402	0.853599	0.383307
Psmd6	0.581141	0.519562	0.950121	0.338983	0.718467	0.410309	0.867094	0.948409	0.922022	0.98109	0.997582	0.977609	0.997331	0.982296	0.571552	0.731386	0.977593	0.205911	0.78488	0.572213	0.91641	0.809191	0.920262	0.988638	0.998622	0.957672	0.968564	0.979139	0.861365	0.30459	0.552887	0.999932	0.858964	1	0.847309	0.514265	0.323479	0.976489	0.80966	0.999441	0.545906	0.889649	0.447453	0.799612	0.995606	0.808759	0.88829	0.957929	0.582516
Rpain	0.790646	0.360327	0.0450228	0.189914	0.0295146	0.907855	0.14281	0.987567	0.873319	0.322326	0.997582	0.953233	0.997331	0.901424	0.0806421	0.225251	0.0376789	0.134249	0.480507	0.776865	0.238731	0.491819	0.660975	0.123525	0.998622	0.857396	0.983221	0.714218	0.295179	0.580626	0.959931	0.999932	0.934098	1	0.497291	0.33719	0.830655	0.834652	0.706123	0.999441	0.0115492	0.201167	0.00661035	0.368494	0.990195	0.386631	0.358644	0.772425	0.582734
Rassf7	0.761697	0.605001	0.228357	0.771173	0.21115	0.198243	0.604605	0.984016	0.937056	0.609891	0.997582	0.953233	0.997331	0.931368	0.914322	0.0345025	0.302476	0.897133	0.473173	0.258007	0.397122	0.972721	0.277723	0.490643	0.998622	0.853443	0.955487	0.798957	0.38352	0.286242	0.909266	0.999932	0.858964	1	0.603909	0.0561324	0.645885	0.869363	0.341152	0.999441	0.332879	0.436518	0.411577	0.721008	0.990195	0.802001	0.438628	0.78009	0.156172
2400010D15Rik	0.730123	0.91959	0.0042958	0.117367	0.594223	0.813995	0.110714	0.979206	0.992776	0.0940078	0.997582	0.975595	0.997331	0.901424	0.748593	0.703163	0.000565677	0.129402	0.44511	0.690347	0.010102	0.909732	0.912301	0.00514749	0.998622	0.846139	0.980287	0.285636	0.899216	0.818266	0.954621	0.999932	0.987566	1	0.592576	0.499822	0.261704	0.865243	0.80378	0.999441	0.525492	0.941394	0.0335806	0.795049	0.996237	0.471271	0.0428753	0.741388	0.222288
Lmf1	0.349071	0.747188	0.186316	0.168028	0.703699	0.707159	0.451432	0.922239	0.972658	0.57573	0.997582	0.977609	0.997331	0.902959	0.29717	0.108677	0.34015	0.907912	0.94407	0.368309	0.0660946	0.661369	0.489957	0.523735	0.998622	0.995166	0.955487	0.5017	0.696009	0.960796	0.638703	0.999932	0.992042	1	0.59695	0.10878	0.286429	0.867317	0.467139	0.999441	0.317786	0.594086	0.115835	0.711567	0.995606	0.620623	0.468988	0.797573	0.971935
Rtf2	0.276511	0.0417263	0.541499	0.0141694	0.124942	0.209413	0.048883	0.922239	0.459282	0.802981	0.997582	0.953233	0.997331	0.901424	0.392809	0.0142463	0.233228	0.139912	0.0149154	0.220459	0.000164016	0.708443	0.165218	0.41759	0.998622	0.417102	0.955487	0.228914	0.760272	0.0559411	0.640205	0.999932	0.554365	1	0.190019	0.0170185	0.0840223	0.699793	0.177602	0.999441	0.0317897	0.577176	0.00146742	0.432389	0.995606	0.372674	0.686176	0.912379	0.223753
Rpusd4	0.0434716	0.429989	0.00135519	0.910001	0.263356	0.0491394	0.386054	0.918356	0.898999	0.0477109	0.997582	0.953233	0.997331	0.901424	0.437598	0.400969	0.00317187	0.919426	0.0731177	0.0717061	0.423418	0.738893	0.770646	0.0199836	0.998622	0.627513	0.881503	0.810132	0.497141	0.414307	0.622841	0.999932	0.894881	1	0.526024	0.422227	0.640244	0.837751	0.753575	0.999441	0.0283657	0.0542444	0.462552	0.429185	0.841057	0.811154	0.0076008	0.486037	0.898715
Tmem134	0.0933409	0.0157813	0.681723	0.381957	0.461637	0.648046	0.932015	0.922239	0.270721	0.874221	0.997582	0.961316	0.997331	0.990251	0.779454	0.0160484	1.11732e-07	0.339599	0.0274008	0.689804	0.788234	0.924525	0.17895	5.04944e-06	0.998622	0.492544	0.980287	0.948585	0.529603	0.039229	0.559727	0.999932	0.480624	1	0.0833588	0.252292	0.679755	0.617598	0.651605	0.999441	0.0651864	0.222152	0.483765	0.477018	0.990195	0.822111	0.692937	0.912379	0.898593
2410002F23Rik	0.475243	0.389218	0.720365	0.101285	0.493608	0.472489	0.041698	0.94577	0.880281	0.895341	0.997582	0.965358	0.997331	0.901424	0.604348	0.832318	0.551981	0.0491783	0.0149032	0.798477	0.00227142	0.82679	0.962099	0.708613	0.998622	0.417102	0.985168	0.239344	0.932497	0.32745	0.856999	0.999932	0.862952	1	0.0357302	0.551557	0.470494	0.521514	0.828262	0.999441	0.238457	0.924472	0.00356244	0.676585	0.995606	0.384743	0.326421	0.772425	0.156856
Tepsin	0.329194	0.292763	0.237709	0.0198073	0.987045	0.984163	0.12585	0.922239	0.850284	0.614048	0.997582	0.999856	0.998939	0.901424	0.581005	0.507616	0.0448843	0.0234043	0.628965	0.515497	0.0175554	0.813927	0.831593	0.140113	0.998622	0.90737	0.964094	0.332413	0.359172	0.35141	0.358676	0.999932	0.866887	1	0.929322	0.704313	0.964611	0.984959	0.909559	0.999441	0.592132	0.536638	0.0352493	0.828539	0.995606	0.471545	0.416876	0.772425	0.330016
Trappc13	0.646119	0.387332	0.871214	0.96422	0.55075	0.779578	0.672068	0.961009	0.879637	0.958299	0.997582	0.970444	0.997331	0.942277	0.992721	0.212107	0.344121	0.955294	0.195843	0.956691	0.506562	0.997829	0.644304	0.527432	0.998895	0.736189	0.998116	0.850087	0.96902	0.635525	0.790898	0.999932	0.951155	1	0.342804	0.189031	0.495429	0.755376	0.583295	0.999441	0.492947	0.428694	0.74569	0.794754	0.990195	0.922684	0.569848	0.871139	0.906501
Uqcc1	0.685304	0.978084	0.899521	0.36993	0.677751	0.7396	0.290653	0.971533	0.996423	0.967116	0.997582	0.977609	0.997331	0.901424	0.857928	0.301098	0.0309273	0.206774	0.543914	0.263944	0.491247	0.952809	0.718721	0.107593	0.998622	0.879092	0.955487	0.843112	0.987635	0.8215	0.951944	0.999932	0.987566	1	0.763527	0.167616	0.601737	0.949681	0.55621	0.999441	0.585151	0.823657	0.194555	0.823987	0.995606	0.679966	0.903659	0.960898	0.661922
Sac3d1	0.149446	0.709008	0.642253	0.916686	0.237801	0.271902	0.288437	0.922239	0.962686	0.851992	0.997582	0.953233	0.997331	0.901424	0.00560628	0.471896	0.0739069	0.524401	0.396933	0.115571	0.328785	0.240036	0.812664	0.196672	0.998622	0.831727	0.920667	0.77736	0.807021	0.325238	0.549664	0.999932	0.861514	1	0.0356257	0.0391639	0.810678	0.521514	0.28263	0.999441	0.0576898	0.579584	0.355213	0.467287	0.995606	0.783387	0.0949641	0.741388	0.293636
Aldh16a1	0.272012	0.242062	0.31449	0.290992	0.303666	0.351648	0.217723	0.922239	0.822826	0.673711	0.997582	0.953233	0.997331	0.901424	0.335979	0.344381	0.930677	0.252375	0.0670033	0.696802	0.0194799	0.67617	0.743291	0.965603	0.998622	0.615119	0.980494	0.340729	0.262084	0.296373	0.25113	0.999932	0.858964	1	0.0719284	0.804278	0.491803	0.603428	0.954024	0.999441	0.45664	0.406393	0.0132206	0.785678	0.990195	0.391607	0.457098	0.791343	0.195109
Haus8	0.308524	0.204672	0.26719	0.267931	0.427334	0.293569	0.22084	0.922239	0.796847	0.641032	0.997582	0.955323	0.997331	0.901424	0.396194	0.867744	0.902741	0.470569	0.702843	0.771523	0.548586	0.709788	0.976978	0.948342	0.998622	0.934208	0.983221	0.869868	0.328093	0.242329	0.237958	0.999932	0.857137	1	0.303061	0.886038	0.867227	0.744474	0.972611	0.999441	0.779177	0.800898	0.431895	0.931843	0.995606	0.806486	0.355111	0.772425	0.596518
Kctd20	0.322709	0.023718	0.86636	0.273015	0.572512	0.164396	0.628907	0.922239	0.339344	0.955955	0.997582	0.972646	0.997331	0.935223	0.715142	0.0545274	0.325382	0.0539698	0.346742	0.36867	0.767654	0.891477	0.344229	0.510447	0.998622	0.810791	0.955487	0.942669	0.727776	0.000750605	0.477143	0.999932	0.0449311	1	0.349517	0.00942894	0.0270184	0.758563	0.126344	0.999441	0.362142	0.679707	0.410461	0.729552	0.995606	0.801474	0.109641	0.741388	0.607372
Zfp428	0.222483	0.539002	0.921617	0.864749	0.100622	0.916328	0.497121	0.922239	0.928595	0.973284	0.997582	0.953233	0.997331	0.913567	0.10389	0.522065	0.36706	0.782872	0.12409	0.793533	0.556523	0.521355	0.837132	0.546462	0.998622	0.6881	0.984659	0.872638	0.796848	0.78341	0.764845	0.999932	0.987566	1	0.914814	0.910963	0.905111	0.983067	0.977026	0.999441	0.0347506	0.639667	0.492831	0.432389	0.995606	0.826804	0.684806	0.912379	0.141132
Svbp	0.974301	0.846863	0.0750403	0.248434	0.895526	0.605225	0.732037	0.997977	0.986756	0.401925	0.997582	0.998041	0.997331	0.954056	0.575182	0.541519	0.517823	0.3616	0.536711	0.218824	0.506197	0.811331	0.844069	0.681728	0.998622	0.87762	0.955487	0.849974	0.937392	0.869427	0.591751	0.999932	0.987566	1	0.461292	0.28769	0.815475	0.822603	0.676833	0.999441	0.941274	0.52275	0.197572	0.972532	0.995606	0.6813	0.270682	0.772425	0.367136
Rsl1d1	0.00116849	0.564219	0.764208	0.0923874	0.00144762	0.86883	0.321797	0.305106	0.929315	0.916036	0.997582	0.953233	0.997331	0.901424	0.00644184	0.00736268	0.212414	0.728551	0.0114173	0.0398163	0.10306	0.257673	0.109171	0.393693	0.998622	0.382031	0.793735	0.571542	0.792952	0.624463	0.404801	0.999932	0.947074	1	0.928407	0.00413615	0.463229	0.984932	0.0758104	0.999441	0.00134223	0.911674	0.140465	0.268332	0.995606	0.638946	0.118919	0.741388	0.0372507
Rmdn1	0.380081	0.640935	0.867236	0.727401	0.480229	0.492333	0.837795	0.922239	0.944124	0.956473	0.997582	0.965358	0.997331	0.977551	0.903378	0.428229	0.375117	0.843765	0.985021	0.355403	0.687314	0.96902	0.790034	0.552692	0.998622	0.998301	0.955487	0.91837	0.253077	0.382907	0.902351	0.999932	0.877912	1	0.948093	0.155759	0.878427	0.987462	0.53992	0.999441	0.916954	0.886404	0.718129	0.96394	0.995606	0.915376	0.879074	0.956884	0.335237
Ints11	0.682351	0.247998	0.114501	0.10172	0.557809	0.92177	0.956109	0.971442	0.823737	0.475574	0.997582	0.971366	0.997331	0.993642	0.213053	0.571689	0.0362075	0.193555	0.602713	0.078779	0.88511	0.606328	0.853674	0.119968	0.998622	0.901719	0.887468	0.974814	0.945401	0.452627	0.241238	0.999932	0.921236	1	0.307096	0.121757	0.432507	0.744474	0.494188	0.999441	0.492143	0.353688	0.265171	0.794754	0.990195	0.742088	0.29755	0.772425	0.367382
Castor1	0.138417	0.681341	0.171286	0.535077	0.0990865	0.530004	0.467633	0.922239	0.951729	0.564262	0.997582	0.953233	0.997331	0.908066	0.00372123	0.0621397	6.74912e-05	0.288659	0.686358	0.0694135	0.427079	0.216022	0.368758	0.000970058	0.998622	0.928877	0.879362	0.812003	0.931812	0.456339	0.264722	0.999932	0.922096	1	0.00220343	0.000161772	0.0199055	0.30005	0.00800008	0.999441	0.0693318	0.837272	0.929939	0.484699	0.995606	0.982538	0.418923	0.772425	0.639033
Ndufa12	0.211071	0.831151	0.295403	0.716412	0.590306	0.77981	0.49663	0.922239	0.985535	0.660951	0.997582	0.975595	0.997331	0.913567	0.270648	0.391547	0.000344332	0.357397	0.123937	0.873261	0.55283	0.646466	0.76678	0.00349916	0.998622	0.6881	0.994128	0.870837	0.661862	0.961251	0.873743	0.999932	0.992054	1	0.759871	0.461474	0.72873	0.948972	0.781968	0.999441	0.0687936	0.611154	0.261961	0.484699	0.995606	0.742088	0.804166	0.942998	0.339663
Ermard	0.0924091	0.0446321	0.173449	0.981279	0.3822	0.130102	0.184405	0.922239	0.47042	0.565637	0.997582	0.953233	0.997331	0.901424	0.645094	0.0712791	0.00679613	0.5446	0.031299	0.154295	0.500133	0.853107	0.399775	0.0353621	0.998622	0.505416	0.946526	0.846919	0.438076	0.593414	0.357791	0.999932	0.939605	1	0.297184	0.475869	0.903621	0.744474	0.789698	0.999441	0.127541	0.0300558	0.351793	0.565609	0.647717	0.783128	0.233523	0.772425	0.248158
Dph5	0.727675	0.323815	0.0213058	0.139589	0.923846	0.21406	0.949662	0.978876	0.864227	0.220432	0.997582	0.999856	0.997331	0.992642	0.614292	0.510452	0.821348	0.659074	0.968662	0.117405	0.339971	0.832814	0.832451	0.901632	0.998622	0.998069	0.921557	0.778654	0.877803	0.883431	0.291565	0.999932	0.987566	1	0.729886	0.566217	0.737534	0.93298	0.835729	0.999441	0.716425	0.109335	0.317911	0.905654	0.990195	0.766454	0.0675883	0.741388	0.531057
Mlec	0.789867	0.00515251	0.560388	0.176849	0.237592	0.0402882	0.445675	0.987567	0.129849	0.810034	0.997582	0.953233	0.997331	0.902322	0.624221	0.763105	0.149466	0.744426	0.282296	0.490012	0.19366	0.838611	0.930154	0.314805	0.998622	0.784872	0.959206	0.676173	0.299737	0.000361377	0.568526	0.999932	0.0283019	1	0.292609	0.600839	0.560563	0.744347	0.849948	0.999441	0.652519	0.659283	0.223907	0.865792	0.995606	0.708492	0.303492	0.772425	0.105201
Tmco6	0.648245	0.617973	0.52271	0.127007	0.435542	0.445466	0.16052	0.96139	0.938997	0.793264	0.997582	0.955323	0.997331	0.901424	0.426694	0.424382	0.0279776	0.163088	0.530693	0.534514	0.117129	0.73112	0.78791	0.100378	0.998622	0.874258	0.965098	0.588169	0.852194	0.90553	0.844423	0.999932	0.987566	1	0.764048	0.891194	0.986262	0.949729	0.973202	0.999441	0.44501	0.408102	0.0698457	0.777775	0.990195	0.552061	0.695768	0.912764	0.413606
Micos13	0.641137	0.576482	0.304082	0.909386	0.927052	0.431732	0.362306	0.959792	0.932482	0.666596	0.997582	0.999856	0.997331	0.901424	0.79379	0.509013	0.411352	0.939835	0.904284	0.36437	0.326436	0.928901	0.831647	0.584669	0.998622	0.988956	0.955487	0.774525	0.625876	0.285946	0.539602	0.999932	0.858964	1	0.862888	0.256723	0.466948	0.977124	0.656729	0.999441	0.8437	0.860713	0.515369	0.948777	0.995606	0.838153	0.588984	0.884992	0.668742
Dctpp1	0.49985	0.0383591	0.0741836	0.854361	0.154665	0.173273	0.655269	0.947805	0.438657	0.400532	0.997582	0.953233	0.997331	0.940065	0.246702	0.0224352	0.0412074	0.77417	0.431624	0.0949167	0.767839	0.632314	0.215194	0.131216	0.998622	0.84384	0.899663	0.942669	0.583817	0.0363454	0.893921	0.999932	0.466976	1	0.913466	0.016513	0.952287	0.983067	0.173984	0.999441	0.0952657	0.665194	0.603696	0.526208	0.995606	0.877165	0.0697624	0.741388	0.27517
Gtf3c6	0.393935	0.719099	0.488279	0.0216693	0.196769	0.847154	0.136767	0.923029	0.965018	0.774436	0.997582	0.953233	0.997331	0.901424	0.687973	0.536469	0.876575	0.289458	0.111632	0.556119	0.0169435	0.878064	0.842104	0.934324	0.998622	0.667852	0.965957	0.33181	0.785604	0.588819	0.404314	0.999932	0.938237	1	0.385514	0.452301	0.369366	0.769189	0.776932	0.999441	0.202514	0.904313	0.02851	0.639714	0.995606	0.454034	0.409085	0.772425	0.468749
Riox1	0.871921	0.174443	0.838507	0.629021	0.912455	0.412706	0.0335553	0.993268	0.769197	0.94968	0.997582	0.999625	0.997331	0.901424	0.128349	0.409838	0.962581	0.258008	0.132332	0.629912	0.1941	0.539718	0.777721	0.981473	0.998622	0.695109	0.972637	0.676173	0.860351	0.0441045	0.127205	0.999932	0.502472	1	0.0260796	0.2178	0.98755	0.490263	0.617703	0.999441	0.938013	0.788954	0.138468	0.97146	0.995606	0.637743	0.0548172	0.741388	0.278526
Mterf3	0.194278	0.456376	0.015412	0.702485	0.494499	0.749718	0.651267	0.922239	0.90969	0.185735	0.997582	0.965358	0.997331	0.940065	0.0921401	0.163045	0.00164085	0.785124	0.991637	0.795766	0.732893	0.507987	0.581748	0.0119938	0.998622	0.99885	0.984904	0.929338	0.546643	0.697693	0.442719	0.999932	0.969329	1	0.211135	0.247154	0.634765	0.715205	0.648141	0.999441	0.255872	0.572735	0.952541	0.679092	0.995606	0.988378	0.238454	0.772425	0.446228
Cep57l1	0.337594	0.9948	0.00448598	0.655407	0.555158	0.995625	0.173637	0.922239	0.998379	0.0956946	0.997582	0.970586	0.999056	0.901424	0.995715	0.635201	0.246731	0.570007	0.202577	0.61669	0.405203	0.998242	0.883361	0.432055	0.998622	0.743348	0.972637	0.801876	0.703104	0.97689	0.430753	0.999932	0.995483	1	0.431117	0.46802	0.928837	0.804477	0.78485	0.999441	0.386079	0.996675	0.293817	0.737917	0.998908	0.75516	0.0719711	0.741388	0.0505147
Fam53a	0.128279	0.059868	0.0676224	0.322359	0.875419	0.566679	0.269532	0.922239	0.524962	0.386179	0.997582	0.994747	0.997331	0.901424	0.0935066	0.0545057	0.010929	0.758445	0.24554	0.782755	0.00320285	0.508543	0.344229	0.0505325	0.998622	0.762926	0.983492	0.239344	0.432082	0.147225	0.944979	0.999932	0.753233	1	0.825866	0.0625534	0.0122849	0.970291	0.359915	0.999441	0.0928046	0.19203	0.0670455	0.523683	0.990195	0.547315	0.358126	0.772425	0.545428
Mzt2	0.15233	0.935448	0.76767	0.164982	0.270878	0.413777	0.99666	0.922239	0.993072	0.917654	0.997582	0.953233	0.997331	0.999867	0.051854	0.0846397	0.390065	0.728329	0.716989	0.0253989	0.347625	0.447541	0.43739	0.565225	0.998622	0.940812	0.696248	0.780247	0.714337	0.503434	0.21637	0.999932	0.931186	1	0.207973	0.00412014	0.680346	0.709895	0.0757589	0.999441	0.145677	0.626858	0.414301	0.588535	0.995606	0.8028	0.415171	0.772425	0.791221
Tm2d2	0.421361	0.197308	0.239388	0.477223	0.647361	0.313506	0.112538	0.930564	0.791447	0.614048	0.997582	0.977609	0.997331	0.901424	0.170327	0.0618749	0.880439	0.314453	0.887579	0.11081	0.160512	0.580188	0.367797	0.936002	0.998622	0.986868	0.90873	0.643418	0.7782	0.0509628	0.468896	0.999932	0.532165	1	0.17836	0.00284676	0.757508	0.687625	0.059018	0.999441	0.447488	0.911153	0.1828	0.778963	0.995606	0.672418	0.493668	0.815885	0.426979
Usp46	0.538333	0.517182	0.953154	0.132473	0.346415	0.846432	0.188294	0.947805	0.922022	0.981693	0.997582	0.953233	0.997331	0.901424	0.300697	0.457197	0.838134	0.119929	0.503168	0.886437	0.204115	0.664155	0.807845	0.91112	0.998622	0.86277	0.995068	0.687945	0.311265	0.546415	0.842935	0.999932	0.933345	1	0.257878	0.585302	0.757902	0.744347	0.842283	0.999441	0.796544	0.710463	0.0510691	0.936829	0.995606	0.517801	0.353046	0.772425	0.97126
Znhit6	0.264194	0.153489	0.657057	0.639393	0.499129	0.448126	0.425747	0.922239	0.743711	0.859496	0.997582	0.965552	0.997331	0.901424	0.468508	0.0596344	0.000587802	0.595001	0.224813	0.415943	0.308504	0.75826	0.362589	0.00529754	0.998622	0.754197	0.955487	0.767329	0.78048	0.149174	0.836398	0.999932	0.755644	1	0.598602	0.0669346	0.664723	0.867571	0.373466	0.999441	0.184257	0.684774	0.366107	0.626042	0.995606	0.785152	0.404695	0.772425	0.581518
Trp53i13	0.365502	0.298241	0.412934	0.54314	0.618452	0.742812	0.272118	0.922239	0.852818	0.723325	0.997582	0.976655	0.997331	0.901424	0.417812	0.0167985	0.92197	0.487377	0.60882	0.449463	0.168029	0.72355	0.183398	0.959537	0.998622	0.903605	0.955487	0.649991	0.413972	0.629891	0.78598	0.999932	0.948284	1	0.465852	0.0353684	0.658631	0.824196	0.269304	0.999441	0.700135	0.227085	0.139555	0.896006	0.990195	0.637743	0.621668	0.903154	0.410748
Coprs	0.0874146	0.0019679	0.490935	0.099437	0.225534	0.513484	0.744995	0.922239	0.064454	0.77677	0.997582	0.953233	0.997331	0.957176	0.0934384	0.00180964	0.0475269	0.752324	0.365335	0.384996	0.350212	0.508543	0.0400251	0.144682	0.998622	0.820646	0.955487	0.781628	0.762538	0.00728333	0.136409	0.999932	0.209323	1	0.725886	0.00637447	0.627731	0.931498	0.0985107	0.999441	0.0536947	0.133556	0.420464	0.461166	0.990195	0.804483	0.251748	0.772425	0.22376
Atg2b	0.792492	0.887681	0.115361	0.106151	0.313366	0.456632	0.299782	0.987567	0.991762	0.477049	0.997582	0.953233	0.997331	0.901424	0.32816	0.816594	0.525519	0.234497	0.548505	0.656177	0.082282	0.673632	0.953423	0.687522	0.998622	0.879802	0.975314	0.534414	0.623472	0.587623	0.61598	0.999932	0.937126	1	0.665828	0.951736	0.737381	0.90013	0.986026	0.999441	0.368922	0.634888	0.0723847	0.730665	0.995606	0.557938	0.274069	0.772425	0.217582
Fbrsl1	0.746091	0.128612	0.050069	0.695099	0.366971	0.0918064	0.344105	0.980265	0.703287	0.337624	0.997582	0.953233	0.997331	0.901424	0.9678	0.628001	0.0357613	0.736414	0.146894	0.316637	0.215069	0.990058	0.880399	0.118885	0.998622	0.698686	0.955487	0.693076	0.783623	0.0518432	0.744843	0.999932	0.53658	1	0.354629	0.204508	0.57589	0.758892	0.601051	0.999441	0.340159	0.838324	0.263674	0.724817	0.995606	0.742088	0.0501261	0.741388	0.568299
Cep85	0.367106	0.30393	0.375137	0.842926	0.990919	0.47208	0.320386	0.922239	0.85685	0.702262	0.997582	0.999856	0.997331	0.901424	0.395861	0.564019	0.848511	0.681567	0.97891	0.765741	0.472862	0.709788	0.851772	0.917415	0.998622	0.998173	0.982079	0.833458	0.514244	0.190154	0.55869	0.999932	0.808609	1	0.566338	0.536618	0.846757	0.848965	0.819448	0.999441	0.536716	0.874918	0.437387	0.79716	0.995606	0.808409	0.682744	0.912379	0.131963
Katnbl1	0.715328	0.353708	0.386998	0.618231	0.647241	0.530036	0.15573	0.977195	0.873319	0.707465	0.997582	0.977609	0.997331	0.901424	0.352249	0.844111	0.00359705	0.252243	0.426883	0.469114	0.32367	0.682287	0.967214	0.0218144	0.998622	0.842627	0.957632	0.774437	0.638395	0.327134	0.58769	0.999932	0.862869	1	0.270445	0.455571	0.903671	0.744347	0.778401	0.999441	0.968346	0.822183	0.11085	0.985085	0.995606	0.609155	0.526611	0.841881	0.256245
Mturn	0.126092	0.372679	0.850887	0.779139	0.395295	0.86883	0.447549	0.922239	0.874038	0.950938	0.997582	0.953233	0.997331	0.902588	0.0485777	0.164472	0.217544	0.882586	0.986289	0.492115	0.560679	0.439319	0.582151	0.400336	0.998622	0.998301	0.959946	0.875188	0.620342	0.476961	0.485944	0.999932	0.925959	1	0.229919	0.203641	0.653493	0.731011	0.59944	0.999441	0.098826	0.651982	0.706428	0.526208	0.995606	0.911065	0.862594	0.956884	0.538199
Wdr55	0.381709	0.356884	0.374149	0.446194	0.506212	0.90845	0.34301	0.92284	0.873319	0.702144	0.997582	0.966195	0.997331	0.901424	0.331772	0.141936	0.0182082	0.254523	0.459552	0.762562	0.31935	0.674742	0.551778	0.0731754	0.998622	0.847548	0.981634	0.772711	0.890793	0.473106	0.923455	0.999932	0.925959	1	0.952872	0.155693	0.879527	0.988391	0.53992	0.999441	0.270662	0.61587	0.241635	0.686224	0.995606	0.728867	0.687879	0.912379	0.537828
Zbtb8a	0.443047	0.00108038	0.136345	0.860242	0.0619823	0.333305	0.129421	0.939888	0.03906	0.513169	0.997582	0.953233	0.997331	0.901424	0.828981	3.37745e-05	0.0164733	0.221634	0.0368112	0.00376104	0.0442369	0.942708	0.00170805	0.0680408	0.998622	0.530714	0.285111	0.440962	0.565284	0.00620092	0.419929	0.999932	0.19107	1	0.316089	0.000353033	0.092774	0.745029	0.0145487	0.999441	0.075167	0.0621442	0.190273	0.495122	0.888979	0.678062	0.645263	0.912379	0.0516717
Ndufaf7	0.783592	0.328958	0.932383	0.60185	0.197602	0.627308	0.929157	0.987567	0.864227	0.975444	0.997582	0.953233	0.997331	0.990156	0.807447	0.454813	0.899107	0.803488	0.14732	0.783823	0.409885	0.934209	0.807259	0.946429	0.998622	0.698686	0.983492	0.806177	0.362596	0.334172	0.772692	0.999932	0.863455	1	0.277547	0.403248	0.513768	0.744347	0.743283	0.999441	0.402374	0.664136	0.611562	0.750793	0.995606	0.880169	0.804816	0.942998	0.334008
Puf60	0.454837	0.677739	0.277463	0.808694	0.665353	0.451916	0.499131	0.944824	0.950255	0.649431	0.997582	0.977609	0.997331	0.913567	0.767099	0.8394	0.196577	0.804368	0.105057	0.62706	0.494114	0.919091	0.965204	0.374433	0.998622	0.657791	0.972637	0.843787	0.796878	0.423402	0.538156	0.999932	0.899357	1	0.0984745	0.62954	0.475408	0.631403	0.866182	0.999441	0.409072	0.800477	0.736356	0.754373	0.995606	0.919188	0.349784	0.772425	0.768353
Wdr75	0.472847	0.932248	0.487001	0.850213	0.430778	0.995479	0.119471	0.94577	0.992776	0.774239	0.997582	0.955323	0.999056	0.901424	0.642033	0.590371	0.52316	0.644629	0.628791	0.56825	0.141534	0.851519	0.862271	0.685872	0.998622	0.90737	0.968564	0.62755	0.338882	0.931216	0.271679	0.999932	0.988291	1	0.368668	0.378318	0.37886	0.759684	0.728973	0.999441	0.936014	0.918254	0.263359	0.971241	0.995606	0.742088	0.192171	0.764055	0.991907
Klhdc10	0.263121	0.108592	0.544103	0.613498	0.0900342	0.644307	0.720463	0.922239	0.665471	0.80492	0.997582	0.953233	0.997331	0.952814	0.0806792	0.413145	0.182425	0.732682	0.288695	0.835107	0.884242	0.491819	0.780546	0.35621	0.998622	0.790112	0.988474	0.9742	0.720381	0.0740508	0.477314	0.999932	0.625304	1	0.463556	0.486212	0.734761	0.823032	0.79599	0.999441	0.110397	0.467931	0.950487	0.538498	0.990195	0.988378	0.924028	0.96926	0.323423
Carnmt1	0.399774	0.316138	0.058728	0.804093	0.119822	0.404792	0.0691398	0.923029	0.86341	0.362948	0.997582	0.953233	0.997331	0.901424	0.190358	0.0623223	0.582778	0.764398	0.162927	0.754856	0.0428719	0.590978	0.369121	0.730999	0.998622	0.712736	0.981634	0.434842	0.674486	0.942809	0.376573	0.999932	0.988519	1	0.899637	0.353631	0.328149	0.980711	0.713855	0.999441	0.021913	0.0955958	0.0419574	0.424825	0.972364	0.485478	0.153876	0.764055	0.387075
Mzt1	0.511574	0.412269	0.920219	0.374352	0.643352	0.397113	0.166894	0.947805	0.890023	0.972791	0.997582	0.977609	0.997331	0.901424	0.814354	0.557866	0.244149	0.246399	0.103401	0.567968	0.10981	0.936382	0.850446	0.429293	0.998622	0.656021	0.968564	0.576864	0.906847	0.31397	0.796771	0.999932	0.858964	1	0.182414	0.454483	0.861743	0.692817	0.778098	0.999441	0.344841	0.931608	0.0698961	0.72645	0.995606	0.552061	0.998525	0.999382	0.710377
Mtfr1l	0.571422	0.664606	0.601861	0.303672	0.121264	0.888981	0.0349341	0.948409	0.949109	0.828946	0.997582	0.953233	0.997331	0.901424	0.0619917	0.505378	0.321778	0.0328496	0.318957	0.293911	0.0478776	0.464471	0.830054	0.507928	0.998622	0.802698	0.955487	0.449725	0.547929	0.64391	0.501208	0.999932	0.954318	1	0.324408	0.143512	0.702601	0.750784	0.527557	0.999441	0.123989	0.788345	0.0249791	0.561732	0.995606	0.439922	0.388181	0.772425	0.229456
Slc10a7	0.67535	0.668718	0.685449	0.861724	0.476626	0.306751	0.652574	0.969716	0.949323	0.8752	0.997582	0.965358	0.997331	0.940065	0.344404	0.227673	0.17554	0.99514	0.783741	0.564437	0.73032	0.678789	0.664222	0.347604	0.999946	0.957672	0.968564	0.928512	0.817708	0.627631	0.62341	0.999932	0.947851	1	0.50542	0.508175	0.700157	0.834944	0.807375	0.999441	0.475677	0.382144	0.851109	0.794291	0.990195	0.960888	0.855265	0.956884	0.648082
Tmem185b	0.0333068	0.184473	0.136269	0.472112	0.582433	0.813732	0.316538	0.866626	0.777597	0.513169	0.997582	0.973311	0.997331	0.901424	0.171533	0.430115	0.0709054	0.14164	0.114093	0.576397	0.759898	0.580188	0.790034	0.190923	0.998622	0.671557	0.968564	0.940617	0.311257	0.341857	0.894624	0.999932	0.86485	1	0.951063	0.981376	0.393787	0.987842	0.995314	0.999441	0.0276578	0.381213	0.1455	0.426166	0.990195	0.638946	0.514776	0.832267	0.84791
Rnf181	0.564297	0.182999	0.666065	0.892166	0.853357	0.58346	0.343997	0.947805	0.777597	0.864848	0.997582	0.992504	0.997331	0.901424	0.369055	0.0817832	0.382775	0.747662	0.222287	0.55556	0.189435	0.691524	0.427851	0.559182	0.998622	0.753793	0.965957	0.675527	0.709499	0.303247	0.571017	0.999932	0.858964	1	0.195194	0.204301	0.396136	0.702779	0.600817	0.999441	0.484001	0.269211	0.202015	0.794754	0.990195	0.690002	0.653832	0.912379	0.907812
Chtop	0.315748	0.825036	0.083395	0.0564486	0.350717	0.692307	0.545966	0.922239	0.985535	0.419205	0.997582	0.953233	0.997331	0.923474	0.195865	0.336575	0.796169	0.357933	0.822044	0.159801	0.214296	0.591306	0.736457	0.885435	0.998622	0.967317	0.946526	0.693076	0.909684	0.921728	0.20604	0.999932	0.988291	1	0.48864	0.105177	0.832462	0.831915	0.461237	0.999441	0.266591	0.679892	0.161256	0.684078	0.995606	0.64674	0.36135	0.772425	0.479479
Wipi2	0.965329	0.994874	0.514331	0.725684	0.350037	0.279696	0.622252	0.996921	0.998379	0.789212	0.997582	0.953233	0.997331	0.934426	0.668996	0.949013	0.117896	0.367969	0.183402	0.343107	0.898628	0.865503	0.999044	0.2701	0.998622	0.724903	0.955487	0.97798	0.506201	0.494287	0.923507	0.999932	0.930711	1	0.188696	0.64859	0.595088	0.698028	0.876479	0.999441	0.516563	0.40453	0.563755	0.795049	0.990195	0.860778	0.35012	0.772425	0.536088
Fryl	0.297285	0.795214	0.184615	0.17468	0.488829	0.214836	0.259361	0.922239	0.979841	0.574438	0.997582	0.965358	0.997331	0.901424	0.593825	0.776955	0.996987	0.0406665	0.136583	0.463227	0.569859	0.821842	0.936111	0.998474	0.998622	0.695259	0.957632	0.878524	0.787016	0.34587	0.81117	0.999932	0.86556	1	0.599424	0.871742	0.215645	0.867889	0.970064	0.999441	0.214411	0.434738	0.078535	0.654305	0.990195	0.568724	0.405595	0.772425	0.23783
Rsad2	0.735946	0.294384	0.248914	0.675581	0.471971	0.138538	0.870665	0.979216	0.85047	0.624606	0.997582	0.964463	0.997331	0.982576	0.295026	0.294021	3.72404e-08	0.231945	0.0330786	0.672077	0.475979	0.660245	0.714844	2.04713e-06	0.998622	0.508043	0.977763	0.834895	0.540273	0.186616	0.737645	0.999932	0.808609	1	0.0336749	0.796986	0.165407	0.521514	0.949833	0.999441	0.560176	0.395172	0.728957	0.807148	0.990195	0.918942	0.332601	0.772425	0.621577
Eef1akmt1	0.885456	0.652557	0.666501	0.645124	0.412744	0.123477	0.480458	0.993268	0.945347	0.864988	0.997582	0.955323	0.997331	0.908628	0.413851	0.343464	0.714919	0.965498	0.962166	0.0993147	0.128687	0.720408	0.742369	0.831713	0.998895	0.997109	0.899663	0.605377	0.531433	0.473176	0.888238	0.999932	0.925959	1	0.548081	0.577526	0.181581	0.84645	0.839377	0.999441	0.573337	0.134277	0.37222	0.816522	0.990195	0.78583	0.248859	0.772425	0.252591
Tmem234	0.238947	0.206436	0.557993	0.974472	0.805463	0.612346	0.157999	0.922239	0.797248	0.809083	0.997582	0.986099	0.997331	0.901424	0.713441	0.0756558	0.355961	0.561579	0.0843945	0.690124	0.0424744	0.890678	0.411316	0.536137	0.998622	0.630688	0.980287	0.433904	0.585281	0.624567	0.419572	0.999932	0.947074	1	0.147366	0.399627	0.123012	0.658987	0.740319	0.999441	0.187439	0.128968	0.181779	0.628474	0.990195	0.671833	0.130517	0.741388	0.573041
2510009E07Rik	0.146042	0.426242	0.166654	0.648344	0.282597	0.970698	0.87282	0.922239	0.897119	0.559682	0.997582	0.953233	0.997331	0.982576	0.00444623	0.515769	0.808408	0.517935	0.936895	0.109293	0.18903	0.22964	0.834114	0.893584	0.998622	0.994558	0.90873	0.675106	0.687159	0.502569	0.808551	0.999932	0.931186	1	0.000272705	0.00360565	0.00772858	0.0985513	0.0692815	0.999441	0.134463	0.5863	0.711289	0.573541	0.995606	0.912284	0.27067	0.772425	0.265411
Ube2f	0.171411	0.156752	0.287263	0.699186	0.253794	0.885827	0.492128	0.922239	0.747193	0.65669	0.997582	0.953233	0.997331	0.911887	0.208325	0.00998836	0.797584	0.865476	0.264934	0.350504	0.794252	0.603655	0.134707	0.885992	0.998622	0.773634	0.955487	0.948903	0.866137	0.359111	0.434087	0.999932	0.86923	1	0.938347	0.0133009	0.895208	0.986004	0.155249	0.999441	0.0971708	0.336115	0.825323	0.526208	0.990195	0.951561	0.79176	0.942998	0.739846
Cactin	0.730791	0.776953	0.767889	0.073877	0.638691	0.533031	0.0846808	0.979206	0.978525	0.917654	0.997582	0.977609	0.997331	0.901424	0.263743	0.357362	0.132002	0.161126	0.054214	0.872744	0.0106129	0.64296	0.751627	0.290614	0.998622	0.591338	0.994128	0.289189	0.967516	0.545305	0.899487	0.999932	0.933345	1	0.0359798	0.573341	0.468717	0.522514	0.838513	0.999441	0.538617	0.76796	0.0118084	0.797235	0.995606	0.38887	0.32819	0.772425	0.332248
Rwdd3	0.462377	0.224955	0.532077	0.709233	0.018869	0.504445	0.91117	0.94577	0.808633	0.798838	0.997582	0.953233	0.997331	0.987385	0.80249	0.464852	0.0876177	0.0978618	0.125761	0.759054	0.220381	0.933097	0.809787	0.220734	0.998622	0.6881	0.981634	0.697095	0.0251818	0.114821	0.707637	0.999932	0.714144	1	0.273084	0.247701	0.0219133	0.744347	0.648302	0.999441	0.286616	0.687012	0.888102	0.691408	0.995606	0.968901	0.689616	0.912379	0.236713
Nsmce1	0.577218	0.551805	0.0546392	0.443406	0.734843	0.966173	0.445149	0.948409	0.929315	0.350997	0.997582	0.979323	0.997331	0.902322	0.757667	0.243023	0.699361	0.354614	0.618215	0.783843	0.364265	0.913766	0.680696	0.820723	0.998622	0.905791	0.983492	0.790868	0.530995	0.678417	0.969069	0.999932	0.962863	1	0.399104	0.183692	0.902823	0.781123	0.577247	0.999441	0.874531	0.660721	0.303749	0.957349	0.995606	0.756835	0.123802	0.741388	0.500344
Rps19bp1	0.352162	0.324706	0.381137	0.315568	0.34743	0.361937	0.448665	0.922239	0.864227	0.705096	0.997582	0.953233	0.997331	0.902959	0.105098	0.0141401	0.405517	0.341075	0.219099	0.37906	0.0201679	0.521355	0.164501	0.579134	0.998622	0.753091	0.955487	0.343439	0.352629	0.322395	0.366125	0.999932	0.861162	1	0.0294928	0.022369	0.349279	0.50421	0.211023	0.999441	0.946806	0.371566	0.0353303	0.975032	0.990195	0.471545	0.339561	0.772425	0.362165
2510039O18Rik	0.60349	0.64398	0.000353999	0.0852829	0.766486	0.448283	0.682961	0.949173	0.945347	0.0196613	0.997582	0.981399	0.997331	0.944481	0.740597	0.611884	0.0543114	0.314782	0.211724	0.880672	0.143041	0.904811	0.872925	0.159008	0.998622	0.748465	0.994911	0.628798	0.848254	0.436117	0.380819	0.999932	0.908192	1	0.286781	0.941474	0.831843	0.744347	0.982985	0.999441	0.516323	0.775359	0.0896778	0.795049	0.995606	0.582317	0.0475073	0.741388	0.288452
Prcp	0.784322	0.929919	0.226079	0.729911	0.750017	0.380845	0.287569	0.987567	0.992776	0.608226	0.997582	0.980091	0.997331	0.901424	0.520088	0.852753	0.199587	0.166192	0.994986	0.373866	0.735973	0.788449	0.970685	0.377868	0.998622	0.99885	0.955487	0.930638	0.983623	0.615843	0.641869	0.999932	0.946746	1	0.629134	0.630666	0.377712	0.881853	0.867061	0.999441	0.666273	0.458716	0.302465	0.873611	0.990195	0.756326	0.170338	0.764055	0.898415
Ccdc159	0.979839	0.0537009	0.18936	0.728655	0.352279	0.689819	0.372482	0.998467	0.506507	0.580095	0.997582	0.953233	0.997331	0.901424	0.366966	0.287918	0.192574	0.972525	0.833855	0.621698	0.502625	0.691002	0.711564	0.369052	0.998895	0.969951	0.972637	0.848641	0.475491	0.102639	0.392451	0.999932	0.69138	1	0.635662	0.590652	0.590825	0.883925	0.843943	0.999441	0.448053	0.33369	0.67706	0.779324	0.990195	0.907085	0.68523	0.912379	0.996436
Pomp	0.626898	0.455204	0.371975	0.465963	0.746706	0.461994	0.0589533	0.953688	0.90969	0.701136	0.997582	0.979323	0.997331	0.901424	0.885456	0.188326	0.841772	0.467969	0.180645	0.19376	0.0183408	0.962748	0.612191	0.913385	0.998622	0.724266	0.955487	0.335074	0.923289	0.343811	0.470558	0.999932	0.86485	1	0.326486	0.0371968	0.227309	0.751548	0.275582	0.999441	0.523907	0.970174	0.0528324	0.795049	0.997347	0.520895	0.997539	0.999144	0.138421
Fam32a	0.357676	0.13153	0.789704	0.585483	0.503094	0.586812	0.3461	0.922239	0.708463	0.929068	0.997582	0.965907	0.997331	0.901424	0.377212	0.96108	0.374884	0.35496	0.545919	0.331623	0.636787	0.696465	0.999044	0.552664	0.998622	0.87929	0.955487	0.902948	0.260133	0.117757	0.271496	0.999932	0.717894	1	0.280631	0.466023	0.271515	0.744347	0.784776	0.999441	0.843522	0.534976	0.767103	0.948777	0.995606	0.927734	0.792403	0.942998	0.141115
Lsm12	0.763575	0.0577015	0.910663	0.940377	0.0930715	0.689065	0.0385773	0.984016	0.521441	0.971209	0.997582	0.953233	0.997331	0.901424	0.277047	0.234808	0.383754	0.0906118	0.140933	0.187425	0.0408284	0.649494	0.672377	0.559964	0.998622	0.695259	0.955487	0.427349	0.258631	0.131842	0.230676	0.999932	0.73661	1	0.915781	0.704407	0.799314	0.983067	0.909559	0.999441	0.264789	0.196041	0.06652	0.683317	0.990195	0.545757	0.128837	0.741388	0.201555
Spdl1	0.472461	0.850968	0.246546	0.861496	0.775163	0.767296	0.560189	0.94577	0.987111	0.622577	0.997582	0.982277	0.997331	0.925779	0.21923	0.400048	0.965409	0.564845	0.759915	0.470027	0.91125	0.612971	0.770456	0.983087	0.998622	0.951437	0.957632	0.979139	0.724246	0.712088	0.577842	0.999932	0.97511	1	0.275257	0.248928	0.613338	0.744347	0.649352	0.999441	0.525168	0.942847	0.775945	0.795049	0.996237	0.929947	0.803837	0.942998	0.243334
Pef1	0.898212	0.062055	0.156345	0.204027	0.0924008	0.654298	0.32904	0.993268	0.534142	0.544787	0.997582	0.953233	0.997331	0.901424	0.391135	0.0557518	0.139203	0.0813898	0.141415	0.882744	0.262581	0.70713	0.348913	0.300117	0.998622	0.695259	0.994911	0.741133	0.284682	0.110151	0.793351	0.999932	0.702304	1	0.864193	0.0433919	0.446589	0.977124	0.30313	0.999441	0.256297	0.26579	0.0972664	0.679092	0.990195	0.591981	0.421297	0.772425	0.457041
Afap1	0.270779	0.499812	0.977424	0.372545	0.379136	0.758775	0.294154	0.922239	0.918801	0.990704	0.997582	0.953233	0.997331	0.901424	0.438707	0.123035	0.217746	0.410336	0.527721	0.74575	0.158725	0.739663	0.515846	0.400628	0.998622	0.872252	0.981634	0.640851	0.185942	0.755641	0.942205	0.999932	0.986829	1	0.304079	0.134059	0.648038	0.744474	0.514128	0.999441	0.882987	0.465349	0.180686	0.957627	0.990195	0.671088	0.415079	0.772425	0.782694
Rrp1b	0.514907	0.428218	0.685118	0.0397148	0.500985	0.492924	0.80497	0.947805	0.898427	0.874976	0.997582	0.965552	0.997331	0.96724	0.0988187	0.983028	0.757193	0.773708	0.993672	0.0761901	0.0561311	0.515316	0.999044	0.860361	0.998622	0.99885	0.883963	0.47449	0.957435	0.89001	0.146593	0.999932	0.987566	1	0.217849	0.231059	0.269104	0.724308	0.633391	0.999441	0.279875	0.20253	0.124947	0.691408	0.990195	0.629153	0.460201	0.793035	0.768577
Arl16	0.0604278	0.246285	0.180646	0.477999	0.940084	0.344721	0.762676	0.922239	0.82358	0.57069	0.997582	0.999856	0.997331	0.959726	0.179297	0.00240519	0.475037	0.16986	0.43715	0.754619	0.993665	0.583436	0.0501303	0.644444	0.998622	0.843854	0.981634	0.997992	0.288609	0.863808	0.78804	0.999932	0.987566	1	0.904321	0.0319185	0.376279	0.982008	0.255022	0.999441	0.0596652	0.0548307	0.327634	0.471897	0.848746	0.772598	0.15742	0.764055	0.762669
Ddrgk1	0.2684	0.115946	0.246954	0.337058	0.316063	0.111975	0.244825	0.922239	0.68185	0.622664	0.997582	0.953233	0.997331	0.901424	0.746005	0.0142544	0.00236134	0.792881	0.0544374	0.457742	0.143821	0.908439	0.165218	0.0158248	0.998622	0.592945	0.957393	0.628798	0.936757	0.991516	0.89586	0.999932	0.999594	1	0.0687766	0.255943	0.431825	0.598313	0.656163	0.999441	0.217444	0.0863741	0.233149	0.656224	0.938138	0.72319	0.16477	0.764055	0.147356
Prr5l	0.0284772	0.0659808	0.0809794	0.338163	0.688707	0.905547	0.518317	0.862875	0.54984	0.415506	0.997582	0.977609	0.997331	0.916112	0.292642	0.282927	0.26968	0.373654	0.385816	0.351697	0.371856	0.659356	0.708726	0.459238	0.998622	0.827963	0.955487	0.792424	0.15762	0.118554	0.769681	0.999932	0.717894	1	0.340916	0.298832	0.377078	0.754806	0.683148	0.999441	0.100302	0.309788	0.327552	0.526208	0.990195	0.772598	0.739395	0.928154	0.236496
Otud6b	0.306787	0.672534	0.304476	0.908917	0.593923	0.602552	0.705877	0.922239	0.949632	0.666596	0.997582	0.975595	0.997331	0.950607	0.983071	0.275699	0.96231	0.193683	0.0628459	0.319294	0.467558	0.994497	0.70359	0.981416	0.998622	0.608905	0.955487	0.832047	0.749205	0.581746	0.760869	0.999932	0.934769	1	0.118452	0.158202	0.149896	0.643761	0.541347	0.999441	0.186036	0.884901	0.815881	0.627708	0.995606	0.948997	0.860556	0.956884	0.553993
Mfsd11	0.875383	0.63229	0.84294	0.734066	0.903579	0.0440274	0.501256	0.993268	0.942724	0.950159	0.997582	0.998899	0.997331	0.913829	0.10737	0.183315	0.919789	0.878239	0.105629	0.210871	0.276876	0.521355	0.604945	0.958969	0.998622	0.659313	0.955487	0.75395	0.867251	0.314274	0.855376	0.999932	0.858964	1	0.0373	0.796629	0.445852	0.52549	0.949833	0.999441	0.962978	0.0728828	0.447375	0.983387	0.905253	0.808759	0.394051	0.772425	0.577711
Ccdc71	0.406107	0.968721	0.9342	0.943609	0.72554	0.666259	0.348815	0.925207	0.995945	0.975444	0.997582	0.977668	0.997331	0.901424	0.553548	0.570737	0.162944	0.584766	0.96865	0.355922	0.463808	0.801133	0.853574	0.331245	0.998622	0.998069	0.955487	0.830123	0.48098	0.776443	0.621957	0.999932	0.987566	1	0.678685	0.365694	0.93048	0.908626	0.719726	0.999441	0.667108	0.713354	0.327662	0.874045	0.995606	0.772598	0.807591	0.943227	0.895052
Ccdc80	0.0101028	0.494743	6.31e-06	0.706485	0.818843	0.0483777	0.281018	0.730511	0.917454	0.00144596	0.997582	0.989513	0.997331	0.901424	0.00389348	0.033286	0.723963	0.361621	0.386966	0.00236937	0.825895	0.217849	0.272788	0.838705	0.998622	0.828701	0.22497	0.957973	0.0212356	0.0134263	0.0818501	0.999932	0.292463	1	0.0167667	0.00124024	0.430406	0.451598	0.0343754	0.999441	0.143024	0.38793	0.633747	0.587251	0.990195	0.888549	0.00231941	0.349407	0.107505
Faap20	0.338252	0.831292	0.159816	0.109084	0.541397	0.905605	0.377915	0.922239	0.985535	0.548114	0.997582	0.970282	0.997331	0.901424	0.611551	0.455376	0.465153	0.205445	0.467707	0.60798	0.739686	0.83096	0.807613	0.634331	0.998622	0.849082	0.968926	0.931045	0.34792	0.812595	0.132749	0.999932	0.987566	1	0.333343	0.398341	0.276903	0.753353	0.739245	0.999441	0.760398	0.935848	0.560799	0.924078	0.996202	0.86062	0.190089	0.764055	0.615785
2610002M06Rik	0.874732	0.202269	0.900721	0.770891	0.951224	0.154612	0.746554	0.993268	0.796105	0.967521	0.997582	0.999856	0.997331	0.9573	0.347582	0.35638	0.295561	0.238922	0.607408	0.575235	0.70747	0.680539	0.750274	0.484695	0.998622	0.903567	0.968564	0.92454	0.910125	0.0483333	0.994429	0.999932	0.520124	1	0.126282	0.16642	0.153268	0.652383	0.553698	0.999441	0.913171	0.874353	0.687255	0.963305	0.995606	0.907085	0.678915	0.912379	0.366748
Jmjd8	0.00811128	0.105229	0.295498	0.476298	0.0843114	0.0752779	0.249155	0.691958	0.655798	0.660951	0.997582	0.953233	0.997331	0.901424	0.407885	0.0235399	0.733073	0.578863	0.00334436	0.0328589	0.33461	0.716732	0.221642	0.845612	0.998622	0.293804	0.776317	0.77769	0.325163	0.00802818	0.779729	0.999932	0.219967	1	0.0668473	0.00408168	0.906257	0.594865	0.0757589	0.999441	0.0159669	0.833687	0.272484	0.402894	0.995606	0.742088	0.0737689	0.741388	0.276735
Ddx17	0.0691416	0.447698	0.0621942	0.748483	0.256921	0.121254	0.207123	0.922239	0.904849	0.373531	0.997582	0.953233	0.997331	0.901424	0.0280845	0.642574	0.0151093	0.413381	0.0503648	0.286929	0.169542	0.366659	0.88696	0.063635	0.998622	0.587381	0.955487	0.651783	0.601247	0.161151	0.585413	0.999932	0.778662	1	0.729083	0.44964	0.773984	0.93267	0.77477	0.999441	0.0173873	0.455132	0.156639	0.411514	0.990195	0.645784	0.0707702	0.741388	0.453673
Trub1	0.108597	0.656512	0.8208	0.591058	0.185419	0.698298	0.40624	0.922239	0.946641	0.941836	0.997582	0.953233	0.997331	0.901424	0.095508	0.858317	0.0930285	0.377917	0.120131	0.58188	0.445979	0.513308	0.973215	0.230332	0.998622	0.681905	0.968564	0.822485	0.793416	0.913369	0.862353	0.999932	0.987566	1	0.885999	0.967306	0.968877	0.980091	0.990454	0.999441	0.0345261	0.475343	0.295301	0.432389	0.990195	0.756241	0.214796	0.772425	0.98927
Mrto4	0.161268	0.882238	0.367396	0.0478282	0.929545	0.225208	0.197129	0.922239	0.991669	0.699598	0.997582	0.999856	0.997331	0.901424	0.0019981	0.160234	0.934649	0.0378364	0.0730782	0.954932	0.120072	0.187648	0.578129	0.967528	0.998622	0.627513	0.998116	0.591664	0.423195	0.545554	0.598463	0.999932	0.933345	1	0.0056861	0.297728	0.592342	0.410348	0.683148	0.999441	0.183899	0.220289	0.00820961	0.626042	0.990195	0.386631	0.470035	0.798059	0.590238
Kmt2b	0.988881	0.438858	0.0270133	0.558345	0.691092	0.0405634	0.96722	0.998679	0.903079	0.248776	0.997582	0.977609	0.997331	0.996284	0.659682	0.509052	0.0414236	0.406282	0.47538	0.217476	0.916985	0.860654	0.831647	0.131637	0.998622	0.854503	0.955487	0.979139	0.810779	0.0640542	0.648157	0.999932	0.589023	1	0.292923	0.535066	0.433309	0.744347	0.818529	0.999441	0.795774	0.315449	0.693836	0.936391	0.990195	0.907472	0.0193076	0.574308	0.951189
Pbrm1	0.530866	0.91276	0.536629	0.879851	0.723028	0.657015	0.438136	0.947805	0.991833	0.801155	0.997582	0.977609	0.997331	0.901424	0.709043	0.591892	0.728502	0.476156	0.890052	0.806184	0.066018	0.887957	0.86304	0.841841	0.998622	0.987546	0.985168	0.5017	0.527329	0.848548	0.69764	0.999932	0.987566	1	0.724927	0.756937	0.0367249	0.931103	0.934754	0.999441	0.841096	0.644486	0.461354	0.948777	0.995606	0.810508	0.261085	0.772425	0.949136
Dph3	0.433558	0.501021	0.535692	0.504335	0.588993	0.770798	0.145736	0.933664	0.919505	0.800672	0.997582	0.975267	0.997331	0.901424	0.311983	0.155811	0.927924	0.248574	0.254729	0.797186	0.0251213	0.671392	0.572566	0.963597	0.998622	0.768782	0.985168	0.37108	0.886664	0.833842	0.680169	0.999932	0.987566	1	0.917611	0.444072	0.49233	0.983289	0.770346	0.999441	0.138045	0.300688	0.0246012	0.580542	0.990195	0.439922	0.311679	0.772425	0.575297
Tdrp	0.786221	0.166728	0.801398	0.350243	0.778266	0.0555181	0.484845	0.987567	0.760609	0.93444	0.997582	0.983105	0.997331	0.910108	0.0681979	0.108883	0.239503	0.650453	0.141939	0.0410842	0.410836	0.474157	0.490418	0.42405	0.998622	0.695259	0.793735	0.806218	0.94631	0.00475006	0.747954	0.999932	0.160805	1	0.047702	0.0214544	0.788281	0.553591	0.2057	0.999441	0.723353	0.695718	0.359908	0.909695	0.995606	0.784165	0.480652	0.806905	0.615224
Srsf11	0.877608	0.51177	0.0613588	0.453772	0.495877	0.179733	0.306428	0.993268	0.922022	0.371547	0.997582	0.965358	0.997331	0.901424	0.485866	0.922207	0.844775	0.563904	0.954942	0.545863	0.262472	0.769655	0.994331	0.914954	0.998622	0.996192	0.965424	0.741133	0.73783	0.15711	0.883251	0.999932	0.770626	1	0.669978	0.729219	0.734566	0.902725	0.920438	0.999441	0.577446	0.625752	0.232273	0.819019	0.995606	0.721949	0.183879	0.764055	0.703402
Cnpy4	0.480949	0.607291	0.215988	0.114558	0.369848	0.765361	0.86125	0.947805	0.937056	0.600853	0.997582	0.953233	0.997331	0.981201	0.108654	0.556886	0.361834	0.731657	0.918649	0.80407	0.045775	0.521626	0.85007	0.541599	0.998622	0.989408	0.985168	0.446868	0.886224	0.882477	0.298123	0.999932	0.987566	1	0.259205	0.8247	0.0960134	0.744347	0.958962	0.999441	0.261487	0.614244	0.243911	0.682291	0.995606	0.730683	0.352249	0.772425	0.240548
Zfp157	0.417872	0.950242	0.112125	0.970312	0.866511	0.228845	0.618467	0.929922	0.993072	0.472295	0.997582	0.993079	0.997331	0.933311	0.672967	0.107296	0.130177	0.475399	0.511889	0.945554	0.962704	0.868702	0.486534	0.287853	0.998622	0.865992	0.996665	0.992846	0.649467	0.407586	0.761234	0.999932	0.893645	1	0.777426	0.216153	0.470706	0.956176	0.615104	0.999441	0.475304	0.382153	0.687594	0.79424	0.990195	0.907085	0.0680682	0.741388	0.951061
Rexo5	0.363833	0.233404	0.597627	0.961014	0.297087	0.301502	0.917117	0.922239	0.81335	0.826249	0.997582	0.953233	0.997331	0.987385	0.8247	0.452057	0.637879	0.347965	0.0501985	0.110784	0.415276	0.940883	0.805942	0.773655	0.998622	0.586175	0.90873	0.80803	0.91312	0.903194	0.915674	0.999932	0.987566	1	0.126172	0.467841	0.271615	0.652383	0.784815	0.999441	0.163817	0.140134	0.966516	0.60409	0.990195	0.991164	0.886104	0.957362	0.240344
Gdpd1	0.239999	0.0887364	0.0340321	0.71909	0.335472	0.764402	0.681644	0.922239	0.623385	0.280616	0.997582	0.953233	0.997331	0.943799	0.447508	3.81136e-07	0.00166208	0.532427	0.780539	0.00340054	0.141549	0.744479	3.89422e-05	0.0121113	0.998622	0.95711	0.270891	0.62755	0.272072	0.401842	0.964151	0.999932	0.890679	1	0.304742	4.59953e-05	0.251936	0.744474	0.00313168	0.999441	0.668421	0.0137685	0.320718	0.87472	0.477877	0.767323	0.243539	0.772425	0.215473
Ltv1	0.678865	0.387372	0.425803	0.672923	0.3864	0.877149	0.040733	0.970692	0.879637	0.731326	0.997582	0.953233	0.997331	0.901424	0.427037	0.992567	0.438296	0.151678	0.473225	0.475293	0.220363	0.731412	0.999044	0.61064	0.998622	0.853443	0.957632	0.697095	0.730932	0.472989	0.252906	0.999932	0.925959	1	0.857967	0.532184	0.785308	0.977124	0.816925	0.999441	0.375208	0.672881	0.0971257	0.731124	0.995606	0.591981	0.804763	0.942998	0.0370634
Nkap	0.242432	0.350013	0.0845792	0.954712	0.205652	0.863058	0.335125	0.922239	0.872291	0.422221	0.997582	0.953233	0.997331	0.901424	0.15792	0.116452	0.243154	0.6139	0.312173	0.740907	0.604149	0.571328	0.505611	0.428264	0.998622	0.801808	0.981634	0.892223	0.948872	0.567797	0.491491	0.999932	0.933345	1	0.766505	0.155553	0.933016	0.951058	0.53992	0.999441	0.133192	0.537101	0.508976	0.572291	0.995606	0.834828	0.449893	0.78632	0.784995
Lysmd1	0.216969	0.700643	0.981462	0.00639566	0.208402	0.91478	0.00831558	0.922239	0.959744	0.992645	0.997582	0.953233	0.997331	0.901424	0.0887093	0.622608	3.37751e-05	0.0152613	0.228378	0.655392	0.000611655	0.504762	0.877173	0.00054985	0.998622	0.755083	0.975314	0.228914	0.94402	0.664287	0.779061	0.999932	0.959206	1	0.463652	0.634628	0.394427	0.823032	0.868799	0.999441	0.124456	0.873011	0.0021151	0.561937	0.995606	0.372674	0.493656	0.815885	0.0873893
Noa1	0.35514	0.601161	0.0194096	0.899351	0.441349	0.875285	0.692732	0.922239	0.937056	0.207618	0.997582	0.956353	0.997331	0.946465	0.840067	0.0581637	2.68039e-05	0.889393	0.0304793	0.352191	0.684505	0.947376	0.35758	0.000456444	0.998622	0.505416	0.955487	0.916965	0.905662	0.686027	0.87829	0.999932	0.96597	1	0.0435625	0.0602684	0.952664	0.545827	0.352931	0.999441	0.182105	0.81867	0.66743	0.623913	0.995606	0.907056	0.28928	0.772425	0.555024
Eva1b	0.468078	0.375477	0.672112	0.98738	0.665983	0.730621	0.46573	0.94577	0.874983	0.868167	0.997911	0.977609	0.997331	0.908066	0.319258	0.510412	0.635807	0.266197	0.811186	0.603358	0.73907	0.6724	0.832451	0.772269	0.998622	0.965008	0.968564	0.930918	0.785444	0.661972	0.630044	0.999932	0.959206	1	0.510376	0.870064	0.306347	0.834944	0.970064	0.999441	0.456427	0.399625	0.591432	0.785678	0.990195	0.874135	0.840589	0.953741	0.565306
Nop9	0.811111	0.582662	0.560007	0.456152	0.635788	0.194689	0.107323	0.987845	0.932739	0.809991	0.997582	0.977609	0.997331	0.901424	0.320174	0.351736	0.293436	0.577967	0.508849	0.285621	0.667812	0.6724	0.747359	0.482644	0.998622	0.864465	0.955487	0.910477	0.604553	0.606499	0.0758067	0.999932	0.942983	1	0.153493	0.932964	0.868013	0.664617	0.980826	0.999441	0.894008	0.241094	0.546125	0.958777	0.990195	0.852357	0.204467	0.767331	0.143238
Polr2d	0.656025	0.932863	0.973482	0.141621	0.15541	0.156077	0.709091	0.96429	0.992776	0.988948	0.997582	0.953233	0.997331	0.951628	0.882699	0.683625	0.107913	0.704896	0.187028	0.121223	0.431092	0.96185	0.904423	0.254806	0.998622	0.726933	0.924832	0.812765	0.25403	0.37787	0.239671	0.999932	0.875587	1	0.312427	0.338447	0.834871	0.744572	0.706364	0.999441	0.400086	0.228131	0.393053	0.749295	0.990195	0.796455	0.973167	0.988728	0.208635
Zfp623	0.221214	0.752295	0.939932	0.770935	0.10274	0.725816	0.769334	0.922239	0.973122	0.977187	0.997582	0.953233	0.997331	0.960183	0.0434615	0.87956	0.15319	0.928173	0.239363	0.91039	0.447609	0.432224	0.982281	0.319145	0.998622	0.761681	0.996621	0.823229	0.786383	0.6822	0.996828	0.999932	0.964355	1	0.402757	0.97739	0.44643	0.7835	0.994125	0.999441	0.0665564	0.912745	0.708523	0.480791	0.995606	0.911457	0.229735	0.772425	0.596612
Pbdc1	0.0148551	0.18097	0.469518	0.764132	0.202309	0.728438	0.869246	0.779721	0.775703	0.764236	0.997582	0.953233	0.997331	0.982576	0.00318521	0.766506	0.0578816	0.52604	0.0781698	0.37817	0.379284	0.214312	0.931741	0.166337	0.998622	0.628886	0.955487	0.795151	0.00796061	0.168727	0.92992	0.999932	0.790871	1	0.00152689	0.518123	0.31969	0.293806	0.810892	0.999441	0.438548	0.498819	0.766551	0.77353	0.993877	0.927734	0.519665	0.8356	0.204473
Prpf6	0.119941	0.672168	0.858382	0.179011	0.316122	0.930462	0.290979	0.922239	0.949632	0.952785	0.997582	0.953233	0.997331	0.901424	0.290565	0.193296	0.399709	0.872583	0.417962	0.406668	0.114594	0.658624	0.61802	0.574201	0.998622	0.839202	0.955487	0.585424	0.596617	0.821474	0.741622	0.999932	0.987566	1	0.914911	0.184503	0.398341	0.983067	0.5778	0.999441	0.132424	0.781752	0.156322	0.571854	0.995606	0.645627	0.942493	0.975281	0.286771
2610033C09Rik	0.586843	0.727087	0.48451	0.967387	0.763045	0.142911	0.594679	0.948409	0.967523	0.772848	0.997582	0.981399	0.997331	0.930484	0.315338	0.915769	0.0135998	0.261052	0.822117	0.119762	0.754304	0.6724	0.993983	0.0592665	0.998622	0.967317	0.924832	0.937768	0.871967	0.259661	0.772067	0.999932	0.858964	1	0.453409	0.20189	0.20991	0.820092	0.5982	0.999441	0.503591	0.344764	0.632727	0.794754	0.990195	0.888292	0.821434	0.946483	0.296731
Nop14	0.512547	0.447544	0.110382	0.694583	0.537321	0.496378	0.687776	0.947805	0.904849	0.469843	0.997582	0.970282	0.997331	0.945722	0.531392	0.595998	0.0997296	0.648568	0.49756	0.515719	0.715968	0.792914	0.865065	0.241855	0.998622	0.860272	0.964094	0.927636	0.50347	0.477108	0.677774	0.999932	0.925959	1	0.521976	0.490587	0.68899	0.837376	0.799718	0.999441	0.349183	0.839901	0.630633	0.727848	0.995606	0.888292	0.460514	0.793287	0.339793
Med25	0.0991529	0.253939	0.321094	0.124699	0.349833	0.293732	0.575945	0.922239	0.828335	0.679436	0.997582	0.953233	0.997331	0.928578	0.323839	0.982615	0.114018	0.61326	0.122292	0.829648	0.15362	0.672673	0.999044	0.264177	0.998622	0.687242	0.987735	0.635296	0.527645	0.125047	0.456387	0.999932	0.728578	1	0.756823	0.718117	0.596024	0.947768	0.914533	0.999441	0.092476	0.971055	0.155999	0.523683	0.997528	0.645146	0.390041	0.772425	0.52528
Ints4	0.550087	0.719988	0.0663635	0.395791	0.543047	0.496221	0.75454	0.947805	0.965462	0.382007	0.997582	0.970282	0.997331	0.958229	0.705077	0.0757081	0.0808202	0.67115	0.502151	0.611576	0.872868	0.885467	0.411362	0.209171	0.998622	0.861826	0.970264	0.970819	0.99969	0.839418	0.461802	1	0.987566	1	0.759609	0.17705	0.88385	0.948972	0.568158	0.999441	0.306889	0.410446	0.676344	0.705977	0.990195	0.907085	0.251106	0.772425	0.853114
Tti1	0.333257	0.26765	0.204968	0.243554	0.864006	0.916747	0.215827	0.922239	0.837242	0.592635	0.997582	0.992504	0.997331	0.901424	0.176084	0.820497	0.00213698	0.181991	0.841289	0.424727	0.0970503	0.581932	0.955484	0.0147162	0.998622	0.97223	0.955487	0.562769	0.619024	0.431142	0.991015	0.999932	0.905234	1	0.33228	0.766986	0.854774	0.753353	0.938125	0.999441	0.357912	0.441983	0.0701651	0.728356	0.990195	0.552153	0.898469	0.959325	0.352696
Mis18a	0.945863	0.804689	0.0572949	0.67266	0.801595	0.27681	0.859528	0.995432	0.982719	0.358093	0.997582	0.986063	0.997331	0.981201	0.376492	0.852757	0.619212	0.988505	0.62591	0.40951	0.778553	0.695947	0.970685	0.758976	0.999529	0.906297	0.955487	0.943857	0.892798	0.365571	0.659597	0.999932	0.873844	1	0.304514	0.604045	0.816846	0.744474	0.851983	0.999441	0.818993	0.533521	0.867172	0.943498	0.995606	0.964793	0.0721147	0.741388	0.647585
Spata2l	0.376027	0.972526	0.915271	0.239024	0.327258	0.0344177	0.530664	0.922239	0.995984	0.972726	0.997582	0.953233	0.997331	0.917467	0.910447	0.150377	0.132992	0.734012	0.785725	0.110039	0.728406	0.972302	0.564789	0.291445	0.998622	0.957672	0.90873	0.928119	0.17171	0.141488	0.16672	0.999932	0.743683	1	0.0831361	0.139301	0.0867442	0.617598	0.521086	0.999441	0.932336	0.143914	0.72986	0.969667	0.990195	0.918942	0.207504	0.769541	0.346607
Lrrc40	0.961633	0.172605	0.187603	0.960701	0.839463	0.200706	0.980935	0.996603	0.76815	0.577808	0.997582	0.992448	0.997331	0.99669	0.0995437	0.468868	0.0204126	0.0595	0.120088	0.493399	0.626408	0.515762	0.811282	0.0794527	0.998622	0.681905	0.959946	0.900344	0.936065	0.178461	0.994678	0.999932	0.805561	1	0.85613	0.491011	0.287465	0.977124	0.799718	0.999441	0.0250779	0.825748	0.0700946	0.424825	0.995606	0.552061	0.393103	0.772425	0.166762
Sys1	0.86192	0.590134	0.374331	0.702867	0.456856	0.91594	0.776905	0.993268	0.934256	0.702198	0.997582	0.961316	0.997331	0.961635	0.373052	0.953067	0.36912	0.640028	0.931272	0.641258	0.710329	0.694432	0.999044	0.548314	0.998622	0.993726	0.972637	0.925575	0.644418	0.626654	0.601073	0.999932	0.947453	1	0.511642	0.647266	0.50168	0.834944	0.875872	0.999441	0.545333	0.824253	0.967949	0.799612	0.995606	0.991671	0.876521	0.956884	0.994784
2610044O15Rik	0.797719	0.0267478	0.348801	0.551143	0.839232	0.655014	0.75809	0.987845	0.358498	0.691663	0.997582	0.992448	0.997331	0.958676	0.761544	0.536062	0.79702	0.769275	0.932435	0.324123	0.606914	0.915922	0.842104	0.885683	0.998622	0.993726	0.955487	0.893307	0.873973	0.0411283	0.479679	0.999932	0.489271	1	0.824457	0.82127	0.570724	0.969795	0.958053	0.999441	0.840012	0.266229	0.868692	0.948777	0.990195	0.964795	0.292352	0.772425	0.994138
U2surp	0.527744	0.570348	0.939798	0.903029	0.355075	0.263549	0.278392	0.947805	0.931747	0.977187	0.997582	0.953233	0.997331	0.901424	0.458314	0.0857896	0.174451	0.884245	0.365362	0.0376735	0.14577	0.75186	0.440997	0.346835	0.998622	0.820646	0.792398	0.630949	0.25952	0.25173	0.492621	0.999932	0.858964	1	0.170359	0.0104102	0.205526	0.675399	0.132547	0.999441	0.798513	0.646835	0.41266	0.936854	0.995606	0.802001	0.0855112	0.741388	0.592319
Mtdh	0.125005	0.718555	0.60414	0.844998	0.172175	0.361394	0.71704	0.922239	0.965002	0.829591	0.997582	0.953233	0.997331	0.951726	0.243471	0.0513199	0.0319115	0.966071	0.0838236	0.0298115	0.726259	0.629904	0.333846	0.109999	0.998895	0.630688	0.741955	0.927636	0.842168	0.352797	0.63935	0.999932	0.866887	1	0.519893	0.00229593	0.618593	0.837031	0.0527446	0.999441	0.0846427	0.672745	0.921062	0.515197	0.995606	0.980127	0.13732	0.74457	0.833154
Atat1	0.199044	0.158266	0.178096	0.105609	0.210909	0.00149391	0.309849	0.922239	0.74984	0.56847	0.997582	0.953233	0.780152	0.901424	0.940944	0.298824	0.900926	0.225475	0.807072	0.226677	0.550782	0.981461	0.718029	0.947165	0.998622	0.964093	0.955487	0.870398	0.074686	0.00363795	0.0635405	0.999932	0.134097	1	0.973764	0.96443	0.193176	0.991926	0.98917	0.999441	0.942926	0.134271	0.684972	0.973023	0.990195	0.907085	0.00924092	0.486037	0.356166
Cluap1	0.369018	0.037213	0.397301	0.58755	0.0108276	0.939913	0.439393	0.922239	0.431511	0.71161	0.997582	0.953233	0.997331	0.901424	0.405829	0.165457	0.710753	0.818204	0.023431	0.556237	0.877224	0.715452	0.583816	0.828778	0.998622	0.470323	0.965957	0.972371	0.186702	0.126289	0.322021	0.999932	0.730309	1	0.28536	0.700209	0.957829	0.744347	0.908598	0.999441	0.0250581	0.238643	0.869543	0.424825	0.990195	0.965098	0.411058	0.772425	0.534744
Accs	0.0366372	0.841113	0.48629	0.90869	0.426448	0.0827026	0.851401	0.889897	0.985983	0.773969	0.997582	0.955323	0.997331	0.980499	0.0520555	0.179545	0.219248	0.490155	0.144698	0.172095	0.657394	0.447541	0.599256	0.401719	0.998622	0.697543	0.955487	0.908243	0.433628	0.398277	0.876234	0.999932	0.887599	1	0.800812	0.913774	0.551305	0.962942	0.977438	0.999441	0.0011417	0.0147038	0.893231	0.249475	0.488188	0.969631	0.881899	0.956884	0.00488173
Ramac	0.710146	0.418703	0.124403	0.147912	0.249609	0.0632353	0.205374	0.976132	0.893454	0.492894	0.997582	0.953233	0.997331	0.901424	0.0124814	0.158253	0.214952	0.371348	0.190953	0.794066	0.029578	0.313702	0.57658	0.397198	0.998622	0.731929	0.984659	0.388939	0.303946	0.0960947	0.867746	0.999932	0.682824	1	0.00398787	0.366249	0.35163	0.363565	0.720003	0.999441	0.500093	0.339422	0.0584626	0.794754	0.990195	0.535541	0.310301	0.772425	0.146067
Ccdc47	0.674969	0.461056	0.381707	0.530807	0.149289	0.634736	0.182776	0.969716	0.911297	0.705422	0.997582	0.953233	0.997331	0.901424	0.838836	0.0610174	0.921577	0.340158	0.0703505	0.729171	0.224696	0.947002	0.366027	0.959445	0.998622	0.62682	0.981634	0.699884	0.475378	0.888752	0.6546	0.999932	0.987566	1	0.163634	0.100281	0.967053	0.668817	0.452132	0.999441	0.184639	0.436388	0.172398	0.626042	0.990195	0.664246	0.537547	0.8501	0.391345
Inf2	0.14942	0.466037	0.245406	0.376265	0.587997	0.753695	0.42863	0.922239	0.9143	0.621448	0.997582	0.975267	0.997331	0.901424	0.394972	0.364395	0.000500828	0.872516	0.157855	0.503977	0.0540567	0.709108	0.755955	0.0046937	0.998622	0.70905	0.961343	0.469713	0.479932	0.762936	0.905622	0.999932	0.986918	1	0.55557	0.911621	0.0573657	0.846464	0.977026	0.999441	0.199045	0.513334	0.280551	0.638458	0.994986	0.746622	0.226636	0.772425	0.909666
Ntmt1	0.0809334	0.107797	9.23e-05	0.264765	0.161215	0.12656	0.014816	0.922239	0.662446	0.00867208	0.997582	0.953233	0.997331	0.901424	0.931569	0.856259	0.0709709	0.515221	0.636525	0.877055	0.491899	0.978042	0.972433	0.191044	0.998622	0.910256	0.994911	0.843505	0.0564023	0.0422626	0.0281082	0.999932	0.4953	1	0.762416	0.860259	0.979165	0.949595	0.967506	0.999441	0.766619	0.966719	0.237969	0.926165	0.99683	0.728799	0.286532	0.772425	0.00991338
Mpc2	0.235779	0.884834	0.466553	0.762759	0.366492	0.853131	0.57714	0.922239	0.991669	0.761834	0.997582	0.953233	0.997331	0.928578	0.741555	0.979694	0.196131	0.416344	0.556841	0.794222	0.965281	0.905628	0.999044	0.374038	0.998622	0.885014	0.984659	0.993387	0.139684	0.949831	0.866053	0.999932	0.989746	1	0.532063	0.86915	0.537109	0.838785	0.970064	0.999441	0.881901	0.855009	0.560923	0.957626	0.995606	0.86062	0.813867	0.945228	0.933773
Obi1	0.3219	0.396096	0.337343	0.367762	0.290242	0.442397	0.409477	0.922239	0.883019	0.68554	0.997582	0.953233	0.997331	0.901424	0.578341	0.635679	0.439395	0.149789	0.519698	0.0728637	0.262735	0.812816	0.883361	0.611626	0.998622	0.86971	0.881503	0.741133	0.313044	0.385529	0.377239	0.999932	0.879204	1	0.993178	0.0877259	0.044118	0.997672	0.425864	0.999441	0.479909	0.374914	0.851162	0.794754	0.990195	0.960888	0.913038	0.964571	0.877582
Smg1	0.582999	0.593617	0.0491859	0.916821	0.714463	0.334781	0.578898	0.948409	0.934256	0.336253	0.997582	0.977609	0.997331	0.928578	0.900045	0.947788	0.223029	0.90855	0.263107	0.452693	0.730995	0.96775	0.999044	0.406373	0.998622	0.772813	0.955487	0.928512	0.859932	0.29021	0.644515	0.999932	0.858964	1	0.327921	0.406995	0.907104	0.752233	0.745298	0.999441	0.544574	0.750214	0.746923	0.799612	0.995606	0.922769	0.12974	0.741388	0.905572
Aida	0.934828	0.228556	0.379435	0.318891	0.802635	0.347413	0.476444	0.995432	0.811371	0.704278	0.997582	0.986063	0.997331	0.908066	0.883521	0.476005	0.0141059	0.717977	0.720528	0.544675	0.119501	0.96228	0.815464	0.0608022	0.998622	0.942653	0.965098	0.590903	0.888115	0.216727	0.843211	0.999932	0.833224	1	0.824505	0.362277	0.489916	0.969795	0.718372	0.999441	0.930048	0.841299	0.0930152	0.969179	0.995606	0.586558	0.84591	0.95643	0.0751101
Lipt2	0.564738	0.584591	0.562011	0.761145	0.7469	0.708417	0.486931	0.947805	0.933264	0.811008	0.997582	0.979323	0.997331	0.911299	0.794295	0.55517	0.400722	0.336854	0.490228	0.738296	0.608565	0.928901	0.849421	0.575082	0.998622	0.859053	0.981634	0.894024	0.860768	0.519309	0.487629	0.999932	0.932406	1	0.773895	0.563321	0.265649	0.955143	0.834737	0.999441	0.525925	0.937667	0.764214	0.795125	0.996237	0.927734	0.794471	0.942998	0.998014
Snrnp27	0.813871	0.940247	0.344288	0.669729	0.773894	0.311414	0.867873	0.987845	0.993072	0.689017	0.997582	0.982121	0.997331	0.982576	0.26867	0.845401	0.524553	0.726867	0.122934	0.214688	0.398517	0.646276	0.967714	0.686675	0.998622	0.6881	0.955487	0.799927	0.984137	0.567138	0.846125	0.999932	0.933345	1	0.0717979	0.384473	0.467261	0.603207	0.73252	0.999441	0.690869	0.381973	0.641274	0.890037	0.990195	0.893226	0.30722	0.772425	0.844098
Cenpl	0.473965	0.232791	0.0430638	0.687096	0.934889	0.309013	0.756606	0.94577	0.81335	0.314285	0.997582	0.999856	0.997331	0.958515	0.459514	0.141405	0.608381	0.54879	0.770289	0.213405	0.843025	0.752457	0.550773	0.75089	0.998622	0.954417	0.955487	0.963953	0.641664	0.171145	0.946937	0.999932	0.796149	1	0.643402	0.0780121	0.769917	0.887985	0.40408	0.999441	0.559629	0.929384	0.564067	0.807089	0.995606	0.860778	0.0912465	0.741388	0.648977
Sap130	0.321158	0.995107	0.0384697	0.406425	0.602975	0.727164	0.57456	0.922239	0.9984	0.297626	0.997582	0.976381	0.997331	0.928303	0.177861	0.0737109	0.0310352	0.204731	0.00111352	0.096741	0.272579	0.582089	0.405669	0.107871	0.998622	0.218064	0.899663	0.750071	0.764372	0.860648	0.422219	0.999932	0.987566	1	0.00982423	0.017615	0.107295	0.43824	0.181149	0.999441	0.124114	0.691651	0.80272	0.561732	0.995606	0.942561	0.153888	0.764055	0.315911
Rprd1b	0.463499	0.0264041	0.180913	0.84643	0.321162	0.885925	0.243739	0.94577	0.355138	0.57069	0.997582	0.953233	0.997331	0.901424	0.560531	0.805563	0.0131761	0.259023	0.404234	0.056872	0.798355	0.804476	0.9478	0.0581208	0.998622	0.833087	0.832706	0.950568	0.21561	0.0753794	0.461985	0.999932	0.629443	1	0.301903	0.263578	0.405667	0.744474	0.661771	0.999441	0.92001	0.146673	0.385854	0.96481	0.990195	0.793988	0.0935327	0.741388	0.823939
Zfp979	0.0498152	0.119456	0.00455464	0.403868	0.177322	0.194514	0.291576	0.922239	0.688642	0.0957799	0.997582	0.953233	0.997331	0.901424	0.0467998	0.786352	3.71545e-05	0.639589	0.175177	0.0295244	0.184389	0.436427	0.940014	0.000588959	0.998622	0.719938	0.741955	0.670504	0.260965	0.508109	0.888019	0.999932	0.931186	1	0.233843	0.0556382	0.359898	0.734031	0.339245	0.999441	0.107504	0.137436	0.328607	0.535865	0.990195	0.772598	0.227842	0.772425	0.149977
Zc3h15	0.631256	0.959516	0.206677	0.333257	0.668787	0.832787	0.269321	0.95575	0.99366	0.59296	0.997582	0.977609	0.997331	0.901424	0.526261	0.81569	0.386911	0.285767	0.842379	0.739793	0.307412	0.790864	0.953312	0.562301	0.998622	0.97274	0.981634	0.766338	0.957588	0.856584	0.955235	0.999932	0.987566	1	0.776568	0.707742	0.937001	0.956176	0.909654	0.999441	0.556364	0.891234	0.195862	0.804997	0.995606	0.680697	0.770832	0.942998	0.350006
Dram2	0.942966	0.247957	0.218731	0.485036	0.389344	0.97219	0.467751	0.995432	0.823737	0.60366	0.997582	0.953233	0.997331	0.908066	0.339153	0.19029	0.424806	0.47293	0.744398	0.701936	0.701106	0.676517	0.615054	0.597492	0.998622	0.948792	0.981634	0.922753	0.552347	0.430643	0.992147	0.999932	0.905234	1	0.501785	0.300399	0.810609	0.834944	0.683562	0.999441	0.474977	0.454852	0.335293	0.794202	0.990195	0.777571	0.882987	0.956884	0.658734
Fnbp1l	0.660105	0.00858608	0.0303548	0.584211	0.341539	0.348189	0.142952	0.966203	0.184268	0.263467	0.997582	0.953233	0.997331	0.901424	0.431846	0.00436919	0.459867	0.594733	0.429572	0.217644	0.158222	0.735123	0.0770562	0.630204	0.998622	0.843298	0.955487	0.640535	0.857638	0.01802	0.194301	0.999932	0.32389	1	0.833244	0.00627961	0.177007	0.971428	0.097526	0.999441	0.394903	0.165557	0.419558	0.74432	0.990195	0.8044	0.0527064	0.741388	0.683916
Klhl22	0.785133	0.637388	0.881241	0.185591	0.648418	0.444208	0.0838985	0.987567	0.94398	0.961966	0.997582	0.977609	0.997331	0.901424	0.275612	0.572281	0.757825	0.194819	0.744026	0.811973	0.0627981	0.64864	0.853879	0.86054	0.998622	0.948792	0.985259	0.491919	0.932637	0.368998	0.817927	0.999932	0.873844	1	0.285753	0.543817	0.707198	0.744347	0.822289	0.999441	0.638531	0.819762	0.0474102	0.856846	0.995606	0.50013	0.393987	0.772425	0.227421
Pip4p2	0.851557	0.639495	0.000588769	0.281977	0.592962	0.191496	0.493712	0.992312	0.944124	0.0276721	0.997582	0.975595	0.997331	0.912664	0.295843	0.3424	0.583098	0.825324	0.0977233	0.22355	0.652712	0.660245	0.740574	0.731138	0.998622	0.650675	0.955487	0.906883	0.777136	0.539672	0.223417	0.999932	0.933345	1	0.0158455	0.677722	0.596889	0.451514	0.894553	0.999441	0.578778	0.27762	0.819293	0.81947	0.990195	0.950169	0.184117	0.764055	0.155567
2610507B11Rik	0.238235	0.33668	0.214831	0.182601	0.137729	0.128307	0.121549	0.922239	0.868017	0.600134	0.997582	0.953233	0.997331	0.901424	0.161139	0.300774	0.227998	0.23527	0.15688	0.179471	0.107787	0.574407	0.71828	0.411928	0.998622	0.70767	0.955487	0.576864	0.627293	0.268191	0.805219	0.999932	0.858964	1	0.406733	0.980477	0.530174	0.786998	0.995314	0.999441	0.215521	0.219284	0.165318	0.654808	0.990195	0.65561	0.663818	0.912379	0.983442
Cep89	0.0562468	0.289525	0.148381	0.191674	0.314388	0.0363211	0.0748398	0.922239	0.849884	0.534533	0.997582	0.953233	0.997331	0.901424	0.531515	0.00107822	0.000563271	0.736249	0.0359842	0.65751	0.00825662	0.792914	0.0273178	0.00513726	0.998622	0.526052	0.975567	0.274874	0.438208	0.401442	0.74814	0.999932	0.890429	1	0.128031	0.0253831	0.0678261	0.652814	0.226926	0.999441	0.0744217	0.0577484	0.0631157	0.493483	0.872353	0.537904	0.00954573	0.486037	0.172585
Cenpn	0.934916	0.915614	0.0661803	0.469094	0.773241	0.0604903	0.227413	0.995432	0.991833	0.38121	0.997582	0.982	0.997331	0.901424	0.467102	0.238587	0.97309	0.960051	0.841158	0.372245	0.0730405	0.757568	0.676025	0.986775	0.998895	0.972209	0.955487	0.516924	0.881093	0.209494	0.739259	0.999932	0.824379	1	0.447613	0.812383	0.208532	0.816099	0.957135	0.999441	0.804523	0.171309	0.209909	0.938066	0.990195	0.693514	0.00174662	0.308999	0.758654
Zmat5	0.48116	0.596449	0.170134	0.319336	0.628302	0.600392	0.166899	0.947805	0.934438	0.564262	0.997582	0.976856	0.997331	0.901424	0.0339852	0.740909	0.0266071	0.113232	0.775346	0.317872	0.052889	0.390539	0.923599	0.0968654	0.998622	0.9557	0.955487	0.466434	0.889613	0.998219	0.849698	0.999932	1	1	0.0490309	0.703787	0.814362	0.556386	0.909559	0.999441	0.281863	0.348091	0.0416203	0.691408	0.990195	0.485478	0.928435	0.970591	0.174603
Tmem101	0.723202	0.347632	0.650542	0.65878	0.590418	0.945262	0.612783	0.978202	0.872291	0.856096	0.997582	0.975595	0.997331	0.932594	0.390132	0.194762	0.440717	0.932874	0.898659	0.804362	0.318629	0.706325	0.619758	0.61274	0.998622	0.988132	0.985168	0.772651	0.869965	0.460229	0.977927	0.999932	0.923312	1	0.560445	0.160876	0.40191	0.847011	0.544971	0.999441	0.523718	0.5943	0.531583	0.795049	0.995606	0.846115	0.464482	0.795573	0.716711
Ttc27	0.0964778	0.937707	0.891993	0.503951	0.455302	0.859623	0.885947	0.922239	0.993072	0.96476	0.997582	0.961316	0.997331	0.984299	0.0382603	0.711315	0.0369039	0.748955	0.819104	0.564761	0.850591	0.40924	0.912663	0.121548	0.998622	0.966095	0.968564	0.966489	0.538118	0.8973	0.616135	0.999932	0.987566	1	0.255409	0.531326	0.939364	0.744347	0.816869	0.999441	0.0488315	0.887277	0.671386	0.451615	0.995606	0.907056	0.696984	0.912764	0.672257
Dzip1l	0.369334	0.29755	0.316367	0.358903	0.249785	0.403863	0.425405	0.922239	0.852734	0.674954	0.997582	0.953233	0.997331	0.901424	0.00154732	0.0112631	0.00210957	0.180461	0.103795	0.325733	0.82264	0.179566	0.144438	0.0145916	0.998622	0.656021	0.955487	0.956676	0.316897	0.315551	0.379632	0.999932	0.858964	1	0.0296058	0.043144	0.0987487	0.50421	0.302073	0.999441	0.0203353	0.0430849	0.505686	0.424822	0.771096	0.833438	0.341025	0.772425	0.341049
Prelid1	0.981478	0.485141	0.698525	0.285762	0.397139	0.770955	0.932887	0.998481	0.917198	0.883647	0.997582	0.953233	0.997331	0.990251	0.472521	0.552897	9.51672e-05	0.571072	0.843304	0.462387	0.519286	0.760858	0.84825	0.00128715	0.998622	0.973123	0.957632	0.854123	0.657838	0.537033	0.512968	0.999932	0.933345	1	0.683603	0.556985	0.866369	0.911272	0.830287	0.999441	0.526691	0.733149	0.457921	0.79537	0.995606	0.809671	0.75984	0.93879	0.519667
2610524H06Rik	0.757266	0.103644	0.0949601	0.784326	0.634786	0.910307	0.219162	0.981979	0.653425	0.444756	0.997582	0.977609	0.997331	0.901424	0.275678	0.0836535	0.0588045	0.119904	0.891713	0.441722	0.545111	0.64864	0.434444	0.167962	0.998622	0.987602	0.955487	0.867159	0.866314	0.300649	0.54474	0.999932	0.858964	1	0.291725	0.282667	0.2433	0.744347	0.673841	0.999441	0.503113	0.214976	0.254133	0.794754	0.990195	0.73561	0.122954	0.741388	0.547579
Mtrex	0.562894	0.617864	0.238928	0.426107	0.856922	0.427496	0.672095	0.947805	0.938997	0.614048	0.997582	0.992504	0.997331	0.942277	0.661814	0.211376	0.0876812	0.415808	0.873341	0.332593	0.742111	0.861551	0.643309	0.220734	0.998622	0.981782	0.955487	0.931862	0.621178	0.39558	0.775387	0.999932	0.883895	1	0.744283	0.147364	0.738303	0.941096	0.532655	0.999441	0.76559	0.811472	0.369066	0.925646	0.995606	0.785683	0.560875	0.864594	0.773764
Cmss1	0.223647	0.0655583	0.212116	0.441767	0.972345	0.291669	0.935687	0.922239	0.547776	0.597713	0.997582	0.999856	0.997331	0.990925	0.866661	0.291078	0.290059	0.375998	0.317022	0.0493212	0.897614	0.956288	0.71462	0.479828	0.998622	0.802582	0.812377	0.97798	0.306426	0.386842	0.409444	0.999932	0.879436	1	0.360757	0.324265	0.348265	0.759303	0.69625	0.999441	0.440058	0.114058	0.701392	0.774856	0.990195	0.909485	0.287006	0.772425	0.628938
Mvb12b	0.469676	0.178686	0.908724	0.306552	0.755351	0.145578	0.898806	0.94577	0.774159	0.970351	0.997582	0.980569	0.997331	0.985006	0.50503	0.719804	0.00907944	0.358893	0.773156	0.968844	0.71314	0.780727	0.915924	0.0439932	0.998622	0.955222	0.998526	0.926589	0.465747	0.0833872	0.554787	0.999932	0.65446	1	0.479863	0.886553	0.685012	0.828239	0.972858	0.999441	0.821667	0.841045	0.389817	0.944486	0.995606	0.795707	0.510195	0.829175	0.481759
Mon2	0.0254789	0.311649	0.843737	0.0517656	0.0443379	0.163835	0.233823	0.842792	0.85998	0.950159	0.997582	0.953233	0.997331	0.901424	0.166	0.374232	0.239543	0.361255	0.00208578	0.998284	0.0238195	0.580188	0.758704	0.42405	0.998622	0.257677	0.999701	0.366667	0.747786	0.0892809	0.522711	0.999932	0.663299	1	0.173111	0.736059	0.406405	0.678453	0.924229	0.999441	0.00790856	0.784228	0.0376123	0.337426	0.995606	0.478192	0.630622	0.907972	0.138126
Ccdc50	0.510099	0.0536375	0.0519564	0.723739	0.708265	0.684792	0.357746	0.947805	0.506507	0.343923	0.997582	0.977609	0.997331	0.901424	0.501681	0.118455	0.228956	0.56485	0.829016	0.975023	0.277927	0.779054	0.508434	0.412929	0.998622	0.969007	0.998638	0.75395	0.884438	0.0889891	0.364064	0.999932	0.663219	1	0.847235	0.279498	0.261601	0.976489	0.672168	0.999441	0.443812	0.338633	0.67718	0.777014	0.990195	0.907085	0.359252	0.772425	0.55124
Arl14ep	0.220303	0.147906	0.216537	0.780775	0.321364	0.262235	0.800381	0.922239	0.733292	0.601689	0.997582	0.953233	0.997331	0.966241	0.574973	0.712024	0.0330683	0.845988	0.125331	0.739067	0.672542	0.811319	0.9131	0.112705	0.998622	0.6881	0.981634	0.912894	0.73496	0.0344572	0.967263	0.999932	0.457018	1	0.472847	0.406409	0.793941	0.826149	0.744901	0.999441	0.214114	0.851331	0.750525	0.653822	0.995606	0.923269	0.478655	0.805811	0.747989
Tbc1d9b	0.414488	0.79486	0.78242	0.361874	0.454748	0.887489	0.457367	0.928767	0.979841	0.926077	0.997582	0.961316	0.997331	0.905427	0.0500526	0.403473	0.873484	0.451985	0.856568	0.340321	0.231348	0.443574	0.772432	0.9324	0.998622	0.977026	0.955487	0.70399	0.922954	0.751581	0.870729	0.999932	0.986435	1	0.0833657	0.152899	0.750482	0.617598	0.538412	0.999441	0.274248	0.92062	0.239456	0.688624	0.995606	0.728867	0.825088	0.947887	0.613641
Ppme1	0.182189	0.882852	0.789005	0.933431	0.655129	0.556626	0.2268	0.922239	0.991669	0.928678	0.997582	0.977609	0.997331	0.901424	0.0723739	0.663339	0.147378	0.115534	0.799508	0.978749	0.895702	0.478774	0.896792	0.312017	0.998622	0.961162	0.998721	0.977886	0.505311	0.628298	0.373696	0.999932	0.948284	1	0.170659	0.641702	0.134654	0.676015	0.873072	0.999441	0.227357	0.730938	0.419111	0.665693	0.995606	0.8044	0.462832	0.79456	0.260197
Lsm14a	0.401866	0.0151117	0.594228	0.0364193	0.449698	0.483171	0.217883	0.923029	0.263331	0.824988	0.997582	0.959847	0.997331	0.901424	0.463302	0.922318	0.516933	0.0207932	0.29229	0.0752995	0.1636	0.755428	0.994331	0.681072	0.998622	0.792669	0.883963	0.646422	0.970748	0.0328668	0.473736	0.999932	0.451308	1	0.725456	0.184611	0.399803	0.931425	0.5778	0.999441	0.222317	0.254275	0.0310432	0.660625	0.990195	0.460894	0.252604	0.772425	0.810762
Reep4	0.82773	0.377723	0.66481	0.738709	0.900126	0.522837	0.280064	0.98937	0.876116	0.863944	0.997582	0.998565	0.997331	0.901424	0.973773	0.0343646	0.454839	0.316285	0.746239	0.075685	0.597623	0.991648	0.277277	0.624994	0.998622	0.949011	0.883963	0.890419	0.742308	0.22401	0.562629	0.999932	0.844453	1	0.974397	0.00242036	0.635858	0.991926	0.0542762	0.999441	0.98884	0.91184	0.382329	0.994982	0.995606	0.790432	0.128773	0.741388	0.714992
Ppdpf	0.0437952	0.618538	0.194672	0.458342	0.117877	0.598847	0.579974	0.92073	0.938997	0.582255	0.997582	0.953233	0.997331	0.928578	0.0212226	0.881717	0.703465	0.484816	0.198604	0.414937	0.604793	0.337319	0.982822	0.823658	0.998622	0.739943	0.955487	0.892636	0.612927	0.926395	0.832903	0.999932	0.988291	1	0.312356	0.693183	0.791711	0.744572	0.904377	0.999441	0.0388278	0.495495	0.419499	0.435212	0.993316	0.8044	0.231516	0.772425	0.234124
Zfp655	0.204434	0.0851049	0.0279588	0.605875	0.0566572	0.891752	0.29155	0.922239	0.610075	0.254171	0.997582	0.953233	0.997331	0.901424	0.17078	0.135012	0.384081	0.694649	0.169338	0.824746	0.371218	0.580188	0.539359	0.560071	0.998622	0.717565	0.986598	0.792424	0.588133	0.226663	0.708893	0.999932	0.847899	1	0.97097	0.443919	0.804408	0.991373	0.770346	0.999441	0.050927	0.293684	0.321951	0.457204	0.990195	0.768072	0.38773	0.772425	0.814079
Wdr61	0.637694	0.554944	0.502736	0.492034	0.687732	0.270848	0.00923773	0.958171	0.929315	0.782663	0.997582	0.977609	0.997331	0.901424	0.675695	0.478102	0.170515	0.147314	0.629082	0.228798	0.026309	0.870669	0.816494	0.341176	0.998622	0.90737	0.955487	0.372843	0.481469	0.715165	0.114639	0.999932	0.97612	1	0.453244	0.633824	0.494843	0.820092	0.868411	0.999441	0.955222	0.309861	0.0495477	0.979706	0.990195	0.509494	0.827756	0.948618	0.239114
Ufsp1	0.254048	0.19261	0.413662	0.852131	0.515533	0.813639	0.212864	0.922239	0.788935	0.724022	0.997582	0.968789	0.997331	0.901424	0.423343	0.337332	0.0232336	0.588891	0.0355222	0.432693	0.0881311	0.728165	0.736457	0.087347	0.998622	0.524399	0.955487	0.54538	0.780173	0.371697	0.555465	0.999932	0.873912	1	0.255686	0.933978	0.414825	0.744347	0.981304	0.999441	0.0802624	0.335444	0.153756	0.507862	0.990195	0.642214	0.616333	0.900198	0.73313
Edrf1	0.851856	0.70355	0.0614634	0.0473493	0.369366	0.167981	0.0604768	0.992312	0.960826	0.371547	0.997582	0.953233	0.997331	0.901424	0.212088	0.0630122	0.00907171	0.0801918	0.625065	0.863521	0.0147466	0.605489	0.371084	0.0439784	0.998622	0.906137	0.992078	0.324632	0.393778	0.39993	0.836612	0.999932	0.889597	1	0.113178	0.114249	0.523949	0.637013	0.477804	0.999441	0.645125	0.282834	0.0267565	0.860356	0.990195	0.446544	0.0292795	0.661944	0.407288
Itfg2	0.626306	0.977323	0.786407	0.914348	0.15559	0.582316	0.546116	0.953551	0.996354	0.927854	0.997582	0.953233	0.997331	0.923474	0.81523	0.747711	0.00707666	0.355454	0.171501	0.563221	0.914351	0.93712	0.925741	0.0364098	0.998622	0.718632	0.968053	0.979139	0.215859	0.662838	0.748157	0.999932	0.959206	1	0.158771	0.621695	0.503122	0.667951	0.860935	0.999441	0.456598	0.735744	0.592516	0.785678	0.995606	0.874809	0.584181	0.882318	0.648089
Marchf5	0.738058	0.362951	0.711753	0.553197	0.522208	0.84471	0.36034	0.979216	0.873319	0.89064	0.997582	0.968789	0.997331	0.901424	0.223218	0.147231	0.999395	0.738737	0.813064	0.472731	0.202316	0.616299	0.561675	0.999523	0.998622	0.965083	0.957632	0.685144	0.808441	0.427838	0.847472	0.999932	0.902749	1	0.285292	0.08604	0.467286	0.744347	0.42282	0.999441	0.495128	0.666692	0.316346	0.794754	0.995606	0.765816	0.892712	0.957929	0.526837
Tppp3	0.740935	0.181888	0.622427	0.603453	0.80223	0.332656	0.462529	0.980059	0.777241	0.840514	0.997582	0.986063	0.997331	0.906468	0.189499	0.419559	2.67676e-05	0.653063	0.198954	0.0693168	0.92758	0.589247	0.784442	0.000456444	0.998622	0.74066	0.879323	0.981096	0.725213	0.738196	0.382581	0.999932	0.983055	1	0.0751645	0.334311	0.745654	0.608536	0.704365	0.999441	0.916139	0.121351	0.854067	0.963754	0.990195	0.962554	0.49611	0.81816	0.838665
Rtraf	0.930535	0.739375	0.408398	0.685146	0.168593	0.280405	0.182118	0.995432	0.970889	0.719832	0.997582	0.953233	0.997331	0.901424	0.511661	0.690755	0.406319	0.297873	0.206196	0.174202	0.291934	0.784425	0.90765	0.580014	0.998622	0.743633	0.955487	0.761193	0.430206	0.344426	0.57245	0.999932	0.86485	1	0.746032	0.157143	0.918367	0.942293	0.541347	0.999441	0.247355	0.566603	0.169634	0.678136	0.995606	0.66103	0.392222	0.772425	0.133751
2700062C07Rik	0.272066	0.215856	0.523843	0.816437	0.140252	0.958032	0.132686	0.922239	0.805198	0.793701	0.997582	0.953233	0.997331	0.901424	0.141255	0.0758769	0.180685	0.445994	0.395198	0.508414	0.0610403	0.551747	0.411393	0.354284	0.998622	0.830883	0.963412	0.488287	0.797843	0.422179	0.279116	0.999932	0.898508	1	0.777888	0.127863	0.115405	0.956176	0.505428	0.999441	0.0510521	0.41678	0.292062	0.457204	0.990195	0.75515	0.797183	0.942998	0.172915
Auts2	0.8082	0.781221	0.305652	0.164522	0.201487	0.868492	0.247602	0.987845	0.978525	0.666775	0.997582	0.953233	0.997331	0.901424	0.30261	0.736273	0.316227	0.732915	0.645013	0.691016	0.632847	0.665518	0.922304	0.503494	0.998622	0.912323	0.980287	0.901209	0.529979	0.744308	0.119022	0.999932	0.984381	1	0.703138	0.706007	0.600721	0.923237	0.909559	0.999441	0.211894	0.870981	0.909903	0.651279	0.995606	0.97679	0.697078	0.912764	0.342223
Hsdl1	0.379566	0.367208	0.198949	0.674806	0.14581	0.144019	0.26424	0.922239	0.873319	0.587166	0.997582	0.953233	0.997331	0.901424	0.0177402	0.0324084	0.981189	0.0690126	0.73038	0.835307	0.825724	0.329389	0.269592	0.9911	0.998622	0.946448	0.988474	0.95797	0.713406	0.708866	0.683103	0.999932	0.973111	1	0.125556	0.187666	0.180618	0.652383	0.581106	0.999441	0.0606959	0.0740154	0.208761	0.472424	0.912565	0.69336	0.846593	0.956846	0.713035
Dnajc18	0.599468	0.510702	0.931051	0.607276	0.740939	0.377592	0.918556	0.948449	0.922022	0.975444	0.997582	0.979323	0.997331	0.987385	0.936324	0.748246	0.921089	0.453892	0.843224	0.60179	0.910181	0.979409	0.925741	0.959348	0.998622	0.973123	0.968564	0.979139	0.559303	0.269392	0.758824	0.999932	0.858964	1	0.797423	0.5633	0.541527	0.96145	0.834737	0.999441	0.880744	0.853709	0.686841	0.957349	0.995606	0.907085	0.680692	0.912379	0.545231
Mob2	0.956222	0.747605	0.64132	0.205466	0.532771	0.774589	0.585347	0.996546	0.972711	0.851992	0.997582	0.969147	0.997331	0.928578	0.797014	0.888527	0.0117364	0.490373	0.707701	0.792246	0.27992	0.929934	0.984923	0.0531674	0.998622	0.936526	0.984659	0.75447	0.625309	0.60802	0.533245	0.999932	0.944001	1	0.995099	0.639442	0.807056	0.998286	0.871244	0.999441	0.726673	0.98406	0.262803	0.910983	0.997528	0.742088	0.968042	0.987065	0.313968
Utp11	0.49521	0.332694	0.362651	0.52449	0.62	0.638574	0.718861	0.947805	0.867029	0.697263	0.997582	0.976655	0.997331	0.951865	0.500471	0.182668	0.347495	0.658498	0.262854	0.471117	0.282497	0.778736	0.604606	0.529415	0.998622	0.772813	0.957632	0.755631	0.865403	0.360526	0.844092	0.999932	0.869667	1	0.79672	0.037016	0.516364	0.961308	0.27516	0.999441	0.358057	0.683481	0.414266	0.728362	0.995606	0.8028	0.552609	0.858148	0.535874
Mex3a	0.81335	0.19522	0.580645	0.975157	0.61624	0.31141	0.555211	0.987845	0.790636	0.818655	0.997582	0.976655	0.997331	0.925545	0.622237	0.00290189	0.058546	0.780068	0.287538	0.00956245	0.735361	0.836978	0.0581615	0.167444	0.998622	0.788782	0.462031	0.930461	0.596802	0.0656704	0.655362	0.999932	0.593767	1	0.316462	8.82053e-05	0.996744	0.745113	0.00487516	0.999441	0.901839	0.88354	0.698462	0.960587	0.995606	0.908723	0.292352	0.772425	0.54235
Cdk19	0.511415	5.38e-06	0.883704	0.82818	0.684325	0.129991	0.106989	0.947805	0.000463541	0.962826	0.997582	0.977609	0.997331	0.901424	0.620933	0.00149872	0.119064	0.601983	0.091451	0.444325	0.131194	0.836214	0.0345293	0.271784	0.998622	0.64159	0.955487	0.611623	0.717966	0.000118283	0.310225	0.999932	0.0123514	1	0.172707	0.0188728	0.449197	0.678453	0.190267	0.999441	0.603684	0.0190647	0.24149	0.834523	0.537968	0.728867	0.274323	0.772425	0.15497
Mier2	0.461834	0.234672	0.00529035	0.542521	0.736738	0.13992	0.939466	0.94577	0.813676	0.102959	0.997582	0.979323	0.997331	0.992237	0.255247	0.168886	0.334979	0.510671	0.831939	0.098007	0.90365	0.639215	0.585958	0.519005	0.998622	0.969951	0.899663	0.979013	0.712106	0.0609308	0.690579	0.999932	0.577815	1	0.294068	0.0129787	0.612713	0.744474	0.152843	0.999441	0.520888	0.790771	0.664843	0.795049	0.995606	0.906973	0.553098	0.858413	0.00806123
Zcrb1	0.549481	0.67948	0.358436	0.864217	0.129585	0.887381	0.466442	0.947805	0.951029	0.695608	0.997582	0.953233	0.997331	0.908066	0.813987	0.536072	0.166212	0.635667	0.0157629	0.870749	0.294608	0.936307	0.842104	0.335774	0.998622	0.426644	0.994128	0.761193	0.568885	0.771087	0.588559	0.999932	0.987566	1	0.0737476	0.647985	0.292477	0.608536	0.876165	0.999441	0.0883432	0.900398	0.617161	0.519326	0.995606	0.881605	0.987763	0.994793	0.666031
Ccdc77	0.522599	0.637197	0.905344	0.986068	0.465328	0.369516	0.372074	0.947805	0.94398	0.969716	0.997636	0.961316	0.997331	0.901424	0.798597	0.223518	0.00242093	0.465049	0.979274	0.346471	0.565208	0.930558	0.659056	0.0160794	0.998622	0.998173	0.955487	0.877325	0.43291	0.843149	0.609534	0.999932	0.987566	1	0.806555	0.912564	0.891986	0.964864	0.977119	0.999441	0.924009	0.181454	0.377483	0.966922	0.990195	0.788406	0.287378	0.772425	0.36316
Tmem209	0.61899	0.671328	0.860183	0.249541	0.211148	0.46046	0.000829286	0.952208	0.949632	0.953393	0.997582	0.953233	0.997331	0.901424	0.320786	0.708653	0.833535	0.00178495	0.895167	0.0785329	0.0209656	0.6724	0.912301	0.908011	0.998622	0.988132	0.887468	0.348962	0.25116	0.901783	0.121372	0.999932	0.987566	1	0.377134	0.0987779	0.320034	0.764191	0.449556	0.999441	0.581586	0.383819	0.00302235	0.821741	0.990195	0.372674	0.326722	0.772425	0.0781036
Selenoh	0.924212	0.163423	0.160973	0.626512	0.858292	0.122182	0.412025	0.995311	0.759837	0.550035	0.997582	0.992504	0.997331	0.901424	0.567329	0.981985	0.857414	0.911571	0.855447	0.744189	0.790776	0.807456	0.999044	0.922583	0.998622	0.976941	0.981634	0.948791	0.9043	0.0395763	0.332059	0.999932	0.480736	1	0.541575	0.762425	0.914311	0.844398	0.936469	0.999441	0.814179	0.859479	0.811049	0.941806	0.995606	0.947249	0.0256234	0.635291	0.757277
Ccdc12	0.673376	0.298334	0.97458	0.283866	0.935107	0.606988	0.471203	0.969356	0.852818	0.989315	0.997582	0.999856	0.997331	0.908066	0.618431	0.0944753	0.0809641	0.417981	0.500157	0.845584	0.413388	0.834836	0.459187	0.209486	0.998622	0.861541	0.989025	0.807197	0.735318	0.670466	0.759796	0.999932	0.960943	1	0.364212	0.18466	0.943657	0.759531	0.5778	0.999441	0.799486	0.307369	0.2469	0.936854	0.990195	0.731238	0.411017	0.772425	0.532808
2700097O09Rik	0.122997	0.826864	0.66919	0.973753	0.0503302	0.267252	0.699556	0.922239	0.985535	0.866683	0.997582	0.953233	0.997331	0.949716	0.0161156	0.413667	0.00317639	0.742335	0.593206	0.610973	0.522273	0.327356	0.780887	0.0199987	0.998622	0.900826	0.970126	0.854496	0.744278	0.372393	0.763937	0.999932	0.873912	1	0.15597	0.939245	0.501218	0.666466	0.982537	0.999441	0.0528197	0.476339	0.79989	0.457413	0.990195	0.940787	0.954461	0.979858	0.234649
Srrd	0.0849178	0.676144	0.539937	0.238985	0.404647	0.876412	0.187248	0.922239	0.95018	0.802486	0.997582	0.955323	0.997331	0.901424	0.777676	0.4885	0.0136108	0.939903	0.0638143	0.699649	0.796341	0.923815	0.821597	0.059277	0.998622	0.608905	0.981542	0.949709	0.519959	0.736623	0.112472	0.999932	0.983055	1	0.314206	0.539305	0.845377	0.744586	0.819985	0.999441	0.0625761	0.871578	0.860318	0.473588	0.995606	0.964716	0.193006	0.764055	NA
Coa8	0.322919	0.910289	0.248162	0.959089	0.380447	0.965362	0.793707	0.922239	0.991833	0.623888	0.997582	0.953233	0.997331	0.963686	0.155194	0.383111	0.0112114	0.817174	0.661243	0.540677	0.89336	0.56755	0.763732	0.0513585	0.998622	0.919077	0.965098	0.977886	0.890192	0.935176	0.860502	0.999932	0.988291	1	0.383329	0.254867	0.949888	0.768785	0.654737	0.999441	0.266719	0.99735	0.851606	0.684078	0.999265	0.960888	0.991572	0.996051	0.779856
Aif1l	0.163744	0.00684297	0.329083	0.943221	0.0662809	0.41888	0.520046	0.922239	0.160525	0.682586	0.997582	0.953233	0.997331	0.916141	0.00501157	0.572263	0.00046248	0.819879	0.342745	0.00121954	0.560603	0.239856	0.853879	0.00438237	0.998622	0.810148	0.150838	0.875188	0.893084	0.130651	0.729169	0.999932	0.735723	1	0.0707042	0.0505639	0.862212	0.60051	0.329485	0.999441	0.0350834	0.0148032	0.574073	0.432389	0.489757	0.867204	0.518249	0.835424	0.8256
Ptpmt1	0.661335	0.324074	0.938228	0.360019	0.433258	0.804302	0.96795	0.966353	0.864227	0.976888	0.997582	0.955323	0.997331	0.996594	0.421118	0.197019	0.150489	0.919459	0.490848	0.708704	0.339498	0.726332	0.623773	0.316112	0.998622	0.859053	0.981634	0.778654	0.85633	0.374568	0.533307	0.999932	0.874256	1	0.816593	0.191828	0.496767	0.96747	0.585961	0.999441	0.404643	0.588308	0.512103	0.751983	0.995606	0.836429	0.819386	0.945874	0.420291
2810004N23Rik	0.371094	0.7617	0.35101	0.748377	0.908928	0.513685	0.861518	0.922239	0.975608	0.693834	0.997582	0.999354	0.997331	0.981201	0.55299	0.675511	0.0178459	0.900249	0.527004	0.778694	0.92649	0.800694	0.901025	0.072058	0.998622	0.871956	0.983482	0.980459	0.507503	0.449629	0.684704	0.999932	0.91907	1	0.619683	0.345037	0.973129	0.878078	0.709608	0.999441	0.545873	0.817535	0.933023	0.799612	0.995606	0.984026	0.281827	0.772425	0.986127
Smim15	0.0639878	0.723367	0.000644147	0.0508292	0.184839	0.281675	0.884128	0.922239	0.966468	0.0293931	0.997582	0.953233	0.997331	0.983845	0.0155371	0.310946	0.306585	0.478502	0.929496	0.830509	0.308568	0.326003	0.725117	0.494831	0.998622	0.993261	0.987769	0.767329	0.703425	0.644368	0.24509	0.999932	0.954318	1	0.184229	0.657093	0.882259	0.692817	0.882569	0.999441	0.010696	0.24633	0.0806883	0.368494	0.990195	0.570141	0.120753	0.741388	0.417789
Fam53c	0.21022	0.176006	0.66929	0.828008	0.00560282	0.146296	0.830112	0.922239	0.771407	0.866693	0.997582	0.953233	0.997331	0.975869	0.0218734	0.153676	0.388921	0.573835	0.000360066	0.0165579	0.898354	0.339162	0.568274	0.564177	0.998622	0.213207	0.614298	0.97798	0.373187	0.909343	0.964526	0.999932	0.987566	1	0.336952	0.743255	0.399951	0.753353	0.928499	0.999441	0.00196019	0.0152428	0.663723	0.305832	0.494471	0.906973	0.169991	0.764055	0.0507664
Mtif3	0.598254	0.0998949	0.711094	0.421221	0.263752	0.409027	0.412869	0.948409	0.647714	0.890248	0.997582	0.953233	0.997331	0.901424	0.264082	0.0152077	0.422693	0.864829	0.442565	0.49826	0.977303	0.64296	0.173271	0.595492	0.998622	0.845062	0.959946	0.99525	0.656298	0.556341	0.270654	0.999932	0.933345	1	0.91176	0.107464	0.886295	0.983067	0.464462	0.999441	0.218828	0.100065	0.958766	0.657744	0.983486	0.988865	0.586631	0.883588	0.299106
Mplkip	0.791878	0.658868	0.566789	0.244066	0.957216	0.555813	0.727364	0.987567	0.946852	0.812819	0.997582	0.999856	0.997331	0.953079	0.319061	0.403298	0.49049	0.674496	0.437589	0.698492	0.596964	0.6724	0.772255	0.658846	0.998622	0.843854	0.98123	0.890361	0.865423	0.95377	0.358818	0.999932	0.991237	1	0.273133	0.672563	0.992747	0.744347	0.892172	0.999441	0.816405	0.342251	0.463982	0.942481	0.990195	0.811608	0.363177	0.772425	0.837122
2810021J22Rik	0.557623	0.515089	0.209805	0.324615	0.239896	0.165329	0.915657	0.947805	0.922022	0.596902	0.997582	0.953233	0.997331	0.987385	0.118133	0.933763	0.768597	0.733012	0.950416	0.442127	0.206254	0.533862	0.997927	0.867804	0.998622	0.995866	0.955487	0.68915	0.705511	0.117831	0.483434	0.999932	0.717894	1	0.273237	0.560454	0.265066	0.744347	0.832837	0.999441	0.274545	0.622342	0.498923	0.688739	0.995606	0.829906	0.406167	0.772425	0.540889
Tmem128	0.379229	0.619341	0.0390256	0.584094	0.932055	0.464924	0.491705	0.922239	0.938997	0.299706	0.997582	0.999856	0.997331	0.911678	0.703902	0.504365	0.293201	0.991076	0.487822	0.355193	0.214265	0.884927	0.829769	0.482544	0.999529	0.858392	0.955487	0.693076	0.598875	0.455509	0.949015	0.999932	0.921703	1	0.893307	0.31727	0.466677	0.980711	0.690864	0.999441	0.418604	0.804862	0.279839	0.76119	0.995606	0.746337	0.129211	0.741388	0.546754
Spats2l	0.24947	0.00130222	0.231656	0.720864	0.250829	0.308623	0.626769	0.922239	0.0458459	0.610818	0.997582	0.953233	0.997331	0.93465	0.177933	0.445308	0.108132	0.715777	0.426497	0.1172	0.67538	0.582089	0.801281	0.255237	0.998622	0.842627	0.921557	0.914228	0.822061	0.00186703	0.513352	0.999932	0.0859731	1	0.597483	0.560973	0.589235	0.86739	0.833074	0.999441	0.199091	0.14309	0.919431	0.638458	0.990195	0.980127	0.282956	0.772425	0.549687
Skida1	0.681151	0.277103	0.2966	0.335017	0.259046	0.516996	0.384919	0.971442	0.845698	0.662401	0.997582	0.953233	0.997331	0.901424	0.794369	0.977753	0.118362	0.912791	0.588358	0.781882	0.886791	0.928901	0.999044	0.270905	0.998622	0.899554	0.983492	0.975409	0.259339	0.23457	0.203665	0.999932	0.854254	1	0.860336	0.853921	0.845717	0.977124	0.965921	0.999441	0.562852	0.834857	0.994942	0.808524	0.995606	0.997597	0.368326	0.772425	0.244232
Hnrnpll	0.952535	0.131761	0.934175	0.734068	0.148003	0.93407	0.183994	0.995696	0.708463	0.975444	0.997582	0.953233	0.997331	0.901424	0.212214	0.39752	0.361942	0.547844	0.345688	0.343776	0.421387	0.605489	0.769372	0.541665	0.998622	0.810788	0.955487	0.809218	0.274907	0.241774	0.225934	0.999932	0.857137	1	0.0863578	0.529023	0.579126	0.619052	0.815805	0.999441	0.289892	0.406711	0.485783	0.691408	0.990195	0.822888	0.684946	0.912379	0.370142
Gins4	0.0239821	0.116351	4.02e-05	0.537615	0.425832	0.453493	0.728286	0.837766	0.682353	0.00497338	0.997582	0.955323	0.997331	0.953079	0.0381313	0.0358868	0.000189645	0.541309	0.331899	0.330946	0.784704	0.408704	0.283093	0.00217398	0.998622	0.809244	0.955487	0.946761	0.324114	0.0681552	0.361378	0.999932	0.599179	1	0.231623	0.0271627	0.488553	0.732236	0.234901	0.999441	0.0840754	0.481898	0.86889	0.514305	0.992988	0.964795	0.10787	0.741388	0.00631778
Armc10	0.485964	0.956649	0.558816	0.452959	0.859472	0.110491	0.0427705	0.947805	0.993257	0.809742	0.997582	0.992504	0.997331	0.901424	0.620809	0.247076	0.0472443	0.13943	0.649022	0.446881	0.0821873	0.836214	0.681631	0.144234	0.998622	0.913757	0.955487	0.534414	0.718785	0.324005	0.415831	0.999932	0.861162	1	0.988415	0.705676	0.919103	0.997048	0.909559	0.999441	0.50918	0.191692	0.0398165	0.794754	0.990195	0.485478	0.0732985	0.741388	0.197783
Lime1	0.650562	0.256891	0.230602	0.563825	0.568029	0.139024	0.752485	0.961872	0.828537	0.610181	0.997582	0.972625	0.997331	0.957671	0.256543	0.903945	0.192723	0.708083	0.389003	0.389593	0.522644	0.639671	0.989529	0.369262	0.998622	0.828788	0.955487	0.854558	0.46803	0.097837	0.858491	0.999932	0.682824	1	0.113738	0.343584	0.880555	0.63706	0.709053	0.999441	0.866511	0.709564	0.521825	0.955827	0.995606	0.841585	0.0254944	0.635291	0.977475
Proser1	0.762841	0.615633	0.00404478	0.838648	0.986943	0.0432028	0.872521	0.984016	0.93807	0.0907421	0.997582	0.999856	0.997331	0.982576	0.427128	0.969215	0.113949	0.95966	0.67352	0.0839926	0.727313	0.731412	0.999044	0.264149	0.998895	0.925093	0.891221	0.927636	0.827034	0.0422675	0.942161	0.999932	0.4953	1	0.271053	0.109272	0.788739	0.744347	0.468181	0.999441	0.843396	0.327178	0.816949	0.948777	0.990195	0.949361	0.0614931	0.741388	0.361355
Wdr86	0.894325	0.386179	0.0465222	0.318236	0.894282	0.375494	0.40566	0.993268	0.879182	0.327559	0.997582	0.998041	0.997331	0.901424	0.790631	0.000630836	0.187944	0.855225	0.0819558	0.0370093	0.0917767	0.928295	0.0180788	0.36247	0.998622	0.628886	0.792398	0.555831	0.920619	0.364632	0.351991	0.999932	0.873844	1	0.266569	0.000303352	0.260054	0.744347	0.0133625	0.999441	0.461385	0.271589	0.221779	0.788765	0.990195	0.706687	0.347656	0.772425	0.342539
Zcchc17	0.488815	0.131181	0.390915	0.728911	0.0490773	0.58645	0.136328	0.947805	0.708463	0.708777	0.997582	0.953233	0.997331	0.901424	0.0963631	0.179105	0.0736685	0.192802	0.0862983	0.157045	0.22521	0.514009	0.59914	0.19634	0.998622	0.632924	0.946526	0.700274	0.281057	0.453654	0.370365	0.999932	0.921703	1	0.23609	0.0454984	0.610307	0.735912	0.311591	0.999441	0.094151	0.249846	0.255375	0.524388	0.990195	0.737015	0.44868	0.785358	0.186926
Khdc4	0.696071	0.157498	0.103995	0.728418	0.676671	0.0859812	0.269384	0.972514	0.749104	0.461328	0.997582	0.977609	0.997331	0.901424	0.576809	0.365512	0.835321	0.442058	0.672307	0.188891	0.383798	0.811849	0.755955	0.909297	0.998622	0.924242	0.955487	0.796728	0.940056	0.0195421	0.560534	0.999932	0.337605	1	0.740515	0.0318941	0.973332	0.938731	0.255022	0.999441	0.656615	0.796391	0.366004	0.866606	0.995606	0.785152	0.0120182	0.489102	0.608681
Nsun4	0.514189	0.395179	0.519278	0.791876	0.323989	0.392833	0.991877	0.947805	0.883019	0.791719	0.997582	0.953233	0.997331	0.99826	0.808855	0.466207	0.000869502	0.813664	0.894714	0.642605	0.903835	0.934403	0.810205	0.00725872	0.998622	0.988132	0.972637	0.979033	0.365713	0.312605	0.870068	0.999932	0.858964	1	0.969801	0.520702	0.940954	0.991373	0.812383	0.999441	0.729805	0.999393	0.800898	0.911384	0.999758	0.941714	0.653619	0.912379	0.684114
Chmp1b	0.238774	0.435529	0.19741	0.72079	0.812175	0.44864	0.348548	0.922239	0.901452	0.584867	0.997582	0.987287	0.997331	0.901424	0.0880213	0.606777	0.00129552	0.630866	0.000538988	0.863973	0.38745	0.502675	0.870848	0.0100312	0.998622	0.213207	0.992269	0.797197	0.557647	0.385274	0.479028	0.999932	0.87909	1	0.00108576	0.824343	0.65961	0.241592	0.958962	0.999441	0.125959	0.980944	0.451931	0.564564	0.997528	0.808759	0.573725	0.874267	0.46429
Fam98a	0.628367	0.549059	0.0873498	0.815907	0.711058	0.724656	0.411699	0.95435	0.929315	0.427254	0.997582	0.977609	0.997331	0.901424	0.900528	0.814636	0.0141033	0.721483	0.519299	0.808468	0.448285	0.96775	0.953095	0.0608022	0.998622	0.869352	0.985168	0.823659	0.89768	0.480869	0.691181	0.999932	0.927207	1	0.707564	0.858251	0.764063	0.924656	0.96727	0.999441	0.578604	0.867567	0.466664	0.81947	0.995606	0.812745	0.598921	0.889807	0.384863
Prxl2b	0.624348	0.612177	0.416242	0.445729	0.525978	0.687837	0.176033	0.953204	0.937056	0.725509	0.997582	0.968789	0.997331	0.901424	0.448026	0.164612	0.000218467	0.487882	0.273452	0.292286	0.0478569	0.744993	0.582151	0.00243028	0.998622	0.780107	0.955487	0.449725	0.526407	0.583253	0.829188	0.999932	0.935463	1	0.296606	0.112353	0.442377	0.744474	0.475108	0.999441	0.878513	0.946089	0.0527669	0.957349	0.996237	0.520796	0.348264	0.772425	0.532207
Zfp688	0.684574	0.342525	0.441086	0.514812	0.963129	0.833806	0.972084	0.971533	0.87114	0.743578	0.997582	0.999856	0.997331	0.99669	0.991623	0.251319	0.431446	0.695985	0.722054	0.79024	0.728146	0.997563	0.683961	0.60432	0.998622	0.943105	0.984659	0.928078	0.800136	0.635223	0.696187	0.999932	0.951155	1	0.767564	0.582399	0.952113	0.951957	0.840458	0.999441	0.723363	0.323218	0.563275	0.909695	0.990195	0.860778	0.546755	0.853599	0.803893
Txndc11	0.52717	0.236427	0.805733	0.947584	0.316574	0.815122	0.500905	0.947805	0.815999	0.9352	0.997582	0.953233	0.997331	0.913567	0.0738648	0.736143	0.376034	0.67966	0.923129	0.521778	0.792082	0.478774	0.922304	0.553251	0.998622	0.990848	0.964338	0.948847	0.835046	0.222789	0.554171	0.999932	0.842495	1	0.0815793	0.828946	0.874998	0.615569	0.960187	0.999441	0.343353	0.55464	0.700977	0.725793	0.995606	0.909485	0.187955	0.764055	0.7287
Trp53rka	0.036067	0.948018	0.347337	0.716594	0.62721	0.112601	0.784157	0.887514	0.993072	0.69056	0.997582	0.976713	0.997331	0.962985	0.940639	0.103639	0.403131	0.924814	0.0424566	0.260718	0.543993	0.981461	0.479193	0.577217	0.998622	0.563122	0.955487	0.866123	0.126305	0.395023	0.960256	0.999932	0.883491	1	0.12592	0.830384	0.80728	0.652383	0.960518	0.999441	0.12856	0.097594	0.552504	0.566378	0.980996	0.856815	0.329356	0.772425	0.123959
Ola1	0.186302	0.732815	0.627802	0.743763	0.221588	0.884347	0.544345	0.922239	0.969395	0.843289	0.997582	0.953233	0.997331	0.923149	0.542089	0.172848	0.51992	0.96102	0.0164288	0.643171	0.293195	0.796094	0.589876	0.683065	0.998895	0.430262	0.972637	0.761193	0.912835	0.932244	0.874899	0.999932	0.988291	1	0.0854388	0.173594	0.421318	0.619052	0.564463	0.999441	0.0726411	0.763908	0.48408	0.491333	0.995606	0.822218	0.968694	0.987316	0.383404
Cyb5rl	0.0322201	0.0208831	0.784258	0.0368808	0.360754	0.439594	0.293065	0.862875	0.31764	0.926882	0.997582	0.953233	0.997331	0.901424	0.607607	0.239625	0.0962155	0.666759	0.0175045	0.282978	0.139836	0.828828	0.677234	0.235896	0.998622	0.432293	0.955487	0.624447	0.288962	0.170672	0.307664	0.999932	0.795226	1	0.0788452	0.983168	0.614194	0.611505	0.995633	0.999441	0.0686707	0.0791673	0.0727802	0.484699	0.926346	0.55886	0.723472	0.921006	0.00683906
Dpy30	0.889879	0.541793	0.653711	0.614853	0.351024	0.864927	0.216947	0.993268	0.929289	0.858104	0.997582	0.953233	0.997331	0.901424	0.703707	0.73927	0.642456	0.443415	0.462323	0.930531	0.358931	0.884927	0.923548	0.77721	0.998622	0.847924	0.996665	0.787915	0.553948	0.48444	0.58304	0.999932	0.927229	1	0.853741	0.797603	0.975509	0.977124	0.950248	0.999441	0.522744	0.777971	0.283751	0.795049	0.995606	0.75017	0.945295	0.976666	0.337489
Arl5a	0.204118	0.258615	0.470791	0.283648	0.673694	0.371613	0.422482	0.922239	0.830368	0.764741	0.997582	0.977609	0.997331	0.901424	0.322685	0.817476	0.516851	0.788241	0.134535	0.99883	0.782592	0.672673	0.953906	0.681072	0.998622	0.695259	0.999701	0.94535	0.347288	0.294226	0.329721	0.999932	0.858964	1	0.762107	0.7229	0.924009	0.949577	0.916773	0.999441	0.13055	0.786868	0.679254	0.569641	0.995606	0.907085	0.912278	0.964499	0.532608
Senp7	0.423593	0.743658	0.0566361	0.769782	0.392549	0.19985	0.220831	0.930596	0.971497	0.356584	0.997582	0.953233	0.997331	0.901424	0.654863	0.134535	0.463774	0.995249	0.214138	0.608713	0.112221	0.857938	0.538885	0.633185	0.999946	0.749684	0.969157	0.579958	0.991394	0.548702	0.582868	0.999932	0.933345	1	0.550518	0.56986	0.339827	0.846464	0.837776	0.999441	0.158256	0.177624	0.189563	0.598445	0.990195	0.678062	0.024173	0.625962	0.603347
Pclaf	0.756603	0.775298	0.0224208	0.633934	0.930619	0.201303	0.24342	0.981979	0.978525	0.224766	0.997582	0.999856	0.997331	0.901424	0.495835	0.241678	0.794565	0.301948	0.513741	0.0051524	0.914625	0.775313	0.679359	0.884469	0.998622	0.865992	0.330216	0.979139	0.781801	0.525235	0.283574	0.999932	0.932406	1	0.381071	0.00409857	0.355542	0.767698	0.0757589	0.999441	0.891432	0.242223	0.57554	0.958009	0.990195	0.867885	0.00971252	0.486037	0.998765
Flywch2	0.319831	0.136332	0.367314	0.395458	0.492391	0.342623	0.323023	0.922239	0.717474	0.699598	0.997582	0.965358	0.997331	0.901424	0.0184337	0.00090336	0.000154113	0.379747	0.415083	0.00286857	0.0736105	0.329646	0.0237859	0.00185726	0.998622	0.838319	0.251612	0.518024	0.364975	0.221259	0.344352	0.999932	0.839866	1	0.0546495	0.63665	0.484457	0.578943	0.869289	0.999441	0.133045	0.0017975	0.120301	0.572229	0.137311	0.621502	0.404584	0.772425	0.0980055
Ptcd3	0.295213	0.413916	0.32996	0.35561	0.309511	0.431692	0.341322	0.922239	0.891161	0.682586	0.997582	0.953233	0.997331	0.901424	0.284378	0.389547	0.322889	0.37205	0.365762	0.399657	0.30369	0.654581	0.766407	0.508999	0.998622	0.820955	0.955487	0.763692	0.697258	0.75715	0.6632	0.999932	0.986918	1	0.447025	0.394127	0.255355	0.81565	0.737769	0.999441	0.315379	0.469623	0.374811	0.711567	0.990195	0.786802	0.324114	0.772425	0.756867
Mettl18	0.496422	0.467173	0.608571	0.721528	0.10414	0.643584	0.514357	0.947805	0.9143	0.832324	0.997582	0.953233	0.997331	0.916009	0.637749	0.564216	0.559257	0.544309	0.46464	0.100669	0.683718	0.848286	0.851772	0.71359	0.998622	0.848501	0.902728	0.916743	0.150454	0.902699	0.875693	0.999932	0.987566	1	0.94494	0.152332	0.865814	0.986841	0.538403	0.999441	0.381895	0.383027	0.405226	0.735155	0.990195	0.798814	0.0138122	0.526095	0.344896
Mfsd8	0.0488131	0.0667787	0.00391376	0.433127	0.0802754	0.721362	0.771848	0.922239	0.553479	0.0892945	0.997582	0.953233	0.997331	0.960183	0.0146256	0.039975	0.0754422	0.990975	0.719789	0.419239	0.423586	0.321349	0.298246	0.199819	0.999529	0.941968	0.955487	0.810132	0.75304	0.0169691	0.494571	0.999932	0.318518	1	0.139914	0.0511782	0.582221	0.657456	0.329664	0.999441	0.0542504	0.485213	0.571495	0.461844	0.992988	0.865211	0.35786	0.772425	0.45876
Rnf113a1	0.829471	0.825834	0.68369	0.387448	0.520942	0.469362	0.662288	0.989471	0.985535	0.874736	0.997582	0.968789	0.997331	0.940077	0.847902	0.993889	0.853958	0.6369	0.493646	0.351291	0.358533	0.949446	0.999044	0.920616	0.998622	0.85953	0.955487	0.787622	0.788618	0.767115	0.757285	0.999932	0.987566	1	0.729332	0.574513	0.744466	0.932734	0.838513	0.999441	0.523607	0.45606	0.35168	0.795049	0.990195	0.783128	0.196818	0.764055	0.99758
Rex1bd	0.195114	0.385845	0.642937	0.39616	0.566505	0.237654	0.432093	0.922239	0.879182	0.852357	0.997582	0.972625	0.997331	0.901424	0.687247	0.457161	0.445826	0.93796	0.240141	0.383103	0.167146	0.878064	0.807845	0.617651	0.998622	0.761681	0.955487	0.649514	0.524646	0.101087	0.900263	0.999932	0.688916	1	0.555755	0.308594	0.338638	0.846464	0.686539	0.999441	0.265802	0.803082	0.330821	0.683919	0.995606	0.773488	0.551937	0.857896	0.772969
Rrp15	0.228715	0.488014	0.394385	0.799505	0.204881	0.14925	0.184522	0.922239	0.917324	0.710471	0.997582	0.953233	0.997331	0.901424	0.435133	0.335193	0.0256244	0.265796	0.00215319	0.976906	0.216435	0.737247	0.735656	0.0943108	0.998622	0.257677	0.998638	0.693076	0.982154	0.223349	0.545125	0.999932	0.843325	1	0.0527816	0.168397	0.850055	0.570722	0.55699	0.999441	0.0384055	0.418829	0.153534	0.435212	0.990195	0.642139	0.306943	0.772425	0.222155
Rpp25l	0.392818	0.826213	0.034802	0.432708	0.901091	0.828444	0.508817	0.923029	0.985535	0.284468	0.997582	0.998565	0.997331	0.913951	0.825901	0.988833	0.287901	0.62882	0.335502	0.872561	0.161291	0.940979	0.999044	0.47744	0.998622	0.809244	0.994128	0.643877	0.611167	0.774776	0.903969	0.999932	0.987566	1	0.49671	0.765716	0.384898	0.834652	0.938125	0.999441	0.485093	0.998983	0.294361	0.794754	0.999758	0.75516	0.164266	0.764055	0.361032
Cox19	0.96114	0.165855	0.0263807	0.196493	0.797178	0.0831801	0.413712	0.996603	0.760137	0.246745	0.997582	0.986063	0.997331	0.901424	0.592523	0.189367	0.00826474	0.0970471	0.889733	0.134418	0.600878	0.820887	0.613467	0.0410183	0.998622	0.987546	0.946526	0.891551	0.891755	0.0491385	0.720081	0.999932	0.525218	1	0.537373	0.0891506	0.418141	0.841709	0.428689	0.999441	0.937202	0.705927	0.127796	0.971253	0.995606	0.634404	0.864215	0.956884	0.0545407
Ttc39c	0.654106	0.235649	0.158874	0.457793	0.332919	0.627196	0.856917	0.963403	0.814825	0.547513	0.997582	0.953233	0.997331	0.980869	0.270116	0.250657	0.336618	0.461934	0.406151	0.432969	0.345963	0.646466	0.683961	0.520515	0.998622	0.833136	0.955487	0.779863	0.43196	0.383534	0.603532	0.999932	0.878706	1	0.131716	0.0272068	0.530974	0.653622	0.234901	0.999441	0.34121	0.370791	0.411065	0.724817	0.990195	0.802001	0.399879	0.772425	0.642386
[truncated: 8,507 more rows]
[truncated: 13 more columns]

## Sheet: p-value
GENE_ID	3WA_T_chr.p	3WA_T_sry.p	3WA_T_treatment.p	3WA_T_`chr:sry`.p	3WA_T_`chr:treatment`	3WA_T_`sry:treatment`.p	3WA_T_`chr:sry:treatment`.p	3WA_E_chr.p	3WA_E_sry.p	3WA_E_treatment.p	3WA_E_`chr:sry`.p	3WA_E_`chr:treatment`.p	3WA_E_`sry:treatment`.p	3WA_E_`chr:sry:treatment`,p	2WA_T_chr.p	2WA_T_sry.p	2WA_T_chr.sry.p	2WA_E_chr.p	2WA_E_sry.p	2WA_E_chr.sry.p	2WA_B_chr.p	2WA_B_sry.p	2WA_B_chr.sry.p	1WA_T_XYM_p	1WA_T_XYF_p	1WA_T_XXM_p	1WA_T_XXF_p	1WA_E_XYM_p	1WA_E_XYF_p	1WA_E_XXM_p	1WA_E_XXF_p
[truncated: 9,400 more rows]

[truncated: 1 more sheets: FDR]
