# Supplementary material for: Relative contributions of sex hormones, sex chromosomes, and gonads to sex differences in tissue gene regulation
Source: Genome Res. 2022 May;32(5):807–24. doi: 10.1101/gr.275965.121 (PMC9104702; doi:10.1101/gr.275965.121)
Supplement: Supplemental Material [file supp_gr.275965.121_Supplemental_Table_S4.xlsx]

## Sheet: Description
Supplemental Table S4: Overlap Analysis between Liver GTEx sex-biased genes with FCG DEGs through each ANOVA
Information on the given tabs are found below
Master	Summary of all DEGs either p-value or FDR found in the FCG, red highlighted cells highlight genes that are significant (p or FDR <0.05) in both humans and mice
p-value	Summary of all DEGs found in the FCG, red highlighted cells highlight genes that are significant (p <0.05) in both humans and mice
FDR	Summary of all DEGs found in the FCG, red highlighted cells highlight genes that are significant (FDR <0.05) in both humans and mice

## Sheet: Master
GENE_ID	Human_GENE_ID	GTEx_direction	GTEx_LFSR	3WA_T_chr_p	3WA_T_sry_p	3WA_T_treatment_p	3WA_T_chr:sry_p	3WA_T_chr:treatment_p	3WA_T_sry:treatment_p	3WA_T_chr:sry:treatment_p	3WA_T_chr_FDR	3WA_T_sry_FDR	3WA_T_treatment_FDR	3WA_T_chr.sry_FDR	3WA_T_chr.treatment_FDR	3WA_T_sry.treatment_FDR	3WA_T_chr.sry.treatment_FDR	3WA_E_chr_p	3WA_E_sry_p	3WA_E_treatment_p	3WA_E_chr:sry_p	3WA_E_chr:treatment_p	3WA_E_sry:treatment_p	3WA_E_chr:sry:treatment_p	3WA_E_chr_FDR	3WA_E_sry_FDR	3WA_E_treatment_FDR	3WA_E_chr.sry_FDR	3WA_E_chr.treatment_FDR	3WA_E_sry.treatment_FDR	3WA_E_chr.sry.treatment_FDR	2WA_T_chr.p	2WA_T_sry.p	2WA_T_chr.sry.p	2WA_T_chr.FDR	2WA_T_sry.FDR	2WA_T_chr.sry.FDR	2WA_E_chr.p	2WA_E_sry.p	2WA_E_chr.sry.p	2WA_E_chr.FDR	2WA_E_sry.FDR	2WA_E_chr.sry.FDR	2WA_B_chr.p	2WA_B_sry.p	2WA_B_chr.sry.p	2WA_B_chr.FDR	2WA_B_sry.FDR	2WA_B_chr.sry.FDR
Xist	XIST	Female-biased	0	3.81871e-17	0.0826993	0.397437	0.086389	0.356784	0.401447	0.353068	9.5035e-14	0.70127	0.600296	0.999936	0.999956	0.911033	0.996566	6.5354e-24	0.142911	0.98953	0.19851	0.988736	0.997584	0.996791	2.43967e-20	0.610744	0.999954	0.946978	0.999939	0.999994	0.999915	2.0239e-07	0.159958	0.149856	0.000503276	0.947682	0.999951	1.36e-12	0.303459	0.368836	5.08e-09	0.805638	0.950269	1.34523e-12	0.304505	0.365101	5.01971e-09	0.817341	0.932819
Zfx	ZFX	Female-biased	6.8666e-100	0.595773	0.990903	0.00388885	0.643603	0.998563	0.62267	0.481596	0.999925	0.999976	0.0263229	0.999936	0.999956	0.969583	0.996566	0.86904	0.915342	0.715049	0.546835	0.499866	0.719673	0.599168	0.999996	0.999842	0.879064	0.963213	0.999939	0.971638	0.967346	0.676593	0.693201	0.848945	0.999967	0.962065	0.999951	0.53125	0.84997	0.953762	0.999963	0.985078	0.999961	0.734726	0.758017	0.457525	0.999996	0.954138	0.956445
Rps4x	RPS4X	Female-biased	4.29467e-67	0.959925	0.390229	0.00966416	0.445499	0.591251	0.877956	0.991055	0.999925	0.874724	0.0516113	0.999936	0.999956	0.999914	0.999982	0.188655	0.417194	0.443865	0.309817	0.406326	0.130359	0.0763452	0.999996	0.801743	0.721981	0.946978	0.999939	0.938581	0.949273	0.683061	0.482407	0.600911	0.999967	0.961605	0.999951	0.137697	0.108785	0.057318	0.999963	0.753337	0.950269	0.73029	0.616415	0.583852	0.999996	0.92531	0.960815
Ddx3x	DDX3X	Female-biased	3.87158e-49	6.82025e-05	0.000462295	0.481453	0.704257	0.758268	0.0590899	0.141991	0.0565777	0.0406058	0.676426	0.999936	0.999956	0.800958	0.996566	0.00153626	0.223442	0.497377	0.975414	0.537534	0.702959	0.116954	0.495265	0.696252	0.759938	0.999974	0.999939	0.971638	0.949273	0.00983615	0.000981432	0.451898	0.999967	0.303846	0.999951	0.102152	0.608143	0.331008	0.999963	0.903977	0.950269	0.00260042	0.175561	0.187427	0.846131	0.740575	0.932819
Smc1a	SMC1A	Female-biased	1.07409e-38	0.93336	0.497302	0.652128	0.979204	0.00779664	0.936406	0.59635	0.999925	0.922549	0.803298	0.999936	0.999956	0.999914	0.996566	0.410758	0.465793	0.040081	0.372059	0.00584767	0.962775	0.127577	0.999996	0.832511	0.239396	0.946978	0.999939	0.999994	0.949273	0.0681056	0.593479	0.695459	0.999967	0.961605	0.999951	0.0156634	0.391208	0.00620487	0.999963	0.807921	0.609547	0.0562322	0.675225	0.724889	0.999996	0.92531	0.968638
Corin	LRP4	Female-biased	1.73958e-13	0.216217	0.921328	0.132706	0.945797	0.684653	0.490179	0.611513	0.999925	0.999976	0.320537	0.999936	0.999956	0.9475	0.996566	0.247317	0.259235	0.215232	0.2505	0.349641	0.306497	0.275524	0.999996	0.736967	0.533685	0.946978	0.999939	0.938581	0.949273	0.442188	0.587399	0.597994	0.999967	0.961605	0.999951	0.300078	0.287075	0.268026	0.999963	0.805638	0.950269	0.335376	0.641919	0.795075	0.999996	0.92531	0.993709
Enpp2	ENPP2	Female-biased	5.77234e-11	0.300373	0.0893479	0.00492626	0.561477	0.609865	0.0147703	0.227585	0.999925	0.71651	0.0312485	0.999936	0.999956	0.574351	0.996566	0.0376839	0.0805582	0.957481	0.0265793	0.41008	0.0696014	0.441357	0.999996	0.497129	0.999954	0.946978	0.999939	0.938581	0.958875	0.580216	0.398738	0.508692	0.999967	0.947682	0.999951	0.0379548	0.956921	0.0326545	0.999963	0.999992	0.844412	0.38591	0.0255885	0.316978	0.999996	0.364464	0.932819
Pfn2	PFN2	Female-biased	7.87652e-07	0.0733498	0.81088	0.777094	0.0246796	0.0239274	0.791012	0.785788	0.999925	0.975669	0.875874	0.999936	0.999956	0.977926	0.996762	0.266636	0.809121	0.513858	0.501089	0.498846	0.501046	0.123712	0.999996	0.946553	0.766851	0.963213	0.999939	0.953346	0.949273	0.00252753	0.982744	0.0967952	0.999967	0.999993	0.999951	0.225928	0.530354	0.540783	0.999963	0.883647	0.960042	0.751703	0.756801	0.122545	0.999996	0.953733	0.932819
Fundc1	FUNDC1	Female-biased	6.00423e-06	0.274432	0.383925	0.149478	0.287732	0.381796	0.395952	0.355003	0.999925	0.871483	0.345646	0.999936	0.999956	0.907207	0.996566	0.155386	0.262762	0.376084	0.416067	0.906714	0.321435	0.104571	0.999996	0.737958	0.66013	0.963213	0.999939	0.938581	0.949273	0.330573	0.394432	0.325706	0.999967	0.947682	0.999951	0.366001	0.222325	0.159562	0.999963	0.787691	0.950269	0.228653	0.902565	0.439599	0.999996	0.999976	0.947929
Aprt	APRT	Female-biased	0.000326205	0.140156	0.647842	0.37474	0.37298	0.917544	0.467993	0.271777	0.999925	0.955321	0.581545	0.999936	0.999956	0.942846	0.996566	0.384213	0.0465437	0.74492	0.120033	0.347683	0.480628	0.185351	0.999996	0.412703	0.892988	0.946978	0.999939	0.953346	0.949273	0.387014	0.865117	0.219948	0.999967	0.999993	0.999951	0.96141	0.0713571	0.0574538	0.999963	0.707439	0.950269	0.204124	0.34221	0.862677	0.999996	0.817341	0.999996
Gjb1	GJB1	Female-biased	0.000357506	0.290328	0.231118	0.27263	0.351608	0.332762	0.307427	0.332573	0.999925	0.859591	0.492488	0.999936	0.999956	0.907207	0.996566	0.477002	0.373717	0.306075	0.319351	0.424151	0.287247	0.301863	0.999996	0.771072	0.616278	0.946978	0.999939	0.938581	0.949273	0.316565	0.273523	0.347049	0.999967	0.947682	0.999951	0.453758	0.333881	0.316127	0.999963	0.805638	0.950269	0.631598	0.342691	0.839719	0.999996	0.817341	0.999996
Syap1	SYAP1	Female-biased	0.000417927	0.429159	0.787973	0.00600788	0.651211	0.411612	0.0862082	0.502275	0.999925	0.9648	0.0362317	0.999936	0.999956	0.839503	0.996566	0.455865	0.264414	0.0757098	0.189231	0.371363	0.699455	0.853268	0.999996	0.739318	0.327112	0.946978	0.999939	0.971638	0.999915	0.979327	0.103776	0.853407	0.999967	0.947682	0.999951	0.896048	0.523267	0.200279	0.999963	0.881328	0.950269	0.326287	0.366303	0.49159	0.999996	0.817341	0.960815
Ssbp1	SSBP1	Female-biased	0.000467989	0.0645408	0.631965	0.012653	0.953834	0.5757	0.787982	0.80727	0.999925	0.949405	0.0627273	0.999936	0.999956	0.976452	0.999982	0.308897	0.358469	0.496635	0.389651	0.467381	0.345612	0.377638	0.999996	0.767956	0.75981	0.949419	0.999939	0.938581	0.949472	0.30789	0.563884	0.815204	0.999967	0.961605	0.999951	0.387407	0.356962	0.388119	0.999963	0.805638	0.950269	0.125974	0.891747	0.904302	0.999996	0.999976	0.999996
Gcgr	GCGR	Female-biased	0.000536875	0.615321	0.33081	0.0370982	0.51686	0.35949	0.851151	0.404015	0.999925	0.861222	0.136374	0.999936	0.999956	0.999914	0.996566	0.0886018	0.148596	0.591483	0.910499	0.922719	0.903446	0.074208	0.999996	0.621419	0.802912	0.999974	0.999939	0.999994	0.949273	0.757315	0.560602	0.889156	0.999967	0.961605	0.999951	0.0927716	0.141861	0.0771731	0.999963	0.775838	0.950269	0.346551	0.43877	0.326117	0.999996	0.843519	0.932819
Fign	FIGN	Female-biased	0.00077896	0.478683	0.0542459	5.90306e-06	0.231357	0.901883	0.122347	0.962393	0.999925	0.60256	0.000158533	0.999936	0.999956	0.887139	0.999982	0.56037	0.984662	0.00298773	0.747239	0.985601	0.690612	0.338047	0.999996	0.999842	0.0598026	0.984983	0.999939	0.971638	0.949273	0.550487	0.0193475	0.407725	0.999967	0.947682	0.999951	0.67655	0.779411	0.635977	0.999963	0.946851	0.960042	0.687906	0.780118	0.394478	0.999996	0.964709	0.932819
Pxmp4	PXMP4	Female-biased	0.000924535	0.716878	0.032307	0.790421	0.839226	0.199935	0.172829	0.166383	0.999925	0.478579	0.885148	0.999936	0.999956	0.907207	0.996566	0.164177	0.343884	0.605837	0.273029	0.829325	0.0140241	0.942949	0.999996	0.767412	0.813082	0.946978	0.999939	0.851249	0.999915	0.544141	0.586865	0.30256	0.999967	0.961605	0.999951	0.445735	0.304172	0.508698	0.999963	0.805638	0.960042	0.215401	0.0128955	0.364528	0.999996	0.261236	0.932819
Prkx	PRKX	Female-biased	0.00138819	0.16368	0.971737	0.919496	0.887983	0.982226	0.168537	0.183492	0.999925	0.999976	0.980988	0.999936	0.999956	0.907207	0.996566	0.292458	0.356202	0.493802	0.273871	0.330076	0.271781	0.31438	0.999996	0.767956	0.758858	0.946978	0.999939	0.938581	0.949273	0.341419	0.351552	0.407412	0.999967	0.947682	0.999951	0.723135	0.431491	0.691548	0.999963	0.818427	0.960042	0.315467	0.316599	0.2985	0.999996	0.817341	0.932819
Slc25a12	SLC25A12	Female-biased	0.00157511	0.160982	0.304138	0.294627	0.636515	0.0576339	0.34571	0.285515	0.999925	0.861222	0.515343	0.999936	0.999956	0.907207	0.996566	0.0400052	0.699448	0.121896	0.950461	0.447478	0.645659	0.563828	0.999996	0.929685	0.414235	0.999974	0.999939	0.971638	0.962253	0.751854	0.245662	0.360522	0.999967	0.947682	0.999951	0.44675	0.633919	0.718237	0.999963	0.903977	0.968338	0.00756528	0.938522	0.592265	0.999996	0.999976	0.960815
Itpka	ITPKA	Female-biased	0.00159012	0.160791	0.998672	0.472494	0.496468	0.993031	0.180684	0.478796	0.999925	0.999976	0.668748	0.999936	0.999956	0.907207	0.996566	0.134459	0.474263	0.998028	0.455167	0.993676	0.466786	0.437232	0.999996	0.836185	0.999954	0.963213	0.999939	0.953346	0.958875	0.354805	0.373752	0.362193	0.999967	0.947682	0.999951	0.295214	0.993096	0.290629	0.999963	0.999992	0.950269	0.292065	0.317906	0.982979	0.999996	0.817341	0.999996
Pira1	PIR	Female-biased	0.00167612	0.168037	0.480528	0.160557	0.475926	0.998276	0.0418832	0.473967	0.999925	0.922549	0.360638	0.999936	0.999956	0.738051	0.996566	0.740966	0.324585	0.319299	0.739818	0.326194	0.745213	0.742102	0.999996	0.763416	0.624524	0.984983	0.999939	0.971638	0.973317	0.362583	0.0784714	0.351691	0.999967	0.947682	0.999951	0.677688	0.673569	0.676195	0.999963	0.903977	0.960042	0.299899	0.300708	0.998068	0.999996	0.817341	0.999996
Glrx	GLRX	Female-biased	0.00185704	0.227272	0.00418253	0.000656791	0.58359	0.976693	0.289051	0.81584	0.999925	0.173482	0.00674498	0.999936	0.999956	0.907207	0.999982	0.595383	0.13745	0.000128914	0.482609	0.111778	0.0291992	0.678227	0.999996	0.60507	0.00907989	0.963213	0.999939	0.938581	0.973317	0.358866	0.152153	0.562768	0.999967	0.947682	0.999951	0.157413	0.610938	0.451827	0.999963	0.903977	0.960042	0.431767	0.0130035	0.833208	0.999996	0.262283	0.999996
Robo1	ROBO1	Female-biased	0.00204159	0.305559	0.698053	0.00188903	0.161403	0.694914	0.788979	0.276309	0.999925	0.962967	0.0151325	0.999936	0.999956	0.976545	0.996566	0.956755	0.753045	0.0735763	0.378728	0.509815	0.668215	0.139257	0.999996	0.932672	0.322072	0.946978	0.999939	0.971638	0.949273	0.320971	0.643741	0.819217	0.999967	0.961605	0.999951	0.631396	0.617988	0.677943	0.999963	0.903977	0.960042	0.656708	0.933087	0.0935922	0.999996	0.999976	0.932819
Prdx1	PRDX1	Female-biased	0.00209896	0.73628	0.956424	0.00697192	0.802912	0.802635	0.960975	0.832974	0.999925	0.999976	0.0402882	0.999936	0.999956	0.999914	0.999982	0.749591	0.607562	0.225339	0.53865	0.819351	0.68486	0.512491	0.999996	0.887457	0.543422	0.963213	0.999939	0.971638	0.958875	0.665648	0.996636	0.734286	0.999967	0.999993	0.999951	0.668632	0.474174	0.325755	0.999963	0.849788	0.950269	0.953498	0.944674	0.979301	0.999996	0.999976	0.999996
Cd40	CD40	Female-biased	0.00214732	0.275131	0.0658612	0.0124069	0.713701	0.691888	0.695958	0.26272	0.999925	0.647	0.062001	0.999936	0.999956	0.973675	0.996566	0.206545	0.0124773	0.493827	0.996152	0.500551	0.50114	0.51165	0.999996	0.2122	0.758858	0.999974	0.999939	0.953346	0.958875	0.121992	0.121992	0.121992	0.999967	0.947682	0.999951	0.149883	0.0212108	0.614858	0.999963	0.475266	0.960042	0.693999	0.213239	0.669972	0.999996	0.763468	0.960815
Ndufb4	NDUFB4	Female-biased	0.00246122	0.19873	0.244529	0.401811	0.341607	0.103744	0.801421	0.462297	0.999925	0.861222	0.604393	0.999936	0.999956	0.980887	0.996566	0.74216	0.699455	0.00168911	0.940606	0.522619	0.677595	0.16848	0.999996	0.929685	0.0422226	0.999974	0.999939	0.971638	0.949273	0.0646007	0.353189	0.884917	0.999967	0.947682	0.999951	0.559377	0.98562	0.428182	0.999963	0.999992	0.953406	0.78678	0.489399	0.212755	0.999996	0.887152	0.932819
Exosc5	EXOSC5	Female-biased	0.00247569	0.918872	0.865252	0.236058	0.464726	0.666898	0.214334	0.400253	0.999925	0.992587	0.453061	0.999936	0.999956	0.907207	0.996566	0.722559	0.140878	0.168244	0.308368	0.980798	0.806742	0.37205	0.999996	0.607625	0.4749	0.946978	0.999939	0.982087	0.949273	0.724864	0.351792	0.303945	0.999967	0.947682	0.999951	0.799499	0.193135	0.152889	0.999963	0.775838	0.950269	0.805281	0.419906	0.93327	0.999996	0.831081	0.999996
Khdrbs3	KHDRBS3	Female-biased	0.00260462	0.167402	0.163054	0.906474	0.172469	0.999839	0.977847	0.984224	0.999925	0.800507	0.970841	0.999936	0.999956	0.999914	0.999982	0.0883853	0.576071	0.612736	0.595016	0.551914	0.565535	0.538692	0.999996	0.868782	0.818223	0.969531	0.999939	0.95684	0.958875	0.335211	0.321063	0.347623	0.999967	0.947682	0.999951	0.168485	0.992436	0.959421	0.999963	0.999992	0.999961	0.33017	0.334551	0.32932	0.999996	0.817341	0.932819
Anp32e	ANP32E	Female-biased	0.00267411	0.067682	0.761819	0.288139	0.3633	0.592182	0.711025	0.522997	0.999925	0.962967	0.508809	0.999936	0.999956	0.973675	0.996566	0.180877	0.856643	0.660477	0.550815	0.900862	0.660646	0.729707	0.999996	0.974212	0.848292	0.963213	0.999939	0.971638	0.973317	0.0949423	0.960984	0.269351	0.999967	0.999993	0.999951	0.329317	0.862613	0.53059	0.999963	0.991726	0.960042	0.3678	0.647183	0.851884	0.999996	0.92531	0.999996
Cxcl16	CXCL16	Female-biased	0.00275861	0.822342	0.0128958	2.55749e-05	0.164132	0.621033	0.46038	0.473959	0.999925	0.326913	0.000523129	0.999936	0.999956	0.942152	0.996566	0.0928353	0.00198852	0.689078	0.789406	0.319502	0.994455	0.0221416	0.999996	0.064307	0.865667	0.989268	0.999939	0.999994	0.891582	0.825993	0.141817	0.574723	0.999967	0.947682	0.999951	0.0408576	0.0146503	0.0455716	0.999963	0.412614	0.943671	0.653072	0.048628	0.193826	0.999996	0.499394	0.932819
Zbtb33	ZBTB33	Female-biased	0.0027988	0.378814	0.0324225	0.000379205	0.355509	0.0794194	0.210889	0.958852	0.999925	0.478878	0.00450102	0.999936	0.999956	0.907207	0.999982	0.102588	0.204213	0.972475	0.278597	0.407676	0.690418	0.858114	0.999996	0.679736	0.999954	0.946978	0.999939	0.971638	0.999915	0.437615	0.00776116	0.454324	0.999967	0.69757	0.999951	0.526008	0.20933	0.337898	0.999963	0.778536	0.950269	0.117199	0.564934	0.553037	0.999996	0.92531	0.960815
Cox5a	COX5A	Female-biased	0.00300185	0.403166	0.626247	0.0281337	0.535281	0.673194	0.718404	0.521013	0.999925	0.947011	0.111786	0.999936	0.999956	0.973675	0.996566	0.353603	0.945078	0.748593	0.764041	0.711619	0.950402	0.318	0.999996	0.999842	0.893238	0.984983	0.999939	0.999994	0.949273	0.760776	0.538488	0.9872	0.999967	0.961605	0.999951	0.669692	0.995968	0.59385	0.999963	0.999992	0.960042	0.397919	0.931517	0.396911	0.999996	0.999976	0.932819
Fbl	FBL	Female-biased	0.00333871	0.567634	0.571346	0.619542	0.828613	0.849364	0.422166	0.681877	0.999925	0.927461	0.777787	0.999936	0.999956	0.924036	0.996566	0.501777	0.132787	0.368858	0.863495	0.942495	0.852175	0.434562	0.999996	0.598303	0.65663	0.999974	0.999939	0.997419	0.958875	0.781638	0.862431	0.888315	0.999967	0.999993	0.999951	0.671154	0.235194	0.501493	0.999963	0.805125	0.960042	0.605037	0.356125	0.670411	0.999996	0.817341	0.960815
Acp6	ACP6	Female-biased	0.00338066	0.71645	0.789053	0.600366	0.684871	0.686666	0.338892	0.39614	0.999925	0.965433	0.762561	0.999936	0.999956	0.907207	0.996566	0.811854	0.218658	0.915363	0.168787	0.844015	0.986667	0.915708	0.999996	0.689423	0.983324	0.946978	0.999939	0.999994	0.999915	0.573874	0.609937	0.742419	0.999967	0.961605	0.999951	0.741439	0.357209	0.263078	0.999963	0.805638	0.950269	0.978409	0.413626	0.403046	0.999996	0.828729	0.932819
Krtcap2	KRTCAP2	Female-biased	0.00423526	0.415644	0.354138	0.0249813	0.58131	0.664218	0.462013	0.318004	0.999925	0.861222	0.102931	0.999936	0.999956	0.942152	0.996566	0.997433	0.279745	0.00510215	0.444605	0.607072	0.183056	0.194772	0.999996	0.750295	0.079663	0.963213	0.999939	0.938581	0.949273	0.449248	0.316124	0.782431	0.999967	0.947682	0.999951	0.684419	0.0690742	0.668732	0.999963	0.706516	0.960042	0.743682	0.868295	0.19494	0.999996	0.999976	0.932819
Psmb1	PSMB1	Female-biased	0.00438961	0.912786	0.0686965	0.010541	0.193455	0.374207	0.554934	0.964181	0.999925	0.657549	0.0549189	0.999936	0.999956	0.9475	0.999982	0.972111	0.789088	0.043592	0.649429	0.406863	0.0695743	0.470546	0.999996	0.936459	0.24901	0.984983	0.999939	0.938581	0.958875	0.509414	0.288283	0.289785	0.999967	0.947682	0.999951	0.579924	0.275919	0.851394	0.999963	0.805638	0.999961	0.541307	0.14541	0.40917	0.999996	0.720977	0.932819
Glrx2	GLRX2	Female-biased	0.00452464	0.998407	0.225705	0.980463	0.540803	0.538882	0.550966	0.997765	0.999925	0.859591	0.999944	0.999936	0.999956	0.9475	0.999982	0.761803	0.758369	0.762648	0.752402	0.359788	0.133321	0.760762	0.999996	0.932672	0.894941	0.984983	0.999939	0.938581	0.973317	0.6742	0.66958	0.678021	0.999967	0.961605	0.999951	0.405865	0.407653	0.993969	0.999963	0.807921	0.999961	0.657813	0.199043	0.656846	0.999996	0.749095	0.960815
Eefsec	EEFSEC	Female-biased	0.00460165	0.0681117	0.545022	0.0628518	0.590972	0.0665913	0.500953	0.525467	0.999925	0.922549	0.196643	0.999936	0.999956	0.9475	0.996566	0.160339	0.979554	0.140534	0.961004	0.163885	0.959037	0.950769	0.999996	0.999842	0.440306	0.999974	0.999939	0.999994	0.999915	0.0764001	0.527132	0.561695	0.999967	0.961605	0.999951	0.171453	0.989808	0.994912	0.999963	0.999992	0.999961	0.845012	0.234101	0.094595	0.999996	0.785213	0.932819
Vps11	VPS11	Female-biased	0.00469069	0.518173	0.456765	0.736294	0.391528	0.570595	0.574018	0.834493	0.999925	0.912944	0.8596	0.999936	0.999956	0.948775	0.999982	0.455653	0.675719	0.482536	0.602542	0.411135	0.399209	0.253959	0.999996	0.918092	0.752425	0.971988	0.999939	0.941272	0.949273	0.444092	0.907077	0.499762	0.999967	0.999993	0.999951	0.334479	0.789942	0.305951	0.999963	0.951792	0.950269	0.949482	0.305388	0.605237	0.999996	0.817341	0.960815
Nudt12	NUDT12	Female-biased	0.00470403	0.748846	0.74373	0.789522	0.975813	0.841647	0.729544	0.203874	0.999925	0.962967	0.884757	0.999936	0.999956	0.973675	0.996566	0.960651	0.303446	0.488781	0.392438	0.570093	0.293287	0.48168	0.999996	0.760533	0.755115	0.949419	0.999939	0.938581	0.958875	0.937898	0.664444	0.421542	0.999967	0.961605	0.999951	0.691028	0.122024	0.906202	0.999963	0.75439	0.999961	0.687888	0.988348	0.315677	0.999996	0.999976	0.932819
Acvr1	ACVR1	Female-biased	0.00497857	0.530515	0.318256	0.723703	0.994402	0.746416	0.886926	0.169717	0.999925	0.861222	0.853345	0.999936	0.999956	0.999914	0.996566	0.356124	0.631358	0.820926	0.369843	0.54273	0.675033	0.577768	0.999996	0.902681	0.926838	0.946978	0.999939	0.971638	0.964394	0.487917	0.404851	0.316769	0.999967	0.947682	0.999951	0.243324	0.962401	0.789797	0.999963	0.999992	0.996219	0.837083	0.56288	0.352187	0.999996	0.92531	0.932819
Cox5b	COX5B	Female-biased	0.00506477	0.855897	0.962512	0.0146378	0.568436	0.2688	0.803407	0.433665	0.999925	0.999976	0.0698256	0.999936	0.999956	0.981259	0.996566	0.754479	0.9432	0.478448	0.920544	0.362025	0.904285	0.917217	0.999996	0.999842	0.750124	0.999974	0.999939	0.999994	0.999915	0.441369	0.80577	0.268165	0.999967	0.999993	0.999951	0.645247	0.97013	0.997446	0.999963	0.999992	0.999961	0.426858	0.900608	0.894312	0.999996	0.999976	0.999996
Shf	SHF	Female-biased	0.00514461	0.48803	0.999452	0.466404	0.223476	0.492283	0.982474	0.0111313	0.999925	0.999976	0.664374	0.999936	0.999956	0.999914	0.996566	0.741125	0.0387856	0.373069	0.357438	0.3612	0.0405636	0.708443	0.999996	0.384983	0.65749	0.946978	0.999939	0.938581	0.973317	0.996537	0.989227	0.0228737	0.999967	0.999993	0.999951	0.724539	0.0195806	0.740882	0.999963	0.453946	0.978574	0.279346	0.985617	0.260906	0.999996	0.999976	0.932819
Acsl4	ACSL4	Female-biased	0.00559519	0.996936	0.494383	0.468897	0.998947	0.997089	0.565436	0.226532	0.999925	0.922549	0.665801	0.999936	0.999956	0.947799	0.996566	0.968754	0.490079	0.976274	0.532158	0.97486	0.562466	0.532708	0.999996	0.846387	0.999954	0.963213	0.999939	0.956624	0.958875	0.999896	0.394847	0.409675	0.999967	0.947682	0.999951	0.960747	0.38109	0.99953	0.999963	0.807921	0.999961	0.99568	0.936851	0.38175	0.999996	0.999976	0.932819
As3mt	AS3MT	Female-biased	0.0056962	0.555388	0.0283178	0.198059	0.94574	0.368537	0.0054074	0.54462	0.999925	0.453221	0.40837	0.999936	0.999956	0.367015	0.996566	0.26525	0.0035049	0.002025	0.277463	0.993131	0.402335	0.560054	0.999996	0.0925331	0.0470726	0.946978	0.999939	0.943118	0.962047	0.843457	0.668369	0.734413	0.999967	0.961605	0.999951	0.533619	0.21114	0.352471	0.999963	0.78038	0.950269	0.238831	0.000568351	0.588243	0.999996	0.0396411	0.960815
Atp6v1f	ATP6V1F	Female-biased	0.00590751	0.561177	0.881839	0.968284	0.413212	0.65561	0.223443	0.543706	0.999925	0.999976	0.999944	0.999936	0.999956	0.907207	0.996566	0.709432	0.348554	0.035987	0.287016	0.50862	0.883497	0.713918	0.999996	0.767412	0.227753	0.946978	0.999939	0.999994	0.973317	0.917728	0.302462	0.87113	0.999967	0.947682	0.999951	0.82399	0.543259	0.589241	0.999963	0.889616	0.960042	0.503264	0.481532	0.355057	0.999996	0.881459	0.932819
Cmas	CMAS	Female-biased	0.0063798	0.639246	0.335897	0.00023542	0.886786	0.302857	0.0606532	0.969437	0.999925	0.861222	0.0031164	0.999936	0.999956	0.800958	0.999982	0.432813	0.129349	0.128074	0.430455	0.796051	0.254484	0.340351	0.999996	0.591095	0.423169	0.963213	0.999939	0.938581	0.949273	0.316817	0.52013	0.944052	0.999967	0.961605	0.999951	0.506717	0.801797	0.272207	0.999963	0.958254	0.950269	0.677431	0.0465782	0.894723	0.999996	0.491673	0.999996
Lsm2	LSM2	Female-biased	0.0064482	0.817566	0.335165	0.756657	0.139801	0.366666	0.355571	0.3585	0.999925	0.861222	0.869237	0.999936	0.999956	0.907207	0.996566	0.803374	0.115417	0.317232	0.350584	0.352373	0.747736	0.723705	0.999996	0.566539	0.622949	0.946978	0.999939	0.971638	0.973317	0.416385	0.976547	0.0945745	0.999967	0.999993	0.999951	0.390825	0.353709	0.350078	0.999963	0.805638	0.950269	0.644162	0.205309	0.693413	0.999996	0.753872	0.960815
Fn3k	FN3K	Female-biased	0.00646678	0.126667	0.41121	0.647753	0.375289	0.553856	0.0280608	0.31419	0.999925	0.887992	0.800418	0.999936	0.999956	0.676139	0.996566	0.410989	0.000191997	0.166321	0.692887	0.25939	0.187438	0.0387128	0.999996	0.0122517	0.472059	0.984983	0.999939	0.938581	0.932225	0.548506	0.367233	0.938805	0.999967	0.947682	0.999951	0.851625	0.00403784	0.142915	0.999963	0.227221	0.950269	0.0955819	0.0209015	0.135745	0.999996	0.332431	0.932819
Trex1	TREX1	Female-biased	0.00652245	0.0857291	0.745531	0.289608	0.319137	0.270852	0.47684	0.684959	0.999925	0.962967	0.510317	0.999936	0.999956	0.946581	0.996566	0.884755	0.0179183	0.0538787	0.132486	0.690664	0.115718	0.727944	0.999996	0.270259	0.276491	0.946978	0.999939	0.938581	0.973317	0.048299	0.775541	0.662135	0.999967	0.993175	0.999951	0.872987	0.0187553	0.245808	0.999963	0.447291	0.950269	0.663536	0.487204	0.348754	0.999996	0.886794	0.932819
Psmb7	PSMB7	Female-biased	0.0066442	0.919677	0.315551	1.34851e-06	0.471042	0.598883	0.141516	0.895882	0.999925	0.861222	4.73219e-05	0.999936	0.999956	0.906137	0.999982	0.467303	0.466227	0.169027	0.289292	0.810882	0.225314	0.545627	0.999996	0.832802	0.476107	0.946978	0.999939	0.938581	0.958875	0.777036	0.747966	0.571766	0.999967	0.985452	0.999951	0.575331	0.773963	0.337625	0.999963	0.943629	0.950269	0.641095	0.0760126	0.659732	0.999996	0.57276	0.960815
Net1	NET1	Female-biased	0.00694854	0.0494382	0.941756	0.471894	0.648012	0.627121	0.0573369	0.125565	0.999925	0.999976	0.668369	0.999936	0.999956	0.7971	0.996566	0.440321	0.136999	0.535927	0.0805906	0.0205956	0.382305	0.441576	0.999996	0.604364	0.777693	0.946978	0.999939	0.938581	0.958875	0.335582	0.209148	0.487013	0.999967	0.947682	0.999951	0.193698	0.607228	0.412967	0.999963	0.903977	0.950283	0.0593499	0.14774	0.122647	0.999996	0.723385	0.932819
Npc2	NPC2	Female-biased	0.00716695	0.14883	0.00966796	4.54342e-07	0.703726	0.437497	0.268478	0.716351	0.999925	0.2755	1.94949e-05	0.999936	0.999956	0.907207	0.996566	0.583215	0.124315	0.520124	0.925661	0.896871	0.433933	0.584315	0.999996	0.583734	0.770027	0.999974	0.999939	0.953346	0.964674	0.0728239	0.187089	0.988579	0.999967	0.947682	0.999951	0.698928	0.657448	0.714903	0.999963	0.903977	0.968338	0.673532	0.0288307	0.648483	0.999996	0.381495	0.960815
Cdk5	CDK5	Female-biased	0.007481	0.920341	0.976835	0.447133	0.96191	0.686886	0.689566	0.803573	0.999925	0.999976	0.646831	0.999936	0.999956	0.973675	0.999982	0.59614	0.921953	0.392334	0.630324	0.347909	0.836066	0.751579	0.999996	0.999842	0.674612	0.982463	0.999939	0.991906	0.973317	0.787452	0.703541	0.792214	0.999967	0.96594	0.999951	0.323955	0.941025	0.58941	0.999963	0.999992	0.960042	0.763687	0.824651	0.904332	0.999996	0.98514	0.999996
Cox7b	COX7B	Female-biased	0.00784996	0.682501	0.689571	0.369167	0.641019	0.390594	0.689561	0.490755	0.999925	0.962967	0.576156	0.999936	0.999956	0.973675	0.996566	0.784438	0.450133	0.0564439	0.658693	0.519532	0.918523	0.796438	0.999996	0.8258	0.284164	0.984983	0.999939	0.999994	0.981188	0.371617	0.999993	0.415107	0.999967	0.999993	0.999951	0.574683	0.599222	0.668481	0.999963	0.903977	0.960042	0.753526	0.581343	0.876389	0.999996	0.92531	0.999996
Cln3	CLN3	Female-biased	0.00813049	0.955106	0.402791	0.00161894	0.996418	0.794141	0.514289	0.777838	0.999925	0.881629	0.0134749	0.999936	0.999956	0.9475	0.996631	0.649021	0.916875	0.145123	0.368586	0.853294	0.246117	0.505779	0.999996	0.999842	0.444965	0.946978	0.999939	0.938581	0.958875	0.878534	0.889042	0.830571	0.999967	0.999993	0.999951	0.680566	0.494742	0.318773	0.999963	0.863867	0.950269	0.833239	0.328183	0.853743	0.999996	0.817341	0.999996
Cnnm2	CNNM2	Female-biased	0.00815774	0.439153	0.741445	0.021057	0.538771	0.478634	0.625559	0.624974	0.999925	0.962967	0.0911639	0.999936	0.999956	0.971165	0.996566	0.37078	0.888792	0.366628	0.448202	0.402703	0.997877	0.816879	0.999996	0.992303	0.655313	0.963213	0.999939	0.999994	0.989104	0.228828	0.50099	0.916462	0.999967	0.961605	0.999951	0.224746	0.922019	0.705791	0.999963	0.999992	0.964039	0.967379	0.921656	0.4961	0.999996	0.999976	0.960815
Cox7c	COX7C	Female-biased	0.00819325	0.758942	0.767143	0.717675	0.560107	0.95786	0.948057	0.205201	0.999925	0.962967	0.849741	0.999936	0.999956	0.999914	0.996566	0.916237	0.414939	0.0904245	0.845111	0.718156	0.241669	0.371472	0.999996	0.800449	0.359046	0.999974	0.999939	0.938581	0.949273	0.806554	0.874945	0.214817	0.999967	0.999993	0.999951	0.749545	0.182172	0.457017	0.999963	0.775838	0.960042	0.854006	0.793707	0.614214	0.999996	0.972336	0.960815
Lrrc20	LRRC20	Female-biased	0.00857494	0.142541	0.456549	0.43964	0.440213	0.455921	0.996574	0.991298	0.999925	0.912944	0.639835	0.999936	0.999956	0.999914	0.999982	0.185153	0.996351	0.984969	0.491999	0.492738	0.49958	0.98121	0.999996	0.999842	0.999954	0.963213	0.999939	0.953346	0.999915	0.576538	0.576185	0.565542	0.999967	0.961605	0.999951	0.656895	0.648221	0.651548	0.999963	0.903977	0.960042	0.153859	0.622154	0.6065	0.999996	0.92531	0.960815
Pitpnb	PITPNB	Female-biased	0.00861737	0.181987	0.990041	0.515831	0.40026	0.833972	0.403471	0.913096	0.999925	0.999976	0.703415	0.999936	0.999956	0.911062	0.999982	0.998342	0.737187	0.273744	0.551658	0.215105	0.549082	0.65153	0.999996	0.932672	0.594158	0.963213	0.999939	0.953346	0.973317	0.24693	0.533653	0.579018	0.999967	0.961605	0.999951	0.274721	0.813987	0.897778	0.999963	0.964699	0.999961	0.456332	0.577315	0.532946	0.999996	0.92531	0.960815
Psen2	PSEN2	Female-biased	0.0087612	0.0335937	0.116589	0.231991	0.461864	0.193779	0.131388	0.50175	0.999925	0.74413	0.448832	0.999936	0.999956	0.896372	0.996566	0.286399	0.0362099	0.212773	0.330346	0.0841841	0.715536	0.872148	0.999996	0.373403	0.530582	0.946978	0.999939	0.971638	0.999915	0.529609	0.963502	0.963104	0.999967	0.999993	0.999951	0.673703	0.28036	0.61868	0.999963	0.805638	0.960042	0.0253025	0.0430087	0.336786	0.999996	0.46518	0.932819
Slc25a5	SLC25A5	Female-biased	0.00887965	0.235384	0.712275	0.741475	0.722183	0.317736	0.944678	0.230624	0.999925	0.962967	0.862803	0.999936	0.999956	0.999914	0.996566	0.0566248	0.850777	0.960834	0.441682	0.991853	0.56283	0.530746	0.999996	0.971387	0.999954	0.963213	0.999939	0.956624	0.958875	0.871054	0.800951	0.474482	0.999967	0.999993	0.999951	0.174228	0.583457	0.917707	0.999963	0.903977	0.999961	0.187607	0.787894	0.342494	0.999996	0.970146	0.932819
Hic1	HIC1	Female-biased	0.009705	0.997318	0.982707	0.0114231	0.999063	0.193281	0.188324	0.191201	0.999925	0.999976	0.0583743	0.999936	0.999956	0.907207	0.996566	0.751954	0.11164	0.0308517	0.755324	0.341477	0.756868	0.335197	0.999996	0.559776	0.211061	0.984983	0.999939	0.971638	0.949273	0.359137	0.36262	0.357665	0.999967	0.947682	0.999951	0.66236	0.198961	0.653963	0.999963	0.775838	0.960042	0.363576	0.349463	0.36055	0.999996	0.817341	0.932819
Snx2	SNX2	Female-biased	0.0102155	0.654597	0.324145	0.0114165	0.955058	0.667264	0.932223	0.674046	0.999925	0.861222	0.0583743	0.999936	0.999956	0.999914	0.996566	0.272243	0.922554	0.351805	0.547383	0.26353	0.243565	0.247681	0.999996	0.999842	0.645149	0.963213	0.999939	0.938581	0.949273	0.583844	0.571227	0.819364	0.999967	0.961605	0.999951	0.122508	0.442158	0.215037	0.999963	0.827357	0.950269	0.988616	0.386549	0.698702	0.999996	0.824495	0.961089
Yif1a	YIF1A	Female-biased	0.0105408	0.840151	0.957599	0.0746229	0.574505	0.798824	0.461945	0.149649	0.999925	0.999976	0.220997	0.999936	0.999956	0.942152	0.996566	0.411639	0.897344	0.768398	0.475913	0.443448	0.488137	0.169004	0.999996	0.995478	0.896664	0.963213	0.999939	0.953346	0.949273	0.734604	0.611674	0.505501	0.999967	0.961605	0.999951	0.22077	0.656787	0.594263	0.999963	0.903977	0.960042	0.971718	0.599473	0.189061	0.999996	0.92531	0.932819
Tbl1x	TBL1X	Female-biased	0.0108126	0.325406	0.414666	0.398003	0.451957	0.341248	0.316486	0.383933	0.999925	0.889114	0.600745	0.999936	0.999956	0.907207	0.996566	0.487828	0.268108	0.854946	0.974092	0.343557	0.698053	0.358831	0.999996	0.741225	0.947177	0.999974	0.999939	0.971638	0.949273	0.338221	0.367918	0.420862	0.999967	0.947682	0.999951	0.1991	0.561849	0.479854	0.999963	0.896402	0.960042	0.870606	0.347214	0.547424	0.999996	0.817341	0.960815
Hes1	HES1	Female-biased	0.0116287	0.316096	0.392103	0.347584	0.318895	0.269749	0.531695	0.296959	0.999925	0.874724	0.558438	0.999936	0.999956	0.9475	0.996566	0.804231	0.0496531	0.0545422	0.90922	0.639012	0.681996	0.830823	0.999996	0.424543	0.278719	0.999974	0.999939	0.971638	0.993204	0.298686	0.462811	0.313961	0.999967	0.961605	0.999951	0.895374	0.162035	0.952879	0.999963	0.775838	0.999961	0.518068	0.156726	0.766733	0.999996	0.734239	0.982408
Fcgr2b	FCGR2B	Female-biased	0.0117035	0.516492	0.891577	0.813774	0.0530438	0.495387	0.981939	0.5293	0.999925	0.999976	0.901957	0.999936	0.999956	0.999914	0.996566	0.946625	0.479643	0.239782	0.5704	0.970446	0.571568	0.51565	0.999996	0.838252	0.557525	0.964701	0.999939	0.95684	0.958875	0.32893	0.932735	0.0652649	0.999967	0.999993	0.999951	0.944799	0.400594	0.955754	0.999963	0.807921	0.999961	0.982257	0.915597	0.369888	0.999996	0.999976	0.932819
Il3ra	IL3RA	Male-biased	9.17071e-05	0.744124	0.329527	0.105376	0.0250245	0.742448	0.106293	0.742857	0.999925	0.861222	0.276933	0.999936	0.999956	0.874503	0.996566	0.123466	0.753425	0.754066	0.343192	0.346695	0.750547	0.346613	0.999996	0.932672	0.894714	0.946978	0.999939	0.971638	0.949273	0.998682	0.0642773	0.0615999	0.999967	0.947682	0.999951	0.0918346	0.997874	0.996172	0.999963	0.999992	0.999961	0.663329	0.658075	0.193833	0.999996	0.92531	0.932819
Rbbp9	RBBP9	Male-biased	0.000167829	0.299953	0.260273	0.76282	0.744334	0.27276	0.629207	0.28118	0.999925	0.861222	0.870895	0.999936	0.999956	0.971956	0.996566	0.800291	0.148654	0.800449	0.419699	0.858949	0.61337	0.907384	0.999996	0.621419	0.912049	0.963213	0.999939	0.966507	0.999915	0.155101	0.656685	0.341578	0.999967	0.961605	0.999951	0.697089	0.389208	0.531795	0.999963	0.807921	0.960042	0.964364	0.251604	0.584134	0.999996	0.804852	0.960815
Lgals1	LGALS1	Male-biased	0.000233628	0.821462	0.408087	5.07519e-05	0.627186	0.503176	0.745602	0.530307	0.999925	0.885433	0.000900033	0.999936	0.999956	0.973675	0.996566	0.60103	0.372282	3.34249e-06	0.583817	0.941006	0.699574	0.101105	0.999996	0.770045	0.00067446	0.968618	0.999939	0.971638	0.949273	0.448217	0.331407	0.903039	0.999967	0.947682	0.999951	0.605305	0.274315	0.0675839	0.999963	0.805638	0.950269	0.785772	0.757462	0.49916	0.999996	0.953921	0.960815
Arpc5	ARPC5	Male-biased	0.000244011	0.792848	0.452338	0.380551	0.335334	0.348007	0.33645	0.762538	0.999925	0.910776	0.585935	0.999936	0.999956	0.907207	0.996566	0.198553	0.677246	0.104606	0.984308	0.958305	0.524994	0.187131	0.999996	0.919601	0.386246	0.999974	0.999939	0.953346	0.949273	0.640016	0.246113	0.6469	0.999967	0.947682	0.999951	0.341812	0.456883	0.341056	0.999963	0.838723	0.950269	0.392594	0.878581	0.368192	0.999996	0.999976	0.932819
Cyp1a2	CYP1A2	Male-biased	0.000273692	0.53952	0.121156	0.0898998	0.164019	0.857947	0.0282042	0.239755	0.999925	0.748389	0.248995	0.999936	0.999956	0.676139	0.996566	0.294018	0.171033	0.766073	0.591052	0.10733	0.385515	0.0188076	0.999996	0.645025	0.895763	0.969409	0.999939	0.938581	0.88071	0.797432	0.0346155	0.894766	0.999967	0.947682	0.999951	0.157305	0.232082	0.119682	0.999963	0.800336	0.950269	0.4682	0.521384	0.0270336	0.999996	0.912984	0.932819
Hmox2	HMOX2	Male-biased	0.000296332	0.38137	0.731537	0.00716395	0.80103	0.901298	0.517197	0.426473	0.999925	0.962967	0.0411431	0.999936	0.999956	0.9475	0.996566	0.803706	0.156456	0.0650744	0.524623	0.281039	0.542893	0.810432	0.999996	0.632775	0.303464	0.963213	0.999939	0.953346	0.985927	0.658054	0.857381	0.748595	0.999967	0.999993	0.999951	0.462629	0.265324	0.825396	0.999963	0.805638	0.999961	0.357137	0.362532	0.335873	0.999996	0.817341	0.932819
Plg	PLG	Male-biased	0.000316989	0.615425	0.432042	0.517043	0.419493	0.835368	0.0132068	0.752246	0.999925	0.898862	0.704397	0.999936	0.999956	0.559679	0.996566	0.722008	0.587069	0.317124	0.928689	0.75797	0.0125116	0.338637	0.999996	0.87602	0.622902	0.999974	0.999939	0.841549	0.949273	0.81453	0.162441	0.6944	0.999967	0.947682	0.999951	0.972358	0.144421	0.528327	0.999963	0.775838	0.960042	0.652572	0.0438049	0.47761	0.999996	0.471018	0.960815
Igf1	IGF1	Male-biased	0.000324932	0.27029	0.0852808	0.00179163	0.354149	0.854255	0.374515	0.973445	0.999925	0.707161	0.0146029	0.999936	0.999956	0.907207	0.999982	0.0109454	0.711746	0.120377	0.631259	0.0805385	0.0359368	0.166146	0.999996	0.932672	0.412075	0.983015	0.999939	0.938581	0.949273	0.340125	0.519667	0.504934	0.999967	0.961605	0.999951	0.00529398	0.211899	0.192419	0.999963	0.780811	0.950269	0.539635	0.0922265	0.523907	0.999996	0.610524	0.960815
Dync1li2	DYNC1LI2	Male-biased	0.00032519	0.645766	0.546906	0.914269	0.0652021	0.308975	0.316001	0.143319	0.999925	0.922549	0.977507	0.999936	0.999956	0.907207	0.996566	0.246224	0.3201	0.149689	0.0234821	0.53364	0.142063	0.0910525	0.999996	0.763416	0.451728	0.946978	0.999939	0.938581	0.949273	0.713216	0.301063	0.791652	0.999967	0.947682	0.999951	0.662889	0.0600083	0.615325	0.999963	0.689226	0.960042	0.264909	0.756017	0.01819	0.999996	0.953227	0.932819
Vps54	VPS54	Male-biased	0.000477275	0.0558462	0.310408	0.225811	0.885898	0.750134	0.746421	0.439364	0.999925	0.861222	0.440875	0.999936	0.999956	0.973675	0.996566	0.222298	0.632296	0.754876	0.57023	0.202105	0.216276	0.896128	0.999996	0.903487	0.894714	0.964701	0.999939	0.938581	0.999915	0.312315	0.407231	0.568715	0.999967	0.947682	0.999951	0.969606	0.258773	0.770521	0.999963	0.805638	0.988693	0.0743775	0.567812	0.604372	0.999996	0.92531	0.960815
Lrp1	LRP1	Male-biased	0.000582835	0.260442	0.331133	0.333674	0.344188	0.316018	0.28932	0.368128	0.999925	0.861222	0.549084	0.999936	0.999956	0.907207	0.996566	0.272085	0.260108	0.340353	0.343137	0.305798	0.368517	0.371927	0.999996	0.737102	0.639597	0.946978	0.999939	0.938581	0.949273	0.129631	0.270801	0.560572	0.999967	0.947682	0.999951	0.654716	0.18346	0.741024	0.999963	0.775838	0.978574	0.294865	0.31698	0.362563	0.999996	0.817341	0.932819
Wdr13	WDR13	Male-biased	0.00113623	0.685653	0.72185	0.587	0.88954	0.624537	0.927583	0.928605	0.999925	0.962967	0.751207	0.999936	0.999956	0.999914	0.999982	0.872899	0.705831	0.67274	0.896777	0.948008	0.50204	0.853512	0.999996	0.932672	0.857452	0.999974	0.999939	0.953346	0.999915	0.525807	0.750235	0.87064	0.999967	0.986377	0.999951	0.852265	0.389951	0.794968	0.999963	0.807921	0.997183	0.953138	0.854582	0.972832	0.999996	0.999864	0.999996
Blmh	BLMH	Male-biased	0.00155442	0.759222	0.825258	0.0308713	0.409989	0.9985	0.140902	0.802337	0.999925	0.980217	0.119919	0.999936	0.999956	0.905524	0.999982	0.440474	0.590133	0.959804	0.893498	0.637775	0.246674	0.659514	0.999996	0.878901	0.999954	0.999974	0.999939	0.938581	0.973317	0.820177	0.35312	0.431049	0.999967	0.947682	0.999951	0.367097	0.644837	0.821891	0.999963	0.903977	0.999961	0.838092	0.25871	0.698985	0.999996	0.811643	0.961089
Mrc1	MRC1	Male-biased	0.00161579	0.771699	0.00512975	2.2052e-05	0.459942	0.960058	0.780785	0.286076	0.999925	0.191493	0.000469059	0.999936	0.999956	0.974002	0.996566	0.167648	0.0280172	0.580497	0.191419	0.295406	0.309905	0.328257	0.999996	0.333083	0.795606	0.946978	0.999939	0.938581	0.949273	0.890876	0.136381	0.307047	0.999967	0.947682	0.999951	0.171402	0.473269	0.196985	0.999963	0.849381	0.950269	0.733735	0.00437996	0.738336	0.999996	0.14858	0.975416
Rcbtb2	RCBTB2	Male-biased	0.00230862	0.678207	0.670402	0.212185	0.704159	0.673604	0.679786	0.0451929	0.999925	0.962967	0.427231	0.999936	0.999956	0.973675	0.996566	0.99823	0.396583	0.387837	0.0935101	0.99298	0.389277	0.966891	0.999996	0.787052	0.671052	0.946978	0.999939	0.938581	0.999915	0.611897	0.610952	0.149732	0.999967	0.961605	0.999951	0.994536	0.29393	0.306292	0.999963	0.805638	0.950269	0.995677	0.991184	0.161188	0.999996	0.999976	0.932819
Parp6	PARP6	Male-biased	0.00232249	0.274946	0.80169	0.169188	0.0937656	0.35796	0.269804	0.849835	0.999925	0.969455	0.372567	0.999936	0.999956	0.907207	0.999982	0.50737	0.697397	0.229551	0.864789	0.0953393	0.053892	0.0216634	0.999996	0.928917	0.547197	0.999974	0.999939	0.938581	0.891582	0.901043	0.545878	0.291838	0.999967	0.961605	0.999951	0.362017	0.0478425	0.0342275	0.999963	0.656671	0.844412	0.169112	0.346532	0.195247	0.999996	0.817341	0.932819
Nid1	NID1	Male-biased	0.00254772	0.153974	0.94977	0.144635	0.960912	0.168802	0.950895	0.988426	0.999925	0.999976	0.338333	0.999936	0.999956	0.999914	0.999982	0.881155	0.015809	0.00261169	0.314155	0.679867	0.24353	0.523015	0.999996	0.247443	0.0549096	0.946978	0.999939	0.938581	0.958875	0.170622	0.999441	0.974851	0.999967	0.999993	0.999951	0.88987	0.0653617	0.39014	0.999963	0.695101	0.950269	0.401179	0.0550921	0.57459	0.999996	0.527626	0.960815
Cygb	CYGB	Male-biased	0.00265298	0.308992	0.293539	0.932117	0.705713	0.229949	0.692089	0.874516	0.999925	0.861222	0.988874	0.999936	0.999956	0.973675	0.999982	0.898571	0.0390564	0.400645	0.479711	0.978286	0.350244	0.597599	0.999996	0.384983	0.682459	0.963213	0.999939	0.938581	0.967346	0.0922311	0.603268	0.673966	0.999967	0.961605	0.999951	0.948559	0.0615584	0.430057	0.999963	0.689226	0.953406	0.904102	0.358644	0.888189	0.999996	0.817341	0.999996
Csf2ra	CSF2RA	Male-biased	0.00288037	0.305119	0.0949876	0.734115	0.729561	0.731038	0.732327	0.315508	0.999925	0.729856	0.858994	0.999936	0.999956	0.973675	0.996566	0.751512	0.0999793	0.101181	0.103822	0.725326	0.760549	0.313433	0.999996	0.533938	0.380371	0.946978	0.999939	0.971638	0.949273	0.353897	0.358454	0.36086	0.999967	0.947682	0.999951	0.981562	0.367099	0.089711	0.999963	0.805674	0.950269	0.619257	0.151795	0.631554	0.999996	0.724222	0.960815
Pdlim7	PDLIM7	Male-biased	0.00347746	0.424112	0.36092	0.431794	0.46811	0.141093	0.0998049	0.916265	0.999925	0.861222	0.63192	0.999936	0.999956	0.856251	0.999982	0.438888	0.892482	0.67206	0.686716	0.275333	0.45077	0.282443	0.999996	0.993142	0.857269	0.984983	0.999939	0.953346	0.949273	0.563227	0.0417895	0.603165	0.999967	0.947682	0.999951	0.831371	0.558605	0.334013	0.999963	0.896184	0.950269	0.169412	0.640062	0.609169	0.999996	0.92531	0.960815
Prrg2	PRRG2	Male-biased	0.00379888	0.999716	0.082309	0.0774732	0.266946	0.29288	0.554169	0.167169	0.999925	0.700479	0.227035	0.999936	0.999956	0.9475	0.996566	0.953642	0.563271	0.689211	0.464089	0.264874	0.00530604	0.078222	0.999996	0.86199	0.865688	0.963213	0.999939	0.671438	0.949273	0.430124	0.378938	0.832769	0.999967	0.947682	0.999951	0.375831	0.0148474	0.422527	0.999963	0.412614	0.952368	0.486611	0.130681	0.109587	0.999996	0.692733	0.932819
Phtf1	PHTF1	Male-biased	0.00405971	0.330568	0.327967	0.742213	0.739893	0.740371	0.320416	0.73392	0.999925	0.861222	0.862803	0.999936	0.999956	0.907207	0.996566	0.735173	0.309352	0.72512	0.0945031	0.317234	0.316921	0.0960176	0.999996	0.762382	0.883798	0.946978	0.999939	0.938581	0.949273	0.630632	0.152641	0.618214	0.999967	0.947682	0.999951	0.607539	0.131116	0.0167983	0.999963	0.761667	0.795409	0.388158	0.991637	0.995781	0.999996	0.999976	0.999996
Axin2	AXIN2	Male-biased	0.00411515	0.173578	0.8962	0.190055	0.969822	0.162891	0.967502	0.926389	0.999925	0.999976	0.399711	0.999936	0.999956	0.999914	0.999982	0.336018	0.533131	0.595033	0.930733	0.122828	0.387014	0.0297692	0.999996	0.85673	0.804949	0.999974	0.999939	0.938581	0.927096	0.177184	0.932233	0.978379	0.999967	0.999993	0.999951	0.0453501	0.83688	0.0625694	0.999963	0.977425	0.950269	0.711405	0.364517	0.194417	0.999996	0.817341	0.932819
Npepl1	NPEPL1	Male-biased	0.00413752	0.0430636	0.319339	0.139939	0.492099	0.400179	0.436514	0.144296	0.999925	0.861222	0.331889	0.999936	0.999956	0.931671	0.996566	0.994308	0.940965	0.0159859	0.0292885	0.106076	0.82486	0.528857	0.999996	0.999842	0.148758	0.946978	0.999939	0.988749	0.958875	0.0967535	0.299269	0.639175	0.999967	0.947682	0.999951	0.246647	0.915471	0.249558	0.999963	0.999992	0.950269	0.266474	0.839944	0.0613643	0.999996	0.993738	0.932819
Stat3	STAT3	Male-biased	0.00432202	0.824798	0.228969	0.393119	0.971795	0.973365	0.63191	0.705483	0.999925	0.859591	0.596902	0.999936	0.999956	0.97337	0.996566	0.956871	0.0855961	0.000372616	0.176833	0.771736	0.0108052	0.350799	0.999996	0.509954	0.016386	0.946978	0.999939	0.810215	0.949273	0.883128	0.334774	0.81149	0.999967	0.947682	0.999951	0.823918	0.0100152	0.148754	0.999963	0.33834	0.950269	0.855092	0.477552	0.739405	0.999996	0.879341	0.975416
Rbm19	RBM19	Male-biased	0.00445106	0.994241	0.541775	0.532002	0.994586	0.998287	0.534985	0.227508	0.999925	0.922549	0.714156	0.999936	0.999956	0.9475	0.996566	0.995166	0.996282	0.187018	0.997213	0.999538	0.189886	0.194356	0.999996	0.999842	0.500901	0.999974	0.999939	0.938581	0.949273	0.994639	0.99406	0.384209	0.999967	0.999993	0.999951	0.995797	0.30151	0.303456	0.999963	0.805638	0.950269	0.997222	0.401999	0.409571	0.999996	0.82743	0.932819
Upp1	UPP1	Male-biased	0.00504114	0.0293452	0.764547	0.754786	0.33982	0.341042	0.747004	0.760976	0.999925	0.962967	0.868502	0.999936	0.999956	0.973675	0.996566	0.757418	0.755987	0.746542	0.380009	0.370427	0.772325	0.770775	0.999996	0.932672	0.892988	0.946978	0.999939	0.971638	0.973317	0.0231951	0.634252	0.615767	0.999967	0.961605	0.999951	0.678303	0.67411	0.678599	0.999963	0.903977	0.960042	0.401482	0.987994	0.415201	0.999996	0.999976	0.933873
Gna12	GNA12	Male-biased	0.00516376	0.169898	0.0701238	0.000439285	0.872211	0.215035	0.000244733	0.110008	0.999925	0.663879	0.00502251	0.999936	0.999956	0.0870084	0.996566	0.0345792	0.227346	0.0323443	0.037391	0.633779	0.306693	0.501736	0.999996	0.700715	0.215802	0.946978	0.999939	0.938581	0.958875	0.92742	0.00105898	0.247567	0.999967	0.303846	0.999951	0.265593	0.899466	0.0748641	0.999963	0.999992	0.950269	0.0597684	0.106494	0.277309	0.999996	0.647356	0.932819
Efemp2	EFEMP2	Male-biased	0.00601886	0.0646298	0.512048	0.0483979	0.528875	0.0684056	0.508971	0.522763	0.999925	0.922549	0.164096	0.999936	0.999956	0.9475	0.996566	0.157449	0.967081	0.16922	0.98372	0.149085	0.971345	0.992061	0.999996	0.999842	0.476215	0.999974	0.999939	0.999994	0.999915	0.0754758	0.514981	0.530095	0.999967	0.961605	0.999951	0.162557	0.969431	0.987976	0.999963	0.999992	0.999961	0.687012	0.943552	0.889932	0.999996	0.999976	0.999996
Pnkp	PNKP	Male-biased	0.00609064	0.357646	0.403564	0.224097	0.970459	0.44176	0.313866	0.460488	0.999925	0.882029	0.438629	0.999936	0.999956	0.907207	0.996566	0.581253	0.641654	0.798089	0.287521	0.225221	0.517136	0.796673	0.999996	0.906279	0.910397	0.946978	0.999939	0.953346	0.981188	0.895205	0.124669	0.547129	0.999967	0.947682	0.999951	0.520775	0.293108	0.213246	0.999963	0.805638	0.950269	0.310162	0.915181	0.637624	0.999996	0.999976	0.960815
Srpk2	SRPK2	Male-biased	0.00617643	0.255279	0.132453	0.0593118	0.129511	0.149582	0.558959	0.465968	0.999925	0.76847	0.188926	0.999936	0.999956	0.9475	0.996566	0.480483	0.738367	0.462909	0.705031	0.315696	0.21955	0.251591	0.999996	0.932672	0.738636	0.984983	0.999939	0.938581	0.949273	0.0492217	0.103992	0.0824521	0.999967	0.947682	0.999951	0.205612	0.243939	0.255407	0.999963	0.805638	0.950269	0.842045	0.552403	0.609523	0.999996	0.924968	0.960815
Adh7	ADH4	Male-biased	0.0064255	0.625045	0.865356	0.000101299	0.565945	0.172338	0.00149196	0.510043	0.999925	0.992587	0.00158221	0.999936	0.999956	0.230405	0.996566	0.36112	0.0545795	0.0255848	0.70884	0.825366	0.564745	0.758924	0.999996	0.437691	0.191976	0.984983	0.999939	0.95684	0.973317	0.223762	0.0265991	0.416103	0.999967	0.947682	0.999951	0.511075	0.420456	0.693375	0.999963	0.812614	0.960042	0.507408	0.024538	0.949175	0.999996	0.354897	0.999996
Bbs5	BBS5	Male-biased	0.00656498	0.40535	0.414339	0.401842	0.398215	0.400109	0.388303	0.390889	0.999925	0.889114	0.604393	0.999936	0.999956	0.907207	0.996566	0.994478	0.0526696	0.982982	0.985322	0.996637	0.989616	0.997901	0.999996	0.432598	0.999954	0.999974	0.999939	0.999994	0.999915	0.303478	0.976579	0.295285	0.999967	0.999993	0.999951	0.998482	0.170471	0.988203	0.999963	0.775838	0.999961	0.99378	0.177506	0.991193	0.999996	0.740575	0.999996
Rassf4	RASSF4	Male-biased	0.00709663	0.229805	0.125227	0.151877	0.410852	0.357654	0.482147	0.371503	0.999925	0.756431	0.348896	0.999936	0.999956	0.9475	0.996566	0.27582	0.0344563	0.851915	0.244007	0.416355	0.182564	0.217293	0.999996	0.366446	0.94494	0.946978	0.999939	0.938581	0.949273	0.292461	0.265769	0.393058	0.999967	0.947682	0.999951	0.344298	0.090522	0.235228	0.999963	0.721568	0.950269	0.294001	0.00535268	0.788649	0.999996	0.165525	0.99103
Aldh6a1	ALDH6A1	Male-biased	0.00723925	0.771356	0.165411	0.213051	0.387729	0.425937	0.418756	0.46571	0.999925	0.800507	0.427734	0.999936	0.999956	0.921937	0.996566	0.575399	0.163376	0.0145896	0.149657	0.921937	0.385263	0.119153	0.999996	0.639373	0.140731	0.946978	0.999939	0.938581	0.949273	0.48909	0.168683	0.314085	0.999967	0.947682	0.999951	0.690356	0.178274	0.0786949	0.999963	0.775838	0.950269	0.689181	0.640275	0.914563	0.999996	0.92531	0.999996
Slc39a13	SLC39A13	Male-biased	0.00774808	0.031569	0.407318	0.798692	0.866077	0.810996	0.52598	0.303261	0.999925	0.885433	0.891735	0.999936	0.999956	0.9475	0.996566	0.641905	0.0427939	0.125806	0.496718	0.172359	0.0631249	0.078464	0.999996	0.398378	0.419616	0.963213	0.999939	0.938581	0.949273	0.0953236	0.307351	0.541447	0.999967	0.947682	0.999951	0.545437	0.0160773	0.114238	0.999963	0.416015	0.950269	0.177784	0.890866	0.405616	0.999996	0.999976	0.932819
Hmga1	HMGA1	Male-biased	0.0079555	0.879609	0.918168	0.319122	0.0313954	0.29613	0.323851	0.297956	0.999925	0.999976	0.536976	0.999936	0.999956	0.907207	0.996566	0.547779	0.140423	0.641228	0.606568	0.152595	0.642281	0.0139644	0.999996	0.607625	0.837176	0.971988	0.999939	0.971638	0.866909	0.282215	0.422574	0.2907	0.999967	0.947682	0.999951	0.110124	0.12558	0.108892	0.999963	0.755836	0.950269	0.594826	0.518816	0.065843	0.999996	0.909971	0.932819
Micall2	MICALL2	Male-biased	0.00805302	0.0960775	0.309107	0.737557	0.0219053	0.730833	0.0978698	0.31224	0.999925	0.861222	0.860138	0.999936	0.999956	0.851666	0.996566	0.526741	0.013698	0.198597	0.525704	0.519937	0.980653	0.511949	0.999996	0.226761	0.51573	0.963213	0.999939	0.999994	0.958875	0.151723	0.630553	0.0232547	0.999967	0.961605	0.999951	0.994245	0.0885518	0.988312	0.999963	0.721568	0.999961	0.36201	0.078583	0.35689	0.999996	0.57328	0.932819
S100a1	S100A1	Male-biased	0.00810673	0.140684	0.488759	0.558916	0.222113	0.968754	0.347604	0.857845	0.999925	0.922549	0.728122	0.999936	0.999956	0.907207	0.999982	0.552885	0.28511	0.0490282	0.42671	0.36236	0.535948	0.506615	0.999996	0.751982	0.264674	0.963213	0.999939	0.953346	0.958875	0.346671	0.876298	0.514962	0.999967	0.999993	0.999951	0.838487	0.771978	0.933151	0.999963	0.942595	0.999961	0.238577	0.187758	0.252764	0.999996	0.746469	0.932819
Ankrd40	ANKRD40	Male-biased	0.00850455	0.40669	0.783054	0.00296132	0.970011	0.487188	0.679712	0.54337	0.999925	0.963769	0.0213673	0.999936	0.999956	0.973675	0.996566	0.0604988	0.588988	0.0382861	0.53829	0.659331	0.500814	0.245725	0.999996	0.877897	0.233822	0.963213	0.999939	0.953346	0.949273	0.924646	0.635073	0.655615	0.999967	0.961605	0.999951	0.123781	0.416793	0.237854	0.999963	0.810331	0.950269	0.284156	0.921764	0.684528	0.999996	0.999976	0.960815
Epn1	EPN1	Male-biased	0.00863232	0.705018	0.274749	0.70868	0.694026	0.28367	0.282388	0.286087	0.999925	0.861222	0.842809	0.999936	0.999956	0.907207	0.996566	0.12303	0.124639	0.42924	0.435618	0.999313	0.129128	0.023196	0.999996	0.584888	0.708613	0.963213	0.999939	0.938581	0.891582	0.634149	0.150619	0.643957	0.999967	0.947682	0.999951	0.259813	0.0343374	0.0324251	0.999963	0.566008	0.844412	0.297261	0.989741	0.294276	0.999996	0.999976	0.932819
Hsd17b12	HSD17B12	Male-biased	0.00899305	0.733762	0.595918	0.00368761	0.769709	0.87342	0.881173	0.879351	0.999925	0.932902	0.0252774	0.999936	0.999956	0.999914	0.999982	0.987885	0.622908	0.207277	0.545519	0.532353	0.998091	0.971826	0.999996	0.8976	0.525646	0.963213	0.999939	0.999994	0.999915	0.903614	0.64984	0.9248	0.999967	0.961605	0.999951	0.553369	0.630478	0.534046	0.999963	0.903977	0.960042	0.712226	0.777824	0.742597	0.999996	0.963523	0.975976
C3	C3	Male-biased	0.0094543	0.982725	0.314219	0.000514358	0.736446	0.437745	0.159857	0.944973	0.999925	0.861222	0.00567435	0.999936	0.999956	0.907207	0.999982	0.894781	0.0555164	0.678175	0.417875	0.524468	0.0230219	0.288054	0.999996	0.442026	0.860288	0.963213	0.999939	0.902034	0.949273	0.636498	0.140182	0.799745	0.999967	0.947682	0.999951	0.756964	0.0157807	0.257932	0.999963	0.416015	0.950269	0.516914	0.73695	0.827475	0.999996	0.947435	0.999996
Wdr1	WDR1	Male-biased	0.00970903	0.257893	0.492236	0.0281199	0.483362	0.585452	0.595422	0.659708	0.999925	0.922549	0.111786	0.999936	0.999956	0.954133	0.996566	0.988781	0.106923	0.169988	0.435875	0.570051	0.612112	0.0715699	0.999996	0.552457	0.476938	0.963213	0.999939	0.965613	0.949273	0.168399	0.894942	0.825393	0.999967	0.999993	0.999951	0.661546	0.119139	0.0613668	0.999963	0.753564	0.950269	0.714643	0.456852	0.485203	0.999996	0.859462	0.960815
Cops8	COPS8	Male-biased	0.0110199	0.252601	0.9552	0.8546	0.319542	0.568018	0.642477	0.17732	0.999925	0.999976	0.932552	0.999936	0.999956	0.973675	0.996566	0.0861066	0.784091	0.210992	0.982966	0.241163	0.812838	0.704509	0.999996	0.934331	0.529712	0.999974	0.999939	0.983653	0.973317	0.177002	0.742659	0.0704542	0.999967	0.983496	0.999951	0.0331174	0.976794	0.754735	0.999963	0.999992	0.983383	0.71363	0.742973	0.817992	0.999996	0.94876	0.999996
Nsmaf	NSMAF	Male-biased	0.0116058	0.847601	0.0397179	0.228857	0.556388	0.998391	0.300081	0.0775081	0.999925	0.529546	0.445076	0.999936	0.999956	0.907207	0.996566	0.917766	0.13991	0.164931	0.0808821	0.773045	0.119098	0.58368	0.999996	0.607383	0.470888	0.946978	0.999939	0.938581	0.964674	0.870758	0.370645	0.314579	0.999967	0.947682	0.999951	0.753979	0.9444	0.328316	0.999963	0.999992	0.950269	0.906797	0.0647	0.152958	0.999996	0.550994	0.932819
Mlh3	MLH3	Male-biased	0.0117758	0.315808	0.558981	0.639492	0.0814898	0.400851	0.534984	0.140816	0.999925	0.923716	0.793361	0.999936	0.999956	0.9475	0.996566	0.596551	0.112054	0.152049	0.400989	0.715356	0.675469	0.263423	0.999996	0.560721	0.453788	0.954954	0.999939	0.971638	0.949273	0.250213	0.981635	0.0508949	0.999967	0.999993	0.999951	0.574007	0.209483	0.223985	0.999963	0.778536	0.950269	0.894304	0.341396	0.81915	0.999996	0.817341	0.999996
Inpp5e	INPP5E	Male-biased	0.0117955	0.328753	0.280761	0.294868	0.308537	0.306466	0.293663	0.349293	0.999925	0.861222	0.515343	0.999936	0.999956	0.907207	0.996566	0.334541	0.328627	0.252557	0.337095	0.358141	0.342981	0.297389	0.999996	0.763416	0.571911	0.946978	0.999939	0.938581	0.949273	0.324261	0.294411	0.335103	0.999967	0.947682	0.999951	0.352557	0.342261	0.323612	0.999963	0.805638	0.950269	0.67123	0.79179	0.451083	0.999996	0.972336	0.953127
Mettl7b	0610006F02RIK	#N/A	#N/A	0.69777	0.767596	0.253254	0.90697	0.622191	0.573758	0.459423	0.999925	0.962967	0.471403	0.999936	0.999956	0.948775	0.996566	0.829174	0.655664	0.33851	0.864386	0.733671	0.565992	0.567244	0.999996	0.910837	0.63854	0.999974	0.999939	0.95684	0.962563	0.567401	0.861363	0.577268	0.999967	0.999993	0.999951	0.665904	0.920123	0.75428	0.999963	0.999992	0.983145	0.936005	0.513393	0.632967	0.999996	0.905994	0.960815
Tmem223	0610006I08RIK	#N/A	#N/A	0.0986826	0.876335	0.0492814	0.804368	0.709948	0.621281	0.643847	0.999925	0.998735	0.16611	0.999936	0.999956	0.969177	0.996566	0.0755113	0.800614	0.291754	0.715607	0.627307	0.634191	0.545636	0.999996	0.942518	0.608956	0.984983	0.999939	0.971638	0.958875	0.398065	0.825567	0.645152	0.999967	0.999993	0.999951	0.343327	0.872004	0.488278	0.999963	0.99682	0.960042	0.127666	0.618739	0.86875	0.999996	0.92531	0.999996
Nudt22	0610006K04RIK	#N/A	#N/A	0.0081277	0.332606	0.174357	0.129895	0.946924	0.600503	0.68159	0.999925	0.861222	0.379186	0.999936	0.999956	0.956981	0.996566	0.0096817	0.477497	0.104326	0.724625	0.57485	0.316095	0.0657479	0.999996	0.837451	0.385933	0.984983	0.999939	0.938581	0.949273	0.115681	0.787136	0.500978	0.999967	0.998136	0.999951	0.17268	0.847235	0.3263	0.999963	0.983384	0.950269	0.0202319	0.195952	0.0981674	0.999996	0.748649	0.932819
Atraid	0610007C21RIK	#N/A	#N/A	0.177375	0.834527	0.421854	0.909165	0.737395	0.898869	0.319248	0.999925	0.983763	0.623507	0.999936	0.999956	0.999914	0.996566	0.0934821	0.358872	0.112216	0.443038	0.605862	0.629443	0.693243	0.999996	0.76817	0.399526	0.963213	0.999939	0.971638	0.973317	0.555595	0.962513	0.523898	0.999967	0.999993	0.999951	0.434258	0.360329	0.804653	0.999963	0.805638	0.999961	0.106696	0.740403	0.38537	0.999996	0.948411	0.932819
Tmbim4	0610007H07RIK	#N/A	#N/A	0.916533	0.836886	0.0465543	0.560276	0.603621	0.201391	0.882199	0.999925	0.98441	0.159584	0.999936	0.999956	0.907207	0.999982	0.539279	0.16113	0.204	0.739745	0.258175	0.873096	0.485901	0.999996	0.638082	0.522167	0.984983	0.999939	0.999994	0.958875	0.739062	0.387809	0.558668	0.999967	0.947682	0.999951	0.254303	0.302769	0.497546	0.999963	0.805638	0.960042	0.694021	0.350662	0.783624	0.999996	0.817341	0.990344
Hikeshi	0610007P06RIK	#N/A	#N/A	0.918582	0.718782	0.808835	0.751371	0.442847	0.335242	0.112241	0.999925	0.962967	0.899582	0.999936	0.999956	0.907207	0.996566	0.991965	0.782638	0.806604	0.260391	0.380052	0.0507596	0.573193	0.999996	0.933819	0.916599	0.946978	0.999939	0.938581	0.963841	0.610677	0.721419	0.266169	0.999967	0.973726	0.999951	0.541075	0.128897	0.694461	0.999963	0.758495	0.960042	0.5346	0.224552	0.23395	0.999996	0.776342	0.932819
Erg28	0610007P14RIK	#N/A	#N/A	0.606494	0.185326	0.0133331	0.0600167	0.168928	0.723827	0.00496542	0.999925	0.820777	0.0652754	0.999936	0.999956	0.973675	0.996566	0.233659	0.682659	0.385526	0.13808	0.630242	0.687824	0.0156098	0.999996	0.922819	0.668758	0.946978	0.999939	0.971638	0.871391	0.0644648	0.0972106	0.287552	0.999967	0.947682	0.999951	0.240205	0.995992	0.469259	0.999963	0.999992	0.960042	0.618795	0.576411	0.0118049	0.999996	0.92531	0.932819
Tsr3	0610007P22RIK	#N/A	#N/A	0.876531	0.396463	0.271941	0.439329	0.559669	0.379722	0.660108	0.999925	0.877294	0.491996	0.999936	0.999956	0.907207	0.996566	0.239538	0.461257	0.147733	0.930823	0.0905231	0.00579692	0.609382	0.999996	0.831237	0.44873	0.999974	0.999939	0.676247	0.970748	0.672163	0.985826	0.488582	0.999967	0.999993	0.999951	0.0754182	0.0294115	0.701819	0.999963	0.534272	0.96177	0.671542	0.0998952	0.739402	0.999996	0.630192	0.975416
0610009B22Rik	0610009B22RIK	#N/A	#N/A	0.885179	0.874317	0.0434391	0.70905	0.424875	0.386476	0.232267	0.999925	0.997349	0.152047	0.999936	0.999956	0.907207	0.996566	0.606141	0.0574946	0.66179	0.395676	0.831558	0.249326	0.013042	0.999996	0.444894	0.848923	0.950986	0.999939	0.938581	0.866909	0.550559	0.516624	0.598162	0.999967	0.961605	0.999951	0.834856	0.0449628	0.0280804	0.999963	0.638198	0.825387	0.602164	0.572231	0.219084	0.999996	0.92531	0.932819
Sf3b6	0610009D07RIK	#N/A	#N/A	0.739826	0.309303	0.307713	0.736355	0.305992	0.0944308	0.0972323	0.999925	0.861222	0.526681	0.999936	0.999956	0.851666	0.996566	0.54239	0.0712194	0.553643	0.548588	0.540224	0.546683	0.537826	0.999996	0.473485	0.783392	0.963213	0.999939	0.953346	0.958875	0.61478	0.622179	0.15557	0.999967	0.961605	0.999951	0.998277	0.419194	0.991451	0.999963	0.812026	0.999961	0.357999	0.0760159	0.360197	0.999996	0.57276	0.932819
Emc6	0610009E20RIK	#N/A	#N/A	0.531018	0.312206	0.0469988	0.5459	0.614677	0.686103	0.520423	0.999925	0.861222	0.160739	0.999936	0.999956	0.973675	0.996566	0.597937	0.0546938	0.216857	0.544641	0.696485	0.201056	0.0523708	0.999996	0.438137	0.535225	0.963213	0.999939	0.938581	0.949273	0.448798	0.343731	0.978926	0.999967	0.947682	0.999951	0.490559	0.0230293	0.0625982	0.999963	0.479291	0.950269	0.927714	0.654141	0.366401	0.999996	0.92531	0.932819
Pcgf5	0610009F02RIK	#N/A	#N/A	0.775667	0.281186	0.110385	0.627828	0.401608	0.977296	0.723041	0.999925	0.861222	0.285762	0.999936	0.999956	0.999914	0.996566	0.974579	0.192608	0.0462656	0.847103	0.1999	0.945937	0.734203	0.999996	0.66664	0.256817	0.999974	0.999939	0.999994	0.973317	0.715786	0.492083	0.584624	0.999967	0.961605	0.999951	0.340658	0.320687	0.699347	0.999963	0.805638	0.960582	0.395232	0.400367	0.920524	0.999996	0.82743	0.999996
Crls1	0610009I22RIK	#N/A	#N/A	0.95521	0.218269	0.422407	0.49096	0.955301	0.24497	0.516558	0.999925	0.858132	0.623629	0.999936	0.999956	0.907207	0.996566	0.338471	0.350883	0.816406	0.790532	0.283365	0.390071	0.0996245	0.999996	0.767412	0.923108	0.989268	0.999939	0.938581	0.949273	0.999936	0.100796	0.977093	0.999967	0.947682	0.999951	0.136431	0.18598	0.154977	0.999963	0.775838	0.950269	0.937812	0.960707	0.357259	0.999996	0.999976	0.932819
Rnf215	0610009J22RIK	#N/A	#N/A	0.35964	0.841429	0.133137	0.281786	0.644777	0.752398	0.617719	0.999925	0.986512	0.321267	0.999936	0.999956	0.973675	0.996566	0.900624	0.580798	0.0128483	0.260259	0.0895348	0.480001	0.0611068	0.999996	0.87236	0.130511	0.946978	0.999939	0.953346	0.949273	0.785997	0.761013	0.355537	0.999967	0.989741	0.999951	0.252053	0.365927	0.0383178	0.999963	0.805674	0.866912	0.216722	0.91579	0.59346	0.999996	0.999976	0.960815
Mul1	0610009K11RIK	#N/A	#N/A	0.240053	0.675586	0.695361	0.252019	0.677705	0.715801	0.69648	0.999925	0.962967	0.834388	0.999936	0.999956	0.973675	0.996566	0.998169	0.291963	0.333548	0.332597	0.329764	0.949189	0.998335	0.999996	0.754544	0.633833	0.946978	0.999939	0.999994	0.999915	0.286313	0.970503	0.30287	0.999967	0.999993	0.999951	0.334933	0.26962	0.337629	0.999963	0.805638	0.950269	0.575659	0.569847	0.577977	0.999996	0.92531	0.960815
Spacdr	0610009M14RIK	#N/A	#N/A	0.294253	0.73652	0.0030736	0.718907	0.2925	0.295667	0.305985	0.999925	0.962967	0.0219383	0.999936	0.999956	0.907207	0.996566	0.164916	0.997835	0.00119454	0.988373	0.479083	0.475969	0.493834	0.999996	0.999842	0.0348375	0.999974	0.999939	0.953346	0.958875	0.998128	0.409644	0.409359	0.999967	0.947682	0.999951	0.675982	0.670187	0.675226	0.999963	0.903977	0.960042	0.0747136	0.527569	0.554141	0.999996	0.914792	0.960815
Mfsd10	0610009O03RIK	#N/A	#N/A	0.336491	0.864712	0.084367	0.543415	0.719318	0.0307947	0.750892	0.999925	0.992458	0.238955	0.999936	0.999956	0.678373	0.996566	0.262977	0.0480005	0.991007	0.667778	0.855451	0.730559	0.887547	0.999996	0.417683	0.999954	0.984983	0.999939	0.971638	0.999915	0.624397	0.108534	0.45787	0.999967	0.947682	0.999951	0.455999	0.190888	0.651565	0.999963	0.775838	0.960042	0.408992	0.143018	0.854574	0.999996	0.715865	0.999996
Dele1	0610009O20RIK	#N/A	#N/A	0.946646	0.175729	0.204213	0.574356	0.648493	0.114966	0.408613	0.999925	0.809114	0.417371	0.999936	0.999956	0.87563	0.996566	0.549082	0.077914	0.0320165	0.563558	0.291194	0.0884694	0.794794	0.999996	0.490041	0.214809	0.963213	0.999939	0.938581	0.981154	0.733426	0.878903	0.369847	0.999967	0.999993	0.999951	0.205023	0.960285	0.515073	0.999963	0.999992	0.960042	0.765939	0.034091	0.837798	0.999996	0.41102	0.999996
Hoga1	0610010D20RIK	#N/A	#N/A	0.512409	0.683131	0.332892	0.598544	0.700124	0.00012826	0.165347	0.999925	0.962967	0.548794	0.999936	0.999956	0.0655284	0.996566	0.265851	0.0936295	0.0695931	0.265755	0.376096	0.108117	0.712968	0.999996	0.521835	0.313947	0.946978	0.999939	0.938581	0.973317	0.424497	0.00187675	0.147604	0.999967	0.369267	0.999951	0.196403	0.960878	0.332826	0.999963	0.999992	0.950269	0.860616	0.0206052	0.57091	0.999996	0.332131	0.960815
Sdhaf1	0610010E21RIK	#N/A	#N/A	0.460128	0.870875	0.0211838	0.45339	0.714303	0.660617	0.478776	0.999925	0.995096	0.0915977	0.999936	0.999956	0.973675	0.996566	0.746915	0.971947	0.916794	0.613413	0.907734	0.772816	0.579564	0.999996	0.999842	0.984153	0.975867	0.999939	0.971638	0.964401	0.503093	0.714546	0.378846	0.999967	0.969778	0.999951	0.889004	0.86424	0.477726	0.999963	0.991963	0.960042	0.748197	0.812503	0.971283	0.999996	0.979914	0.999996
Brox	0610010K06RIK	#N/A	#N/A	0.403832	0.642875	0.20449	0.824968	0.660731	0.568655	0.446012	0.999925	0.953324	0.417708	0.999936	0.999956	0.948093	0.996566	0.368829	0.444318	0.129827	0.20465	0.794229	0.503763	0.700173	0.999996	0.821109	0.425312	0.946978	0.999939	0.953346	0.973317	0.800977	0.516102	0.731687	0.999967	0.961605	0.999951	0.699936	0.393049	0.323565	0.999963	0.807921	0.950269	0.312539	0.931544	0.432838	0.999996	0.999976	0.942318
0610010K14Rik	0610010K14RIK	#N/A	#N/A	0.102131	0.46552	0.404158	0.786181	0.79848	0.681335	0.415173	0.999925	0.915897	0.606318	0.999936	0.999956	0.973675	0.996566	0.181112	0.259826	0.166907	0.738547	0.709827	0.398369	0.874645	0.999996	0.736967	0.472554	0.984983	0.999939	0.941272	0.999915	0.327766	0.426162	0.447701	0.999967	0.948157	0.999951	0.529608	0.212721	0.909789	0.999963	0.780811	0.999961	0.189631	0.821853	0.701883	0.999996	0.984366	0.961253
Ccdc127	0610011N22RIK	#N/A	#N/A	0.69601	0.784853	0.066651	0.228776	0.0633204	0.672293	0.270826	0.999925	0.963769	0.204949	0.999936	0.999956	0.973675	0.996566	0.242912	0.263892	0.0548584	0.234762	0.262638	0.6691	0.259212	0.999996	0.738739	0.279763	0.946978	0.999939	0.971638	0.949273	0.189906	0.89374	0.925267	0.999967	0.999993	0.999951	0.964844	0.174708	0.955678	0.999963	0.775838	0.999961	0.181388	0.677698	0.176195	0.999996	0.92531	0.932819
Golt1a	0610012C01RIK	#N/A	#N/A	0.761353	0.584495	0.594726	0.753038	0.918337	0.138372	0.0460291	0.999925	0.932283	0.757432	0.999936	0.999956	0.905524	0.996566	0.593971	0.530777	0.547892	0.188461	0.344259	0.113095	0.271632	0.999996	0.856548	0.782506	0.946978	0.999939	0.938581	0.949273	0.896215	0.194823	0.267752	0.999967	0.947682	0.999951	0.332485	0.150751	0.88249	0.999963	0.775838	0.999961	0.754252	0.46293	0.0813036	0.999996	0.864873	0.932819
Aspdh	0610012D14RIK	#N/A	#N/A	0.235575	0.0940215	0.00107651	0.202493	0.332409	0.354124	0.582522	0.999925	0.729856	0.00989207	0.999936	0.999956	0.907207	0.996566	0.65478	0.498519	0.165239	0.947815	0.383165	0.253416	0.606517	0.999996	0.850669	0.471162	0.999974	0.999939	0.938581	0.97066	0.864104	0.0556258	0.169919	0.999967	0.947682	0.999951	0.809972	0.312241	0.744918	0.999963	0.805638	0.980318	0.170185	0.613949	0.631864	0.999996	0.92531	0.960815
Dynlt2b	0610012D17RIK	#N/A	#N/A	0.418896	0.313372	0.387051	0.289228	0.380228	0.349468	0.271136	0.999925	0.861222	0.591478	0.999936	0.999956	0.907207	0.996566	0.42066	0.392238	0.342512	0.275872	0.380555	0.278591	0.286429	0.999996	0.783008	0.641246	0.946978	0.999939	0.938581	0.949273	0.447766	0.42358	0.650043	0.999967	0.947682	0.999951	0.653883	0.162919	0.880654	0.999963	0.775838	0.999961	0.40505	0.337886	0.287656	0.999996	0.817341	0.932819
0610012G03Rik	0610012G03RIK	#N/A	#N/A	0.240102	0.632788	0.122196	0.629646	0.991033	0.613415	0.75414	0.999925	0.949405	0.304613	0.999936	0.999956	0.965379	0.996566	0.619575	0.736116	0.938607	0.889406	0.521274	0.537906	0.365125	0.999996	0.932672	0.996252	0.999974	0.999939	0.953346	0.949273	0.343379	0.982373	0.891808	0.999967	0.999993	0.999951	0.910947	0.829996	0.425727	0.999963	0.973719	0.953406	0.461436	0.536465	0.61637	0.999996	0.916942	0.960815
Them7	0610012H03RIK	#N/A	#N/A	0.123865	0.166466	0.282942	0.847295	0.767945	0.194423	0.0345065	0.999925	0.800507	0.503091	0.999936	0.999956	0.907207	0.996566	0.0353779	0.638787	0.851169	0.0230694	0.811066	0.706714	0.908881	0.999996	0.90486	0.944675	0.946978	0.999939	0.971638	0.999915	0.370201	0.0663445	0.166988	0.999967	0.947682	0.999951	0.0847649	0.529119	0.106183	0.999963	0.883647	0.950269	0.209695	0.950564	0.113958	0.999996	0.999976	0.932819
Neurl4	0610025P10RIK	#N/A	#N/A	0.7716	0.780354	0.779482	0.775049	0.777225	0.774846	0.782329	0.999925	0.96375	0.87724	0.999936	0.999956	0.973675	0.996762	0.527725	0.212917	0.53066	0.211807	0.532969	0.215727	0.215511	0.999996	0.684291	0.775084	0.946978	0.999939	0.938581	0.949273	0.688454	0.692727	0.694187	0.999967	0.962065	0.999951	0.330324	0.0621704	0.0618222	0.999963	0.689226	0.950269	0.995875	0.995966	0.994671	0.999996	0.999976	0.999996
Tmem42	0610027O18RIK	#N/A	#N/A	0.680153	0.753477	0.358878	0.521677	0.232602	0.0548149	0.335281	0.999925	0.962967	0.568993	0.999936	0.999956	0.790117	0.996566	0.516648	0.495953	0.195406	0.33516	0.254781	0.248548	0.412949	0.999996	0.849385	0.511179	0.946978	0.999939	0.938581	0.956317	0.609518	0.152306	0.832515	0.999967	0.947682	0.999951	0.724659	0.733701	0.916895	0.999963	0.922801	0.999961	0.220236	0.208706	0.222028	0.999996	0.757624	0.932819
Glmp	0610031J06RIK	#N/A	#N/A	0.397737	0.334565	0.439161	0.780996	0.439384	0.348208	0.986903	0.999925	0.861222	0.639386	0.999936	0.999956	0.907207	0.999982	0.998087	0.138712	0.159457	0.81158	0.952501	0.133392	0.640775	0.999996	0.607254	0.462871	0.996096	0.999939	0.938581	0.973317	0.300551	0.225701	0.865519	0.999967	0.947682	0.999951	0.971702	0.0966942	0.686886	0.999963	0.727692	0.960042	0.954682	0.983064	0.820123	0.999996	0.999976	0.999996
Aurkaip1	0610033H09RIK	#N/A	#N/A	0.973481	0.629833	0.665601	0.290516	0.876353	0.175516	0.0308127	0.999925	0.948242	0.813053	0.999936	0.999956	0.907207	0.996566	0.879345	0.766515	0.127877	0.0790218	0.792205	0.270934	0.227444	0.999996	0.932672	0.423169	0.946978	0.999939	0.938581	0.949273	0.895028	0.205949	0.416489	0.999967	0.947682	0.999951	0.788063	0.367705	0.708129	0.999963	0.805674	0.965466	0.9313	0.532407	0.0308671	0.999996	0.916129	0.932819
Tsen54	0610034P02RIK	#N/A	#N/A	0.886025	0.772354	0.609653	0.926666	0.228279	0.323148	0.764748	0.999925	0.963222	0.770295	0.999936	0.999956	0.907207	0.996566	0.695586	0.215852	0.630883	0.819432	0.27162	0.869705	0.510709	0.999996	0.685259	0.82984	0.999974	0.999939	0.999994	0.958875	0.385073	0.565763	0.865409	0.999967	0.961605	0.999951	0.463495	0.271617	0.36665	0.999963	0.805638	0.950269	0.400571	0.427147	0.807124	0.999996	0.834863	0.997279
Ccdc163	0610037D15RIK	#N/A	#N/A	0.21173	0.215458	0.529336	0.21339	0.531671	0.528333	0.532706	0.999925	0.853561	0.71259	0.999936	0.999956	0.9475	0.996566	0.755587	0.760372	0.75585	0.755788	0.75741	0.365617	0.759504	0.999996	0.932672	0.894714	0.984983	0.999939	0.938581	0.973317	0.17409	0.175243	0.175443	0.999967	0.947682	0.999951	0.998623	0.388199	0.997194	0.999963	0.807921	0.999961	0.671156	0.678735	0.672656	0.999996	0.92531	0.960815
Gtpbp8	0610037H22RIK	#N/A	#N/A	0.476875	0.995112	0.485096	0.453303	0.968681	0.469398	0.960124	0.999925	0.999976	0.67936	0.999936	0.999956	0.943201	0.999982	0.11827	0.418011	0.443483	0.442354	0.405322	0.109242	0.101781	0.999996	0.802461	0.721676	0.963213	0.999939	0.938581	0.949273	0.555854	0.573171	0.582204	0.999967	0.961605	0.999951	0.0249921	0.0240247	0.0242905	0.999963	0.479595	0.795409	0.666917	0.640568	0.608938	0.999996	0.92531	0.960815
Czib	0610037L13RIK	#N/A	#N/A	0.578356	0.0664849	0.666875	0.57928	0.0718513	0.490469	0.0682361	0.999925	0.647806	0.813663	0.999936	0.999956	0.9475	0.996566	0.383341	0.415123	0.288173	0.271014	0.271216	0.312075	0.361998	0.999996	0.800449	0.60637	0.946978	0.999939	0.938581	0.949273	0.131786	0.108001	0.128252	0.999967	0.947682	0.999951	0.186882	0.255769	0.270025	0.999963	0.805638	0.950269	0.329653	0.366306	0.320066	0.999996	0.817341	0.932819
Sdhaf2	0610038F07RIK	#N/A	#N/A	0.321104	0.379468	0.328171	0.304337	0.376521	0.323671	0.331394	0.999925	0.869552	0.544486	0.999936	0.999956	0.907207	0.996566	0.177938	0.185116	0.977362	0.163967	0.980046	0.992139	0.986665	0.999996	0.662107	0.999954	0.946978	0.999939	0.999994	0.999915	0.328593	0.327847	0.607889	0.999967	0.947682	0.999951	0.334863	0.347871	0.33317	0.999963	0.805638	0.950269	0.354394	0.357108	0.324446	0.999996	0.817341	0.932819
Pbld1	0610038K03RIK	#N/A	#N/A	0.401872	0.388742	0.117691	0.492711	0.711948	0.215122	0.469642	0.999925	0.874724	0.298364	0.999936	0.999956	0.907207	0.996566	0.659225	0.267873	0.0343785	0.206666	0.493646	0.450607	0.969776	0.999996	0.741225	0.223386	0.946978	0.999939	0.953346	0.999915	0.650819	0.0552323	0.971303	0.999967	0.947682	0.999951	0.840445	0.137194	0.31616	0.999963	0.774803	0.950269	0.485565	0.822275	0.417185	0.999996	0.984382	0.933873
Cuta	0610039D01RIK	#N/A	#N/A	0.134275	0.642408	0.394226	0.321576	0.769999	0.987175	0.336549	0.999925	0.952954	0.597623	0.999936	0.999956	0.999914	0.996566	0.359916	0.592062	0.105241	0.0816083	0.709375	0.316799	0.777002	0.999996	0.880429	0.386666	0.946978	0.999939	0.938581	0.973665	0.26674	0.764476	0.984623	0.999967	0.99127	0.999951	0.724694	0.327369	0.341368	0.999963	0.805638	0.950269	0.320703	0.71362	0.121264	0.999996	0.937137	0.932819
Setd6	0610039J04RIK	#N/A	#N/A	0.242973	0.300754	0.0170949	0.884096	0.103874	0.831094	0.77386	0.999925	0.861222	0.0784937	0.999936	0.999956	0.995287	0.996566	0.00137001	0.330095	0.0761247	0.055119	0.7571	0.956008	0.0186873	0.48707	0.763416	0.328145	0.946978	0.999939	0.999994	0.88071	0.753745	0.416251	0.926204	0.999967	0.947682	0.999951	0.0134661	0.458456	0.00502111	0.999963	0.839035	0.558774	0.042921	0.529577	0.741695	0.999996	0.915367	0.975929
Retsat	0610039N19RIK	#N/A	#N/A	0.208309	0.0481108	0.119036	0.231799	0.384923	0.0550309	0.247486	0.999925	0.570151	0.300857	0.999936	0.999956	0.790117	0.996566	0.0280681	0.0635857	0.000878026	0.403194	0.358318	0.0585131	0.508804	0.999996	0.45785	0.0285311	0.955611	0.999939	0.938581	0.958875	0.764225	0.00745286	0.975712	0.999967	0.684259	0.999951	0.0849641	0.042349	0.920279	0.999963	0.624095	0.999961	0.168497	0.966684	0.129882	0.999996	0.999976	0.932819
Txndc12	0610040B21RIK	#N/A	#N/A	0.241852	0.968706	0.102315	0.749785	0.854142	0.219262	0.717723	0.999925	0.999976	0.272463	0.999936	0.999956	0.907207	0.996566	0.332776	0.349199	0.352323	0.328067	0.396122	0.297675	0.358436	0.999996	0.767412	0.64535	0.946978	0.999939	0.938581	0.949273	0.56069	0.456781	0.980061	0.999967	0.961605	0.999951	0.369812	0.329619	0.349601	0.999963	0.805638	0.950269	0.212783	0.269854	0.527117	0.999996	0.817341	0.960815
0610040J01Rik	0610040J01RIK	#N/A	#N/A	0.549242	0.441913	0.0499192	0.273558	0.323371	0.244897	0.136719	0.999925	0.901454	0.167655	0.999936	0.999956	0.907207	0.996566	0.194389	0.104315	0.493671	0.801428	0.109133	0.936923	0.560634	0.999996	0.545772	0.758858	0.991924	0.999939	0.999994	0.962047	0.116412	0.680799	0.0149813	0.999967	0.961605	0.999951	0.0510103	0.231926	0.55882	0.999963	0.800336	0.960042	0.823055	0.278374	0.81664	0.999996	0.817341	0.999932
Sharpin	0610041B22RIK	#N/A	#N/A	0.991194	0.998211	0.16014	0.169671	0.970928	0.956802	0.147489	0.999925	0.999976	0.360338	0.999936	0.999956	0.999914	0.996566	0.999725	0.97047	0.18497	0.153191	0.980003	0.984527	0.163436	0.999996	0.999842	0.498511	0.946978	0.999939	0.999994	0.949273	0.450717	0.410296	0.217591	0.999967	0.947682	0.999951	0.672798	0.763023	0.535177	0.999963	0.937579	0.960042	0.989938	0.977663	0.167658	0.999996	0.999976	0.932819
Tmem167	0610041E09RIK	#N/A	#N/A	0.841771	0.339039	0.00184624	0.800333	0.871441	0.766096	0.950661	0.999925	0.861222	0.0148855	0.999936	0.999956	0.973675	0.999982	0.980384	0.338095	0.108896	0.554922	0.992402	0.863645	0.675153	0.999996	0.765791	0.39314	0.963213	0.999939	0.999994	0.973317	0.839505	0.709815	0.859954	0.999967	0.968537	0.999951	0.993431	0.665586	0.582126	0.999963	0.903977	0.960042	0.967834	0.191139	0.838636	0.999996	0.748649	0.999996
Acta2	0610041G09RIK	#N/A	#N/A	0.211941	0.453648	0.999944	0.249168	0.799943	0.856281	0.390382	0.999925	0.911202	0.999944	0.999936	0.999956	0.999914	0.996566	0.102637	0.821849	0.00632027	0.708502	0.699249	0.57454	0.904023	0.999996	0.95471	0.0916938	0.984983	0.999939	0.958122	0.999915	0.474192	0.683902	0.160485	0.999967	0.961605	0.999951	0.211158	0.833217	0.757704	0.999963	0.975474	0.984	0.303639	0.522331	0.835878	0.999996	0.912987	0.999996
Dusp28	0710001B24RIK	#N/A	#N/A	0.607058	0.667756	0.0814735	0.346353	0.917099	0.807647	0.362434	0.999925	0.962967	0.233416	0.999936	0.999956	0.982707	0.996566	0.46243	0.428701	0.836113	0.384618	0.733683	0.154712	0.356717	0.999996	0.809684	0.936176	0.948377	0.999939	0.938581	0.949273	0.651535	0.891649	0.981567	0.999967	0.999993	0.999951	0.451364	0.128165	0.970079	0.999963	0.7578	0.999961	0.781541	0.650435	0.219139	0.999996	0.92531	0.932819
Ilkap	0710007A14RIK	#N/A	#N/A	0.298698	0.0324554	0.890824	0.432983	0.44169	0.205767	0.59905	0.999925	0.478878	0.959586	0.999936	0.999956	0.907207	0.996566	0.912751	0.0586605	0.177977	0.684118	0.893673	0.255783	0.452403	0.999996	0.447811	0.489247	0.984983	0.999939	0.938581	0.958875	0.0938611	0.372989	0.801747	0.999967	0.947682	0.999951	0.98539	0.546857	0.791991	0.999963	0.889616	0.996695	0.873477	0.056275	0.450748	0.999996	0.53297	0.953127
Naxd	0710008K08RIK	#N/A	#N/A	0.962571	0.965549	0.438315	0.528276	0.994969	0.350413	0.439381	0.999925	0.999976	0.638653	0.999936	0.999956	0.907207	0.996566	0.747317	0.148025	0.253448	0.328996	0.71788	0.602982	0.706142	0.999996	0.62122	0.572949	0.946978	0.999939	0.961043	0.973317	0.966856	0.487176	0.910349	0.999967	0.961605	0.999951	0.612102	0.151555	0.652975	0.999963	0.775838	0.960042	0.979172	0.530004	0.371214	0.999996	0.915558	0.932819
Lamtor4	0910001L09RIK	#N/A	#N/A	0.692641	0.791807	0.459995	0.939644	0.701596	0.705915	0.774446	0.999925	0.966733	0.658547	0.999936	0.999956	0.973675	0.996566	0.972721	0.81565	0.931402	0.807793	0.961533	0.612066	0.860891	0.999996	0.950352	0.992273	0.99535	0.999939	0.965613	0.999915	0.57472	0.934454	0.878684	0.999967	0.999993	0.999951	0.939772	0.801273	0.950239	0.999963	0.957935	0.999961	0.9934	0.662748	0.805079	0.999996	0.92531	0.996568
Aste1	1100001A21RIK	#N/A	#N/A	0.990395	0.538293	0.540263	0.537672	0.54632	0.227203	0.221918	0.999925	0.922549	0.717849	0.999936	0.999956	0.907207	0.996566	0.760278	0.756649	0.751637	0.749289	0.762076	0.756796	0.120609	0.999996	0.932672	0.894182	0.984983	0.999939	0.971638	0.949273	0.673327	0.218865	0.672954	0.999967	0.947682	0.999951	0.998675	0.999891	0.381335	0.999963	0.999992	0.950269	0.670619	0.664687	0.19433	0.999996	0.92531	0.932819
Ankrd13a	1100001D10RIK	#N/A	#N/A	0.894737	0.150334	0.1034	0.186136	0.694653	0.731326	0.375671	0.999925	0.794769	0.273656	0.999936	0.999956	0.973675	0.996566	0.553393	0.478883	0.32498	0.498201	0.760121	0.202993	0.0802053	0.999996	0.83803	0.628032	0.963213	0.999939	0.938581	0.949273	0.717916	0.445135	0.7573	0.999967	0.959187	0.999951	0.48849	0.65455	0.39349	0.999963	0.903977	0.950269	0.852241	0.208257	0.124615	0.999996	0.757418	0.932819
Wfdc21	1100001G20RIK	#N/A	#N/A	0.431742	0.211946	0.577489	0.913767	0.784472	0.881354	0.572966	0.999925	0.849833	0.742983	0.999936	0.999956	0.999914	0.996566	0.267226	0.0574059	0.0677131	0.621004	0.82009	0.311492	0.944323	0.999996	0.444894	0.309392	0.981216	0.999939	0.938581	0.999915	0.747395	0.383201	0.775643	0.999967	0.947682	0.999951	0.441253	0.100397	0.80629	0.999963	0.734145	0.999961	0.390812	0.36914	0.584311	0.999996	0.817341	0.960815
Rpl34	1100001I22RIK	#N/A	#N/A	0.728811	0.429939	0.438623	0.444429	0.703676	0.685669	0.438847	0.999925	0.898124	0.638978	0.999936	0.999956	0.973675	0.996566	0.493978	0.173623	0.353384	0.206734	0.472357	0.891638	0.210185	0.999996	0.647485	0.6464	0.946978	0.999939	0.999994	0.949273	0.617958	0.789788	0.295976	0.999967	0.999483	0.999951	0.322132	0.287308	0.0831228	0.999963	0.805638	0.950269	0.9807	0.396248	0.994543	0.999996	0.82743	0.999996
Pdlim5	1110001A05RIK	#N/A	#N/A	0.709137	0.308285	0.758577	0.310792	0.756345	0.728708	0.724387	0.999925	0.861222	0.869707	0.999936	0.999956	0.973675	0.996566	0.570003	0.996834	0.119201	0.601065	0.984345	0.582715	0.989001	0.999996	0.999842	0.410149	0.971832	0.999939	0.959087	0.999915	0.969428	0.407551	0.407425	0.999967	0.947682	0.999951	0.741482	0.756043	0.775007	0.999963	0.93392	0.991228	0.56099	0.563183	0.569544	0.999996	0.92531	0.960815
Kti12	1110001A12RIK	#N/A	#N/A	0.755341	0.72116	0.0246957	0.745214	0.75167	0.71976	0.329303	0.999925	0.962967	0.102149	0.999936	0.999956	0.973675	0.996566	0.987528	0.541959	0.209528	0.529239	0.99119	0.540793	0.0684945	0.999996	0.856923	0.529285	0.963213	0.999939	0.953346	0.949273	0.592	0.541835	0.575102	0.999967	0.961605	0.999951	0.983376	0.345478	0.0645477	0.999963	0.805638	0.950269	0.997648	0.999089	0.430598	0.999996	0.999976	0.942178
Tmem126b	1110001A23RIK	#N/A	#N/A	0.62706	0.638643	0.150253	0.479179	0.811158	0.942042	0.0204692	0.999925	0.952504	0.346984	0.999936	0.999956	0.999914	0.996566	0.273925	0.659423	0.0500292	0.0668863	0.667777	0.347399	0.308203	0.999996	0.91222	0.266608	0.946978	0.999939	0.938581	0.949273	0.853972	0.767825	0.21519	0.999967	0.991349	0.999951	0.299898	0.346998	0.558946	0.999963	0.805638	0.960042	0.629985	0.718043	0.0501688	0.999996	0.939474	0.932819
Bpnt2	1110001C20RIK	#N/A	#N/A	0.614196	0.861269	0.732774	0.978676	0.690222	0.923455	0.7995	0.999925	0.99193	0.858583	0.999936	0.999956	0.999914	0.999982	0.48017	0.620928	0.44797	0.63136	0.79928	0.681007	0.47154	0.999996	0.896683	0.726286	0.983015	0.999939	0.971638	0.958875	0.946138	0.863052	0.858073	0.999967	0.999993	0.999951	0.762188	0.54752	0.42684	0.999963	0.889616	0.953406	0.478143	0.950367	0.857354	0.999996	0.999976	0.999996
Fmc1	1110001J03RIK	#N/A	#N/A	0.334112	0.61855	0.229699	0.593665	0.735417	0.750109	0.772541	0.999925	0.940305	0.446216	0.999936	0.999956	0.973675	0.996566	0.44757	0.394556	0.929903	0.783259	0.472809	0.945048	0.512512	0.999996	0.785771	0.991525	0.987604	0.999939	0.999994	0.958875	0.676512	0.905514	0.871514	0.999967	0.999993	0.999951	0.975024	0.560318	0.77667	0.999963	0.896402	0.991684	0.330462	0.540238	0.537136	0.999996	0.916942	0.960815
Nudt16l1	1110001K21RIK	#N/A	#N/A	0.314698	0.970865	0.0574229	0.430649	0.652745	0.824788	0.125332	0.999925	0.999976	0.185112	0.999936	0.999956	0.991446	0.996566	0.478746	0.301599	0.531059	0.330395	0.904622	0.442986	0.142447	0.999996	0.759127	0.7753	0.946978	0.999939	0.953346	0.949273	0.216864	0.873023	0.508768	0.999967	0.999993	0.999951	0.423413	0.0920714	0.620031	0.999963	0.721568	0.960042	0.7336	0.875846	0.166838	0.999996	0.999976	0.932819
Sptssa	1110002B05RIK	#N/A	#N/A	0.911288	0.552579	0.494078	0.377017	0.658435	0.518228	0.0906343	0.999925	0.922549	0.686542	0.999936	0.999956	0.9475	0.996566	0.454046	0.43728	0.295838	0.0925479	0.220948	0.464672	0.562785	0.999996	0.816012	0.611286	0.946978	0.999939	0.953346	0.962047	0.823694	0.407762	0.572815	0.999967	0.947682	0.999951	0.230628	0.357086	0.485627	0.999963	0.805638	0.960042	0.684855	0.969157	0.0684037	0.999996	0.999976	0.932819
Tomm6	1110002E23RIK	#N/A	#N/A	0.742652	0.121792	0.200527	0.574401	0.515968	0.365568	0.680632	0.999925	0.748389	0.412094	0.999936	0.999956	0.907207	0.996566	0.832892	0.274676	0.673613	0.995715	0.871435	0.738869	0.857615	0.999996	0.747895	0.857931	0.999974	0.999939	0.971638	0.999915	0.497451	0.0971876	0.499718	0.999967	0.947682	0.999951	0.966723	0.233906	0.875521	0.999963	0.803264	0.999961	0.819676	0.639173	0.915204	0.999996	0.92531	0.999996
Tefm	1110002N22RIK	#N/A	#N/A	0.796619	0.231882	0.525015	0.666068	0.999056	0.897695	0.0278783	0.999925	0.859591	0.708817	0.999936	0.999956	0.999914	0.996566	0.469189	0.206761	0.846071	0.233307	0.641692	0.946121	0.132955	0.999996	0.681837	0.942519	0.946978	0.999939	0.999994	0.949273	0.847944	0.424043	0.178451	0.999967	0.947682	0.999951	0.374761	0.367745	0.807074	0.999963	0.805674	0.999961	0.863644	0.380806	0.0857522	0.999996	0.824144	0.932819
Zfp579	1110003A17RIK	#N/A	#N/A	0.343612	0.640575	0.00122804	0.92438	0.0985173	0.190728	0.549314	0.999925	0.952954	0.0109803	0.999936	0.999956	0.907207	0.996566	0.340794	0.941173	0.314911	0.923591	0.082294	0.37901	0.639871	0.999996	0.999842	0.621462	0.999974	0.999939	0.938581	0.973317	0.10579	0.26151	0.657923	0.999967	0.947682	0.999951	0.0699447	0.573159	0.794939	0.999963	0.898267	0.997183	0.564908	0.501924	0.69121	0.999996	0.896938	0.960815
Smim14	1110003E01RIK	#N/A	#N/A	0.710073	0.284246	0.00286023	0.646916	0.62004	0.967319	0.893077	0.999925	0.861222	0.0208133	0.999936	0.999956	0.999914	0.999982	0.873681	0.985411	0.0447555	0.584724	0.396498	0.224553	0.357933	0.999996	0.999842	0.251995	0.968709	0.999939	0.938581	0.949273	0.922309	0.385642	0.64345	0.999967	0.947682	0.999951	0.432699	0.167221	0.106703	0.999963	0.775838	0.950269	0.579234	0.507936	0.835318	0.999996	0.901267	0.999996
Tmem107	1110004B13RIK	#N/A	#N/A	0.721031	0.0747923	0.963481	0.771619	0.666642	0.519618	0.26083	0.999925	0.67196	0.999944	0.999936	0.999956	0.9475	0.996566	0.320555	0.320271	0.330851	0.388292	0.353277	0.429954	0.326808	0.999996	0.763416	0.631425	0.949419	0.999939	0.953346	0.949273	0.957583	0.400832	0.545542	0.999967	0.947682	0.999951	0.342974	0.378287	0.362701	0.999963	0.807921	0.950269	0.590572	0.104431	0.335665	0.999996	0.642513	0.932819
1110004F10Rik	1110004F10RIK	#N/A	#N/A	0.0863035	0.0850237	0.719749	0.291913	0.71265	0.731517	0.716621	0.999925	0.706889	0.850934	0.999936	0.999956	0.973675	0.996566	0.714546	0.257768	0.258545	0.715222	0.268988	0.708626	0.0658758	0.999996	0.736967	0.579322	0.984983	0.999939	0.971638	0.949273	0.125339	0.128296	0.601492	0.999967	0.947682	0.999951	0.536835	0.52664	0.075949	0.999963	0.882779	0.950269	0.364852	0.353921	0.351759	0.999996	0.817341	0.932819
Fam98c	1110006G06RIK	#N/A	#N/A	0.703218	0.672683	0.206269	0.212469	0.674812	0.0370512	0.207664	0.999925	0.962967	0.420083	0.999936	0.999956	0.702091	0.996566	0.979312	0.111143	0.40874	0.99535	0.431273	0.404288	0.0206203	0.999996	0.559162	0.691045	0.999974	0.999939	0.943203	0.890127	0.974583	0.166112	0.990997	0.999967	0.947682	0.999951	0.534463	0.549304	0.0793309	0.999963	0.890018	0.950269	0.61956	0.122428	0.12843	0.999996	0.685285	0.932819
Tmem109	1110006I15RIK	#N/A	#N/A	0.605232	0.844386	0.171802	0.71727	0.785656	0.932936	0.441167	0.999925	0.986677	0.37538	0.999936	0.999956	0.999914	0.996566	0.610872	0.830252	0.640306	0.243581	0.848443	0.71921	0.768724	0.999996	0.958882	0.836633	0.946978	0.999939	0.971638	0.973317	0.607619	0.854822	0.788571	0.999967	0.999993	0.999951	0.521611	0.598768	0.420544	0.999963	0.903977	0.95178	0.851166	0.931742	0.391192	0.999996	0.999976	0.932819
Mcmbp	1110007A13RIK	#N/A	#N/A	0.897874	0.753121	0.012358	0.666264	0.372762	0.561744	0.879248	0.999925	0.962967	0.061881	0.999936	0.999956	0.9475	0.999982	0.401785	0.997317	0.0435806	0.824397	0.919526	0.794057	0.623177	0.999996	0.999842	0.24901	0.999974	0.999939	0.977635	0.972703	0.398699	0.459329	0.628171	0.999967	0.961605	0.999951	0.462117	0.835461	0.576592	0.999963	0.976448	0.960042	0.636148	0.869036	0.862753	0.999996	0.999976	0.999996
Arsb	1110007C02RIK	#N/A	#N/A	0.805115	0.682965	0.207864	0.0487459	0.302573	0.295689	0.412762	0.999925	0.962967	0.422059	0.999936	0.999956	0.907207	0.996566	0.942335	0.863077	0.205745	0.824969	0.394406	0.379397	0.515748	0.999996	0.978631	0.524278	0.999974	0.999939	0.938581	0.958875	0.62931	0.693778	0.095251	0.999967	0.962362	0.999951	0.66879	0.697603	0.81381	0.999963	0.905112	0.999961	0.283304	0.224603	0.312081	0.999996	0.776342	0.932819
Josd2	1110007C05RIK	#N/A	#N/A	0.885788	0.658825	0.8006	0.689677	0.223004	0.467953	0.613966	0.999925	0.960842	0.893089	0.999936	0.999956	0.942846	0.996566	0.470475	0.883679	0.11876	0.531551	0.495857	0.297171	0.765574	0.999996	0.989981	0.409543	0.963213	0.999939	0.938581	0.973317	0.3355	0.79722	0.924482	0.999967	0.999993	0.999951	0.968854	0.395956	0.755178	0.999963	0.807921	0.983383	0.417356	0.489016	0.591638	0.999996	0.887152	0.960815
Maco1	1110007C24RIK	#N/A	#N/A	0.225642	0.026997	0.0841445	0.699447	0.452915	0.110319	0.735102	0.999925	0.442433	0.238686	0.999936	0.999956	0.874503	0.996566	0.23148	0.00340038	0.00674928	0.190687	0.481378	0.507208	0.533706	0.999996	0.0916603	0.0947183	0.946978	0.999939	0.953346	0.958875	0.748376	0.649148	0.974001	0.999967	0.961605	0.999951	0.739092	0.115237	0.207591	0.999963	0.753337	0.950269	0.164516	0.0106276	0.600947	0.999996	0.231819	0.960815
Get4	1110007L15RIK	#N/A	#N/A	0.544741	0.032301	0.944754	0.0954513	0.778476	0.38704	0.0282653	0.999925	0.478579	0.995217	0.999936	0.999956	0.907207	0.996566	0.40264	0.6341	0.637876	0.136288	0.919282	0.0424463	0.0787663	0.999996	0.904065	0.835505	0.946978	0.999939	0.938581	0.949273	0.814701	0.338228	0.67977	0.999967	0.947682	0.999951	0.559665	0.321198	0.859135	0.999963	0.805638	0.999961	0.545049	0.0471831	0.0136106	0.999996	0.493339	0.932819
Ndufaf4	1110007M04RIK	#N/A	#N/A	0.0163526	0.171752	0.0399653	0.279	0.74045	0.970156	0.554606	0.999925	0.803449	0.143383	0.999936	0.999956	0.999914	0.996566	0.293064	0.11766	0.384214	0.0826731	0.199741	0.678939	0.703979	0.999996	0.570051	0.667352	0.946978	0.999939	0.971638	0.973317	0.149711	0.363442	0.733337	0.999967	0.947682	0.999951	0.885616	0.235758	0.204532	0.999963	0.805638	0.950269	0.053051	0.311369	0.234018	0.999996	0.817341	0.932819
Rab5if	1110008F13RIK	#N/A	#N/A	0.295204	0.631382	0.0224933	0.998406	0.46131	0.789521	0.915809	0.999925	0.949405	0.0953441	0.999936	0.999956	0.976568	0.999982	0.898017	0.558404	0.915974	0.665796	0.891638	0.446069	0.601971	0.999996	0.860737	0.983765	0.984983	0.999939	0.953346	0.96785	0.168196	0.556247	0.934587	0.999967	0.961605	0.999951	0.995788	0.382195	0.534559	0.999963	0.807921	0.960042	0.840598	0.89185	0.945313	0.999996	0.999976	0.999996
Rita1	1110008J03RIK	#N/A	#N/A	0.469198	0.454158	0.451931	0.136381	0.994341	0.982871	0.449321	0.999925	0.911356	0.651751	0.999936	0.999956	0.999914	0.996566	0.983511	0.0344678	0.99646	0.981305	0.475142	0.155484	0.452355	0.999996	0.366446	0.999954	0.999974	0.999939	0.938581	0.958875	0.544671	0.546583	0.0729437	0.999967	0.961605	0.999951	0.563947	0.0103682	0.542934	0.999963	0.341535	0.960042	0.657132	0.633574	0.641158	0.999996	0.92531	0.960815
Bbln	1110008P14RIK	#N/A	#N/A	0.669876	0.0993094	0.00151842	0.37022	0.635026	0.00485642	0.244682	0.999925	0.729856	0.0128386	0.999936	0.999956	0.35265	0.996566	0.973962	0.00166539	0.0158405	0.296373	0.940002	0.481822	0.443444	0.999996	0.0570357	0.148574	0.946978	0.999939	0.953346	0.958875	0.379761	0.20549	0.78728	0.999967	0.947682	0.999951	0.934567	0.0532006	0.829418	0.999963	0.67974	0.999961	0.977748	0.0147219	0.243193	0.999996	0.284636	0.932819
Elof1	1110011K10RIK	#N/A	#N/A	0.16817	0.115124	0.0648045	0.453643	0.332734	0.701278	0.188916	0.999925	0.741019	0.200926	0.999936	0.999956	0.973675	0.996566	0.161376	0.851107	0.93792	0.367032	0.459673	0.110771	0.324658	0.999996	0.971462	0.99609	0.946978	0.999939	0.938581	0.949273	0.647464	0.196828	0.532589	0.999967	0.947682	0.999951	0.566693	0.233301	0.942831	0.999963	0.803254	0.999961	0.19707	0.275773	0.254683	0.999996	0.817341	0.932819
Tmem198b	1110012D08RIK	#N/A	#N/A	0.773216	0.770476	0.162141	0.300215	0.452923	0.0440173	0.743648	0.999925	0.962967	0.362112	0.999936	0.999956	0.739616	0.996566	0.307292	0.34792	0.320791	0.321675	0.2936	0.276471	0.300069	0.999996	0.767412	0.625274	0.946978	0.999939	0.938581	0.949273	0.530533	0.287592	0.41111	0.999967	0.947682	0.999951	0.307824	0.318052	0.318017	0.999963	0.805638	0.950269	0.687881	0.05348	0.537245	0.999996	0.523742	0.960815
Atp13a2	1110012E06RIK	#N/A	#N/A	0.215341	0.542985	0.534461	0.989517	0.997439	0.537951	0.21174	0.999925	0.922549	0.715333	0.999936	0.999956	0.9475	0.996566	0.7528	0.750362	0.768969	0.129583	0.130225	0.756032	0.765633	0.999996	0.932672	0.896904	0.946978	0.999939	0.971638	0.973317	0.361639	0.370361	0.361557	0.999967	0.947682	0.999951	0.19482	0.652566	0.198083	0.999963	0.903977	0.950269	0.405229	0.9959	0.397938	0.999996	0.999976	0.932819
Eola1	1110012L19RIK	#N/A	#N/A	0.282111	0.250281	0.267894	0.354007	0.37657	0.32537	0.341261	0.999925	0.861222	0.487335	0.999936	0.999956	0.907207	0.996566	0.301613	0.371034	0.422356	0.349718	0.393365	0.293338	0.361834	0.999996	0.770027	0.703236	0.946978	0.999939	0.938581	0.949273	0.331656	0.291357	0.351918	0.999967	0.947682	0.999951	0.35015	0.335555	0.360282	0.999963	0.805638	0.950269	0.371529	0.4344	0.9067	0.999996	0.840315	0.999996
Mvb12a	1110012M11RIK	#N/A	#N/A	0.853682	0.186713	0.0429003	0.126529	0.627802	0.988427	0.47515	0.999925	0.821447	0.150797	0.999936	0.999956	0.999914	0.996566	0.937707	0.496	0.472923	0.208546	0.706402	0.529397	0.329346	0.999996	0.849385	0.746627	0.946978	0.999939	0.953346	0.949273	0.542175	0.226566	0.446639	0.999967	0.947682	0.999951	0.683233	0.962441	0.794149	0.999963	0.999992	0.997183	0.85889	0.438676	0.191572	0.999996	0.843519	0.932819
Nsmce2	1110014D18RIK	#N/A	#N/A	0.598324	0.576085	0.0176816	0.126468	0.5671	0.517483	0.119271	0.999925	0.930165	0.0805926	0.999936	0.999956	0.9475	0.996566	0.654491	0.622424	0.195396	0.68191	0.655392	0.625004	0.0382103	0.999996	0.897561	0.511179	0.984983	0.999939	0.970749	0.932225	0.784641	0.597424	0.851513	0.999967	0.961605	0.999951	0.999154	0.997526	0.155773	0.999963	0.999992	0.950269	0.585141	0.549265	0.131309	0.999996	0.923235	0.932819
Tmed4	1110014L17RIK	#N/A	#N/A	0.532348	0.718947	0.000155856	0.749748	0.827393	0.644579	0.777429	0.999925	0.962967	0.00223773	0.999936	0.999956	0.973675	0.996615	0.217719	0.384041	0.388032	0.29553	0.498997	0.42199	0.150691	0.999996	0.777727	0.671235	0.946978	0.999939	0.947488	0.949273	0.821336	0.649997	0.983927	0.999967	0.961605	0.999951	0.324207	0.387338	0.202572	0.999963	0.807921	0.950269	0.351952	0.909387	0.504049	0.999996	0.999976	0.960815
Ints1	1110015K06RIK	#N/A	#N/A	0.332203	0.52054	0.671505	0.758877	0.588416	0.462691	0.963892	0.999925	0.922549	0.817217	0.999936	0.999956	0.942152	0.999982	0.727153	0.596278	0.480132	0.332629	0.414147	0.528792	0.490711	0.999996	0.882245	0.75119	0.946978	0.999939	0.953346	0.958875	0.354861	0.398865	0.827862	0.999967	0.947682	0.999951	0.451015	0.453842	0.287111	0.999963	0.836275	0.950269	0.71778	0.938256	0.827328	0.999996	0.999976	0.999996
Tma7	1110017O22RIK	#N/A	#N/A	0.983716	0.357032	0.153735	0.757547	0.345932	0.130458	0.678133	0.999925	0.861222	0.35079	0.999936	0.999956	0.896372	0.996566	0.766471	0.34982	0.569369	0.827718	0.717189	0.462691	0.77175	0.999996	0.767412	0.789985	0.999974	0.999939	0.953346	0.973317	0.381319	0.560788	0.492581	0.999967	0.961605	0.999951	0.968198	0.901098	0.757129	0.999963	0.999992	0.983874	0.575301	0.164878	0.950619	0.999996	0.740575	0.999996
Arel1	1110018G07RIK	#N/A	#N/A	0.736993	0.555894	0.398299	0.117969	0.749981	0.797227	0.949587	0.999925	0.922549	0.600991	0.999936	0.999956	0.980148	0.999982	0.393423	0.130245	0.589491	0.202436	0.801092	0.22328	0.899962	0.999996	0.592934	0.801251	0.946978	0.999939	0.938581	0.999915	0.989884	0.534979	0.23293	0.999967	0.961605	0.999951	0.454168	0.0734197	0.43252	0.999963	0.707439	0.954537	0.661123	0.823001	0.312099	0.999996	0.984619	0.932819
Prxl2c	1110018J18RIK	#N/A	#N/A	0.56581	0.426264	0.237746	0.597365	0.433487	0.838684	0.10566	0.999925	0.896377	0.454317	0.999936	0.999956	0.997603	0.996566	0.268895	0.672279	0.529415	0.320278	0.824245	0.165253	0.258688	0.999996	0.917381	0.774983	0.946978	0.999939	0.938581	0.949273	0.880757	0.673028	0.429906	0.999967	0.961605	0.999951	0.535418	0.212645	0.922633	0.999963	0.780811	0.999961	0.351425	0.489981	0.143971	0.999996	0.887152	0.932819
Cldnd1	1110019C08RIK	#N/A	#N/A	0.533076	0.528784	0.978256	0.202414	0.513914	0.510639	0.998565	0.999925	0.922549	0.999944	0.999936	0.999956	0.9475	0.999982	0.997861	0.992523	0.996501	0.985314	0.19218	0.192163	0.195985	0.999996	0.999842	0.999954	0.999974	0.999939	0.938581	0.949273	0.983833	0.984631	0.383839	0.999967	0.999993	0.999951	0.359432	0.363687	0.371078	0.999963	0.805638	0.950269	0.360908	0.356635	0.357532	0.999996	0.817341	0.932819
Nfic	1110019L22RIK	#N/A	#N/A	0.813381	0.117226	0.631728	0.760383	0.531433	0.486582	0.710032	0.999925	0.744224	0.786473	0.999936	0.999956	0.9475	0.996566	0.477847	0.153763	0.0736684	0.0407805	0.187336	0.834302	0.111074	0.999996	0.628569	0.322072	0.946978	0.999939	0.991153	0.949273	0.802061	0.566611	0.965746	0.999967	0.961605	0.999951	0.262544	0.492245	0.0499882	0.999963	0.862523	0.950269	0.501397	0.0862645	0.597068	0.999996	0.595455	0.960815
Ciao2b	1110019N10RIK	#N/A	#N/A	0.124146	0.961003	0.0259713	0.348751	0.305519	0.806278	0.488692	0.999925	0.999976	0.106306	0.999936	0.999956	0.982003	0.996566	0.0286338	0.824878	0.4239	0.479543	0.59311	0.923049	0.331487	0.999996	0.956831	0.704193	0.963213	0.999939	0.999994	0.949273	0.744166	0.904224	0.323053	0.999967	0.999993	0.999951	0.273941	0.936213	0.28755	0.999963	0.999992	0.950269	0.0401745	0.803704	0.83366	0.999996	0.975884	0.999996
Tmem70	1110020A09RIK	#N/A	#N/A	0.671524	0.712469	0.87284	0.765383	0.774545	0.882684	0.628202	0.999925	0.962967	0.946496	0.999936	0.999956	0.999914	0.996566	0.344992	0.469566	0.426227	0.588071	0.408832	0.78357	0.887101	0.999996	0.833463	0.705433	0.968786	0.999939	0.973885	0.999915	0.565793	0.857502	0.879706	0.999967	0.999993	0.999951	0.231825	0.494971	0.783296	0.999963	0.863867	0.993197	0.931056	0.74651	0.624537	0.999996	0.949687	0.960815
Prr13	1110020C13RIK	#N/A	#N/A	0.478764	0.147185	0.028231	0.261146	0.498122	0.908488	0.034774	0.999925	0.790108	0.112053	0.999936	0.999956	0.999914	0.996566	0.950956	0.908515	0.461813	0.0462292	0.970369	0.181356	0.592115	0.999996	0.999842	0.737518	0.946978	0.999939	0.938581	0.964674	0.157971	0.167159	0.278882	0.999967	0.947682	0.999951	0.946238	0.322411	0.306753	0.999963	0.805638	0.950269	0.985968	0.376883	0.0755182	0.999996	0.820911	0.932819
Nadk2	1110020G09RIK	#N/A	#N/A	0.994695	0.541553	0.540935	0.228336	0.997866	0.531371	0.992726	0.999925	0.922549	0.717849	0.999936	0.999956	0.9475	0.999982	0.999793	0.556761	0.241891	0.565017	0.996756	0.550642	0.561942	0.999996	0.860527	0.559639	0.963213	0.999939	0.953346	0.962047	0.994653	0.991059	0.383267	0.999967	0.999993	0.999951	0.997624	0.994939	0.997479	0.999963	0.999992	0.999961	0.997826	0.400623	0.412102	0.999996	0.82743	0.932819
Ints12	1110020M19RIK	#N/A	#N/A	0.306408	0.380492	0.37575	0.347424	0.2998	0.384682	0.326969	0.999925	0.869552	0.582606	0.999936	0.999956	0.907207	0.996566	0.867111	0.0400476	0.246299	0.327703	0.678745	0.0534677	0.783965	0.999996	0.387601	0.564673	0.946978	0.999939	0.938581	0.977437	0.310537	0.388825	0.344019	0.999967	0.947682	0.999951	0.723674	0.0217237	0.447226	0.999963	0.479291	0.960042	0.832308	0.908539	0.544378	0.999996	0.999976	0.960815
Uqcr10	1110020P15RIK	#N/A	#N/A	0.925541	0.679031	0.471249	0.467998	0.399882	0.611224	0.56743	0.999925	0.962967	0.667871	0.999936	0.999956	0.963491	0.996566	0.727532	0.301081	0.045797	0.781176	0.519097	0.257637	0.275375	0.999996	0.759127	0.255355	0.987013	0.999939	0.938581	0.949273	0.573936	0.491528	0.907145	0.999967	0.961605	0.999951	0.807721	0.0883399	0.504259	0.999963	0.721568	0.960042	0.536694	0.949893	0.394745	0.999996	0.999976	0.932819
Ufc1	1110021H02RIK	#N/A	#N/A	0.252718	0.741002	0.85821	0.975653	0.617201	0.383457	0.390661	0.999925	0.962967	0.935796	0.999936	0.999956	0.907207	0.996566	0.434068	0.182999	0.148478	0.914614	0.505953	0.386369	0.499831	0.999996	0.660036	0.449711	0.999974	0.999939	0.938581	0.958875	0.634707	0.385053	0.546583	0.999967	0.947682	0.999951	0.938824	0.163462	0.712801	0.999963	0.775838	0.967947	0.270846	0.711885	0.546874	0.999996	0.935846	0.960815
Nmral1	1110025F24RIK	#N/A	#N/A	0.993073	0.845817	7.49408e-05	0.51226	0.280346	0.543027	0.0237891	0.999925	0.98747	0.00122163	0.999936	0.999956	0.9475	0.996566	0.588082	0.407291	0.000489531	0.773555	0.80576	0.805776	0.0630469	0.999996	0.794104	0.0197087	0.985434	0.999939	0.981595	0.949273	0.460194	0.778316	0.259254	0.999967	0.993933	0.999951	0.86522	0.539482	0.359717	0.999963	0.887392	0.950269	0.436209	0.560534	0.0407452	0.999996	0.92531	0.932819
Mrap	1110025G12RIK	#N/A	#N/A	0.14341	0.331595	0.0323702	0.43566	0.40739	0.023055	0.992062	0.999925	0.861222	0.123809	0.999936	0.999956	0.669761	0.999982	0.0970509	0.00784517	0.0195575	0.30781	0.539069	0.604476	0.79653	0.999996	0.159471	0.165552	0.946978	0.999939	0.961445	0.981188	0.666951	0.366101	0.602933	0.999967	0.947682	0.999951	0.481675	0.145294	0.403613	0.999963	0.775838	0.950269	0.0943159	0.0207954	0.561783	0.999996	0.332326	0.960815
Tm2d3	1110025I09RIK	#N/A	#N/A	0.378119	0.657054	0.430597	0.688941	0.445576	0.494669	0.650031	0.999925	0.960061	0.630979	0.999936	0.999956	0.9475	0.996566	0.388509	0.762644	0.369327	0.565819	0.465857	0.568173	0.701747	0.999996	0.932672	0.656817	0.963213	0.999939	0.95684	0.973317	0.258395	0.434802	0.970129	0.999967	0.953727	0.999951	0.208233	0.483812	0.876707	0.999963	0.858318	0.999961	0.932287	0.865212	0.548636	0.999996	0.999976	0.960815
Fitm1	1110028A07RIK	#N/A	#N/A	0.976224	0.148581	0.0910288	0.971875	0.9029	0.169665	0.928108	0.999925	0.793872	0.250753	0.999936	0.999956	0.907207	0.999982	0.409056	0.00189172	0.00146716	0.376132	0.378527	0.112182	0.417881	0.999996	0.0622185	0.0391208	0.946978	0.999939	0.938581	0.958875	0.409981	0.682655	0.763267	0.999967	0.961605	0.999951	0.29354	0.00616836	0.29659	0.999963	0.275766	0.950269	0.963364	0.166777	0.950158	0.999996	0.740575	0.999996
Slc44a2	1110028E10RIK	#N/A	#N/A	0.496083	0.0785333	3.21386e-06	0.425773	0.573719	0.166144	0.628085	0.999925	0.681929	9.59787e-05	0.999936	0.999956	0.907207	0.996566	0.656823	0.00325969	0.0841309	0.982047	0.148399	0.604156	0.285106	0.999996	0.0894738	0.348575	0.999974	0.999939	0.961306	0.949273	0.920114	0.738554	0.791047	0.999967	0.981949	0.999951	0.215552	0.0248696	0.469011	0.999963	0.48734	0.960042	0.447927	0.062545	0.434259	0.999996	0.544661	0.943212
Nat9	1110028N05RIK	#N/A	#N/A	0.370814	0.0734616	0.0245564	0.247602	0.443344	0.0118617	0.661997	0.999925	0.668682	0.101751	0.999936	0.999956	0.534342	0.996566	0.309569	0.0185084	0.00696973	0.265749	0.492028	0.0388242	0.600972	0.999996	0.276368	0.0960074	0.946978	0.999939	0.938581	0.967727	0.929673	0.584979	0.622538	0.999967	0.961605	0.999951	0.816908	0.822327	0.678911	0.999963	0.969504	0.960042	0.233255	0.0042883	0.25098	0.999996	0.147482	0.932819
Med11	1110030J09RIK	#N/A	#N/A	0.764357	0.0405022	0.221614	0.944555	0.763739	0.288278	0.806742	0.999925	0.532827	0.435302	0.999936	0.999956	0.907207	0.999982	0.832093	0.163234	0.690829	0.670241	0.831481	0.101942	0.797358	0.999996	0.639373	0.865887	0.984983	0.999939	0.938581	0.981708	0.70663	0.513747	0.843643	0.999967	0.961605	0.999951	0.793635	0.875307	0.674553	0.999963	0.998631	0.960042	0.999473	0.0184838	0.887286	0.999996	0.317845	0.999996
Snap47	1110031B06RIK	#N/A	#N/A	0.855699	0.587896	0.0123865	0.500282	0.353301	0.189143	0.659883	0.999925	0.932283	0.061945	0.999936	0.999956	0.907207	0.996566	0.67124	0.857652	0.361454	0.392277	0.491129	0.544054	0.797714	0.999996	0.974468	0.651496	0.949419	0.999939	0.953346	0.98176	0.597193	0.198107	0.868022	0.999967	0.947682	0.999951	0.851288	0.762605	0.671101	0.999963	0.937317	0.960042	0.440174	0.584053	0.439869	0.999996	0.92531	0.947929
Ogfod3	1110031I02RIK	#N/A	#N/A	0.94043	0.91951	0.0782333	0.704688	0.53619	0.974083	0.941472	0.999925	0.999976	0.228079	0.999936	0.999956	0.999914	0.999982	0.529142	0.553466	0.0144791	0.62316	0.24285	0.64621	0.970897	0.999996	0.859206	0.140208	0.981556	0.999939	0.971638	0.999915	0.630159	0.961983	0.831652	0.999967	0.999993	0.999951	0.21617	0.464684	0.711996	0.999963	0.844558	0.967052	0.69982	0.924662	0.74883	0.999996	0.999976	0.977017
Rbfa	1110032A13RIK	#N/A	#N/A	0.324354	0.236854	0.799806	0.666388	0.1133	0.493927	0.281002	0.999925	0.859591	0.892445	0.999936	0.999956	0.9475	0.996566	0.303332	0.35022	0.0111134	0.941313	0.119234	0.470572	0.209558	0.999996	0.767412	0.122019	0.999974	0.999939	0.953346	0.949273	0.10132	0.738612	0.667667	0.999967	0.981949	0.999951	0.124124	0.895423	0.470219	0.999963	0.999992	0.960042	0.638283	0.166448	0.259017	0.999996	0.740575	0.932819
Tmed2	1110032D12RIK	#N/A	#N/A	0.982202	0.506253	0.971164	0.992813	0.518737	0.983675	0.506715	0.999925	0.922549	0.999944	0.999936	0.999956	0.999914	0.996566	0.465835	0.479929	0.488321	0.16452	0.168257	0.981094	0.0393702	0.999996	0.838388	0.755115	0.946978	0.999939	0.999994	0.932225	0.640937	0.652457	0.647115	0.999967	0.961605	0.999951	0.123503	0.608142	0.0156731	0.999963	0.903977	0.795409	0.660663	0.629466	0.635507	0.999996	0.92531	0.960815
Dus1l	1110032N12RIK	#N/A	#N/A	0.0358277	0.219142	9.2898e-06	0.0284471	0.132034	0.520527	0.00241925	0.999925	0.858301	0.000231965	0.999936	0.999956	0.9475	0.996566	0.109254	0.624595	0.673247	0.403834	0.0397157	0.344955	0.00157854	0.999996	0.898262	0.857611	0.955611	0.999939	0.938581	0.697703	0.010255	0.15795	0.448223	0.999967	0.947682	0.999951	0.0321102	0.38182	0.126017	0.999963	0.807921	0.950269	0.679189	0.698883	0.00217695	0.999996	0.928357	0.932819
Rps4l	1110033J19RIK	#N/A	#N/A	0.348212	0.666026	0.000157025	0.993293	0.261828	0.241983	0.984534	0.999925	0.962967	0.00224588	0.999936	0.999956	0.907207	0.999982	0.331054	0.262496	0.0208239	0.829485	0.250983	0.678545	0.850271	0.999996	0.737958	0.171412	0.999974	0.999939	0.971638	0.999832	0.187504	0.625706	0.994286	0.999967	0.961605	0.999951	0.187593	0.65087	0.798076	0.999963	0.903977	0.998377	0.885391	0.228065	0.983059	0.999996	0.779167	0.999996
Rreb1	1110037N09RIK	#N/A	#N/A	0.606519	0.37154	0.544834	0.774904	0.594762	0.310352	0.734499	0.999925	0.865529	0.719952	0.999936	0.999956	0.907207	0.996566	0.876801	0.149347	0.0645103	0.0728719	0.861881	0.499813	0.257981	0.999996	0.622224	0.303349	0.946978	0.999939	0.953346	0.949273	0.504721	0.936957	0.972772	0.999967	0.999993	0.999951	0.818107	0.58302	0.0500558	0.999963	0.903977	0.950269	0.989352	0.145048	0.62481	0.999996	0.720703	0.960815
Gucd1	1110038D17RIK	#N/A	#N/A	0.72755	0.202376	0.113281	0.0899138	0.262256	0.391674	0.592081	0.999925	0.839242	0.290803	0.999936	0.999956	0.907207	0.996566	0.802645	0.636736	0.0388466	0.572072	0.140814	0.0451479	0.040721	0.999996	0.904607	0.235222	0.964721	0.999939	0.938581	0.932225	0.603278	0.774948	0.429486	0.999967	0.992977	0.999951	0.322334	0.210273	0.223037	0.999963	0.778862	0.950269	0.279867	0.123503	0.10546	0.999996	0.685285	0.932819
1110038F14Rik	1110038F14RIK	#N/A	#N/A	0.468289	0.799955	0.10839	0.479903	0.820519	0.832618	0.251816	0.999925	0.968787	0.282546	0.999936	0.999956	0.995459	0.996566	0.394986	0.43034	0.95648	0.444097	0.990982	0.990893	0.994438	0.999996	0.810707	0.999954	0.963213	0.999939	0.999994	0.999915	0.605031	0.981731	0.317767	0.999967	0.999993	0.999951	0.555594	0.585223	0.594399	0.999963	0.903977	0.960042	0.545711	0.574919	0.588226	0.999996	0.92531	0.960815
Tmem214	1110039B18RIK	#N/A	#N/A	0.963328	0.445285	0.104079	0.491274	0.168325	0.508149	0.532758	0.999925	0.904625	0.275062	0.999936	0.999956	0.9475	0.996566	0.503294	0.971093	0.431199	0.191252	0.531497	0.164741	0.171666	0.999996	0.999842	0.710199	0.946978	0.999939	0.938581	0.949273	0.256386	0.934275	0.29927	0.999967	0.999993	0.999951	0.97343	0.282618	0.0535576	0.999963	0.805638	0.950269	0.398575	0.372484	0.967195	0.999996	0.817341	0.999996
Pithd1	1110049F12RIK	#N/A	#N/A	0.497358	0.464727	0.0321751	0.556731	0.496805	0.460911	0.0451508	0.999925	0.915897	0.123253	0.999936	0.999956	0.942152	0.996566	0.279413	0.284135	0.653914	0.254191	0.705589	0.287139	0.658194	0.999996	0.751982	0.844811	0.946978	0.999939	0.938581	0.973317	0.999548	0.350246	0.102094	0.999967	0.947682	0.999951	0.628335	0.155527	0.630511	0.999963	0.775838	0.960042	0.29558	0.996047	0.257793	0.999996	0.999976	0.932819
Lage3	1110049G11RIK	#N/A	#N/A	0.303819	0.510265	0.000806856	0.841152	0.169763	0.254344	0.377038	0.999925	0.922549	0.00798025	0.999936	0.999956	0.907207	0.996566	0.28945	0.71252	0.061862	0.249588	0.335363	0.965647	0.802998	0.999996	0.932672	0.297675	0.946978	0.999939	0.999994	0.982685	0.78691	0.181633	0.603106	0.999967	0.947682	0.999951	0.949673	0.834432	0.370467	0.999963	0.976163	0.950269	0.12497	0.747862	0.478552	0.999996	0.950332	0.960815
Ankrd46	1110054N06RIK	#N/A	#N/A	0.840445	0.32153	0.0502523	0.843248	0.994187	0.582435	0.248482	0.999925	0.861222	0.168698	0.999936	0.999956	0.95081	0.996566	0.548213	0.409235	0.349202	0.309337	0.688924	0.715327	0.983723	0.999996	0.795043	0.644608	0.946978	0.999939	0.971638	0.999915	0.880846	0.274508	0.334223	0.999967	0.947682	0.999951	0.455622	0.375885	0.437142	0.999963	0.807921	0.958663	0.894138	0.759064	0.509542	0.999996	0.954201	0.960815
Cd302	1110055L24RIK	#N/A	#N/A	0.996057	0.630822	0.0449903	0.43393	0.459521	0.0699647	0.0646658	0.999925	0.949348	0.155941	0.999936	0.999956	0.824503	0.996566	0.920225	0.0832367	0.0409433	0.585838	0.595952	0.685425	0.310272	0.999996	0.503195	0.242413	0.968709	0.999939	0.971638	0.949273	0.613102	0.355793	0.454183	0.999967	0.947682	0.999951	0.73305	0.248396	0.796635	0.999963	0.805638	0.997567	0.593501	0.103154	0.0649559	0.999996	0.641676	0.932819
Ldah	1110057K04RIK	#N/A	#N/A	0.782622	0.00823489	7.5549e-09	0.414062	0.625352	0.904765	0.823156	0.999925	0.248541	4.99158e-07	0.999936	0.999956	0.999914	0.999982	0.0878825	0.00713393	0.979849	0.925938	0.127192	0.831547	0.302907	0.999996	0.149193	0.999954	0.999974	0.999939	0.991153	0.949273	0.611301	0.0887474	0.691034	0.999967	0.947682	0.999951	0.0530349	0.070214	0.484055	0.999963	0.706516	0.960042	0.874326	0.0430015	0.442328	0.999996	0.46518	0.948862
Sdhaf4	1110058L19RIK	#N/A	#N/A	0.119386	0.816598	0.136252	0.332456	0.443266	0.45986	0.465001	0.999925	0.977049	0.326045	0.999936	0.999956	0.942152	0.996566	0.0849052	0.867239	0.51259	0.329349	0.318413	0.666078	0.308856	0.999996	0.980586	0.766454	0.946978	0.999939	0.971638	0.949273	0.579372	0.509703	0.868704	0.999967	0.961605	0.999951	0.52827	0.824682	0.971165	0.999963	0.971017	0.999961	0.102262	0.712523	0.226756	0.999996	0.936339	0.932819
1110059E24Rik	1110059E24RIK	#N/A	#N/A	0.176625	0.0709192	0.249164	0.797526	0.46058	0.464752	0.400722	0.999925	0.664732	0.466932	0.999936	0.999956	0.942152	0.996566	0.707169	0.453372	0.834771	0.393415	0.163279	0.15577	0.93914	0.999996	0.827598	0.935234	0.949708	0.999939	0.938581	0.999915	0.54206	0.284564	0.568722	0.999967	0.947682	0.999951	0.454425	0.618232	0.572201	0.999963	0.903977	0.960042	0.233974	0.149155	0.527933	0.999996	0.723385	0.960815
Rab3gap2	1110059F07RIK	#N/A	#N/A	0.271926	0.51816	0.030647	0.963106	0.635198	0.659625	0.861447	0.999925	0.922549	0.119303	0.999936	0.999956	0.973675	0.999982	0.824073	0.879641	0.0238738	0.627606	0.708347	0.965183	0.715258	0.999996	0.987876	0.184561	0.982463	0.999939	0.999994	0.973317	0.243159	0.416981	0.867989	0.999967	0.947682	0.999951	0.914894	0.939617	0.551969	0.999963	0.999992	0.960042	0.676734	0.891333	0.932567	0.999996	0.999976	0.999996
Mtmr14	1110061O04RIK	#N/A	#N/A	0.855881	0.529236	0.318321	0.84666	0.832963	0.334869	0.597747	0.999925	0.922549	0.536233	0.999936	0.999956	0.907207	0.996566	0.701659	0.44572	0.684043	0.712024	0.43922	0.671376	0.973436	0.999996	0.821531	0.863556	0.984983	0.999939	0.971638	0.999915	0.982935	0.252194	0.599767	0.999967	0.947682	0.999951	0.400903	0.389023	0.768412	0.999963	0.807921	0.987429	0.790763	0.818056	0.820666	0.999996	0.982958	0.999996
Bsdc1	1110063F24RIK	#N/A	#N/A	0.76878	0.0725374	0.119187	0.589315	0.299591	0.712691	0.297933	0.999925	0.668682	0.300857	0.999936	0.999956	0.973675	0.996566	0.670056	0.261082	0.0954817	0.971937	0.437122	0.394296	0.168487	0.999996	0.737958	0.369361	0.999974	0.999939	0.940998	0.949273	0.615119	0.329867	0.733176	0.999967	0.947682	0.999951	0.825207	0.862112	0.400331	0.999963	0.991608	0.950269	0.330938	0.117592	0.251363	0.999996	0.679249	0.932819
Ahsa2	1110064P04RIK	#N/A	#N/A	0.756808	0.638125	0.194872	0.474545	0.457512	0.188566	0.385502	0.999925	0.952276	0.404817	0.999936	0.999956	0.907207	0.996566	0.331311	0.146314	0.438246	0.395547	0.978675	0.810071	0.320118	0.999996	0.617722	0.717532	0.950986	0.999939	0.982846	0.949273	0.74303	0.519287	0.241458	0.999967	0.961605	0.999951	0.50176	0.385174	0.19891	0.999963	0.807921	0.950269	0.489346	0.244269	0.918577	0.999996	0.796152	0.999996
Prrc1	1190002C06RIK	#N/A	#N/A	0.90629	0.684069	0.0217743	0.514017	0.425175	0.229064	0.354224	0.999925	0.962967	0.0933219	0.999936	0.999956	0.907207	0.996566	0.847063	0.136713	0.33078	0.893219	0.422603	0.95345	0.701699	0.999996	0.604364	0.631425	0.999974	0.999939	0.999994	0.973317	0.527857	0.577852	0.281518	0.999967	0.961605	0.999951	0.528466	0.325364	0.742748	0.999963	0.805638	0.979873	0.627405	0.256996	0.8431	0.999996	0.810976	0.999996
Imp3	1190002L16RIK	#N/A	#N/A	0.694127	0.8218	0.105174	0.468097	0.737143	0.847559	0.660583	0.999925	0.979652	0.276861	0.999936	0.999956	0.999914	0.996566	0.537369	0.684775	0.0212134	0.312385	0.192317	0.996616	0.914829	0.999996	0.923956	0.173281	0.946978	0.999939	0.999994	0.999915	0.970601	0.9832	0.853981	0.999967	0.999993	0.999951	0.237256	0.798225	0.572059	0.999963	0.956598	0.960042	0.566405	0.741924	0.362471	0.999996	0.94876	0.932819
Dipk2a	1190002N15RIK	#N/A	#N/A	0.0603627	0.178682	0.0315037	0.46376	0.402156	0.35344	0.751362	0.999925	0.810594	0.121742	0.999936	0.999956	0.907207	0.996566	0.279958	0.258981	0.243566	0.419186	0.384324	0.339589	0.374458	0.999996	0.736967	0.561774	0.963213	0.999939	0.938581	0.949472	0.38289	0.727832	0.734689	0.999967	0.976855	0.999951	0.335769	0.304294	0.401856	0.999963	0.805638	0.950269	0.0962276	0.162466	0.511939	0.999996	0.740223	0.960815
Urah	1190003J15RIK	#N/A	#N/A	0.648816	0.226041	0.479319	0.818449	0.673556	0.483901	0.885953	0.999925	0.859591	0.674801	0.999936	0.999956	0.9475	0.999982	0.69768	0.282372	0.769237	0.943994	0.671645	0.110955	0.873168	0.999996	0.751864	0.896904	0.999974	0.999939	0.938581	0.999915	0.575577	0.227622	0.811209	0.999967	0.947682	0.999951	0.59426	0.088832	0.879812	0.999963	0.721568	0.999961	0.978572	0.683242	0.946158	0.999996	0.92531	0.999996
Trmt1l	1190005F20RIK	#N/A	#N/A	0.613344	0.940292	0.865898	0.332416	0.663246	0.902218	0.633968	0.999925	0.999976	0.941155	0.999936	0.999956	0.999914	0.996566	0.923892	0.381964	0.90695	0.343465	0.860867	0.51391	0.135018	0.999996	0.777432	0.977521	0.946978	0.999939	0.953346	0.949273	0.591109	0.978085	0.410283	0.999967	0.999993	0.999951	0.870429	0.361643	0.149296	0.999963	0.805638	0.950269	0.944395	0.844384	0.621233	0.999996	0.995677	0.960815
1190005I06Rik	1190005I06RIK	#N/A	#N/A	0.954899	0.915904	0.0431442	0.365357	0.497435	0.507776	0.0820141	0.999925	0.999976	0.151441	0.999936	0.999956	0.9475	0.996566	0.509377	0.557131	0.000108855	0.391542	0.956807	0.963419	0.0868021	0.999996	0.860737	0.00812711	0.949419	0.999939	0.999994	0.949273	0.599777	0.518455	0.466336	0.999967	0.961605	0.999951	0.627235	0.612333	0.478405	0.999963	0.903977	0.960042	0.652111	0.732231	0.112916	0.999996	0.945474	0.932819
Llph	1190005P17RIK	#N/A	#N/A	0.802403	0.159824	0.771213	0.393595	0.756935	0.413209	0.385891	0.999925	0.800507	0.87279	0.999936	0.999956	0.915556	0.996566	0.754533	0.747486	0.382933	0.374026	0.786515	0.757634	0.366287	0.999996	0.932672	0.666429	0.946978	0.999939	0.971638	0.949273	0.962788	0.0913783	0.991083	0.999967	0.947682	0.999951	0.971821	0.99099	0.990066	0.999963	0.999992	0.999961	0.720637	0.699243	0.27741	0.999996	0.928393	0.932819
Smim1	1190007F08RIK	#N/A	#N/A	0.815236	0.938461	0.0479463	0.789504	0.852573	0.545359	0.840825	0.999925	0.999976	0.162935	0.999936	0.999956	0.9475	0.999982	0.705787	0.0968502	0.00459877	0.68962	0.66605	0.276937	0.635466	0.999996	0.527903	0.0768107	0.984983	0.999939	0.938581	0.973317	0.755961	0.613535	0.728994	0.999967	0.961605	0.999951	0.459758	0.0188347	0.425421	0.999963	0.447291	0.953406	0.974503	0.724448	0.96476	0.999996	0.941744	0.999996
Smim11	1190017O12RIK	#N/A	#N/A	0.88171	0.439691	0.719722	0.435105	0.454595	0.774177	0.526829	0.999925	0.901135	0.850934	0.999936	0.999956	0.973675	0.996566	0.169056	0.233913	0.849024	0.740232	0.531053	0.562878	0.146338	0.999996	0.707775	0.943977	0.984983	0.999939	0.956624	0.949273	0.591229	0.526399	0.928636	0.999967	0.961605	0.999951	0.163425	0.216315	0.42069	0.999963	0.78309	0.95178	0.596286	0.666455	0.220991	0.999996	0.92531	0.932819
Ubiad1	1200002M06RIK	#N/A	#N/A	0.556897	0.534964	0.563712	0.591916	0.571658	0.563604	0.094335	0.999925	0.922549	0.731765	0.999936	0.999956	0.947782	0.996566	0.564452	0.526812	0.561151	0.588959	0.0896329	0.570004	0.526881	0.999996	0.856548	0.78559	0.96918	0.999939	0.95684	0.958875	0.989349	0.979048	0.185263	0.999967	0.999993	0.999951	0.172779	0.968338	0.954892	0.999963	0.999992	0.999961	0.325862	0.307867	0.31889	0.999996	0.817341	0.932819
Dram1	1200002N14RIK	#N/A	#N/A	0.47851	0.0400032	0.978105	0.166067	0.487172	0.472013	0.170147	0.999925	0.529546	0.999944	0.999936	0.999956	0.943773	0.996566	0.48909	0.000482977	0.0041405	0.952295	0.422251	0.413136	0.940568	0.999996	0.0227443	0.0713926	0.999974	0.999939	0.946726	0.999915	0.992084	0.329567	0.0619128	0.999967	0.947682	0.999951	0.931961	0.00232706	0.918587	0.999963	0.175003	0.999961	0.33324	0.0609534	0.992307	0.999996	0.544661	0.999996
Jkamp	1200003C05RIK	#N/A	#N/A	0.938734	0.866046	0.0488887	0.73174	0.274464	0.698359	0.387928	0.999925	0.992906	0.165309	0.999936	0.999956	0.973675	0.996566	0.39243	0.855071	0.438086	0.835145	0.066409	0.763514	0.400904	0.999996	0.973609	0.717428	0.999974	0.999939	0.971638	0.951553	0.370349	0.846367	0.643437	0.999967	0.999993	0.999951	0.0637454	0.932633	0.650489	0.999963	0.999992	0.960042	0.482838	0.739072	0.471413	0.999996	0.948274	0.960815
Zfp869	1200003I07RIK	#N/A	#N/A	0.814474	0.0517434	0.248819	0.49323	0.593622	0.0826784	0.964905	0.999925	0.594333	0.466519	0.999936	0.999956	0.838755	0.999982	0.848959	0.221401	0.191194	0.543363	0.646135	0.0370639	0.962113	0.999996	0.693656	0.506783	0.963213	0.999939	0.938581	0.999915	0.467003	0.82848	0.541878	0.999967	0.999993	0.999951	0.616657	0.479948	0.665018	0.999963	0.855813	0.960042	0.861678	0.0402428	0.671629	0.999996	0.448608	0.960815
Mfsd1	1200003O06RIK	#N/A	#N/A	0.91848	0.561488	0.309417	0.347827	0.799514	0.995049	0.313533	0.999925	0.925135	0.528562	0.999936	0.999956	0.999914	0.996566	0.645112	0.507766	0.567409	0.186796	0.545191	0.224709	0.589494	0.999996	0.853717	0.789104	0.946978	0.999939	0.938581	0.964674	0.806855	0.693258	0.961349	0.999967	0.962065	0.999951	0.482887	0.221128	0.598971	0.999963	0.787422	0.960042	0.913285	0.673678	0.17198	0.999996	0.92531	0.932819
Slc46a3	1200006F02RIK	#N/A	#N/A	0.527944	0.696062	0.640373	0.613639	0.419475	0.126381	0.179987	0.999925	0.962967	0.79419	0.999936	0.999956	0.892676	0.996566	0.92748	0.149308	0.112037	0.0412877	0.946021	0.668859	0.183267	0.999996	0.622224	0.399266	0.946978	0.999939	0.971638	0.949273	0.342617	0.20573	0.22459	0.999967	0.947682	0.999951	0.988526	0.252585	0.0456289	0.999963	0.805638	0.943671	0.89461	0.391906	0.528331	0.999996	0.82743	0.960815
Pnpla8	1200006O19RIK	#N/A	#N/A	0.13335	0.963119	0.027012	0.957599	0.405992	0.928003	0.5604	0.999925	0.999976	0.108894	0.999936	0.999956	0.999914	0.996566	0.921758	0.452191	0.434667	0.751416	0.572725	0.47769	0.848232	0.999996	0.826794	0.713707	0.984983	0.999939	0.953346	0.999589	0.0707409	0.912305	0.609016	0.999967	0.999993	0.999951	0.72407	0.275596	0.924259	0.999963	0.805638	0.999961	0.663863	0.977848	0.738867	0.999996	0.999976	0.975416
Ergic1	1200007D18RIK	#N/A	#N/A	0.352282	0.590011	6.55167e-05	0.539831	0.8135	0.477211	0.223277	0.999925	0.932283	0.00111678	0.999936	0.999956	0.946933	0.996566	0.798577	0.391764	0.790931	0.894516	0.717124	0.806899	0.68072	0.999996	0.782473	0.907695	0.999974	0.999939	0.982117	0.973317	0.436019	0.907325	0.226234	0.999967	0.999993	0.999951	0.947226	0.704347	0.863282	0.999963	0.906851	0.999961	0.607114	0.361862	0.650127	0.999996	0.817341	0.960815
Ergic2	1200009B18RIK	#N/A	#N/A	0.195807	0.396452	0.00517326	0.611916	0.117111	0.93747	0.341842	0.999925	0.877294	0.032267	0.999936	0.999956	0.999914	0.996566	0.0891306	0.23981	0.109071	0.574406	0.311525	0.760655	0.32637	0.999996	0.711565	0.393583	0.964899	0.999939	0.971638	0.949273	0.843848	0.596598	0.321886	0.999967	0.961605	0.999951	0.637567	0.333655	0.315578	0.999963	0.805638	0.950269	0.0499524	0.506939	0.747688	0.999996	0.900233	0.97689
Eif3k	1200009C21RIK	#N/A	#N/A	0.371868	0.390824	0.947131	0.390445	0.967732	0.0877622	0.0988963	0.999925	0.874724	0.995814	0.999936	0.999956	0.839503	0.996566	0.668603	0.643594	0.627026	0.188453	0.631556	0.167826	0.177482	0.999996	0.907238	0.82731	0.946978	0.999939	0.938581	0.949273	0.51411	0.0821238	0.567045	0.999967	0.947682	0.999951	0.969221	0.177039	0.97928	0.999963	0.775838	0.999961	0.548221	0.53625	0.0870588	0.999996	0.916942	0.932819
Lrwd1	1200011O22RIK	#N/A	#N/A	0.657024	0.637199	0.638008	0.659526	0.654028	0.189513	0.663106	0.999925	0.951575	0.792178	0.999936	0.999956	0.907207	0.996566	0.663356	0.19286	0.672777	0.673428	0.646486	0.645702	0.648067	0.999996	0.66664	0.857452	0.984983	0.999939	0.971638	0.973317	0.997394	0.170461	0.996897	0.999967	0.947682	0.999951	0.985273	0.174287	0.977945	0.999963	0.775838	0.999961	0.568947	0.584442	0.575848	0.999996	0.92531	0.960815
Nuak2	1200013B22RIK	#N/A	#N/A	0.869217	0.313294	0.402053	0.651048	0.271311	0.778869	0.452205	0.999925	0.861222	0.604578	0.999936	0.999956	0.974002	0.996566	0.613586	0.56422	0.583036	0.681099	0.376289	0.17286	0.459893	0.999996	0.862503	0.797874	0.984983	0.999939	0.938581	0.958875	0.505581	0.364136	0.39727	0.999967	0.947682	0.999951	0.760094	0.132416	0.364888	0.999963	0.762508	0.950269	0.381535	0.61088	0.833909	0.999996	0.92531	0.999996
Rsrc1	1200013F24RIK	#N/A	#N/A	0.98969	0.454447	0.42442	0.455333	0.453897	0.916391	0.945382	0.999925	0.911356	0.625799	0.999936	0.999956	0.999914	0.999982	0.99271	0.526341	0.15482	0.147477	0.470671	0.98721	0.492807	0.999996	0.856548	0.456691	0.946978	0.999939	0.999994	0.958875	0.637533	0.585723	0.663981	0.999967	0.961605	0.999951	0.656897	0.68553	0.190298	0.999963	0.903977	0.950269	0.54975	0.612808	0.522708	0.999996	0.92531	0.960815
Naa60	1200013P24RIK	#N/A	#N/A	0.442415	0.39168	0.282504	0.721887	0.407499	0.257089	0.75107	0.999925	0.874724	0.503091	0.999936	0.999956	0.907207	0.996566	0.535167	0.605045	0.0688417	0.525423	0.619938	0.589812	0.527381	0.999996	0.886782	0.311691	0.963213	0.999939	0.959087	0.958875	0.967818	0.197096	0.65737	0.999967	0.947682	0.999951	0.580174	0.600573	0.53037	0.999963	0.903977	0.960042	0.238277	0.83146	0.976727	0.999996	0.989353	0.999996
Ncbp3	1200014J11RIK	#N/A	#N/A	0.303393	0.900665	0.391612	0.511453	0.503043	0.731865	0.272537	0.999925	0.999976	0.595838	0.999936	0.999956	0.973675	0.996566	0.883875	0.582868	0.349653	0.827464	0.88692	0.471842	0.89197	0.999996	0.873531	0.644608	0.999974	0.999939	0.953346	0.999915	0.13538	0.672781	0.123768	0.999967	0.961605	0.999951	0.997966	0.406138	0.956742	0.999963	0.807921	0.999961	0.828387	0.897094	0.790269	0.999996	0.999976	0.99103
Klc4	1200014P03RIK	#N/A	#N/A	0.504564	0.979997	0.999212	0.779601	0.494357	0.175764	0.960542	0.999925	0.999976	0.999944	0.999936	0.999956	0.907207	0.999982	0.573731	0.471323	0.0379849	0.327303	0.514813	0.626167	0.205257	0.999996	0.833783	0.232837	0.946978	0.999939	0.970749	0.949273	0.990678	0.32189	0.868329	0.999967	0.947682	0.999951	0.953347	0.877929	0.151557	0.999963	0.999714	0.950269	0.359557	0.36194	0.821566	0.999996	0.817341	0.999996
Tprgl	1200015A19RIK	#N/A	#N/A	0.446423	0.374412	0.0187276	0.50697	0.111212	0.105146	0.132861	0.999925	0.867212	0.0841782	0.999936	0.999956	0.874503	0.996566	0.300344	0.251714	0.247226	0.353636	0.255531	0.290664	0.235412	0.999996	0.729272	0.565721	0.946978	0.999939	0.938581	0.949273	0.17091	0.145877	0.61125	0.999967	0.947682	0.999951	0.28439	0.277886	0.297197	0.999963	0.805638	0.950269	0.435809	0.489834	0.0581941	0.999996	0.887152	0.932819
Rmdn3	1200015F23RIK	#N/A	#N/A	0.769232	0.0418901	0.167427	0.779646	0.375907	0.073011	0.960615	0.999925	0.535424	0.369825	0.999936	0.999956	0.824894	0.999982	0.52208	0.7373	0.0897972	0.647502	0.985439	0.542233	0.909239	0.999996	0.932672	0.35822	0.984983	0.999939	0.953346	0.999915	0.354834	0.0059245	0.855189	0.999967	0.622489	0.999951	0.574515	0.423294	0.626383	0.999963	0.813064	0.960042	0.704417	0.866729	0.83408	0.999996	0.999976	0.999996
Swt1	1200016B10RIK	#N/A	#N/A	0.312502	0.117091	0.135339	0.615278	0.465782	0.444153	0.749806	0.999925	0.744224	0.325073	0.999936	0.999956	0.933572	0.996566	0.227264	0.573487	0.705006	0.270498	0.495048	0.735055	0.828496	0.999996	0.867785	0.874282	0.946978	0.999939	0.971638	0.993175	0.857128	0.149186	0.907483	0.999967	0.947682	0.999951	0.71984	0.879945	0.379276	0.999963	0.999992	0.950269	0.171931	0.507798	0.511126	0.999996	0.901236	0.960815
Scyl3	1200016D23RIK	#N/A	#N/A	0.546325	0.541536	0.0300035	0.0708789	0.51895	0.506017	0.0616905	0.999925	0.922549	0.117219	0.999936	0.999956	0.9475	0.996566	0.742279	0.317759	0.340187	0.326632	0.331289	0.101888	0.335361	0.999996	0.76334	0.639597	0.946978	0.999939	0.938581	0.949273	0.580677	0.471058	0.379544	0.999967	0.961605	0.999951	0.452049	0.134068	0.991692	0.999963	0.76749	0.999961	0.536688	0.527869	0.0750844	0.999996	0.914792	0.932819
Cluh	1300001I01RIK	#N/A	#N/A	0.646252	0.320656	0.0925305	0.700343	0.901107	0.564819	0.637651	0.999925	0.861222	0.253423	0.999936	0.999956	0.947799	0.996566	0.804095	0.655025	0.389725	0.583581	0.365046	0.972966	0.671749	0.999996	0.910837	0.671873	0.968441	0.999939	0.999994	0.973317	0.834322	0.332124	0.956957	0.999967	0.947682	0.999951	0.431803	0.777359	0.931757	0.999963	0.945701	0.999961	0.634047	0.729376	0.486581	0.999996	0.944203	0.960815
Errfi1	1300002F13RIK	#N/A	#N/A	0.0915484	0.804504	0.000259447	0.099252	0.635371	0.0847894	0.272072	0.999925	0.971537	0.00335708	0.999936	0.999956	0.839503	0.996566	0.0916227	0.3995	0.0268607	0.806718	0.759032	0.315777	0.00765225	0.999996	0.789459	0.196138	0.994708	0.999939	0.938581	0.732458	0.408084	0.318149	0.700954	0.999967	0.947682	0.999951	0.376176	0.917522	0.0664685	0.999963	0.999992	0.950269	0.117509	0.149839	0.0519629	0.999996	0.72355	0.932819
R3hdm2	1300003K24RIK	#N/A	#N/A	0.555317	0.893934	0.0190398	0.70208	0.441661	0.830335	0.604902	0.999925	0.999976	0.0852223	0.999936	0.999956	0.995236	0.996566	0.328541	0.289844	0.256298	0.326471	0.287614	0.28752	0.299131	0.999996	0.754072	0.576909	0.946978	0.999939	0.938581	0.949273	0.895203	0.800999	0.921681	0.999967	0.999993	0.999951	0.314725	0.296089	0.319638	0.999963	0.805638	0.950269	0.360135	0.956094	0.542442	0.999996	0.999976	0.960815
Josd1	1300006C06RIK	#N/A	#N/A	0.230008	0.88975	4.40503e-09	0.172199	0.628918	0.412577	0.562415	0.999925	0.999976	3.193e-07	0.999936	0.999956	0.915556	0.996566	0.902007	0.128305	5.82109e-05	0.594086	0.106434	0.586457	0.136134	0.999996	0.591095	0.00541729	0.969409	0.999939	0.959087	0.949273	0.604957	0.627175	0.568864	0.999967	0.961605	0.999951	0.263996	0.13147	0.4665	0.999963	0.762169	0.960042	0.249997	0.508425	0.185933	0.999996	0.901573	0.932819
Stt3b	1300006C19RIK	#N/A	#N/A	0.398558	0.825035	0.395405	0.225375	0.953051	0.0391813	0.409701	0.999925	0.980217	0.598296	0.999936	0.999956	0.718003	0.996566	0.649593	0.0547556	0.245359	0.146939	0.754703	0.989512	0.792391	0.999996	0.438162	0.563609	0.946978	0.999939	0.999994	0.98093	0.489606	0.106218	0.726484	0.999967	0.947682	0.999951	0.921337	0.185168	0.405891	0.999963	0.775838	0.950269	0.587541	0.170326	0.228103	0.999996	0.740575	0.932819
Raver1	1300006N24RIK	#N/A	#N/A	0.404007	0.392557	0.968783	0.388902	0.994435	0.0952542	0.991131	0.999925	0.875061	0.999944	0.999936	0.999956	0.851666	0.999982	0.736022	0.72257	0.089515	0.301804	0.716133	0.729731	0.0840807	0.999996	0.932672	0.357896	0.946978	0.999939	0.971638	0.949273	0.543873	0.0739276	0.532718	0.999967	0.947682	0.999951	0.98671	0.995215	0.0926113	0.999963	0.999992	0.950269	0.570859	0.570995	0.556657	0.999996	0.92531	0.960815
Tmem183a	1300007B12RIK	#N/A	#N/A	0.646784	0.577951	0.53873	0.687944	0.759172	0.541912	0.43589	0.999925	0.931467	0.717447	0.999936	0.999956	0.9475	0.996566	0.68607	0.298646	0.277047	0.772202	0.56954	0.823497	0.32171	0.999996	0.758192	0.596261	0.985346	0.999939	0.988462	0.949273	0.623863	0.972321	0.806825	0.999967	0.999993	0.999951	0.506256	0.572954	0.627671	0.999963	0.898267	0.960042	0.905504	0.367834	0.361643	0.999996	0.817341	0.932819
Shroom1	1300007L22RIK	#N/A	#N/A	0.061849	0.753527	1.94617e-05	0.803227	0.239334	0.383922	0.602653	0.999925	0.962967	0.000421161	0.999936	0.999956	0.907207	0.996566	0.0596448	0.0213758	0.342152	0.611665	0.374686	0.193545	0.846918	0.999996	0.293368	0.641246	0.974795	0.999939	0.938581	0.998751	0.563409	0.656118	0.828616	0.999967	0.961605	0.999951	0.46484	0.0168812	0.823811	0.999963	0.417334	0.999961	0.0621746	0.454025	0.625865	0.999996	0.857176	0.960815
Tspan33	1300010A20RIK	#N/A	#N/A	0.14909	0.534595	5.62967e-07	0.955934	0.958925	0.904934	0.0763772	0.999925	0.922549	2.3613e-05	0.999936	0.999956	0.999914	0.996566	0.204116	0.737157	0.119381	0.573174	0.917891	0.408988	0.249122	0.999996	0.932672	0.410547	0.964899	0.999939	0.944577	0.949273	0.265679	0.580622	0.174137	0.999967	0.961605	0.999951	0.392554	0.399286	0.661903	0.999963	0.807921	0.960042	0.354708	0.738987	0.252769	0.999996	0.948274	0.932819
Yipf2	1300010K09RIK	#N/A	#N/A	0.681151	0.955748	0.850703	0.283488	0.0759245	0.673697	0.701955	0.999925	0.999976	0.930056	0.999936	0.999956	0.973675	0.996566	0.586583	0.476374	0.945679	0.998299	0.3641	0.737224	0.135454	0.999996	0.836347	0.999954	0.999974	0.999939	0.971638	0.949273	0.0808172	0.695505	0.567367	0.999967	0.962584	0.999951	0.746251	0.361708	0.192756	0.999963	0.805638	0.950269	0.386616	0.81995	0.36819	0.999996	0.983505	0.932819
Ugt2b1	1300012D20RIK	#N/A	#N/A	0.0849558	0.329408	1.69228e-13	0.118382	0.579825	0.751561	0.613361	0.999925	0.861222	2.80768e-11	0.999936	0.999956	0.973675	0.996566	0.400262	0.252423	0.356163	0.880384	0.928119	0.0367507	0.0830163	0.999996	0.729272	0.64733	0.999974	0.999939	0.938581	0.949273	0.146966	0.667462	0.48563	0.999967	0.961605	0.999951	0.66661	0.0718257	0.279816	0.999963	0.707439	0.950269	0.356859	0.32296	0.119066	0.999996	0.817341	0.932819
Ero1b	1300013B24RIK	#N/A	#N/A	0.505398	0.826895	0.00276372	0.864393	0.335044	0.610685	0.229789	0.999925	0.981307	0.0201898	0.999936	0.999956	0.963112	0.996566	0.822331	0.640577	0.0402641	0.781686	0.940288	0.857638	0.451973	0.999996	0.90591	0.240297	0.987318	0.999939	0.999994	0.958875	0.302999	0.642483	0.381757	0.999967	0.961605	0.999951	0.924304	0.682093	0.761839	0.999963	0.903977	0.984958	0.811832	0.818778	0.416293	0.999996	0.983192	0.933873
Cyp2d40	1300013D18RIK	#N/A	#N/A	0.461839	0.0400015	3.23695e-05	0.70575	0.927335	0.0895673	0.379187	0.999925	0.529546	0.000627717	0.999936	0.999956	0.839503	0.996566	0.773897	0.285745	0.00886633	0.475402	0.775568	0.0248059	0.689579	0.999996	0.751982	0.108696	0.963213	0.999939	0.902034	0.973317	0.636184	0.824951	0.772241	0.999967	0.999993	0.999951	0.999037	0.489852	0.861205	0.999963	0.860263	0.999961	0.520935	0.00124096	0.21897	0.999996	0.0674643	0.932819
Slc47a1	1300013J15RIK	#N/A	#N/A	0.544812	0.0101928	3.02737e-09	0.824968	0.150081	0.38444	0.155656	0.999925	0.285016	2.35441e-07	0.999936	0.999956	0.907207	0.996566	0.79152	0.452664	0.0148487	0.609729	0.722836	0.0438366	0.709675	0.999996	0.827114	0.142494	0.972764	0.999939	0.938581	0.973317	0.207911	0.0372376	0.307207	0.999967	0.947682	0.999951	0.960127	0.131178	0.938907	0.999963	0.761667	0.999961	0.487327	0.147028	0.325301	0.999996	0.722311	0.932819
Pxdc1	1300014I06RIK	#N/A	#N/A	0.0632361	0.0260592	0.0610082	0.713352	0.135213	0.951122	0.747014	0.999925	0.438194	0.192351	0.999936	0.999956	0.999914	0.996566	0.331607	0.358463	0.10061	0.871794	0.133033	0.471194	0.506708	0.999996	0.767956	0.379754	0.999974	0.999939	0.953346	0.958875	0.786736	0.11199	0.975042	0.999967	0.947682	0.999951	0.750348	0.907541	0.633552	0.999963	0.999992	0.960042	0.0255563	0.125225	0.626866	0.999996	0.686134	0.960815
Inhca	1300017J02RIK	#N/A	#N/A	0.885804	0.429776	0.032474	0.631561	0.85504	0.373538	0.242381	0.999925	0.898124	0.124079	0.999936	0.999956	0.907207	0.996566	0.775122	0.883642	0.086051	0.519672	0.992608	0.8115	0.394111	0.999996	0.989981	0.351261	0.963213	0.999939	0.983229	0.951066	0.974739	0.183869	0.572077	0.999967	0.947682	0.999951	0.844574	0.78507	0.881022	0.999963	0.948742	0.999961	0.837758	0.94895	0.304918	0.999996	0.999976	0.932819
Tha1	1300017K07RIK	#N/A	#N/A	0.985392	0.36851	0.0884973	0.0834418	0.370037	0.964144	0.375814	0.999925	0.863076	0.246722	0.999936	0.999956	0.999914	0.996566	0.721933	0.736986	0.753939	0.290731	0.709283	0.677283	0.299956	0.999996	0.932672	0.894714	0.946978	0.999939	0.971638	0.949273	0.334148	0.346912	0.335242	0.999967	0.947682	0.999951	0.990462	0.954797	0.988486	0.999963	0.999992	0.999961	0.611148	0.599844	0.152839	0.999996	0.92531	0.932819
Cmtr1	1300018I05RIK	#N/A	#N/A	0.286854	0.0721379	0.14859	0.0611041	0.281949	0.491535	0.479838	0.999925	0.668682	0.34476	0.999936	0.999956	0.9475	0.996566	0.889087	0.896462	0.54334	0.0274951	0.89783	0.0122829	0.757024	0.999996	0.995432	0.781968	0.946978	0.999939	0.841166	0.973317	0.13167	0.408297	0.38425	0.999967	0.947682	0.999951	0.848435	0.0623416	0.169917	0.999963	0.689226	0.950269	0.99391	0.0984687	0.0869746	0.999996	0.625423	0.932819
Selenoo	1300018J18RIK	#N/A	#N/A	0.390521	0.668889	0.0661466	0.952522	0.92167	0.0334054	0.0692886	0.999925	0.962967	0.204029	0.999936	0.999956	0.694721	0.996566	0.233132	0.0230779	0.0435656	0.320114	0.58427	0.915771	0.584065	0.999996	0.307129	0.24901	0.946978	0.999939	0.999994	0.964674	0.561541	0.289571	0.252908	0.999967	0.947682	0.999951	0.324246	0.17074	0.796057	0.999963	0.775838	0.997375	0.512431	0.034856	0.133572	0.999996	0.416875	0.932819
Dhdh	1300018L09RIK	#N/A	#N/A	0.481365	0.357845	0.957544	0.944808	0.390972	0.288675	0.910575	0.999925	0.861222	0.999944	0.999936	0.999956	0.907207	0.999982	0.920386	0.324857	0.111971	0.488072	0.417237	0.367165	0.472625	0.999996	0.763416	0.399266	0.963213	0.999939	0.938581	0.958875	0.915694	0.187719	0.901953	0.999967	0.947682	0.999951	0.699488	0.312218	0.447666	0.999963	0.805638	0.960042	0.263401	0.916126	0.975008	0.999996	0.999976	0.999996
Eif4e3	1300018P11RIK	#N/A	#N/A	0.0388166	0.0441658	0.165106	0.0610822	0.562186	0.634693	0.762436	0.999925	0.544129	0.366325	0.999936	0.999956	0.973618	0.996566	0.0719817	0.0775395	0.359356	0.266307	0.59695	0.525487	0.181352	0.999996	0.489772	0.650516	0.946978	0.999939	0.953346	0.949273	0.0934475	0.113182	0.163113	0.999967	0.947682	0.999951	0.00647437	0.0131808	0.587095	0.999963	0.382911	0.960042	0.238189	0.225202	0.219511	0.999996	0.776655	0.932819
Ngdn	1500001L15RIK	#N/A	#N/A	0.63651	0.433824	0.461168	0.256306	0.100483	0.162853	0.309191	0.999925	0.898862	0.659464	0.999936	0.999956	0.907207	0.996566	0.951269	0.626247	0.789417	0.194176	0.247565	0.926714	0.497497	0.999996	0.899147	0.907257	0.946978	0.999939	0.999994	0.958875	0.143591	0.134756	0.93185	0.999967	0.947682	0.999951	0.42578	0.795804	0.67867	0.999963	0.95504	0.960042	0.404617	0.659992	0.142291	0.999996	0.92531	0.932819
Tamm41	1500001M20RIK	#N/A	#N/A	0.6342	0.88484	0.272203	0.63799	0.868363	0.884759	0.878716	0.999925	0.999976	0.492075	0.999936	0.999956	0.999914	0.999982	0.851851	0.840218	0.212436	0.36904	0.59062	0.596822	0.588116	0.999996	0.965533	0.530374	0.946978	0.999939	0.959283	0.964674	0.682255	0.999947	0.690876	0.999967	0.999993	0.999951	0.608367	0.605506	0.31305	0.999963	0.903977	0.950269	0.80682	0.819662	0.802078	0.999996	0.983505	0.995426
Wdr53	1500002B03RIK	#N/A	#N/A	0.537915	0.540726	0.997815	0.227199	0.541709	0.540563	0.221005	0.999925	0.922549	0.999944	0.999936	0.999956	0.9475	0.996566	0.467886	0.470842	0.155364	0.9986	0.469928	0.468798	0.00619434	0.999996	0.833603	0.457755	0.999974	0.999939	0.953346	0.723529	0.996971	0.99987	0.991194	0.999967	0.999993	0.999951	0.997897	0.997897	0.0346089	0.999963	0.999992	0.844412	0.357231	0.358201	0.0761181	0.999996	0.817341	0.932819
C1galt1c1	1500002I11RIK	#N/A	#N/A	0.999668	0.0426927	0.251244	0.999927	0.274631	0.274502	0.301564	0.999925	0.538633	0.468827	0.999936	0.999956	0.907207	0.996566	0.958747	0.301617	0.29097	0.32062	0.296387	0.0367075	0.965526	0.999996	0.759127	0.608171	0.946978	0.999939	0.938581	0.999915	0.319488	0.369656	0.346309	0.999967	0.947682	0.999951	0.362171	0.309153	0.383007	0.999963	0.805638	0.950269	0.51826	0.0734003	0.541256	0.999996	0.57276	0.960815
Med28	1500003D12RIK	#N/A	#N/A	0.506041	0.546118	0.454492	0.710041	0.142778	0.67365	0.78344	0.999925	0.922549	0.654433	0.999936	0.999956	0.973675	0.996762	0.474674	0.741299	0.656036	0.614766	0.88601	0.459004	0.687596	0.999996	0.932672	0.846292	0.976814	0.999939	0.953346	0.973317	0.199647	0.910801	0.693567	0.999967	0.999993	0.999951	0.719907	0.796206	0.572461	0.999963	0.955089	0.960042	0.486443	0.387366	0.934014	0.999996	0.825267	0.999996
Chp1	1500003O03RIK	#N/A	#N/A	0.111786	0.453302	0.38643	0.396426	0.64022	0.19665	0.965576	0.999925	0.911202	0.590964	0.999936	0.999956	0.907207	0.999982	0.234819	0.772626	0.337727	0.359922	0.455643	0.277339	0.220925	0.999996	0.932758	0.637862	0.946978	0.999939	0.938581	0.949273	0.176073	0.711974	0.55259	0.999967	0.969647	0.999951	0.3236	0.479844	0.275988	0.999963	0.855813	0.950269	0.396629	0.139365	0.54981	0.999996	0.709182	0.960815
Emc9	1500005A01RIK	#N/A	#N/A	0.758778	0.410523	0.453992	0.953123	0.535821	0.75055	0.227429	0.999925	0.88711	0.653839	0.999936	0.999956	0.973675	0.996566	0.267122	0.259602	0.205079	0.360048	0.349419	0.361454	0.257175	0.999996	0.736967	0.52346	0.946978	0.999939	0.938581	0.949273	0.816575	0.706924	0.350357	0.999967	0.967454	0.999951	0.30921	0.310447	0.308479	0.999963	0.805638	0.950269	0.537283	0.447916	0.441448	0.999996	0.851884	0.948714
Ctc1	1500010J02RIK	#N/A	#N/A	0.674705	0.257611	0.049502	0.26416	0.685796	0.681855	0.255038	0.999925	0.861222	0.166703	0.999936	0.999956	0.973675	0.996566	0.694151	0.276632	0.0165374	0.748202	0.704609	0.725597	0.732573	0.999996	0.749075	0.150022	0.984983	0.999939	0.971638	0.973317	0.629066	0.667625	0.19298	0.999967	0.961605	0.999951	0.658909	0.669785	0.704716	0.999963	0.903977	0.96351	0.988769	0.162971	0.983557	0.999996	0.740575	0.999996
Eif1b	1500010M16RIK	#N/A	#N/A	0.214309	0.683496	0.0268071	0.347805	0.956182	0.936915	0.562584	0.999925	0.962967	0.108401	0.999936	0.999956	0.999914	0.996566	0.327587	0.796367	0.424203	0.725819	0.71754	0.911646	0.449094	0.999996	0.939498	0.704193	0.984983	0.999939	0.999994	0.958875	0.390335	0.747173	0.319734	0.999967	0.985452	0.999951	0.644379	0.913049	0.414657	0.999963	0.999992	0.950944	0.374267	0.80561	0.784995	0.999996	0.97629	0.990602
Fam216a	1500011H22RIK	#N/A	#N/A	0.29128	0.979556	0.942738	0.292823	0.309204	0.0440901	0.285802	0.999925	0.999976	0.994136	0.999936	0.999956	0.739616	0.996566	0.0675907	0.0738251	0.482411	0.0644961	0.550078	0.549703	0.527479	0.999996	0.47932	0.752388	0.946978	0.999939	0.953346	0.958875	0.979409	0.180563	0.991722	0.999967	0.947682	0.999951	0.324927	0.341297	0.329267	0.999963	0.805638	0.950269	0.126132	0.132321	0.118215	0.999996	0.694556	0.932819
Ssu72	1500011L16RIK	#N/A	#N/A	0.657679	0.304138	2.62735e-06	0.962129	0.865604	0.402932	0.603684	0.999925	0.861222	8.17326e-05	0.999936	0.999956	0.911052	0.996566	0.880213	0.69796	0.00420036	0.0210584	0.89264	0.852965	0.0624327	0.999996	0.929037	0.071652	0.946978	0.999939	0.997844	0.949273	0.728993	0.296304	0.748297	0.999967	0.947682	0.999951	0.992829	0.742494	0.0228254	0.999963	0.927578	0.795409	0.777744	0.840854	0.627786	0.999996	0.994155	0.960815
Zfas1	1500012F01RIK	#N/A	#N/A	0.178343	0.560233	1.05833e-06	0.693921	0.432441	0.503255	0.392015	0.999925	0.924353	3.93111e-05	0.999936	0.999956	0.9475	0.996566	0.597525	0.204841	0.0462263	0.738116	0.0345026	0.229121	0.979576	0.999996	0.679736	0.25679	0.984983	0.999939	0.938581	0.999915	0.680143	0.37396	0.374273	0.999967	0.947682	0.999951	0.118307	0.148684	0.853611	0.999963	0.775838	0.999961	0.152171	0.951952	0.748723	0.999996	0.999976	0.977017
Rpl7l1	1500016H10RIK	#N/A	#N/A	0.739878	0.100419	0.00535223	0.667803	0.826541	0.583309	0.0412057	0.999925	0.732474	0.0331341	0.999936	0.999956	0.95081	0.996566	0.525404	0.620107	0.124622	0.803107	0.596957	0.567999	0.0726677	0.999996	0.896367	0.419038	0.992976	0.999939	0.95684	0.949273	0.717769	0.156594	0.109519	0.999967	0.947682	0.999951	0.464124	0.961739	0.197721	0.999963	0.999992	0.950269	0.931775	0.398195	0.214455	0.999996	0.82743	0.932819
Hspbp1	1500019G21RIK	#N/A	#N/A	0.602687	0.695995	0.0410524	0.317918	0.319943	0.117746	0.936964	0.999925	0.962967	0.145951	0.999936	0.999956	0.882624	0.999982	0.684773	0.42444	0.317829	0.447293	0.358554	0.803915	0.85355	0.999996	0.806011	0.623466	0.963213	0.999939	0.980787	0.999915	0.721602	0.153498	0.494132	0.999967	0.947682	0.999951	0.735864	0.718042	0.70625	0.999963	0.914077	0.964313	0.317399	0.426909	0.472825	0.999996	0.834863	0.960815
Rnaseh2c	1500026D16RIK	#N/A	#N/A	0.592202	0.752266	0.317246	0.339472	0.63953	0.518845	0.145931	0.999925	0.962967	0.535109	0.999936	0.999956	0.9475	0.996566	0.536174	0.604076	0.100341	0.124775	0.585299	0.124355	0.281296	0.999996	0.886125	0.379314	0.946978	0.999939	0.938581	0.949273	0.4356	0.79561	0.686794	0.999967	0.999993	0.999951	0.294177	0.0705326	0.663773	0.999963	0.706516	0.960042	0.965363	0.539133	0.131298	0.999996	0.916942	0.932819
Cep19	1500031L02RIK	#N/A	#N/A	0.542155	0.185838	0.165049	0.724323	0.228943	0.0820224	0.0571748	0.999925	0.820777	0.366325	0.999936	0.999956	0.837022	0.996566	0.131323	0.121102	0.0379283	0.423856	0.888916	0.205228	0.506038	0.999996	0.576447	0.232773	0.963213	0.999939	0.938581	0.958875	0.66568	0.75325	0.112466	0.999967	0.986679	0.999951	0.362359	0.844452	0.92815	0.999963	0.982051	0.999961	0.219302	0.0442053	0.278365	0.999996	0.474	0.932819
Ndufv3	1500032D16RIK	#N/A	#N/A	0.13389	0.79428	0.53203	0.40194	0.780262	0.770274	0.77384	0.999925	0.967668	0.714156	0.999936	0.999956	0.973675	0.996566	0.408971	0.358073	0.785276	0.408334	0.31042	0.720992	0.167518	0.999996	0.767956	0.904764	0.957681	0.999939	0.971638	0.949273	0.383849	0.982336	0.428838	0.999967	0.999993	0.999951	0.888694	0.357383	0.118539	0.999963	0.805638	0.950269	0.219905	0.700801	0.69968	0.999996	0.928719	0.961089
Smdt1	1500032L24RIK	#N/A	#N/A	0.776042	0.739421	0.185647	0.597064	0.974388	0.368478	0.926249	0.999925	0.962967	0.394367	0.999936	0.999956	0.907207	0.999982	0.810627	0.478736	0.478765	0.988603	0.93723	0.594472	0.650449	0.999996	0.83803	0.750307	0.999974	0.999939	0.959087	0.973317	0.846884	0.662526	0.6352	0.999967	0.961605	0.999951	0.901291	0.891142	0.718763	0.999963	0.999992	0.968338	0.836548	0.424516	0.775959	0.999996	0.83307	0.987549
Fam174c	1600002K03RIK	#N/A	#N/A	0.713467	0.861438	0.316149	0.337735	0.657117	0.457881	0.370113	0.999925	0.99193	0.534372	0.999936	0.999956	0.942152	0.996566	0.674115	0.360526	0.637442	0.328869	0.620047	0.986994	0.39728	0.999996	0.769017	0.835231	0.946978	0.999939	0.999994	0.951066	0.551331	0.674446	0.962533	0.999967	0.961605	0.999951	0.510039	0.501488	0.92372	0.999963	0.867959	0.999961	0.958841	0.539808	0.221675	0.999996	0.916942	0.932819
1600012H06Rik	1600012H06RIK	#N/A	#N/A	0.203241	0.982788	0.488801	0.979142	0.529116	0.546931	0.523343	0.999925	0.999976	0.682128	0.999936	0.999956	0.9475	0.996566	0.0581925	0.989192	0.510559	0.507684	0.989489	0.543762	0.986964	0.999996	0.999842	0.764813	0.963213	0.999939	0.953346	0.999915	0.636558	0.652864	0.658828	0.999967	0.961605	0.999951	0.165027	0.646274	0.632686	0.999963	0.903977	0.960042	0.201161	0.69125	0.649832	0.999996	0.92531	0.960815
Ttc23	1600012K10RIK	#N/A	#N/A	0.761158	0.709781	0.602584	0.708326	0.725139	0.253804	0.251696	0.999925	0.962967	0.764597	0.999936	0.999956	0.907207	0.996566	0.736714	0.239059	0.590435	0.242423	0.747525	0.684487	0.693263	0.999996	0.710797	0.802072	0.946978	0.999939	0.971638	0.973317	0.973933	0.304808	0.302606	0.999967	0.947682	0.999951	0.992144	0.281773	0.287811	0.999963	0.805638	0.950269	0.637617	0.575839	0.574251	0.999996	0.92531	0.960815
Mettl6	1600013P15RIK	#N/A	#N/A	0.566694	0.990391	0.247169	0.561606	0.564453	0.995392	0.562026	0.999925	0.999976	0.464709	0.999936	0.999956	0.999914	0.996566	0.992876	0.993998	0.259289	0.996323	0.995488	0.989096	0.995832	0.999996	0.999842	0.579944	0.999974	0.999939	0.999994	0.999915	0.413753	0.989807	0.40932	0.999967	0.999993	0.999951	0.991827	0.988126	0.99449	0.999963	0.999992	0.999961	0.998169	0.996564	0.999656	0.999996	0.999976	0.999996
1600014C10Rik	1600014C10RIK	#N/A	#N/A	0.450393	0.391935	0.0596498	0.979731	0.351747	0.594978	0.339093	0.999925	0.874724	0.189509	0.999936	0.999956	0.953651	0.996566	0.554616	0.995988	0.118475	0.712524	0.693093	0.722132	0.152107	0.999996	0.999842	0.409356	0.984983	0.999939	0.971638	0.949273	0.313243	0.404696	0.572867	0.999967	0.947682	0.999951	0.531403	0.823058	0.25454	0.999963	0.969983	0.950269	0.876218	0.775893	0.396275	0.999996	0.962995	0.932819
Tmem33	1600019D15RIK	#N/A	#N/A	0.675667	0.0648902	0.0313148	0.858134	0.473548	0.0347937	0.0217794	0.999925	0.644243	0.121327	0.999936	0.999956	0.695536	0.996566	0.643375	0.42427	0.0447039	0.43826	0.833523	0.0120708	0.170967	0.999996	0.806006	0.251912	0.963213	0.999939	0.841166	0.949273	0.333229	0.802302	0.0701514	0.999967	0.999993	0.999951	0.645301	0.219171	0.676393	0.999963	0.78632	0.960042	0.855387	0.0229369	0.132713	0.999996	0.346514	0.932819
Hacl1	1600020H07RIK	#N/A	#N/A	0.333973	0.00790452	0.10538	0.749596	0.612467	0.192189	0.651071	0.999925	0.244885	0.276933	0.999936	0.999956	0.907207	0.996566	0.474104	0.0365139	0.126908	0.314124	0.654967	0.280302	0.267408	0.999996	0.373982	0.422268	0.946978	0.999939	0.938581	0.949273	0.71414	0.250405	0.545006	0.999967	0.947682	0.999951	0.864999	0.50279	0.192639	0.999963	0.869345	0.950269	0.351162	0.0164138	0.932043	0.999996	0.298771	0.999996
Zfp654	1600021C16RIK	#N/A	#N/A	0.997755	0.981302	0.971009	0.185795	0.160798	0.169976	0.987969	0.999925	0.999976	0.999944	0.999936	0.999956	0.907207	0.999982	0.545924	0.0854636	0.525954	0.584624	0.574353	0.551937	0.57145	0.999996	0.509954	0.773866	0.968709	0.999939	0.953346	0.962563	0.32419	0.343572	0.358505	0.999967	0.947682	0.999951	0.979295	0.163665	0.990554	0.999963	0.775838	0.999961	0.326067	0.327809	0.348001	0.999996	0.817341	0.932819
Wfdc2	1600023A02RIK	#N/A	#N/A	1.10853e-05	0.00357014	1.03685e-05	0.251949	0.40405	0.00206094	0.898101	0.0118233	0.158659	0.000253807	0.999936	0.999956	0.260797	0.999982	0.0546076	0.61015	0.800516	0.633772	0.430324	0.678346	0.998765	0.999996	0.888933	0.912049	0.983994	0.999939	0.971638	0.999915	0.00271752	7.40465e-05	0.30772	0.999967	0.050217	0.999951	0.529756	0.623064	0.798858	0.999963	0.903977	0.99844	0.00146496	0.896441	0.519948	0.659402	0.999976	0.960815
Coa5	1700001A24RIK	#N/A	#N/A	0.598287	0.837046	0.642641	0.0945026	0.00897369	0.488156	0.378796	0.999925	0.98441	0.796078	0.999936	0.999956	0.9475	0.996566	0.117946	0.323154	0.242554	0.628305	0.946779	0.529292	0.276638	0.999996	0.763416	0.560479	0.982463	0.999939	0.953346	0.949273	0.018969	0.484667	0.0561257	0.999967	0.961605	0.999951	0.360962	0.33144	0.344172	0.999963	0.805638	0.950269	0.164565	0.753286	0.598163	0.999996	0.951786	0.960815
1700001C19Rik	1700001C19RIK	#N/A	#N/A	0.244475	0.722054	0.00146348	0.406236	0.947623	0.00558429	0.944083	0.999925	0.962967	0.0125326	0.999936	0.999956	0.368096	0.999982	0.74547	0.000487421	0.0417717	0.888638	0.415725	0.652384	0.518935	0.999996	0.0227443	0.24441	0.999974	0.999939	0.971638	0.958875	0.43547	0.11447	0.568054	0.999967	0.947682	0.999951	0.750322	0.0122163	0.743598	0.999963	0.364826	0.98017	0.381991	0.0166165	0.544566	0.999996	0.299193	0.960815
Lrrc46	1700006D24RIK	#N/A	#N/A	0.759627	0.133833	0.75722	0.760713	0.75378	0.768462	0.36487	0.999925	0.771807	0.869237	0.999936	0.999956	0.973675	0.996566	0.76123	0.764423	0.373955	0.765642	0.766963	0.139451	0.375852	0.999996	0.932672	0.658014	0.984983	0.999939	0.938581	0.949472	0.65663	0.202118	0.663249	0.999967	0.947682	0.999951	0.674075	0.216604	0.678068	0.999963	0.78309	0.960042	0.995787	0.403967	0.409522	0.999996	0.82743	0.932819
Ccdc28a	1700009P13RIK	#N/A	#N/A	0.312382	0.313036	0.317207	0.314305	0.345841	0.321721	0.313527	0.999925	0.861222	0.535109	0.999936	0.999956	0.907207	0.996566	0.64743	0.813378	0.376575	0.0849514	0.676766	0.997332	0.0885567	0.999996	0.949153	0.66013	0.946978	0.999939	0.999994	0.949273	0.335407	0.324118	0.320728	0.999967	0.947682	0.999951	0.977179	0.866152	0.0233069	0.999963	0.993192	0.795409	0.542815	0.870734	0.988285	0.999996	0.999976	0.999996
Cfap126	1700009P17RIK	#N/A	#N/A	0.73861	0.0834392	0.00297251	0.0862546	0.298609	0.7067	0.715671	0.999925	0.704125	0.0214009	0.999936	0.999956	0.973675	0.996566	0.994787	0.121567	4.4679e-05	0.436122	0.435347	0.425878	0.124806	0.999996	0.576697	0.00463296	0.963213	0.999939	0.950236	0.949273	0.366	0.361335	0.362888	0.999967	0.947682	0.999951	0.572493	0.57226	0.570464	0.999963	0.898267	0.960042	0.594564	0.121742	0.126447	0.999996	0.685052	0.932819
Ascc2	1700011I11RIK	#N/A	#N/A	0.805141	0.710001	0.0587581	0.626807	0.559895	0.728777	0.789657	0.999925	0.962967	0.188117	0.999936	0.999956	0.973675	0.996762	0.352411	0.941279	0.78018	0.556941	0.589531	0.36275	0.768829	0.999996	0.999842	0.901697	0.963213	0.999939	0.938581	0.973317	0.558685	0.98579	0.876268	0.999967	0.999993	0.999951	0.195288	0.378505	0.790723	0.999963	0.807921	0.996495	0.81429	0.617971	0.601268	0.999996	0.92531	0.960815
Osgin1	1700012B18RIK	#N/A	#N/A	0.473853	0.658817	0.00835092	0.565624	0.1045	0.375183	0.852408	0.999925	0.960842	0.0460132	0.999936	0.999956	0.907207	0.999982	0.23788	0.371844	0.424708	0.136607	0.698762	0.60924	0.392157	0.999996	0.770045	0.704231	0.946978	0.999939	0.964162	0.950709	0.160385	0.420661	0.812251	0.999967	0.947682	0.999951	0.371571	0.423992	0.186093	0.999963	0.813064	0.950269	0.427734	0.701537	0.518242	0.999996	0.929281	0.960815
Pgp	1700012G19RIK	#N/A	#N/A	0.863671	0.700656	0.00558986	0.508749	0.921418	0.0605359	0.153321	0.999925	0.962967	0.0341521	0.999936	0.999956	0.800958	0.996566	0.977639	0.578727	0.137557	0.512526	0.922325	0.107205	0.18223	0.999996	0.870757	0.436278	0.963213	0.999939	0.938581	0.949273	0.812628	0.187375	0.492521	0.999967	0.947682	0.999951	0.920072	0.390127	0.579954	0.999963	0.807921	0.960042	0.964936	0.176349	0.21477	0.999996	0.740575	0.932819
Rbmxl2	1700012H05RIK	#N/A	#N/A	0.350861	0.344265	0.350722	0.347313	0.346144	0.124905	0.349422	0.999925	0.861222	0.560945	0.999936	0.999956	0.891689	0.996566	0.758522	0.767853	0.750455	0.75478	0.765458	0.0374493	0.751691	0.999996	0.932758	0.894146	0.984983	0.999939	0.938581	0.973317	0.197048	0.668935	0.196931	0.999967	0.961605	0.999951	0.679146	0.214753	0.667725	0.999963	0.782298	0.960042	0.994758	0.0919885	0.997656	0.999996	0.610524	0.999996
C8g	1700013L23RIK	#N/A	#N/A	0.550786	0.0926115	0.147549	0.24758	0.703136	0.991785	0.481357	0.999925	0.726449	0.342963	0.999936	0.999956	0.999914	0.996566	0.705397	0.781285	0.994539	0.814152	0.817427	0.152129	0.301804	0.999996	0.933649	0.999954	0.997708	0.999939	0.938581	0.949273	0.335864	0.102603	0.646435	0.999967	0.947682	0.999951	0.708582	0.295203	0.621601	0.999963	0.805638	0.960042	0.90137	0.329719	0.292035	0.999996	0.817341	0.932819
Mfsd2a	1700018O18RIK	#N/A	#N/A	0.77303	0.3645	0.80899	0.77294	0.586353	0.51827	0.659838	0.999925	0.861869	0.899582	0.999936	0.999956	0.9475	0.996566	0.436693	0.0729798	0.308221	0.0450508	0.906178	0.875859	0.0637398	0.999996	0.478889	0.616443	0.946978	0.999939	0.999994	0.949273	0.874538	0.870763	0.65466	0.999967	0.999993	0.999951	0.670032	0.210222	0.0193394	0.999963	0.778862	0.795409	0.487358	0.201982	0.898461	0.999996	0.750475	0.999996
Ift43	1700019E19RIK	#N/A	#N/A	0.367121	0.89458	0.530283	0.821883	0.546092	0.426345	0.592566	0.999925	0.999976	0.713222	0.999936	0.999956	0.92557	0.996566	0.527714	0.918501	0.797861	0.287829	0.340869	0.414079	0.165625	0.999996	0.999842	0.910397	0.946978	0.999939	0.946726	0.949273	0.33673	0.550408	0.624937	0.999967	0.961605	0.999951	0.285212	0.530609	0.104398	0.999963	0.883813	0.950269	0.814338	0.605686	0.809068	0.999996	0.92531	0.997626
Nat8f4	1700019G17RIK	#N/A	#N/A	0.850087	0.0394523	0.0279376	0.311082	0.568449	0.0166223	0.455368	0.999925	0.529546	0.111539	0.999936	0.999956	0.608342	0.996566	0.807653	0.00537416	0.786037	0.142558	0.905142	0.158499	0.851811	0.999996	0.122328	0.905184	0.946978	0.999939	0.938581	0.999915	0.594197	0.790902	0.84867	0.999967	0.999528	0.999951	0.93361	0.31313	0.387854	0.999963	0.805638	0.950269	0.789035	0.00454577	0.226109	0.999996	0.151451	0.932819
Slc17a9	1700019H03RIK	#N/A	#N/A	0.0194897	0.965663	0.429014	0.438979	0.122436	0.441492	0.995705	0.999925	0.999976	0.629718	0.999936	0.999956	0.932595	0.999982	0.737314	0.213704	0.258088	0.212292	0.23442	0.0444766	0.0473871	0.999996	0.684291	0.579165	0.946978	0.999939	0.938581	0.949273	0.0116443	0.611619	0.591486	0.999967	0.961605	0.999951	0.29127	0.030953	0.0320776	0.999963	0.54911	0.844412	0.543694	0.566949	0.582744	0.999996	0.92531	0.960815
Fam187b	1700020B09RIK	#N/A	#N/A	0.746479	0.76362	0.331447	0.746269	0.745602	0.0291012	0.338649	0.999925	0.962967	0.54743	0.999936	0.999956	0.676139	0.996566	0.992767	0.0115196	0.185656	0.996772	0.993719	0.980999	0.193572	0.999996	0.201672	0.499678	0.999974	0.999939	0.999994	0.949273	0.673893	0.212022	0.677803	0.999967	0.947682	0.999951	0.991027	0.0891555	0.388785	0.999963	0.721568	0.950269	0.99929	0.0629328	0.331171	0.999996	0.544661	0.932819
Mtfp1	1700020C11RIK	#N/A	#N/A	0.180423	0.623493	0.502048	0.859668	0.677369	0.159401	0.48791	0.999925	0.94537	0.693373	0.999936	0.999956	0.907207	0.996566	0.403204	0.255416	0.333702	0.235479	0.986081	0.597186	0.056598	0.999996	0.733718	0.633833	0.946978	0.999939	0.959455	0.949273	0.231445	0.520561	0.720653	0.999967	0.961605	0.999951	0.593879	0.699655	0.0621461	0.999963	0.905504	0.950269	0.504215	0.182545	0.535515	0.999996	0.740575	0.960815
Tsacc	1700021C14RIK	#N/A	#N/A	0.868827	0.54267	0.0939591	0.617523	0.625593	0.620555	0.623308	0.999925	0.922549	0.256677	0.999936	0.999956	0.968615	0.996566	0.982138	0.68415	0.760119	0.666671	0.481392	0.773896	0.544863	0.999996	0.923664	0.894714	0.984983	0.999939	0.971714	0.958875	0.80366	0.400247	0.994942	0.999967	0.947682	0.999951	0.549309	0.56811	0.884542	0.999963	0.896959	0.999961	0.671919	0.94071	0.521999	0.999996	0.999976	0.960815
Mtres1	1700021F05RIK	#N/A	#N/A	0.256635	0.729878	0.580024	0.69274	0.458895	0.507743	0.624946	0.999925	0.962967	0.745274	0.999936	0.999956	0.9475	0.996566	0.0976823	0.333956	0.0235242	0.449726	0.801546	0.947401	0.87955	0.999996	0.763416	0.183086	0.963213	0.999939	0.999994	0.999915	0.756556	0.805611	0.942057	0.999967	0.999993	0.999951	0.255107	0.468195	0.625465	0.999963	0.846361	0.960042	0.2318	0.515883	0.568481	0.999996	0.908752	0.960815
Rubcn	1700021K19RIK	#N/A	#N/A	0.903035	0.699843	0.0471957	0.617012	0.981975	0.248148	0.882822	0.999925	0.962967	0.160911	0.999936	0.999956	0.907207	0.999982	0.775483	0.189194	0.130199	0.790175	0.694507	0.721829	0.335203	0.999996	0.665657	0.425784	0.989268	0.999939	0.971638	0.949273	0.920369	0.59041	0.806777	0.999967	0.961605	0.999951	0.60745	0.462588	0.353676	0.999963	0.842789	0.950269	0.943718	0.278312	0.645686	0.999996	0.817341	0.960815
Polr1has	1700022C21RIK	#N/A	#N/A	0.702399	0.688281	0.255451	0.684772	0.705083	0.24599	0.706395	0.999925	0.962967	0.473132	0.999936	0.999956	0.907207	0.996566	0.576112	0.0893538	0.566435	0.570703	0.579744	0.559604	0.541863	0.999996	0.515471	0.788846	0.964701	0.999939	0.956624	0.958875	0.651351	0.647325	0.641955	0.999967	0.961605	0.999951	0.345211	0.329582	0.318767	0.999963	0.805638	0.950269	0.997403	0.17063	0.978982	0.999996	0.740575	0.999996
Rnf185	1700022N24RIK	#N/A	#N/A	0.560326	0.0950219	0.574834	0.89431	0.547513	0.541285	0.389433	0.999925	0.729856	0.740461	0.999936	0.999956	0.9475	0.996566	0.455417	0.378099	0.282427	0.708176	0.464842	0.319622	0.824102	0.999996	0.773889	0.601941	0.984983	0.999939	0.938581	0.992077	0.429542	0.465827	0.505133	0.999967	0.961605	0.999951	0.384035	0.94497	0.927908	0.999963	0.999992	0.999961	0.988681	0.10241	0.591694	0.999996	0.63952	0.960815
Cir1	1700023B02RIK	#N/A	#N/A	0.749941	0.910106	0.976181	0.903048	0.620759	0.979711	0.884356	0.999925	0.999976	0.999944	0.999936	0.999956	0.999914	0.999982	0.647667	0.13865	0.389667	0.653351	0.775621	0.161652	0.478983	0.999996	0.607254	0.671873	0.984983	0.999939	0.938581	0.958875	0.556289	0.919989	0.986308	0.999967	0.999993	0.999951	0.600781	0.0515244	0.416595	0.999963	0.67532	0.950944	0.904435	0.952615	0.85598	0.999996	0.999976	0.999996
Ikbip	1700023M03RIK	#N/A	#N/A	0.298182	0.726644	0.0964122	0.313682	0.726214	0.0956709	0.314501	0.999925	0.962967	0.261184	0.999936	0.999956	0.851666	0.996566	0.271044	0.277123	0.0359599	0.967563	0.287938	0.314311	0.969733	0.999996	0.749075	0.227753	0.999974	0.999939	0.938581	0.999915	0.652583	0.196425	0.2014	0.999967	0.947682	0.999951	0.407786	0.0908374	0.106538	0.999963	0.721568	0.950269	0.287346	0.303013	0.998922	0.999996	0.817341	0.999996
Psenen	1700023M09RIK	#N/A	#N/A	0.99048	0.937874	0.477231	0.856835	0.982108	0.479888	0.253952	0.999925	0.999976	0.673133	0.999936	0.999956	0.94738	0.996566	0.828254	0.512972	0.285027	0.751476	0.838485	0.743164	0.371819	0.999996	0.855983	0.604892	0.984983	0.999939	0.971638	0.949273	0.981994	0.679176	0.386915	0.999967	0.961605	0.999951	0.716072	0.776347	0.61584	0.999963	0.944777	0.960042	0.993662	0.553512	0.46564	0.999996	0.924968	0.96076
Sgf29	1700023O11RIK	#N/A	#N/A	0.531596	0.555361	0.0497266	0.0634872	0.527085	0.553052	0.0698416	0.999925	0.922549	0.167276	0.999936	0.999956	0.9475	0.996566	0.506074	0.57223	0.0721965	0.0665244	0.552494	0.535862	0.066264	0.999996	0.867114	0.319514	0.946978	0.999939	0.953346	0.949273	0.952546	0.976275	0.692193	0.999967	0.999993	0.999951	0.404446	0.521805	0.982102	0.999963	0.881003	0.999961	0.533127	0.55771	0.0752898	0.999996	0.92531	0.932819
1700025G04Rik	1700025G04RIK	#N/A	#N/A	0.527096	0.519812	0.998524	0.994998	0.519299	0.517219	0.20234	0.999925	0.922549	0.999944	0.999936	0.999956	0.9475	0.996566	0.522018	0.518423	0.521571	0.0592498	0.514258	0.515833	0.522013	0.999996	0.855983	0.771252	0.946978	0.999939	0.953346	0.958875	0.362077	0.356797	0.36054	0.999967	0.947682	0.999951	0.35611	0.354981	0.0766058	0.999963	0.805638	0.950269	0.993401	0.997795	0.380861	0.999996	0.999976	0.932819
Spatc1l	1700027D21RIK	#N/A	#N/A	0.30141	0.335687	0.345001	0.307074	0.368093	0.30855	0.362556	0.999925	0.861222	0.556443	0.999936	0.999956	0.907207	0.996566	0.387667	0.880458	0.421532	0.0718555	0.255321	0.491127	0.865553	0.999996	0.988267	0.702648	0.946978	0.999939	0.953346	0.999915	0.340407	0.328881	0.340811	0.999967	0.947682	0.999951	0.853105	0.721361	0.194614	0.999963	0.915465	0.950269	0.143289	0.530098	0.218928	0.999996	0.915558	0.932819
Dennd6b	1700027J05RIK	#N/A	#N/A	0.557575	0.593103	0.660148	0.370777	0.961184	0.852978	0.187402	0.999925	0.932626	0.809388	0.999936	0.999956	0.999914	0.996566	0.973551	0.189961	0.773247	0.0863932	0.554043	0.0977554	0.570805	0.999996	0.66664	0.898194	0.946978	0.999939	0.938581	0.962563	0.632142	0.588183	0.742618	0.999967	0.961605	0.999951	0.618973	0.0264071	0.350882	0.999963	0.505526	0.950269	0.723028	0.817807	0.154048	0.999996	0.982958	0.932819
Sh3d21	1700029G01RIK	#N/A	#N/A	0.44505	0.142179	1.07479e-06	0.639022	0.841275	0.0666021	0.201313	0.999925	0.783883	3.95291e-05	0.999936	0.999956	0.814074	0.996566	0.3442	0.0292662	0.000284539	0.0735449	0.839857	0.0845257	0.787242	0.999996	0.340876	0.0144515	0.946978	0.999939	0.938581	0.978244	0.714526	0.800506	0.595552	0.999967	0.999993	0.999951	0.564933	0.701669	0.237904	0.999963	0.905873	0.950269	0.458172	0.0173381	0.184666	0.999996	0.305208	0.932819
Ndufb11b	1700029P11RIK	#N/A	#N/A	0.999532	0.73504	0.391221	0.436812	0.635374	0.073251	0.786726	0.999925	0.962967	0.595486	0.999936	0.999956	0.824894	0.996762	0.871038	0.803287	0.518205	0.807905	0.736482	0.0749473	0.390526	0.999996	0.944017	0.769016	0.99535	0.999939	0.938581	0.950709	0.753959	0.163878	0.736567	0.999967	0.947682	0.999951	0.904343	0.165626	0.6699	0.999963	0.775838	0.960042	0.721738	0.268946	0.433303	0.999996	0.817341	0.942659
1700030K09Rik	1700030K09RIK	#N/A	#N/A	0.297982	0.275289	0.995139	0.979403	0.283455	0.288646	0.0381647	0.999925	0.861222	0.999944	0.999936	0.999956	0.907207	0.996566	0.108685	0.108101	0.118651	0.0995554	0.109184	0.0976176	0.10618	0.999996	0.555075	0.409356	0.946978	0.999939	0.938581	0.949273	0.982958	0.983988	0.178363	0.999967	0.999993	0.999951	0.970059	0.413116	0.602859	0.999963	0.810066	0.960042	0.11847	0.112258	0.112334	0.999996	0.666254	0.932819
Timm21	1700034H14RIK	#N/A	#N/A	0.776331	0.360037	0.293471	0.707747	0.128241	0.859113	0.280116	0.999925	0.861222	0.514695	0.999936	0.999956	0.999914	0.996566	0.193418	0.208084	0.000886582	0.462355	0.948994	0.940859	0.390986	0.999996	0.682623	0.0285311	0.963213	0.999939	0.999994	0.950709	0.225966	0.616413	0.63014	0.999967	0.961605	0.999951	0.359601	0.325428	0.926434	0.999963	0.805638	0.999961	0.362064	0.427016	0.293215	0.999996	0.834863	0.932819
1700037H04Rik	1700037H04RIK	#N/A	#N/A	0.351428	0.751959	0.238092	0.918182	0.419961	0.812532	0.160582	0.999925	0.962967	0.454628	0.999936	0.999956	0.98592	0.996566	0.086312	0.996693	0.017121	0.21959	0.997621	0.933564	0.772666	0.999996	0.999842	0.152354	0.946978	0.999939	0.999994	0.973317	0.917305	0.653398	0.290483	0.999967	0.961605	0.999951	0.163764	0.943012	0.440455	0.999963	0.999992	0.959251	0.282652	0.960548	0.345826	0.999996	0.999976	0.932819
Pradc1	1700040I03RIK	#N/A	#N/A	0.0702876	0.478996	0.0011036	0.764567	0.0791961	0.558897	0.0440153	0.999925	0.922549	0.0101098	0.999936	0.999956	0.9475	0.996566	0.505978	0.867776	0.0331636	0.187585	0.543941	0.771289	0.303283	0.999996	0.981044	0.218921	0.946978	0.999939	0.971638	0.949273	0.00676632	0.286731	0.149711	0.999967	0.947682	0.999951	0.296329	0.703878	0.804186	0.999963	0.906851	0.999961	0.971023	0.938781	0.155816	0.999996	0.999976	0.932819
Phospho2	1700048E23RIK	#N/A	#N/A	0.432951	0.498628	2.95118e-05	0.720043	0.114518	0.176715	0.208113	0.999925	0.922549	0.000581359	0.999936	0.999956	0.907207	0.996566	0.218888	0.768972	0.522613	0.745692	0.693831	0.0749216	0.178389	0.999996	0.932758	0.771722	0.984983	0.999939	0.938581	0.949273	0.154252	0.671989	0.575757	0.999967	0.961605	0.999951	0.313115	0.344428	0.517701	0.999963	0.805638	0.960042	0.492234	0.0987267	0.181481	0.999996	0.625996	0.932819
Rffl	1700051E09RIK	#N/A	#N/A	0.745428	0.378157	0.7087	0.364556	0.789307	0.368997	0.778305	0.999925	0.869552	0.842809	0.999936	0.999956	0.907207	0.996762	0.544011	0.971581	0.513091	0.54867	0.225058	0.0635564	0.213012	0.999996	0.999842	0.766454	0.963213	0.999939	0.938581	0.949273	0.965356	0.98954	0.373734	0.999967	0.999993	0.999951	0.153086	0.13205	0.147663	0.999963	0.762169	0.950269	0.697162	0.248344	0.678578	0.999996	0.800948	0.960815
Armt1	1700052N19RIK	#N/A	#N/A	0.630048	0.8605	0.0288017	0.346657	0.641995	0.582932	0.783336	0.999925	0.991587	0.113895	0.999936	0.999956	0.95081	0.996762	0.889546	0.834012	0.00281249	0.686492	0.484394	0.396031	0.143366	0.999996	0.960842	0.0575947	0.984983	0.999939	0.941206	0.949273	0.988722	0.753497	0.574247	0.999967	0.986679	0.999951	0.690073	0.454389	0.191161	0.999963	0.836407	0.950269	0.561907	0.656192	0.456063	0.999996	0.92531	0.955411
Hectd3	1700064K09RIK	#N/A	#N/A	0.174985	0.92719	0.781034	0.268004	0.229452	0.422902	0.631801	0.999925	0.999976	0.878193	0.999936	0.999956	0.924552	0.996566	0.65789	0.0518922	0.0624799	0.603684	0.759461	0.169543	0.291195	0.999996	0.429271	0.298448	0.971988	0.999939	0.938581	0.949273	0.0876975	0.537995	0.278515	0.999967	0.961605	0.999951	0.644958	0.0492321	0.335664	0.999963	0.662785	0.950269	0.908807	0.612172	0.650088	0.999996	0.92531	0.960815
Zfp763	1700065O13RIK	#N/A	#N/A	0.107151	0.241439	0.0359718	0.858124	0.838639	0.470975	0.263137	0.999925	0.860832	0.133217	0.999936	0.999956	0.94376	0.996566	0.0761457	0.994111	0.573337	0.897352	0.743454	0.598919	0.222804	0.999996	0.999842	0.791431	0.999974	0.999939	0.960186	0.949273	0.305196	0.179851	0.350272	0.999967	0.947682	0.999951	0.178838	0.630714	0.2171	0.999963	0.903977	0.950269	0.218968	0.754108	0.519567	0.999996	0.951786	0.960815
Rab31	1700093E07RIK	#N/A	#N/A	0.657566	0.0383742	2.1339e-05	0.818419	0.549857	0.186241	0.527804	0.999925	0.522157	0.000457807	0.999936	0.999956	0.907207	0.996566	0.241181	0.00370163	0.475574	0.054491	0.303478	0.852335	0.116902	0.999996	0.0964102	0.74829	0.946978	0.999939	0.997419	0.949273	0.402394	0.517559	0.487123	0.999967	0.961605	0.999951	0.110806	0.0413408	0.0151847	0.999963	0.616069	0.795409	0.922248	0.0413541	0.800403	0.999996	0.45609	0.99512
Stambpl1	1700095N21RIK	#N/A	#N/A	0.113111	0.0192652	0.00257401	0.424932	0.113878	0.411018	0.422893	0.999925	0.387692	0.0190253	0.999936	0.999956	0.915556	0.996566	0.0782073	0.00234995	0.285126	0.712303	0.285483	0.720959	0.0783608	0.999996	0.0722004	0.604909	0.984983	0.999939	0.971638	0.949273	0.99755	0.176464	0.99755	0.999967	0.947682	0.999951	0.599462	0.0164896	0.128986	0.999963	0.416056	0.950269	0.0636984	0.0606057	0.336112	0.999996	0.544661	0.932819
1700123O20Rik	1700123O20RIK	#N/A	#N/A	0.993255	0.570355	0.93326	0.507288	0.978493	0.60263	0.558931	0.999925	0.927122	0.989312	0.999936	0.999956	0.957691	0.996566	0.208002	0.554068	0.884095	0.0542258	0.194745	0.542922	0.548256	0.999996	0.859478	0.963102	0.946978	0.999939	0.953346	0.958875	0.989937	0.974317	0.956863	0.999967	0.999993	0.999951	0.0633285	0.98979	0.0637122	0.999963	0.999992	0.950269	0.979558	0.43453	0.371398	0.999996	0.840315	0.932819
Pno1	1810003N24RIK	#N/A	#N/A	0.904517	0.86787	0.00207251	0.793619	0.889601	0.505559	0.984703	0.999925	0.993716	0.0162448	0.999936	0.999956	0.9475	0.999982	0.957342	0.425975	0.189684	0.418676	0.767159	0.743277	0.628275	0.999996	0.807805	0.504738	0.963213	0.999939	0.971638	0.973317	0.991329	0.772791	0.871449	0.999967	0.992011	0.999951	0.868295	0.747325	0.381056	0.999963	0.929147	0.950269	0.800942	0.420601	0.813155	0.999996	0.831289	0.999436
Pigyl	1810008A14RIK	#N/A	#N/A	0.561344	0.675842	0.738465	0.0899949	0.600478	0.601853	0.627656	0.999925	0.962967	0.860837	0.999936	0.999956	0.957173	0.996566	0.0723696	0.469519	0.540015	0.583339	0.541325	0.0834062	0.0595544	0.999996	0.833463	0.779749	0.968255	0.999939	0.938581	0.949273	0.972315	0.949926	0.192598	0.999967	0.999993	0.999951	0.129734	0.123601	0.125187	0.999963	0.755836	0.950269	0.341006	0.416252	0.284721	0.999996	0.829024	0.932819
Fam207a	1810008A18RIK	#N/A	#N/A	0.316751	0.306273	0.55061	0.358594	0.416399	0.255578	0.203129	0.999925	0.861222	0.723105	0.999936	0.999956	0.907207	0.996566	0.299402	0.369058	0.452016	0.363488	0.396649	0.310621	0.20511	0.999996	0.769709	0.729361	0.946978	0.999939	0.938581	0.949273	0.369515	0.286561	0.279562	0.999967	0.947682	0.999951	0.351156	0.344504	0.282738	0.999963	0.805638	0.950269	0.260595	0.487858	0.0416464	0.999996	0.886794	0.932819
Chac1	1810008K03RIK	#N/A	#N/A	0.509548	0.293561	0.101392	0.295864	0.263434	0.288264	0.495595	0.999925	0.861222	0.271032	0.999936	0.999956	0.907207	0.996566	0.482573	0.183726	0.0369621	0.348853	0.278216	0.43031	0.424361	0.999996	0.661568	0.230928	0.946978	0.999939	0.953346	0.958875	0.293518	0.978283	0.402229	0.999967	0.999993	0.999951	0.331357	0.172312	0.722745	0.999963	0.775838	0.971276	0.36886	0.287567	0.382814	0.999996	0.817341	0.932819
Tmem160	1810008O21RIK	#N/A	#N/A	0.697187	0.525192	0.0843519	0.607572	0.868114	0.644057	0.149502	0.999925	0.922549	0.238955	0.999936	0.999956	0.973675	0.996566	0.369341	0.644113	0.918481	0.277093	0.825877	0.804203	0.187011	0.999996	0.907238	0.985646	0.946978	0.999939	0.980787	0.949273	0.892625	0.509223	0.56776	0.999967	0.961605	0.999951	0.43837	0.62196	0.866906	0.999963	0.903977	0.999961	0.630305	0.879409	0.0995544	0.999996	0.999976	0.932819
1810009A15Rik	1810009A15RIK	#N/A	#N/A	0.355052	0.784377	0.363306	0.367771	0.117782	0.758587	0.78321	0.999925	0.963769	0.571588	0.999936	0.999956	0.973675	0.996762	0.249505	0.670554	0.244143	0.662546	0.0508977	0.701669	0.0614636	0.999996	0.917251	0.562358	0.984983	0.999939	0.971638	0.949273	0.673287	0.711745	0.688404	0.999967	0.969647	0.999951	0.496425	0.516385	0.0708949	0.999963	0.876612	0.950269	0.0593924	0.978682	0.35653	0.999996	0.999976	0.932819
Calcoco1	1810009B06RIK	#N/A	#N/A	0.06201	0.0589498	0.685424	0.250074	0.00933426	0.690273	0.700503	0.999925	0.621765	0.828247	0.999936	0.999956	0.973675	0.996566	0.324056	0.333873	0.327716	0.746431	0.757458	0.336674	0.336664	0.999996	0.763416	0.629464	0.984983	0.999939	0.938581	0.949273	0.00160057	0.227359	0.226428	0.999967	0.947682	0.999951	0.400156	0.997025	0.404199	0.999963	0.999992	0.950269	0.603059	0.152061	0.624504	0.999996	0.724222	0.960815
Cgrrf1	1810009H17RIK	#N/A	#N/A	0.939634	0.110717	0.174491	0.228399	0.352834	0.209591	0.894894	0.999925	0.735109	0.379212	0.999936	0.999956	0.907207	0.999982	0.789132	0.289185	0.707409	0.487818	0.248474	0.0568859	0.0414216	0.999996	0.753596	0.875293	0.963213	0.999939	0.938581	0.932225	0.380376	0.754145	0.346914	0.999967	0.986679	0.999951	0.172414	0.388061	0.0130055	0.999963	0.807921	0.795409	0.606757	0.0958071	0.421625	0.999996	0.619055	0.936205
Ece2	1810009K13RIK	#N/A	#N/A	0.711488	0.0532337	0.0306488	0.646881	0.0395799	0.997235	0.547401	0.999925	0.601275	0.119303	0.999936	0.999956	0.999914	0.996566	0.152888	0.250901	0.126918	0.244207	0.80593	0.0159696	0.654561	0.999996	0.729272	0.422268	0.946978	0.999939	0.876678	0.973317	0.165604	0.263179	0.93409	0.999967	0.947682	0.999951	0.375849	0.0656423	0.396314	0.999963	0.695101	0.950269	0.0944047	0.0616162	0.298813	0.999996	0.544661	0.932819
Tmem176b	1810009M01RIK	#N/A	#N/A	0.0786901	0.464687	0.926208	0.529459	0.490863	0.706891	0.723158	0.999925	0.915897	0.985192	0.999936	0.999956	0.973675	0.996566	0.223094	0.0700947	0.00933408	0.871177	0.60874	0.0412811	0.59857	0.999996	0.471041	0.111006	0.999974	0.999939	0.938581	0.967346	0.448716	0.448718	0.84929	0.999967	0.961605	0.999951	0.683739	0.0361156	0.835856	0.999963	0.577386	0.999961	0.088674	0.798112	0.484133	0.999996	0.973625	0.960815
1810009N02Rik	1810009N02RIK	#N/A	#N/A	0.542895	0.111293	0.677412	0.5918	0.568572	0.599699	0.586572	0.999925	0.735109	0.821432	0.999936	0.999956	0.956495	0.996566	0.0835954	0.585962	0.596029	0.584084	0.567298	0.570736	0.58387	0.999996	0.875659	0.80586	0.968709	0.999939	0.95684	0.964674	0.981411	0.205844	0.996324	0.999967	0.947682	0.999951	0.16696	0.989122	0.999848	0.999963	0.999992	0.999961	0.311268	0.345386	0.352427	0.999996	0.817341	0.932819
Ccnq	1810009O10RIK	#N/A	#N/A	0.786969	0.327543	0.690663	0.713127	0.75395	0.77917	0.742957	0.999925	0.861222	0.83129	0.999936	0.999956	0.974002	0.996566	0.513556	0.962616	0.992264	0.994763	0.954007	0.500746	0.481836	0.999996	0.999842	0.999954	0.999974	0.999939	0.953346	0.958875	0.97614	0.38688	0.978036	0.999967	0.947682	0.999951	0.61543	0.657524	0.622155	0.999963	0.903977	0.960042	0.67811	0.616355	0.621171	0.999996	0.92531	0.960815
Ccdc28b	1810010N17RIK	#N/A	#N/A	0.672721	0.659813	0.686881	0.693202	0.695967	0.695267	0.665164	0.999925	0.961248	0.828876	0.999936	0.999956	0.973675	0.996566	0.580758	0.159843	0.637642	0.651459	0.681416	0.659761	0.597596	0.999996	0.636813	0.835346	0.984983	0.999939	0.971638	0.967346	0.98339	0.974567	0.979906	0.999967	0.999993	0.999951	0.911099	0.156398	0.952172	0.999963	0.775838	0.999961	0.538808	0.529598	0.531847	0.999996	0.915367	0.960815
Atg2a	1810013C15RIK	#N/A	#N/A	0.577554	0.617338	0.547121	0.567544	0.557898	0.0908602	0.566803	0.999925	0.940305	0.720866	0.999936	0.999956	0.842129	0.996566	0.997609	0.952801	0.884155	0.153014	0.162677	0.151293	0.971639	0.999996	0.999842	0.963102	0.946978	0.999939	0.938581	0.999915	0.985848	0.188152	0.999466	0.999967	0.947682	0.999951	0.323694	0.330829	0.30212	0.999963	0.805638	0.950269	0.330869	0.29798	0.330248	0.999996	0.817341	0.932819
Fuom	1810014F10RIK	#N/A	#N/A	0.994953	0.179326	0.617359	0.24243	0.55436	0.551163	0.508139	0.999925	0.810621	0.776351	0.999936	0.999956	0.9475	0.996566	0.555093	0.997543	0.521489	0.562317	0.993974	0.0572336	0.94962	0.999996	0.999842	0.771252	0.963213	0.999939	0.938581	0.999915	0.689419	0.603077	0.218572	0.999967	0.961605	0.999951	0.690528	0.193886	0.66086	0.999963	0.775838	0.960042	0.666344	0.170047	0.709321	0.999996	0.740575	0.964735
Tmem97	1810014L12RIK	#N/A	#N/A	0.949233	0.114386	0.97365	0.490564	0.550458	0.635125	0.0889081	0.999925	0.740801	0.999944	0.999936	0.999956	0.973618	0.996566	0.541047	0.251966	0.831881	0.0776474	0.903364	0.908664	0.670289	0.999996	0.729272	0.93364	0.946978	0.999939	0.999994	0.973317	0.570783	0.0871231	0.373024	0.999967	0.947682	0.999951	0.58317	0.346352	0.307404	0.999963	0.805638	0.950269	0.745621	0.493873	0.152897	0.999996	0.890499	0.932819
Retreg1	1810015C04RIK	#N/A	#N/A	0.852968	0.0282226	0.000525729	0.535109	0.795394	0.687015	0.363085	0.999925	0.453221	0.00574684	0.999936	0.999956	0.973675	0.996566	0.422404	0.158754	0.799232	0.323007	0.382936	0.252497	0.627141	0.999996	0.634847	0.911142	0.946978	0.999939	0.938581	0.973317	0.752081	0.193887	0.83482	0.999967	0.947682	0.999951	0.257562	0.850144	0.727187	0.999963	0.985118	0.971765	0.959104	0.0773869	0.295606	0.999996	0.57276	0.932819
Triap1	1810015M01RIK	#N/A	#N/A	0.692861	0.540698	0.00619391	0.0177726	0.0168596	0.869397	0.514985	0.999925	0.922549	0.036877	0.999936	0.999956	0.999914	0.996566	0.206778	0.966965	0.125745	0.0265482	0.184285	0.60505	0.117351	0.999996	0.999842	0.419616	0.946978	0.999939	0.961921	0.949273	0.0773847	0.619198	0.251498	0.999967	0.961605	0.999951	0.956251	0.700481	0.56767	0.999963	0.905544	0.960042	0.113346	0.725652	0.0240869	0.999996	0.942981	0.932819
Trappc2l	1810017G16RIK	#N/A	#N/A	0.925524	0.479551	0.14038	0.88005	0.552675	0.959024	0.382341	0.999925	0.922549	0.332443	0.999936	0.999956	0.999914	0.996566	0.217971	0.626045	0.0222069	0.563198	0.490304	0.189843	0.577807	0.999996	0.899147	0.176302	0.963213	0.999939	0.938581	0.964394	0.687235	0.700309	0.670613	0.999967	0.965009	0.999951	0.244621	0.274338	0.989398	0.999963	0.805638	0.999961	0.640955	0.481361	0.343924	0.999996	0.881459	0.932819
Alkbh3	1810020C19RIK	#N/A	#N/A	0.116111	0.596251	0.468111	0.398443	0.0390386	0.27081	0.265192	0.999925	0.932902	0.665191	0.999936	0.999956	0.907207	0.996566	0.443073	0.369875	0.0816726	0.855889	0.760572	0.693348	0.129552	0.999996	0.769709	0.343321	0.999974	0.999939	0.971638	0.949273	0.0296796	0.309724	0.862288	0.999967	0.947682	0.999951	0.529713	0.449753	0.427813	0.999963	0.834665	0.953406	0.667871	0.640132	0.124814	0.999996	0.92531	0.932819
Aamdc	1810020D17RIK	#N/A	#N/A	0.481646	0.937541	0.319357	0.785178	0.710784	0.819814	0.477601	0.999925	0.999976	0.537251	0.999936	0.999956	0.989289	0.996566	0.449027	0.193552	0.866736	0.161747	0.664118	0.311532	0.32418	0.999996	0.668082	0.954805	0.946978	0.999939	0.938581	0.949273	0.435944	0.913101	0.475377	0.999967	0.999993	0.999951	0.403264	0.112524	0.102078	0.999963	0.753337	0.950269	0.820803	0.836042	0.766225	0.999996	0.991953	0.982408
Tmem218	1810021J13RIK	#N/A	#N/A	0.529551	0.216134	0.215112	0.989581	0.99476	0.531846	0.531004	0.999925	0.854015	0.429319	0.999936	0.999956	0.9475	0.996566	0.540635	0.995905	0.224915	0.993442	0.996017	0.540048	0.538182	0.999996	0.999842	0.543422	0.999974	0.999939	0.953346	0.958875	0.670856	0.219954	0.68146	0.999967	0.947682	0.999951	0.685692	0.685198	0.690227	0.999963	0.903977	0.960042	0.645451	0.645045	0.636343	0.999996	0.92531	0.960815
Eci3	1810022C23RIK	#N/A	#N/A	0.348058	0.164945	3.60033e-19	0.272614	0.348058	0.164945	0.272614	0.999925	0.800507	1.79201e-16	0.999936	0.999956	0.907207	0.996566	0.168925	0.0853943	0.926659	0.236204	0.938368	0.835831	0.727733	0.999996	0.509954	0.989444	0.946978	0.999939	0.991786	0.973317	NaN	NaN	NaN	NA	NA	NA	0.315062	0.290321	0.558403	0.999963	0.805638	0.960042	0.355086	0.17447	0.280786	0.999996	0.740575	0.932819
Timm29	1810026J23RIK	#N/A	#N/A	0.859899	0.73287	0.0434185	0.729788	0.902573	0.719381	0.578499	0.999925	0.962967	0.152047	0.999936	0.999956	0.973675	0.996566	0.634819	0.879379	0.135954	0.803479	0.594672	0.894494	0.636636	0.999996	0.987731	0.433843	0.99301	0.999939	0.999994	0.973317	0.841473	0.639924	0.547988	0.999967	0.961605	0.999951	0.478838	0.840625	0.610867	0.999963	0.979831	0.960042	0.968102	0.989371	0.876027	0.999996	0.999976	0.999996
Tmem256	1810027O10RIK	#N/A	#N/A	0.0845843	0.142344	0.140101	0.807716	0.548281	0.275734	0.649841	0.999925	0.783883	0.332167	0.999936	0.999956	0.907207	0.996566	0.206078	0.0831328	0.822769	0.38735	0.288524	0.426198	0.860117	0.999996	0.503195	0.927309	0.949419	0.999939	0.950236	0.999915	0.425968	0.786658	0.883975	0.999967	0.997869	0.999951	0.885581	0.506329	0.476444	0.999963	0.872528	0.960042	0.105714	0.0788386	0.620076	0.999996	0.57335	0.960815
Sec11c	1810029G24RIK	#N/A	#N/A	0.400992	0.397775	0.0738068	0.368676	0.976544	0.96301	0.087607	0.999925	0.878304	0.219626	0.999936	0.999956	0.999914	0.996566	0.994265	0.370678	0.0752693	0.0856035	0.379664	0.998968	0.370409	0.999996	0.770027	0.326153	0.946978	0.999939	0.999994	0.949273	0.380866	0.387244	0.364865	0.999967	0.947682	0.999951	0.333506	0.327694	0.350911	0.999963	0.805638	0.950269	0.627465	0.618574	0.152554	0.999996	0.92531	0.932819
Smim8	1810030N24RIK	#N/A	#N/A	0.195298	0.697144	0.704601	0.607987	0.710475	0.788638	0.467948	0.999925	0.962967	0.839917	0.999936	0.999956	0.976502	0.996566	0.433711	0.786454	0.0892262	0.446487	0.700638	0.584474	0.435879	0.999996	0.934951	0.357555	0.963213	0.999939	0.959087	0.958875	0.176736	0.92011	0.859186	0.999967	0.999993	0.999951	0.0425869	0.148165	0.921997	0.999963	0.775838	0.999961	0.561541	0.683952	0.444925	0.999996	0.92531	0.950288
Smap2	1810031K02RIK	#N/A	#N/A	0.256437	0.42174	4.99476e-05	0.140732	0.932774	0.634072	0.661297	0.999925	0.892936	0.000887879	0.999936	0.999956	0.973618	0.996566	0.711429	0.912849	0.92272	0.621808	0.465782	0.15561	0.136023	0.999996	0.999842	0.987391	0.981216	0.999939	0.938581	0.949273	0.408365	0.822458	0.475258	0.999967	0.999993	0.999951	0.799131	0.283695	0.475288	0.999963	0.805638	0.960042	0.444607	0.357335	0.172024	0.999996	0.817341	0.932819
Dtwd1	1810033A06RIK	#N/A	#N/A	0.18319	0.323273	0.129801	0.069815	0.640941	0.0843776	0.533602	0.999925	0.861222	0.316716	0.999936	0.999956	0.839503	0.996566	0.249488	0.604288	0.615337	0.0884896	0.604905	0.964124	0.940993	0.999996	0.886194	0.819644	0.946978	0.999939	0.999994	0.999915	0.206963	0.0627982	0.383898	0.999967	0.947682	0.999951	0.334122	0.782439	0.337754	0.999963	0.947814	0.950269	0.544228	0.595388	0.100171	0.999996	0.92531	0.932819
Slirp	1810035L17RIK	#N/A	#N/A	0.196957	0.174453	0.591603	0.2253	0.975734	0.848839	0.94111	0.999925	0.808409	0.755091	0.999936	0.999956	0.999914	0.999982	0.40456	0.396393	0.260958	0.346654	0.310754	0.38356	0.466329	0.999996	0.787052	0.581703	0.946978	0.999939	0.938581	0.958875	0.372586	0.298039	0.385697	0.999967	0.947682	0.999951	0.561373	0.940025	0.495452	0.999963	0.999992	0.960042	0.356755	0.390634	0.404242	0.999996	0.82743	0.932819
Fcmr	1810037B05RIK	#N/A	#N/A	0.675593	0.650632	5.96604e-06	0.663304	0.235047	0.655479	0.666413	0.999925	0.956035	0.00015965	0.999936	0.999956	0.973675	0.996566	0.424023	0.102075	0.0167771	0.40832	0.980287	0.441673	0.9736	0.999996	0.540876	0.151184	0.957681	0.999939	0.953346	0.999915	0.383682	0.997067	0.998133	0.999967	0.999993	0.999951	0.653382	0.195855	0.665076	0.999963	0.775838	0.960042	0.352816	0.286635	0.303918	0.999996	0.817341	0.932819
Fam3a	1810037C20RIK	#N/A	#N/A	0.915745	0.297454	0.0173444	0.869695	0.342974	0.139824	0.587768	0.999925	0.861222	0.0794437	0.999936	0.999956	0.905524	0.996566	0.448845	0.672931	0.142022	0.367983	0.930803	0.0398899	0.841509	0.999996	0.917444	0.442065	0.946978	0.999939	0.938581	0.996306	0.425954	0.732691	0.774003	0.999967	0.979547	0.999951	0.611793	0.209406	0.40811	0.999963	0.778536	0.950269	0.579253	0.108193	0.643689	0.999996	0.653383	0.960815
Bola1	1810037G04RIK	#N/A	#N/A	0.455076	0.390654	0.206611	0.995137	0.165398	0.236941	0.435021	0.999925	0.874724	0.420301	0.999936	0.999956	0.907207	0.996566	0.303144	0.508417	0.166181	0.987961	0.210621	0.131421	0.399951	0.999996	0.853717	0.472059	0.999974	0.999939	0.938581	0.95127	0.632025	0.808394	0.565855	0.999967	0.999993	0.999951	0.854852	0.489184	0.494577	0.999963	0.860263	0.960042	0.157595	0.176429	0.600321	0.999996	0.740575	0.960815
Ap4b1	1810038H16RIK	#N/A	#N/A	0.427871	0.30266	0.263341	0.425434	0.583929	0.313758	0.454315	0.999925	0.861222	0.481653	0.999936	0.999956	0.907207	0.996566	0.407159	0.785861	0.706998	0.629288	0.52726	0.800686	0.446672	0.999996	0.934951	0.87509	0.982463	0.999939	0.979033	0.958875	0.415724	0.220217	0.975869	0.999967	0.947682	0.999951	0.414556	0.768543	0.874649	0.999963	0.940573	0.999961	0.833399	0.983761	0.199161	0.999996	0.999976	0.932819
Psmg3	1810042K04RIK	#N/A	#N/A	0.871542	0.814243	0.910648	0.472172	0.913447	0.799502	0.744098	0.999925	0.97609	0.974473	0.999936	0.999956	0.980627	0.996566	0.441207	0.847209	0.638674	0.874982	0.476323	0.727619	0.193517	0.999996	0.968804	0.836204	0.999974	0.999939	0.971638	0.949273	0.849943	0.989354	0.782325	0.999967	0.999993	0.999951	0.247353	0.901525	0.251542	0.999963	0.999992	0.950269	0.970251	0.731324	0.464706	0.999996	0.94527	0.960274
Cfap410	1810043G02RIK	#N/A	#N/A	0.77448	0.7678	0.76863	0.388036	0.766827	0.375893	0.381694	0.999925	0.962967	0.872127	0.999936	0.999956	0.907207	0.996566	0.999515	0.571339	0.578654	0.989278	0.991709	0.556257	0.998467	0.999996	0.86669	0.794736	0.999974	0.999939	0.955946	0.999915	0.676423	0.670134	0.220889	0.999967	0.961605	0.999951	0.993864	0.987444	0.991431	0.999963	0.999992	0.999961	0.994504	0.419964	0.99353	0.999996	0.831081	0.999996
Tsc22d2	1810043J12RIK	#N/A	#N/A	0.14888	0.0163016	0.974495	0.185211	0.0765767	0.0511622	0.989102	0.999925	0.361151	0.999944	0.999936	0.999956	0.77246	0.999982	0.58872	0.869009	0.995744	0.497334	0.128653	0.875339	0.855208	0.999996	0.981547	0.999954	0.963213	0.999939	0.999994	0.999915	0.843109	0.0187455	0.453446	0.999967	0.947682	0.999951	0.601159	0.99665	0.79483	0.999963	0.999992	0.997183	0.00380507	0.60958	0.18127	0.999996	0.92531	0.932819
Ippk	1810043M15RIK	#N/A	#N/A	0.212206	0.148789	0.00401372	0.989321	0.108528	0.465167	0.180961	0.999925	0.793872	0.0269482	0.999936	0.999956	0.942152	0.996566	0.704225	0.939163	0.484034	0.794816	0.98462	0.529848	0.29429	0.999996	0.999842	0.752825	0.990248	0.999939	0.953346	0.949273	0.0788999	0.17361	0.397588	0.999967	0.947682	0.999951	0.80402	0.730946	0.621115	0.999963	0.920988	0.960042	0.76699	0.563269	0.287099	0.999996	0.92531	0.932819
Cyb5b	1810044O22RIK	#N/A	#N/A	0.0462107	0.929879	0.998891	0.0283	0.814775	0.337706	0.784954	0.999925	0.999976	0.999944	0.999936	0.999956	0.907207	0.996762	0.487669	0.060443	0.30018	0.161632	0.167092	0.00568202	0.136116	0.999996	0.447973	0.612255	0.946978	0.999939	0.673365	0.949273	0.188018	0.536188	0.246224	0.999967	0.961605	0.999951	0.654718	0.00625983	0.951659	0.999963	0.27819	0.999961	0.109796	0.427049	0.0306965	0.999996	0.834863	0.932819
Zfp335	1810045J01RIK	#N/A	#N/A	0.382976	0.994851	0.0975941	0.973069	0.984181	0.404495	0.392509	0.999925	0.999976	0.263617	0.999936	0.999956	0.911548	0.996566	0.650145	0.671858	0.185022	0.646294	0.65587	0.653937	0.632796	0.999996	0.917381	0.498511	0.984983	0.999939	0.971638	0.973317	0.623961	0.644385	0.651563	0.999967	0.961605	0.999951	0.99647	0.98902	0.991602	0.999963	0.999992	0.999961	0.325163	0.339662	0.305939	0.999996	0.817341	0.932819
Klhl21	1810045K06RIK	#N/A	#N/A	0.220136	0.403729	0.282947	0.64966	0.227736	0.46204	0.428351	0.999925	0.882131	0.503091	0.999936	0.999956	0.942152	0.996566	0.480417	0.0182925	0.000627818	0.092006	0.102516	0.348683	0.0467228	0.999996	0.274241	0.0233199	0.946978	0.999939	0.938581	0.949273	0.986509	0.934172	0.313967	0.999967	0.999993	0.999951	0.461465	0.0163331	0.00902741	0.999963	0.416056	0.724716	0.138407	0.332126	0.831653	0.999996	0.817341	0.999996
Mien1	1810046J19RIK	#N/A	#N/A	0.574553	0.551184	0.245624	0.550546	0.559039	0.263315	0.643772	0.999925	0.922549	0.462855	0.999936	0.999956	0.907207	0.996566	0.590119	0.77998	0.8862	0.719573	0.5394	0.151424	0.480199	0.999996	0.933649	0.964564	0.984983	0.999939	0.938581	0.958875	0.986445	0.69627	0.9207	0.999967	0.963132	0.999951	0.955317	0.388305	0.796011	0.999963	0.807921	0.997375	0.444423	0.255538	0.47899	0.999996	0.809259	0.960815
Ufsp2	1810047C23RIK	#N/A	#N/A	0.479943	0.357149	0.00360709	0.655436	0.882367	0.0302812	0.64739	0.999925	0.861222	0.0248208	0.999936	0.999956	0.678373	0.996566	0.370732	0.412375	0.148232	0.904323	0.867205	0.0652554	0.514319	0.999996	0.798392	0.449513	0.999974	0.999939	0.938581	0.958875	0.738743	0.435608	0.994668	0.999967	0.954329	0.999951	0.549847	0.549082	0.763922	0.999963	0.890018	0.985561	0.445998	0.0105398	0.421492	0.999996	0.231819	0.936189
Rab43	1810048P08RIK	#N/A	#N/A	0.965502	0.97644	9.78211e-05	0.460601	0.468604	0.510994	0.950378	0.999925	0.999976	0.00154079	0.999936	0.999956	0.9475	0.999982	0.287969	0.688442	0.0038009	0.330394	0.713496	0.306466	0.805318	0.999996	0.925002	0.0681007	0.946978	0.999939	0.938581	0.983721	0.590481	0.620152	0.593554	0.999967	0.961605	0.999951	0.317502	0.3198	0.392119	0.999963	0.805638	0.950269	0.624337	0.661386	0.610028	0.999996	0.92531	0.960815
Oxld1	1810049H13RIK	#N/A	#N/A	0.935822	0.547569	0.00632956	0.476522	0.751708	0.211861	0.129491	0.999925	0.922549	0.0373569	0.999936	0.999956	0.907207	0.996566	0.941182	0.25084	0.0503259	0.167213	0.691006	0.535889	0.659293	0.999996	0.729272	0.267329	0.946978	0.999939	0.953346	0.973317	0.874276	0.221741	0.580078	0.999967	0.947682	0.999951	0.779722	0.29876	0.57048	0.999963	0.805638	0.960042	0.769861	0.62722	0.109943	0.999996	0.92531	0.932819
Tmem86a	1810054O13RIK	#N/A	#N/A	0.406756	0.1386	0.360897	0.777913	0.843142	0.0894404	0.218036	0.999925	0.77897	0.57086	0.999936	0.999956	0.839503	0.996566	0.647003	1.485e-05	9.93558e-06	0.62101	0.291602	0.0553299	0.058118	0.999996	0.00184783	0.00157828	0.981216	0.999939	0.938581	0.949273	0.516751	0.884003	0.544245	0.999967	0.999993	0.999951	0.356053	0.000456397	0.146466	0.999963	0.0577536	0.950269	0.61229	0.0179578	0.232057	0.999996	0.311672	0.932819
Dennd10	1810055E12RIK	#N/A	#N/A	0.208346	0.970776	0.0547204	0.813467	0.228864	0.836546	0.712075	0.999925	0.999976	0.179915	0.999936	0.999956	0.996747	0.996566	0.692913	0.0806707	0.0466058	0.551505	0.644847	0.118475	0.659314	0.999996	0.497129	0.257556	0.963213	0.999939	0.938581	0.973317	0.122685	0.875677	0.697247	0.999967	0.999993	0.999951	0.527229	0.0214002	0.444899	0.999963	0.476936	0.960042	0.964727	0.894961	0.917348	0.999996	0.999976	0.999996
1810055G02Rik	1810055G02RIK	#N/A	#N/A	0.532451	0.316476	2.39973e-05	0.110102	0.878982	0.0328199	0.138312	0.999925	0.861222	0.000494928	0.999936	0.999956	0.688295	0.996566	0.861314	0.0844561	0.0414878	0.0227414	0.435495	0.452833	0.936015	0.999996	0.506872	0.243903	0.946978	0.999939	0.953346	0.999915	0.757645	0.436894	0.936432	0.999967	0.954558	0.999951	0.582903	0.561896	0.198383	0.999963	0.896402	0.950269	0.554022	0.0235458	0.026857	0.999996	0.348133	0.932819
Sil1	1810057E01RIK	#N/A	#N/A	0.0966495	0.777741	0.0765133	0.86287	0.907397	0.35955	0.184102	0.999925	0.96375	0.224812	0.999936	0.999956	0.907207	0.996566	0.193526	0.662642	0.706868	0.649423	0.79376	0.904474	0.3885	0.999996	0.913024	0.87509	0.984983	0.999939	0.999994	0.950709	0.289349	0.416219	0.4279	0.999967	0.947682	0.999951	0.516387	0.844689	0.798988	0.999963	0.982051	0.99844	0.201333	0.644751	0.280877	0.999996	0.92531	0.932819
Mterf4	1810059A23RIK	#N/A	#N/A	0.429443	0.337848	0.765093	0.753001	0.744186	0.76712	0.413514	0.999925	0.861222	0.871557	0.999936	0.999956	0.973675	0.996566	0.341671	0.112607	0.688273	0.38988	0.841256	0.753088	0.756689	0.999996	0.560984	0.865069	0.949419	0.999939	0.971638	0.973317	0.75078	0.649958	0.730499	0.999967	0.961605	0.999951	0.596693	0.187054	0.69768	0.999963	0.775838	0.960042	0.421486	0.36673	0.414885	0.999996	0.817341	0.933873
Tmem179b	1810059G22RIK	#N/A	#N/A	0.916757	0.302258	0.975496	0.1276	0.938146	0.645241	0.223068	0.999925	0.861222	0.999944	0.999936	0.999956	0.973675	0.996566	0.424615	0.543879	0.617788	0.470101	0.347008	0.881519	0.144319	0.999996	0.856923	0.82159	0.963213	0.999939	0.999994	0.949273	0.964774	0.0235711	0.602089	0.999967	0.947682	0.999951	0.196444	0.567449	0.566558	0.999963	0.896623	0.960042	0.924487	0.763398	0.160334	0.999996	0.957198	0.932819
Polr2f	1810060D16RIK	#N/A	#N/A	0.347404	0.5993	0.456483	0.73641	0.775526	0.50949	0.963608	0.999925	0.9341	0.655405	0.999936	0.999956	0.9475	0.999982	0.926935	0.484955	0.240372	0.522895	0.547388	0.577305	0.346861	0.999996	0.842998	0.558375	0.963213	0.999939	0.959087	0.949273	0.425835	0.441897	0.802869	0.999967	0.957995	0.999951	0.728274	0.396917	0.288679	0.999963	0.807921	0.950269	0.615676	0.917799	0.824339	0.999996	0.999976	0.999996
Ccdc91	1810060J02RIK	#N/A	#N/A	0.391916	0.989702	0.366892	0.995748	0.40914	0.996961	0.0997824	0.999925	0.999976	0.5745	0.999936	0.999956	0.999914	0.996566	0.294997	0.719544	0.736275	0.304268	0.727547	0.729928	0.7213	0.999996	0.932672	0.888396	0.946978	0.999939	0.971638	0.973317	0.97961	0.994065	0.180268	0.999967	0.999993	0.999951	0.641256	0.642506	0.654786	0.999963	0.903977	0.960042	0.2996	0.991676	0.303627	0.999996	0.999976	0.932819
Coa6	1810063B05RIK	#N/A	#N/A	0.580272	0.474213	0.634623	0.594161	0.918373	0.830516	0.709324	0.999925	0.921999	0.789156	0.999936	0.999956	0.995236	0.996566	0.776656	0.533367	0.888565	0.392475	0.679371	0.92914	0.492285	0.999996	0.85673	0.965403	0.949419	0.999939	0.999994	0.958875	0.698044	0.426822	0.439317	0.999967	0.948449	0.999951	0.896643	0.479227	0.135345	0.999963	0.855306	0.950269	0.690811	0.759764	0.922223	0.999996	0.954727	0.999996
1810064F22Rik	1810064F22RIK	#N/A	#N/A	0.77841	0.955205	0.000172711	0.837832	0.320302	0.970319	0.736145	0.999925	0.999976	0.00242836	0.999936	0.999956	0.999914	0.996566	0.218398	0.35407	0.486359	0.478984	0.570499	0.345075	0.840566	0.999996	0.767956	0.754864	0.963213	0.999939	0.938581	0.995821	0.359014	0.946059	0.923523	0.999967	0.999993	0.999951	0.227416	0.210909	0.537016	0.999963	0.78038	0.960042	0.625331	0.98971	0.71276	0.999996	0.999976	0.96522
Trappc6a	1810073E21RIK	#N/A	#N/A	0.172455	0.584368	0.0381697	0.676208	0.719274	0.791521	0.47794	0.999925	0.932283	0.138877	0.999936	0.999956	0.978028	0.996566	0.243624	0.957286	0.139877	0.608261	0.660859	0.485418	0.593427	0.999996	0.999842	0.439466	0.972229	0.999939	0.953346	0.965046	0.404078	0.815404	0.808773	0.999967	0.999993	0.999951	0.587241	0.634468	0.98737	0.999963	0.903977	0.999961	0.286939	0.614793	0.485528	0.999996	0.92531	0.960815
Fam114a2	1810073G14RIK	#N/A	#N/A	0.83872	0.234717	0.00730954	0.407634	0.772278	0.668731	0.991327	0.999925	0.859591	0.0419148	0.999936	0.999956	0.973675	0.999982	0.789901	0.606647	0.296906	0.695717	0.82853	0.809118	0.679589	0.999996	0.887231	0.611373	0.984983	0.999939	0.982709	0.973317	0.954072	0.283762	0.574045	0.999967	0.947682	0.999951	0.973752	0.856618	0.988431	0.999963	0.988793	0.999961	0.716307	0.570056	0.546369	0.999996	0.92531	0.960815
Slc38a10	1810073N04RIK	#N/A	#N/A	0.350692	0.758984	0.744807	0.750119	0.125923	0.355256	0.352397	0.999925	0.962967	0.863792	0.999936	0.999956	0.907207	0.996566	0.203314	0.520616	0.529727	0.524891	0.515305	0.996552	0.996872	0.999996	0.856548	0.774983	0.963213	0.999939	0.999994	0.999915	0.0799387	0.368148	0.361658	0.999967	0.947682	0.999951	0.152611	0.62256	0.62631	0.999963	0.903977	0.960042	0.678419	0.676366	0.679325	0.999996	0.92531	0.960815
Ufl1	1810074P20RIK	#N/A	#N/A	0.288385	0.0428961	0.853211	0.313261	0.300702	0.923787	0.319847	0.999925	0.538633	0.931578	0.999936	0.999956	0.999914	0.996566	0.963445	0.353268	0.905479	0.345255	0.943252	0.366185	0.351747	0.999996	0.767956	0.976641	0.946978	0.999939	0.938581	0.949273	0.129201	0.117415	0.146203	0.999967	0.947682	0.999951	0.936176	0.986282	0.207847	0.999963	0.999992	0.950269	0.985431	0.196099	0.992591	0.999996	0.748649	0.999996
Odf3b	2010001J22RIK	#N/A	#N/A	0.948261	0.763667	0.600332	0.874197	0.468625	0.0219378	0.332147	0.999925	0.962967	0.762561	0.999936	0.999956	0.668315	0.996566	0.746394	0.544695	0.0378673	0.0857302	0.212295	0.013957	0.679255	0.999996	0.856923	0.232773	0.946978	0.999939	0.851249	0.973317	0.678357	0.201747	0.609015	0.999967	0.947682	0.999951	0.262614	0.167964	0.13124	0.999963	0.775838	0.950269	0.523317	0.0415908	0.363812	0.999996	0.45609	0.932819
Oma1	2010001O09RIK	#N/A	#N/A	0.622504	0.390254	0.500382	0.478544	0.398008	0.6426	0.254678	0.999925	0.874724	0.69221	0.999936	0.999956	0.973675	0.996566	0.705272	0.30954	0.297882	0.123189	0.400272	0.616704	0.388103	0.999996	0.762382	0.611825	0.946978	0.999939	0.967613	0.950709	0.418812	0.423638	0.789506	0.999967	0.947682	0.999951	0.358389	0.255814	0.594784	0.999963	0.805638	0.960042	0.760033	0.732511	0.12433	0.999996	0.945474	0.932819
Eif1ad	2010003J03RIK	#N/A	#N/A	0.854393	0.0623346	0.264026	0.972851	0.931017	0.771066	0.737518	0.999925	0.630384	0.482376	0.999936	0.999956	0.973675	0.996566	0.754833	0.114967	0.212526	0.219936	0.547785	0.889734	0.401072	0.999996	0.565818	0.530374	0.946978	0.999939	0.999994	0.951553	0.951525	0.179012	0.85024	0.999967	0.947682	0.999951	0.549364	0.340856	0.182422	0.999963	0.805638	0.950269	0.826561	0.198962	0.764563	0.999996	0.749095	0.982099
Gatc	2010003O18RIK	#N/A	#N/A	0.860479	0.614755	0.945562	0.597493	0.808173	0.741369	0.688115	0.999925	0.93905	0.99528	0.999936	0.999956	0.973675	0.996566	0.586596	0.842942	0.788094	0.432573	0.638755	0.46591	0.803204	0.999996	0.967026	0.906472	0.963213	0.999939	0.953346	0.982685	0.774725	0.905234	0.930605	0.999967	0.999993	0.999951	0.43609	0.67995	0.676983	0.999963	0.903977	0.960042	0.961466	0.550095	0.505558	0.999996	0.924006	0.960815
Alkbh4	2010004B12RIK	#N/A	#N/A	0.16966	0.96943	0.979499	0.92879	0.991047	0.165629	0.154208	0.999925	0.999976	0.999944	0.999936	0.999956	0.907207	0.996566	0.172925	0.644417	0.167391	0.628283	0.65295	0.176536	0.677266	0.999996	0.907416	0.473207	0.982463	0.999939	0.938581	0.973317	0.335963	0.314989	0.28639	0.999967	0.947682	0.999951	0.310074	0.310062	0.969345	0.999963	0.805638	0.999961	0.334562	0.346684	0.350384	0.999996	0.817341	0.932819
Pcdh1	2010005A06RIK	#N/A	#N/A	0.995012	0.439142	0.426979	0.521738	0.428272	0.16095	0.1239	0.999925	0.901135	0.62789	0.999936	0.999956	0.907207	0.996566	0.442562	0.463412	0.377488	0.107393	0.962754	0.138296	0.485453	0.999996	0.83223	0.660339	0.946978	0.999939	0.938581	0.958875	0.621806	0.685936	0.178308	0.999967	0.961605	0.999951	0.646685	0.625562	0.150345	0.999963	0.903977	0.950269	0.51787	0.0884538	0.456902	0.999996	0.60176	0.955411
Urgcp	2010005J08RIK	#N/A	#N/A	0.448109	0.430415	0.161562	0.951751	0.455937	0.449351	0.971459	0.999925	0.898124	0.361469	0.999936	0.999956	0.937296	0.999982	0.445507	0.433015	0.139784	0.977982	0.437868	0.456432	0.94605	0.999996	0.812284	0.439466	0.999974	0.999939	0.953346	0.999915	0.377712	0.984698	0.988335	0.999967	0.999993	0.999951	0.369068	0.981283	0.981183	0.999963	0.999992	0.999961	0.990397	0.169638	0.93002	0.999996	0.740575	0.999996
Sft2d2	2010005O13RIK	#N/A	#N/A	0.0483436	0.0530158	0.479574	0.213189	0.980925	0.965894	0.514724	0.999925	0.600631	0.674801	0.999936	0.999956	0.999914	0.996566	0.525689	0.257987	0.487228	0.52632	0.204796	0.473981	0.238877	0.999996	0.736967	0.754971	0.963213	0.999939	0.953346	0.949273	0.188192	0.193202	0.691115	0.999967	0.947682	0.999951	0.681344	0.787859	0.724655	0.999963	0.950728	0.971324	0.141146	0.153004	0.160417	0.999996	0.72638	0.932819
Ppp1r35	2010007H12RIK	#N/A	#N/A	0.69954	0.424472	0.88007	0.565156	0.39979	0.963432	0.404964	0.999925	0.894843	0.951814	0.999936	0.999956	0.999914	0.996566	0.178143	0.694636	0.739105	0.0687102	0.995488	0.659023	0.757425	0.999996	0.927449	0.889966	0.946978	0.999939	0.971638	0.973317	0.736236	0.536407	0.848544	0.999967	0.961605	0.999951	0.253408	0.966829	0.0782461	0.999963	0.999992	0.950269	0.411067	0.611488	0.347483	0.999996	0.92531	0.932819
Fam210b	2010011I20RIK	#N/A	#N/A	0.453617	0.726866	0.0734859	0.572859	0.470849	0.297111	0.710398	0.999925	0.962967	0.219188	0.999936	0.999956	0.907207	0.996566	0.911116	0.173298	0.00137766	0.955102	0.161998	0.942826	0.36299	0.999996	0.646894	0.0371321	0.999974	0.999939	0.999994	0.949273	0.985818	0.664276	0.904496	0.999967	0.961605	0.999951	0.411944	0.411412	0.587755	0.999963	0.808983	0.960042	0.232666	0.256369	0.442743	0.999996	0.810976	0.948933
Chmp4b	2010012F05RIK	#N/A	#N/A	0.543761	0.91849	0.0721548	0.230213	0.250749	0.0115024	0.430081	0.999925	0.999976	0.216175	0.999936	0.999956	0.534342	0.996566	0.334858	0.00616747	0.0908085	0.668074	0.861348	0.267327	0.0909847	0.999996	0.135153	0.35986	0.984983	0.999939	0.938581	0.949273	0.723922	0.11501	0.787515	0.999967	0.947682	0.999951	0.665555	0.0406458	0.250265	0.999963	0.612412	0.950269	0.178693	0.043188	0.130289	0.999996	0.466443	0.932819
Romo1	2010100O12RIK	#N/A	#N/A	0.533073	0.989525	0.00352811	0.986416	0.694214	0.550986	0.928823	0.999925	0.999976	0.0243672	0.999936	0.999956	0.9475	0.999982	0.0968409	0.399246	0.582655	0.976258	0.550504	0.14604	0.885174	0.999996	0.789459	0.797744	0.999974	0.999939	0.938581	0.999915	0.870198	0.667172	0.9593	0.999967	0.961605	0.999951	0.090276	0.0864941	0.892906	0.999963	0.721568	0.999961	0.480809	0.684125	0.940869	0.999996	0.92531	0.999996
Sppl2a	2010106G01RIK	#N/A	#N/A	0.75051	0.757935	0.000175865	0.357141	0.780862	0.611312	0.845788	0.999925	0.962967	0.00244416	0.999936	0.999956	0.963491	0.999982	0.514571	0.0663695	0.0105599	0.419797	0.492661	0.245505	0.868251	0.999996	0.462234	0.118528	0.963213	0.999939	0.938581	0.999915	0.664668	0.883685	0.595134	0.999967	0.999993	0.999951	0.392622	0.0624898	0.678559	0.999963	0.689226	0.960042	0.978465	0.581578	0.451615	0.999996	0.92531	0.953127
Atp5mpl	2010107E04RIK	#N/A	#N/A	0.982261	0.983649	0.122424	0.468075	0.542045	0.51255	0.945348	0.999925	0.999976	0.304671	0.999936	0.999956	0.9475	0.999982	0.320015	0.921843	0.666029	0.93189	0.0994835	0.529903	0.349409	0.999996	0.999842	0.852197	0.999974	0.999939	0.953346	0.949273	0.702235	0.679731	0.66867	0.999967	0.961605	0.999951	0.0781975	0.714234	0.481857	0.999963	0.9125	0.960042	0.627994	0.604617	0.543076	0.999996	0.92531	0.960815
Cmc1	2010110K16RIK	#N/A	#N/A	0.0796235	0.12602	0.000728422	0.669208	0.318771	0.765055	0.835917	0.999925	0.758198	0.00731952	0.999936	0.999956	0.973675	0.999982	0.602558	0.189878	0.353416	0.713069	0.191591	0.957933	0.315644	0.999996	0.66664	0.6464	0.984983	0.999939	0.999994	0.949273	0.0800628	0.233051	0.8848	0.999967	0.947682	0.999951	0.23153	0.365639	0.366343	0.999963	0.805674	0.950269	0.551319	0.347133	0.631948	0.999996	0.817341	0.960815
Higd2a	2010110M21RIK	#N/A	#N/A	0.917355	0.894476	0.00348994	0.766555	0.217737	0.893086	0.347231	0.999925	0.999976	0.024193	0.999936	0.999956	0.999914	0.996566	0.482052	0.902308	0.300003	0.630042	0.64241	0.723465	0.125691	0.999996	0.997723	0.612255	0.982463	0.999939	0.971638	0.949273	0.405831	0.998979	0.634349	0.999967	0.999993	0.999951	0.876676	0.758671	0.199405	0.999963	0.935093	0.950269	0.369721	0.857537	0.408151	0.999996	0.999976	0.932819
Aopep	2010111I01RIK	#N/A	#N/A	0.301932	0.992105	0.0332966	0.279403	0.30382	0.954669	0.292033	0.999925	0.999976	0.126382	0.999936	0.999956	0.999914	0.996566	0.684825	0.62622	0.157557	0.155921	0.159757	0.655729	0.645707	0.999996	0.899147	0.460007	0.946978	0.999939	0.971638	0.973317	0.951677	0.334233	0.67364	0.999967	0.947682	0.999951	0.290097	0.331873	0.308942	0.999963	0.805638	0.950269	0.310324	0.981406	0.293379	0.999996	0.999976	0.932819
Tmem167b	2010200O16RIK	#N/A	#N/A	0.460562	0.140093	0.466967	0.463922	0.985829	0.4692	0.99327	0.999925	0.781112	0.664569	0.999936	0.999956	0.943201	0.999982	0.999031	0.391129	0.985372	0.989797	0.417124	0.105377	0.421293	0.999996	0.781969	0.999954	0.999974	0.999939	0.938581	0.958875	0.639745	0.632944	0.646293	0.999967	0.961605	0.999951	0.585611	0.596386	0.594275	0.999963	0.903977	0.960042	0.550676	0.0787746	0.548643	0.999996	0.57335	0.960815
Tmem68	2010300G19RIK	#N/A	#N/A	0.42218	0.349254	0.732461	0.375148	0.37043	0.881403	0.352874	0.999925	0.861222	0.858351	0.999936	0.999956	0.999914	0.996566	0.844159	0.405427	0.320201	0.142464	0.123171	0.9876	0.689859	0.999996	0.793842	0.624891	0.946978	0.999939	0.999994	0.973317	0.948097	0.456607	0.976405	0.999967	0.961605	0.999951	0.335254	0.546599	0.441257	0.999963	0.889616	0.959693	0.231972	0.571928	0.202323	0.999996	0.92531	0.932819
Aplf	2010301N04RIK	#N/A	#N/A	0.466428	0.153279	0.00091389	0.995692	0.466296	0.997745	0.995517	0.999925	0.795265	0.00877016	0.999936	0.999956	0.999914	0.999982	0.496002	0.0477032	0.00971602	0.999164	0.490847	0.500331	0.992574	0.999996	0.417039	0.113428	0.999974	0.999939	0.953346	0.999915	0.999832	0.176463	0.999832	0.999967	0.947682	0.999951	0.99449	0.0346007	0.99449	0.999963	0.566008	0.999961	0.402094	0.404847	0.994908	0.999996	0.82743	0.999996
Coa7	2010305A19RIK	#N/A	#N/A	0.999258	0.193334	0.185236	0.972777	0.978746	0.166167	0.997492	0.999925	0.830655	0.393785	0.999936	0.999956	0.907207	0.999982	0.99931	0.959331	0.413469	0.407006	0.986026	0.0970274	0.396675	0.999996	0.999842	0.69448	0.957681	0.999939	0.938581	0.951066	0.582194	0.0740434	0.427575	0.999967	0.947682	0.999951	0.990874	0.285702	0.302302	0.999963	0.805638	0.950269	0.989084	0.18863	0.987733	0.999996	0.74703	0.999996
Tlcd2	2010305C02RIK	#N/A	#N/A	0.336407	0.00504823	0.176299	0.859693	0.179622	0.341176	0.90608	0.999925	0.191432	0.381854	0.999936	0.999956	0.907207	0.999982	0.827809	0.677909	0.460751	0.869795	0.638469	0.0398473	0.840099	0.999996	0.920063	0.736698	0.999974	0.999939	0.938581	0.995821	0.0508864	0.0846418	0.7928	0.999967	0.947682	0.999951	0.68681	0.322803	0.830016	0.999963	0.805638	0.999961	0.814716	0.0293258	0.971995	0.999996	0.384105	0.999996
Mmadhc	2010311D03RIK	#N/A	#N/A	0.365852	0.581139	0.269188	0.660134	0.827428	0.580915	0.436435	0.999925	0.932283	0.488755	0.999936	0.999956	0.95081	0.996566	0.80205	0.591427	0.300551	0.817909	0.386862	0.591225	0.592685	0.999996	0.879776	0.612255	0.999756	0.999939	0.959087	0.96498	0.476937	0.485357	0.441589	0.999967	0.961605	0.999951	0.505114	0.522127	0.64745	0.999963	0.881045	0.960042	0.584582	0.999791	0.786541	0.999996	0.999976	0.990934
Use1	2010315L10RIK	#N/A	#N/A	0.984812	0.489083	0.25442	0.0549861	0.903364	0.783325	0.0802157	0.999925	0.922549	0.472172	0.999936	0.999956	0.975042	0.996566	0.59071	0.572833	0.540577	0.203458	0.64755	0.188447	0.0967736	0.999996	0.867323	0.780043	0.946978	0.999939	0.938581	0.949273	0.921599	0.769223	0.897644	0.999967	0.991774	0.999951	0.552918	0.265285	0.806594	0.999963	0.805638	0.999961	0.942663	0.498993	0.0161259	0.999996	0.895189	0.932819
Prorsd1	2010316F05RIK	#N/A	#N/A	0.447667	0.890814	0.0206214	0.897145	0.85381	0.0805135	0.835744	0.999925	0.999976	0.0899295	0.999936	0.999956	0.837022	0.999982	0.647486	0.707158	0.0297672	0.40091	0.166695	0.207785	0.359341	0.999996	0.932672	0.207027	0.954954	0.999939	0.938581	0.949273	0.601975	0.095178	0.760787	0.999967	0.947682	0.999951	0.106861	0.421294	0.124408	0.999963	0.813064	0.950269	0.576265	0.334064	0.963049	0.999996	0.817341	0.999996
Pigx	2010319C14RIK	#N/A	#N/A	0.382574	0.0387128	0.00207011	0.196902	0.614091	0.478999	0.0824908	0.999925	0.525509	0.0162448	0.999936	0.999956	0.947373	0.996566	0.837453	0.261525	0.328182	0.303532	0.658999	0.501928	0.360565	0.999996	0.737958	0.629872	0.946978	0.999939	0.953346	0.949273	0.324189	0.309288	0.733636	0.999967	0.947682	0.999951	0.717908	0.797058	0.947736	0.999963	0.955496	0.999961	0.79947	0.0660957	0.0484715	0.999996	0.553617	0.932819
Ints14	2010321M09RIK	#N/A	#N/A	0.469807	0.584326	0.0108619	0.744168	0.924865	0.168552	0.902393	0.999925	0.932283	0.0561991	0.999936	0.999956	0.907207	0.999982	0.739522	0.199308	0.991825	0.0439495	0.217353	0.385571	0.121279	0.999996	0.67703	0.999954	0.946978	0.999939	0.938581	0.949273	0.704034	0.61003	0.902147	0.999967	0.961605	0.999951	0.317782	0.783961	0.0296815	0.999963	0.948477	0.839402	0.477643	0.103685	0.695648	0.999996	0.641693	0.960815
Gchfr	2010323F13RIK	#N/A	#N/A	0.591584	0.336983	0.345775	0.426874	0.369947	0.934099	0.839635	0.999925	0.861222	0.557331	0.999936	0.999956	0.999914	0.999982	0.867254	0.223814	0.0276617	0.87991	0.214937	0.846428	0.404807	0.999996	0.696666	0.199346	0.999974	0.999939	0.995684	0.951603	0.815806	0.573591	0.703695	0.999967	0.961605	0.999951	0.493223	0.372233	0.664098	0.999963	0.807721	0.960042	0.267028	0.414144	0.43578	0.999996	0.829024	0.94569
Fam25c	2200001I15RIK	#N/A	#N/A	0.794434	0.0205569	0.156451	0.330057	0.664249	0.00113983	0.197905	0.999925	0.399471	0.353958	0.999936	0.999956	0.213743	0.996566	0.374615	1.25311e-06	4.2665e-07	0.0212167	0.524983	0.00699111	0.343022	0.999996	0.000283506	0.000199085	0.946978	0.999939	0.705346	0.949273	0.697149	0.529434	0.856167	0.999967	0.961605	0.999951	0.304656	0.0511289	0.330377	0.999963	0.674432	0.950269	0.853375	8.20674e-06	0.0252695	0.999996	0.00291652	0.932819
Mib2	2210008I11RIK	#N/A	#N/A	0.458493	0.978273	0.0314431	0.708441	0.729729	0.519259	0.911884	0.999925	0.999976	0.121571	0.999936	0.999956	0.9475	0.999982	0.830719	0.546334	0.0716381	0.344526	0.822301	0.891787	0.675961	0.999996	0.857279	0.318388	0.946978	0.999939	0.999994	0.973317	0.485723	0.690565	0.865141	0.999967	0.961605	0.999951	0.993989	0.744414	0.346738	0.999963	0.928064	0.950269	0.756912	0.601944	0.706738	0.999996	0.92531	0.962777
Pdxdc1	2210010A19RIK	#N/A	#N/A	0.629348	0.901441	0.490882	0.0822753	0.286736	0.0142822	0.136882	0.999925	0.999976	0.683871	0.999936	0.999956	0.564075	0.996566	0.604477	0.683135	0.662153	0.128287	0.917987	0.0201719	0.0624538	0.999996	0.922974	0.848985	0.946978	0.999939	0.884934	0.949273	0.286602	0.102666	0.853093	0.999967	0.947682	0.999951	0.759976	0.151375	0.78792	0.999963	0.775838	0.995092	0.676723	0.0708327	0.0309816	0.999996	0.567325	0.932819
Tceanc2	2210012G02RIK	#N/A	#N/A	0.1851	0.467988	0.0434735	0.774449	0.235403	0.272886	0.223741	0.999925	0.916352	0.152096	0.999936	0.999956	0.907207	0.996566	0.1009	0.653118	0.0390567	0.414839	0.455358	0.928679	0.935588	0.999996	0.910028	0.236111	0.962662	0.999939	0.999994	0.999915	0.93141	0.281277	0.370243	0.999967	0.947682	0.999951	0.588941	0.752151	0.66589	0.999963	0.931271	0.960042	0.0355487	0.737333	0.406687	0.999996	0.947601	0.932819
2210016L21Rik	2210016L21RIK	#N/A	#N/A	0.56377	0.567249	0.563771	0.556526	0.539193	0.517678	0.549974	0.999925	0.926518	0.731765	0.999936	0.999956	0.9475	0.996566	0.786419	0.174416	0.408289	0.406256	0.401526	0.812463	0.783827	0.999996	0.648824	0.690595	0.957117	0.999939	0.983598	0.977437	0.979726	0.95876	0.994604	0.999967	0.999993	0.999951	0.711224	0.303318	0.716949	0.999963	0.805638	0.968338	0.395594	0.384861	0.397736	0.999996	0.824406	0.932819
Zfp787	2210018M03RIK	#N/A	#N/A	0.886792	0.605912	2.32838e-07	0.519889	0.599375	0.6845	0.720429	0.999925	0.936204	1.08648e-05	0.999936	0.999956	0.973675	0.996566	0.620496	0.109536	0.000192228	0.836073	0.893673	0.13307	0.461015	0.999996	0.557538	0.0111254	0.999974	0.999939	0.938581	0.958875	0.604926	0.476563	0.823485	0.999967	0.961605	0.999951	0.650583	0.0340173	0.701003	0.999963	0.566008	0.96177	0.80462	0.943388	0.520258	0.999996	0.999976	0.960815
Med8	2210021A15RIK	#N/A	#N/A	0.0915545	0.265861	2.338e-05	0.565704	0.141424	0.926054	0.776246	0.999925	0.861222	0.000488323	0.999936	0.999956	0.999914	0.996566	0.38094	0.134538	0.0168475	0.447619	0.0331112	0.721867	0.301266	0.999996	0.601105	0.151364	0.963213	0.999939	0.971638	0.949273	0.894725	0.555162	0.621825	0.999967	0.961605	0.999951	0.454813	0.294358	0.313208	0.999963	0.805638	0.950269	0.00555678	0.244297	0.775789	0.999996	0.796152	0.987549
Cdpf1	2210021J22RIK	#N/A	#N/A	0.258959	0.370143	0.211008	0.38525	0.420123	0.262678	0.385003	0.999925	0.863983	0.425935	0.999936	0.999956	0.907207	0.996566	0.0304221	0.469788	0.306546	0.815075	0.385239	0.155447	0.818442	0.999996	0.833463	0.616286	0.998581	0.999939	0.938581	0.990013	0.33845	0.319013	0.389832	0.999967	0.947682	0.999951	0.23932	0.532175	0.685476	0.999963	0.884116	0.960042	0.074459	0.203293	0.997914	0.999996	0.751448	0.999996
Ces2g	2210023G05RIK	#N/A	#N/A	0.9692	0.353031	0.00090422	0.654063	0.523027	0.571518	0.0808395	0.999925	0.861222	0.00871085	0.999936	0.999956	0.948093	0.996566	0.602614	0.558877	0.647495	0.0460855	0.983031	0.799321	0.967218	0.999996	0.860737	0.841364	0.946978	0.999939	0.978707	0.999915	0.685948	0.375991	0.428578	0.999967	0.947682	0.999951	0.774443	0.631177	0.239024	0.999963	0.903977	0.950269	0.59262	0.743065	0.0594483	0.999996	0.94876	0.932819
Faf2	2210404D11RIK	#N/A	#N/A	0.360024	0.293382	0.415497	0.349872	0.302017	0.332968	0.270829	0.999925	0.861222	0.618318	0.999936	0.999956	0.907207	0.996566	0.298973	0.781539	0.618556	0.294928	0.986283	0.634278	0.644021	0.999996	0.933649	0.822464	0.946978	0.999939	0.971638	0.973317	0.335931	0.318783	0.314706	0.999967	0.947682	0.999951	0.466603	0.887219	0.673142	0.999963	0.999992	0.960042	0.465634	0.603838	0.301983	0.999996	0.92531	0.932819
Asnsd1	2210409M21RIK	#N/A	#N/A	0.772909	0.774042	0.150833	0.770151	0.75461	0.764915	0.765857	0.999925	0.963376	0.347459	0.999936	0.999956	0.973675	0.996566	0.556619	0.997871	0.249181	0.994318	0.990081	0.556589	0.560544	0.999996	0.999842	0.56875	0.999974	0.999939	0.955946	0.962047	0.986819	0.993441	0.996912	0.999967	0.999993	0.999951	0.692351	0.684745	0.69264	0.999963	0.903977	0.960042	0.667094	0.674893	0.67289	0.999996	0.92531	0.960815
Abhd17c	2210412D01RIK	#N/A	#N/A	0.0408427	0.276654	0.875021	0.533732	0.709418	0.525982	0.0742107	0.999925	0.861222	0.94776	0.999936	0.999956	0.9475	0.996566	0.735556	0.233091	0.272401	0.508402	0.0557427	0.439081	0.648815	0.999996	0.707135	0.592755	0.963213	0.999939	0.953346	0.973317	0.274773	0.276732	0.130409	0.999967	0.947682	0.999951	0.325728	0.235615	0.899037	0.999963	0.805638	0.999961	0.0642067	0.716856	0.349118	0.999996	0.939326	0.932819
Chmp5	2210412K09RIK	#N/A	#N/A	0.330255	0.326534	0.31357	0.296551	0.335534	0.297899	0.343647	0.999925	0.861222	0.532434	0.999936	0.999956	0.907207	0.996566	0.326374	0.307863	0.315158	0.301156	0.321198	0.337124	0.348706	0.999996	0.762382	0.621492	0.946978	0.999939	0.938581	0.949273	0.339559	0.318981	0.326381	0.999967	0.947682	0.999951	0.33059	0.329101	0.331139	0.999963	0.805638	0.950269	0.914604	0.545434	0.332434	0.999996	0.919797	0.932819
Slc45a3	2210413P12RIK	#N/A	#N/A	0.00543954	0.0804138	0.944725	0.493732	0.0912254	0.00113902	0.0404267	0.999638	0.690874	0.995217	0.999936	0.999956	0.213743	0.996566	0.143318	0.00313306	0.0180836	0.0560759	0.0687017	0.514665	0.965115	0.999996	0.0882694	0.157049	0.946978	0.999939	0.953346	0.999915	0.39367	0.229368	0.322834	0.999967	0.947682	0.999951	0.826875	0.160757	0.277659	0.999963	0.775838	0.950269	0.00413496	0.00155115	0.0626185	0.999996	0.0721176	0.932819
Vps36	2210415M20RIK	#N/A	#N/A	0.492272	0.890109	0.0126067	0.257131	0.683094	0.824521	0.535899	0.999925	0.999976	0.0626226	0.999936	0.999956	0.991446	0.996566	0.959775	0.214074	0.0032895	0.427715	0.226	0.385658	0.812965	0.999996	0.684291	0.0637375	0.963213	0.999939	0.938581	0.986297	0.827181	0.948063	0.181471	0.999967	0.999993	0.999951	0.272669	0.0759188	0.370797	0.999963	0.707439	0.950269	0.483273	0.816947	0.736472	0.999996	0.982696	0.975359
Rep15	2210417D09RIK	#N/A	#N/A	0.995076	0.468325	0.00086523	0.157482	0.994925	0.475236	0.984747	0.999925	0.916352	0.00841811	0.999936	0.999956	0.945911	0.999982	0.464624	0.464545	0.000940353	0.481233	0.472189	0.45775	0.482577	0.999996	0.832324	0.0300029	0.963213	0.999939	0.953346	0.958875	0.999912	0.406653	0.403406	0.999967	0.947682	0.999951	0.403743	0.396191	0.99899	0.999963	0.807921	0.999961	0.990451	0.991344	0.188192	0.999996	0.999976	0.932819
2210418O10Rik	2210418O10RIK	#N/A	#N/A	0.87649	0.539932	0.192065	0.999521	0.469387	0.894641	0.972451	0.999925	0.922549	0.401996	0.999936	0.999956	0.999914	0.999982	0.863265	0.455659	0.946687	0.837357	0.618445	0.855352	0.869727	0.999996	0.828844	0.999954	0.999974	0.999939	0.999383	0.999915	0.532312	0.596109	0.98071	0.999967	0.961605	0.999951	0.762919	0.394606	0.733219	0.999963	0.807921	0.975143	0.693799	0.739318	0.980625	0.999996	0.94831	0.999996
Apol7c	2210421G13RIK	#N/A	#N/A	0.997237	0.987305	0.000913901	0.99637	0.47488	0.034536	0.474217	0.999925	0.999976	0.00877016	0.999936	0.999956	0.695536	0.996566	0.751939	0.0327054	0.124833	0.751384	0.758654	0.759989	0.757782	0.999996	0.358559	0.419038	0.984983	0.999939	0.971638	0.973317	0.542434	0.0761825	0.542434	0.999967	0.947682	0.999951	0.99505	0.0917492	0.995282	0.999963	0.721568	0.999961	0.662133	0.191841	0.661185	0.999996	0.748649	0.960815
2300008B03Rik	2300008B03RIK	#N/A	#N/A	0.183723	0.995103	0.968964	0.959237	0.995792	0.188476	0.18053	0.999925	0.999976	0.999944	0.999936	0.999956	0.907207	0.996566	0.363615	0.374187	0.313811	0.312454	0.326709	0.327715	0.331329	0.999996	0.771161	0.620474	0.946978	0.999939	0.938581	0.949273	0.350683	0.355559	0.366937	0.999967	0.947682	0.999951	0.502472	0.405325	0.717922	0.999963	0.807921	0.968338	0.35122	0.356743	0.328535	0.999996	0.817341	0.932819
Apmap	2310001A20RIK	#N/A	#N/A	0.686773	0.945079	0.00268763	0.718898	0.571141	0.946421	0.947467	0.999925	0.999976	0.0196724	0.999936	0.999956	0.999914	0.999982	0.481527	0.787064	0.46181	0.198397	0.840012	0.785854	0.368745	0.999996	0.935082	0.737518	0.946978	0.999939	0.974453	0.949273	0.914423	0.928962	0.847135	0.999967	0.999993	0.999951	0.752225	0.734563	0.179116	0.999963	0.923047	0.950269	0.464379	0.998978	0.746556	0.999996	0.999976	0.976633
Gid8	2310003C23RIK	#N/A	#N/A	0.942351	0.742994	0.0204523	0.68402	0.187317	0.932199	0.940009	0.999925	0.962967	0.0895059	0.999936	0.999956	0.999914	0.999982	0.201631	0.696141	0.484103	0.567428	0.892868	0.420423	0.93304	0.999996	0.928271	0.752825	0.963479	0.999939	0.947488	0.999915	0.42209	0.876137	0.83135	0.999967	0.999993	0.999951	0.457116	0.441278	0.671323	0.999963	0.826763	0.960042	0.27912	0.746773	0.706182	0.999996	0.949687	0.962777
Hypk	2310003F16RIK	#N/A	#N/A	0.428908	0.959961	0.146876	0.35605	0.554456	0.54159	0.901214	0.999925	0.999976	0.341518	0.999936	0.999956	0.9475	0.999982	0.539255	0.384158	0.467484	0.324152	0.291374	0.941449	0.984945	0.999996	0.777727	0.74213	0.946978	0.999939	0.999994	0.999915	0.898463	0.72338	0.509216	0.999967	0.974082	0.999951	0.737657	0.481404	0.453043	0.999963	0.857005	0.960042	0.2745	0.596544	0.520885	0.999996	0.92531	0.960815
Faap100	2310003H01RIK	#N/A	#N/A	0.71333	0.991456	0.11613	0.66609	0.931172	0.340819	0.448374	0.999925	0.999976	0.29516	0.999936	0.999956	0.907207	0.996566	0.666855	0.194779	0.251366	0.396169	0.888655	0.739584	0.703214	0.999996	0.669222	0.570852	0.951245	0.999939	0.971638	0.973317	0.754654	0.506758	0.820536	0.999967	0.961605	0.999951	0.684748	0.250584	0.737061	0.999963	0.805638	0.977505	0.840701	0.500849	0.398955	0.999996	0.896397	0.932819
Ndufaf5	2310003L22RIK	#N/A	#N/A	0.329549	0.306933	0.341873	0.301986	0.342467	0.292399	0.342639	0.999925	0.861222	0.554734	0.999936	0.999956	0.907207	0.996566	0.335415	0.311986	0.374488	0.335225	0.336221	0.287284	0.308603	0.999996	0.762382	0.658477	0.946978	0.999939	0.938581	0.949273	0.773582	0.726388	0.357248	0.999967	0.976018	0.999951	0.982844	0.478793	0.467791	0.999963	0.854979	0.960042	0.342697	0.306891	0.32882	0.999996	0.817341	0.932819
Tmem127	2310003P10RIK	#N/A	#N/A	0.839444	0.883292	0.17874	0.940455	0.835612	0.296845	0.582117	0.999925	0.999976	0.384908	0.999936	0.999956	0.907207	0.996566	0.173533	0.651081	0.683602	0.901717	0.305336	0.75375	0.514521	0.999996	0.909235	0.86329	0.999974	0.999939	0.971638	0.958875	0.99774	0.491889	0.783229	0.999967	0.961605	0.999951	0.195663	0.938979	0.669495	0.999963	0.999992	0.960042	0.691721	0.386045	0.546279	0.999996	0.824406	0.960815
Adprm	2310004I24RIK	#N/A	#N/A	0.350553	0.33663	0.217274	0.279382	0.394739	0.354233	0.362565	0.999925	0.861222	0.430283	0.999936	0.999956	0.907207	0.996566	0.287457	0.313252	0.0931682	0.343343	0.768193	0.491292	0.504739	0.999996	0.762382	0.365141	0.946978	0.999939	0.953346	0.958875	0.376906	0.350435	0.324595	0.999967	0.947682	0.999951	0.206397	0.119792	0.787389	0.999963	0.753564	0.995062	0.651444	0.849644	0.35115	0.999996	0.996996	0.932819
Dmac2	2310004L02RIK	#N/A	#N/A	0.629099	0.453644	0.671528	0.588165	0.723428	0.396001	0.803484	0.999925	0.911202	0.817217	0.999936	0.999956	0.907207	0.999982	0.550104	0.341843	0.15421	0.894706	0.642804	0.478359	0.491631	0.999996	0.767412	0.456512	0.999974	0.999939	0.953346	0.958875	0.546363	0.941744	0.831688	0.999967	0.999993	0.999951	0.424214	0.852223	0.672871	0.999963	0.986465	0.960042	0.929626	0.282778	0.591373	0.999996	0.817341	0.960815
Akr1b10	2310005E10RIK	#N/A	#N/A	0.67542	0.000700047	9.69715e-05	0.475527	0.637193	0.0291731	0.759287	0.999925	0.0522655	0.00153081	0.999936	0.999956	0.676139	0.996566	0.109648	5.70233e-07	0.0042026	0.324699	0.0132161	0.731854	0.0416357	0.999996	0.000146805	0.071652	0.946978	0.999939	0.971638	0.932225	0.968137	0.282663	0.758488	0.999967	0.947682	0.999951	0.00191575	0.00010648	0.0154183	0.681095	0.0254174	0.795409	0.558037	0.000994957	0.502322	0.999996	0.0594029	0.960815
Meaf6	2310005N01RIK	#N/A	#N/A	0.550731	0.571302	0.100623	0.574513	0.570048	0.542237	0.555396	0.999925	0.927461	0.269748	0.999936	0.999956	0.9475	0.996566	0.612974	0.139084	0.0160192	0.615527	0.630686	0.149016	0.633015	0.999996	0.607254	0.148758	0.977148	0.999939	0.938581	0.973317	0.564349	0.560718	0.568861	0.999967	0.961605	0.999951	0.625116	0.153586	0.627531	0.999963	0.775838	0.960042	0.493161	0.305415	0.499333	0.999996	0.817341	0.960815
Cox20	2310005N03RIK	#N/A	#N/A	0.69306	0.583854	0.0673891	0.748648	0.38909	0.151113	0.989625	0.999925	0.932283	0.206284	0.999936	0.999956	0.907207	0.999982	0.903221	0.771612	0.131437	0.463981	0.523028	0.477893	0.713351	0.999996	0.932758	0.427585	0.963213	0.999939	0.953346	0.973317	0.46234	0.248014	0.85658	0.999967	0.947682	0.999951	0.640433	0.795458	0.50072	0.999963	0.954806	0.960042	0.663781	0.404822	0.757832	0.999996	0.82743	0.980982
Coq9	2310005O14RIK	#N/A	#N/A	0.893402	0.434611	0.337685	0.874965	0.776342	0.453508	0.709639	0.999925	0.898883	0.551393	0.999936	0.999956	0.939221	0.996566	0.851903	0.966598	0.0913323	0.949519	0.510818	0.937606	0.508871	0.999996	0.999842	0.361169	0.999974	0.999939	0.999994	0.958875	0.914011	0.278021	0.87702	0.999967	0.947682	0.999951	0.468601	0.917384	0.533236	0.999963	0.999992	0.960042	0.774574	0.982392	0.716839	0.999996	0.999976	0.96592
Eepd1	2310005P05RIK	#N/A	#N/A	0.235742	0.231786	0.223959	0.711433	0.0476996	0.0514531	0.210536	0.999925	0.859591	0.438629	0.999936	0.999956	0.772971	0.996566	0.0423619	0.00546047	0.191979	0.209275	0.207836	0.696723	0.665391	0.999996	0.123166	0.507368	0.946978	0.999939	0.971638	0.973317	0.555651	0.577104	0.531227	0.999967	0.961605	0.999951	0.548836	0.0740078	0.54127	0.999963	0.707439	0.960042	0.0346318	0.0358668	0.260457	0.999996	0.422866	0.932819
Aagab	2310007F21RIK	#N/A	#N/A	0.975687	0.593254	0.809052	0.948256	0.475766	0.975061	0.49171	0.999925	0.932666	0.899582	0.999936	0.999956	0.999914	0.996566	0.945213	0.53308	0.0528914	0.565568	0.523345	0.930596	0.201747	0.999996	0.85673	0.274991	0.963213	0.999939	0.999994	0.949273	0.631701	0.72405	0.661771	0.999967	0.974281	0.999951	0.702549	0.634543	0.221673	0.999963	0.903977	0.950269	0.602143	0.691793	0.598009	0.999996	0.92531	0.960815
Knop1	2310008H09RIK	#N/A	#N/A	0.537394	0.196234	0.24996	0.52061	0.911034	0.323267	0.536881	0.999925	0.832906	0.46777	0.999936	0.999956	0.907207	0.996566	0.639378	0.697641	0.454014	0.662113	0.892984	0.517877	0.544717	0.999996	0.928917	0.731344	0.984983	0.999939	0.953346	0.958875	0.675868	0.0706412	0.983428	0.999967	0.947682	0.999951	0.824801	0.495541	0.910563	0.999963	0.863867	0.999961	0.651739	0.845649	0.437705	0.999996	0.996344	0.947663
Ostc	2310008M10RIK	#N/A	#N/A	0.754881	0.444573	0.515198	0.964712	0.946534	0.181611	0.758617	0.999925	0.903745	0.702937	0.999936	0.999956	0.907207	0.996566	0.594803	0.0859876	0.282909	0.208519	0.82316	0.978915	0.293895	0.999996	0.509954	0.60228	0.946978	0.999939	0.999994	0.949273	0.854164	0.661059	0.792287	0.999967	0.961605	0.999951	0.636485	0.27266	0.156953	0.999963	0.805638	0.950269	0.801854	0.172718	0.861723	0.999996	0.740575	0.999996
Zfand1	2310008M20RIK	#N/A	#N/A	0.729821	0.493775	0.943992	0.456726	0.787911	0.979979	0.683697	0.999925	0.922549	0.995037	0.999936	0.999956	0.999914	0.996566	0.312641	0.277037	0.349392	0.353397	0.345464	0.309663	0.372762	0.999996	0.749075	0.644608	0.946978	0.999939	0.938581	0.949472	0.962738	0.6647	0.483906	0.999967	0.961605	0.999951	0.335125	0.29993	0.368831	0.999963	0.805638	0.950269	0.602405	0.575278	0.772916	0.999996	0.92531	0.986536
Fggy	2310009E04RIK	#N/A	#N/A	0.715786	0.175781	0.685769	0.74113	0.649939	0.28025	0.151702	0.999925	0.809114	0.828406	0.999936	0.999956	0.907207	0.996566	0.29627	0.235679	0.295029	0.29581	0.335477	0.346193	0.350545	0.999996	0.708344	0.611286	0.946978	0.999939	0.938581	0.949273	0.908816	0.718696	0.0346622	0.999967	0.971985	0.999951	0.320915	0.293093	0.327738	0.999963	0.805638	0.950269	0.659952	0.196325	0.546186	0.999996	0.748649	0.960815
Mapk1ip1	2310009E07RIK	#N/A	#N/A	0.304351	0.0921652	0.090423	0.313172	0.724667	0.305574	0.74802	0.999925	0.724463	0.249525	0.999936	0.999956	0.907207	0.996566	0.986567	0.0414614	0.00756768	0.493462	0.164458	0.4686	0.491996	0.999996	0.394944	0.101255	0.963213	0.999939	0.953346	0.958875	0.687032	0.684329	0.681843	0.999967	0.961605	0.999951	0.408803	0.413713	0.998877	0.999963	0.810066	0.999961	0.216684	0.021278	0.232934	0.999996	0.33291	0.932819
Slc66a2	2310009N05RIK	#N/A	#N/A	0.606225	0.733613	0.210086	0.409052	0.966417	0.720679	0.791143	0.999925	0.962967	0.424953	0.999936	0.999956	0.973675	0.997255	0.642132	0.46961	0.789674	0.473636	0.373994	0.460185	0.834927	0.999996	0.833463	0.907257	0.963213	0.999939	0.953346	0.994189	0.674037	0.599511	0.4134	0.999967	0.961605	0.999951	0.362751	0.327024	0.531745	0.999963	0.805638	0.960042	0.755222	0.990928	0.710592	0.999996	0.999976	0.964735
Fastkd3	2310010B21RIK	#N/A	#N/A	0.769039	0.765817	0.764759	0.373537	0.761116	0.142873	0.768212	0.999925	0.962967	0.871557	0.999936	0.999956	0.906279	0.996566	0.334265	0.340941	0.336008	0.338178	0.339783	0.745241	0.751068	0.999996	0.767168	0.636064	0.946978	0.999939	0.971638	0.973317	0.675643	0.220683	0.674379	0.999967	0.947682	0.999951	0.152019	0.628692	0.621569	0.999963	0.903977	0.960042	0.994175	0.407985	0.408744	0.999996	0.82743	0.932819
Mfsd3	2310010G13RIK	#N/A	#N/A	0.371786	0.370576	0.73416	0.368103	0.766703	0.856833	0.759401	0.999925	0.864592	0.858994	0.999936	0.999956	0.999914	0.996566	0.427012	0.689971	0.721659	0.779177	0.822705	0.77348	0.771102	0.999996	0.925142	0.882395	0.985569	0.999939	0.971638	0.973317	0.396091	0.441768	0.389704	0.999967	0.957995	0.999951	0.48707	0.939187	0.994227	0.999963	0.999992	0.999961	0.680371	0.622258	0.681651	0.999996	0.92531	0.960815
Stimate	2310014H19RIK	#N/A	#N/A	0.364085	0.365702	0.268471	0.745902	0.903031	0.728299	0.344736	0.999925	0.862155	0.488045	0.999936	0.999956	0.973675	0.996566	0.301384	0.259406	0.608202	0.215673	0.81076	0.891518	0.53824	0.999996	0.736967	0.814792	0.946978	0.999939	0.999994	0.958875	0.454765	0.682675	0.359188	0.999967	0.961605	0.999951	0.349312	0.461618	0.178544	0.999963	0.841827	0.950269	0.593367	0.399361	0.67174	0.999996	0.82743	0.960815
Ccdc90b	2310015N07RIK	#N/A	#N/A	0.319093	0.346459	0.379257	0.332005	0.374201	0.350243	0.304874	0.999925	0.861222	0.585151	0.999936	0.999956	0.907207	0.996566	0.328542	0.325853	0.321988	0.333798	0.364921	0.372894	0.304156	0.999996	0.763416	0.626258	0.946978	0.999939	0.938581	0.949273	0.304634	0.943102	0.588281	0.999967	0.999993	0.999951	0.605756	0.507675	0.65602	0.999963	0.872939	0.960042	0.352335	0.354731	0.325082	0.999996	0.817341	0.932819
Cmbl	2310016A09RIK	#N/A	#N/A	0.934711	0.462184	0.950294	0.960175	0.214543	0.728455	0.192199	0.999925	0.915781	0.998578	0.999936	0.999956	0.973675	0.996566	0.34423	0.853128	0.935512	0.247547	0.796255	0.557483	0.806084	0.999996	0.972049	0.995089	0.946978	0.999939	0.956624	0.984127	0.333483	0.430298	0.35736	0.999967	0.950837	0.999951	0.598151	0.557537	0.484912	0.999963	0.896181	0.960042	0.433471	0.792571	0.361979	0.999996	0.972336	0.932819
Hilpda	2310016C08RIK	#N/A	#N/A	0.24214	0.248636	0.611971	0.0270617	0.548028	0.563069	0.584847	0.999925	0.861222	0.771651	0.999936	0.999956	0.9475	0.996566	0.445749	0.0397214	0.9221	0.0509357	0.182818	0.954759	0.178775	0.999996	0.387601	0.987037	0.946978	0.999939	0.999994	0.949273	0.716688	0.713847	0.281171	0.999967	0.969647	0.999951	0.674197	0.129425	0.641477	0.999963	0.759661	0.960042	0.160713	0.169522	0.0322013	0.999996	0.740575	0.932819
Gpx8	2310016C16RIK	#N/A	#N/A	0.842328	0.298895	0.0273385	0.297876	0.30531	0.0272982	0.301391	0.999925	0.861222	0.109736	0.999936	0.999956	0.676139	0.996566	0.372785	0.0333623	0.989024	0.665282	0.986507	0.19349	0.671194	0.999996	0.361585	0.999954	0.984983	0.999939	0.938581	0.973317	0.402494	0.397031	0.163732	0.999967	0.947682	0.999951	0.510662	0.522366	0.536304	0.999963	0.881134	0.960042	0.551582	0.0269282	0.995571	0.999996	0.370552	0.999996
Ost4	2310016E02RIK	#N/A	#N/A	0.962715	0.462839	0.61907	0.218325	0.353138	0.846191	0.344519	0.999925	0.915897	0.777456	0.999936	0.999956	0.999812	0.996566	0.884424	0.904049	0.195393	0.953062	0.488992	0.559328	0.0756587	0.999996	0.998466	0.511179	0.999974	0.999939	0.956624	0.949273	0.527062	0.507454	0.83329	0.999967	0.961605	0.999951	0.729548	0.657134	0.275356	0.999963	0.903977	0.950269	0.502912	0.709435	0.144406	0.999996	0.934271	0.932819
Apol9b	2310016F22RIK	#N/A	#N/A	0.425039	0.731814	0.00676008	0.524503	0.0373089	0.634557	0.576659	0.999925	0.962967	0.0393074	0.999936	0.999956	0.973618	0.996566	0.936092	0.0505829	0.50764	0.893159	0.416278	0.147502	0.934571	0.999996	0.425811	0.763967	0.999974	0.999939	0.938581	0.999915	0.0990322	0.938138	0.488257	0.999967	0.999993	0.999951	0.697237	0.0791522	0.908837	0.999963	0.709424	0.999961	0.2122	0.4433	0.940672	0.999996	0.84786	0.999996
Cox14	2310016M24RIK	#N/A	#N/A	0.227677	0.914141	0.297392	0.503023	0.196834	0.656419	0.233774	0.999925	0.999976	0.518041	0.999936	0.999956	0.973675	0.996566	0.143184	0.481953	0.264769	0.197527	0.400595	0.845486	0.669982	0.999996	0.840044	0.585535	0.946978	0.999939	0.995647	0.973317	0.933914	0.749136	0.615253	0.999967	0.985776	0.999951	0.606153	0.472504	0.483174	0.999963	0.848212	0.960042	0.154424	0.747768	0.283672	0.999996	0.950332	0.932819
Rnf113a2	2310020H19RIK	#N/A	#N/A	0.175477	0.476035	0.0262945	0.831123	0.636255	0.0322653	0.22189	0.999925	0.922549	0.107217	0.999936	0.999956	0.688295	0.996566	0.447932	0.941868	0.517266	0.617636	0.33308	0.185605	0.39135	0.999996	0.999842	0.768692	0.978415	0.999939	0.938581	0.950709	0.597151	0.0979126	0.549054	0.999967	0.947682	0.999951	0.902526	0.468742	0.835053	0.999963	0.846361	0.999961	0.103521	0.178791	0.194642	0.999996	0.740575	0.932819
Iscu	2310020H20RIK	#N/A	#N/A	0.685636	0.412571	0.655193	0.899977	0.44151	0.325948	0.728439	0.999925	0.888194	0.806052	0.999936	0.999956	0.907207	0.996566	0.85381	0.904878	0.300181	0.828643	0.879686	0.786465	0.988719	0.999996	0.998828	0.612255	0.999974	0.999939	0.974468	0.999915	0.304677	0.122229	0.675939	0.999967	0.947682	0.999951	0.98009	0.767586	0.861312	0.999963	0.940245	0.999961	0.825733	0.92078	0.894373	0.999996	0.999976	0.999996
Mtfmt	2310020P08RIK	#N/A	#N/A	0.533802	0.223253	0.221082	0.538594	0.536968	0.998739	0.53977	0.999925	0.859591	0.434909	0.999936	0.999956	0.999914	0.996566	0.749185	0.742329	0.748179	0.748722	0.745322	0.335079	0.750152	0.999996	0.932672	0.89303	0.984983	0.999939	0.938581	0.973317	0.400542	0.405232	0.404861	0.999967	0.947682	0.999951	0.643262	0.644819	0.646218	0.999963	0.903977	0.960042	0.997209	0.379667	0.998968	0.999996	0.822966	0.999996
Zswim8	2310021P13RIK	#N/A	#N/A	0.553778	0.608411	0.633126	0.586776	0.590102	0.105726	0.584105	0.999925	0.93793	0.787932	0.999936	0.999956	0.874503	0.996566	0.9339	0.977039	0.970847	0.173829	0.193397	0.157624	0.977113	0.999996	0.999842	0.999954	0.946978	0.999939	0.938581	0.999915	0.974018	0.201916	0.998111	0.999967	0.947682	0.999951	0.391402	0.311816	0.329989	0.999963	0.805638	0.950269	0.333211	0.33127	0.350142	0.999996	0.817341	0.932819
2310022B05Rik	2310022B05RIK	#N/A	#N/A	0.948388	0.931333	0.174521	0.463782	0.742074	0.963924	0.46609	0.999925	0.999976	0.379212	0.999936	0.999956	0.999914	0.996566	0.679714	0.0290812	0.00818724	0.531425	0.991215	0.0264416	0.528889	0.999996	0.33925	0.10471	0.963213	0.999939	0.902034	0.958875	0.859384	0.929882	0.332931	0.999967	0.999993	0.999951	0.772614	0.00595321	0.396033	0.999963	0.270667	0.950269	0.771301	0.97588	0.997745	0.999996	0.999976	0.999996
Gpcpd1	2310032D16RIK	#N/A	#N/A	0.248781	0.256451	0.240378	0.209953	0.360556	0.146046	0.0780689	0.999925	0.861222	0.457122	0.999936	0.999956	0.907207	0.996566	0.407882	0.171587	0.0716334	0.090246	0.226001	0.235061	0.19956	0.999996	0.645025	0.318388	0.946978	0.999939	0.938581	0.949273	0.673248	0.569111	0.360998	0.999967	0.961605	0.999951	0.555393	0.778198	0.515538	0.999963	0.946412	0.960042	0.288652	0.186254	0.125147	0.999996	0.746074	0.932819
2310033P09Rik	2310033P09RIK	#N/A	#N/A	0.872984	0.378563	0.966062	0.272194	0.260322	0.379458	0.24494	0.999925	0.869552	0.999944	0.999936	0.999956	0.907207	0.996566	0.296278	0.580833	0.294622	0.362965	0.737447	0.185511	0.132804	0.999996	0.87236	0.611286	0.946978	0.999939	0.938581	0.949273	0.527552	0.999128	0.965386	0.999967	0.999993	0.999951	0.622571	0.588863	0.673149	0.999963	0.903977	0.960042	0.327532	0.186982	0.0943122	0.999996	0.746074	0.932819
Yipf4	2310034L04RIK	#N/A	#N/A	0.651808	0.166427	0.624651	0.624576	0.171992	0.16844	0.641296	0.999925	0.800507	0.781704	0.999936	0.999956	0.907207	0.996566	0.382366	0.373865	0.979474	0.366047	0.0848008	0.0850393	0.998191	0.999996	0.771072	0.999954	0.946978	0.999939	0.938581	0.999915	0.185091	0.995948	0.986025	0.999967	0.999993	0.999951	0.0786923	0.545863	0.52618	0.999963	0.889616	0.960042	0.535474	0.0755784	0.525717	0.999996	0.57276	0.960815
Relch	2310035C23RIK	#N/A	#N/A	0.991247	0.997391	0.998467	0.170826	0.189174	0.171243	0.997228	0.999925	0.999976	0.999944	0.999936	0.999956	0.907207	0.999982	0.917248	0.181338	0.990188	0.9981	0.159949	0.968226	0.171508	0.999996	0.657218	0.999954	0.999974	0.999939	0.999994	0.949273	0.352859	0.337954	0.335206	0.999967	0.947682	0.999951	0.289863	0.360865	0.336735	0.999963	0.805638	0.950269	0.360991	0.336163	0.337969	0.999996	0.817341	0.932819
Ap5s1	2310035K24RIK	#N/A	#N/A	0.317263	0.274165	8.77556e-07	0.260251	0.159759	0.515392	0.849464	0.999925	0.861222	3.37723e-05	0.999936	0.999956	0.9475	0.999982	0.334726	0.775425	0.015786	0.120793	0.145739	0.866132	0.805568	0.999996	0.932859	0.148436	0.946978	0.999939	0.999994	0.983865	0.805436	0.310567	0.580073	0.999967	0.947682	0.999951	0.765497	0.945187	0.290866	0.999963	0.999992	0.950269	0.0354088	0.676046	0.228722	0.999996	0.92531	0.932819
Tmem106b	2310036D22RIK	#N/A	#N/A	0.343769	0.708	0.816869	0.266957	0.89231	0.473457	0.453549	0.999925	0.962967	0.904054	0.999936	0.999956	0.944444	0.996566	0.195185	0.727854	0.898095	0.623564	0.639494	0.483214	0.156306	0.999996	0.932672	0.970921	0.981556	0.999939	0.953346	0.949273	0.467836	0.465488	0.804671	0.999967	0.961605	0.999951	0.229053	0.470944	0.515018	0.999963	0.846914	0.960042	0.549942	0.800126	0.180915	0.999996	0.974092	0.932819
Trir	2310036O22RIK	#N/A	#N/A	0.779406	0.60499	0.11939	0.3708	0.654047	0.768522	0.372327	0.999925	0.935663	0.301035	0.999936	0.999956	0.973675	0.996566	0.888251	0.344871	0.0276569	0.487549	0.567524	0.876354	0.291772	0.999996	0.767412	0.199346	0.963213	0.999939	0.999994	0.949273	0.887347	0.850847	0.998054	0.999967	0.999993	0.999951	0.7267	0.376273	0.766903	0.999963	0.807921	0.986806	0.655109	0.618778	0.278123	0.999996	0.92531	0.932819
Kansl2	2310037I24RIK	#N/A	#N/A	0.545039	0.583757	0.535279	0.953998	0.999157	0.983225	0.564857	0.999925	0.932283	0.715755	0.999936	0.999956	0.999914	0.996566	0.563927	0.276997	0.934443	0.94132	0.99162	0.588014	0.587618	0.999996	0.749075	0.994803	0.999974	0.999939	0.959087	0.964674	0.652832	0.695745	0.700498	0.999967	0.962584	0.999951	0.684088	0.248879	0.736189	0.999963	0.805638	0.97732	0.686878	0.704337	0.672854	0.999996	0.930842	0.960815
2310039H08Rik	2310039H08RIK	#N/A	#N/A	0.790006	0.576415	0.05437	0.882534	0.895269	0.753633	0.818905	0.999925	0.930237	0.179217	0.999936	0.999956	0.973675	0.999982	0.983504	0.639278	0.331807	0.836035	0.858675	0.582287	0.815783	0.999996	0.904977	0.631957	0.999974	0.999939	0.959087	0.988419	0.786418	0.866979	0.955838	0.999967	0.999993	0.999951	0.869306	0.945979	0.982803	0.999963	0.999992	0.999961	0.922306	0.52962	0.78532	0.999996	0.915367	0.990672
Fam83g	2310040C09RIK	#N/A	#N/A	0.770209	0.76829	0.777863	0.143268	0.751046	0.3686	0.3691	0.999925	0.962967	0.87621	0.999936	0.999956	0.907207	0.996566	0.770664	0.369434	0.779613	0.743762	0.750108	0.136867	0.364507	0.999996	0.769709	0.901588	0.984983	0.999939	0.938581	0.949273	0.985248	0.384764	0.0936725	0.999967	0.947682	0.999951	0.984154	0.0902782	0.368842	0.999963	0.721568	0.950269	0.68202	0.681895	0.694242	0.999996	0.92531	0.960815
Nudt16	2310041H06RIK	#N/A	#N/A	0.628431	0.898777	7.45488e-06	0.477196	0.821318	0.125374	0.14656	0.999925	0.999976	0.000191924	0.999936	0.999956	0.891689	0.996566	0.369333	0.0382722	0.0259054	0.197901	0.864627	0.687403	0.343664	0.999996	0.382878	0.193053	0.946978	0.999939	0.971638	0.949273	0.869578	0.369017	0.629728	0.999967	0.947682	0.999951	0.490006	0.113216	0.82035	0.999963	0.753337	0.999961	0.573585	0.191111	0.0957278	0.999996	0.748649	0.932819
Prelid3b	2310042G06RIK	#N/A	#N/A	0.114909	0.585167	0.00113632	0.37964	0.459828	0.0279305	0.0810489	0.999925	0.932283	0.010384	0.999936	0.999956	0.676139	0.996566	0.0666446	0.380071	0.116815	0.52734	0.645796	0.397815	0.0489968	0.999996	0.776151	0.406783	0.963213	0.999939	0.941272	0.949273	0.577763	0.0815122	0.561412	0.999967	0.947682	0.999951	0.364791	0.983116	0.373763	0.999963	0.999992	0.950269	0.0831239	0.190619	0.0518581	0.999996	0.748649	0.932819
Ccdc134	2310042L06RIK	#N/A	#N/A	0.345663	0.260209	0.366704	0.321394	0.335836	0.281146	0.320689	0.999925	0.861222	0.574446	0.999936	0.999956	0.907207	0.996566	0.968988	0.53828	0.162894	0.835633	0.816139	0.200684	0.819836	0.999996	0.856923	0.468128	0.999974	0.999939	0.938581	0.990597	0.347337	0.278213	0.327952	0.999967	0.947682	0.999951	0.899349	0.222467	0.776433	0.999963	0.787691	0.991592	0.836027	0.605933	0.987648	0.999996	0.92531	0.999996
Cipc	2310044G17RIK	#N/A	#N/A	0.240878	0.906117	0.875006	0.746117	0.728651	0.760069	0.698693	0.999925	0.999976	0.94776	0.999936	0.999956	0.973675	0.996566	0.310772	0.961529	0.252135	0.17701	0.538792	0.617111	0.543573	0.999996	0.999842	0.571451	0.946978	0.999939	0.967613	0.958875	0.582658	0.90166	0.966637	0.999967	0.999993	0.999951	0.777622	0.702346	0.180007	0.999963	0.906433	0.950269	0.257361	0.749733	0.593121	0.999996	0.950951	0.960815
Emc10	2310044H10RIK	#N/A	#N/A	0.671673	0.743805	1.84368e-05	0.821916	0.607113	0.157863	0.00487616	0.999925	0.962967	0.000404851	0.999936	0.999956	0.907207	0.996566	0.194282	0.0790064	0.77617	0.000149897	0.961027	0.450534	0.676228	0.999996	0.492372	0.900386	0.325474	0.999939	0.953346	0.973317	0.954976	0.494423	0.0988635	0.999967	0.961605	0.999951	0.206995	0.295172	0.00104206	0.999963	0.805638	0.425464	0.443158	0.159776	0.0157796	0.999996	0.736338	0.932819
Sel1l3	2310045A20RIK	#N/A	#N/A	0.316259	0.674269	0.000277517	0.856332	0.317006	0.785049	0.719418	0.999925	0.962967	0.00354785	0.999936	0.999956	0.975887	0.996566	0.216348	0.157964	0.705319	0.459811	0.339091	0.208987	0.881335	0.999996	0.634355	0.874439	0.963213	0.999939	0.938581	0.999915	0.999238	0.676453	0.914271	0.999967	0.961605	0.999951	0.854777	0.100115	0.57334	0.999963	0.734145	0.960042	0.09262	0.897323	0.638381	0.999996	0.999976	0.960815
Alkbh7	2310045B01RIK	#N/A	#N/A	0.139215	0.561415	0.244069	0.686765	0.215231	0.359272	0.581605	0.999925	0.925135	0.461491	0.999936	0.999956	0.907207	0.996566	0.49504	0.782638	0.152449	0.456675	0.062956	0.964551	0.879121	0.999996	0.933819	0.453788	0.963213	0.999939	0.999994	0.999915	0.853583	0.275725	0.912671	0.999967	0.947682	0.999951	0.401518	0.872782	0.681246	0.999963	0.997427	0.960042	0.0787652	0.819644	0.524478	0.999996	0.983505	0.960815
Ahnak	2310047C17RIK	#N/A	#N/A	0.386259	0.158325	2.26029e-07	0.72475	0.816827	0.451859	0.730648	0.999925	0.800507	1.06557e-05	0.999936	0.999956	0.939109	0.996566	0.833868	0.110983	0.269984	0.776205	0.473774	0.907317	0.771413	0.999996	0.559136	0.59038	0.985434	0.999939	0.999994	0.973317	0.480219	0.663072	0.654049	0.999967	0.961605	0.999951	0.59405	0.389871	0.740738	0.999963	0.807921	0.978574	0.620732	0.103578	0.995121	0.999996	0.641693	0.999996
Tlcd3a	2310047D13RIK	#N/A	#N/A	0.208941	0.836662	0.111158	0.542729	0.475496	0.917586	0.869708	0.999925	0.98441	0.287066	0.999936	0.999956	0.999914	0.999982	0.207963	0.953175	0.495826	0.952856	0.390562	0.958706	0.441178	0.999996	0.999842	0.759351	0.999974	0.999939	0.999994	0.958875	0.657539	0.804499	0.721538	0.999967	0.999993	0.999951	0.704402	0.994882	0.511898	0.999963	0.999992	0.960042	0.219645	0.948193	0.625582	0.999996	0.999976	0.960815
Txndc15	2310047H23RIK	#N/A	#N/A	0.66395	0.631441	0.00569544	0.624874	0.557455	0.566597	0.645691	0.999925	0.949405	0.0346021	0.999936	0.999956	0.947799	0.996566	0.392768	0.787866	0.152264	0.411425	0.816825	0.865821	0.851132	0.999996	0.935614	0.453788	0.960018	0.999939	0.999994	0.999915	0.920236	0.493338	0.984682	0.999967	0.961605	0.999951	0.665805	0.762684	0.660722	0.999963	0.937317	0.960042	0.440382	0.942967	0.473063	0.999996	0.999976	0.960815
Sfi1	2310047I15RIK	#N/A	#N/A	0.608123	0.532118	0.629017	0.567137	0.0953589	0.61234	0.60158	0.999925	0.922549	0.785193	0.999936	0.999956	0.964296	0.996566	0.325385	0.338036	0.361525	0.339244	0.280546	0.31363	0.344108	0.999996	0.765791	0.651496	0.946978	0.999939	0.938581	0.949273	0.191736	0.942661	0.975636	0.999967	0.999993	0.999951	0.383269	0.649122	0.929825	0.999963	0.903977	0.999961	0.309398	0.332332	0.348082	0.999996	0.817341	0.932819
Borcs6	2310047M10RIK	#N/A	#N/A	0.930046	0.598911	0.434377	0.899265	0.890058	0.521777	0.433248	0.999925	0.9341	0.634277	0.999936	0.999956	0.9475	0.996566	0.984561	0.39902	0.0295559	0.327482	0.802077	0.337338	0.756695	0.999996	0.789459	0.206615	0.946978	0.999939	0.938581	0.973317	0.971822	0.417689	0.524878	0.999967	0.947682	0.999951	0.846401	0.20459	0.358672	0.999963	0.776775	0.950269	0.873778	0.935242	0.643329	0.999996	0.999976	0.960815
Tsfm	2310050B20RIK	#N/A	#N/A	0.891656	0.807036	0.13031	0.399255	0.25237	0.39978	0.640258	0.999925	0.973083	0.317213	0.999936	0.999956	0.910265	0.996566	0.184805	0.965135	0.513973	0.831012	0.91128	0.596257	0.881869	0.999996	0.999842	0.766851	0.999974	0.999939	0.959087	0.999915	0.47959	0.450169	0.364425	0.999967	0.961605	0.999951	0.336765	0.744669	0.965365	0.999963	0.928064	0.999961	0.368437	0.672034	0.789302	0.999996	0.92531	0.99103
Fam162a	2310056P07RIK	#N/A	#N/A	0.939611	0.203493	0.172063	0.670693	0.548797	0.884792	0.570421	0.999925	0.839242	0.37584	0.999936	0.999956	0.999914	0.996566	0.778628	0.456386	0.552196	0.865229	0.764555	0.606747	0.990761	0.999996	0.828844	0.782989	0.999974	0.999939	0.962186	0.999915	0.593194	0.265526	0.434939	0.999967	0.947682	0.999951	0.985592	0.820141	0.859074	0.999963	0.96855	0.999961	0.738618	0.470827	0.927494	0.999996	0.872122	0.999996
Tubb6	2310057H16RIK	#N/A	#N/A	0.759325	0.350059	0.348135	0.403549	0.74928	0.839817	0.751314	0.999925	0.861222	0.558723	0.999936	0.999956	0.997783	0.996566	0.781638	0.383545	0.135981	0.758609	0.771181	0.762289	0.37846	0.999996	0.777727	0.433843	0.984983	0.999939	0.971638	0.949775	0.671609	0.617496	0.723269	0.999967	0.961605	0.999951	0.692073	0.689226	0.686836	0.999963	0.903977	0.960042	0.992313	0.411017	0.405464	0.999996	0.828138	0.932819
Camsap3	2310057J16RIK	#N/A	#N/A	0.757741	0.123122	0.347383	0.74802	0.350766	0.350912	0.749748	0.999925	0.750937	0.558235	0.999936	0.999956	0.907207	0.996566	0.999011	0.178726	0.0479135	0.994752	0.496619	0.498431	0.493282	0.999996	0.654816	0.261302	0.999974	0.999939	0.953346	0.958875	0.334219	0.0624668	0.998569	0.999967	0.947682	0.999951	0.536099	0.0759794	0.536099	0.999963	0.707439	0.960042	0.687155	0.686644	0.682558	0.999996	0.92531	0.960815
Wwtr1	2310058J06RIK	#N/A	#N/A	0.984015	0.54323	0.989624	0.550361	0.235063	0.548173	0.550739	0.999925	0.922549	0.999944	0.999936	0.999956	0.9475	0.996566	0.235219	0.232358	0.995079	0.990742	0.985358	0.995748	0.991199	0.999996	0.706921	0.999954	0.999974	0.999939	0.999994	0.999915	0.397834	0.995808	0.406807	0.999967	0.999993	0.999951	0.398129	0.404269	0.987335	0.999963	0.807921	0.999961	0.411809	0.399839	0.999679	0.999996	0.82743	0.999996
Ctu2	2310061F22RIK	#N/A	#N/A	0.993232	0.989887	0.98344	0.163165	0.184919	0.184904	0.97145	0.999925	0.999976	0.999944	0.999936	0.999956	0.907207	0.999982	0.106798	0.606383	0.590731	0.568492	0.578646	0.569603	0.541228	0.999996	0.887231	0.802182	0.964063	0.999939	0.95684	0.958875	0.349966	0.348499	0.340513	0.999967	0.947682	0.999951	0.193232	0.973968	0.980137	0.999963	0.999992	0.999961	0.354582	0.356037	0.315505	0.999996	0.817341	0.932819
Ccdc115	2310061I09RIK	#N/A	#N/A	0.996319	0.480311	0.983704	0.457926	0.99296	0.465865	0.461089	0.999925	0.922549	0.999944	0.999936	0.999956	0.942152	0.996566	0.744081	0.747049	0.359844	0.716959	0.746896	0.731244	0.713481	0.999996	0.932672	0.650565	0.984983	0.999939	0.971638	0.973317	0.992225	0.304232	0.28993	0.999967	0.947682	0.999951	0.673733	0.665821	0.636211	0.999963	0.903977	0.960042	0.997715	0.987135	0.997136	0.999996	0.999976	0.999996
Ifi27l2a	2310061N23RIK	#N/A	#N/A	0.707702	0.120338	0.14586	0.691268	0.193994	0.724549	0.62098	0.999925	0.748389	0.339778	0.999936	0.999956	0.973675	0.996566	0.2944	0.147071	0.120747	0.21759	0.359005	0.268779	0.528578	0.999996	0.61896	0.412435	0.946978	0.999939	0.938581	0.958875	0.348506	0.285334	0.95617	0.999967	0.947682	0.999951	0.646944	0.231635	0.0480872	0.999963	0.800336	0.950269	0.327998	0.205525	0.352539	0.999996	0.753872	0.932819
Psme3ip1	2310065K24RIK	#N/A	#N/A	0.504541	0.513065	0.132375	0.997534	0.591592	0.545014	0.896416	0.999925	0.922549	0.319989	0.999936	0.999956	0.9475	0.999982	0.953979	0.540539	0.779621	0.443616	0.826117	0.580976	0.357788	0.999996	0.856923	0.901588	0.963213	0.999939	0.959087	0.949273	0.38733	0.366296	0.92307	0.999967	0.947682	0.999951	0.757927	0.205829	0.0734521	0.999963	0.776775	0.950269	0.928436	0.973238	0.931058	0.999996	0.999976	0.999996
Ripor1	2310066E14RIK	#N/A	#N/A	0.154298	0.994541	0.461938	0.467357	0.98964	0.991083	0.0353163	0.999925	0.999976	0.660063	0.999936	0.999956	0.999914	0.996566	0.349374	0.755671	0.128485	0.344244	0.766637	0.767504	0.125366	0.999996	0.932672	0.423306	0.946978	0.999939	0.971638	0.949273	0.297921	0.997492	0.301073	0.999967	0.999993	0.999951	0.680958	0.698748	0.697919	0.999963	0.905232	0.960137	0.336313	0.990221	0.061497	0.999996	0.999976	0.932819
Taco1	2310066I18RIK	#N/A	#N/A	0.307147	0.312366	0.729558	0.743338	0.733199	0.0935002	0.750911	0.999925	0.861222	0.856344	0.999936	0.999956	0.850689	0.996566	0.350375	0.122806	0.348792	0.75271	0.745639	0.345546	0.745715	0.999996	0.579564	0.644608	0.984983	0.999939	0.938581	0.973317	0.640368	0.636401	0.661307	0.999967	0.961605	0.999951	0.694189	0.690899	0.68287	0.999963	0.904336	0.960042	0.328175	0.0614551	0.994208	0.999996	0.544661	0.999996
Rpf1	2310066N05RIK	#N/A	#N/A	0.814274	0.794739	0.0576578	0.797934	0.17591	0.746711	0.810263	0.999925	0.967675	0.185563	0.999936	0.999956	0.973675	0.999982	0.764148	0.40701	0.454029	0.785766	0.397578	0.37255	0.79818	0.999996	0.794104	0.731344	0.98815	0.999939	0.938581	0.98176	0.204137	0.637481	0.688268	0.999967	0.961605	0.999951	0.650367	0.165715	0.663802	0.999963	0.775838	0.960042	0.478664	0.968498	0.992011	0.999996	0.999976	0.999996
Tmem94	2310067B10RIK	#N/A	#N/A	0.971087	0.96335	0.00955211	0.937444	0.68855	0.637672	0.369416	0.999925	0.999976	0.0512657	0.999936	0.999956	0.973618	0.996566	0.949334	0.950546	0.228845	0.714817	0.616236	0.562268	0.645307	0.999996	0.999842	0.547016	0.984983	0.999939	0.956624	0.973317	0.773228	0.736916	0.442123	0.999967	0.981773	0.999951	0.654611	0.611437	0.93975	0.999963	0.903977	0.999961	0.780603	0.74186	0.600709	0.999996	0.94876	0.960815
Endod1	2310067E08RIK	#N/A	#N/A	0.119029	0.0996422	0.000252954	0.383775	0.920002	0.77924	0.327794	0.999925	0.729856	0.00329591	0.999936	0.999956	0.974002	0.996566	0.348738	0.399973	0.291418	0.376969	0.291009	0.326939	0.310209	0.999996	0.789582	0.608595	0.946978	0.999939	0.938581	0.949273	0.207132	0.233548	0.923961	0.999967	0.947682	0.999951	0.325628	0.368245	0.348792	0.999963	0.805674	0.950269	0.315184	0.245862	0.269943	0.999996	0.798116	0.932819
Slc25a23	2310067G05RIK	#N/A	#N/A	0.175175	0.934129	0.852209	0.308129	0.855526	0.572629	0.523064	0.999925	0.999976	0.931043	0.999936	0.999956	0.948579	0.996566	0.30166	0.0238569	0.849125	0.946661	0.0187514	0.0625007	0.120536	0.999996	0.313033	0.943977	0.999974	0.999939	0.938581	0.949273	0.414073	0.654918	0.789245	0.999967	0.961605	0.999951	0.0368337	0.0134112	0.298845	0.999963	0.386848	0.950269	0.276501	0.731433	0.24515	0.999996	0.94527	0.932819
Dus4l	2310069P03RIK	#N/A	#N/A	0.474081	0.685528	0.508923	0.82284	0.687866	0.96313	0.232652	0.999925	0.962967	0.698506	0.999936	0.999956	0.999914	0.996566	0.439872	0.348167	0.805337	0.177875	0.647255	0.655126	0.776296	0.999996	0.767412	0.915813	0.946978	0.999939	0.971638	0.973317	0.839605	0.818339	0.36609	0.999967	0.999993	0.999951	0.826488	0.343452	0.263839	0.999963	0.805638	0.950269	0.384365	0.723283	0.444265	0.999996	0.941542	0.950288
Nr2c2ap	2310073E15RIK	#N/A	#N/A	0.532511	0.997748	0.501943	0.0671962	0.992766	0.516337	0.206954	0.999925	0.999976	0.693373	0.999936	0.999956	0.9475	0.996566	0.551044	0.984025	0.543514	0.55527	0.239998	0.549647	0.987314	0.999996	0.999842	0.781968	0.963213	0.999939	0.953346	0.999915	0.622151	0.611953	0.0237471	0.999967	0.961605	0.999951	0.201556	0.671116	0.65662	0.999963	0.903977	0.960042	0.692035	0.677348	0.699175	0.999996	0.92531	0.961089
Plin5	2310076L09RIK	#N/A	#N/A	0.171784	0.827312	0.0279797	0.91298	0.141633	0.752552	0.717729	0.999925	0.981521	0.111539	0.999936	0.999956	0.973675	0.996566	0.240983	0.651176	0.133623	0.893653	0.0978862	0.936268	0.736617	0.999996	0.909235	0.430569	0.999974	0.999939	0.999994	0.973317	0.634231	0.668806	0.274576	0.999967	0.961605	0.999951	0.0614649	0.157978	0.432006	0.999963	0.775838	0.954223	0.163196	0.790091	0.814182	0.999996	0.971088	0.999471
Ntpcr	2310079N02RIK	#N/A	#N/A	0.846382	0.0439104	6.76877e-05	0.0453153	0.342607	0.955507	0.262303	0.999925	0.543179	0.00114076	0.999936	0.999956	0.999914	0.996566	0.111165	0.039982	0.0308442	0.71595	0.558158	0.768234	0.0159515	0.999996	0.387601	0.211061	0.984983	0.999939	0.971638	0.871391	0.590223	0.142795	0.509901	0.999967	0.947682	0.999951	0.163412	0.129756	0.172897	0.999963	0.760407	0.950269	0.429907	0.172814	0.0386013	0.999996	0.740575	0.932819
Lamtor1	2400001E08RIK	#N/A	#N/A	0.17404	0.375092	0.38585	0.379823	0.566029	0.481713	0.33682	0.999925	0.867212	0.590318	0.999936	0.999956	0.947436	0.996566	0.799516	0.820477	0.632196	0.0408098	0.246143	0.988515	0.99893	0.999996	0.954007	0.830397	0.946978	0.999939	0.999994	0.999915	0.253272	0.346827	0.960057	0.999967	0.947682	0.999951	0.366074	0.87686	0.186473	0.999963	0.999188	0.950269	0.476651	0.868079	0.112788	0.999996	0.999976	0.932819
Tmed9	2400003B06RIK	#N/A	#N/A	0.844979	0.543534	0.000807004	0.972909	0.89324	0.653761	0.857035	0.999925	0.922549	0.00798025	0.999936	0.999956	0.973675	0.999982	0.513874	0.674932	0.0312953	0.461356	0.793679	0.542523	0.628754	0.999996	0.91774	0.21241	0.963213	0.999939	0.953346	0.973317	0.969102	0.507029	0.926461	0.999967	0.961605	0.999951	0.503803	0.453075	0.374628	0.999963	0.83567	0.950269	0.791523	0.897877	0.863636	0.999996	0.999976	0.999996
Ist1	2400003C14RIK	#N/A	#N/A	0.601064	0.0375279	0.159881	0.453006	0.870398	0.960678	0.0662926	0.999925	0.516944	0.360081	0.999936	0.999956	0.999914	0.996566	0.809709	0.030229	0.886531	0.237124	0.917406	0.809914	0.909674	0.999996	0.347087	0.964564	0.946978	0.999939	0.982846	0.999915	0.625039	0.129783	0.0735945	0.999967	0.947682	0.999951	0.925396	0.103439	0.37764	0.999963	0.741341	0.950269	0.8036	0.159776	0.438907	0.999996	0.736338	0.947929
Suds3	2400003N08RIK	#N/A	#N/A	0.768861	0.0905893	0.970088	0.425022	0.37156	0.719944	0.0376213	0.999925	0.720157	0.999944	0.999936	0.999956	0.973675	0.996566	0.163872	0.793351	0.720152	0.142624	0.937663	0.0132698	0.0767375	0.999996	0.9381	0.881708	0.946978	0.999939	0.842973	0.949273	0.68245	0.358665	0.366273	0.999967	0.947682	0.999951	0.262026	0.0403009	0.804277	0.999963	0.611558	0.999961	0.390652	0.141746	0.0441767	0.999996	0.714927	0.932819
Psmd6	2400006A19RIK	#N/A	#N/A	0.316895	0.318773	0.3142	0.733995	0.749467	0.730066	0.744089	0.999925	0.861222	0.53288	0.999936	0.999956	0.973675	0.996566	0.753924	0.763899	0.141852	0.372084	0.756543	0.372399	0.768499	0.999996	0.932672	0.442013	0.946978	0.999939	0.938581	0.973317	0.300049	0.292458	0.991509	0.999967	0.947682	0.999951	0.998068	0.406042	0.40813	0.999963	0.807921	0.950269	0.662316	0.675957	0.672582	0.999996	0.92531	0.960815
Rpain	2400006N03RIK	#N/A	#N/A	0.572507	0.565591	0.569046	0.594878	0.56498	0.584107	0.0901954	0.999925	0.92607	0.735671	0.999936	0.999956	0.95081	0.996566	0.680908	0.678967	0.236086	0.670427	0.675144	0.664916	0.04922	0.999996	0.920495	0.553412	0.984983	0.999939	0.971638	0.949273	0.332351	0.339802	0.309191	0.999967	0.947682	0.999951	0.614707	0.607653	0.149135	0.999963	0.903977	0.950269	0.994584	0.986749	0.181399	0.999996	0.999976	0.932819
Rassf7	2400009B11RIK	#N/A	#N/A	0.739018	0.70019	0.159556	0.66576	0.671062	0.662888	0.227469	0.999925	0.962967	0.359566	0.999936	0.999956	0.973675	0.996566	0.329069	0.0566836	0.237604	0.894417	0.385092	0.0643614	0.0727774	0.999996	0.443767	0.555569	0.999974	0.999939	0.938581	0.949273	0.653287	0.626657	0.640785	0.999967	0.961605	0.999951	0.232737	0.0201509	0.270729	0.999963	0.459234	0.950269	0.933957	0.963248	0.149154	0.999996	0.999976	0.932819
2400010D15Rik	2400010D15RIK	#N/A	#N/A	0.898732	0.526009	6.41343e-07	0.153721	0.0321585	0.341726	0.530053	0.999925	0.922549	2.61654e-05	0.999936	0.999956	0.907207	0.996566	0.228462	0.129176	0.117964	0.663857	0.750661	0.196198	0.0568992	0.999996	0.591095	0.408813	0.984983	0.999939	0.938581	0.949273	0.0668517	0.201012	0.50249	0.999967	0.947682	0.999951	0.583551	0.0950035	0.156011	0.999963	0.723919	0.950269	0.204547	0.841758	0.207791	0.999996	0.994155	0.932819
Lmf1	2400010G15RIK	#N/A	#N/A	0.789196	0.193574	0.065548	0.3027	0.767954	0.228888	0.771148	0.999925	0.830655	0.202811	0.999936	0.999956	0.907207	0.996566	0.733683	0.0260123	0.16447	0.76466	0.352495	0.714237	0.279476	0.999996	0.321536	0.469752	0.984983	0.999939	0.971638	0.949273	0.984042	0.942244	0.344492	0.999967	0.999993	0.999951	0.330226	0.144675	0.290048	0.999963	0.775838	0.950269	0.701028	0.0973847	0.610326	0.999996	0.623312	0.960815
Rtf2	2410001C21RIK	#N/A	#N/A	0.483885	0.562937	0.00032637	0.54776	0.5476	0.162663	0.451468	0.999925	0.925135	0.00402093	0.999936	0.999956	0.907207	0.996566	0.362251	0.181548	0.111927	0.547599	0.416175	0.52099	0.451205	0.999996	0.657374	0.399266	0.963213	0.999939	0.953346	0.958875	0.383508	0.573295	0.917418	0.999967	0.961605	0.999951	0.25116	0.632031	0.917275	0.999963	0.903977	0.999961	0.941908	0.15739	0.327922	0.999996	0.735045	0.932819
Rpusd4	2410001E19RIK	#N/A	#N/A	0.166272	0.543565	1.66572e-05	0.350222	0.728475	0.620518	0.497053	0.999925	0.922549	0.000370859	0.999936	0.999956	0.968615	0.996566	0.451984	0.826294	0.0302896	0.328081	0.862714	0.904282	0.661783	0.999996	0.957639	0.209159	0.946978	0.999939	0.999994	0.973317	0.223858	0.43666	0.854035	0.999967	0.954558	0.999951	0.710898	0.828579	0.727587	0.999963	0.973127	0.971765	0.467256	0.937525	0.27034	0.999996	0.999976	0.932819
Tmem134	2410001H17RIK	#N/A	#N/A	0.237511	0.904945	0.140204	0.683044	0.45089	0.0272384	0.231529	0.999925	0.999976	0.332201	0.999936	0.999956	0.676139	0.996566	0.220857	0.204051	0.00183316	0.263254	0.442087	0.202002	0.550558	0.999996	0.679736	0.0444362	0.946978	0.999939	0.938581	0.95994	0.188517	0.145088	0.58064	0.999967	0.947682	0.999951	0.147999	0.996438	0.693319	0.999963	0.999992	0.960042	0.756456	0.100389	0.259644	0.999996	0.632402	0.932819
2410002F23Rik	2410002F23RIK	#N/A	#N/A	0.53041	0.998212	0.213238	0.996674	0.212486	0.522792	0.0668744	0.999925	0.999976	0.427852	0.999936	0.999956	0.9475	0.996566	0.307125	0.311335	0.316897	0.314614	0.730413	0.745741	0.308113	0.999996	0.762382	0.622902	0.946978	0.999939	0.971638	0.949273	0.196872	0.655354	0.19991	0.999967	0.961605	0.999951	0.298635	0.308755	0.991444	0.999963	0.805638	0.999961	0.657669	0.652422	0.197116	0.999996	0.92531	0.932819
Tepsin	2410002I01RIK	#N/A	#N/A	0.772625	0.368048	0.378751	0.369328	0.374069	0.762185	0.760692	0.999925	0.863076	0.58506	0.999936	0.999956	0.973675	0.996566	0.745186	0.32218	0.00522147	0.740745	0.323295	0.74157	0.740394	0.999996	0.763416	0.0808786	0.984983	0.999939	0.971638	0.973317	0.412217	0.402562	0.402746	0.999967	0.947682	0.999951	0.302079	0.299565	0.999704	0.999963	0.805638	0.999961	0.671381	0.672511	0.674757	0.999996	0.92531	0.960815
Trappc13	2410002O22RIK	#N/A	#N/A	0.769633	0.767672	0.357745	0.362496	0.368759	0.748355	0.362633	0.999925	0.962967	0.567799	0.999936	0.999956	0.973675	0.996566	0.222274	0.998973	0.53889	0.228201	0.534826	0.537178	0.538533	0.999996	0.999842	0.779608	0.946978	0.999939	0.953346	0.958875	0.395534	0.98543	0.999847	0.999967	0.999993	0.999951	0.193767	0.656678	0.666039	0.999963	0.903977	0.960042	0.675465	0.672893	0.219398	0.999996	0.92531	0.932819
Uqcc1	2410003P15RIK	#N/A	#N/A	0.212704	0.542917	0.201107	0.451374	0.409206	0.0471788	0.39862	0.999925	0.922549	0.412831	0.999936	0.999956	0.753453	0.996566	0.0677127	0.0762184	0.0362637	0.288836	0.778275	0.738366	0.558729	0.999996	0.486159	0.22849	0.946978	0.999939	0.971638	0.962047	0.722917	0.0411099	0.939447	0.999967	0.947682	0.999951	0.176291	0.0742478	0.673398	0.999963	0.707439	0.960042	0.205017	0.377133	0.32559	0.999996	0.820911	0.932819
Sac3d1	2410004C24RIK	#N/A	#N/A	0.996248	0.9872	0.170625	0.169755	0.969319	0.990007	0.160122	0.999925	0.999976	0.373902	0.999936	0.999956	0.999914	0.996566	0.33747	0.310578	0.295716	0.351253	0.314443	0.312907	0.328003	0.999996	0.762382	0.611286	0.946978	0.999939	0.938581	0.949273	0.982901	0.988682	0.174069	0.999967	0.999993	0.999951	0.332397	0.318536	0.345866	0.999963	0.805638	0.950269	0.68253	0.965901	0.687922	0.999996	0.999976	0.960815
Aldh16a1	2410004H02RIK	#N/A	#N/A	0.266935	0.788757	0.956148	0.787996	0.123796	0.199041	0.419507	0.999925	0.965229	0.999944	0.999936	0.999956	0.907207	0.996566	0.818478	0.680675	0.0728778	0.0339344	0.482829	0.0442062	0.29726	0.999996	0.921127	0.320785	0.946978	0.999939	0.938581	0.949273	0.128539	0.546739	0.750697	0.999967	0.961605	0.999951	0.57568	0.147181	0.0642023	0.999963	0.775838	0.950269	0.678516	0.157964	0.322952	0.999996	0.735738	0.932819
Haus8	2410004L22RIK	#N/A	#N/A	0.113149	0.128045	0.108287	0.118641	0.110023	0.119994	0.113058	0.999925	0.761741	0.282385	0.999936	0.999956	0.887139	0.996566	0.998651	0.17037	0.154543	0.993764	0.988395	0.161505	0.976005	0.999996	0.645025	0.456691	0.999974	0.999939	0.938581	0.999915	0.120987	0.133373	0.125235	0.999967	0.947682	0.999951	0.993569	0.175132	0.984991	0.999963	0.775838	0.999961	0.862321	0.682738	0.764133	0.999996	0.92531	0.982099
Kctd20	2410004N11RIK	#N/A	#N/A	0.161163	0.81067	0.119687	0.93711	0.152997	0.945667	0.937712	0.999925	0.975575	0.301579	0.999936	0.999956	0.999914	0.999982	0.580031	0.460637	0.517262	0.56954	0.0828197	0.623784	0.569127	0.999996	0.831105	0.768692	0.964433	0.999939	0.97029	0.962563	0.810083	0.170602	0.207434	0.999967	0.947682	0.999951	0.310111	0.306139	0.342279	0.999963	0.805638	0.950269	0.1659	0.87845	0.9997	0.999996	0.999976	0.999996
Zfp428	2410005H09RIK	#N/A	#N/A	0.494574	0.166643	0.489104	0.992579	0.483223	0.166559	0.994932	0.999925	0.800507	0.68217	0.999936	0.999956	0.907207	0.999982	0.318938	0.735227	0.105006	0.316674	0.327173	0.735022	0.323681	0.999996	0.932672	0.386608	0.946978	0.999939	0.971638	0.949273	0.335781	0.0620496	0.998346	0.999967	0.947682	0.999951	0.196578	0.652985	0.194024	0.999963	0.903977	0.950269	0.989788	0.999838	0.991257	0.999996	0.999976	0.999996
Svbp	2410005K17RIK	#N/A	#N/A	0.275135	0.00728965	0.0168272	0.507588	0.624547	0.918962	0.980558	0.999925	0.234589	0.0774551	0.999936	0.999956	0.999914	0.999982	0.424806	0.0283759	0.0627937	0.695881	0.795178	0.737608	0.319694	0.999996	0.334684	0.29912	0.984983	0.999939	0.971638	0.949273	0.207611	0.0379817	0.604485	0.999967	0.947682	0.999951	0.463053	0.187907	0.338228	0.999963	0.775838	0.950269	0.702324	0.0792034	0.666734	0.999996	0.574436	0.960815
Rsl1d1	2410005K20RIK	#N/A	#N/A	0.920246	0.014636	0.811798	0.0321352	0.623806	0.429342	0.907175	0.999925	0.345601	0.900681	0.999936	0.999956	0.925632	0.999982	0.669259	0.0129405	0.261504	0.0713104	0.943944	0.650755	0.774591	0.999996	0.217598	0.582107	0.946978	0.999939	0.971638	0.973317	0.70572	0.267751	0.189938	0.999967	0.947682	0.999951	0.762577	0.201618	0.34884	0.999963	0.775838	0.950269	0.758897	0.016514	0.0803332	0.999996	0.299193	0.932819
Ints11	2410006F12RIK	#N/A	#N/A	0.818692	0.60273	0.824798	0.915179	0.647502	0.662874	0.0521889	0.999925	0.935663	0.909995	0.999936	0.999956	0.973675	0.996566	0.343047	0.86394	0.0471859	0.171862	0.4752	0.247511	0.422082	0.999996	0.979079	0.259387	0.946978	0.999939	0.938581	0.958875	0.632671	0.952697	0.197989	0.999967	0.999993	0.999951	0.233976	0.33621	0.673708	0.999963	0.805638	0.960042	0.871928	0.502252	0.150588	0.999996	0.896938	0.932819
Castor1	2410008K03RIK	#N/A	#N/A	0.310354	0.727344	0.00396624	0.736447	0.311548	0.0955405	0.730552	0.999925	0.962967	0.0266774	0.999936	0.999956	0.851666	0.996566	0.143169	0.00480552	0.457155	0.13705	0.451179	0.455511	0.446993	0.999996	0.114626	0.734004	0.946978	0.999939	0.953346	0.958875	0.998676	0.385554	0.99594	0.999967	0.947682	0.999951	0.608701	0.0164951	0.124018	0.999963	0.416056	0.950269	0.129141	0.127381	0.600818	0.999996	0.688373	0.960815
Ndufa12	2410011G03RIK	#N/A	#N/A	0.570451	0.554423	0.317036	0.314419	0.98993	0.0469441	0.835388	0.999925	0.922549	0.535109	0.999936	0.999956	0.753156	0.999982	0.28961	0.644525	0.0190513	0.191583	0.641669	0.268934	0.999554	0.999996	0.907416	0.162742	0.946978	0.999939	0.938581	0.999915	0.709291	0.103722	0.605935	0.999967	0.947682	0.999951	0.30226	0.655654	0.371298	0.999963	0.903977	0.950269	0.66513	0.264756	0.347071	0.999996	0.816418	0.932819
Ermard	2410011O22RIK	#N/A	#N/A	0.74447	0.397223	5.36361e-05	0.855149	0.366114	0.15395	0.0899454	0.999925	0.877935	0.000942229	0.999936	0.999956	0.907207	0.996566	0.835901	0.387967	0.110062	0.150331	0.441982	0.179938	0.692752	0.999996	0.779483	0.395819	0.946978	0.999939	0.938581	0.973317	0.353452	0.650248	0.247432	0.999967	0.961605	0.999951	0.477183	0.71957	0.439649	0.999963	0.914432	0.95893	0.703414	0.145973	0.220866	0.999996	0.720977	0.932819
Mlec	2410014A08RIK	#N/A	#N/A	0.663295	0.467398	0.217574	0.746878	0.532977	0.649402	0.789317	0.999925	0.916352	0.430649	0.999936	0.999956	0.973675	0.996762	0.458518	0.535973	0.994721	0.655077	0.357799	0.608431	0.617272	0.999996	0.85673	0.999954	0.984983	0.999939	0.963833	0.972141	0.475757	0.85261	0.689968	0.999967	0.999993	0.999951	0.28356	0.943997	0.537666	0.999963	0.999992	0.960042	0.890291	0.393425	0.967642	0.999996	0.82743	0.999996
Tmco6	2410015B03RIK	#N/A	#N/A	0.788742	0.147023	3.10167e-07	0.018935	0.539341	0.0704112	0.0523677	0.999925	0.790108	1.38665e-05	0.999936	0.999956	0.824503	0.996566	0.582995	0.853179	0.420024	0.75328	0.741246	0.0615602	0.0168697	0.999996	0.972049	0.701072	0.984983	0.999939	0.938581	0.871391	0.435532	0.733691	0.686903	0.999967	0.979911	0.999951	0.609044	0.318829	0.21358	0.999963	0.805638	0.950269	0.83567	0.0603125	0.0157395	0.999996	0.544661	0.932819
Micos13	2410015M20RIK	#N/A	#N/A	0.877179	0.549711	0.240264	0.587538	0.979603	0.394085	0.957253	0.999925	0.922549	0.457122	0.999936	0.999956	0.907207	0.999982	0.464662	0.282805	0.240993	0.472983	0.379076	0.435626	0.882338	0.999996	0.751982	0.558921	0.963213	0.999939	0.953346	0.999915	0.907567	0.35423	0.700879	0.999967	0.947682	0.999951	0.238162	0.176804	0.520333	0.999963	0.775838	0.960042	0.920175	0.841683	0.704051	0.999996	0.994155	0.961477
Dctpp1	2410015N17RIK	#N/A	#N/A	0.310046	0.475473	0.731757	0.48515	0.661652	0.890636	0.534742	0.999925	0.922255	0.858065	0.999936	0.999956	0.999914	0.996566	0.417787	0.275393	0.115141	0.852587	0.513299	0.808861	0.256893	0.999996	0.748464	0.402455	0.999974	0.999939	0.982709	0.949273	0.70072	0.703725	0.959014	0.999967	0.96594	0.999951	0.91649	0.380299	0.528323	0.999963	0.807921	0.960042	0.279044	0.522009	0.325465	0.999996	0.912987	0.932819
Gtf3c6	2410016F19RIK	#N/A	#N/A	0.300572	0.998952	0.28105	0.280856	0.0413703	0.287343	0.997753	0.999925	0.999976	0.501391	0.999936	0.999956	0.907207	0.999982	0.0714613	0.509262	0.0682157	0.521772	0.0671812	0.545513	0.518214	0.999996	0.853717	0.310576	0.963213	0.999939	0.953346	0.958875	0.330707	0.32628	0.321634	0.999967	0.947682	0.999951	0.605105	0.34233	0.924111	0.999963	0.805638	0.999961	0.0783855	0.531548	0.524409	0.999996	0.915846	0.960815
Riox1	2410016O06RIK	#N/A	#N/A	0.336606	0.294736	0.254224	0.292802	0.300194	0.298038	0.302885	0.999925	0.861222	0.472172	0.999936	0.999956	0.907207	0.996566	0.753701	0.330279	0.0845093	0.142564	0.344328	0.275204	0.265459	0.999996	0.763416	0.348975	0.946978	0.999939	0.938581	0.949273	0.325114	0.303786	0.305194	0.999967	0.947682	0.999951	0.661989	0.165562	0.0866612	0.999963	0.775838	0.950269	0.369893	0.93107	0.792579	0.999996	0.999976	0.991781
Mterf3	2410017I18RIK	#N/A	#N/A	0.890136	0.740409	0.189424	0.555288	0.289424	0.371247	0.907457	0.999925	0.962967	0.399053	0.999936	0.999956	0.907207	0.999982	0.961391	0.5712	0.924415	0.835193	0.304597	0.224367	0.730189	0.999996	0.86669	0.988788	0.999974	0.999939	0.938581	0.973317	0.430193	0.421114	0.641513	0.999967	0.947682	0.999951	0.448712	0.176454	0.915433	0.999963	0.775838	0.999961	0.487355	0.670049	0.72135	0.999996	0.92531	0.967374
Cep57l1	2410017P07RIK	#N/A	#N/A	0.972488	0.122746	0.0207051	0.724823	0.417872	0.0734012	0.100635	0.999925	0.749938	0.090189	0.999936	0.999956	0.824894	0.996566	0.492295	0.00964366	0.183386	0.641797	0.871601	0.494275	0.391287	0.999996	0.183644	0.497096	0.984983	0.999939	0.953346	0.950709	0.49715	0.817162	0.0893752	0.999967	0.999993	0.999951	0.642963	0.085614	0.727285	0.999963	0.721568	0.971765	0.611082	0.0536044	0.429995	0.999996	0.523742	0.942178
Fam53a	2410018C17RIK	#N/A	#N/A	0.886649	0.678202	0.0574225	0.537836	0.733286	0.288934	0.509991	0.999925	0.962967	0.185112	0.999936	0.999956	0.907207	0.996566	0.763553	0.700802	0.424335	0.778112	0.932378	0.223012	0.271176	0.999996	0.930001	0.704193	0.985434	0.999939	0.938581	0.949273	0.751887	0.669184	0.977446	0.999967	0.961605	0.999951	0.785771	0.551945	0.560931	0.999963	0.893305	0.960042	0.880093	0.268218	0.338006	0.999996	0.817341	0.932819
Mzt2	2410018G20RIK	#N/A	#N/A	0.823122	0.335386	0.523227	0.818666	0.496956	0.859484	0.0553728	0.999925	0.861222	0.708124	0.999936	0.999956	0.999914	0.996566	0.408091	0.840734	0.293363	0.172223	0.972462	0.199809	0.472295	0.999996	0.965958	0.609926	0.946978	0.999939	0.938581	0.958875	0.681442	0.479536	0.131146	0.999967	0.961605	0.999951	0.514801	0.228086	0.586812	0.999963	0.796128	0.960042	0.591756	0.497877	0.20179	0.999996	0.893615	0.932819
Tm2d2	2410018G23RIK	#N/A	#N/A	0.439287	0.677033	0.787871	0.805316	0.578378	0.39918	0.556032	0.999925	0.962967	0.883731	0.999936	0.999956	0.910008	0.996566	0.824393	0.973744	0.470597	0.414041	0.173544	0.582882	0.222582	0.999996	0.999842	0.745178	0.962661	0.999939	0.959087	0.949273	0.880895	0.394224	0.570439	0.999967	0.947682	0.999951	0.318259	0.611208	0.0864667	0.999963	0.903977	0.950269	0.341335	0.755613	0.803722	0.999996	0.952879	0.995712
Usp46	2410018I08RIK	#N/A	#N/A	0.294925	0.0187756	0.291874	0.727596	0.723602	0.0879552	0.719274	0.999925	0.383002	0.512624	0.999936	0.999956	0.839503	0.996566	0.518793	0.202707	0.516764	0.51691	0.998499	0.524813	0.999507	0.999996	0.679187	0.768647	0.963213	0.999939	0.953346	0.999915	0.300479	0.0057165	0.993364	0.999967	0.622489	0.999951	0.658693	0.199962	0.658478	0.999963	0.775838	0.960042	0.642171	0.638606	0.639389	0.999996	0.92531	0.960815
Coprs	2410022L05RIK	#N/A	#N/A	0.101584	0.44824	0.633402	0.636226	0.858074	0.573804	0.118999	0.999925	0.907021	0.788032	0.999936	0.999956	0.948775	0.996566	0.0606636	0.600825	0.932333	0.378918	0.565318	0.500321	0.328996	0.999996	0.883857	0.993054	0.946978	0.999939	0.953346	0.949273	0.212801	0.891385	0.445669	0.999967	0.999993	0.999951	0.123639	0.922659	0.949987	0.999963	0.999992	0.999961	0.294876	0.350775	0.154135	0.999996	0.817341	0.932819
Atg2b	2410024A21RIK	#N/A	#N/A	0.948602	0.986711	0.00626355	0.162552	0.843991	0.928139	0.805637	0.999925	0.999976	0.0370748	0.999936	0.999956	0.999914	0.999982	0.624301	0.892094	0.118632	0.60746	0.533827	0.950897	0.250044	0.999996	0.993048	0.409356	0.971988	0.999939	0.999994	0.949273	0.85222	0.939256	0.408267	0.999967	0.999993	0.999951	0.427431	0.88723	0.642565	0.999963	0.999992	0.960042	0.927172	0.959506	0.260127	0.999996	0.999976	0.932819
Fbrsl1	2410025L10RIK	#N/A	#N/A	0.408401	0.992872	0.953139	0.527223	0.554232	0.967677	0.163658	0.999925	0.999976	0.999944	0.999936	0.999956	0.999914	0.996566	0.352079	0.551758	0.635528	0.39837	0.487196	0.514814	0.13996	0.999996	0.859206	0.833246	0.952223	0.999939	0.953346	0.949273	0.869981	0.982669	0.593258	0.999967	0.999993	0.999951	0.844896	0.314751	0.595576	0.999963	0.805638	0.960042	0.315399	0.971733	0.155432	0.999996	0.999976	0.932819
Cep85	2410030J07RIK	#N/A	#N/A	0.553727	0.5253	0.61291	0.589405	0.087892	0.576247	0.555438	0.999925	0.922549	0.772188	0.999936	0.999956	0.950146	0.996566	0.696446	0.674465	0.0536915	0.687796	0.671801	0.210811	0.691082	0.999996	0.91774	0.276265	0.984983	0.999939	0.938581	0.973317	0.168796	0.962783	0.975667	0.999967	0.999993	0.999951	0.985408	0.365854	0.99806	0.999963	0.805674	0.999961	0.327121	0.309331	0.335619	0.999996	0.817341	0.932819
Katnbl1	2410042D21RIK	#N/A	#N/A	0.791732	0.791142	0.383432	0.398847	0.793067	0.0594351	0.402696	0.999925	0.966733	0.58855	0.999936	0.999956	0.800958	0.996566	0.582286	0.105461	0.264058	0.993779	0.583448	0.609206	0.999252	0.999996	0.549072	0.584401	0.999974	0.999939	0.964162	0.999915	0.682131	0.203465	0.199475	0.999967	0.947682	0.999951	0.407625	0.391259	0.994701	0.999963	0.807921	0.999961	0.99911	0.169206	0.996417	0.999996	0.740575	0.999996
Wdr55	2410080P20RIK	#N/A	#N/A	0.994405	0.998128	0.992269	0.550161	0.542064	0.55119	0.995714	0.999925	0.999976	0.999944	0.999936	0.999956	0.9475	0.999982	0.996663	0.997134	0.530757	0.995943	0.529077	0.53175	0.529593	0.999996	0.999842	0.775084	0.999974	0.999939	0.953346	0.958875	0.666024	0.677763	0.678511	0.999967	0.961605	0.999951	0.643851	0.645703	0.644743	0.999963	0.903977	0.960042	0.671628	0.673907	0.671577	0.999996	0.92531	0.960815
Ndufaf7	2410091C18RIK	#N/A	#N/A	0.786768	0.422702	0.263231	0.0725711	0.948252	0.426116	0.0045174	0.999925	0.893299	0.481569	0.999936	0.999956	0.92557	0.996566	0.149867	0.496947	0.307687	0.0103443	0.269447	0.327045	0.0233668	0.999996	0.849991	0.616286	0.928109	0.999939	0.938581	0.891582	0.869986	0.996205	0.351031	0.999967	0.999993	0.999951	0.0403061	0.794708	0.771993	0.999963	0.95452	0.989693	0.831509	0.316122	0.00631768	0.999996	0.817341	0.932819
Puf60	2410104I19RIK	#N/A	#N/A	0.824151	0.20059	0.555989	0.548501	0.517528	0.395794	0.957651	0.999925	0.838761	0.726082	0.999936	0.999956	0.907207	0.999982	0.536785	0.51431	0.78392	0.551293	0.821863	0.292004	0.927577	0.999996	0.855983	0.904039	0.963213	0.999939	0.938581	0.999915	0.52479	0.128199	0.631837	0.999967	0.947682	0.999951	0.569162	0.254607	0.642149	0.999963	0.805638	0.960042	0.774159	0.766172	0.712609	0.999996	0.958971	0.96522
Klhdc10	2410127E18RIK	#N/A	#N/A	0.539857	0.691203	0.0125778	0.922804	0.302832	0.289454	0.54841	0.999925	0.962967	0.0625203	0.999936	0.999956	0.907207	0.996566	0.711606	0.931745	0.358104	0.983289	0.987247	0.600329	0.5127	0.999996	0.999842	0.649406	0.999974	0.999939	0.960186	0.958875	0.167164	0.217711	0.664519	0.999967	0.947682	0.999951	0.792839	0.744652	0.616226	0.999963	0.928064	0.960042	0.797044	0.68461	0.672394	0.999996	0.92531	0.960815
Mzt1	2410129H14RIK	#N/A	#N/A	0.0827077	0.522876	0.142067	0.486297	0.969103	0.914831	0.518466	0.999925	0.922549	0.335204	0.999936	0.999956	0.999914	0.996566	0.187289	0.810304	0.336099	0.771552	0.549509	0.420458	0.256649	0.999996	0.947167	0.636076	0.985155	0.999939	0.947488	0.949273	0.299884	0.651069	0.975296	0.999967	0.961605	0.999951	0.644431	0.512236	0.592507	0.999963	0.874757	0.960042	0.131398	0.646417	0.255608	0.999996	0.92531	0.932819
Mtfr1l	2410166I05RIK	#N/A	#N/A	0.310541	0.835666	0.689253	0.517277	0.23086	0.496843	0.678239	0.999925	0.983818	0.830446	0.999936	0.999956	0.9475	0.996566	0.157573	0.0903537	0.0840014	0.366407	0.243641	0.244058	0.736112	0.999996	0.517331	0.348575	0.946978	0.999939	0.938581	0.973317	0.898452	0.551324	0.874651	0.999967	0.961605	0.999951	0.834614	0.0289163	0.643617	0.999963	0.52914	0.960042	0.115499	0.728386	0.439132	0.999996	0.943741	0.947929
Slc10a7	2410193C02RIK	#N/A	#N/A	0.469709	0.807889	0.471143	0.0351014	0.815417	0.806411	0.806902	0.999925	0.973391	0.667847	0.999936	0.999956	0.982003	0.999982	0.799163	0.7983	0.454794	0.786514	0.214487	0.796761	0.0272503	0.999996	0.941119	0.731629	0.988461	0.999939	0.978131	0.920591	0.724995	0.727114	0.0965663	0.999967	0.976643	0.999951	0.264248	0.699473	0.0669833	0.999963	0.905504	0.950269	0.511974	0.998951	0.194138	0.999996	0.999976	0.932819
Tmem185b	2500001K11RIK	#N/A	#N/A	0.0228255	0.0402252	0.984004	0.240218	0.479211	0.972506	0.775628	0.999925	0.531543	0.999944	0.999936	0.999956	0.999914	0.996566	0.469059	0.369161	0.548605	0.950659	0.0300328	0.24304	0.353672	0.999996	0.769709	0.782506	0.999974	0.999939	0.938581	0.949273	0.159029	0.0821871	0.209216	0.999967	0.947682	0.999951	0.222059	0.82096	0.419292	0.999963	0.968598	0.95178	0.0775107	0.205666	0.588586	0.999996	0.753872	0.960815
Dera	2500002K03RIK	#N/A	#N/A	0.358204	0.309072	0.363711	0.362292	0.30731	0.373641	0.39166	0.999925	0.861222	0.571705	0.999936	0.999956	0.907207	0.996566	0.340203	0.345764	0.382497	0.309929	0.394825	0.284349	0.336562	0.999996	0.767412	0.666136	0.946978	0.999939	0.938581	0.949273	0.339051	0.347157	0.38307	0.999967	0.947682	0.999951	0.373275	0.321249	0.330146	0.999963	0.805638	0.950269	0.172214	0.0934935	0.459154	0.999996	0.610862	0.957517
Rnf181	2500002L14RIK	#N/A	#N/A	0.768773	0.57166	0.157889	0.626842	0.366203	0.0441828	0.165186	0.999925	0.927461	0.356457	0.999936	0.999956	0.739616	0.996566	0.933724	0.360951	0.712522	0.0411148	0.268597	0.092898	0.825413	0.999996	0.769017	0.877621	0.946978	0.999939	0.938581	0.992077	0.594404	0.200648	0.427434	0.999967	0.947682	0.999951	0.377511	0.493135	0.0573806	0.999963	0.862639	0.950269	0.47083	0.124012	0.26159	0.999996	0.685285	0.932819
Chtop	2500003M10RIK	#N/A	#N/A	0.126646	0.440343	0.14949	0.109525	0.98611	0.868379	0.827031	0.999925	0.901243	0.345646	0.999936	0.999956	0.999914	0.999982	0.531665	0.528656	0.739984	0.383051	0.44122	0.938619	0.681682	0.999996	0.856548	0.890274	0.948046	0.999939	0.999994	0.973317	0.33533	0.560776	0.259481	0.999967	0.961605	0.999951	0.930795	0.674825	0.782005	0.999963	0.903977	0.993148	0.216309	0.617061	0.25388	0.999996	0.92531	0.932819
Wipi2	2510001I10RIK	#N/A	#N/A	0.198054	0.506754	0.0109489	0.5411	0.987208	0.479564	0.486298	0.999925	0.922549	0.0565707	0.999936	0.999956	0.94738	0.996566	0.586359	0.509381	0.554106	0.0668593	0.524759	0.535162	0.499842	0.999996	0.853717	0.78352	0.946978	0.999939	0.953346	0.958875	0.29874	0.279475	0.945136	0.999967	0.947682	0.999951	0.947083	0.36408	0.0810526	0.999963	0.805638	0.950269	0.420483	0.978026	0.412162	0.999996	0.999976	0.932819
Fryl	2510002A14RIK	#N/A	#N/A	0.355819	0.754711	0.750079	0.348512	0.125736	0.745259	0.124383	0.999925	0.962967	0.866179	0.999936	0.999956	0.973675	0.996566	0.0701405	0.715427	0.269343	0.00181011	0.26982	0.704354	0.705192	0.999996	0.932672	0.590335	0.750794	0.999939	0.971638	0.973317	0.687257	0.683763	0.69128	0.999967	0.961605	0.999951	0.574989	0.574989	0.0107551	0.999963	0.899088	0.765224	0.0646329	0.992177	0.062708	0.999996	0.999976	0.932819
Rsad2	2510004L01RIK	#N/A	#N/A	0.652054	0.0061908	0.000468314	0.693311	0.0628841	0.215929	0.199946	0.999925	0.212998	0.00524	0.999936	0.999956	0.907207	0.996566	0.512877	0.0356228	0.070739	0.0110948	0.688585	0.405204	0.0500699	0.999996	0.370518	0.316439	0.928109	0.999939	0.943203	0.949273	0.071977	0.195989	0.186489	0.999967	0.947682	0.999951	0.877606	0.423562	0.0109266	0.999963	0.813064	0.765224	0.363004	0.0168534	0.570391	0.999996	0.300901	0.960815
Eef1akmt1	2510005D08RIK	#N/A	#N/A	0.536078	0.754742	0.00419863	0.603182	0.14415	0.831301	0.473817	0.999925	0.962967	0.0278215	0.999936	0.999956	0.995287	0.996566	0.784246	0.228931	0.11617	0.300514	0.648212	0.199072	0.996865	0.999996	0.701932	0.404865	0.946978	0.999939	0.938581	0.999915	0.0640127	0.626192	0.853789	0.999967	0.961605	0.999951	0.896701	0.0883661	0.464352	0.999963	0.721568	0.960042	0.61341	0.953451	0.470704	0.999996	0.999976	0.960815
Chac2	2510006C20RIK	#N/A	#N/A	0.746272	0.339626	0.749887	0.748359	0.753442	0.753417	0.756669	0.999925	0.861222	0.866179	0.999936	0.999956	0.973675	0.996566	0.99637	0.238762	0.237187	0.997131	0.996594	0.997026	0.994724	0.999996	0.710481	0.555102	0.999974	0.999939	0.999994	0.999915	0.646871	0.642126	0.650471	0.999967	0.961605	0.999951	0.999849	0.426705	0.998383	0.999963	0.81457	0.999961	0.994825	0.388165	0.99401	0.999996	0.825791	0.999996
Tmem234	2510006D16RIK	#N/A	#N/A	0.755122	0.828514	0.689406	0.40447	0.513798	0.418984	0.10319	0.999925	0.981793	0.830446	0.999936	0.999956	0.921938	0.996566	0.55288	0.389081	0.515925	0.831283	0.80212	0.973273	0.352792	0.999996	0.780252	0.768647	0.999974	0.999939	0.999994	0.949273	0.771053	0.614277	0.046331	0.999967	0.961605	0.999951	0.8085	0.559602	0.423254	0.999963	0.896402	0.952368	0.556603	0.531984	0.615053	0.999996	0.915846	0.960815
2510009E07Rik	2510009E07RIK	#N/A	#N/A	0.144718	0.0371388	0.000358894	0.940002	0.532948	0.0793667	0.671318	0.999925	0.512529	0.00431482	0.999936	0.999956	0.83458	0.996566	0.129407	0.00128701	0.5159	0.560969	0.462604	0.827179	0.365003	0.999996	0.0471021	0.768647	0.963213	0.999939	0.990016	0.949273	0.072962	0.747425	0.65503	0.999967	0.985452	0.999951	0.0829926	0.017104	0.243423	0.999963	0.419649	0.950269	0.610763	0.029272	0.83509	0.999996	0.384105	0.999996
Ube2f	2510010F15RIK	#N/A	#N/A	0.921147	0.109041	5.0813e-06	0.547386	0.656002	0.0758237	0.274932	0.999925	0.735109	0.000139989	0.999936	0.999956	0.827799	0.996566	0.837323	0.247256	0.101156	0.842558	0.906022	0.0468857	0.790329	0.999996	0.724211	0.380371	0.999974	0.999939	0.938581	0.979677	0.720789	0.903272	0.271816	0.999967	0.999993	0.999951	0.95637	0.582467	0.966341	0.999963	0.903977	0.999961	0.792989	0.0172258	0.706479	0.999996	0.305208	0.962777
Cactin	2510012J08RIK	#N/A	#N/A	0.555503	0.483656	0.50542	0.519382	0.0855173	0.641369	0.607707	0.999925	0.922549	0.695441	0.999936	0.999956	0.973675	0.996566	0.953265	0.353795	0.414807	0.976182	0.101176	0.449765	0.946241	0.999996	0.767956	0.695882	0.999974	0.999939	0.953346	0.999915	0.321281	0.321144	0.324728	0.999967	0.947682	0.999951	0.322693	0.300956	0.981364	0.999963	0.805638	0.999961	0.166542	0.885896	0.93617	0.999996	0.999976	0.999996
Rwdd3	2510027J23RIK	#N/A	#N/A	0.556291	0.231628	0.550578	0.235421	0.553937	0.997047	0.996073	0.999925	0.859591	0.723105	0.999936	0.999956	0.999914	0.999982	0.37637	0.761247	0.763386	0.766238	0.769208	0.369941	0.139765	0.999996	0.932672	0.894941	0.984983	0.999939	0.938581	0.949273	0.998018	0.399803	0.406913	0.999967	0.947682	0.999951	0.676299	0.675407	0.217651	0.999963	0.903977	0.950269	0.411532	0.40283	0.403354	0.999996	0.82743	0.932819
Nsmce1	2510027N19RIK	#N/A	#N/A	0.893484	0.777703	0.966385	0.152479	0.330487	0.521533	0.0111363	0.999925	0.96375	0.999944	0.999936	0.999956	0.9475	0.996566	0.503832	0.721576	0.861491	0.644382	0.138272	0.296806	0.0120854	0.999996	0.932672	0.951463	0.984983	0.999939	0.938581	0.866909	0.480845	0.762475	0.314039	0.999967	0.990516	0.999951	0.186297	0.385162	0.186591	0.999963	0.807921	0.950269	0.496311	0.571172	0.0201955	0.999996	0.92531	0.932819
Rps19bp1	2510038A11RIK	#N/A	#N/A	0.959329	0.961344	0.991884	0.188067	0.171093	0.162713	0.991285	0.999925	0.999976	0.999944	0.999936	0.999956	0.907207	0.999982	0.99897	0.169429	0.956939	0.954516	0.154378	0.936187	0.171326	0.999996	0.645025	0.999954	0.999974	0.999939	0.999994	0.949273	0.356397	0.345635	0.353867	0.999967	0.947682	0.999951	0.317315	0.361954	0.317514	0.999963	0.805638	0.950269	0.317979	0.309583	0.35756	0.999996	0.817341	0.932819
2510039O18Rik	2510039O18RIK	#N/A	#N/A	0.555593	0.540833	0.997164	0.999719	0.545505	0.551056	0.242324	0.999925	0.922549	0.999944	0.999936	0.999956	0.9475	0.996566	0.768569	0.759973	0.773736	0.373796	0.37071	0.771767	0.775502	0.999996	0.932672	0.89854	0.946978	0.999939	0.971638	0.973317	0.991475	0.401051	0.412415	0.999967	0.947682	0.999951	0.672078	0.677354	0.670453	0.999963	0.903977	0.960042	0.405854	0.991313	0.411624	0.999996	0.999976	0.932819
Prcp	2510048K03RIK	#N/A	#N/A	0.814472	0.0422322	1.41489e-07	0.550693	0.532628	0.0413261	0.353478	0.999925	0.536233	7.04239e-06	0.999936	0.999956	0.734096	0.996566	0.390033	0.00982455	0.0598007	0.250335	0.55785	0.798234	0.168063	0.999996	0.185267	0.294367	0.946978	0.999939	0.978406	0.949273	0.519801	0.994022	0.258366	0.999967	0.999993	0.999951	0.400014	0.161023	0.146822	0.999963	0.775838	0.950269	0.796611	0.0123282	0.82484	0.999996	0.254862	0.999996
Ccdc159	2510048L02RIK	#N/A	#N/A	0.502015	0.499438	0.998307	0.490549	0.185649	0.983786	0.994007	0.999925	0.922549	0.999944	0.999936	0.999956	0.999914	0.999982	0.0617943	0.991397	0.206981	0.985192	0.987494	0.528631	0.521919	0.999996	0.999842	0.525553	0.999974	0.999939	0.953346	0.958875	0.649431	0.635045	0.641613	0.999967	0.961605	0.999951	0.218071	0.676007	0.684989	0.999963	0.903977	0.960042	0.158388	0.635911	0.614638	0.999996	0.92531	0.960815
Pomp	2510048O06RIK	#N/A	#N/A	0.93454	0.763219	0.237669	0.509844	0.374361	0.883429	0.368486	0.999925	0.962967	0.454284	0.999936	0.999956	0.999914	0.996566	0.206641	0.723802	0.0601456	0.259485	0.794342	0.873263	0.411513	0.999996	0.932672	0.294367	0.946978	0.999939	0.999994	0.955885	0.519909	0.766477	0.871563	0.999967	0.99127	0.999951	0.179793	0.646357	0.778927	0.999963	0.903977	0.991724	0.546665	0.907947	0.252016	0.999996	0.999976	0.932819
Lsm12	2600001B17RIK	#N/A	#N/A	0.497413	0.564092	0.0446224	0.207997	0.834803	0.0714214	0.214335	0.999925	0.925811	0.154971	0.999936	0.999956	0.824503	0.996566	0.524499	0.655983	0.806987	0.256192	0.904419	0.132756	0.315479	0.999996	0.910837	0.916623	0.946978	0.999939	0.938581	0.949273	0.675851	0.0437434	0.987243	0.999967	0.947682	0.999951	0.716696	0.178105	0.92441	0.999963	0.775838	0.999961	0.596178	0.450821	0.143388	0.999996	0.854665	0.932819
Pef1	2600002E23RIK	#N/A	#N/A	0.550867	0.938963	0.821035	0.591944	0.681531	0.836674	0.868545	0.999925	0.999976	0.907319	0.999936	0.999956	0.996747	0.999982	0.818589	0.403663	0.00110447	0.678265	0.669616	0.259689	0.421376	0.999996	0.79245	0.0331164	0.984983	0.999939	0.938581	0.958875	0.554122	0.93908	0.679448	0.999967	0.999993	0.999951	0.692203	0.242266	0.463544	0.999963	0.805638	0.960042	0.863575	0.79534	0.733361	0.999996	0.972734	0.97455
Rrp1b	2600005C20RIK	#N/A	#N/A	0.339749	0.438527	0.335122	0.317271	0.324625	0.391222	0.336935	0.999925	0.901135	0.54945	0.999936	0.999956	0.907207	0.996566	0.578579	0.981384	0.689943	0.61738	0.751557	0.532051	0.853103	0.999996	0.999842	0.865887	0.978358	0.999939	0.953346	0.999915	0.338196	0.419326	0.333148	0.999967	0.947682	0.999951	0.604368	0.719817	0.683736	0.999963	0.914432	0.960042	0.829771	0.562087	0.77767	0.999996	0.92531	0.987804
Arl16	2600005N12RIK	#N/A	#N/A	0.568545	0.752656	0.539291	0.405561	0.90619	0.211812	0.471139	0.999925	0.962967	0.717447	0.999936	0.999956	0.907207	0.996566	0.71609	0.419102	0.385318	0.933167	0.906686	0.846156	0.838873	0.999996	0.80272	0.668696	0.999974	0.999939	0.995684	0.995349	0.657143	0.315584	0.321451	0.999967	0.947682	0.999951	0.867593	0.677058	0.846186	0.999963	0.903977	0.999961	0.725578	0.465962	0.9304	0.999996	0.86785	0.999996
Ddrgk1	2600009E05RIK	#N/A	#N/A	0.586663	0.260909	0.611619	0.598551	0.571979	0.29712	0.00704353	0.999925	0.861222	0.771342	0.999936	0.999956	0.907207	0.996566	0.927217	0.0383083	0.164049	0.0972115	0.283867	0.845016	0.192811	0.999996	0.382878	0.469752	0.946978	0.999939	0.995647	0.949273	0.987427	0.951291	0.104207	0.999967	0.999993	0.999951	0.447115	0.139568	0.806207	0.999963	0.775838	0.999961	0.455197	0.151555	0.0331771	0.999996	0.724222	0.932819
Otud6b	2600013N14RIK	#N/A	#N/A	0.721163	0.283755	0.733707	0.736033	0.085246	0.086802	0.734793	0.999925	0.861222	0.858994	0.999936	0.999956	0.839503	0.996566	0.189008	0.500835	0.509675	0.519837	0.506462	0.196596	0.993711	0.999996	0.85118	0.764269	0.963213	0.999939	0.938581	0.999915	0.331587	0.0604091	0.999076	0.999967	0.947682	0.999951	0.659007	0.198458	0.664451	0.999963	0.775838	0.960042	0.150467	0.638867	0.636298	0.999996	0.92531	0.960815
Mfsd11	2600014M03RIK	#N/A	#N/A	0.957609	0.963081	0.125595	0.574024	0.736838	0.447986	0.552728	0.999925	0.999976	0.309765	0.999936	0.999956	0.936618	0.996566	0.561397	0.738374	0.691139	0.977709	0.378202	0.663945	0.208586	0.999996	0.932672	0.865887	0.999974	0.999939	0.971638	0.949273	0.79778	0.596087	0.983297	0.999967	0.961605	0.999951	0.310993	0.943647	0.367783	0.999963	0.999992	0.950269	0.830943	0.590817	0.387656	0.999996	0.92531	0.932819
Ccdc71	2600016J21RIK	#N/A	#N/A	0.318565	0.271313	0.285006	0.326124	0.314632	0.337857	0.302694	0.999925	0.861222	0.50579	0.999936	0.999956	0.907207	0.996566	0.178762	0.973221	0.162148	0.996149	0.180575	0.945731	0.975989	0.999996	0.999842	0.466692	0.999974	0.999939	0.999994	0.999915	0.323732	0.310658	0.321432	0.999967	0.947682	0.999951	0.188894	0.986338	0.989993	0.999963	0.999992	0.999961	0.916989	0.0836446	0.535095	0.999996	0.589461	0.960815
Ccdc80	2610001E17RIK	#N/A	#N/A	0.67898	0.0214801	0.727434	0.608016	0.64171	0.593331	0.613255	0.999925	0.400519	0.855161	0.999936	0.999956	0.953057	0.996566	0.582801	0.132499	0.62215	0.592446	0.160286	0.171903	0.633034	0.999996	0.597677	0.824161	0.969409	0.999939	0.938581	0.973317	0.969206	0.176544	0.995519	0.999967	0.947682	0.999951	0.155827	0.914296	0.965576	0.999963	0.999992	0.999961	0.561073	0.0653926	0.50135	0.999996	0.552065	0.960815
Faap20	2610002J02RIK	#N/A	#N/A	0.981841	0.216287	0.0603798	0.45393	0.622849	0.0862444	0.0423209	0.999925	0.854015	0.191096	0.999936	0.999956	0.839503	0.996566	0.406422	0.0107398	0.00963295	0.973869	0.668181	0.925714	0.0201428	0.999996	0.195569	0.113259	0.999974	0.999939	0.999994	0.88071	0.685559	0.691772	0.297546	0.999967	0.962065	0.999951	0.403551	0.077287	0.123709	0.999963	0.708	0.950269	0.764316	0.0686944	0.0829078	0.999996	0.55901	0.932819
2610002M06Rik	2610002M06RIK	#N/A	#N/A	0.37401	0.377631	0.76304	0.760518	0.375008	0.378846	0.375152	0.999925	0.869552	0.870895	0.999936	0.999956	0.907207	0.996566	0.774661	0.779837	0.383064	0.386378	0.773246	0.778123	0.763777	0.999996	0.933649	0.6665	0.948946	0.999939	0.971714	0.973317	0.200986	0.204378	0.667017	0.999967	0.947682	0.999951	0.681077	0.687945	0.683246	0.999963	0.903977	0.960042	0.998985	0.998772	0.425291	0.999996	0.999976	0.937864
Jmjd8	2610003J06RIK	#N/A	#N/A	0.686578	0.608128	0.346539	0.838658	0.746626	0.501187	0.975562	0.999925	0.937882	0.557599	0.999936	0.999956	0.9475	0.999982	0.99185	0.121338	0.819581	0.309276	0.467173	0.687758	0.21434	0.999996	0.576697	0.925718	0.946978	0.999939	0.971638	0.949273	0.949877	0.900032	0.892747	0.999967	0.999993	0.999951	0.571626	0.141731	0.0940379	0.999963	0.775838	0.950269	0.64102	0.448618	0.880238	0.999996	0.852621	0.999996
Ddx17	2610007K22RIK	#N/A	#N/A	0.529199	0.335401	0.026817	0.933381	0.300639	0.720887	0.51297	0.999925	0.861222	0.108401	0.999936	0.999956	0.973675	0.996566	0.868242	0.1191	0.429667	0.930693	0.55912	0.81188	0.620764	0.999996	0.571909	0.708613	0.999974	0.999939	0.983479	0.972703	0.238389	0.660135	0.595913	0.999967	0.961605	0.999951	0.582942	0.191978	0.764473	0.999963	0.775838	0.985761	0.777772	0.369396	0.6956	0.999996	0.817341	0.960815
Trub1	2610009I02RIK	#N/A	#N/A	0.416518	0.851994	0.034083	0.834041	0.588272	0.562783	0.213133	0.999925	0.988865	0.128647	0.999936	0.999956	0.9475	0.996566	0.622632	0.075792	0.0997839	0.0626655	0.333091	0.324634	0.74459	0.999996	0.484887	0.378515	0.946978	0.999939	0.938581	0.973317	0.841725	0.774475	0.44793	0.999967	0.992882	0.999951	0.696411	0.0339733	0.0834874	0.999963	0.566008	0.950269	0.363681	0.605089	0.326996	0.999996	0.92531	0.932819
Mrto4	2610012O22RIK	#N/A	#N/A	0.644901	0.205097	0.329849	0.033895	0.802239	0.117162	0.557178	0.999925	0.839242	0.545558	0.999936	0.999956	0.881373	0.996566	0.98985	0.135168	0.10246	0.996467	0.947517	0.141079	0.907932	0.999996	0.601728	0.382101	0.999974	0.999939	0.938581	0.999915	0.900274	0.101408	0.112036	0.999967	0.947682	0.999951	0.96889	0.147474	0.955957	0.999963	0.775838	0.999961	0.523104	0.776951	0.159258	0.999996	0.963348	0.932819
Kmt2b	2610014H22RIK	#N/A	#N/A	0.96671	0.618349	0.258822	0.833035	0.960139	0.469063	0.528418	0.999925	0.940305	0.477078	0.999936	0.999956	0.943201	0.996566	0.378225	0.239864	0.888108	0.905545	0.373096	0.799748	0.271402	0.999996	0.711565	0.965403	0.999974	0.999939	0.978707	0.949273	0.948776	0.873238	0.768089	0.999967	0.999993	0.999951	0.126469	0.410568	0.282807	0.999963	0.808671	0.950269	0.995377	0.394411	0.555667	0.999996	0.82743	0.960815
Pbrm1	2610016F04RIK	#N/A	#N/A	0.955829	0.75008	0.538427	0.783373	0.83277	0.84649	0.468722	0.999925	0.962967	0.71723	0.999936	0.999956	0.999825	0.996566	0.267931	0.531385	0.561033	0.404593	0.413887	0.625978	0.779656	0.999996	0.856548	0.785572	0.955611	0.999939	0.970749	0.974868	0.907544	0.70313	0.736356	0.999967	0.965664	0.999951	0.0969555	0.3255	0.618922	0.999963	0.805638	0.960042	0.859403	0.933717	0.508088	0.999996	0.999976	0.960815
Dph3	2610018L09RIK	#N/A	#N/A	0.352339	0.693268	0.724612	0.340097	0.34368	0.778648	0.763472	0.999925	0.962967	0.853575	0.999936	0.999956	0.974002	0.996566	0.11961	0.762813	0.318931	0.350251	0.782095	0.336272	0.77185	0.999996	0.932672	0.624153	0.946978	0.999939	0.938581	0.973317	0.990526	0.937513	0.389616	0.999967	0.999993	0.999951	0.378299	0.392439	0.40714	0.999963	0.807921	0.950269	0.189373	0.63053	0.638796	0.999996	0.92531	0.960815
Tdrp	2610019F03RIK	#N/A	#N/A	0.29776	0.341195	0.233969	0.28652	0.331989	0.325384	0.32129	0.999925	0.861222	0.45098	0.999936	0.999956	0.907207	0.996566	0.532342	0.556468	0.571809	0.558128	0.587469	0.0935699	0.542866	0.999996	0.860527	0.791199	0.963213	0.999939	0.938581	0.958875	0.467642	0.745349	0.449855	0.999967	0.984822	0.999951	0.96001	0.174469	0.988833	0.999963	0.775838	0.999961	0.321521	0.339908	0.310694	0.999996	0.817341	0.932819
Cenpm	2610019I03RIK	#N/A	#N/A	0.287207	0.28123	0.000119341	0.0359113	0.992952	0.279944	0.00251528	0.999925	0.861222	0.00181836	0.999936	0.999956	0.907207	0.996566	0.0664917	0.253803	0.696182	0.0706894	0.260213	0.72559	0.0654265	0.999996	0.7319	0.868268	0.946978	0.999939	0.971638	0.949273	0.304999	0.997682	0.298345	0.999967	0.999993	0.999951	0.0761726	0.621883	0.981413	0.999963	0.903977	0.999961	0.535837	0.22125	0.00592322	0.999996	0.771596	0.932819
Srsf11	2610019N13RIK	#N/A	#N/A	0.66006	0.379007	0.403714	0.998073	0.853614	0.898433	0.758189	0.999925	0.869552	0.605977	0.999936	0.999956	0.999914	0.996566	0.684523	0.950999	0.902226	0.51752	0.52534	0.397992	0.711765	0.999996	0.999842	0.974681	0.963213	0.999939	0.941272	0.973317	0.618437	0.54686	0.806994	0.999967	0.961605	0.999951	0.468339	0.582506	0.478794	0.999963	0.903977	0.960042	0.871469	0.524555	0.84442	0.999996	0.913352	0.999996
Zfp157	2610020C11RIK	#N/A	#N/A	0.896281	0.161059	0.00487266	0.2361	0.875918	0.34027	0.120083	0.999925	0.800507	0.0311535	0.999936	0.999956	0.907207	0.996566	0.867543	0.444631	0.545506	0.665332	0.847073	0.107397	0.966336	0.999996	0.821223	0.782506	0.984983	0.999939	0.938581	0.999915	0.844376	0.75132	0.0705449	0.999967	0.986555	0.999951	0.803389	0.546432	0.742315	0.999963	0.889616	0.979693	0.985202	0.100868	0.781341	0.999996	0.633653	0.990176
Gdpd1	2610020H15RIK	#N/A	#N/A	0.240051	0.230171	0.995398	0.550601	0.55596	0.550063	0.996711	0.999925	0.859591	0.999944	0.999936	0.999956	0.9475	0.999982	0.0661278	0.204203	0.557227	0.51721	0.97361	0.546376	0.206846	0.999996	0.679736	0.783896	0.963213	0.999939	0.953346	0.949273	0.688713	0.68037	0.690145	0.999967	0.961605	0.999951	0.191799	0.635466	0.190199	0.999963	0.903977	0.950269	0.202925	0.194669	0.658785	0.999996	0.748649	0.960815
Ltv1	2610020N02RIK	#N/A	#N/A	0.727482	0.0835976	0.755216	0.734153	0.732855	0.716453	0.0170779	0.999925	0.704125	0.868502	0.999936	0.999956	0.973675	0.996566	0.731638	0.332593	0.334023	0.104002	0.331785	0.327581	0.747966	0.999996	0.763416	0.633833	0.946978	0.999939	0.938581	0.973317	0.996142	0.348788	0.0697049	0.999967	0.947682	0.999951	0.407357	0.994777	0.401238	0.999963	0.999992	0.950269	0.614713	0.131889	0.128388	0.999996	0.694556	0.932819
Nkap	2610020O08RIK	#N/A	#N/A	0.755556	0.662166	3.28141e-07	0.933679	0.52788	0.938399	0.000786689	0.999925	0.962241	1.45397e-05	0.999936	0.999956	0.999914	0.996566	0.899295	0.968699	0.120955	0.507271	0.380651	0.709851	0.0330122	0.999996	0.999842	0.412435	0.963213	0.999939	0.971638	0.927096	0.796291	0.77253	0.00730831	0.999967	0.992011	0.999951	0.522553	0.831728	0.331361	0.999963	0.974589	0.950269	0.553458	0.745779	0.0349262	0.999996	0.949427	0.932819
Lysmd1	2610022K04RIK	#N/A	#N/A	0.451066	0.0994493	0.0923834	0.770756	0.942539	0.907244	0.850935	0.999925	0.729856	0.253319	0.999936	0.999956	0.999914	0.999982	0.728584	0.532217	0.488209	0.977572	0.265688	0.293488	0.674089	0.999996	0.85673	0.755115	0.999974	0.999939	0.938581	0.973317	0.61346	0.255766	0.938854	0.999967	0.947682	0.999951	0.317475	0.765206	0.78637	0.999963	0.938849	0.995062	0.581378	0.239456	0.749011	0.999996	0.791411	0.977017
Noa1	2610024G14RIK	#N/A	#N/A	0.472039	0.858902	0.898027	0.471782	0.913044	0.382044	0.189862	0.999925	0.990956	0.965257	0.999936	0.999956	0.907207	0.996566	0.413454	0.131694	0.0726036	0.28162	0.312179	0.237027	0.0881798	0.999996	0.595483	0.320683	0.946978	0.999939	0.938581	0.949273	0.585865	0.645182	0.690363	0.999967	0.961605	0.999951	0.356672	0.178343	0.16369	0.999963	0.775838	0.950269	0.644915	0.429707	0.135477	0.999996	0.835441	0.932819
Eva1b	2610027C15RIK	#N/A	#N/A	0.549556	0.184755	0.276121	0.602043	0.805697	0.984524	0.957643	0.999925	0.820745	0.495901	0.999936	0.999956	0.999914	0.999982	0.881817	0.757571	0.941794	0.235238	0.348425	0.351964	0.0887968	0.999996	0.932672	0.998337	0.946978	0.999939	0.938581	0.949273	0.767763	0.264037	0.695658	0.999967	0.947682	0.999951	0.412295	0.634973	0.037676	0.999963	0.903977	0.863057	0.603357	0.418598	0.723115	0.999996	0.830849	0.968299
Polr2d	2610028L19RIK	#N/A	#N/A	0.651733	0.707405	0.692571	0.267373	0.724123	0.196365	0.696718	0.999925	0.962967	0.832647	0.999936	0.999956	0.907207	0.996566	0.977892	0.304868	0.356439	0.997424	0.937342	0.438148	0.110469	0.999996	0.761285	0.64733	0.999974	0.999939	0.953346	0.949273	0.563457	0.503895	0.600285	0.999967	0.961605	0.999951	0.967733	0.839121	0.206256	0.999963	0.978799	0.950269	0.946169	0.259165	0.309949	0.999996	0.811643	0.932819
Zfp623	2610029D06RIK	#N/A	#N/A	0.663201	0.108072	0.0710055	0.163198	0.682752	0.850519	0.723175	0.999925	0.735109	0.213685	0.999936	0.999956	0.999914	0.996566	0.512878	0.076847	0.810572	0.201451	0.815868	0.774709	0.5703	0.999996	0.488289	0.919855	0.946978	0.999939	0.971714	0.962563	0.985967	0.242219	0.491003	0.999967	0.947682	0.999951	0.773211	0.165482	0.622747	0.999963	0.775838	0.960042	0.522289	0.277833	0.189552	0.999996	0.817341	0.932819
Pbdc1	2610029G23RIK	#N/A	#N/A	0.0010902	0.711444	2.97947e-05	0.834509	0.179144	0.0852165	0.868412	0.459814	0.962967	0.000585387	0.999936	0.999956	0.839503	0.999982	0.00377614	0.108805	0.0464541	0.560215	0.126046	0.509735	0.540148	0.829195	0.556436	0.25729	0.963213	0.999939	0.953346	0.958875	0.00792532	0.207675	0.820464	0.999967	0.947682	0.999951	0.020791	0.223914	0.518786	0.999963	0.788928	0.960042	0.0716708	0.239836	0.970189	0.999996	0.791411	0.999996
Prpf6	2610031L17RIK	#N/A	#N/A	0.560521	0.321772	0.000444079	0.0336479	0.807293	0.566658	0.775339	0.999925	0.861222	0.00505549	0.999936	0.999956	0.947799	0.996566	0.701047	0.511156	0.98069	0.110406	0.562184	0.869314	0.208632	0.999996	0.854521	0.999954	0.946978	0.999939	0.999994	0.949273	0.816259	0.290074	0.201099	0.999967	0.947682	0.999951	0.869608	0.494977	0.766792	0.999963	0.863867	0.986806	0.553627	0.760538	0.0877024	0.999996	0.954959	0.932819
2610033C09Rik	2610033C09RIK	#N/A	#N/A	0.92756	0.112374	0.261859	0.475162	0.736502	0.63714	0.751101	0.999925	0.737896	0.480471	0.999936	0.999956	0.973618	0.996566	0.851728	0.882311	0.215678	0.853954	0.998128	0.306353	0.901707	0.999996	0.989833	0.533897	0.999974	0.999939	0.938581	0.999915	0.811131	0.251977	0.565011	0.999967	0.947682	0.999951	0.921954	0.533851	0.97434	0.999963	0.88529	0.999961	0.791763	0.228294	0.668454	0.999996	0.779167	0.960815
Med25	2610034E13RIK	#N/A	#N/A	0.187285	0.655705	0.636687	0.986941	0.360733	0.994665	0.182363	0.999925	0.959527	0.791187	0.999936	0.999956	0.999914	0.996566	0.192647	0.663322	0.677513	0.381368	0.397627	0.999994	0.686172	0.999996	0.913046	0.860288	0.947232	0.999939	0.999994	0.973317	0.751162	0.738028	0.305265	0.999967	0.981949	0.999951	0.733573	0.752042	0.730137	0.999963	0.931271	0.973909	0.153383	0.767302	0.388064	0.999996	0.958971	0.932819
Ints4	2610034N24RIK	#N/A	#N/A	0.344949	0.742982	0.0785028	0.564187	0.759796	0.934689	0.497823	0.999925	0.962967	0.228443	0.999936	0.999956	0.999914	0.996566	0.415422	0.612448	0.500884	0.970586	0.740684	0.894644	0.954827	0.999996	0.890269	0.761433	0.999974	0.999939	0.999994	0.999915	0.671839	0.871243	0.412301	0.999967	0.999993	0.999951	0.762445	0.691745	0.990201	0.999963	0.904363	0.999961	0.3497	0.757355	0.938523	0.999996	0.953921	0.999996
Tti1	2610036D13RIK	#N/A	#N/A	0.941476	0.29972	0.499591	0.822141	0.727231	0.921818	0.859155	0.999925	0.861222	0.691499	0.999936	0.999956	0.999914	0.999982	0.966408	0.434337	0.871793	0.327119	0.573429	0.699906	0.299684	0.999996	0.813334	0.956545	0.946978	0.999939	0.971638	0.949273	0.863393	0.478628	0.801852	0.999967	0.961605	0.999951	0.650046	0.764536	0.140674	0.999963	0.938203	0.950269	0.730329	0.442919	0.969106	0.999996	0.847621	0.999996
Mis18a	2610039C10RIK	#N/A	#N/A	0.651221	0.511831	4.45152e-05	0.715481	0.772574	0.0889079	0.37259	0.999925	0.922549	0.000806676	0.999936	0.999956	0.839503	0.996566	0.660667	0.0235024	0.210443	0.939343	0.547842	0.975398	0.649989	0.999996	0.312087	0.529712	0.999974	0.999939	0.999994	0.973317	0.604133	0.451517	0.381635	0.999967	0.961605	0.999951	0.469688	0.117406	0.791483	0.999963	0.753564	0.996495	0.908657	0.106701	0.709438	0.999996	0.647356	0.964735
Spata2l	2610039E05RIK	#N/A	#N/A	0.645357	0.10871	0.189269	0.855231	0.792238	0.79132	0.383634	0.999925	0.735109	0.398951	0.999936	0.999956	0.978028	0.996566	0.955315	0.903964	0.884317	0.20214	0.887954	0.143052	0.0540609	0.999996	0.998466	0.963138	0.946978	0.999939	0.938581	0.949273	0.634951	0.222069	0.489502	0.999967	0.947682	0.999951	0.95557	0.298882	0.0441539	0.999963	0.805638	0.928599	0.88142	0.307711	0.601531	0.999996	0.817341	0.960815
Lrrc40	2610040E16RIK	#N/A	#N/A	0.339101	0.113101	0.75309	0.343573	0.745347	0.750119	0.749036	0.999925	0.7389	0.86835	0.999936	0.999956	0.973675	0.996566	0.996969	0.522324	0.521267	0.517568	0.527597	0.202102	0.987321	0.999996	0.856548	0.771107	0.963213	0.999939	0.938581	0.999915	0.359242	0.355722	0.364309	0.999967	0.947682	0.999951	0.650766	0.640282	0.632749	0.999963	0.903977	0.960042	0.663934	0.198016	0.665962	0.999996	0.748649	0.960815
Sys1	2610042O14RIK	#N/A	#N/A	0.39512	0.992923	0.406226	0.988085	0.401114	0.994398	0.094794	0.999925	0.999976	0.608402	0.999936	0.999956	0.999914	0.996566	0.688586	0.688068	0.227665	0.0460355	0.680915	0.68937	0.664375	0.999996	0.925002	0.546309	0.946978	0.999939	0.971638	0.973317	0.298942	0.992115	0.292521	0.999967	0.999993	0.999951	0.622253	0.626868	0.142845	0.999963	0.903977	0.950269	0.992831	0.998786	0.176189	0.999996	0.999976	0.932819
U2surp	2610101N10RIK	#N/A	#N/A	0.659893	0.272702	0.131901	0.228412	0.553371	0.491714	0.781544	0.999925	0.861222	0.319628	0.999936	0.999956	0.9475	0.996762	0.861756	0.231011	0.589509	0.480592	0.974948	0.646725	0.496764	0.999996	0.704835	0.801251	0.963213	0.999939	0.971638	0.958875	0.41822	0.74202	0.460997	0.999967	0.983277	0.999951	0.882589	0.590454	0.985062	0.999963	0.903977	0.999961	0.922013	0.261632	0.347278	0.999996	0.815265	0.932819
Mtdh	2610103J23RIK	#N/A	#N/A	0.361242	0.922896	0.026387	0.988023	0.815139	0.418607	0.275588	0.999925	0.999976	0.107302	0.999936	0.999956	0.921937	0.996566	0.275311	0.256522	0.0117126	0.124617	0.937114	0.829831	0.650678	0.999996	0.735726	0.125031	0.946978	0.999939	0.990979	0.973317	0.662272	0.648046	0.479153	0.999967	0.961605	0.999951	0.50945	0.382251	0.201478	0.999963	0.807921	0.950269	0.370791	0.477909	0.398712	0.999996	0.879565	0.932819
Atat1	2610110G12RIK	#N/A	#N/A	0.543995	0.994758	0.54663	0.0720245	0.994314	0.544556	0.99456	0.999925	0.999976	0.720704	0.999936	0.999956	0.9475	0.999982	0.337911	0.336672	0.340884	0.337563	0.113892	0.747743	0.33657	0.999996	0.765111	0.639862	0.946978	0.999939	0.971638	0.949273	0.666956	0.667109	0.195615	0.999967	0.961605	0.999951	0.0629823	0.332365	0.998772	0.999963	0.805638	0.999961	0.67337	0.67407	0.21787	0.999996	0.92531	0.932819
Cluap1	2610111M03RIK	#N/A	#N/A	0.989055	0.995027	0.428833	0.415796	0.983866	0.971824	0.406852	0.999925	0.999976	0.62963	0.999936	0.999956	0.999914	0.996566	0.647141	0.600384	0.644819	0.635654	0.641759	0.634103	0.0219497	0.999996	0.883857	0.839738	0.983994	0.999939	0.971638	0.891582	0.983571	0.98592	0.992273	0.999967	0.999993	0.999951	0.540434	0.507568	0.0704656	0.999963	0.872939	0.950269	0.995527	0.971431	0.167413	0.999996	0.999976	0.932819
Accs	2610203E10RIK	#N/A	#N/A	0.533507	0.599192	0.0489327	0.611059	0.599015	0.507314	0.464153	0.999925	0.9341	0.165383	0.999936	0.999956	0.9475	0.996566	0.238389	0.347245	0.211682	0.297628	0.308832	0.242163	0.50634	0.999996	0.767412	0.530297	0.946978	0.999939	0.938581	0.958875	0.568935	0.555566	0.53843	0.999967	0.961605	0.999951	0.277102	0.296187	0.396542	0.999963	0.805638	0.950269	0.475672	0.314963	0.110836	0.999996	0.817341	0.932819
Ramac	2610204K14RIK	#N/A	#N/A	0.0844414	0.155406	0.0396081	0.645495	0.521585	0.704413	0.710121	0.999925	0.799757	0.142581	0.999936	0.999956	0.973675	0.996566	0.247424	0.31376	0.127981	0.785345	0.229277	0.970158	0.277213	0.999996	0.762382	0.423169	0.98815	0.999939	0.999994	0.949273	0.463355	0.240516	0.953448	0.999967	0.947682	0.999951	0.975449	0.525666	0.377173	0.999963	0.882334	0.950269	0.0831421	0.426533	0.532017	0.999996	0.834863	0.960815
Ccdc47	2610204L23RIK	#N/A	#N/A	0.068817	0.174551	0.4525	0.913357	0.483909	0.206544	0.995209	0.999925	0.808409	0.652194	0.999936	0.999956	0.907207	0.999982	0.511287	0.992299	0.504775	0.253454	0.668248	0.919047	0.299372	0.999996	0.999842	0.762885	0.946978	0.999939	0.999994	0.949273	0.0613613	0.0540291	0.936871	0.999967	0.947682	0.999951	0.870584	0.937119	0.132624	0.999963	0.999992	0.950269	0.453837	0.949061	0.940654	0.999996	0.999976	0.999996
Inf2	2610204M08RIK	#N/A	#N/A	0.347567	0.0460126	0.00164766	0.120552	0.968605	0.00491452	0.10663	0.999925	0.557679	0.0136229	0.999936	0.999956	0.35265	0.996566	0.971248	0.0557993	0.172083	0.423185	0.50957	0.219389	0.447049	0.999996	0.442026	0.480468	0.963213	0.999939	0.938581	0.958875	0.533238	0.519161	0.0374619	0.999967	0.961605	0.999951	0.70014	0.688566	0.391066	0.999963	0.903977	0.950269	0.486334	0.00212088	0.963197	0.999996	0.0920239	0.999996
Ntmt1	2610205E22RIK	#N/A	#N/A	0.390273	0.764044	0.762139	0.769605	0.770771	0.382636	0.377922	0.999925	0.962967	0.870583	0.999936	0.999956	0.907207	0.996566	0.751173	0.758251	0.764635	0.132014	0.362348	0.36428	0.365107	0.999996	0.932672	0.89505	0.946978	0.999939	0.938581	0.949273	0.412998	0.403962	0.40336	0.999967	0.947682	0.999951	0.356977	0.361956	0.0785668	0.999963	0.805638	0.950269	0.694315	0.691617	0.683509	0.999996	0.92531	0.960815
Mpc2	2610205H19RIK	#N/A	#N/A	0.250742	0.19903	0.0146459	0.409735	0.387432	0.24765	0.324646	0.999925	0.83763	0.0698256	0.999936	0.999956	0.907207	0.996566	0.225026	0.720529	0.572446	0.884853	0.769245	0.435144	0.704031	0.999996	0.932672	0.791263	0.999974	0.999939	0.953346	0.973317	0.31377	0.22388	0.364609	0.999967	0.947682	0.999951	0.361209	0.490406	0.886125	0.999963	0.860486	0.999961	0.428065	0.715532	0.653657	0.999996	0.938677	0.960815
Smg1	2610207I05RIK	#N/A	#N/A	0.587227	0.625142	0.00411611	0.801414	0.77668	0.659729	0.735383	0.999925	0.94614	0.0274628	0.999936	0.999956	0.973675	0.996566	0.867696	0.502053	0.502035	0.600911	0.918124	0.772393	0.664358	0.999996	0.851216	0.761433	0.971832	0.999939	0.971638	0.973317	0.525036	0.970085	0.649604	0.999967	0.999993	0.999951	0.958508	0.754465	0.438833	0.999963	0.932702	0.958663	0.866293	0.549395	0.955293	0.999996	0.923246	0.999996
Aida	2610208M17RIK	#N/A	#N/A	0.165347	0.495277	0.049269	0.732629	0.255235	0.898661	0.616039	0.999925	0.922549	0.16611	0.999936	0.999956	0.999914	0.996566	0.914948	0.457366	0.143183	0.377639	0.877271	0.853278	0.298096	0.999996	0.828949	0.442651	0.946978	0.999939	0.997877	0.949273	0.0669095	0.541508	0.525599	0.999967	0.961605	0.999951	0.970935	0.479883	0.151932	0.999963	0.855813	0.950269	0.864799	0.714896	0.916006	0.999996	0.938226	0.999996
Snrnp27	2610209M04RIK	#N/A	#N/A	0.994991	0.220588	0.555106	0.225869	0.544449	0.535451	0.534656	0.999925	0.859591	0.725797	0.999936	0.999956	0.9475	0.996566	0.998307	0.540637	0.545033	0.547175	0.559871	0.234751	0.235863	0.999996	0.856923	0.782506	0.963213	0.999939	0.938581	0.949273	0.673955	0.672006	0.679783	0.999967	0.961605	0.999951	0.696132	0.693442	0.689985	0.999963	0.904529	0.960042	0.667073	0.193971	0.196981	0.999996	0.748649	0.932819
Cenpl	2610300B10RIK	#N/A	#N/A	0.0234687	0.0702796	0.0275927	0.201802	0.437001	0.120955	0.557769	0.999925	0.663879	0.11046	0.999936	0.999956	0.887139	0.996566	0.137965	0.90379	0.0649279	0.287478	0.908251	0.00609887	0.558518	0.999996	0.998466	0.303349	0.946978	0.999939	0.689912	0.962047	0.011836	0.80531	0.532869	0.999967	0.999993	0.999951	0.246486	0.0552188	0.72335	0.999963	0.689226	0.971276	0.351769	0.0531881	0.270351	0.999996	0.523671	0.932819
Sap130	2610304F09RIK	#N/A	#N/A	0.488718	0.612788	0.00640584	0.866432	0.49445	0.904154	0.0524312	0.999925	0.938718	0.0377772	0.999936	0.999956	0.999914	0.996566	0.349676	0.912353	0.184114	0.32502	0.841345	0.833931	0.425781	0.999996	0.999842	0.4975	0.946978	0.999939	0.991153	0.958875	0.993992	0.60942	0.148006	0.999967	0.961605	0.999951	0.626749	0.947692	0.899783	0.999963	0.999992	0.999961	0.3943	0.809444	0.188418	0.999996	0.977647	0.932819
Rprd1b	2610304G08RIK	#N/A	#N/A	0.276192	0.684132	0.689657	0.704075	0.294803	0.278013	0.286023	0.999925	0.962967	0.830614	0.999936	0.999956	0.907207	0.996566	0.22525	0.703213	0.224864	0.672133	0.240632	0.698194	0.234143	0.999996	0.931453	0.543422	0.984983	0.999939	0.971638	0.949273	0.975464	0.284709	0.299035	0.999967	0.947682	0.999951	0.972149	0.995339	0.174709	0.999963	0.999992	0.950269	0.15586	0.641227	0.637042	0.999996	0.92531	0.960815
Zc3h15	2610312B22RIK	#N/A	#N/A	0.503242	0.596278	0.00235676	0.625067	0.695568	0.38237	0.154572	0.999925	0.932902	0.0177496	0.999936	0.999956	0.907207	0.996566	0.742821	0.547332	0.230872	0.983575	0.573498	0.755621	0.412461	0.999996	0.85843	0.548607	0.999974	0.999939	0.971638	0.956083	0.860727	0.382629	0.235368	0.999967	0.947682	0.999951	0.891559	0.59852	0.626743	0.999963	0.903977	0.960042	0.393667	0.777985	0.441724	0.999996	0.963523	0.948714
Dram2	2610318G18RIK	#N/A	#N/A	0.348204	0.293308	0.294305	0.320307	0.344052	0.329603	0.34187	0.999925	0.861222	0.515194	0.999936	0.999956	0.907207	0.996566	0.116594	0.827929	0.120503	0.948006	0.0924915	0.363293	0.56315	0.999996	0.958047	0.412318	0.999974	0.999939	0.938581	0.962082	0.352618	0.318118	0.337693	0.999967	0.947682	0.999951	0.0296548	0.622843	0.716351	0.999963	0.903977	0.968338	0.933208	0.435281	0.654728	0.999996	0.84071	0.960815
Fnbp1l	2610318I01RIK	#N/A	#N/A	0.844353	0.907919	0.76308	0.270672	0.332046	0.402549	0.846244	0.999925	0.999976	0.870895	0.999936	0.999956	0.911052	0.999982	0.725505	0.0883587	0.470767	0.949508	0.292741	0.555283	0.301494	0.999996	0.513901	0.745178	0.999974	0.999939	0.95546	0.949273	0.644527	0.667787	0.443035	0.999967	0.961605	0.999951	0.640706	0.13716	0.521284	0.999963	0.774803	0.960042	0.296056	0.391254	0.410506	0.999996	0.82743	0.932819
Klhl22	2610318I18RIK	#N/A	#N/A	0.459308	0.993749	0.467608	0.451225	0.143404	0.475965	0.986182	0.999925	0.999976	0.664983	0.999936	0.999956	0.946353	0.999982	0.211127	0.200145	0.687284	0.677187	0.215563	0.0424336	0.676335	0.999996	0.678638	0.864723	0.984983	0.999939	0.938581	0.973317	0.645908	0.655463	0.633251	0.999967	0.961605	0.999951	0.993293	0.034042	0.999373	0.999963	0.566008	0.999961	0.0781185	0.558834	0.541616	0.999996	0.92531	0.960815
Pip4p2	2610319K07RIK	#N/A	#N/A	0.744342	0.0388447	0.43162	0.696868	0.0116969	0.520412	0.172599	0.999925	0.526342	0.63192	0.999936	0.999956	0.9475	0.996566	0.00408893	0.209617	0.037301	0.110948	0.983841	0.797324	0.543501	0.847998	0.682809	0.231346	0.946978	0.999939	0.978131	0.958875	0.140748	0.0824124	0.254624	0.999967	0.947682	0.999951	0.0524972	0.501873	0.14908	0.999963	0.867959	0.950269	0.0354749	0.26682	0.454665	0.999996	0.817341	0.954745
2610507B11Rik	2610507B11RIK	#N/A	#N/A	0.195945	0.379615	0.747808	0.772288	0.664967	0.0196589	0.32546	0.999925	0.869552	0.865602	0.999936	0.999956	0.663663	0.996566	0.464807	0.180236	0.217171	0.40411	0.375607	0.447681	0.289397	0.999996	0.655171	0.535631	0.955611	0.999939	0.953346	0.949273	0.263903	0.317908	0.64781	0.999967	0.947682	0.999951	0.421592	0.297565	0.347428	0.999963	0.805638	0.950269	0.507017	0.0205245	0.33635	0.999996	0.332124	0.932819
Cep89	2610507L03RIK	#N/A	#N/A	0.170333	0.961725	0.160729	0.970083	0.162326	0.993173	0.952369	0.999925	0.999976	0.360687	0.999936	0.999956	0.999914	0.999982	0.699816	0.420943	0.097268	0.0275824	0.252787	0.764656	0.658312	0.999996	0.804532	0.374138	0.946978	0.999939	0.971638	0.973317	0.175687	0.977613	0.991198	0.999967	0.999993	0.999951	0.307423	0.732129	0.224484	0.999963	0.921766	0.950269	0.574227	0.420801	0.0584899	0.999996	0.831463	0.932819
Zmat5	2610510L01RIK	#N/A	#N/A	0.743148	0.366799	0.316341	0.951007	0.866495	0.172447	0.0684135	0.999925	0.862775	0.534465	0.999936	0.999956	0.907207	0.996566	0.72572	0.909854	0.283102	0.627663	0.852584	0.704638	0.137115	0.999996	0.999842	0.60252	0.982463	0.999939	0.971638	0.949273	0.708406	0.0975464	0.183897	0.999967	0.947682	0.999951	0.671133	0.83291	0.420297	0.999963	0.975299	0.95178	0.916291	0.754371	0.214946	0.999996	0.951957	0.932819
Tmem101	2610511E22RIK	#N/A	#N/A	0.863919	0.0864693	0.543301	0.468424	0.917336	0.807284	0.189199	0.999925	0.709259	0.718562	0.999936	0.999956	0.982686	0.996566	0.688948	0.170604	0.29241	0.372168	0.935697	0.353534	0.844072	0.999996	0.645025	0.609134	0.946978	0.999939	0.938581	0.997604	0.969004	0.390936	0.246948	0.999967	0.947682	0.999951	0.768331	0.779876	0.505437	0.999963	0.946851	0.960042	0.786874	0.0631283	0.555359	0.999996	0.544661	0.960815
Ttc27	2610511O17RIK	#N/A	#N/A	0.983804	0.844166	0.0182508	0.641235	0.985639	0.456108	0.811247	0.999925	0.986677	0.0825322	0.999936	0.999956	0.940474	0.999982	0.426104	0.897523	0.231395	0.57121	0.427546	0.465715	0.83822	0.999996	0.995529	0.548792	0.964701	0.999939	0.953346	0.995349	0.98009	0.54039	0.882004	0.999967	0.961605	0.999951	0.270369	0.546745	0.798322	0.999963	0.889616	0.998377	0.998602	0.673668	0.590935	0.999996	0.92531	0.960815
Prelid1	2610524G07RIK	#N/A	#N/A	0.520736	0.412459	0.989741	0.244039	0.94648	0.74145	0.399615	0.999925	0.888194	0.999944	0.999936	0.999956	0.973675	0.996566	0.557075	0.791521	0.450446	0.0973222	0.853251	0.785331	0.612567	0.999996	0.936995	0.728159	0.946978	0.999939	0.974206	0.971638	0.655647	0.377028	0.798019	0.999967	0.947682	0.999951	0.715913	0.994197	0.292164	0.999963	0.999992	0.950269	0.647048	0.750256	0.202831	0.999996	0.951106	0.932819
Mtrex	2610528A15RIK	#N/A	#N/A	0.790053	0.0794995	1.91416e-05	0.306899	0.514667	0.465797	0.101483	0.999925	0.685887	0.000417868	0.999936	0.999956	0.942152	0.996566	0.617634	0.252077	0.232851	0.0707269	0.839379	0.440444	0.833574	0.999996	0.729272	0.55007	0.946978	0.999939	0.953346	0.993211	0.796381	0.481239	0.669102	0.999967	0.961605	0.999951	0.863815	0.825608	0.349472	0.999963	0.971017	0.950269	0.497628	0.0745232	0.0583345	0.999996	0.57276	0.932819
2610528J11Rik	2610528J11RIK	#N/A	#N/A	0.968695	0.750994	0.280087	0.456007	0.523538	0.219386	0.106244	0.999925	0.962967	0.50039	0.999936	0.999956	0.907207	0.996566	0.652229	0.335446	0.150683	0.0821751	0.78706	0.887563	0.275754	0.999996	0.763782	0.453742	0.946978	0.999939	0.999994	0.949273	0.648523	0.301669	0.546627	0.999967	0.947682	0.999951	0.877628	0.484246	0.56488	0.999963	0.858318	0.960042	0.660352	0.500259	0.0928526	0.999996	0.896382	0.932819
Mon2	2610528O22RIK	#N/A	#N/A	0.31375	0.79597	0.171568	0.826446	0.951141	0.749435	0.962027	0.999925	0.967752	0.375276	0.999936	0.999956	0.973675	0.999982	0.577952	0.634895	0.240985	0.621653	0.72083	0.936929	0.454913	0.999996	0.904065	0.558921	0.981216	0.999939	0.999994	0.958875	0.433906	0.964326	0.899729	0.999967	0.999993	0.999951	0.888447	0.78115	0.388182	0.999963	0.947583	0.950269	0.523313	0.697703	0.85744	0.999996	0.927746	0.999996
Arl14ep	2700007P21RIK	#N/A	#N/A	0.776874	0.203332	0.022047	0.846795	0.481993	0.123824	0.216104	0.999925	0.839242	0.0939513	0.999936	0.999956	0.890877	0.996566	0.895753	0.103744	0.998357	0.229672	0.33564	0.136071	0.694508	0.999996	0.545772	0.999954	0.946978	0.999939	0.938581	0.973317	0.764095	0.842348	0.455164	0.999967	0.999993	0.999951	0.493275	0.905389	0.501977	0.999963	0.999992	0.960042	0.496781	0.0618553	0.324828	0.999996	0.544661	0.932819
Tbc1d9b	2700008N14RIK	#N/A	#N/A	0.261575	0.431159	0.0629994	0.265426	0.9944	0.740131	0.350435	0.999925	0.898587	0.196718	0.999936	0.999956	0.973675	0.996566	0.860027	0.0691975	0.165565	0.417779	0.189481	0.46727	0.320598	0.999996	0.46881	0.471617	0.963213	0.999939	0.953346	0.949273	0.390565	0.723896	0.125416	0.999967	0.97425	0.999951	0.247931	0.0554194	0.167743	0.999963	0.689226	0.950269	0.463467	0.470406	0.904863	0.999996	0.871578	0.999996
Ppme1	2700017M01RIK	#N/A	#N/A	0.983278	0.881644	0.492683	0.891007	0.845753	0.840271	0.662859	0.999925	0.999976	0.68524	0.999936	0.999956	0.998006	0.996566	0.711236	0.955056	0.199724	0.453134	0.579429	0.667827	0.886753	0.999996	0.999842	0.516322	0.963213	0.999939	0.971638	0.999915	0.878394	0.97015	0.831663	0.999967	0.999993	0.999951	0.481381	0.71013	0.495562	0.999963	0.910113	0.960042	0.904183	0.808133	0.691511	0.999996	0.977363	0.960815
Lsm14a	2700023B17RIK	#N/A	#N/A	0.415655	0.707746	0.194836	0.0747732	0.988754	0.951712	0.14068	0.999925	0.962967	0.404817	0.999936	0.999956	0.999914	0.996566	0.436826	0.73415	0.741583	0.145489	0.963799	0.531315	0.124862	0.999996	0.932672	0.890949	0.946978	0.999939	0.953346	0.949273	0.536149	0.744882	0.80605	0.999967	0.984571	0.999951	0.575527	0.512889	0.954767	0.999963	0.874757	0.999961	0.595569	0.834811	0.0396184	0.999996	0.991595	0.932819
Reep4	2700029E10RIK	#N/A	#N/A	0.321622	0.0380679	0.014283	0.857398	0.382506	0.268698	0.564386	0.999925	0.52054	0.068665	0.999936	0.999956	0.907207	0.996566	0.0584721	0.025851	0.35012	0.340449	0.667005	0.0767516	0.64898	0.999996	0.320072	0.644608	0.946978	0.999939	0.938581	0.973317	0.9411	0.529594	0.642828	0.999967	0.961605	0.999951	0.267511	0.707394	0.299181	0.999963	0.908785	0.950269	0.128146	0.01313	0.738093	0.999996	0.262707	0.975416
Ppdpf	2700038C09RIK	#N/A	#N/A	0.480071	0.238424	0.213993	0.0922822	0.604349	0.175453	0.0901335	0.999925	0.859591	0.428292	0.999936	0.999956	0.907207	0.996566	0.815923	0.30035	0.157351	0.0482603	0.703585	0.37015	0.511485	0.999996	0.759127	0.459798	0.946978	0.999939	0.938581	0.958875	0.33641	0.0548756	0.992394	0.999967	0.947682	0.999951	0.7016	0.233909	0.393813	0.999963	0.803264	0.950269	0.904097	0.907585	0.0404338	0.999996	0.999976	0.932819
Zfp655	2700038I16RIK	#N/A	#N/A	0.573742	0.566111	0.867841	0.507259	0.758298	0.921975	0.125723	0.999925	0.92607	0.943129	0.999936	0.999956	0.999914	0.996566	0.936143	0.418387	0.890653	0.474053	0.353485	0.975889	0.747701	0.999996	0.802523	0.966514	0.963213	0.999939	0.999994	0.973317	0.863166	0.748242	0.147412	0.999967	0.985452	0.999951	0.49562	0.500821	0.750114	0.999963	0.867749	0.981983	0.525133	0.62276	0.514541	0.999996	0.92531	0.960815
Wdr61	2700038L12RIK	#N/A	#N/A	0.378618	0.496666	0.977397	0.772188	0.118909	0.962565	0.920868	0.999925	0.922549	0.999944	0.999936	0.999956	0.999914	0.999982	0.42017	0.414166	0.553724	0.91461	0.137783	0.890715	0.637578	0.999996	0.800043	0.783392	0.999974	0.999939	0.999994	0.973317	0.478235	0.521584	0.846806	0.999967	0.961605	0.999951	0.548427	0.413669	0.618922	0.999963	0.810066	0.960042	0.172005	0.679269	0.825063	0.999996	0.92531	0.999996
Ufsp1	2700038N03RIK	#N/A	#N/A	0.0794352	0.275237	0.746269	0.726752	0.706917	0.728176	0.717324	0.999925	0.861222	0.864625	0.999936	0.999956	0.973675	0.996566	0.681298	0.270863	0.72603	0.260852	0.0661741	0.694123	0.255495	0.999996	0.743711	0.883979	0.946978	0.999939	0.971638	0.949273	0.154172	0.611219	0.630767	0.999967	0.961605	0.999951	0.12083	0.615798	0.12296	0.999963	0.903977	0.950269	0.308524	0.299339	0.99266	0.999996	0.817341	0.999996
Edrf1	2700050L05RIK	#N/A	#N/A	0.138002	0.116613	0.00482747	0.323765	0.796849	0.610527	0.997217	0.999925	0.74413	0.0309904	0.999936	0.999956	0.963067	0.999982	0.432729	0.0273572	0.354029	0.807559	0.405978	0.201967	0.502233	0.999996	0.328217	0.647046	0.995252	0.999939	0.938581	0.958875	0.302713	0.0915043	0.4117	0.999967	0.947682	0.999951	0.972216	0.0161327	0.751525	0.999963	0.416015	0.981983	0.285392	0.505183	0.541316	0.999996	0.899376	0.960815
Itfg2	2700050P07RIK	#N/A	#N/A	0.26715	0.0337003	0.613516	0.880071	0.971363	0.931037	0.974033	0.999925	0.494315	0.772821	0.999936	0.999956	0.999914	0.999982	0.712581	0.322654	0.98312	0.831048	0.528007	0.327997	0.709925	0.999996	0.763416	0.999954	0.999974	0.999939	0.938581	0.973317	0.427274	0.131734	0.930281	0.999967	0.947682	0.999951	0.864242	0.994258	0.705193	0.999963	0.999992	0.96351	0.44337	0.139456	0.902324	0.999996	0.709182	0.999996
Marchf5	2700055A20RIK	#N/A	#N/A	0.637185	0.401768	0.303172	0.888834	0.800516	0.674615	0.618713	0.999925	0.880939	0.523853	0.999936	0.999956	0.973675	0.996566	0.869693	0.566059	0.471718	0.514412	0.917645	0.951704	0.901891	0.999996	0.864076	0.745838	0.963213	0.999939	0.999994	0.999915	0.633383	0.409414	0.812932	0.999967	0.947682	0.999951	0.959702	0.598023	0.659391	0.999963	0.903977	0.960042	0.868825	0.750893	0.632321	0.999996	0.951106	0.960815
Rtraf	2700060E02RIK	#N/A	#N/A	0.943505	0.587612	0.0316821	0.60282	0.915504	0.565684	0.726896	0.999925	0.932283	0.122116	0.999936	0.999956	0.947799	0.996566	0.301066	0.962663	0.0154523	0.359296	0.403305	0.190084	0.940771	0.999996	0.999842	0.14659	0.946978	0.999939	0.938581	0.999915	0.980042	0.98168	0.902926	0.999967	0.999993	0.999951	0.11776	0.244916	0.467143	0.999963	0.805638	0.960042	0.902323	0.44183	0.548062	0.999996	0.847219	0.960815
2700062C07Rik	2700062C07RIK	#N/A	#N/A	0.546713	0.254458	0.953942	0.169981	0.776665	0.0807674	0.519303	0.999925	0.861222	0.999944	0.999936	0.999956	0.837022	0.996566	0.498243	0.0570618	0.365382	0.681372	0.902552	0.487514	0.792712	0.999996	0.443774	0.654368	0.984983	0.999939	0.953346	0.98093	0.826274	0.663057	0.174978	0.999967	0.961605	0.999951	0.724324	0.428302	0.925134	0.999963	0.815533	0.999961	0.525546	0.0473266	0.593032	0.999996	0.493339	0.960815
Mob2	2700078K21RIK	#N/A	#N/A	0.0504551	0.705541	0.649127	0.686273	0.655221	0.684739	0.231621	0.999925	0.962967	0.800994	0.999936	0.999956	0.973675	0.996566	0.249615	0.690725	0.690104	0.722511	0.727021	0.710838	0.235166	0.999996	0.925142	0.865887	0.984983	0.999939	0.971638	0.949273	0.0730768	0.549761	0.53945	0.999967	0.961605	0.999951	0.553841	0.575508	0.539012	0.999963	0.899088	0.960042	0.314878	0.985328	0.301737	0.999996	0.999976	0.932819
Utp11	2700082D03RIK	#N/A	#N/A	0.744795	0.472723	0.066111	0.426318	0.794084	0.541202	0.57169	0.999925	0.920061	0.204029	0.999936	0.999956	0.9475	0.996566	0.671447	0.447737	0.199511	0.763909	0.91875	0.507169	0.357727	0.999996	0.823148	0.516309	0.984983	0.999939	0.953346	0.949273	0.960162	0.310363	0.857382	0.999967	0.947682	0.999951	0.825403	0.3358	0.669741	0.999963	0.805638	0.960042	0.704898	0.94422	0.382656	0.999996	0.999976	0.932819
Cdk19	2700084L06RIK	#N/A	#N/A	0.944507	0.606606	0.243574	0.555681	0.806098	0.384393	0.773978	0.999925	0.93652	0.46132	0.999936	0.999956	0.907207	0.996566	0.335014	0.313383	0.45812	0.425409	0.581925	0.590976	0.233507	0.999996	0.762382	0.734308	0.963213	0.999939	0.959087	0.949273	0.916803	0.413868	0.603622	0.999967	0.947682	0.999951	0.277393	0.267836	0.158029	0.999963	0.805638	0.950269	0.776208	0.746162	0.78426	0.999996	0.949478	0.990344
Glod4	2700085E05RIK	#N/A	#N/A	0.759771	0.363265	0.130009	0.765796	0.764536	0.362463	0.357891	0.999925	0.861222	0.316894	0.999936	0.999956	0.907207	0.996566	0.536206	0.216375	0.0671413	0.532075	0.998942	0.535895	0.98839	0.999996	0.685488	0.30791	0.963213	0.999939	0.953346	0.999915	0.996396	0.999108	0.383603	0.999967	0.999993	0.999951	0.646852	0.642311	0.651876	0.999963	0.903977	0.960042	0.679507	0.221378	0.668741	0.999996	0.771596	0.960815
Mier2	2700087H15RIK	#N/A	#N/A	0.283678	0.604676	0.728317	0.602642	0.738127	0.178972	0.58327	0.999925	0.935663	0.85552	0.999936	0.999956	0.907207	0.996566	0.0555176	0.530245	0.952736	0.418098	0.815338	0.102903	0.617105	0.999996	0.856548	0.999954	0.963213	0.999939	0.938581	0.972141	0.617238	0.21753	0.984891	0.999967	0.947682	0.999951	0.0656791	0.0564164	0.782749	0.999963	0.689226	0.993148	0.305192	0.536583	0.434648	0.999996	0.916942	0.943507
Zcrb1	2700088M22RIK	#N/A	#N/A	0.550323	0.400991	0.00390173	0.902546	0.383487	0.734301	0.583608	0.999925	0.880492	0.0263385	0.999936	0.999956	0.973675	0.996566	0.691562	0.306307	0.377288	0.398694	0.466082	0.692881	0.968761	0.999996	0.762382	0.660222	0.952223	0.999939	0.971638	0.999915	0.343521	0.742764	0.781238	0.999967	0.983496	0.999951	0.376193	0.615114	0.484454	0.999963	0.903977	0.960042	0.831645	0.370595	0.608368	0.999996	0.817341	0.960815
Ccdc77	2700091N06RIK	#N/A	#N/A	0.563735	0.583144	0.556251	0.590993	0.544459	0.0888242	0.5639	0.999925	0.932283	0.726171	0.999936	0.999956	0.839503	0.996566	0.163766	0.655267	0.164325	0.650362	0.656171	0.162324	0.647796	0.999996	0.910837	0.469752	0.984983	0.999939	0.938581	0.973317	0.985937	0.176624	0.98064	0.999967	0.947682	0.999951	0.303841	0.30227	0.998392	0.999963	0.805638	0.999961	0.315325	0.313514	0.343619	0.999996	0.817341	0.932819
Tmem209	2700094F01RIK	#N/A	#N/A	0.661804	0.678269	0.192596	0.675139	0.658845	0.663326	0.672422	0.999925	0.962967	0.402779	0.999936	0.999956	0.973675	0.996566	0.990759	0.155338	0.97586	0.937901	0.165979	0.924495	0.163818	0.999996	0.630589	0.999954	0.999974	0.999939	0.999994	0.949273	0.998182	0.990877	0.998344	0.999967	0.999993	0.999951	0.32375	0.28561	0.300006	0.999963	0.805638	0.950269	0.338392	0.354045	0.358606	0.999996	0.817341	0.932819
Selenoh	2700094K13RIK	#N/A	#N/A	0.869502	0.287761	0.324114	0.533964	0.498138	0.990423	0.400097	0.999925	0.861222	0.540986	0.999936	0.999956	0.999914	0.996566	0.898491	0.593974	0.803499	0.372015	0.772085	0.731178	0.770539	0.999996	0.880849	0.914748	0.946978	0.999939	0.971638	0.973317	0.533609	0.435791	0.869038	0.999967	0.954329	0.999951	0.919711	0.905845	0.706926	0.999963	0.999992	0.964707	0.731353	0.472959	0.333968	0.999996	0.875202	0.932819
Ccdc12	2700094L05RIK	#N/A	#N/A	0.410553	0.195362	0.0689376	0.545773	0.803416	0.11152	0.426654	0.999925	0.830655	0.20982	0.999936	0.999956	0.874503	0.996566	0.043341	0.00676182	0.710613	0.376091	0.177818	0.435297	0.516997	0.999996	0.143828	0.877239	0.946978	0.999939	0.953346	0.958875	0.536361	0.857157	0.421662	0.999967	0.999993	0.999951	0.0378715	0.189916	0.327767	0.999963	0.775838	0.950269	0.577911	0.0107968	0.851983	0.999996	0.232208	0.999996
2700097O09Rik	2700097O09RIK	#N/A	#N/A	0.189403	0.83174	0.0802788	0.122548	0.226323	0.379043	0.499353	0.999925	0.983475	0.231325	0.999936	0.999956	0.907207	0.996566	0.57277	0.204662	0.305262	0.602194	0.0785024	0.789703	0.182181	0.999996	0.679736	0.615704	0.971921	0.999939	0.97502	0.949273	0.944079	0.658484	0.151066	0.999967	0.961605	0.999951	0.442279	0.338141	0.250054	0.999963	0.805638	0.950269	0.0683442	0.413378	0.502889	0.999996	0.828645	0.960815
Coa8	2810002N01RIK	#N/A	#N/A	0.50228	0.406299	0.84181	0.956077	0.132121	0.917794	0.181055	0.999925	0.884897	0.922593	0.999936	0.999956	0.999914	0.996566	0.896302	0.747201	0.682788	0.599324	0.370942	0.249899	0.46261	0.999996	0.932672	0.862408	0.971832	0.999939	0.938581	0.958875	0.149104	0.622055	0.384529	0.999967	0.961605	0.999951	0.522028	0.359561	0.894987	0.999963	0.805638	0.999961	0.532724	0.496604	0.31073	0.999996	0.892702	0.932819
Ptpmt1	2810004N20RIK	#N/A	#N/A	0.714733	0.876619	0.0220151	0.90125	0.785015	0.0340158	0.673413	0.999925	0.998754	0.0939368	0.999936	0.999956	0.695536	0.996566	0.838477	0.641074	0.316967	0.865107	0.73753	0.214296	0.529332	0.999996	0.90591	0.622902	0.999974	0.999939	0.938581	0.958875	0.934629	0.0510331	0.792796	0.999967	0.947682	0.999951	0.92739	0.585768	0.58072	0.999963	0.903977	0.960042	0.702226	0.231292	0.743626	0.999996	0.782472	0.975976
2810004N23Rik	2810004N23RIK	#N/A	#N/A	0.370508	0.35558	0.35442	0.744579	0.762436	0.361309	0.764052	0.999925	0.861222	0.564353	0.999936	0.999956	0.907207	0.996566	0.997418	0.542958	0.555538	0.555945	0.569335	0.250334	0.992189	0.999996	0.856923	0.783616	0.963213	0.999939	0.938581	0.999915	0.393765	0.993613	0.985308	0.999967	0.999993	0.999951	0.69749	0.705441	0.690719	0.999963	0.90729	0.960042	0.681496	0.215077	0.667697	0.999996	0.766275	0.960815
Sult2a8	2810007J24RIK	#N/A	#N/A	0.633137	0.316468	9.42042e-06	0.894814	0.341184	0.0602264	0.546989	0.999925	0.861222	0.000234195	0.999936	0.999956	0.800958	0.996566	0.955593	0.11465	0.102151	0.411398	0.818377	0.292967	0.273265	0.999996	0.565373	0.381585	0.960018	0.999939	0.938581	0.949273	0.269743	0.0324853	0.56617	0.999967	0.947682	0.999951	0.922559	0.149256	0.289216	0.999963	0.775838	0.950269	0.758404	0.556187	0.762652	0.999996	0.92531	0.981831
Smim15	2810008M24RIK	#N/A	#N/A	0.841438	0.645566	0.145851	0.826775	0.960078	0.557851	0.383176	0.999925	0.954201	0.339778	0.999936	0.999956	0.9475	0.996566	0.538103	0.648106	0.806946	0.649449	0.701216	0.603194	0.571343	0.999996	0.907753	0.916623	0.984983	0.999939	0.961043	0.962563	0.903053	0.917935	0.594633	0.999967	0.999993	0.999951	0.464928	0.962572	0.934184	0.999963	0.999992	0.999961	0.875456	0.514049	0.495274	0.999996	0.906509	0.960815
Fam53c	2810012G03RIK	#N/A	#N/A	0.19918	0.990496	0.701347	0.181002	0.642186	0.211866	0.0109073	0.999925	0.999976	0.838003	0.999936	0.999956	0.907207	0.996566	0.722323	0.634684	0.422486	0.0431287	0.169542	0.432771	0.0628674	0.999996	0.904065	0.703296	0.946978	0.999939	0.953346	0.949273	0.517031	0.335443	0.30887	0.999967	0.947682	0.999951	0.428126	0.809993	0.891246	0.999963	0.962197	0.999961	0.266013	0.417324	0.0179925	0.999996	0.829424	0.932819
Mtif3	2810012L14RIK	#N/A	#N/A	0.20613	0.562261	0.0527201	0.918972	0.636836	0.713604	0.475914	0.999925	0.925135	0.175249	0.999936	0.999956	0.973675	0.996566	0.870301	0.21059	0.00405173	0.895728	0.0281389	0.316567	0.267885	0.999996	0.683593	0.0705133	0.999974	0.999939	0.938581	0.949273	0.632698	0.575075	0.715862	0.999967	0.961605	0.999951	0.118645	0.144144	0.411697	0.999963	0.775838	0.950269	0.127751	0.847305	0.464761	0.999996	0.996344	0.960274
Mplkip	2810021B07RIK	#N/A	#N/A	0.320305	0.409312	0.277575	0.315612	0.370454	0.288851	0.32446	0.999925	0.886427	0.497689	0.999936	0.999956	0.907207	0.996566	0.360716	0.278417	0.230688	0.323472	0.311152	0.397024	0.332531	0.999996	0.75024	0.548508	0.946978	0.999939	0.941272	0.949273	0.351255	0.352058	0.326876	0.999967	0.947682	0.999951	0.341936	0.340813	0.334712	0.999963	0.805638	0.950269	0.329941	0.0283507	0.854445	0.999996	0.378544	0.999996
Tmem128	2810021O14RIK	#N/A	#N/A	0.531342	0.996553	0.41113	0.109184	0.377354	0.206698	0.800427	0.999925	0.999976	0.613532	0.999936	0.999956	0.907207	0.999982	0.687885	0.401712	0.608451	0.469455	0.504741	0.642801	0.490677	0.999996	0.791562	0.814833	0.963213	0.999939	0.971638	0.958875	0.291816	0.369949	0.193507	0.999967	0.947682	0.999951	0.439625	0.783016	0.979938	0.999963	0.947814	0.999961	0.856376	0.381261	0.343405	0.999996	0.824262	0.932819
Skida1	2810030E01RIK	#N/A	#N/A	0.74228	0.110965	0.717408	0.736363	0.749197	0.753517	0.730172	0.999925	0.735109	0.849741	0.999936	0.999956	0.973675	0.996566	0.751017	0.761672	0.371701	0.757913	0.757329	0.376695	0.752228	0.999996	0.932672	0.657022	0.984983	0.999939	0.938581	0.973317	0.632194	0.163918	0.615052	0.999967	0.947682	0.999951	0.674421	0.694399	0.675575	0.999963	0.904529	0.960042	0.995114	0.3861	0.995602	0.999996	0.824406	0.999996
Hnrnpll	2810036L13RIK	#N/A	#N/A	0.207286	0.195271	0.412657	0.515759	0.997698	0.194313	0.527152	0.999925	0.830655	0.615318	0.999936	0.999956	0.907207	0.996566	0.371298	0.758272	0.868864	0.75975	0.793505	0.760267	0.391744	0.999996	0.932672	0.955367	0.984983	0.999939	0.971638	0.950709	0.332082	0.0557421	0.989081	0.999967	0.947682	0.999951	0.660488	0.672681	0.701886	0.999963	0.903977	0.96177	0.412614	0.998506	0.410312	0.999996	0.999976	0.932819
Gins4	2810037C03RIK	#N/A	#N/A	0.767619	0.824089	0.768444	0.925816	0.427016	0.615713	0.991628	0.999925	0.980132	0.872108	0.999936	0.999956	0.966347	0.999982	0.895551	0.975058	0.15636	0.47525	0.190934	0.735904	0.547174	0.999996	0.999842	0.459308	0.963213	0.999939	0.971638	0.958875	0.732438	0.622443	0.955097	0.999967	0.961605	0.999951	0.28452	0.782819	0.330491	0.999963	0.947814	0.950269	0.433146	0.839227	0.940244	0.999996	0.993567	0.999996
Armc10	2810037C14RIK	#N/A	#N/A	0.895248	0.519028	0.979224	0.788365	0.182158	0.20925	0.427376	0.999925	0.922549	0.999944	0.999936	0.999956	0.907207	0.996566	0.731507	0.714712	0.937623	0.403976	0.18388	0.882749	0.970109	0.999996	0.932672	0.996058	0.955611	0.999939	0.999994	0.999915	0.256832	0.148202	0.680785	0.999967	0.947682	0.999951	0.286651	0.888574	0.608457	0.999963	0.999992	0.960042	0.436616	0.688731	0.496107	0.999996	0.92531	0.960815
Proser1	2810046L04RIK	#N/A	#N/A	0.568173	0.35756	0.016292	0.919093	0.75823	0.636814	0.679082	0.999925	0.861222	0.0757385	0.999936	0.999956	0.973618	0.996566	0.511136	0.544262	0.246335	0.925806	0.776224	0.375377	0.808777	0.999996	0.856923	0.564673	0.999974	0.999939	0.938581	0.984724	0.856709	0.75697	0.724789	0.999967	0.987477	0.999951	0.783135	0.834845	0.912811	0.999963	0.97634	0.999961	0.52838	0.320848	0.821811	0.999996	0.817341	0.999996
Zcchc17	2810055E05RIK	#N/A	#N/A	0.530741	0.0674713	0.0875814	0.534478	0.540516	0.0709618	0.572936	0.999925	0.652514	0.245083	0.999936	0.999956	0.824503	0.996566	0.266229	0.331653	0.28524	0.348772	0.383593	0.567754	0.993036	0.999996	0.763416	0.604909	0.946978	0.999939	0.95684	0.999915	0.539666	0.0781704	0.557371	0.999967	0.947682	0.999951	0.189419	0.303468	0.530697	0.999963	0.805638	0.960042	0.857107	0.76715	0.489274	0.999996	0.958971	0.960815
L3hypdh	2810055F11RIK	#N/A	#N/A	0.353533	0.748777	0.347332	0.757371	0.353301	0.755392	0.747867	0.999925	0.962967	0.558235	0.999936	0.999956	0.973675	0.996566	0.749514	0.351657	0.355269	0.759751	0.749858	0.347264	0.750268	0.999996	0.767412	0.647242	0.984983	0.999939	0.938581	0.973317	0.155444	0.620818	0.621588	0.999967	0.961605	0.999951	0.618981	0.154028	0.626655	0.999963	0.775838	0.960042	0.999767	0.99554	0.993594	0.999996	0.999976	0.999996
Khdc4	2810403A07RIK	#N/A	#N/A	0.560385	0.481744	0.863478	0.539393	0.599867	0.713192	0.0471688	0.999925	0.922549	0.940031	0.999936	0.999956	0.973675	0.996566	0.949299	0.253559	0.127798	0.562074	0.286934	0.400523	0.072076	0.999996	0.73148	0.423169	0.963213	0.999939	0.941272	0.949273	0.961175	0.37413	0.240352	0.999967	0.947682	0.999951	0.410698	0.157289	0.361939	0.999963	0.775838	0.950269	0.49775	0.83514	0.115228	0.999996	0.991815	0.932819
Shq1	2810403P18RIK	#N/A	#N/A	0.0119204	0.500424	0.995728	0.996794	0.507914	0.99124	0.507817	0.999925	0.922549	0.999944	0.999936	0.999956	0.999914	0.996566	0.0140535	0.517099	0.203713	0.999216	0.519972	0.998299	0.522065	0.999996	0.855983	0.521936	0.999974	0.999939	0.999994	0.958875	0.199392	0.648671	0.657539	0.999967	0.961605	0.999951	0.218963	0.671659	0.676781	0.999963	0.903977	0.960042	0.0234817	0.62163	0.624099	0.999996	0.92531	0.960815
Nsun4	2810405F18RIK	#N/A	#N/A	0.980603	0.499855	0.790354	0.239121	0.02842	0.262837	0.248315	0.999925	0.922549	0.885148	0.999936	0.999956	0.907207	0.996566	0.1519	0.373076	0.144482	0.173616	0.60006	0.200982	0.490327	0.999996	0.770651	0.4446	0.946978	0.999939	0.938581	0.958875	0.0263869	0.0726871	0.980403	0.999967	0.947682	0.999951	0.469099	0.100006	0.591002	0.999963	0.734145	0.960042	0.215516	0.798394	0.196106	0.999996	0.973625	0.932819
Chmp1b	2810405I11RIK	#N/A	#N/A	0.342604	0.538293	0.0852068	0.47836	0.60561	0.159752	0.0725085	0.999925	0.922549	0.240785	0.999936	0.999956	0.907207	0.996566	0.976009	0.395427	0.00903743	0.5472	0.117621	0.967966	0.0711998	0.999996	0.786267	0.109535	0.963213	0.999939	0.999994	0.949273	0.751856	0.152858	0.0792457	0.999967	0.947682	0.999951	0.205046	0.501708	0.0547909	0.999963	0.867959	0.950269	0.322284	0.581781	0.444466	0.999996	0.92531	0.950288
Fam98a	2810405J04RIK	#N/A	#N/A	0.949381	0.214686	5.27956e-06	0.243855	0.267645	0.255393	0.176177	0.999925	0.853561	0.000144385	0.999936	0.999956	0.907207	0.996566	0.463661	0.900179	0.000307605	0.504251	0.758984	0.826118	0.121412	0.999996	0.996994	0.0147217	0.963213	0.999939	0.98938	0.949273	0.465027	0.10754	0.892114	0.999967	0.947682	0.999951	0.786444	0.827308	0.567603	0.999963	0.972441	0.960042	0.409214	0.939861	0.0863505	0.999996	0.999976	0.932819
Prxl2b	2810405K02RIK	#N/A	#N/A	0.862749	0.0567658	0.0312194	0.109041	0.569637	0.0904414	0.563395	0.999925	0.61252	0.12102	0.999936	0.999956	0.84194	0.996566	0.33661	0.213178	0.19011	0.338739	0.309252	0.332737	0.261472	0.999996	0.684291	0.50508	0.946978	0.999939	0.938581	0.949273	0.78678	0.875988	0.474959	0.999967	0.999993	0.999951	0.329491	0.275779	0.30549	0.999963	0.805638	0.950269	0.592802	0.0153652	0.123292	0.999996	0.288842	0.932819
Zfp688	2810407K09RIK	#N/A	#N/A	0.995298	0.99891	0.2676	0.0380805	0.28986	0.297275	0.301117	0.999925	0.999976	0.486936	0.999936	0.999956	0.907207	0.996566	0.284483	0.997429	0.293271	0.286532	0.0377599	0.296703	0.980151	0.999996	0.999842	0.609905	0.946978	0.999939	0.938581	0.999915	0.534917	0.539498	0.0749587	0.999967	0.961605	0.999951	0.0719622	0.537778	0.539788	0.999963	0.887392	0.960042	0.328276	0.337582	0.315354	0.999996	0.817341	0.932819
Txndc11	2810408E11RIK	#N/A	#N/A	0.696532	0.664042	0.212626	0.67142	0.720854	0.705737	0.255193	0.999925	0.962967	0.427458	0.999936	0.999956	0.973675	0.996566	0.178428	0.61982	0.0749761	0.152709	0.364596	0.326433	0.0655675	0.999996	0.896367	0.325259	0.946978	0.999939	0.938581	0.949273	0.976671	0.959486	0.173122	0.999967	0.999993	0.999951	0.202922	0.399216	0.0689206	0.999963	0.807921	0.950269	0.656115	0.628668	0.666137	0.999996	0.92531	0.960815
Trp53rka	2810408M09RIK	#N/A	#N/A	0.559376	0.248414	0.555032	0.999483	0.551489	0.994544	0.98846	0.999925	0.861222	0.725797	0.999936	0.999956	0.999914	0.999982	0.997762	0.0118063	0.992202	0.988811	0.18808	0.186903	0.998723	0.999996	0.20499	0.999954	0.999974	0.999939	0.938581	0.999915	0.993509	0.425631	0.991729	0.999967	0.948043	0.999951	0.298513	0.00537369	0.992126	0.999963	0.258922	0.999961	0.400952	0.409935	0.992081	0.999996	0.827969	0.999996
Ola1	2810409H07RIK	#N/A	#N/A	0.90348	0.204548	6.99851e-05	0.736807	0.313532	0.802435	0.480547	0.999925	0.839242	0.00116632	0.999936	0.999956	0.98122	0.996566	0.95776	0.655844	0.566357	0.675142	0.304649	0.0393433	0.990813	0.999996	0.910837	0.788846	0.984983	0.999939	0.938581	0.999915	0.459495	0.500322	0.4963	0.999967	0.961605	0.999951	0.442069	0.0802327	0.75879	0.999963	0.711422	0.984144	0.500741	0.254394	0.778318	0.999996	0.808233	0.987855
Cyb5rl	2810410C14RIK	#N/A	#N/A	0.879706	0.99904	0.316214	0.0225946	0.150634	0.958515	0.168507	0.999925	0.999976	0.534372	0.999936	0.999956	0.999914	0.996566	0.0275124	0.526337	0.874427	0.601058	0.442264	0.557783	0.154475	0.999996	0.856548	0.957262	0.971832	0.999939	0.956624	0.949273	0.255521	0.962372	0.00366603	0.999967	0.999993	0.999951	0.0250345	0.338247	0.131277	0.999963	0.805638	0.950269	0.34143	0.975734	0.559811	0.999996	0.999976	0.960815
Dpy30	2810410M20RIK	#N/A	#N/A	0.915359	0.520885	0.684964	0.390517	0.355176	0.883371	0.672791	0.999925	0.922549	0.8279	0.999936	0.999956	0.999914	0.996566	0.934408	0.958938	0.866172	0.543665	0.296345	0.605813	0.552568	0.999996	0.999842	0.954797	0.963213	0.999939	0.961921	0.961325	0.541916	0.558414	0.743343	0.999967	0.961605	0.999951	0.436011	0.694417	0.992551	0.999963	0.904529	0.999961	0.493205	0.741027	0.397194	0.999996	0.948411	0.932819
Arl5a	2810410P22RIK	#N/A	#N/A	0.490643	0.386135	0.66424	0.5244	0.373085	0.546361	0.176101	0.999925	0.873865	0.812291	0.999936	0.999956	0.9475	0.996566	0.356414	0.176489	0.350053	0.246804	0.470833	0.273857	0.662739	0.999996	0.651343	0.644608	0.946978	0.999939	0.938581	0.973317	0.419542	0.452272	0.309637	0.999967	0.961605	0.999951	0.401367	0.214802	0.414095	0.999963	0.782298	0.950944	0.695807	0.610416	0.172111	0.999996	0.92531	0.932819
Senp7	2810413I22RIK	#N/A	#N/A	0.582579	0.514733	0.000951375	0.506802	0.683793	0.451033	0.414337	0.999925	0.922549	0.00900132	0.999936	0.999956	0.939109	0.996566	0.37185	0.945839	0.475187	0.809587	0.967172	0.237714	0.280732	0.999996	0.999842	0.747839	0.995717	0.999939	0.938581	0.949273	0.902441	0.929409	0.894748	0.999967	0.999993	0.999951	0.498801	0.419228	0.541308	0.999963	0.812026	0.960042	0.561726	0.396113	0.371768	0.999996	0.82743	0.932819
Flywch2	2810417J12RIK	#N/A	#N/A	0.388794	0.999707	0.992519	0.092868	0.991668	0.395783	0.393	0.999925	0.999976	0.999944	0.999936	0.999956	0.907207	0.996566	0.98014	0.440248	0.448383	0.418212	0.44965	0.126229	0.128797	0.999996	0.818703	0.726797	0.963213	0.999939	0.938581	0.949273	0.557946	0.568502	0.56586	0.999967	0.961605	0.999951	0.644401	0.154548	0.644966	0.999963	0.775838	0.960042	0.530966	0.531933	0.0718469	0.999996	0.915846	0.932819
Ptcd3	2810422B04RIK	#N/A	#N/A	0.534358	0.53488	0.216627	0.523405	0.213633	0.986478	0.9984	0.999925	0.922549	0.430283	0.999936	0.999956	0.999914	0.999982	0.295185	0.296284	0.727717	0.726832	0.729115	0.734019	0.717378	0.999996	0.757294	0.884299	0.984983	0.999939	0.971638	0.973317	0.218829	0.685997	0.668195	0.999967	0.961605	0.999951	0.301835	0.304837	0.992435	0.999963	0.805638	0.999961	0.639699	0.637781	0.638437	0.999996	0.92531	0.960815
Mettl18	2810422O20RIK	#N/A	#N/A	0.999617	0.214137	0.532302	0.532795	0.214454	0.992672	0.53835	0.999925	0.853193	0.714359	0.999936	0.999956	0.999914	0.996566	0.510464	0.996178	0.193685	0.504795	0.5084	0.192953	0.510479	0.999996	0.999842	0.509891	0.963213	0.999939	0.938581	0.958875	0.359459	0.355544	0.364472	0.999967	0.947682	0.999951	0.997941	0.3012	0.299324	0.999963	0.805638	0.950269	0.405506	0.408719	0.995456	0.999996	0.82743	0.999996
Mfsd8	2810423E13RIK	#N/A	#N/A	0.0806032	0.739724	0.767686	0.277917	0.70485	0.72108	0.732205	0.999925	0.962967	0.871871	0.999936	0.999956	0.973675	0.996566	0.466231	0.469612	0.994116	0.1399	0.462622	0.454053	0.996127	0.999996	0.833463	0.999954	0.946978	0.999939	0.953346	0.999915	0.155958	0.642277	0.612525	0.999967	0.961605	0.999951	0.996649	0.307933	0.298936	0.999963	0.805638	0.950269	0.310469	0.985501	0.301715	0.999996	0.999976	0.932819
Rex1bd	2810428I15RIK	#N/A	#N/A	0.559331	0.0370637	0.674321	0.750213	0.827571	0.0275983	0.60167	0.999925	0.512527	0.819281	0.999936	0.999956	0.676139	0.996566	0.310308	0.00769751	0.171049	0.40824	0.469847	0.44019	0.322589	0.999996	0.157857	0.478827	0.957681	0.999939	0.953346	0.949273	0.627257	0.936445	0.611011	0.999967	0.999993	0.999951	0.334242	0.260979	0.313331	0.999963	0.805638	0.950269	0.751872	0.00128968	0.860189	0.999996	0.0684816	0.999996
Rrp15	2810430M08RIK	#N/A	#N/A	0.324965	0.0873338	0.534792	0.331719	0.753934	0.112571	0.241178	0.999925	0.710436	0.715419	0.999936	0.999956	0.874503	0.996566	0.979222	0.809884	0.553294	0.841229	0.0811093	0.676756	0.937206	0.999996	0.947	0.783266	0.999974	0.999939	0.971638	0.999915	0.681143	0.054078	0.200675	0.999967	0.947682	0.999951	0.164771	0.604437	0.923434	0.999963	0.903977	0.999961	0.271105	0.91032	0.858873	0.999996	0.999976	0.999996
Rpp25l	2810432D09RIK	#N/A	#N/A	0.422444	0.870077	0.016681	0.9602	0.873166	0.217682	0.956948	0.999925	0.99464	0.0770193	0.999936	0.999956	0.907207	0.999982	0.538259	0.314082	0.658084	0.865661	0.895706	0.963057	0.868074	0.999996	0.762382	0.847552	0.999974	0.999939	0.999994	0.999915	0.414986	0.36158	0.9294	0.999967	0.947682	0.999951	0.640025	0.545988	0.833556	0.999963	0.889616	0.999961	0.694031	0.3949	0.998013	0.999996	0.82743	0.999996
Cox19	2810437L13RIK	#N/A	#N/A	0.431994	0.0842647	0.130155	0.835047	0.982399	0.409348	0.601723	0.999925	0.706068	0.317146	0.999936	0.999956	0.914206	0.996566	0.313849	0.262584	0.358823	0.494766	0.961406	0.98918	0.852529	0.999996	0.737958	0.65032	0.963213	0.999939	0.999994	0.999915	0.607387	0.0951596	0.83255	0.999967	0.947682	0.999951	0.380912	0.346461	0.677945	0.999963	0.805638	0.960042	0.552912	0.493466	0.592487	0.999996	0.890195	0.960815
Ttc39c	2810439F02RIK	#N/A	#N/A	0.336803	0.618924	1.82119e-14	0.60606	0.604666	0.259912	0.241888	0.999925	0.940543	3.57816e-12	0.999936	0.999956	0.907207	0.996566	0.27642	0.155831	0.509735	0.100812	0.554548	0.379083	0.276824	0.999996	0.630589	0.764269	0.946978	0.999939	0.938581	0.949273	0.740605	0.637615	0.623781	0.999967	0.961605	0.999951	0.391477	0.243133	0.167821	0.999963	0.805638	0.950269	0.327259	0.282334	0.264753	0.999996	0.817341	0.932819
Tmem135	2810439K08RIK	#N/A	#N/A	0.664973	0.282157	0.048296	0.63759	0.408911	0.595535	0.896326	0.999925	0.861222	0.163899	0.999936	0.999956	0.954133	0.999982	0.318481	0.283876	0.295719	0.329037	0.331245	0.3341	0.318073	0.999996	0.751982	0.611286	0.946978	0.999939	0.938581	0.949273	0.341747	0.673653	0.646903	0.999967	0.961605	0.999951	0.331593	0.315306	0.330316	0.999963	0.805638	0.950269	0.79591	0.299366	0.82367	0.999996	0.817341	0.999996
Tmem216	2810441K11RIK	#N/A	#N/A	0.337714	0.3583	0.920322	0.930695	0.834989	0.35233	0.775184	0.999925	0.861222	0.981449	0.999936	0.999956	0.907207	0.996566	0.271326	0.498346	0.344956	0.251323	0.795436	0.164247	0.461103	0.999996	0.850629	0.642476	0.946978	0.999939	0.938581	0.958875	0.483337	0.99438	0.904795	0.999967	0.999993	0.999951	0.384185	0.638651	0.232683	0.999963	0.903977	0.950269	0.509717	0.116931	0.744257	0.999996	0.677929	0.976167
Tbc1d20	2810442O16RIK	#N/A	#N/A	0.162632	0.817573	0.109592	0.523947	0.776252	0.533249	0.421439	0.999925	0.977049	0.284278	0.999936	0.999956	0.9475	0.996566	0.387261	0.945089	0.166491	0.817781	0.339187	0.622552	0.961012	0.999996	0.999842	0.472093	0.999756	0.999939	0.97029	0.999915	0.403088	0.525986	0.289079	0.999967	0.961605	0.999951	0.938209	0.640509	0.815965	0.999963	0.903977	0.999961	0.267465	0.793609	0.910757	0.999996	0.972336	0.999996
Cinp	2810452K22RIK	#N/A	#N/A	0.703614	0.463157	0.749274	0.921773	0.444593	0.874434	0.421351	0.999925	0.915897	0.865872	0.999936	0.999956	0.999914	0.996566	0.645054	0.830199	0.953013	0.798151	0.405112	0.283224	0.348071	0.999996	0.958882	0.999954	0.990725	0.999939	0.938581	0.949273	0.383656	0.657883	0.48991	0.999967	0.961605	0.999951	0.344686	0.345062	0.381242	0.999963	0.805638	0.950269	0.801477	0.562811	0.645481	0.999996	0.92531	0.960815
Fam220a	2810453I06RIK	#N/A	#N/A	0.124234	0.0245221	0.114924	0.130099	0.438557	0.99395	0.438741	0.999925	0.426345	0.29294	0.999936	0.999956	0.999914	0.996566	0.193185	0.994394	0.974274	0.519586	0.503095	0.0536591	0.191701	0.999996	0.999842	0.999954	0.963213	0.999939	0.938581	0.949273	0.533952	0.0780223	0.546616	0.999967	0.947682	0.999951	0.66909	0.201096	0.654599	0.999963	0.775838	0.960042	0.149726	0.148957	0.153868	0.999996	0.723385	0.932819
Ddx19b	2810457M08RIK	#N/A	#N/A	0.770555	0.751373	0.137482	0.778174	0.756596	0.774012	0.370662	0.999925	0.962967	0.328042	0.999936	0.999956	0.973675	0.996566	0.771851	0.383051	0.769339	0.76041	0.381537	0.775785	0.762984	0.999996	0.777727	0.896904	0.984983	0.999939	0.971714	0.973317	0.989265	0.982583	0.391239	0.999967	0.999993	0.999951	0.406406	0.409543	0.998063	0.999963	0.807921	0.999961	0.685885	0.684724	0.677538	0.999996	0.92531	0.960815
Mon1a	2810468K17RIK	#N/A	#N/A	0.994675	0.0409524	0.281169	0.990219	0.273936	0.286925	0.280048	0.999925	0.534529	0.501483	0.999936	0.999956	0.907207	0.996566	0.662752	0.600835	0.645144	0.148121	0.151094	0.0192733	0.657943	0.999996	0.883857	0.839824	0.946978	0.999939	0.876678	0.973317	0.311284	0.342788	0.325486	0.999967	0.947682	0.999951	0.141216	0.136419	0.137781	0.999963	0.772765	0.950269	0.521738	0.0752947	0.519978	0.999996	0.57276	0.960815
Ndc1	2810475A17RIK	#N/A	#N/A	0.114412	0.747026	0.334398	0.755428	0.741765	0.112602	0.335272	0.999925	0.962967	0.549431	0.999936	0.999956	0.874503	0.996566	0.348019	0.348696	0.748312	0.120454	0.34694	0.345558	0.350387	0.999996	0.767412	0.893047	0.946978	0.999939	0.938581	0.949273	0.361998	0.35641	0.361313	0.999967	0.947682	0.999951	0.998797	0.996497	0.0906184	0.999963	0.999992	0.950269	0.196882	0.196565	0.653566	0.999996	0.748649	0.960815
Mtarc2	2810484M10RIK	#N/A	#N/A	0.704051	0.67716	0.690266	0.24647	0.249111	0.707283	0.694482	0.999925	0.962967	0.83108	0.999936	0.999956	0.973675	0.996566	0.726986	0.735126	0.0926421	0.311538	0.30391	0.722103	0.735207	0.999996	0.932672	0.364226	0.946978	0.999939	0.971638	0.973317	0.304232	0.977884	0.298334	0.999967	0.999993	0.999951	0.397406	0.991435	0.40661	0.999963	0.999992	0.950269	0.568964	0.564878	0.572043	0.999996	0.92531	0.960815
Fam76b	2810485I05RIK	#N/A	#N/A	0.130929	0.430496	0.219689	0.704463	0.969277	0.70952	0.740379	0.999925	0.898124	0.433266	0.999936	0.999956	0.973675	0.996566	0.836691	0.757265	0.441351	0.0372572	0.162464	0.375646	0.161112	0.999996	0.932672	0.719774	0.946978	0.999939	0.938581	0.949273	0.282134	0.759641	0.971966	0.999967	0.989164	0.999951	0.363935	0.659665	0.0139676	0.999963	0.903977	0.795409	0.295226	0.435591	0.631992	0.999996	0.841091	0.960815
Ttc33	2900001O04RIK	#N/A	#N/A	0.204891	0.987628	0.889877	0.889248	0.983561	0.164643	0.241876	0.999925	0.999976	0.958843	0.999936	0.999956	0.907207	0.996566	0.181356	0.997541	0.96966	0.919654	0.949809	0.173924	0.261064	0.999996	0.999842	0.999954	0.999974	0.999939	0.938581	0.949273	0.371022	0.314107	0.349695	0.999967	0.947682	0.999951	0.321321	0.335386	0.385748	0.999963	0.805638	0.950269	0.376144	0.344626	0.476912	0.999996	0.817341	0.960815
Rilpl1	2900002H16RIK	#N/A	#N/A	0.986457	0.971333	0.157379	0.181331	0.983552	0.99402	0.1658	0.999925	0.999976	0.355626	0.999936	0.999956	0.999914	0.996566	0.336867	0.320049	0.319983	0.302521	0.311362	0.301301	0.337043	0.999996	0.763416	0.624891	0.946978	0.999939	0.938581	0.949273	0.998558	0.982803	0.182733	0.999967	0.999993	0.999951	0.331008	0.317847	0.326597	0.999963	0.805638	0.950269	0.484967	0.596013	0.343159	0.999996	0.92531	0.932819
Lrrc47	2900010D03RIK	#N/A	#N/A	0.66452	0.175315	0.720616	0.577875	0.655932	0.801602	0.302544	0.999925	0.808465	0.851554	0.999936	0.999956	0.980948	0.996566	0.482923	0.172127	0.281579	0.723322	0.813872	0.852313	0.182887	0.999996	0.646104	0.601387	0.984983	0.999939	0.997419	0.949273	0.992318	0.200264	0.697521	0.999967	0.947682	0.999951	0.666559	0.160438	0.364681	0.999963	0.775838	0.950269	0.581934	0.483577	0.323117	0.999996	0.883028	0.932819
Uqcc2	2900010M23RIK	#N/A	#N/A	0.614592	0.564705	0.0885913	0.577215	0.597023	0.955954	0.899068	0.999925	0.92607	0.246892	0.999936	0.999956	0.999914	0.999982	0.389715	0.295021	0.871835	0.404566	0.710843	0.764175	0.985193	0.999996	0.756657	0.956545	0.955611	0.999939	0.971638	0.999915	0.987069	0.738633	0.782396	0.999967	0.981949	0.999951	0.708994	0.312383	0.519421	0.999963	0.805638	0.960042	0.42162	0.620842	0.592104	0.999996	0.92531	0.960815
Yju2	2900016D05RIK	#N/A	#N/A	0.749505	0.757911	0.369946	0.776908	0.143105	0.771949	0.769447	0.999925	0.962967	0.576741	0.999936	0.999956	0.973675	0.996566	0.231185	0.537639	0.538204	0.226589	0.989122	0.550053	0.222904	0.999996	0.856923	0.779579	0.946978	0.999939	0.953346	0.949273	0.195179	0.660678	0.672157	0.999967	0.961605	0.999951	0.359988	0.362684	0.0769463	0.999963	0.805638	0.950269	0.436343	0.990117	0.994765	0.999996	0.999976	0.999996
Dipk1a	2900024C23RIK	#N/A	#N/A	0.502126	0.460638	0.504165	0.64933	0.863024	0.134617	0.851427	0.999925	0.914497	0.694739	0.999936	0.999956	0.904639	0.999982	0.314301	0.250194	0.377626	0.352821	0.334967	0.336871	0.325512	0.999996	0.728261	0.660426	0.946978	0.999939	0.938581	0.949273	0.601823	0.629396	0.868174	0.999967	0.961605	0.999951	0.331287	0.29854	0.345526	0.999963	0.805638	0.950269	0.67887	0.0748241	0.595928	0.999996	0.57276	0.960815
Mblac2	2900024O10RIK	#N/A	#N/A	0.72448	0.953965	0.018502	0.724279	0.21728	0.0708388	0.436859	0.999925	0.999976	0.083466	0.999936	0.999956	0.824503	0.996566	0.225507	0.0482806	0.344989	0.488148	0.876093	0.626822	0.777298	0.999996	0.418649	0.642476	0.963213	0.999939	0.970749	0.973803	0.4663	0.130823	0.726028	0.999967	0.947682	0.999951	0.468625	0.0990777	0.778261	0.999963	0.73239	0.991718	0.325843	0.272309	0.483175	0.999996	0.817341	0.960815
Tppp	2900041A09RIK	#N/A	#N/A	0.27629	0.0144546	0.701965	0.276715	0.284079	0.0756739	0.277882	0.999925	0.343617	0.838003	0.999936	0.999956	0.827799	0.996566	0.435242	0.00340074	0.000377993	0.999465	0.446571	0.118936	0.9982	0.999996	0.0916603	0.0164196	0.999974	0.999939	0.938581	0.999915	0.174898	0.634329	0.172433	0.999967	0.961605	0.999951	0.301355	0.30102	0.999141	0.999963	0.805638	0.999961	0.988764	0.0030217	0.998303	0.999996	0.117453	0.999996
Setd5	2900045N06RIK	#N/A	#N/A	0.948903	0.959685	0.988846	0.973669	0.0550229	0.987381	0.996532	0.999925	0.999976	0.999944	0.999936	0.999956	0.999914	0.999982	0.985245	0.419328	0.393913	0.994394	0.10624	0.387991	0.980186	0.999996	0.802744	0.67599	0.999974	0.999939	0.938581	0.999915	0.164119	0.980499	0.983908	0.999967	0.999993	0.999951	0.306894	0.30343	0.991147	0.999963	0.805638	0.999961	0.193178	0.962974	0.979155	0.999996	0.999976	0.999996
Appl1	2900057D21RIK	#N/A	#N/A	0.699047	0.688177	0.161976	0.50399	0.868955	0.579597	0.270044	0.999925	0.962967	0.361853	0.999936	0.999956	0.95081	0.996566	0.0840192	0.267053	0.913299	0.550023	0.134005	0.944812	0.281817	0.999996	0.741225	0.981954	0.963213	0.999939	0.999994	0.949273	0.752757	0.930114	0.315732	0.999967	0.999993	0.999951	0.0650646	0.484669	0.325976	0.999963	0.858337	0.950269	0.824503	0.345648	0.658878	0.999996	0.817341	0.960815
Emc7	2900064A13RIK	#N/A	#N/A	0.712722	0.924113	0.218031	0.491766	0.830357	0.446231	0.856116	0.999925	0.999976	0.431288	0.999936	0.999956	0.935832	0.999982	0.501836	0.940325	0.698083	0.532842	0.588802	0.509183	0.84956	0.999996	0.999842	0.869517	0.963213	0.999939	0.953346	0.999589	0.689206	0.64603	0.551164	0.999967	0.961605	0.999951	0.457589	0.717803	0.616684	0.999963	0.914077	0.960042	0.912035	0.540142	0.716165	0.999996	0.916942	0.96592
Glrx5	2900070E19RIK	#N/A	#N/A	0.615842	0.745822	0.00221304	0.467154	0.627975	0.561809	0.133486	0.999925	0.962967	0.0169636	0.999936	0.999956	0.9475	0.996566	0.529538	0.547669	0.224361	0.123633	0.538116	0.201561	0.339994	0.999996	0.85843	0.542799	0.946978	0.999939	0.938581	0.949273	0.404645	0.826483	0.0682018	0.999967	0.999993	0.999951	0.434462	0.240773	0.123671	0.999963	0.805638	0.950269	0.991581	0.582301	0.627975	0.999996	0.92531	0.960815
Urm1	2900073H19RIK	#N/A	#N/A	0.987999	0.181037	0.978487	0.999819	0.137172	0.998564	0.147435	0.999925	0.813797	0.999944	0.999936	0.999956	0.999914	0.996566	0.98583	0.0419635	0.272316	0.994323	0.269835	0.286451	0.273302	0.999996	0.395845	0.592743	0.999974	0.999939	0.938581	0.949273	0.29152	0.347762	0.308497	0.999967	0.947682	0.999951	0.522312	0.0761644	0.52139	0.999963	0.708	0.960042	0.302497	0.348224	0.310345	0.999996	0.817341	0.932819
Pus7l	3000003F02RIK	#N/A	#N/A	0.48204	0.479249	0.0407433	0.159961	0.976509	0.163822	0.48477	0.999925	0.922549	0.145336	0.999936	0.999956	0.907207	0.996566	0.460227	0.998176	0.466762	0.447801	0.982632	0.457227	0.139548	0.999996	0.999842	0.74193	0.963213	0.999939	0.953346	0.949273	0.660746	0.214706	0.664679	0.999967	0.947682	0.999951	0.638346	0.646687	0.648265	0.999963	0.903977	0.960042	0.55128	0.535513	0.0734281	0.999996	0.916942	0.932819
Mrnip	3010026O09RIK	#N/A	#N/A	0.16385	0.39197	0.985751	0.654285	0.625955	0.299807	0.678481	0.999925	0.874724	0.999944	0.999936	0.999956	0.907207	0.996566	0.4514	0.554518	0.34793	0.0644901	0.385828	0.30236	0.25084	0.999996	0.859984	0.644256	0.946978	0.999939	0.938581	0.949273	0.473268	0.885296	0.979163	0.999967	0.999993	0.999951	0.938879	0.767519	0.0564309	0.999963	0.940245	0.950269	0.232565	0.231497	0.581012	0.999996	0.782547	0.960815
Rps9	3010033P07RIK	#N/A	#N/A	0.943507	0.186493	0.00553343	0.403202	0.79461	0.144961	0.29815	0.999925	0.821447	0.0340034	0.999936	0.999956	0.907207	0.996566	0.2148	0.919544	0.436067	0.719097	0.345837	0.0166065	0.171607	0.999996	0.999842	0.715528	0.984983	0.999939	0.876678	0.949273	0.889597	0.916669	0.87853	0.999967	0.999993	0.999951	0.14913	0.1175	0.490209	0.999963	0.753564	0.960042	0.823285	0.0710698	0.213705	0.999996	0.568482	0.932819
Rbm42	3100004P22RIK	#N/A	#N/A	0.875082	0.663503	0.00420713	0.594303	0.807446	0.451885	0.221767	0.999925	0.962967	0.0278215	0.999936	0.999956	0.939109	0.996566	0.365757	0.945073	0.101746	0.444319	0.330468	0.372968	0.842227	0.999996	0.999842	0.381112	0.963213	0.999939	0.938581	0.996645	0.793934	0.834886	0.25823	0.999967	0.999993	0.999951	0.279175	0.630566	0.574469	0.999963	0.903977	0.960042	0.947208	0.368552	0.592805	0.999996	0.817341	0.960815
Fam107b	3110001A13RIK	#N/A	#N/A	0.0873057	0.348907	0.689404	0.394152	0.83022	0.157742	0.539185	0.999925	0.861222	0.830446	0.999936	0.999956	0.907207	0.996566	0.228023	0.816984	0.0267273	0.951137	0.812159	0.813966	0.771874	0.999996	0.951279	0.195825	0.999974	0.999939	0.984301	0.973317	0.185153	0.113075	0.314641	0.999967	0.947682	0.999951	0.517901	0.997942	0.815918	0.999963	0.999992	0.999961	0.284745	0.72748	0.864197	0.999996	0.943718	0.999996
Dmac1	3110001D03RIK	#N/A	#N/A	0.820845	0.0610247	0.0182464	0.415459	0.408234	0.114966	0.849243	0.999925	0.628862	0.0825322	0.999936	0.999956	0.87563	0.999982	0.868517	0.349599	0.579561	0.156666	0.485844	0.510419	0.584141	0.999996	0.767412	0.794966	0.946978	0.999939	0.953346	0.964674	0.476331	0.0268982	0.670632	0.999967	0.947682	0.999951	0.592459	0.326802	0.22753	0.999963	0.805638	0.950269	0.661034	0.816856	0.46709	0.999996	0.982696	0.960815
Rnf168	3110001H15RIK	#N/A	#N/A	0.996116	0.998575	0.066173	0.210922	0.531674	0.53939	0.5233	0.999925	0.999976	0.204029	0.999936	0.999956	0.9475	0.996566	0.517921	0.992185	0.519875	0.51752	0.203689	0.521368	0.994777	0.999996	0.999842	0.770027	0.963213	0.999939	0.953346	0.999915	0.673256	0.682226	0.213498	0.999967	0.961605	0.999951	0.197395	0.656155	0.654812	0.999963	0.903977	0.960042	0.646282	0.649003	0.644266	0.999996	0.92531	0.960815
Rpl22l1	3110001N18RIK	#N/A	#N/A	0.573384	0.555735	0.55835	0.552921	0.588916	0.598208	0.101794	0.999925	0.922549	0.727765	0.999936	0.999956	0.955137	0.996566	0.570451	0.0966268	0.574296	0.591819	0.592896	0.562336	0.591686	0.999996	0.527762	0.792257	0.969409	0.999939	0.956624	0.964674	0.988902	0.969542	0.17982	0.999967	0.999993	0.999951	0.983979	0.17779	0.999906	0.999963	0.775838	0.999961	0.351211	0.345818	0.363942	0.999996	0.817341	0.932819
Cep57	3110002L15RIK	#N/A	#N/A	0.453592	0.453553	0.460273	0.996398	0.987445	0.14091	0.457472	0.999925	0.911202	0.658807	0.999936	0.999956	0.905524	0.996566	0.436387	0.988212	0.125225	0.12733	0.128726	0.0256549	0.441273	0.999996	0.999842	0.419038	0.946978	0.999939	0.902034	0.958875	0.63577	0.64599	0.647497	0.999967	0.961605	0.999951	0.154092	0.157754	0.154507	0.999963	0.775838	0.950269	0.542725	0.0756872	0.535319	0.999996	0.57276	0.960815
Med31	3110004H13RIK	#N/A	#N/A	0.525092	0.218602	0.531861	0.999396	0.0674568	0.997607	0.219348	0.999925	0.858301	0.714156	0.999936	0.999956	0.999914	0.996566	0.753538	0.363791	0.361669	0.757804	0.134119	0.761199	0.368301	0.999996	0.769709	0.651597	0.984983	0.999939	0.971638	0.949273	0.0769439	0.364455	0.364388	0.999967	0.947682	0.999951	0.197745	0.661796	0.668602	0.999963	0.903977	0.960042	0.411839	0.409041	0.410625	0.999996	0.82743	0.932819
Slc22a23	3110004L20RIK	#N/A	#N/A	0.926582	0.751424	0.00375453	0.622218	0.64278	0.180259	0.15817	0.999925	0.962967	0.0255294	0.999936	0.999956	0.907207	0.996566	0.444837	0.0513282	0.0261644	0.0890401	0.699317	0.349058	0.438334	0.999996	0.428654	0.193985	0.946978	0.999939	0.938581	0.958875	0.749487	0.342584	0.277314	0.999967	0.947682	0.999951	0.506926	0.101782	0.157928	0.999963	0.739277	0.950269	0.714574	0.313035	0.361354	0.999996	0.817341	0.932819
Tmem192	3110005G23RIK	#N/A	#N/A	0.503297	0.953797	0.451684	0.746239	0.612518	0.161866	0.484692	0.999925	0.999976	0.651647	0.999936	0.999956	0.907207	0.996566	0.856577	0.783227	0.410209	0.805471	0.257865	0.172446	0.168647	0.999996	0.933819	0.691697	0.994238	0.999939	0.938581	0.949273	0.903086	0.319737	0.779648	0.999967	0.947682	0.999951	0.3917	0.325188	0.152072	0.999963	0.805638	0.950269	0.435852	0.331142	0.497042	0.999996	0.817341	0.960815
3110009E18Rik	3110009E18RIK	#N/A	#N/A	0.284257	0.372462	0.213675	0.294196	0.367924	0.280786	0.344437	0.999925	0.865667	0.428153	0.999936	0.999956	0.907207	0.996566	0.466899	0.920556	0.763351	0.660457	0.486984	0.10322	0.669021	0.999996	0.999842	0.894941	0.984983	0.999939	0.938581	0.973317	0.329973	0.330138	0.324445	0.999967	0.947682	0.999951	0.982066	0.237358	0.993525	0.999963	0.805638	0.999961	0.312147	0.269782	0.534865	0.999996	0.817341	0.960815
Tgfbrap1	3110018K12RIK	#N/A	#N/A	0.711607	0.987699	0.0829479	0.116842	0.5622	0.953077	0.279161	0.999925	0.999976	0.23637	0.999936	0.999956	0.999914	0.996566	0.839453	0.752261	0.267325	0.417092	0.449902	0.719262	0.0637736	0.999996	0.932672	0.589074	0.963213	0.999939	0.971638	0.949273	0.893225	0.962315	0.74748	0.999967	0.999993	0.999951	0.721991	0.665938	0.488381	0.999963	0.903977	0.960042	0.455061	0.972547	0.0457346	0.999996	0.999976	0.932819
Ccdc137	3110023B02RIK	#N/A	#N/A	0.760673	0.743541	0.765938	0.37342	0.735621	0.38785	0.755286	0.999925	0.962967	0.871703	0.999936	0.999956	0.907207	0.996566	0.710855	0.343846	0.315037	0.32959	0.736871	0.720815	0.734208	0.999996	0.767412	0.621462	0.946978	0.999939	0.971638	0.973317	0.98142	0.405842	0.401433	0.999967	0.947682	0.999951	0.978006	0.307276	0.303338	0.999963	0.805638	0.950269	0.653566	0.705253	0.683387	0.999996	0.931229	0.960815
3110040N11Rik	3110040N11RIK	#N/A	#N/A	0.526733	0.537989	0.970286	0.212334	0.51395	0.0725411	0.973029	0.999925	0.922549	0.999944	0.999936	0.999956	0.824894	0.999982	0.568873	0.558742	0.9945	0.970107	0.556023	0.552422	0.23014	0.999996	0.860737	0.999954	0.999974	0.999939	0.953614	0.949273	0.347489	0.0834637	0.370167	0.999967	0.947682	0.999951	0.414719	0.994619	0.408935	0.999963	0.999992	0.950269	0.989373	0.417108	0.390967	0.999996	0.829424	0.932819
Pbld2	3110049J23RIK	#N/A	#N/A	0.809503	0.0613195	0.668204	0.216142	0.642064	0.829593	0.0977697	0.999925	0.628862	0.814633	0.999936	0.999956	0.995001	0.996566	0.287359	0.23757	0.0553401	0.999977	0.502575	0.0367212	0.102236	0.999996	0.70948	0.28145	0.999977	0.999939	0.938581	0.949273	0.88002	0.163036	0.767299	0.999967	0.947682	0.999951	0.354933	0.0857155	0.376013	0.999963	0.721568	0.950269	0.605281	0.220584	0.0431512	0.999996	0.77138	0.932819
Zc3h13	3110050K21RIK	#N/A	#N/A	0.0677739	0.253056	0.882202	0.554124	0.0704594	0.195207	0.609578	0.999925	0.861222	0.953601	0.999936	0.999956	0.907207	0.996566	0.0695795	0.0157867	0.0515167	0.917308	0.0996403	0.852815	0.856207	0.999996	0.247443	0.271244	0.999974	0.999939	0.997824	0.999915	0.987882	0.899572	0.382732	0.999967	0.999993	0.999951	0.893303	0.0570095	0.832204	0.999963	0.689226	0.999961	0.0290216	0.132431	0.958886	0.999996	0.694556	0.999996
Zc2hc1a	3110050N22RIK	#N/A	#N/A	0.0991396	0.0782891	0.0736086	0.112794	0.125119	0.151855	0.115929	0.999925	0.68146	0.219386	0.999936	0.999956	0.907207	0.996566	0.133748	0.00024776	0.757443	0.575628	0.854289	0.444195	0.447224	0.999996	0.0144514	0.894714	0.965349	0.999939	0.953346	0.958875	0.120859	0.119424	0.123709	0.999967	0.947682	0.999951	0.391498	0.0446456	0.397788	0.999963	0.635601	0.950269	0.196903	0.00148923	0.875404	0.999996	0.0703724	0.999996
Hdhd2	3110052N05RIK	#N/A	#N/A	0.343845	0.442431	0.202096	0.496238	0.467268	0.267486	0.480889	0.999925	0.90173	0.41422	0.999936	0.999956	0.907207	0.996566	0.625009	0.080633	0.401975	0.692273	0.613434	0.503688	0.670243	0.999996	0.497129	0.6841	0.984983	0.999939	0.953346	0.973317	0.359379	0.160838	0.918083	0.999967	0.947682	0.999951	0.991924	0.14494	0.985248	0.999963	0.775838	0.999961	0.405514	0.351343	0.490475	0.999996	0.817341	0.960815
Sppl2b	3110056O03RIK	#N/A	#N/A	0.267238	0.174841	0.337108	0.0200848	0.579757	0.96542	0.00979062	0.999925	0.808409	0.551076	0.999936	0.999956	0.999914	0.996566	0.429918	0.086609	0.773318	0.0177663	0.918396	0.985144	0.000535708	0.999996	0.510357	0.898194	0.946978	0.999939	0.999994	0.627272	0.312227	0.418468	0.855134	0.999967	0.947682	0.999951	0.525764	0.217483	0.346911	0.999963	0.784411	0.950269	0.634466	0.240974	0.000429975	0.999996	0.79259	0.680015
Abhd18	3110057O12RIK	#N/A	#N/A	0.994718	0.984327	0.990571	0.998596	0.241513	0.235113	0.223475	0.999925	0.999976	0.999944	0.999936	0.999956	0.907207	0.996566	0.559422	0.961696	0.196992	0.546759	0.540078	0.21632	0.515425	0.999996	0.999842	0.512936	0.963213	0.999939	0.938581	0.958875	0.410132	0.398832	0.395182	0.999967	0.947682	0.999951	0.983366	0.360637	0.972565	0.999963	0.805638	0.999961	0.412299	0.410905	0.390879	0.999996	0.828138	0.932819
3110082I17Rik	3110082I17RIK	#N/A	#N/A	0.985993	0.126539	0.115568	0.984413	0.970602	0.976974	0.98075	0.999925	0.759524	0.294171	0.999936	0.999956	0.999914	0.999982	0.543023	0.529506	0.53861	0.557581	0.532682	0.535852	0.534003	0.999996	0.856548	0.779579	0.963213	0.999939	0.953346	0.958875	0.960077	0.157868	0.996629	0.999967	0.947682	0.999951	0.402252	0.994667	0.411262	0.999963	0.999992	0.950269	0.99093	0.374222	0.979479	0.999996	0.81906	0.999996
Oser1	3230401D17RIK	#N/A	#N/A	0.288875	0.32102	0.294699	0.340524	0.3262	0.292738	0.327289	0.999925	0.861222	0.515343	0.999936	0.999956	0.907207	0.996566	0.659357	0.67303	0.867597	0.876934	0.429652	0.607737	0.795887	0.999996	0.917444	0.955239	0.999974	0.999939	0.963347	0.98118	0.314196	0.313712	0.340506	0.999967	0.947682	0.999951	0.783144	0.942755	0.935208	0.999963	0.999992	0.999961	0.432623	0.550016	0.790904	0.999996	0.924006	0.991222
Ears2	3230401I01RIK	#N/A	#N/A	0.981067	0.739322	0.169243	0.286641	0.816598	0.785683	0.641542	0.999925	0.962967	0.372567	0.999936	0.999956	0.97635	0.996566	0.849176	0.521715	0.367474	0.601667	0.656146	0.92026	0.177121	0.999996	0.856548	0.65557	0.971921	0.999939	0.999994	0.949273	0.85986	0.966418	0.674987	0.999967	0.999993	0.999951	0.54627	0.606201	0.424261	0.999963	0.903977	0.952642	0.881967	0.667034	0.280685	0.999996	0.92531	0.932819
Snrnp25	3300001G02RIK	#N/A	#N/A	0.994476	0.0456303	0.0338675	0.476582	0.457772	0.658963	0.131898	0.999925	0.554847	0.12815	0.999936	0.999956	0.973675	0.996566	0.402056	0.36074	0.892074	0.540254	0.890192	0.16054	0.878582	0.999996	0.769017	0.967072	0.963213	0.999939	0.938581	0.999915	0.548571	0.197325	0.0805707	0.999967	0.947682	0.999951	0.470592	0.708335	0.73257	0.999963	0.909247	0.974853	0.639456	0.131479	0.610273	0.999996	0.694428	0.960815
Trmt6	3300001M20RIK	#N/A	#N/A	0.54055	0.530955	0.537482	0.539241	0.553754	0.0739562	0.540779	0.999925	0.922549	0.716642	0.999936	0.999956	0.824894	0.996566	0.372058	0.368062	0.761198	0.767877	0.777969	0.140351	0.76613	0.999996	0.769709	0.894714	0.984983	0.999939	0.938581	0.973317	0.989073	0.41468	0.405363	0.999967	0.947682	0.999951	0.680058	0.690741	0.691382	0.999963	0.904336	0.960042	0.390177	0.0906792	0.998652	0.999996	0.608032	0.999996
Luc7l3	3300001P08RIK	#N/A	#N/A	0.467994	0.279029	0.990498	0.949076	0.435861	0.663911	0.154794	0.999925	0.861222	0.999944	0.999936	0.999956	0.973675	0.996566	0.0691789	0.127105	0.746775	0.317603	0.783599	0.957153	0.561895	0.999996	0.588323	0.892988	0.946978	0.999939	0.999994	0.962047	0.964951	0.595541	0.271651	0.999967	0.961605	0.999951	0.0692568	0.191138	0.703604	0.999963	0.775838	0.962804	0.349895	0.344947	0.350507	0.999996	0.817341	0.932819
Zmynd8	3632413B07RIK	#N/A	#N/A	0.973877	0.596014	0.0332824	0.492788	0.300405	0.446582	0.73697	0.999925	0.932902	0.126382	0.999936	0.999956	0.93611	0.996566	0.553876	0.377445	0.730751	0.759134	0.818403	0.285417	0.599004	0.999996	0.773889	0.885752	0.984983	0.999939	0.938581	0.967346	0.368005	0.281503	0.765822	0.999967	0.947682	0.999951	0.810375	0.206086	0.884526	0.999963	0.776775	0.999961	0.538158	0.886458	0.533032	0.999996	0.999976	0.960815
Rnf145	3732413I11RIK	#N/A	#N/A	0.318785	0.0977648	0.32133	0.719911	0.34273	0.1221	0.35491	0.999925	0.729856	0.538628	0.999936	0.999956	0.887139	0.996566	0.358896	0.0400329	0.0409258	0.917967	0.315463	0.274715	0.50551	0.999996	0.387601	0.242413	0.999974	0.999939	0.938581	0.958875	0.963877	0.914623	0.245763	0.999967	0.999993	0.999951	0.937234	0.368439	0.494624	0.999963	0.805674	0.960042	0.25779	0.0681349	0.736315	0.999996	0.55901	0.975359
Zfp738	3830402I07RIK	#N/A	#N/A	0.983576	0.153386	0.98985	0.958195	0.173723	0.959181	0.135765	0.999925	0.795265	0.999944	0.999936	0.999956	0.999914	0.996566	0.320148	0.353498	0.380496	0.274073	0.330747	0.299708	0.268281	0.999996	0.767956	0.66327	0.946978	0.999939	0.938581	0.949273	0.347445	0.300808	0.312221	0.999967	0.947682	0.999951	0.800941	0.21209	0.875539	0.999963	0.780811	0.999961	0.33235	0.332773	0.278924	0.999996	0.817341	0.932819
3830406C13Rik	3830406C13RIK	#N/A	#N/A	0.738018	0.676056	0.779008	0.279506	0.720758	0.339039	0.76073	0.999925	0.962967	0.876972	0.999936	0.999956	0.907207	0.996566	0.4419	0.509732	0.0812251	0.422022	0.946816	0.998755	0.88361	0.999996	0.853861	0.342614	0.963213	0.999939	0.999994	0.999915	0.986361	0.313167	0.308174	0.999967	0.947682	0.999951	0.423608	0.451718	0.453379	0.999963	0.834991	0.960042	0.645217	0.716974	0.60131	0.999996	0.939326	0.960815
Nipa2	3830408P04RIK	#N/A	#N/A	0.670806	0.683308	0.144533	0.960305	0.314154	0.818609	0.801461	0.999925	0.962967	0.338333	0.999936	0.999956	0.988358	0.999982	0.562208	0.360436	0.736312	0.978286	0.936266	0.444437	0.885137	0.999996	0.769017	0.888396	0.999974	0.999939	0.953346	0.999915	0.234723	0.591991	0.799423	0.999967	0.961605	0.999951	0.652245	0.257874	0.936085	0.999963	0.805638	0.999961	0.71851	0.912581	0.901531	0.999996	0.999976	0.999996
Insc	3830422K02RIK	#N/A	#N/A	0.21252	0.87859	6.00357e-06	0.884119	0.542207	0.282823	0.786854	0.999925	0.999976	0.000160081	0.999936	0.999956	0.907207	0.996762	0.299245	0.0501109	0.00456866	0.238487	0.768536	0.261339	0.27478	0.999996	0.425399	0.0764789	0.946978	0.999939	0.938581	0.949273	0.68597	0.564059	0.795615	0.999967	0.961605	0.999951	0.679607	0.0969042	0.217904	0.999963	0.727692	0.950269	0.137963	0.317985	0.918457	0.999996	0.817341	0.999996
Glyr1	3930401K13RIK	#N/A	#N/A	0.372717	0.313294	0.345628	0.278327	0.296484	0.318424	0.36607	0.999925	0.861222	0.557215	0.999936	0.999956	0.907207	0.996566	0.328647	0.951636	0.243823	0.65381	0.381986	0.848792	0.0865232	0.999996	0.999842	0.562194	0.984983	0.999939	0.996397	0.949273	0.339548	0.322536	0.326762	0.999967	0.947682	0.999951	0.941029	0.859107	0.362744	0.999963	0.989566	0.950269	0.205699	0.927798	0.138375	0.999996	0.999976	0.932819
Zbtb9	3930402F13RIK	#N/A	#N/A	0.734102	0.0950197	0.314261	0.0226651	0.315172	0.0960261	0.731385	0.999925	0.729856	0.53288	0.999936	0.999956	0.851666	0.996566	0.76297	0.750879	0.364868	0.359701	0.363295	0.754563	0.134164	0.999996	0.932672	0.654368	0.946978	0.999939	0.971638	0.949273	0.605236	0.0166859	0.130616	0.999967	0.947682	0.999951	0.675376	0.666802	0.680575	0.999963	0.903977	0.960042	0.386843	0.997207	0.0925793	0.999996	0.999976	0.932819
Msl1	4121402D02RIK	#N/A	#N/A	0.70172	0.691465	0.744996	0.709984	0.738598	0.294959	0.299225	0.999925	0.962967	0.863792	0.999936	0.999956	0.907207	0.996566	0.46114	0.156908	0.495177	0.997498	0.491571	0.980224	0.158823	0.999996	0.633294	0.759346	0.999974	0.999939	0.999994	0.949273	0.637464	0.664898	0.657498	0.999967	0.961605	0.999951	0.350095	0.355707	0.348766	0.999963	0.805638	0.950269	0.970286	0.28231	0.293486	0.999996	0.817341	0.932819
Narf	4430402O11RIK	#N/A	#N/A	0.983418	0.308284	0.00415143	0.72268	0.0342766	0.169703	0.831979	0.999925	0.861222	0.0276185	0.999936	0.999956	0.907207	0.999982	0.0679662	0.000805584	0.798609	0.00934558	0.523791	0.358844	0.0421406	0.999996	0.0336005	0.910574	0.928109	0.999939	0.938581	0.932225	0.207624	0.827471	0.932214	0.999967	0.999993	0.999951	0.43642	0.00901431	0.00643586	0.999963	0.323562	0.621499	0.0601535	0.0419417	0.6114	0.999996	0.458289	0.960815
Tmem186	4432406C05RIK	#N/A	#N/A	0.432102	0.0680396	0.322856	0.621138	0.482478	0.848122	0.686302	0.999925	0.655463	0.539308	0.999936	0.999956	0.999914	0.996566	0.547069	0.088151	0.340444	0.69095	0.348001	0.998682	0.593974	0.999996	0.513771	0.639597	0.984983	0.999939	0.999994	0.965549	0.954417	0.174422	0.950954	0.999967	0.947682	0.999951	0.811341	0.231924	0.924011	0.999963	0.800336	0.999961	0.285103	0.231088	0.515088	0.999996	0.782137	0.960815
Nxpe2	4432416J03RIK	#N/A	#N/A	0.257827	4.48852e-05	0.335896	0.829058	0.640481	0.143197	0.555769	0.999925	0.00755444	0.549955	0.999936	0.999956	0.906795	0.996566	0.293873	0.107167	0.00753844	0.176322	0.61415	0.15216	0.317245	0.999996	0.552457	0.101045	0.946978	0.999939	0.938581	0.949273	0.680805	0.00147905	0.623505	0.999967	0.324521	0.999951	0.73933	0.909322	0.164915	0.999963	0.999992	0.950269	0.183127	0.0139978	0.750348	0.999996	0.274316	0.977017
Chst15	4631426J05RIK	#N/A	#N/A	0.358874	0.54098	0.10104	0.502175	0.634988	0.577025	0.98822	0.999925	0.922549	0.270381	0.999936	0.999956	0.95066	0.999982	0.453228	0.362147	0.468214	0.992606	0.251443	0.387978	0.546102	0.999996	0.769709	0.742815	0.999974	0.999939	0.938581	0.958875	0.336367	0.418547	0.632506	0.999967	0.947682	0.999951	0.229729	0.260676	0.693473	0.999963	0.805638	0.960042	0.752144	0.969575	0.643083	0.999996	0.999976	0.960815
Ahcyl2	4631427C17RIK	#N/A	#N/A	0.981749	0.972679	0.98588	0.398093	0.413841	0.385211	0.100277	0.999925	0.999976	0.999944	0.999936	0.999956	0.907207	0.996566	0.451748	0.435896	0.0235417	0.122526	0.131425	0.126106	0.0246155	0.999996	0.815231	0.183086	0.946978	0.999939	0.938581	0.892663	0.559433	0.507695	0.07732	0.999967	0.961605	0.999951	0.134002	0.126393	0.0159085	0.999963	0.755836	0.795409	0.572128	0.574416	0.578869	0.999996	0.92531	0.960815
Fam122b	4632404H22RIK	#N/A	#N/A	0.75679	0.350312	0.752075	0.0352211	0.742549	0.346952	0.765021	0.999925	0.861222	0.867314	0.999936	0.999956	0.907207	0.996566	0.526957	0.518145	0.518901	0.524918	0.514556	0.513773	0.0639147	0.999996	0.855983	0.769426	0.963213	0.999939	0.953346	0.949273	0.654493	0.196506	0.197588	0.999967	0.947682	0.999951	0.359155	0.353772	0.36727	0.999963	0.805638	0.950269	0.989481	0.996272	0.0966839	0.999996	0.999976	0.932819
Crtc2	4632407F12RIK	#N/A	#N/A	0.762351	0.771773	0.763548	0.761567	0.762078	0.131998	0.133623	0.999925	0.963222	0.870992	0.999936	0.999956	0.898358	0.996566	0.72932	0.30019	0.0865448	0.0190142	0.728062	0.299427	0.725146	0.999996	0.759127	0.352314	0.946978	0.999939	0.938581	0.973317	0.999804	0.399472	0.406944	0.999967	0.947682	0.999951	0.998913	0.998913	0.0346013	0.999963	0.999992	0.844412	0.66419	0.201466	0.199888	0.999996	0.750475	0.932819
Ino80	4632409L19RIK	#N/A	#N/A	0.177826	0.0487557	0.999327	0.0481617	0.178335	0.495686	0.491696	0.999925	0.572343	0.999944	0.999936	0.999956	0.9475	0.996566	0.741313	0.0261737	0.74284	0.10434	0.742522	0.744488	0.324524	0.999996	0.322464	0.891791	0.946978	0.999939	0.971638	0.949273	0.076754	0.364175	0.364407	0.999967	0.947682	0.999951	0.661939	0.198	0.65876	0.999963	0.775838	0.960042	0.999048	0.063202	0.0621542	0.999996	0.544661	0.932819
Kansl3	4632411B12RIK	#N/A	#N/A	0.68583	0.857859	0.0192635	0.284217	0.590982	0.151244	0.828259	0.999925	0.990937	0.0860689	0.999936	0.999956	0.907207	0.999982	0.502624	0.0183438	0.000280967	0.966738	0.607684	0.600063	0.291109	0.999996	0.274458	0.0143678	0.999974	0.999939	0.960186	0.949273	0.571199	0.444468	0.438213	0.999967	0.959187	0.999951	0.429945	0.0581403	0.461267	0.999963	0.689226	0.960042	0.90725	0.166031	0.455289	0.999996	0.740575	0.955411
Os9	4632413K17RIK	#N/A	#N/A	0.283617	0.153239	0.913167	0.992889	0.328253	0.731713	0.663872	0.999925	0.795265	0.976609	0.999936	0.999956	0.973675	0.996566	0.253851	0.763111	0.973798	0.84876	0.501157	0.204399	0.852301	0.999996	0.932672	0.999954	0.999974	0.999939	0.938581	0.999915	0.943436	0.4222	0.745626	0.999967	0.947682	0.999951	0.755464	0.523413	0.997643	0.999963	0.881328	0.999961	0.175596	0.236312	0.77383	0.999996	0.788728	0.987196
4632417D23	4632417D23	#N/A	#N/A	0.156354	0.149139	2.35301e-07	0.146897	0.137	0.00137883	0.145946	0.999925	0.794712	1.09115e-05	0.999936	0.999956	0.228764	0.996566	0.988441	0.442964	0.142423	0.454552	0.967562	0.458924	0.452939	0.999996	0.820828	0.442065	0.963213	0.999939	0.953346	0.958875	0.0511774	0.00279735	0.0511774	0.999967	0.46905	0.999951	0.987748	0.987392	0.383141	0.999963	0.999992	0.950269	0.959104	0.171841	0.997989	0.999996	0.740575	0.999996
Fam111a	4632417K18RIK	#N/A	#N/A	0.396831	0.379335	0.000142512	0.0153688	0.403881	0.384004	0.0153685	0.999925	0.869552	0.00209752	0.999936	0.999956	0.907207	0.996566	0.349182	0.0573489	0.371365	0.0653817	0.35633	0.984704	0.0653826	0.999996	0.444894	0.657022	0.946978	0.999939	0.999994	0.949273	0.3003	0.995656	0.00539565	0.999967	0.999993	0.999951	0.224436	0.200871	0.0210999	0.999963	0.775838	0.795409	0.991626	0.16193	0.999996	0.999996	0.738797	0.999996
Sdr42e1	4632417N05RIK	#N/A	#N/A	0.897637	0.389152	0.750162	0.981482	0.839524	0.252417	0.45532	0.999925	0.874724	0.866179	0.999936	0.999956	0.907207	0.996566	0.908167	0.670027	0.135371	0.905974	0.666667	0.483382	0.536881	0.999996	0.917226	0.433273	0.999974	0.999939	0.953346	0.958875	0.952927	0.120271	0.563694	0.999967	0.947682	0.999951	0.683724	0.403675	0.708644	0.999963	0.807921	0.965856	0.834041	0.854315	0.625902	0.999996	0.999864	0.960815
Fhip1b	4632419K20RIK	#N/A	#N/A	0.77908	0.409688	0.000356713	0.266327	0.904501	0.425872	0.884616	0.999925	0.886589	0.00429551	0.999936	0.999956	0.92557	0.999982	0.655928	0.491221	0.627519	0.969575	0.782336	0.472607	0.174612	0.999996	0.847378	0.82731	0.999974	0.999939	0.953346	0.949273	0.788312	0.283319	0.514881	0.999967	0.947682	0.999951	0.611481	0.326422	0.325237	0.999963	0.805638	0.950269	0.905744	0.983181	0.356763	0.999996	0.999976	0.932819
Pex26	4632428M11RIK	#N/A	#N/A	0.533116	0.00564949	0.0101247	0.363558	0.493354	0.00844096	0.0329445	0.999925	0.203871	0.0532861	0.999936	0.999956	0.467018	0.996566	0.240045	0.00033376	2.03853e-06	0.0144108	0.840116	0.04413	0.237601	0.999996	0.0175482	0.000490956	0.946978	0.999939	0.938581	0.949273	0.966069	0.913843	0.0457325	0.999967	0.999993	0.999951	0.480023	0.18107	0.0139776	0.999963	0.775838	0.795409	0.34949	0.000669383	0.355019	0.999996	0.0454119	0.932819
Ddias	4632434I11RIK	#N/A	#N/A	0.0585335	0.341024	3.09402e-05	0.0599738	0.0575847	0.336787	0.0584836	0.999925	0.861222	0.000601561	0.999936	0.999956	0.907207	0.996566	0.294556	0.297573	0.041489	0.988985	0.290766	0.301808	0.978539	0.999996	0.758075	0.243903	0.999974	0.999939	0.938581	0.999915	0.0668939	0.345998	0.0681009	0.999967	0.947682	0.999951	0.300445	0.307367	0.983885	0.999963	0.805638	0.999961	0.823485	0.806358	0.730885	0.999996	0.97629	0.97202
Spryd4	4633402N23RIK	#N/A	#N/A	0.960907	0.991254	0.32679	0.976957	0.316199	0.302561	0.338271	0.999925	0.999976	0.543581	0.999936	0.999956	0.907207	0.996566	0.326932	0.33086	0.323802	0.968029	0.977722	0.944673	0.333448	0.999996	0.763416	0.627657	0.999974	0.999939	0.999994	0.949273	0.545912	0.557444	0.57089	0.999967	0.961605	0.999951	0.562568	0.60343	0.563048	0.999963	0.903977	0.960042	0.348405	0.306735	0.361047	0.999996	0.817341	0.932819
Efcab14	4732418C07RIK	#N/A	#N/A	0.997956	0.997502	0.501174	0.744887	0.761788	0.742996	0.521145	0.999925	0.999976	0.69266	0.999936	0.999956	0.973675	0.996566	0.879794	0.611126	0.406538	0.601232	0.866572	0.864852	0.394879	0.999996	0.889582	0.688882	0.971832	0.999939	0.999994	0.951066	0.814867	0.796521	0.454174	0.999967	0.999993	0.999951	0.988799	0.57187	0.258646	0.999963	0.898267	0.950269	0.844058	0.83446	0.837981	0.999996	0.991337	0.999996
Cd300ld	4732429D16RIK	#N/A	#N/A	0.529478	0.507051	0.0812791	0.555798	0.57706	0.640447	0.572905	0.999925	0.922549	0.233038	0.999936	0.999956	0.973675	0.996566	0.536867	0.000103528	0.000137028	0.0461279	0.437546	0.594783	0.0147936	0.999996	0.00840264	0.00917605	0.946978	0.999939	0.959087	0.871391	0.557096	0.575677	0.568272	0.999967	0.961605	0.999951	0.930519	0.0152291	0.0216269	0.999963	0.416015	0.795409	0.101559	0.000199062	0.545209	0.999996	0.0212228	0.960815
4732433M03	4732433M03	#N/A	#N/A	0.141799	0.038396	0.270238	0.920586	0.866281	0.389608	0.837	0.999925	0.522157	0.490068	0.999936	0.999956	0.907207	0.999982	0.405366	0.297745	0.256491	0.557588	0.439476	0.0688274	0.770716	0.999996	0.758075	0.576909	0.963213	0.999939	0.938581	0.973317	0.30366	0.321188	0.933303	0.999967	0.947682	0.999951	0.963889	0.538901	0.509135	0.999963	0.887392	0.960042	0.297123	0.0689747	0.845555	0.999996	0.55901	0.999996
Dnajc16	4732437J24RIK	#N/A	#N/A	0.202917	0.794154	0.248653	0.995942	0.473504	0.802291	0.32813	0.999925	0.967668	0.466444	0.999936	0.999956	0.98122	0.996566	0.756199	0.550563	0.296729	0.935593	0.0334865	0.541854	0.256583	0.999996	0.858972	0.611373	0.999974	0.999939	0.953346	0.949273	0.7462	0.771412	0.575199	0.999967	0.992011	0.999951	0.24513	0.451851	0.507006	0.999963	0.83503	0.960042	0.0548354	0.991452	0.327293	0.999996	0.999976	0.932819
Simc1	4732471D19RIK	#N/A	#N/A	0.430526	0.98772	0.108613	0.446543	0.451606	0.130255	0.435625	0.999925	0.999976	0.282873	0.999936	0.999956	0.896372	0.996566	0.758535	0.340091	0.751876	0.738895	0.330939	0.739402	0.112211	0.999996	0.766875	0.894182	0.984983	0.999939	0.971638	0.949273	0.974565	0.189519	0.986826	0.999967	0.947682	0.999951	0.647023	0.668554	0.193528	0.999963	0.903977	0.950269	0.359938	0.357525	0.360015	0.999996	0.817341	0.932819
Zfp607a	4732475C15RIK	#N/A	#N/A	0.977353	0.115232	0.113345	0.984603	0.111384	0.110024	0.990133	0.999925	0.741019	0.290803	0.999936	0.999956	0.874503	0.999982	0.193032	0.0616136	0.518987	0.997853	0.996472	0.514825	0.977756	0.999996	0.451	0.769426	0.999974	0.999939	0.953346	0.999915	0.183351	0.983307	0.995256	0.999967	0.999993	0.999951	0.393578	0.413208	0.984094	0.999963	0.810066	0.999961	0.322456	0.0627961	0.984636	0.999996	0.544661	0.999996
Trmt2b	4732479N06RIK	#N/A	#N/A	0.529266	0.0560788	0.18669	0.0507371	0.992135	0.204656	0.983363	0.999925	0.611525	0.395749	0.999936	0.999956	0.907207	0.999982	0.319581	0.773217	0.0852715	0.0787565	0.722131	0.00377997	0.750457	0.999996	0.932758	0.350348	0.946978	0.999939	0.533744	0.973317	0.682684	0.663583	0.213748	0.999967	0.961605	0.999951	0.376894	0.0784879	0.335925	0.999963	0.709424	0.950269	0.626558	0.0194692	0.123656	0.999996	0.323642	0.932819
Snx30	4732481H14RIK	#N/A	#N/A	0.537548	0.55166	0.0849791	0.56856	0.583156	0.557035	0.585035	0.999925	0.922549	0.240415	0.999936	0.999956	0.9475	0.996566	0.312867	0.309134	0.273431	0.323456	0.371677	0.315691	0.303705	0.999996	0.762382	0.593958	0.946978	0.999939	0.938581	0.949273	0.564032	0.558329	0.580489	0.999967	0.961605	0.999951	0.347924	0.319344	0.3204	0.999963	0.805638	0.950269	0.265722	0.893046	0.68689	0.999996	0.999976	0.960815
Rab3gap1	4732493F09RIK	#N/A	#N/A	0.590226	0.330936	0.0461531	0.875235	0.359664	0.797539	0.778493	0.999925	0.861222	0.15846	0.999936	0.999956	0.980148	0.996762	0.210662	0.598242	0.801628	0.654235	0.766975	0.806332	0.56181	0.999996	0.883051	0.913036	0.984983	0.999939	0.981907	0.962047	0.767695	0.345811	0.734909	0.999967	0.947682	0.999951	0.404275	0.806116	0.376788	0.999963	0.960465	0.950269	0.351293	0.641376	0.93589	0.999996	0.92531	0.999996
Tmem184b	4732495E13RIK	#N/A	#N/A	0.310491	0.219755	0.000580176	0.136427	0.294246	0.875567	0.238815	0.999925	0.859468	0.00621463	0.999936	0.999956	0.999914	0.996566	0.33187	0.194471	0.0623402	0.791766	0.235732	0.857598	0.939753	0.999996	0.669197	0.298111	0.989827	0.999939	0.999994	0.999915	0.97847	0.29682	0.053225	0.999967	0.947682	0.999951	0.857307	0.235304	0.878286	0.999963	0.805125	0.999961	0.185024	0.480382	0.831567	0.999996	0.880641	0.999996
Pramel12	4732496O08RIK	#N/A	#N/A	0.0276558	0.163345	0.0275052	0.922608	0.456776	0.899304	0.634944	0.999925	0.800507	0.110287	0.999936	0.999956	0.999914	0.996566	0.288114	0.350205	0.295535	0.343216	0.327346	0.30907	0.353703	0.999996	0.767412	0.611286	0.946978	0.999939	0.938581	0.949273	0.0206864	0.292046	0.634848	0.999967	0.947682	0.999951	0.314487	0.336058	0.354998	0.999963	0.805638	0.950269	0.347526	0.347456	0.815242	0.999996	0.817341	0.999887
Utp6	4732497O03RIK	#N/A	#N/A	0.623473	0.795465	0.0090175	0.461646	0.624197	0.449091	0.103976	0.999925	0.967719	0.0489634	0.999936	0.999956	0.937296	0.996566	0.237745	0.328219	0.200998	0.796854	0.790144	0.151472	0.0514754	0.999996	0.763416	0.51836	0.990725	0.999939	0.938581	0.949273	0.999396	0.456975	0.500926	0.999967	0.961605	0.999951	0.320039	0.10522	0.236491	0.999963	0.74603	0.950269	0.512135	0.736941	0.121098	0.999996	0.947435	0.932819
Dcaf17	4833418A01RIK	#N/A	#N/A	0.550753	0.0736235	0.0691717	0.540249	0.50724	0.0620418	0.540723	0.999925	0.668682	0.210176	0.999936	0.999956	0.80604	0.996566	0.985851	0.305243	0.304146	0.291768	0.29672	0.0381947	0.981031	0.999996	0.761638	0.615215	0.946978	0.999939	0.938581	0.999915	0.163545	0.088497	0.987647	0.999967	0.947682	0.999951	0.341684	0.308195	0.318446	0.999963	0.805638	0.950269	0.533126	0.0767107	0.544708	0.999996	0.57276	0.960815
4833420G17Rik	4833420G17RIK	#N/A	#N/A	0.185295	0.990792	0.497263	0.194443	0.505299	0.495331	0.518764	0.999925	0.999976	0.689684	0.999936	0.999956	0.9475	0.996566	0.225623	0.989653	0.54877	0.227279	0.54839	0.543485	0.553903	0.999996	0.999842	0.782506	0.946978	0.999939	0.953346	0.961506	0.148121	0.606327	0.620913	0.999967	0.961605	0.999951	0.221942	0.683907	0.668256	0.999963	0.903977	0.960042	0.65423	0.655127	0.202983	0.999996	0.92531	0.932819
Dcun1d5	4833420K19RIK	#N/A	#N/A	0.532437	0.564758	0.00289382	0.807453	0.599108	0.48339	0.797689	0.999925	0.92607	0.0209556	0.999936	0.999956	0.9475	0.999253	0.0937005	0.358703	0.00973845	0.877323	0.666512	0.617211	0.478897	0.999996	0.76817	0.113428	0.999974	0.999939	0.967613	0.958875	0.94828	0.934312	0.993415	0.999967	0.999993	0.999951	0.137212	0.761605	0.536963	0.999963	0.936607	0.960042	0.384481	0.335341	0.70315	0.999996	0.817341	0.961392
Mrm3	4833420N02RIK	#N/A	#N/A	0.580171	0.710286	0.455944	0.882056	0.601693	0.876392	0.50872	0.999925	0.962967	0.655044	0.999936	0.999956	0.999914	0.996566	0.686763	0.959138	0.950475	0.760521	0.574162	0.886392	0.445193	0.999996	0.999842	0.999954	0.984983	0.999939	0.999994	0.958875	0.978735	0.655226	0.493962	0.999967	0.961605	0.999951	0.908027	0.947083	0.441941	0.999963	0.999992	0.959929	0.513009	0.894842	0.753419	0.999996	0.999976	0.978057
Iah1	4833421E05RIK	#N/A	#N/A	0.310317	0.640046	1.22598e-05	0.653919	0.63797	0.710082	0.283336	0.999925	0.952954	0.000292434	0.999936	0.999956	0.973675	0.996566	0.767339	0.42954	0.0534183	0.937001	0.385114	0.373917	0.134057	0.999996	0.810023	0.276112	0.999974	0.999939	0.938581	0.949273	0.404219	0.636352	0.721116	0.999967	0.961605	0.999951	0.505887	0.340533	0.412538	0.999963	0.805638	0.950284	0.568311	0.920269	0.125223	0.999996	0.999976	0.932819
Wdr70	4833422F06RIK	#N/A	#N/A	0.273838	0.355411	0.00760075	0.246185	0.571501	0.395694	0.584787	0.999925	0.861222	0.0429903	0.999936	0.999956	0.907207	0.996566	0.868993	0.426416	0.161547	0.293288	0.49214	0.349359	0.537637	0.999996	0.808437	0.465498	0.946978	0.999939	0.938581	0.958875	0.161073	0.947422	0.590707	0.999967	0.999993	0.999951	0.48371	0.905968	0.715615	0.999963	0.999992	0.968338	0.74527	0.288606	0.305868	0.999996	0.817341	0.932819
Mrpl47	4833424P18RIK	#N/A	#N/A	0.115354	0.447798	0.0412524	0.784619	0.86268	0.430485	0.240493	0.999925	0.907021	0.146453	0.999936	0.999956	0.926089	0.996566	0.0985634	0.0512862	0.573756	0.380416	0.838256	0.478114	0.903919	0.999996	0.428654	0.791804	0.947044	0.999939	0.953346	0.999915	0.271858	0.98148	0.263222	0.999967	0.999993	0.999951	0.230159	0.0917296	0.517791	0.999963	0.721568	0.960042	0.26312	0.325805	0.559911	0.999996	0.817341	0.960815
Pdp2	4833426J09RIK	#N/A	#N/A	0.949737	0.743473	0.527942	0.687543	0.978709	0.592784	0.827991	0.999925	0.962967	0.711355	0.999936	0.999956	0.952998	0.999982	0.669832	0.147755	0.265591	0.682415	0.694729	0.207511	0.81351	0.999996	0.620788	0.58683	0.984983	0.999939	0.938581	0.986333	0.94967	0.545866	0.663636	0.999967	0.961605	0.999951	0.587986	0.0823847	0.669076	0.999963	0.718577	0.960042	0.979706	0.884053	0.896837	0.999996	0.999976	0.999996
Fam166b	4833436C18RIK	#N/A	#N/A	0.764023	0.384265	0.384174	0.384972	0.771677	0.771901	0.774053	0.999925	0.871483	0.588805	0.999936	0.999956	0.973675	0.996566	0.994947	0.155172	0.0356636	0.473987	0.995131	0.998929	0.473846	0.999996	0.630589	0.226801	0.963213	0.999939	0.999994	0.958875	0.685483	0.688277	0.687524	0.999967	0.961605	0.999951	0.999823	0.176463	0.999823	0.999963	0.775838	0.999961	0.994257	0.408655	0.410283	0.999996	0.82743	0.932819
4833439L19Rik	4833439L19RIK	#N/A	#N/A	0.942082	0.291625	0.155416	0.309941	0.276215	0.967754	0.928241	0.999925	0.861222	0.352792	0.999936	0.999956	0.999914	0.999982	0.953333	0.998315	0.0628406	0.173829	0.460153	0.451477	0.45972	0.999996	0.999842	0.29912	0.946978	0.999939	0.953346	0.958875	0.298563	0.299936	0.260797	0.999967	0.947682	0.999951	0.673048	0.639719	0.200453	0.999963	0.903977	0.950269	0.510105	0.534451	0.598809	0.999996	0.916927	0.960815
Etfbkmt	4833442J19RIK	#N/A	#N/A	0.707863	0.236968	0.00498684	0.724284	0.234024	0.71245	0.753118	0.999925	0.859591	0.0314833	0.999936	0.999956	0.973675	0.996566	0.0710717	0.0164659	0.290423	0.284523	0.711151	0.301034	0.269082	0.999996	0.253997	0.608045	0.946978	0.999939	0.938581	0.949273	0.323472	0.324341	0.42351	0.999967	0.947682	0.999951	0.0454976	0.00317049	0.0478975	0.999963	0.204502	0.950269	0.396056	0.400132	0.983377	0.999996	0.82743	0.999996
Rictor	4921505C17RIK	#N/A	#N/A	0.73988	0.43386	0.704923	0.545353	0.201494	0.0828534	0.83661	0.999925	0.898862	0.839917	0.999936	0.999956	0.838755	0.999982	0.66434	0.0358315	0.811056	0.262173	0.3368	0.971683	0.666387	0.999996	0.371209	0.920125	0.946978	0.999939	0.999994	0.973317	0.453213	0.440232	0.753163	0.999967	0.957882	0.999951	0.72246	0.166227	0.304462	0.999963	0.775838	0.950269	0.306809	0.115647	0.605017	0.999996	0.674986	0.960815
Rbm4b	4921506I22RIK	#N/A	#N/A	0.590858	0.087583	0.0907158	0.121373	0.407694	0.842409	0.633914	0.999925	0.711344	0.25018	0.999936	0.999956	0.99897	0.996566	0.670974	0.444253	0.0860214	0.408517	0.361467	0.259061	0.803497	0.999996	0.821109	0.351261	0.957681	0.999939	0.938581	0.982783	0.827258	0.258903	0.139953	0.999967	0.947682	0.999951	0.720809	0.787601	0.67345	0.999963	0.950725	0.960042	0.367406	0.206304	0.466888	0.999996	0.754742	0.960815
Them4	4921507I02RIK	#N/A	#N/A	0.997896	0.536816	0.216614	0.998672	0.5292	0.21371	0.0677031	0.999925	0.922549	0.430283	0.999936	0.999956	0.907207	0.996566	0.180213	0.998518	0.996388	0.0495283	0.0479516	0.0486491	0.992117	0.999996	0.999842	0.999954	0.946978	0.999939	0.938581	0.999915	0.657262	0.654522	0.199875	0.999967	0.961605	0.999951	0.0167542	0.130043	0.132951	0.999963	0.761311	0.950269	0.660472	0.199794	0.199867	0.999996	0.749596	0.932819
Cep83	4921537D05RIK	#N/A	#N/A	0.624551	0.135201	0.102653	0.978647	0.821473	0.180158	0.632841	0.999925	0.774204	0.27284	0.999936	0.999956	0.907207	0.996566	0.983666	0.633695	0.295465	0.958874	0.776449	0.751562	0.579724	0.999996	0.903801	0.611286	0.999974	0.999939	0.971638	0.964401	0.568725	0.0325337	0.718294	0.999967	0.947682	0.999951	0.808704	0.530097	0.630602	0.999963	0.883647	0.960042	0.867172	0.918854	0.749684	0.999996	0.999976	0.977017
Dnaaf9	4930402H24RIK	#N/A	#N/A	0.0785183	0.506463	0.510937	0.574113	0.52006	0.0908852	0.0718303	0.999925	0.922549	0.700194	0.999936	0.999956	0.842129	0.996566	0.50333	0.540588	0.565444	0.0797294	0.0816657	0.0807791	0.535439	0.999996	0.856923	0.788496	0.946978	0.999939	0.938581	0.958875	0.371324	0.410883	0.322952	0.999967	0.947682	0.999951	0.388237	0.362441	0.362974	0.999963	0.805638	0.950269	0.129985	0.137802	0.135616	0.999996	0.704098	0.932819
Tmco1	4930403O06RIK	#N/A	#N/A	0.41375	0.91529	0.763112	0.468904	0.513642	0.508266	0.219628	0.999925	0.999976	0.870895	0.999936	0.999956	0.9475	0.996566	0.965721	0.658502	0.429493	0.311683	0.904814	0.756395	0.368058	0.999996	0.912061	0.708613	0.946978	0.999939	0.971638	0.949273	0.28396	0.681196	0.704161	0.999967	0.961605	0.999951	0.956009	0.924176	0.934575	0.999963	0.999992	0.999961	0.911398	0.60767	0.199227	0.999996	0.92531	0.932819
Ogfod1	4930415J21RIK	#N/A	#N/A	0.554639	0.404113	0.0202046	0.832548	0.352849	0.874234	0.690633	0.999925	0.882195	0.0889433	0.999936	0.999956	0.999914	0.996566	0.978557	0.424923	0.0606822	0.800925	0.766424	0.873877	0.745999	0.999996	0.806497	0.295341	0.991795	0.999939	0.999994	0.973317	0.248166	0.445498	0.885222	0.999967	0.959693	0.999951	0.845852	0.492725	0.958739	0.999963	0.862523	0.999961	0.824411	0.660488	0.693644	0.999996	0.92531	0.960815
Rhbdd1	4930418P06RIK	#N/A	#N/A	0.674124	0.912808	0.342246	0.682662	0.815678	0.565149	0.427125	0.999925	0.999976	0.554877	0.999936	0.999956	0.947799	0.996566	0.337859	0.768118	0.150585	0.283287	0.791582	0.660291	0.83304	0.999996	0.932758	0.453699	0.946978	0.999939	0.971638	0.993204	0.893906	0.740523	0.782793	0.999967	0.982794	0.999951	0.348934	0.910748	0.503675	0.999963	0.999992	0.960042	0.651097	0.635387	0.407586	0.999996	0.92531	0.932819
Dis3l2	4930429A22RIK	#N/A	#N/A	0.919819	0.256825	1.53833e-05	0.816937	0.414784	0.947101	0.212086	0.999925	0.861222	0.000351299	0.999936	0.999956	0.999914	0.996566	0.782979	0.413035	0.244083	0.135905	0.29276	0.721908	0.907967	0.999996	0.79883	0.562358	0.946978	0.999939	0.971638	0.999915	0.509558	0.387598	0.460527	0.999967	0.947682	0.999951	0.284765	0.704362	0.262762	0.999963	0.906851	0.950269	0.624505	0.464737	0.314917	0.999996	0.86665	0.932819
Ckap5	4930432B04RIK	#N/A	#N/A	0.260349	0.981911	0.963649	0.31226	0.297976	0.040049	0.333116	0.999925	0.999976	0.999944	0.999936	0.999956	0.724193	0.996566	0.295662	0.320663	0.963916	0.995164	0.334074	0.33556	0.972182	0.999996	0.763416	0.999954	0.999974	0.999939	0.938581	0.999915	0.110964	0.117191	0.14351	0.999967	0.947682	0.999951	0.165818	0.982672	0.983797	0.999963	0.999992	0.999961	0.954457	0.181153	0.977194	0.999996	0.740575	0.999996
Zfp943	4930432O21RIK	#N/A	#N/A	0.861383	0.082751	0.0574151	0.568424	0.746653	0.9523	0.432724	0.999925	0.70127	0.185112	0.999936	0.999956	0.999914	0.996566	0.984932	0.13104	0.31804	0.451419	0.881943	0.692311	0.440295	0.999996	0.593756	0.623552	0.963213	0.999939	0.971638	0.958875	0.745401	0.240627	0.887566	0.999967	0.947682	0.999951	0.924742	0.410618	0.989008	0.999963	0.808671	0.999961	0.909736	0.202024	0.307621	0.999996	0.750475	0.932819
Fbxw8	4930438M06RIK	#N/A	#N/A	0.287631	0.336581	0.305497	0.331406	0.292724	0.310246	0.317117	0.999925	0.861222	0.524631	0.999936	0.999956	0.907207	0.996566	0.86356	0.652838	0.750274	0.749431	0.974645	0.824709	0.964678	0.999996	0.910025	0.894146	0.984983	0.999939	0.988749	0.999915	0.297179	0.329733	0.330695	0.999967	0.947682	0.999951	0.877029	0.861907	0.834332	0.999963	0.991528	0.999961	0.92691	0.660814	0.811798	0.999996	0.92531	0.998865
4930453N24Rik	4930453N24RIK	#N/A	#N/A	0.110213	0.627165	0.0248699	0.699941	0.53054	0.064389	0.418892	0.999925	0.947474	0.102585	0.999936	0.999956	0.806591	0.996566	0.181246	0.530997	0.000545043	0.0818841	0.198458	0.304294	0.710289	0.999996	0.856548	0.0210844	0.946978	0.999939	0.938581	0.973317	0.571294	0.186959	0.808493	0.999967	0.947682	0.999951	0.974319	0.805039	0.203204	0.999963	0.959978	0.950269	0.0331851	0.163984	0.2342	0.999996	0.740575	0.932819
Timmdc1	4930455C21RIK	#N/A	#N/A	0.99832	0.56607	0.569514	0.5728	0.573348	0.995332	0.998124	0.999925	0.92607	0.73597	0.999936	0.999956	0.999914	0.999982	0.999418	0.999271	0.997614	0.566893	0.571707	0.561815	0.990808	0.999996	0.999842	0.999954	0.963213	0.999939	0.956624	0.999915	0.693752	0.690125	0.691044	0.999967	0.961605	0.999951	0.691254	0.683621	0.682072	0.999963	0.903977	0.960042	0.691789	0.684336	0.693661	0.999996	0.92531	0.960815
Ccdc181	4930455F23RIK	#N/A	#N/A	0.587332	0.536066	0.0242662	0.951975	0.37872	0.596668	0.0606457	0.999925	0.922549	0.101213	0.999936	0.999956	0.954965	0.996566	0.391275	0.367692	0.310727	0.399518	0.76752	0.0730545	0.506212	0.999996	0.769709	0.617648	0.95323	0.999939	0.938581	0.958875	0.818051	0.951499	0.192119	0.999967	0.999993	0.999951	0.737308	0.11755	0.914909	0.999963	0.753564	0.999961	0.30283	0.404008	0.182942	0.999996	0.82743	0.932819
Pomgnt1	4930467B06RIK	#N/A	#N/A	0.402126	0.981215	0.104258	0.997714	0.990708	0.390802	0.41174	0.999925	0.999976	0.275308	0.999936	0.999956	0.907207	0.996566	0.311398	0.309535	0.326888	0.975547	0.988898	0.98366	0.321169	0.999996	0.762382	0.629234	0.999974	0.999939	0.999994	0.949273	0.650099	0.646674	0.651178	0.999967	0.961605	0.999951	0.555745	0.567291	0.557252	0.999963	0.896623	0.960042	0.325082	0.307538	0.342873	0.999996	0.817341	0.932819
Itgb3bp	4930471O16RIK	#N/A	#N/A	0.954764	0.951346	0.204345	0.179409	0.979696	0.984004	0.126447	0.999925	0.999976	0.417526	0.999936	0.999956	0.999914	0.996566	0.90076	0.978621	0.198849	0.145365	0.966067	0.956724	0.156999	0.999996	0.999842	0.516048	0.946978	0.999939	0.999994	0.949273	0.687467	0.598895	0.0212236	0.999967	0.961605	0.999951	0.0465384	0.727756	0.587641	0.999963	0.919169	0.960042	0.967457	0.967896	0.16042	0.999996	0.999976	0.932819
Zfp672	4930488P06RIK	#N/A	#N/A	0.610417	0.14861	0.715973	0.307368	0.833714	0.871247	0.867882	0.999925	0.793872	0.849024	0.999936	0.999956	0.999914	0.999982	0.778517	0.142008	0.949824	0.198541	0.54396	0.778312	0.999199	0.999996	0.609329	0.999954	0.946978	0.999939	0.971714	0.999915	0.596728	0.342192	0.52713	0.999967	0.947682	0.999951	0.459933	0.317792	0.283757	0.999963	0.805638	0.950269	0.840438	0.283214	0.427509	0.999996	0.817341	0.940257
Mindy1	4930504E06RIK	#N/A	#N/A	0.972004	0.337916	0.983996	0.922884	0.780831	0.129166	0.743982	0.999925	0.861222	0.999944	0.999936	0.999956	0.896372	0.996566	0.649361	0.330376	0.287392	0.849025	0.426087	0.0825262	0.513251	0.999996	0.763416	0.606121	0.999974	0.999939	0.938581	0.958875	0.858893	0.672355	0.866503	0.999967	0.961605	0.999951	0.299842	0.505638	0.480429	0.999963	0.872249	0.960042	0.832412	0.104223	0.77503	0.999996	0.64229	0.987549
Lysmd4	4930506D23RIK	#N/A	#N/A	0.542096	0.499897	0.56078	0.123463	0.190598	0.914832	0.709433	0.999925	0.922549	0.729405	0.999936	0.999956	0.999914	0.996566	0.111678	0.863714	0.507567	0.578963	0.725982	0.453864	0.161415	0.999996	0.979079	0.763967	0.966303	0.999939	0.953346	0.949273	0.632761	0.600712	0.427026	0.999967	0.961605	0.999951	0.391847	0.531759	0.557494	0.999963	0.884022	0.960042	0.165833	0.674992	0.164887	0.999996	0.92531	0.932819
Shtn1	4930506M07RIK	#N/A	#N/A	0.732089	0.752574	0.292007	0.302088	0.737834	0.735355	0.0971372	0.999925	0.962967	0.512624	0.999936	0.999956	0.973675	0.996566	0.547299	0.53072	0.552018	0.228705	0.994469	0.228633	0.531519	0.999996	0.856548	0.782989	0.946978	0.999939	0.938581	0.958875	0.994931	0.984871	0.0345911	0.999967	0.999993	0.999951	0.669415	0.196978	0.197306	0.999963	0.775838	0.950269	0.675992	0.686733	0.686214	0.999996	0.92531	0.960815
Ccdc130	4930527D15RIK	#N/A	#N/A	0.368964	0.0838948	0.829473	0.589715	0.274101	0.401768	0.241265	0.999925	0.704565	0.913519	0.999936	0.999956	0.911052	0.996566	0.683195	0.910463	0.167525	0.444237	0.0256664	0.323127	0.384387	0.999996	0.999842	0.473408	0.963213	0.999939	0.938581	0.950709	0.892298	0.0910259	0.663503	0.999967	0.947682	0.999951	0.0893896	0.473651	0.944669	0.999963	0.849658	0.999961	0.156671	0.502505	0.219937	0.999996	0.897175	0.932819
Mfsd13a	4930538D17RIK	#N/A	#N/A	0.183696	0.533109	0.582884	0.427423	0.347381	0.0887703	0.445645	0.999925	0.922549	0.747477	0.999936	0.999956	0.839503	0.996566	0.0758806	0.851623	0.331441	0.810205	0.720749	0.38564	0.833334	0.999996	0.971462	0.631957	0.995877	0.999939	0.938581	0.993211	0.775621	0.107173	0.276057	0.999967	0.947682	0.999951	0.330359	0.644236	0.760987	0.999963	0.903977	0.984811	0.125553	0.443062	0.982646	0.999996	0.847621	0.999996
Tubb4b	4930542G03RIK	#N/A	#N/A	0.296815	0.969448	0.000208471	0.883669	0.901909	0.406609	0.502287	0.999925	0.999976	0.00281454	0.999936	0.999956	0.913829	0.996566	0.355384	0.174021	0.130507	0.491609	0.712129	0.618296	0.829092	0.999996	0.648	0.426046	0.963213	0.999939	0.967613	0.993204	0.536271	0.560997	0.724668	0.999967	0.961605	0.999951	0.678403	0.176477	0.725701	0.999963	0.775838	0.97134	0.390937	0.558758	0.547331	0.999996	0.92531	0.960815
4930544G11Rik	4930544G11RIK	#N/A	#N/A	0.45877	0.997515	0.128625	0.43684	0.452125	0.125171	0.448318	0.999925	0.999976	0.314519	0.999936	0.999956	0.891689	0.996566	0.176234	0.648534	0.64619	0.661725	0.18037	0.161211	0.644839	0.999996	0.907753	0.840648	0.984983	0.999939	0.938581	0.973317	0.377869	0.35958	0.364502	0.999967	0.947682	0.999951	0.0842334	0.523959	0.552606	0.999963	0.881328	0.960042	0.992023	0.173082	0.985982	0.999996	0.740575	0.999996
Slc48a1	4930570C03RIK	#N/A	#N/A	0.315225	0.632996	0.637201	0.136934	0.992006	0.143042	0.0957754	0.999925	0.949405	0.79144	0.999936	0.999956	0.906578	0.996566	0.537794	0.219873	0.983452	0.883856	0.899594	0.848595	0.993313	0.999996	0.691188	0.999954	0.999974	0.999939	0.996397	0.999915	0.465885	0.461948	0.029078	0.999967	0.961605	0.999951	0.772815	0.539328	0.927655	0.999963	0.887392	0.999961	0.494402	0.197008	0.898638	0.999996	0.748649	0.999996
Them6	4930572J05RIK	#N/A	#N/A	0.682066	0.967894	0.340797	0.50908	0.157663	0.503176	0.614928	0.999925	0.999976	0.553972	0.999936	0.999956	0.9475	0.996566	0.400366	0.792702	0.258319	0.83872	0.974786	0.44671	0.938017	0.999996	0.937695	0.579322	0.999974	0.999939	0.953346	0.999915	0.213685	0.624127	0.425086	0.999967	0.961605	0.999951	0.603147	0.543298	0.867069	0.999963	0.889616	0.999961	0.468472	0.653503	0.91004	0.999996	0.92531	0.999996
Clec4g	4930572L20RIK	#N/A	#N/A	0.827023	0.0625135	0.00016382	0.705745	0.877848	0.643674	0.713967	0.999925	0.630384	0.00232524	0.999936	0.999956	0.973675	0.996566	0.538758	0.0851117	0.21504	0.254663	0.347255	0.730358	0.624328	0.999996	0.509954	0.533431	0.946978	0.999939	0.971638	0.972703	0.967694	0.371103	0.994494	0.999967	0.947682	0.999951	0.364049	0.409186	0.341109	0.999963	0.807921	0.950269	0.761144	0.0657613	0.544864	0.999996	0.552168	0.960815
Tecpr2	4930573I19RIK	#N/A	#N/A	0.942615	0.799079	0.24749	0.79276	0.631114	0.278712	0.974561	0.999925	0.968707	0.464963	0.999936	0.999956	0.907207	0.999982	0.756886	0.516516	0.790912	0.875039	0.986249	0.984322	0.937533	0.999996	0.855983	0.907695	0.999974	0.999939	0.999994	0.999915	0.702175	0.356748	0.872865	0.999967	0.947682	0.999951	0.861185	0.706463	0.962361	0.999963	0.908201	0.999961	0.77164	0.553505	0.834236	0.999996	0.924968	0.999996
Adal	4930578F03RIK	#N/A	#N/A	0.990987	0.993955	0.141236	0.174616	0.951185	0.980549	0.159111	0.999925	0.999976	0.333587	0.999936	0.999956	0.999914	0.996566	0.629484	0.167319	0.619075	0.642174	0.65327	0.16404	0.164064	0.999996	0.644863	0.822698	0.984983	0.999939	0.938581	0.949273	0.378609	0.695126	0.518358	0.999967	0.96257	0.999951	0.536095	0.0745818	0.529906	0.999963	0.707439	0.960042	0.980224	0.993343	0.175899	0.999996	0.999976	0.932819
Smchd1	4931400A14RIK	#N/A	#N/A	0.326245	0.310283	0.249792	0.300839	0.289835	0.328549	0.391024	0.999925	0.861222	0.467639	0.999936	0.999956	0.907207	0.996566	0.56079	0.664593	0.479987	0.226104	0.630357	0.342941	0.227344	0.999996	0.913829	0.75119	0.946978	0.999939	0.938581	0.949273	0.314902	0.326384	0.350641	0.999967	0.947682	0.999951	0.951536	0.408817	0.9984	0.999963	0.807921	0.999961	0.355772	0.648194	0.0442534	0.999996	0.92531	0.932819
4931406C07Rik	4931406C07RIK	#N/A	#N/A	0.314747	0.417461	0.991163	0.648063	0.662729	0.675416	0.976657	0.999925	0.891407	0.999944	0.999936	0.999956	0.973675	0.999982	0.865279	0.652527	0.152265	0.559369	0.121183	0.405851	0.294108	0.999996	0.909835	0.453788	0.963213	0.999939	0.943203	0.949273	0.652772	0.340948	0.738069	0.999967	0.947682	0.999951	0.199691	0.339797	0.226839	0.999963	0.805638	0.950269	0.358844	0.799835	0.75541	0.999996	0.974092	0.978754
Garre1	4931406P16RIK	#N/A	#N/A	0.539574	0.474525	0.0140122	0.77003	0.985005	0.825426	0.796776	0.999925	0.922054	0.0677121	0.999936	0.999956	0.99205	0.998612	0.792146	0.722471	0.734899	0.820596	0.384284	0.583288	0.761442	0.999996	0.932672	0.887582	0.999974	0.999939	0.959087	0.973317	0.65886	0.712514	0.979342	0.999967	0.969647	0.999951	0.422011	0.889905	0.956297	0.999963	0.999992	0.999961	0.673298	0.533889	0.714289	0.999996	0.916927	0.965364
Mterf1a	4931431L11RIK	#N/A	#N/A	0.889355	0.843854	0.00372131	0.160879	0.349891	0.973809	0.156293	0.999925	0.986677	0.0253961	0.999936	0.999956	0.999914	0.996566	0.263405	0.737545	0.111092	0.647106	0.704652	0.904118	0.0323429	0.999996	0.932672	0.398183	0.984983	0.999939	0.999994	0.927096	0.477101	0.913276	0.991382	0.999967	0.999993	0.999951	0.346508	0.773272	0.274202	0.999963	0.943187	0.950269	0.551161	0.863683	0.0450217	0.999996	0.999976	0.932819
Xkr8	4931440N07RIK	#N/A	#N/A	0.805804	0.359592	0.000459397	0.446537	0.973454	0.845816	0.739305	0.999925	0.861222	0.00518105	0.999936	0.999956	0.999812	0.996566	0.79664	0.408405	0.179269	0.925899	0.620495	0.833572	0.307124	0.999996	0.795043	0.490985	0.999974	0.999939	0.991153	0.949273	0.866949	0.384594	0.734205	0.999967	0.947682	0.999951	0.618718	0.493366	0.460757	0.999963	0.862805	0.960042	0.858563	0.643309	0.486734	0.999996	0.92531	0.960815
Hdac4	4932408F19RIK	#N/A	#N/A	0.998793	0.976358	0.990354	0.142244	0.986411	0.137793	0.996609	0.999925	0.999976	0.999944	0.999936	0.999956	0.905524	0.999982	0.994475	0.173861	0.482044	0.499479	0.994263	0.983638	0.500512	0.999996	0.647727	0.752287	0.963213	0.999939	0.999994	0.958875	0.989619	0.307039	0.301879	0.999967	0.947682	0.999951	0.999862	0.384259	0.999151	0.999963	0.807921	0.999961	0.991312	0.288657	0.304475	0.999996	0.817341	0.932819
Phf14	4932409F11RIK	#N/A	#N/A	0.992463	0.569589	0.990395	0.571079	0.989615	0.568186	0.558308	0.999925	0.926741	0.999944	0.999936	0.999956	0.948093	0.996566	0.767707	0.374256	0.759057	0.141437	0.785631	0.373111	0.770984	0.999996	0.771161	0.894714	0.946978	0.999939	0.938581	0.973317	0.997998	0.426666	0.989318	0.999967	0.948449	0.999951	0.67671	0.199176	0.199921	0.999963	0.775838	0.950269	0.987451	0.998836	0.423488	0.999996	0.999976	0.937303
Tapt1	4932414K18RIK	#N/A	#N/A	0.293967	0.557972	0.0172203	0.0996461	0.703489	0.113323	0.52557	0.999925	0.923149	0.0790207	0.999936	0.999956	0.874503	0.996566	0.520947	0.84293	0.0368474	0.140879	0.76091	0.215769	0.976199	0.999996	0.967026	0.230404	0.946978	0.999939	0.938581	0.999915	0.670166	0.519741	0.512653	0.999967	0.961605	0.999951	0.853832	0.568828	0.42991	0.999963	0.897717	0.953406	0.256828	0.0908784	0.0763985	0.999996	0.60882	0.932819
[truncated: 6,581 more rows]
[truncated: 16 more columns]

## Sheet: p-value
GENE_ID	GENE	HUGO_gene_id	3WA_T_chr_p	3WA_T_sry_p	3WA_T_treatment_p	3WA_T_chr:sry_p	3WA_T_chr:treatment_p	3WA_T_sry:treatment_p	3WA_T_chr:sry:treatment_p	3WA_E_chr_p	3WA_E_sry_p	3WA_E_treatment_p	3WA_E_chr:sry_p	3WA_E_chr:treatment_p	3WA_E_sry:treatment_p	3WA_E_chr:sry:treatment_p	2WA_T_chr.p	2WA_T_sry.p	2WA_T_chr.sry.p	2WA_E_chr.p	2WA_E_sry.p	2WA_E_chr.sry.p	2WA_B_chr.p	2WA_B_sry.p	2WA_B_chr.sry.p	1WA_TB_XYM.p	1WA_TB_XYF.p	1WA_TB_XXM.p	1WA_TB_XXF.p	1WA_EB_XYM.p	1WA_EB_XYF.p	1WA_EB_XXM.p	1WA_EB_XXF.p		min.pval
[truncated: 7,466 more rows]

[truncated: 1 more sheets: FDR]
